# Supplementary material for: Simultaneous quantification of mRNA and protein in single cells reveals post-transcriptional effects of genetic variation
Source: eLife journal article supplement (doi:10.7554/elife.60645), 2020-11-16

### 1) QTL affecting mRNA and protein in the same direction

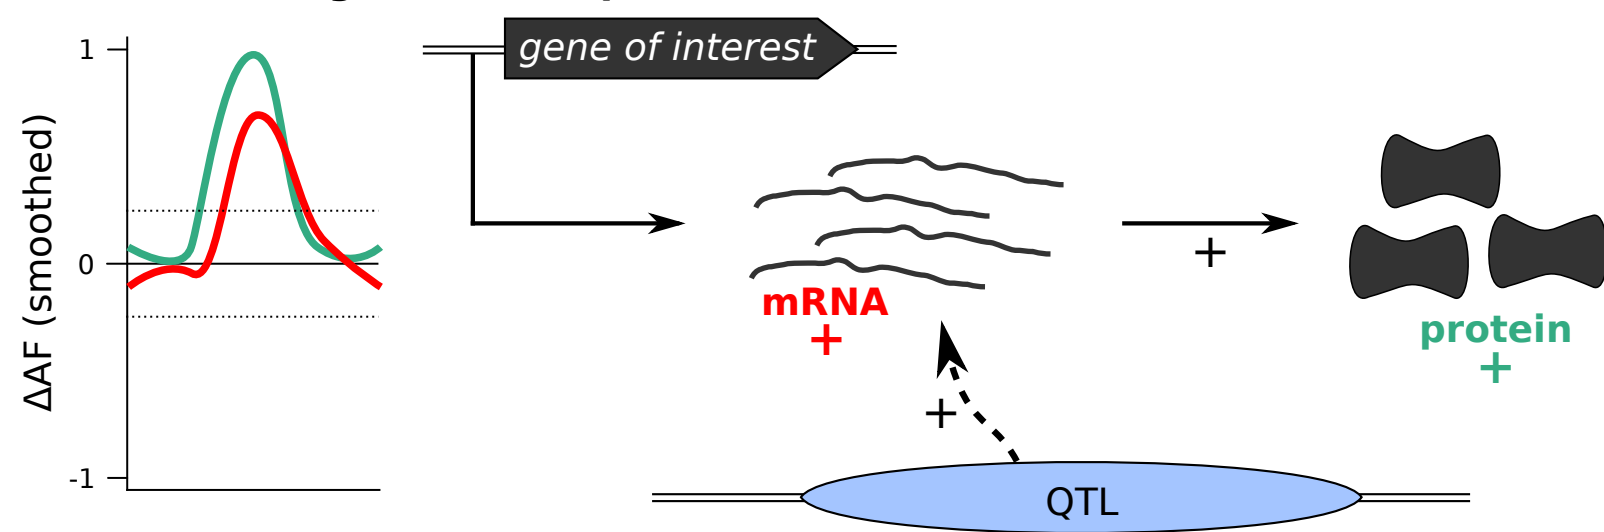

### 2) Protein specific QTL

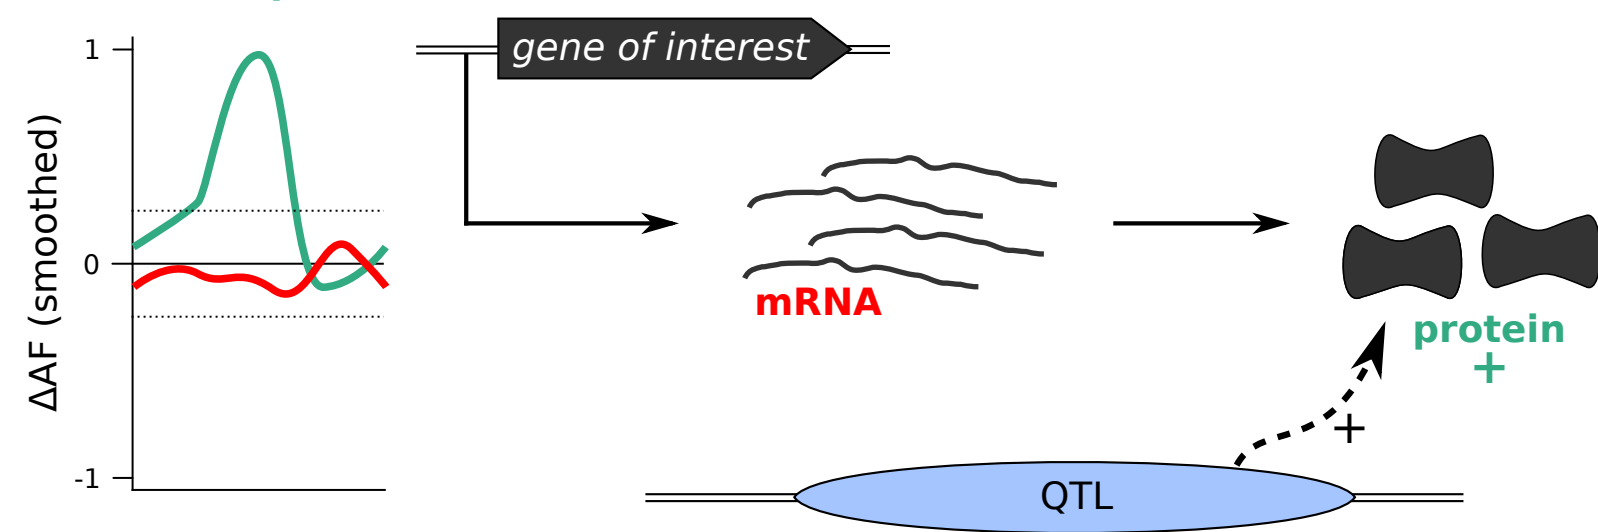

### 3) mRNA specific QTL

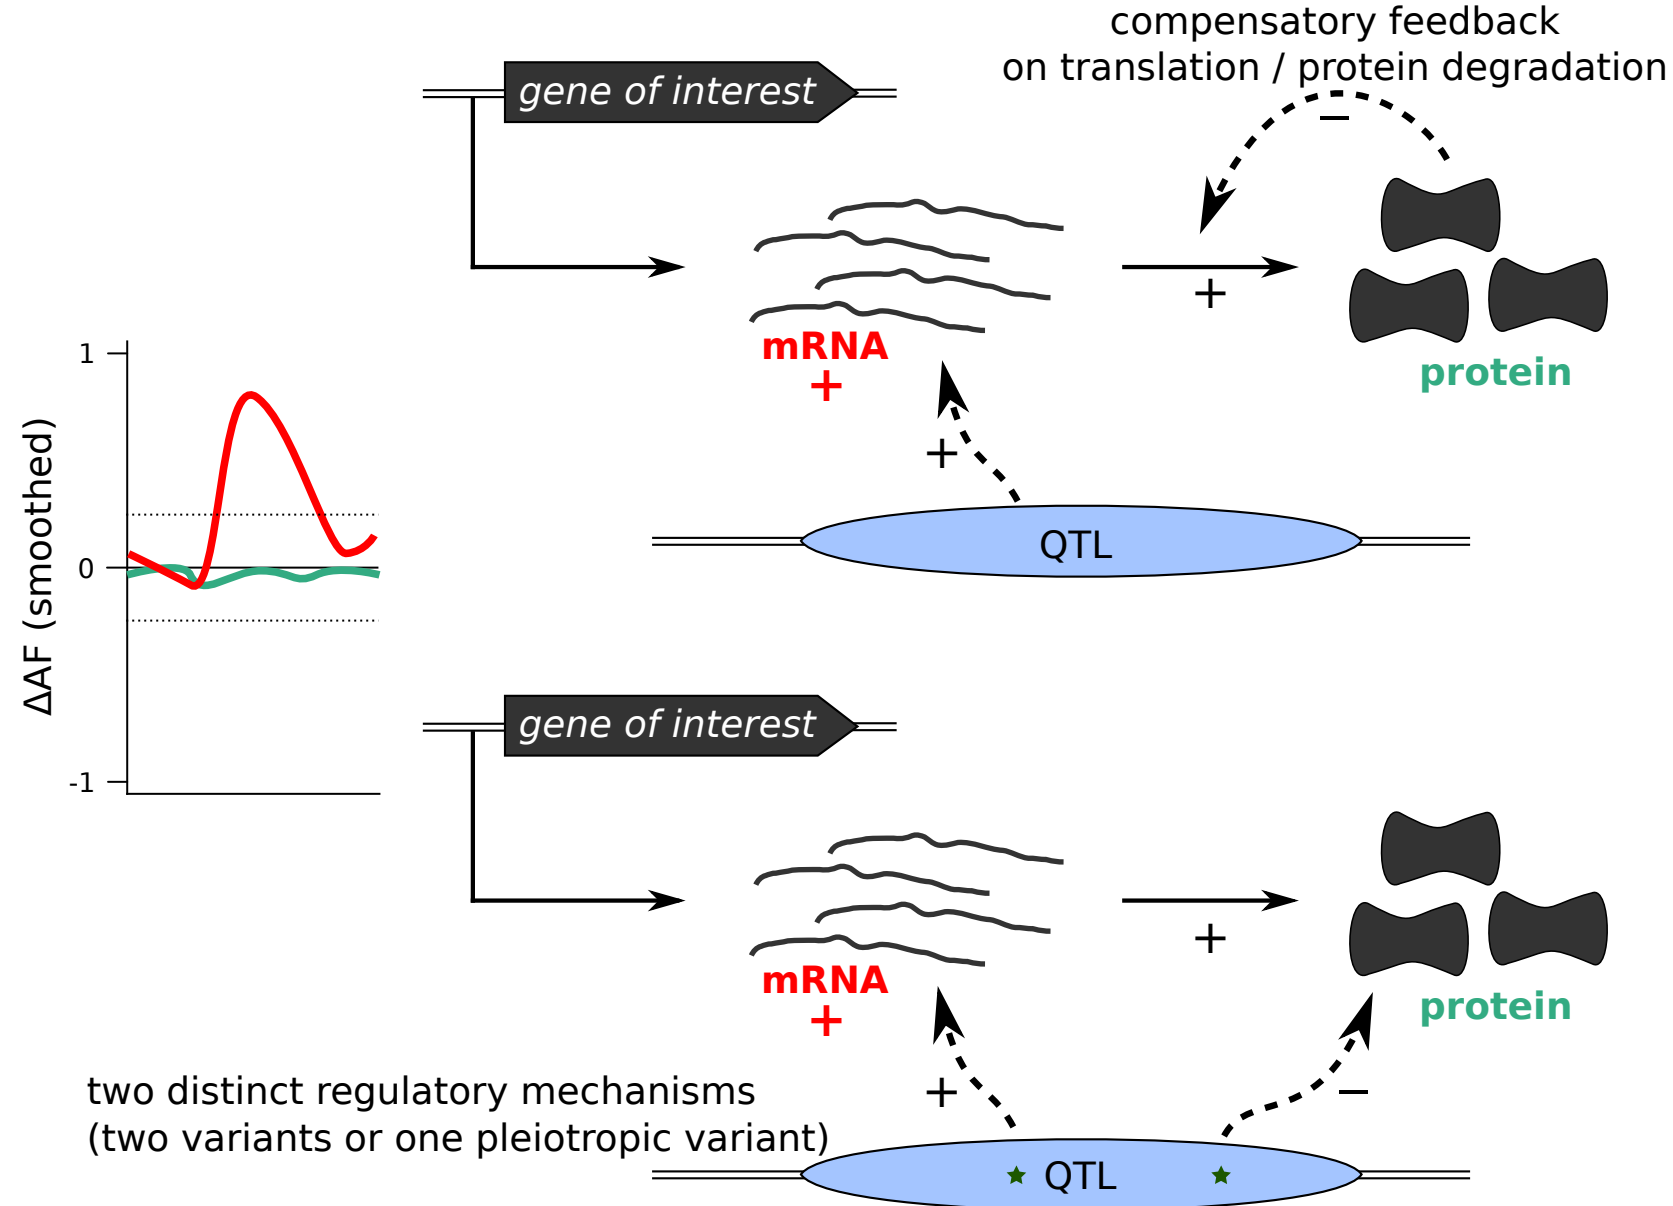

### 4) Discordant QTL affecting mRNA and protein in opposite directions

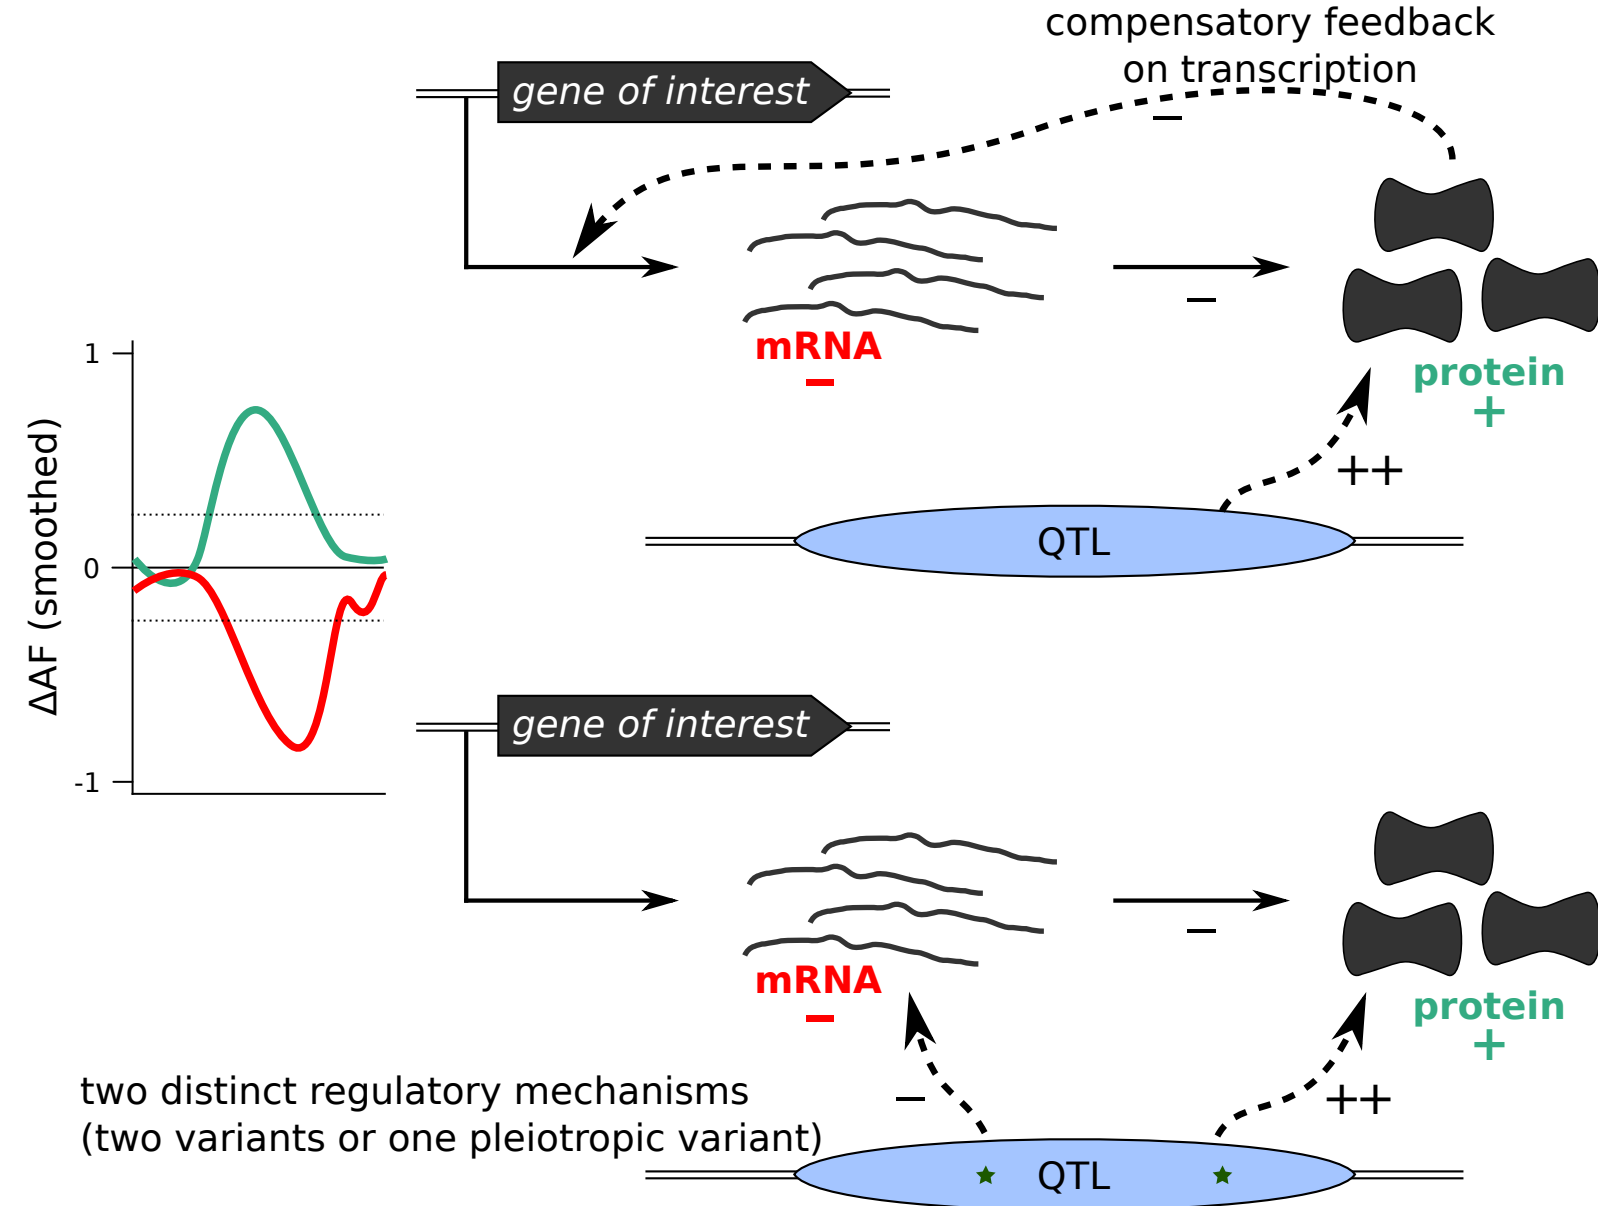

Supplement: supp [file elife-60645-supp-v1.zip]
