# Supplementary material for: Simultaneous quantification of mRNA and protein in single cells reveals post-transcriptional effects of genetic variation
Source: eLife journal article supplement (doi:10.7554/elife.60645), 2020-11-16
Supplement: supp [file elife-60645-supp-v1.zip]

Archive with 29 entries (29 files):
- elife_poa_e60645_Supplementary_file_1.xlsx
- elife_poa_e60645_Supplementary_file_2.xlsx
- elife_poa_e60645_Supplementary_file_3.xlsx
- elife_poa_e60645_Supplementary_File_4.xlsx
- elife_poa_e60645_Figure_4_source_data_1.xlsx
- elife_poa_e60645_Figure_4_source_data_2.xlsx
- elife_poa_e60645_Figure_4_source_data_3.xlsx
- elife_poa_e60645_Figure_5_source_data_1.xlsx
- elife_poa_e60645_Figure_5_source_data_2.xlsx
- elife_poa_e60645_Figure_7_source_data_1.xlsx
- elife_poa_e60645_Figure_7_source_data_2.xlsx
- elife_poa_e60645_Figure_7_source_data_3.xlsx
- elife_poa_e60645_Figure_7_source_data_4.xlsx
- elife_poa_e60645_Transparent_Reporting_File.docx
- elife_poa_e60645_Figure_1_figure_supplement_1.pdf
- elife_poa_e60645_Figure_1_figure_supplement_2.pdf
- elife_poa_e60645_Figure_2_figure_supplement_1.pdf
- elife_poa_e60645_Figure_2_figure_supplement_2.pdf
- elife_poa_e60645_Figure_2_figure_supplement_3.pdf
- elife_poa_e60645_Figure_2_figure_supplement_4.pdf
- elife_poa_e60645_Figure_3_figure_supplement_1.pdf
- elife_poa_e60645_Figure_3_figure_supplement_2.pdf
- elife_poa_e60645_Figure_3_figure_supplement_3.pdf
- elife_poa_e60645_Figure_4_figure_supplement_1.pdf
- elife_poa_e60645_Figure_4_figure_supplement_2.pdf
- elife_poa_e60645_Figure_5_figure_supplement_1.pdf
- elife_poa_e60645_Figure_6_figure_supplement_1.pdf
- elife_poa_e60645_Figure_6_figure_supplement_2.pdf
- elife_poa_e60645_Figure_7_figure_supplement_1.pdf
