# Supplementary material for: Simultaneous quantification of mRNA and protein in single cells reveals post-transcriptional effects of genetic variation
Source: eLife journal article supplement (doi:10.7554/elife.60645), 2020-11-16
Supplement: supp [file elife-60645-supp-v1.zip › elife_poa_e60645_Figure_4_source_data_1.xlsx]

## Sheet: Sheet1
SourceData_04_1: List of all detected QTLs (LOD score > 3.0) before combining replicates
sysname	gene	bio_rep_index	tech_rep_index	date	tube	fluorecence	chromosome	max_position	maxLOD	left_position	right_position	deltaAF	deltaAF_OtherFluo	LOD_OtherFluo	type_overlap
YGL202W	ARO8	0	1	180515	ARO8_a_0_1	gfp	1	156100	4.61	93400	207800	-0.0881829	0.0059396	0.4	specific
YGL202W	ARO8	0	1	180515	ARO8_a_0_1	gfp	2	134800	14.51	114500	154500	0.174687	0.110824	7.63	shared
YGL202W	ARO8	0	1	180515	ARO8_a_0_1	gfp	2	430000	3.17	372300	541000	-0.0808518	-0.0292418	1.71	specific
YGL202W	ARO8	0	1	180515	ARO8_a_0_1	gfp	3	131600	3.26	77400	184200	0.0640574	-0.00484344	0.41	specific
YGL202W	ARO8	0	1	180515	ARO8_a_0_1	gfp	4	171200	5.94	140400	215700	-0.111998	-0.0730474	3.87	shared
YGL202W	ARO8	0	1	180515	ARO8_a_0_1	gfp	4	691900	7.29	634800	763800	0.122262	-0.0296749	1.15	specific
YGL202W	ARO8	0	1	180515	ARO8_a_0_1	gfp	4	998800	3.91	945800	1055300	0.079001	0.00256415	0.46	specific
YGL202W	ARO8	0	1	180515	ARO8_a_0_1	gfp	4	1374000	4.5	1332700	1430900	0.0932665	-0.0308754	0.71	specific
YGL202W	ARO8	0	1	180515	ARO8_a_0_1	gfp	5	397600	10.18	345600	445500	-0.124581	-0.0532048	1.92	specific
YGL202W	ARO8	0	1	180515	ARO8_a_0_1	gfp	7	379600	3.07	301900	425100	0.0978554	0.0476924	1.42	specific
YGL202W	ARO8	0	1	180515	ARO8_a_0_1	gfp	8	439500	11.16	398300	469900	-0.125371	-0.0228101	0.45	specific
YGL202W	ARO8	0	1	180515	ARO8_a_0_1	gfp	10	157500	11.42	123300	216500	-0.129964	0.0372845	0.48	specific
YGL202W	ARO8	0	1	180515	ARO8_a_0_1	gfp	11	222300	31.6	201300	278700	-0.213079	-0.0462106	3.01	shared
YGL202W	ARO8	0	1	180515	ARO8_a_0_1	gfp	12	326300	3.25	248100	387100	-0.0773547	0.0063885	0.4	specific
YGL202W	ARO8	0	1	180515	ARO8_a_0_1	gfp	12	842500	3.33	711000	1030600	-0.0806738	-0.0105002	0.61	specific
YGL202W	ARO8	0	1	180515	ARO8_a_0_1	gfp	13	22500	5.21	0	65900	-0.152834	-0.0864353	4.63	shared
YGL202W	ARO8	0	1	180515	ARO8_a_0_1	gfp	13	250800	16.25	224000	270600	0.179973	0.0471525	1.29	specific
YGL202W	ARO8	0	1	180515	ARO8_a_0_1	gfp	13	743100	5.62	669200	872700	0.079941	0.0255636	0.52	specific
YGL202W	ARO8	0	1	180515	ARO8_a_0_1	gfp	14	165700	127.99	155200	176800	-0.505275	-0.0842049	3.37	shared
YGL202W	ARO8	0	1	180515	ARO8_a_0_1	gfp	14	476400	11.39	454100	588100	0.160857	0.308509	48.73	shared
YGL202W	ARO8	0	1	180515	ARO8_a_0_1	gfp	15	164700	3.2	124300	233300	0.0958546	-0.0304168	0.52	specific
YGL202W	ARO8	0	1	180515	ARO8_a_0_1	gfp	15	700500	21.81	685200	730900	0.19066	0.00913104	0.58	specific
YGL202W	ARO8	0	1	180515	ARO8_a_0_1	gfp	16	176400	5.24	121700	365600	0.0973933	0.0376117	1.41	specific
YGL202W	ARO8	0	1	180515	ARO8_a_0_1	mch	2	132700	7.67	86400	166900	0.110725	0.175898	14.47	shared
YGL202W	ARO8	0	1	180515	ARO8_a_0_1	mch	2	600700	9.15	556000	632400	-0.115481	0.0109432	0.47	specific
YGL202W	ARO8	0	1	180515	ARO8_a_0_1	mch	4	96100	5.56	0	190000	-0.0784902	-0.0358796	2.2	specific
YGL202W	ARO8	0	1	180515	ARO8_a_0_1	mch	5	350800	3.49	235400	427300	-0.0602864	-0.106762	8.49	shared
YGL202W	ARO8	0	1	180515	ARO8_a_0_1	mch	8	114100	9.24	84700	148300	-0.154154	0.0106634	0.45	specific
YGL202W	ARO8	0	1	180515	ARO8_a_0_1	mch	11	322600	6.42	281900	455600	-0.0964676	-0.171105	18.78	shared
YGL202W	ARO8	0	1	180515	ARO8_a_0_1	mch	13	67000	9.46	46600	84000	-0.125437	-0.0858026	3.09	shared
YGL202W	ARO8	0	1	180515	ARO8_a_0_1	mch	14	108300	4.71	41000	230800	-0.0826059	-0.418936	84.9	shared
YGL202W	ARO8	0	1	180515	ARO8_a_0_1	mch	14	460700	49.74	448500	482200	0.314935	0.161572	10.64	shared
YGL202W	ARO8	0	1	180515	ARO8_a_0_1	mch	15	572900	9.89	516700	592200	0.117241	0.0844459	7.2	shared
YGL202W	ARO8	0	1	180515	ARO8_a_0_1	mch	16	240500	3.72	182200	316000	0.0792554	0.0666839	4.03	shared
YGL202W	ARO8	1	1	190201	ARO8_a_1_1	gfp	1	130700	5.66	98200	207800	-0.123504	0.012958	0.41	specific
YGL202W	ARO8	1	1	190201	ARO8_a_1_1	gfp	4	614900	4.44	474800	722700	0.0818448	0.0278058	0.79	specific
YGL202W	ARO8	1	1	190201	ARO8_a_1_1	gfp	4	865100	3.6	771400	1048200	0.0609496	-0.0059635	0.4	specific
YGL202W	ARO8	1	1	190201	ARO8_a_1_1	gfp	5	372400	7.96	340300	447000	-0.101176	-0.054078	1.62	specific
YGL202W	ARO8	1	1	190201	ARO8_a_1_1	gfp	8	431700	5.19	365200	483500	-0.0791229	-0.0323285	0.67	specific
YGL202W	ARO8	1	1	190201	ARO8_a_1_1	gfp	9	189200	3.77	103800	244300	-0.079617	-0.0411526	0.6	specific
YGL202W	ARO8	1	1	190201	ARO8_a_1_1	gfp	11	248200	18.72	181100	276000	-0.182921	-0.0552838	2.84	specific
YGL202W	ARO8	1	1	190201	ARO8_a_1_1	gfp	12	627700	3.17	560400	710000	0.0679145	-0.0283726	0.41	specific
YGL202W	ARO8	1	1	190201	ARO8_a_1_1	gfp	13	42300	4.37	0	92800	-0.0814747	-0.0736552	3.82	shared
YGL202W	ARO8	1	1	190201	ARO8_a_1_1	gfp	13	419900	5.12	381900	486700	0.103961	0.0348563	1.32	specific
YGL202W	ARO8	1	1	190201	ARO8_a_1_1	gfp	13	678400	9.71	646000	716900	0.12493	0.0314518	0.78	specific
YGL202W	ARO8	1	1	190201	ARO8_a_1_1	gfp	14	158600	43.69	141800	178700	-0.300645	0.0061692	0.4	specific
YGL202W	ARO8	1	1	190201	ARO8_a_1_1	gfp	14	459800	18.71	443900	486800	0.203423	0.26665	43.43	shared
YGL202W	ARO8	1	1	190201	ARO8_a_1_1	gfp	15	131300	4.66	97500	216400	0.0887792	0.0318858	0.94	specific
YGL202W	ARO8	1	1	190201	ARO8_a_1_1	gfp	15	707200	4.68	633900	856000	0.105742	-0.0544004	1.12	specific
YGL202W	ARO8	1	1	190201	ARO8_a_1_1	gfp	16	281900	3.16	69800	391900	0.0737884	0.045098	1.46	specific
YGL202W	ARO8	1	1	190201	ARO8_a_1_1	mch	2	101800	5.86	31900	157400	0.111256	0.040455	0.99	specific
YGL202W	ARO8	1	1	190201	ARO8_a_1_1	mch	2	628900	3.06	506400	718700	-0.0793261	-0.00493823	0.4	specific
YGL202W	ARO8	1	1	190201	ARO8_a_1_1	mch	4	228300	3.13	0	285400	-0.0545437	-0.0466472	1.24	specific
YGL202W	ARO8	1	1	190201	ARO8_a_1_1	mch	8	92300	7.14	54100	126800	-0.149011	-0.0268935	0.85	specific
YGL202W	ARO8	1	1	190201	ARO8_a_1_1	mch	10	160700	3.21	0	589200	0.0630873	-0.0744914	1.98	specific
YGL202W	ARO8	1	1	190201	ARO8_a_1_1	mch	11	259000	3.02	80800	513700	-0.0566379	-0.17678	17.96	shared
YGL202W	ARO8	1	1	190201	ARO8_a_1_1	mch	13	89400	5.53	35500	150200	-0.103927	-0.0557205	2.66	specific
YGL202W	ARO8	1	1	190201	ARO8_a_1_1	mch	14	463600	43.72	452400	478300	0.265524	0.203233	18.61	shared
YDR099W	BMH2	0	1	180515	BMH2_a_0_1	gfp	1	166100	13.41	124200	207800	-0.142125	0.0116759	0.41	specific
YDR099W	BMH2	0	1	180515	BMH2_a_0_1	gfp	4	158500	7.49	124800	222800	-0.119115	-0.0739877	3.06	shared
YDR099W	BMH2	0	1	180515	BMH2_a_0_1	gfp	4	1332900	4.11	1291800	1403300	-0.0772251	-0.0755265	2.02	specific
YDR099W	BMH2	0	1	180515	BMH2_a_0_1	gfp	5	460000	10.09	418100	497900	-0.120851	-0.0407811	0.71	specific
YDR099W	BMH2	0	1	180515	BMH2_a_0_1	gfp	7	360700	8.35	321700	400300	0.135611	0.0788139	3.02	shared
YDR099W	BMH2	0	1	180515	BMH2_a_0_1	gfp	7	852300	3.65	783400	930800	-0.0918719	-0.0271195	0.81	specific
YDR099W	BMH2	0	1	180515	BMH2_a_0_1	gfp	8	399300	4.45	228400	447200	-0.0878119	-0.0187966	0.98	specific
YDR099W	BMH2	0	1	180515	BMH2_a_0_1	gfp	10	176100	17.47	149400	223000	-0.159267	0.0308385	1.01	specific
YDR099W	BMH2	0	1	180515	BMH2_a_0_1	gfp	10	659300	3.29	519500	741700	0.0701835	-0.102278	3.34	opposite_direction
YDR099W	BMH2	0	1	180515	BMH2_a_0_1	gfp	11	287300	77.04	274700	302000	-0.348543	-0.00046538	0.4	specific
YDR099W	BMH2	0	1	180515	BMH2_a_0_1	gfp	12	673000	7.58	633200	706000	-0.112757	-0.0325581	1	specific
YDR099W	BMH2	0	1	180515	BMH2_a_0_1	gfp	13	315500	15.26	239500	356100	0.169515	0.0425084	1.42	specific
YDR099W	BMH2	0	1	180515	BMH2_a_0_1	gfp	14	214400	14.11	168000	249400	-0.161517	-0.0324939	0.9	specific
YDR099W	BMH2	0	1	180515	BMH2_a_0_1	gfp	15	212600	12.01	151500	234000	-0.126299	0.0121638	0.51	specific
YDR099W	BMH2	0	1	180515	BMH2_a_0_1	mch	2	575500	13.19	537100	601800	-0.152999	0.07039	2.06	specific
YDR099W	BMH2	0	1	180515	BMH2_a_0_1	mch	4	49200	3.93	0	254100	-0.0896716	-0.0245936	2.49	specific
YDR099W	BMH2	0	1	180515	BMH2_a_0_1	mch	5	334100	3.97	183000	415400	-0.0773546	-0.08203	6.18	shared
YDR099W	BMH2	0	1	180515	BMH2_a_0_1	mch	7	337100	3.82	250800	394500	0.0812087	0.126169	7.88	shared
YDR099W	BMH2	0	1	180515	BMH2_a_0_1	mch	8	85200	6	49600	212300	-0.101835	0.00991633	0.41	specific
YDR099W	BMH2	0	1	180515	BMH2_a_0_1	mch	10	669900	3.52	593900	741700	-0.0994978	0.0661672	2.97	specific
YDR099W	BMH2	0	1	180515	BMH2_a_0_1	mch	12	117800	4.4	87300	168800	0.0965286	0.0012057	0.43	specific
YDR099W	BMH2	0	1	180515	BMH2_a_0_1	mch	13	73800	4.08	0	127600	-0.102824	0.0177545	1.1	specific
YDR099W	BMH2	0	1	180515	BMH2_a_0_1	mch	14	472000	59.94	454500	486100	0.327481	0.067581	2.32	specific
YDR099W	BMH2	0	1	180515	BMH2_a_0_1	mch	15	545900	8.3	500800	582000	0.114465	-0.029946	1.22	specific
YDR099W	BMH2	1	1	190201	BMH2_a_1_1	gfp	1	138700	8.08	116500	207800	-0.134223	-0.0194422	0.4	specific
YDR099W	BMH2	1	1	190201	BMH2_a_1_1	gfp	2	189600	3.6	76000	241100	-0.0682774	0.0110783	0.4	specific
YDR099W	BMH2	1	1	190201	BMH2_a_1_1	gfp	4	191100	5.05	155000	240400	-0.0990549	-0.0838672	3.39	shared
YDR099W	BMH2	1	1	190201	BMH2_a_1_1	gfp	5	391600	3.34	222700	497200	-0.0721846	-0.0193923	0.62	specific
YDR099W	BMH2	1	1	190201	BMH2_a_1_1	gfp	7	401100	3.08	321900	476800	0.0871832	0.0105667	0.66	specific
YDR099W	BMH2	1	1	190201	BMH2_a_1_1	gfp	8	447300	3.07	202900	554900	-0.0567235	-0.00186651	0.74	specific
YDR099W	BMH2	1	1	190201	BMH2_a_1_1	gfp	10	167700	27.25	135800	203100	-0.232968	0.0394802	1.04	specific
YDR099W	BMH2	1	1	190201	BMH2_a_1_1	gfp	10	628100	4.39	596300	700700	0.0984577	0.0107434	0.4	specific
YDR099W	BMH2	1	1	190201	BMH2_a_1_1	gfp	11	323000	46.26	286600	347100	-0.282948	0.0101113	0.4	specific
YDR099W	BMH2	1	1	190201	BMH2_a_1_1	gfp	13	363800	6.23	174200	406400	0.0961779	0.0215848	1.52	specific
YDR099W	BMH2	1	1	190201	BMH2_a_1_1	gfp	14	237300	6.9	164000	271800	-0.0884593	0.0136827	0.65	specific
YDR099W	BMH2	1	1	190201	BMH2_a_1_1	gfp	15	163000	7.01	132400	193100	-0.106443	-0.0268532	1.27	specific
YDR099W	BMH2	1	1	190201	BMH2_a_1_1	gfp	15	564700	13.4	547500	587100	-0.152461	0.0238708	0.61	specific
YDR099W	BMH2	1	1	190201	BMH2_a_1_1	mch	2	21300	3.56	0	44000	-4.28473e-05	0.00126319	0.81	specific
YDR099W	BMH2	1	1	190201	BMH2_a_1_1	mch	4	187200	3.42	53900	237400	-0.0835419	-0.0974484	4.93	shared
YDR099W	BMH2	1	1	190201	BMH2_a_1_1	mch	10	459400	3.31	405700	524200	0.0642969	0.0101551	0.41	specific
YDR099W	BMH2	1	1	190201	BMH2_a_1_1	mch	12	684400	7.81	650300	756100	-0.116938	0.0561672	2.63	specific
YDR099W	BMH2	1	1	190201	BMH2_a_1_1	mch	13	55800	3.76	0	104000	-0.0552211	0.0660841	2.07	specific
YDR099W	BMH2	1	1	190201	BMH2_a_1_1	mch	13	289900	3.29	247500	377400	0.0570542	0.090401	5.11	shared
YDR099W	BMH2	1	1	190201	BMH2_a_1_1	mch	14	466400	52.33	450000	480400	0.306311	0.0468326	1.21	specific
YLR286C	CTS1	1	1	190201	CTS1_a_1_1	gfp	8	141600	4.44	70000	210600	-0.0999844	-0.0932986	5.38	shared
YLR286C	CTS1	1	1	190201	CTS1_a_1_1	gfp	13	72000	20.7	22100	99400	0.194335	-0.00829382	0.7	specific
YLR286C	CTS1	1	1	190201	CTS1_a_1_1	gfp	14	456300	4.78	424500	489500	-0.073178	0.145038	12.67	opposite_direction
YLR286C	CTS1	1	1	190201	CTS1_a_1_1	gfp	15	43800	4.35	0	169500	0.0912968	0.00441213	0.53	specific
YLR286C	CTS1	1	1	190201	CTS1_a_1_1	mch	2	620500	3.04	417600	689200	-0.0796195	0.0325408	0.84	specific
YLR286C	CTS1	1	1	190201	CTS1_a_1_1	mch	5	193500	3.83	89600	327200	-0.0849358	0.0175724	0.51	specific
YLR286C	CTS1	1	1	190201	CTS1_a_1_1	mch	8	86500	8.92	56100	127600	-0.132509	-0.0804531	3.23	shared
YLR286C	CTS1	1	1	190201	CTS1_a_1_1	mch	10	388300	3.11	103100	490100	0.076147	0.0152146	0.93	specific
YLR286C	CTS1	1	1	190201	CTS1_a_1_1	mch	11	400300	3.3	184700	504400	-0.0490437	-0.0370619	1.73	specific
YLR286C	CTS1	1	1	190201	CTS1_a_1_1	mch	14	470700	12.89	435600	517200	0.141954	-0.0713145	4.19	opposite_direction
YLR286C	CTS1	2	1	190201	CTS1_a_2_1	gfp	4	1393000	3.99	1310800	1508900	-0.0799681	-0.0298219	1.24	specific
YLR286C	CTS1	2	1	190201	CTS1_a_2_1	gfp	10	377400	5.76	290700	407000	0.0665925	0.0775678	4.28	shared
YLR286C	CTS1	2	1	190201	CTS1_a_2_1	gfp	13	56800	7.93	0	108700	0.115192	-0.0932636	6.2	opposite_direction
YLR286C	CTS1	2	1	190201	CTS1_a_2_1	mch	2	0	3.25	0	83300	-0.139194	0.0214891	0.51	specific
YLR286C	CTS1	2	1	190201	CTS1_a_2_1	mch	2	571800	3.51	506000	691700	-0.0809478	-0.0252042	0.47	specific
YLR286C	CTS1	2	1	190201	CTS1_a_2_1	mch	4	156100	5.53	88300	192300	-0.0892115	0.0196825	0.97	specific
YLR286C	CTS1	2	1	190201	CTS1_a_2_1	mch	4	1316300	3.89	1113700	1377900	-0.0678894	-0.0538417	2.1	specific
YLR286C	CTS1	2	1	190201	CTS1_a_2_1	mch	5	331400	5.86	291300	362400	-0.114502	0.00692208	0.42	specific
YLR286C	CTS1	2	1	190201	CTS1_a_2_1	mch	7	905300	4.39	803100	945300	-0.0789517	-0.0171976	0.63	specific
YLR286C	CTS1	2	1	190201	CTS1_a_2_1	mch	10	374400	4.36	272400	412200	0.0786401	0.0677206	5.64	shared
YLR286C	CTS1	2	1	190201	CTS1_a_2_1	mch	11	222800	4.37	102400	296900	-0.0778207	-0.0013411	0.47	specific
YLR286C	CTS1	2	1	190201	CTS1_a_2_1	mch	13	68900	6.28	0	105700	-0.0967076	0.112888	7.63	opposite_direction
YLR286C	CTS1	2	1	190201	CTS1_a_2_1	mch	14	462700	24.27	449100	495900	0.187423	0.00216935	0.5	specific
YJR048W	CYC1	1	1	190201	CYC1_a_1_1	gfp	4	167700	3.11	116200	326200	-0.0731187	-0.0597665	3.07	shared
YJR048W	CYC1	1	1	190201	CYC1_a_1_1	gfp	5	400800	7.92	363300	504900	-0.109602	-0.0415912	2.53	specific
YJR048W	CYC1	1	1	190201	CYC1_a_1_1	gfp	10	197600	3.72	137300	266500	0.0664813	0.0119928	0.47	specific
YJR048W	CYC1	1	1	190201	CYC1_a_1_1	gfp	11	162600	11.68	133600	230200	-0.123138	-0.0919905	7.51	shared
YJR048W	CYC1	1	1	190201	CYC1_a_1_1	gfp	12	657400	318.2	650800	666500	-0.940187	-0.542322	142.8	shared
YJR048W	CYC1	1	1	190201	CYC1_a_1_1	gfp	13	356400	14.23	312100	423200	0.146059	0.0492799	3.46	shared
YJR048W	CYC1	1	1	190201	CYC1_a_1_1	gfp	14	208800	3.54	115800	342300	-0.0834927	-0.025411	0.4	specific
YJR048W	CYC1	1	1	190201	CYC1_a_1_1	gfp	15	119600	14.98	85900	159600	-0.164732	-0.0712684	4.08	shared
YJR048W	CYC1	1	1	190201	CYC1_a_1_1	mch	2	655200	3.84	466900	712800	-0.0692331	0.029038	0.65	specific
YJR048W	CYC1	1	1	190201	CYC1_a_1_1	mch	4	107800	4.11	0	278900	-0.071708	-0.0154217	0.84	specific
YJR048W	CYC1	1	1	190201	CYC1_a_1_1	mch	4	1321500	3.3	1259400	1381200	-0.0749302	-0.00769469	0.43	specific
YJR048W	CYC1	1	1	190201	CYC1_a_1_1	mch	11	253300	9.34	159500	307000	-0.118759	-0.111248	8.7	shared
YJR048W	CYC1	1	1	190201	CYC1_a_1_1	mch	12	671700	144.17	654300	685600	-0.536916	-0.898766	312.72	shared
YJR048W	CYC1	1	1	190201	CYC1_a_1_1	mch	13	54300	8.06	0	79300	-0.113234	0.0792987	5.38	opposite_direction
YJR048W	CYC1	1	1	190201	CYC1_a_1_1	mch	13	281600	4.26	245600	470300	0.100694	0.0993808	9.57	shared
YJR048W	CYC1	1	1	190201	CYC1_a_1_1	mch	14	469600	44.36	442900	488500	0.297655	0.0799285	2.53	specific
YJR048W	CYC1	1	1	190201	CYC1_a_1_1	mch	15	151900	4.5	0	229900	-0.0747995	-0.154227	14.18	shared
YJR048W	CYC1	2	1	190201	CYC1_a_2_1	gfp	5	394100	6.58	357200	454500	-0.106193	-0.0185454	1.19	specific
YJR048W	CYC1	2	1	190201	CYC1_a_2_1	gfp	7	371400	4.01	315600	413200	0.0946228	0.00935136	0.4	specific
YJR048W	CYC1	2	1	190201	CYC1_a_2_1	gfp	11	216000	5.56	141600	297600	-0.0736747	-0.0811221	2.74	specific
YJR048W	CYC1	2	1	190201	CYC1_a_2_1	gfp	12	666300	301.07	655600	674300	-0.92464	-0.532784	156.56	shared
YJR048W	CYC1	2	1	190201	CYC1_a_2_1	gfp	13	381700	7.38	312400	436800	0.130607	0.0650336	3.24	shared
YJR048W	CYC1	2	1	190201	CYC1_a_2_1	gfp	15	160000	12.7	134600	184400	-0.146003	-0.0479765	2.01	specific
YJR048W	CYC1	2	1	190201	CYC1_a_2_1	mch	2	586200	4.23	535800	636000	-0.0858505	-0.0336982	0.98	specific
YJR048W	CYC1	2	1	190201	CYC1_a_2_1	mch	4	228800	4.6	156400	321800	-0.0967876	-0.0544291	2.49	specific
YJR048W	CYC1	2	1	190201	CYC1_a_2_1	mch	12	666800	156.57	651700	674900	-0.532281	-0.922409	301.06	shared
YJR048W	CYC1	2	1	190201	CYC1_a_2_1	mch	13	63800	6.02	0	91700	-0.0945494	0.0672021	3.3	opposite_direction
YJR048W	CYC1	2	1	190201	CYC1_a_2_1	mch	13	363400	3.96	288900	430200	0.0798411	0.12398	6.94	shared
YJR048W	CYC1	2	1	190201	CYC1_a_2_1	mch	14	458500	33.52	443400	482000	0.250664	0.0292294	0.69	specific
YDL022W	GPD1	0	1	180515	GPD1_a_0_1	gfp	2	364600	8.11	335800	422200	-0.137172	-0.0724153	4.04	shared
YDL022W	GPD1	0	1	180515	GPD1_a_0_1	gfp	4	97800	6.22	48900	143300	-0.087497	-0.0713906	4.26	shared
YDL022W	GPD1	0	1	180515	GPD1_a_0_1	gfp	4	1124100	7.2	1063400	1176900	0.116634	-0.0170931	0.43	specific
YDL022W	GPD1	0	1	180515	GPD1_a_0_1	gfp	5	376700	4.47	313500	409500	0.129231	-0.0196249	3.58	opposite_direction
YDL022W	GPD1	0	1	180515	GPD1_a_0_1	gfp	5	557100	4.3	508700	566500	-0.112609	-0.24659	33.18	shared
YDL022W	GPD1	0	1	180515	GPD1_a_0_1	gfp	7	198200	9.37	101700	237200	0.122708	-0.033412	0.54	specific
YDL022W	GPD1	0	1	180515	GPD1_a_0_1	gfp	8	335700	3.76	222200	411000	-0.084749	-0.0547488	3.29	shared
YDL022W	GPD1	0	1	180515	GPD1_a_0_1	gfp	10	157600	184.94	149400	167500	-0.637853	-0.0590931	2.11	specific
YDL022W	GPD1	0	1	180515	GPD1_a_0_1	gfp	10	699800	5.04	657200	741700	0.103822	-0.097771	5.96	opposite_direction
YDL022W	GPD1	0	1	180515	GPD1_a_0_1	gfp	11	260000	25.22	234900	299200	-0.207825	-0.0241423	1.54	specific
YDL022W	GPD1	0	1	180515	GPD1_a_0_1	gfp	12	912200	8.16	852000	957800	0.107196	0.0571661	1.48	specific
YDL022W	GPD1	0	1	180515	GPD1_a_0_1	gfp	13	235100	15.73	132300	270200	0.163006	0.0169371	0.58	specific
YDL022W	GPD1	0	1	180515	GPD1_a_0_1	gfp	14	534600	11.29	496400	580000	0.13802	0.297012	55.17	shared
YDL022W	GPD1	0	1	180515	GPD1_a_0_1	gfp	15	169100	3.21	85600	225800	-0.0851437	-0.0316092	0.83	specific
YDL022W	GPD1	0	1	180515	GPD1_a_0_1	gfp	15	746200	6.42	679100	854900	-0.0903688	-0.0107088	0.46	specific
YDL022W	GPD1	0	1	180515	GPD1_a_0_1	mch	2	574500	10.53	528900	643600	-0.136493	-0.0108117	0.55	specific
YDL022W	GPD1	0	1	180515	GPD1_a_0_1	mch	4	66100	4.81	0	140900	-0.0812953	-0.0842803	4.78	shared
YDL022W	GPD1	0	1	180515	GPD1_a_0_1	mch	5	508100	46.79	500200	521200	-0.26128	-0.0549209	2.26	specific
YDL022W	GPD1	0	1	180515	GPD1_a_0_1	mch	8	123800	5.46	65900	166100	-0.111601	0.00637884	0.4	specific
YDL022W	GPD1	0	1	180515	GPD1_a_0_1	mch	8	289000	5.88	242100	328900	-0.0870508	-0.0938889	2.62	specific
YDL022W	GPD1	0	1	180515	GPD1_a_0_1	mch	10	664400	6.14	611800	741700	-0.0921463	0.0861946	3.6	opposite_direction
YDL022W	GPD1	0	1	180515	GPD1_a_0_1	mch	11	419100	4.38	304700	473400	-0.0794595	-0.0920922	7.25	shared
YDL022W	GPD1	0	1	180515	GPD1_a_0_1	mch	12	671100	12.13	641600	725800	-0.16365	0.0790499	2.84	specific
YDL022W	GPD1	0	1	180515	GPD1_a_0_1	mch	13	67600	3.97	0	109000	-0.0830346	0.119769	9.52	opposite_direction
YDL022W	GPD1	0	1	180515	GPD1_a_0_1	mch	14	475500	72.87	461700	496200	0.35212	0.106308	8.24	shared
YDL022W	GPD1	0	1	180515	GPD1_a_0_1	mch	16	265500	3.38	175300	319000	0.0842991	-0.0381588	0.82	specific
YDL022W	GPD1	1	1	190201	GPD1_a_1_1	gfp	2	442300	15.74	420100	460500	-0.181798	-0.0184508	0.9	specific
YDL022W	GPD1	1	1	190201	GPD1_a_1_1	gfp	4	185100	7.06	151300	327000	-0.130417	-0.0785076	3.14	shared
YDL022W	GPD1	1	1	190201	GPD1_a_1_1	gfp	5	386500	22.2	371700	443300	0.180008	-0.0939079	11.65	opposite_direction
YDL022W	GPD1	1	1	190201	GPD1_a_1_1	gfp	8	363600	5.77	316700	554900	-0.100413	0.00200166	0.4	specific
YDL022W	GPD1	1	1	190201	GPD1_a_1_1	gfp	10	157300	70.83	145300	169900	-0.373052	0.0556455	2.03	specific
YDL022W	GPD1	1	1	190201	GPD1_a_1_1	gfp	10	659700	15.61	610600	701900	0.155611	0.0175945	0.4	specific
YDL022W	GPD1	1	1	190201	GPD1_a_1_1	gfp	11	277200	32.29	261600	300400	-0.254964	-0.0269199	0.64	specific
YDL022W	GPD1	1	1	190201	GPD1_a_1_1	gfp	12	210500	4.8	119200	364900	-0.0917379	-0.0347584	0.86	specific
YDL022W	GPD1	1	1	190201	GPD1_a_1_1	gfp	12	702200	19.75	671400	721600	0.169021	-0.188608	23.49	opposite_direction
YDL022W	GPD1	1	1	190201	GPD1_a_1_1	gfp	13	240200	12.5	203500	297700	0.150343	0.0764282	2.52	specific
YDL022W	GPD1	1	1	190201	GPD1_a_1_1	gfp	14	524300	12.57	487300	543700	0.14625	0.275698	45.11	shared
YDL022W	GPD1	1	1	190201	GPD1_a_1_1	mch	4	186300	3.15	81500	304600	-0.0784837	-0.129217	7.05	shared
YDL022W	GPD1	1	1	190201	GPD1_a_1_1	mch	5	511400	56.18	499600	526400	-0.309812	0.157871	17.09	opposite_direction
YDL022W	GPD1	1	1	190201	GPD1_a_1_1	mch	6	231100	4.45	169300	270000	-0.0814794	-0.0485916	1.74	specific
YDL022W	GPD1	1	1	190201	GPD1_a_1_1	mch	12	665400	24.47	651300	717800	-0.218598	0.154764	16.73	opposite_direction
YDL022W	GPD1	1	1	190201	GPD1_a_1_1	mch	13	1100	4.54	0	76100	-0.160651	-0.069065	0.62	specific
YDL022W	GPD1	1	1	190201	GPD1_a_1_1	mch	13	297200	4.98	247600	375700	0.101724	0.113332	10.52	shared
YDL022W	GPD1	1	1	190201	GPD1_a_1_1	mch	14	476000	53.48	453700	499600	0.304974	0.127181	9.06	shared
YDL022W	GPD1	1	1	190201	GPD1_a_1_1	mch	15	623300	5.05	563000	708200	-0.0902619	-0.0265984	0.52	specific
YDL022W	GPD1	1	1	190201	GPD1_a_1_1	mch	15	1031800	3.54	938400	1074300	-0.0828792	0.0136183	0.48	specific
YDL022W	GPD1	1	2	190201	GPD1_a_1_2	gfp	2	399700	14.52	369100	430700	-0.146273	-0.0415537	1.72	specific
YDL022W	GPD1	1	2	190201	GPD1_a_1_2	gfp	4	215100	10.68	174900	250500	-0.123691	-0.0709616	3.94	shared
YDL022W	GPD1	1	2	190201	GPD1_a_1_2	gfp	5	325100	14.69	279900	405900	0.16752	-0.0954384	8.55	opposite_direction
YDL022W	GPD1	1	2	190201	GPD1_a_1_2	gfp	8	461800	3.71	389400	554900	-0.0663683	-0.0322283	0.89	specific
YDL022W	GPD1	1	2	190201	GPD1_a_1_2	gfp	10	153300	66.05	142200	167100	-0.345897	0.0312797	0.76	specific
YDL022W	GPD1	1	2	190201	GPD1_a_1_2	gfp	10	637400	11.33	607900	661600	0.161792	0.00389978	0.4	specific
YDL022W	GPD1	1	2	190201	GPD1_a_1_2	gfp	11	256700	23.2	238000	292700	-0.192137	-0.0340211	1.18	specific
YDL022W	GPD1	1	2	190201	GPD1_a_1_2	gfp	12	206900	3.96	144900	390100	-0.0600223	-0.0236739	0.68	specific
YDL022W	GPD1	1	2	190201	GPD1_a_1_2	gfp	12	661700	11.66	607700	700400	0.142916	-0.198372	22.71	opposite_direction
YDL022W	GPD1	1	2	190201	GPD1_a_1_2	gfp	13	310000	12.88	253600	349400	0.149918	0.0490276	1.76	specific
YDL022W	GPD1	1	2	190201	GPD1_a_1_2	gfp	14	595800	8.2	488100	625200	0.110537	0.16974	23.7	shared
YDL022W	GPD1	1	2	190201	GPD1_a_1_2	gfp	15	123200	6.81	78000	165600	-0.107428	-0.0594053	1.77	specific
YDL022W	GPD1	1	2	190201	GPD1_a_1_2	gfp	15	821500	3.13	498800	892600	-0.054863	-0.0548784	2.26	specific
YDL022W	GPD1	1	2	190201	GPD1_a_1_2	mch	2	596900	4.79	537800	641500	-0.0753399	-0.0147078	0.88	specific
YDL022W	GPD1	1	2	190201	GPD1_a_1_2	mch	4	156900	5.16	87600	253000	-0.0882516	-0.102115	7.14	shared
YDL022W	GPD1	1	2	190201	GPD1_a_1_2	mch	5	516400	51.21	503400	532900	-0.286326	0.0972263	8.2	opposite_direction
YDL022W	GPD1	1	2	190201	GPD1_a_1_2	mch	8	100800	3.68	27500	144900	-0.100205	-0.00249986	0.74	specific
YDL022W	GPD1	1	2	190201	GPD1_a_1_2	mch	9	182400	4.16	79600	247900	0.082743	0.0169164	0.4	specific
YDL022W	GPD1	1	2	190201	GPD1_a_1_2	mch	10	377000	4.86	269900	444200	0.0811642	0.00647704	0.44	specific
YDL022W	GPD1	1	2	190201	GPD1_a_1_2	mch	12	684300	24.82	662400	698400	-0.206387	0.131984	10.7	opposite_direction
YDL022W	GPD1	1	2	190201	GPD1_a_1_2	mch	13	39000	3.93	0	121100	-0.073856	0.0603186	2.13	specific
YDL022W	GPD1	1	2	190201	GPD1_a_1_2	mch	14	464000	61.79	450900	481600	0.331956	0.0953324	5.5	shared
YDL022W	GPD1	1	2	190201	GPD1_a_1_2	mch	15	691900	6.5	637400	748300	-0.0787094	-0.0583277	2.21	specific
YDL022W	GPD1	2	1	190201	GPD1_a_2_1	gfp	2	446300	5.85	195400	495600	-0.0887389	-0.0301417	1.07	specific
YDL022W	GPD1	2	1	190201	GPD1_a_2_1	gfp	4	231100	10.52	194500	262600	-0.135201	-0.0735262	3.07	shared
YDL022W	GPD1	2	1	190201	GPD1_a_2_1	gfp	4	1095500	7.84	1070700	1153300	0.0921549	0.00718489	0.4	specific
YDL022W	GPD1	2	1	190201	GPD1_a_2_1	gfp	5	358700	14.02	329200	409200	0.152737	-0.0422002	4.6	opposite_direction
YDL022W	GPD1	2	1	190201	GPD1_a_2_1	gfp	7	143300	3.33	72900	230500	0.0644565	-0.0176864	0.4	specific
YDL022W	GPD1	2	1	190201	GPD1_a_2_1	gfp	8	386000	3.94	308300	446700	-0.07016	-0.0330673	0.86	specific
YDL022W	GPD1	2	1	190201	GPD1_a_2_1	gfp	10	148300	91.56	139300	159800	-0.439438	0.0349168	2.11	specific
YDL022W	GPD1	2	1	190201	GPD1_a_2_1	gfp	10	668800	12.43	641400	698900	0.133722	-0.0500229	1.09	specific
YDL022W	GPD1	2	1	190201	GPD1_a_2_1	gfp	11	286500	23.09	256100	328400	-0.207482	-0.0688185	2.43	specific
YDL022W	GPD1	2	1	190201	GPD1_a_2_1	gfp	12	678400	14.55	650200	725300	0.16543	-0.136855	12.23	opposite_direction
YDL022W	GPD1	2	1	190201	GPD1_a_2_1	gfp	13	220700	18.98	195900	271000	0.158202	0.0620097	0.88	specific
YDL022W	GPD1	2	1	190201	GPD1_a_2_1	gfp	14	520800	9.32	492000	561100	0.132283	0.319761	55.67	shared
YDL022W	GPD1	2	1	190201	GPD1_a_2_1	gfp	15	500100	4.23	418800	590700	-0.0576951	-0.0513055	2.01	specific
YDL022W	GPD1	2	1	190201	GPD1_a_2_1	gfp	16	252400	3.95	160900	293800	-0.0716076	0.0191005	0.43	specific
YDL022W	GPD1	2	1	190201	GPD1_a_2_1	mch	4	215600	3.13	0	283100	-0.0716323	-0.131993	10.23	shared
YDL022W	GPD1	2	1	190201	GPD1_a_2_1	mch	5	118200	3.18	74400	153800	0.0181311	0.0291485	0.7	specific
YDL022W	GPD1	2	1	190201	GPD1_a_2_1	mch	5	516000	45.58	501100	533300	-0.296128	0.0886488	4.85	opposite_direction
YDL022W	GPD1	2	1	190201	GPD1_a_2_1	mch	8	125700	6.65	76600	155400	-0.111442	0.0360547	0.55	specific
YDL022W	GPD1	2	1	190201	GPD1_a_2_1	mch	10	315900	3.8	250500	443700	0.0754361	0.0155906	0.41	specific
YDL022W	GPD1	2	1	190201	GPD1_a_2_1	mch	12	711600	13.4	661100	737900	-0.133296	0.133904	13.7	opposite_direction
YDL022W	GPD1	2	1	190201	GPD1_a_2_1	mch	13	35500	5.56	0	102800	-0.0970781	0.0288869	1.72	specific
YDL022W	GPD1	2	1	190201	GPD1_a_2_1	mch	14	471200	69.12	449700	487700	0.34435	0.0939948	4.61	shared
YDL022W	GPD1	2	1	190201	GPD1_a_2_1	mch	15	678700	5.91	627500	754600	-0.0992429	-0.0315659	1.52	specific
YDL022W	GPD1	3	1	190201	GPD1_a_3_1	gfp	2	452800	11.67	386700	473000	-0.123152	-0.0366169	0.73	specific
YDL022W	GPD1	3	1	190201	GPD1_a_3_1	gfp	4	215600	5.48	179200	270700	-0.112846	-0.0585608	3.28	shared
YDL022W	GPD1	3	1	190201	GPD1_a_3_1	gfp	5	414600	23.64	388700	462100	0.176772	-0.0751802	7.41	opposite_direction
YDL022W	GPD1	3	1	190201	GPD1_a_3_1	gfp	8	321700	4.15	199300	410800	-0.0926559	-0.0593586	2.79	specific
YDL022W	GPD1	3	1	190201	GPD1_a_3_1	gfp	10	154200	58.8	143600	168800	-0.349877	0.0484881	1.58	specific
YDL022W	GPD1	3	1	190201	GPD1_a_3_1	gfp	10	638200	7.35	574400	688600	0.115981	0.00398714	0.41	specific
YDL022W	GPD1	3	1	190201	GPD1_a_3_1	gfp	11	247300	20.03	223700	310600	-0.182184	-0.015769	0.69	specific
YDL022W	GPD1	3	1	190201	GPD1_a_3_1	gfp	12	346500	6.41	273000	375700	-0.109626	-0.0139664	0.76	specific
YDL022W	GPD1	3	1	190201	GPD1_a_3_1	gfp	12	677400	19.78	637300	698600	0.154924	-0.148799	12.58	opposite_direction
YDL022W	GPD1	3	1	190201	GPD1_a_3_1	gfp	12	952300	8.48	903800	986500	0.120781	0.0238482	0.79	specific
YDL022W	GPD1	3	1	190201	GPD1_a_3_1	gfp	13	243100	11.07	187900	275600	0.128634	0.0395325	1.04	specific
YDL022W	GPD1	3	1	190201	GPD1_a_3_1	gfp	14	468300	7.32	374000	575600	0.093827	0.255896	35	shared
YDL022W	GPD1	3	1	190201	GPD1_a_3_1	gfp	15	179400	8.21	132700	214900	-0.11834	-0.0969205	4.4	shared
YDL022W	GPD1	3	1	190201	GPD1_a_3_1	mch	4	172800	4.38	132800	233100	-0.0949767	-0.071333	3.1	shared
YDL022W	GPD1	3	1	190201	GPD1_a_3_1	mch	5	513700	38.78	501700	531600	-0.243722	0.164239	18.3	opposite_direction
YDL022W	GPD1	3	1	190201	GPD1_a_3_1	mch	8	83300	9.59	62300	106300	-0.17095	0.0311702	0.4	specific
YDL022W	GPD1	3	1	190201	GPD1_a_3_1	mch	10	414200	3.93	329600	471200	0.0930677	0.0452053	1.84	specific
YDL022W	GPD1	3	1	190201	GPD1_a_3_1	mch	11	537300	3.03	335600	599500	-0.0761903	0.0210852	0.45	specific
YDL022W	GPD1	3	1	190201	GPD1_a_3_1	mch	12	728600	12.86	647500	788300	-0.157207	0.138845	16.8	opposite_direction
YDL022W	GPD1	3	1	190201	GPD1_a_3_1	mch	13	75900	3.25	0	149900	-0.0653559	0.0366615	1.38	specific
YDL022W	GPD1	3	1	190201	GPD1_a_3_1	mch	13	372200	4.7	295000	462900	0.105673	0.0966285	6.74	shared
YDL022W	GPD1	3	1	190201	GPD1_a_3_1	mch	13	701000	3.88	611700	761300	0.0767705	0.0356854	0.84	specific
YDL022W	GPD1	3	1	190201	GPD1_a_3_1	mch	14	476000	35.28	453100	495900	0.254517	0.0935546	7.24	shared
YDL022W	GPD1	3	1	190201	GPD1_a_3_1	mch	15	134900	5.64	76500	205900	-0.111416	-0.100961	6.39	shared
YDL022W	GPD1	4	1	190201	GPD1_a_4_1	gfp	2	395200	14.27	380000	449800	-0.148897	-0.0189924	0.61	specific
YDL022W	GPD1	4	1	190201	GPD1_a_4_1	gfp	4	193900	7.86	159000	222400	-0.147686	-0.0203874	0.7	specific
YDL022W	GPD1	4	1	190201	GPD1_a_4_1	gfp	5	434300	19.83	406500	459200	0.165573	-0.140131	12.85	opposite_direction
YDL022W	GPD1	4	1	190201	GPD1_a_4_1	gfp	7	142400	3.04	107500	247000	0.0723565	0.0135879	0.43	specific
YDL022W	GPD1	4	1	190201	GPD1_a_4_1	gfp	8	405200	7.55	379700	461000	-0.103856	-0.0466216	1.98	specific
YDL022W	GPD1	4	1	190201	GPD1_a_4_1	gfp	10	153400	95.15	144100	162500	-0.441254	0.0340125	0.85	specific
YDL022W	GPD1	4	1	190201	GPD1_a_4_1	gfp	10	662500	21.35	640400	690500	0.184254	-0.0244505	0.4	specific
YDL022W	GPD1	4	1	190201	GPD1_a_4_1	gfp	11	283300	31.17	248800	308700	-0.234989	-0.0306352	1.87	specific
YDL022W	GPD1	4	1	190201	GPD1_a_4_1	gfp	12	256500	7.03	204300	361800	-0.107786	-0.0130195	0.41	specific
YDL022W	GPD1	4	1	190201	GPD1_a_4_1	gfp	12	729900	13.2	675000	774800	0.145301	-0.123267	9.82	opposite_direction
YDL022W	GPD1	4	1	190201	GPD1_a_4_1	gfp	12	921000	10.16	881900	942100	0.136693	-0.01473	0.55	specific
YDL022W	GPD1	4	1	190201	GPD1_a_4_1	gfp	13	272900	16.3	241400	306800	0.177632	0.0331824	1.31	specific
YDL022W	GPD1	4	1	190201	GPD1_a_4_1	gfp	14	505000	5.38	471200	571900	0.0926348	0.287397	47.26	shared
YDL022W	GPD1	4	1	190201	GPD1_a_4_1	gfp	15	558100	3.61	483900	676700	-0.0433015	-0.0391056	1.12	specific
YDL022W	GPD1	4	1	190201	GPD1_a_4_1	gfp	16	193700	3.05	132800	586200	-0.0682101	0.00378206	0.64	specific
YDL022W	GPD1	4	1	190201	GPD1_a_4_1	mch	5	525700	44.7	509800	538000	-0.279607	0.133311	12.24	opposite_direction
YDL022W	GPD1	4	1	190201	GPD1_a_4_1	mch	8	113200	3.14	0	165400	-0.0785092	0.0395676	0.56	specific
YDL022W	GPD1	4	1	190201	GPD1_a_4_1	mch	11	427300	4.34	340100	493800	-0.0885529	-0.103624	9.44	shared
YDL022W	GPD1	4	1	190201	GPD1_a_4_1	mch	12	694900	11.73	657700	731400	-0.143082	0.141822	12.29	opposite_direction
YDL022W	GPD1	4	1	190201	GPD1_a_4_1	mch	13	1200	6.96	0	88200	-0.107716	0.0392999	2.07	specific
YDL022W	GPD1	4	1	190201	GPD1_a_4_1	mch	13	369500	3.35	299000	461100	0.0863063	0.114797	8.91	shared
YDL022W	GPD1	4	1	190201	GPD1_a_4_1	mch	14	474900	52.12	458300	494700	0.294986	0.0731202	3.75	shared
YDL022W	GPD1	4	1	190201	GPD1_a_4_1	mch	15	230500	3.47	140600	461300	-0.0612947	0.00676701	0.41	specific
YKR080W	MTD1	0	1	180529	MTD1_a_0_1	gfp	2	138300	3.74	59200	368700	-0.0832893	-0.013263	0.4	specific
YKR080W	MTD1	0	1	180529	MTD1_a_0_1	gfp	5	378400	3.15	324800	566500	-0.0593243	-0.0435302	1.21	specific
YKR080W	MTD1	0	1	180529	MTD1_a_0_1	gfp	7	391900	7.08	345200	445600	0.113097	0.0184515	0.83	specific
YKR080W	MTD1	0	1	180529	MTD1_a_0_1	gfp	8	175900	17.03	156000	197400	-0.168088	-0.111341	7.86	shared
YKR080W	MTD1	0	1	180529	MTD1_a_0_1	gfp	10	157600	14.18	129000	179000	0.161331	0.143642	12.61	shared
YKR080W	MTD1	0	1	180529	MTD1_a_0_1	gfp	11	219000	5.3	100200	289800	-0.0946641	-0.0327293	0.72	specific
YKR080W	MTD1	0	1	180529	MTD1_a_0_1	gfp	12	653800	5.15	621800	691600	-0.1045	-0.0551367	1.81	specific
YKR080W	MTD1	0	1	180529	MTD1_a_0_1	gfp	13	118800	44.19	103100	155900	0.277363	-0.0404239	2.14	specific
YKR080W	MTD1	0	1	180529	MTD1_a_0_1	gfp	14	219800	42.75	196100	237800	-0.27558	-0.0463405	0.66	specific
YKR080W	MTD1	0	1	180529	MTD1_a_0_1	gfp	15	410000	3.6	314100	565700	-0.0733863	0.0157456	0.63	specific
YKR080W	MTD1	0	1	180529	MTD1_a_0_1	gfp	15	758300	8.42	716300	792800	0.122196	-0.0347453	0.77	specific
YKR080W	MTD1	0	1	180529	MTD1_a_0_1	mch	2	575400	12.11	529700	614500	-0.148104	0.0439254	0.74	specific
YKR080W	MTD1	0	1	180529	MTD1_a_0_1	mch	8	112800	12.93	78100	135300	-0.111615	-0.109054	7.96	shared
YKR080W	MTD1	0	1	180529	MTD1_a_0_1	mch	10	123200	16	99200	147200	0.166272	0.140893	11.57	shared
YKR080W	MTD1	0	1	180529	MTD1_a_0_1	mch	13	405000	3.29	355900	489200	0.0630193	0.0774738	5.01	shared
YKR080W	MTD1	0	1	180529	MTD1_a_0_1	mch	14	465700	54.51	453400	476800	0.314234	-0.0605232	3.68	opposite_direction
YKR080W	MTD1	0	1	180529	MTD1_a_0_1	mch	15	556000	4.28	510800	593800	0.0848601	-0.0489132	2.11	specific
YKR080W	MTD1	1	1	190201	MTD1_a_1_1	gfp	2	93700	3.02	0	155100	-0.0699401	0.007593	0.42	specific
YKR080W	MTD1	1	1	190201	MTD1_a_1_1	gfp	4	1444900	3.16	1345400	1522200	-0.0627914	-0.0339168	1.4	specific
YKR080W	MTD1	1	1	190201	MTD1_a_1_1	gfp	5	477600	3.13	337700	566500	-0.0739461	0.00730733	0.43	specific
YKR080W	MTD1	1	1	190201	MTD1_a_1_1	gfp	7	530100	5.08	371700	585700	0.0839576	0.00890196	0.63	specific
YKR080W	MTD1	1	1	190201	MTD1_a_1_1	gfp	7	899600	3.37	847100	1081000	-0.0719914	0.00657468	0.58	specific
YKR080W	MTD1	1	1	190201	MTD1_a_1_1	gfp	8	176800	9.27	151500	250300	-0.115857	-0.0797593	4.86	shared
YKR080W	MTD1	1	1	190201	MTD1_a_1_1	gfp	10	205500	5.56	92900	250500	0.0955368	0.0815581	7.17	shared
YKR080W	MTD1	1	1	190201	MTD1_a_1_1	gfp	12	612300	4.43	547400	782400	0.0922547	-0.0454675	2.01	specific
YKR080W	MTD1	1	1	190201	MTD1_a_1_1	gfp	13	155000	35.01	136400	168100	0.243864	-0.030895	0.98	specific
YKR080W	MTD1	1	1	190201	MTD1_a_1_1	gfp	13	885600	5.08	815500	922700	0.0890106	0.0578604	2.53	specific
YKR080W	MTD1	1	1	190201	MTD1_a_1_1	gfp	14	181600	20.05	151600	232700	-0.199512	-0.0274075	0.44	specific
YKR080W	MTD1	1	1	190201	MTD1_a_1_1	gfp	15	726300	3.07	666700	848600	0.0801165	-0.0630614	2.46	specific
YKR080W	MTD1	1	1	190201	MTD1_a_1_1	mch	2	566500	5.18	527600	647600	-0.109652	-0.00716136	0.4	specific
YKR080W	MTD1	1	1	190201	MTD1_a_1_1	mch	4	1302000	4.14	1227300	1393200	-0.0472627	-0.00666039	0.61	specific
YKR080W	MTD1	1	1	190201	MTD1_a_1_1	mch	7	328500	3.68	261700	392900	0.101398	0.0538363	2.05	specific
YKR080W	MTD1	1	1	190201	MTD1_a_1_1	mch	8	112800	7.28	73900	148900	-0.111996	-0.0550848	4.44	shared
YKR080W	MTD1	1	1	190201	MTD1_a_1_1	mch	10	143400	8.15	99400	297100	0.142791	0.0849313	4.83	shared
YKR080W	MTD1	1	1	190201	MTD1_a_1_1	mch	11	195000	3.83	100600	470800	-0.0686293	-0.0534053	1.5	specific
YKR080W	MTD1	1	1	190201	MTD1_a_1_1	mch	12	693300	5.08	640600	740800	-0.107359	0.0382161	3.49	opposite_direction
YKR080W	MTD1	1	1	190201	MTD1_a_1_1	mch	13	333500	3.83	234600	541200	0.051994	0.107146	10.15	shared
YKR080W	MTD1	1	1	190201	MTD1_a_1_1	mch	13	806500	4.06	671600	905300	0.0783789	0.0545191	2.98	specific
YKR080W	MTD1	1	1	190201	MTD1_a_1_1	mch	14	467800	23	431800	511700	0.216145	-0.048633	2.35	specific
YKR080W	MTD1	1	1	190201	MTD1_a_1_1	mch	15	366300	3.08	231600	479800	-0.0548152	-0.0440027	1.3	specific
YKR080W	MTD1	1	1	190201	MTD1_a_1_1	mch	15	773000	5.05	736700	839800	-0.08225	0.0639511	2.24	specific
YGL055W	OLE1	1	1	190201	OLE1_a_1_1	gfp	1	41700	35.09	0	55400	-0.3068	-0.0839674	2.67	specific
YGL055W	OLE1	1	1	190201	OLE1_a_1_1	gfp	8	292300	3.84	167000	392400	-0.0534526	0.0138327	0.42	specific
YGL055W	OLE1	1	1	190201	OLE1_a_1_1	gfp	11	325400	26.89	299800	350100	-0.20384	-0.0724564	3.35	shared
YGL055W	OLE1	1	1	190201	OLE1_a_1_1	gfp	12	659600	128.46	651900	673000	-0.498064	-0.178255	15.41	shared
YGL055W	OLE1	1	1	190201	OLE1_a_1_1	gfp	13	53500	6.49	0	107600	0.0893669	-0.0704326	1.83	specific
YGL055W	OLE1	1	1	190201	OLE1_a_1_1	gfp	13	409800	4.18	361000	485700	-0.0790117	0.0404843	1.6	specific
YGL055W	OLE1	1	1	190201	OLE1_a_1_1	gfp	15	542500	5.19	501400	663300	-0.0815221	0.0783342	3.61	opposite_direction
YGL055W	OLE1	1	1	190201	OLE1_a_1_1	mch	1	300	3.02	0	109200	-0.101885	-0.345497	33.83	shared
YGL055W	OLE1	1	1	190201	OLE1_a_1_1	mch	4	261300	3.76	98600	307300	-0.0509601	0.0112496	0.4	specific
YGL055W	OLE1	1	1	190201	OLE1_a_1_1	mch	5	376400	4.9	286200	433400	-0.0771857	0.00246742	0.4	specific
YGL055W	OLE1	1	1	190201	OLE1_a_1_1	mch	6	176300	3.1	129000	270000	-0.0724714	-0.038654	0.97	specific
YGL055W	OLE1	1	1	190201	OLE1_a_1_1	mch	10	327700	3.65	296400	469000	0.0650527	-0.023447	0.41	specific
YGL055W	OLE1	1	1	190201	OLE1_a_1_1	mch	11	135600	3.15	50400	206300	-0.0482884	-0.0827773	5.19	shared
YGL055W	OLE1	1	1	190201	OLE1_a_1_1	mch	11	442800	6.4	346600	465000	-0.0964117	-0.165357	16	shared
YGL055W	OLE1	1	1	190201	OLE1_a_1_1	mch	12	670600	15.77	639400	702300	-0.181259	-0.488527	127.25	shared
YGL055W	OLE1	1	1	190201	OLE1_a_1_1	mch	14	471800	26.96	452200	494200	0.203919	0.0202248	0.52	specific
YGL055W	OLE1	1	1	190201	OLE1_a_1_1	mch	15	535300	3.75	480800	589800	0.0816446	-0.0818513	4.97	opposite_direction
YGL055W	OLE1	2	1	190201	OLE1_a_2_1	gfp	1	45300	30.44	0	56900	-0.26383	-0.0100859	0.4	specific
YGL055W	OLE1	2	1	190201	OLE1_a_2_1	gfp	8	516000	3.39	432600	554900	-0.0556947	0.00647588	0.42	specific
YGL055W	OLE1	2	1	190201	OLE1_a_2_1	gfp	10	700200	5.59	641900	741700	0.102385	0.0426551	0.68	specific
YGL055W	OLE1	2	1	190201	OLE1_a_2_1	gfp	11	411000	12.95	390500	434200	-0.150837	-0.0589996	2.01	specific
YGL055W	OLE1	2	1	190201	OLE1_a_2_1	gfp	12	650600	9	620800	691500	-0.135085	-0.152417	13.95	shared
YGL055W	OLE1	2	1	190201	OLE1_a_2_1	gfp	13	71700	3.7	0	112500	0.0901488	-0.064564	3.65	opposite_direction
YGL055W	OLE1	2	1	190201	OLE1_a_2_1	gfp	13	369500	5.54	328800	447800	-0.077626	-0.0140515	0.4	specific
YGL055W	OLE1	2	1	190201	OLE1_a_2_1	gfp	15	601400	7.48	530900	630600	-0.103058	0.00566466	0.42	specific
YGL055W	OLE1	2	1	190201	OLE1_a_2_1	mch	2	632700	3.13	520800	714600	-0.0769866	-0.0267972	0.45	specific
YGL055W	OLE1	2	1	190201	OLE1_a_2_1	mch	12	693100	18.36	669700	720100	-0.177408	-0.100769	6.85	shared
YGL055W	OLE1	2	1	190201	OLE1_a_2_1	mch	13	47300	4.81	0	87100	-0.0693291	0.0829238	3.23	opposite_direction
YGL055W	OLE1	2	1	190201	OLE1_a_2_1	mch	14	459100	24.56	439700	486900	0.209959	-0.0425937	1.14	specific
YOR293W	RPS10A	1	1	190201	RPS10A_a_1_1	gfp	3	106400	8.78	69300	198900	0.047544	0.0363804	0.61	specific
YOR293W	RPS10A	1	1	190201	RPS10A_a_1_1	gfp	5	58100	5.2	1200	132400	0.0172861	-0.0430353	0.99	specific
YOR293W	RPS10A	1	1	190201	RPS10A_a_1_1	gfp	11	229900	4.35	75400	293800	-0.171844	-0.0926681	4.95	shared
YOR293W	RPS10A	1	1	190201	RPS10A_a_1_1	gfp	13	88000	22.38	68300	141100	0.188022	-0.0558486	1.87	specific
YOR293W	RPS10A	1	1	190201	RPS10A_a_1_1	gfp	14	217700	5.17	126400	329500	-0.0974573	0.0360241	2.14	specific
YOR293W	RPS10A	1	1	190201	RPS10A_a_1_1	gfp	15	138300	5.18	108300	181200	0.077189	0.0330904	1.69	specific
YOR293W	RPS10A	1	1	190201	RPS10A_a_1_1	gfp	15	785000	12.98	767700	818700	0.0809527	0.0344026	0.48	specific
YOR293W	RPS10A	1	1	190201	RPS10A_a_1_1	gfp	16	453100	3.04	398300	626800	-0.116712	-0.0283415	0.47	specific
YOR293W	RPS10A	1	1	190201	RPS10A_a_1_1	mch	2	609500	6.09	557200	656200	-0.103307	-0.0915136	1.77	specific
YOR293W	RPS10A	1	1	190201	RPS10A_a_1_1	mch	4	90300	6.56	57900	132500	-0.104817	-0.0355165	0.45	specific
YOR293W	RPS10A	1	1	190201	RPS10A_a_1_1	mch	4	926300	3.33	876700	1036500	0.0499419	-0.00202083	0.74	specific
YOR293W	RPS10A	1	1	190201	RPS10A_a_1_1	mch	10	520700	3.22	430700	632100	0.0643065	0.0192405	0.49	specific
YOR293W	RPS10A	1	1	190201	RPS10A_a_1_1	mch	11	213000	5.22	140600	299800	-0.0884233	-0.162799	3.97	shared
YOR293W	RPS10A	1	1	190201	RPS10A_a_1_1	mch	13	262700	6.07	224500	391200	0.111327	0.104052	7.92	shared
YOR293W	RPS10A	1	1	190201	RPS10A_a_1_1	mch	14	471000	32.43	442800	490900	0.231123	-0.059746	1.87	specific
YOR293W	RPS10A	1	1	190201	RPS10A_a_1_1	mch	16	198900	5.11	165100	249800	0.0867473	0.0768836	2.73	specific
YOR293W	RPS10A	2	1	190201	RPS10A_a_2_1	gfp	3	112600	15.57	88700	142100	0.182171	0.00582979	0.47	specific
YOR293W	RPS10A	2	1	190201	RPS10A_a_2_1	gfp	4	1368200	3.38	1159800	1488600	0.0716121	-0.0543499	1.57	specific
YOR293W	RPS10A	2	1	190201	RPS10A_a_2_1	gfp	5	62000	6.6	15000	135800	-0.113555	-0.141085	13.64	shared
YOR293W	RPS10A	2	1	190201	RPS10A_a_2_1	gfp	5	566100	6.81	541500	566500	-0.159006	-0.0386589	0.75	specific
YOR293W	RPS10A	2	1	190201	RPS10A_a_2_1	gfp	9	137000	6.79	102100	238700	0.111388	0.0928607	5.94	shared
YOR293W	RPS10A	2	1	190201	RPS10A_a_2_1	gfp	10	356700	3.81	223600	419400	-0.0752273	0.0291808	0.71	specific
YOR293W	RPS10A	2	1	190201	RPS10A_a_2_1	gfp	11	190700	3.13	70200	341300	-0.0744901	-0.0512508	1.61	specific
YOR293W	RPS10A	2	1	190201	RPS10A_a_2_1	gfp	12	797400	9.3	738100	834700	0.123978	-0.0491023	1.14	specific
YOR293W	RPS10A	2	1	190201	RPS10A_a_2_1	gfp	13	102400	17.52	77000	133800	0.180482	0.00161568	0.53	specific
YOR293W	RPS10A	2	1	190201	RPS10A_a_2_1	gfp	13	848100	8.99	741300	881900	-0.114292	-0.0426095	1.24	specific
YOR293W	RPS10A	2	1	190201	RPS10A_a_2_1	gfp	14	238400	8.16	205700	283100	-0.125449	0.059711	1.84	specific
YOR293W	RPS10A	2	1	190201	RPS10A_a_2_1	gfp	14	468400	12.8	432300	509900	-0.158812	0.0830678	4.2	opposite_direction
YOR293W	RPS10A	2	1	190201	RPS10A_a_2_1	gfp	15	156500	10.56	131000	178000	0.120979	0.0288032	0.64	specific
YOR293W	RPS10A	2	1	190201	RPS10A_a_2_1	gfp	15	868300	58.15	853800	879400	0.34226	0.0201518	0.81	specific
YOR293W	RPS10A	2	1	190201	RPS10A_a_2_1	mch	5	42500	17.51	32700	55100	-0.162308	-0.105262	6.45	shared
YOR293W	RPS10A	2	1	190201	RPS10A_a_2_1	mch	6	241900	6.66	214100	270000	-0.126885	-0.0473349	1.18	specific
YOR293W	RPS10A	2	1	190201	RPS10A_a_2_1	mch	7	252000	6.2	113000	303200	-0.103922	0.00466233	0.58	specific
YOR293W	RPS10A	2	1	190201	RPS10A_a_2_1	mch	8	458500	3.87	408200	554900	0.0655171	0.0344625	1.55	specific
YOR293W	RPS10A	2	1	190201	RPS10A_a_2_1	mch	9	196900	8.53	148800	234600	0.131133	0.103061	5.74	shared
YOR293W	RPS10A	2	1	190201	RPS10A_a_2_1	mch	14	384900	5.79	349500	521100	0.0818937	-0.0987458	5.36	opposite_direction
YOR293W	RPS10A	2	1	190201	RPS10A_a_2_1	mch	15	525400	6.13	476100	555300	0.117958	0.0638174	1.52	specific
YLL028W	TPO1	1	1	190201	TPO1_a_1_1	gfp	7	113100	8.67	77900	214700	-0.106747	-0.057953	2.46	specific
YLL028W	TPO1	1	1	190201	TPO1_a_1_1	gfp	7	478800	16.93	453700	507200	-0.171415	-0.0318247	1.5	specific
YLL028W	TPO1	1	1	190201	TPO1_a_1_1	gfp	9	42300	4.51	0	104300	0.0819163	0.0293695	1.26	specific
YLL028W	TPO1	1	1	190201	TPO1_a_1_1	gfp	10	100500	3.19	0	160200	0.0708472	0.0288175	0.99	specific
YLL028W	TPO1	1	1	190201	TPO1_a_1_1	gfp	12	689700	24.11	672100	708500	-0.2032	-0.106239	6.2	shared
YLL028W	TPO1	1	1	190201	TPO1_a_1_1	gfp	13	420300	4.18	66700	469400	-0.0628747	0.017128	1.07	specific
YLL028W	TPO1	1	1	190201	TPO1_a_1_1	gfp	14	478300	24.42	457300	498700	0.210316	0.258402	38.83	shared
YLL028W	TPO1	1	1	190201	TPO1_a_1_1	gfp	15	145100	288.1	135600	152200	-0.839396	-0.20049	27.07	shared
YLL028W	TPO1	1	1	190201	TPO1_a_1_1	gfp	15	603300	14.08	582800	644400	0.151776	-0.017852	0.69	specific
YLL028W	TPO1	1	1	190201	TPO1_a_1_1	gfp	16	428100	3.38	307700	471700	0.0643831	-0.0215332	0.9	specific
YLL028W	TPO1	1	1	190201	TPO1_a_1_1	mch	6	206400	4.54	103900	270000	-0.0712696	0.010881	0.45	specific
YLL028W	TPO1	1	1	190201	TPO1_a_1_1	mch	7	175600	3.98	87700	249000	-0.0854354	-0.105825	7.64	shared
YLL028W	TPO1	1	1	190201	TPO1_a_1_1	mch	8	64000	3.11	0	143900	-0.0647465	-0.00289764	0.56	specific
YLL028W	TPO1	1	1	190201	TPO1_a_1_1	mch	11	301800	4.45	234100	337300	-0.0552794	-0.0142169	0.79	specific
YLL028W	TPO1	1	1	190201	TPO1_a_1_1	mch	12	701800	6.6	622000	755200	-0.100539	-0.200361	23.02	shared
YLL028W	TPO1	1	1	190201	TPO1_a_1_1	mch	13	61500	10.64	37800	89200	-0.138689	-0.0386853	1.99	specific
YLL028W	TPO1	1	1	190201	TPO1_a_1_1	mch	14	465100	40.42	446500	480200	0.267309	0.212295	23.2	shared
YLL028W	TPO1	1	1	190201	TPO1_a_1_1	mch	15	119600	28.69	104900	149500	-0.199251	-0.771176	278.19	shared
YLL028W	TPO1	2	1	190201	TPO1_a_2_1	gfp	1	116500	4.5	64500	207800	-0.0934737	0.0203848	0.45	specific
YLL028W	TPO1	2	1	190201	TPO1_a_2_1	gfp	5	166600	3.06	92300	228600	-0.0768044	-0.00953974	0.58	specific
YLL028W	TPO1	2	1	190201	TPO1_a_2_1	gfp	7	132900	6.89	83000	187400	-0.100238	-0.0597879	1.56	specific
YLL028W	TPO1	2	1	190201	TPO1_a_2_1	gfp	7	512900	13.98	475000	542200	-0.168737	-0.0287306	0.79	specific
YLL028W	TPO1	2	1	190201	TPO1_a_2_1	gfp	12	675400	39.4	653300	703600	-0.264634	-0.169048	18.67	shared
YLL028W	TPO1	2	1	190201	TPO1_a_2_1	gfp	14	407300	10.55	373100	446600	0.13495	0.152049	11.1	shared
YLL028W	TPO1	2	1	190201	TPO1_a_2_1	gfp	15	147500	295.77	142000	155800	-0.801256	-0.117619	7.93	shared
YLL028W	TPO1	2	1	190201	TPO1_a_2_1	gfp	15	702200	5.64	619900	768700	0.090564	-0.0437173	1.64	specific
YLL028W	TPO1	2	1	190201	TPO1_a_2_1	mch	2	626000	6.25	512800	668200	-0.0997014	0.0303243	0.97	specific
YLL028W	TPO1	2	1	190201	TPO1_a_2_1	mch	11	315200	4.8	294500	388500	-0.0668954	-0.0139146	0.45	specific
YLL028W	TPO1	2	1	190201	TPO1_a_2_1	mch	12	652600	20.65	628600	675700	-0.179383	-0.253615	37.21	shared
YLL028W	TPO1	2	1	190201	TPO1_a_2_1	mch	13	65300	4.74	0	132000	-0.0884367	-0.0345243	1.08	specific
YLL028W	TPO1	2	1	190201	TPO1_a_2_1	mch	14	473700	25.54	451300	497000	0.226979	0.11978	6.04	shared
YLL028W	TPO1	2	1	190201	TPO1_a_2_1	mch	15	169500	8.22	101600	205600	-0.121584	-0.76772	274.5	shared
YKL035W	UGP1	0	1	180529	UGP1_a_0_1	gfp	1	180700	4.02	115800	207800	-0.0899377	0.0289983	0.48	specific
YKL035W	UGP1	0	1	180529	UGP1_a_0_1	gfp	4	66500	5.51	0	141200	-0.0920709	-0.115794	6.06	shared
YKL035W	UGP1	0	1	180529	UGP1_a_0_1	gfp	4	1034300	14.37	986700	1098700	0.171883	-0.161303	16.53	opposite_direction
YKL035W	UGP1	0	1	180529	UGP1_a_0_1	gfp	7	355200	3.85	307300	425300	0.0909031	0.0282979	0.53	specific
YKL035W	UGP1	0	1	180529	UGP1_a_0_1	gfp	10	144800	49.79	129800	166500	-0.330868	0.106532	4.68	opposite_direction
YKL035W	UGP1	0	1	180529	UGP1_a_0_1	gfp	12	689200	27.02	655500	716400	0.255525	-0.0299543	1.14	specific
YKL035W	UGP1	0	1	180529	UGP1_a_0_1	gfp	13	273800	6.54	130900	314900	0.0865774	0.0331401	0.85	specific
YKL035W	UGP1	0	1	180529	UGP1_a_0_1	gfp	14	466100	13.48	441000	495800	0.193633	0.190331	15.16	shared
YKL035W	UGP1	0	1	180529	UGP1_a_0_1	gfp	15	149300	11.23	117800	186100	-0.160186	-0.0165293	0.6	specific
YKL035W	UGP1	0	1	180529	UGP1_a_0_1	mch	2	626000	4.43	312300	735200	-0.0969632	-0.00245245	0.41	specific
YKL035W	UGP1	0	1	180529	UGP1_a_0_1	mch	4	70500	6.15	0	111300	-0.116196	-0.0935903	5.48	shared
YKL035W	UGP1	0	1	180529	UGP1_a_0_1	mch	4	1069300	18.55	1034400	1104600	-0.172151	0.169882	13.41	opposite_direction
YKL035W	UGP1	0	1	180529	UGP1_a_0_1	mch	10	141700	4.73	44500	197800	0.107588	-0.330377	49.65	opposite_direction
YKL035W	UGP1	0	1	180529	UGP1_a_0_1	mch	13	62000	4.23	0	106200	-0.0990864	0.0727522	2.75	specific
YKL035W	UGP1	0	1	180529	UGP1_a_0_1	mch	14	485300	16.59	458300	506500	0.193449	0.17868	12.56	shared
YKL035W	UGP1	1	1	190201	UGP1_a_1_1	gfp	1	143300	5.15	109800	191000	-0.126051	-0.00303848	0.42	specific
YKL035W	UGP1	1	1	190201	UGP1_a_1_1	gfp	4	1010000	18.41	980900	1074300	0.179748	-0.221719	32.35	opposite_direction
YKL035W	UGP1	1	1	190201	UGP1_a_1_1	gfp	7	356100	4.47	306700	408100	0.0983408	0.0118917	0.62	specific
YKL035W	UGP1	1	1	190201	UGP1_a_1_1	gfp	8	13800	4.45	0	118900	0.1204	-0.017243	1.03	specific
YKL035W	UGP1	1	1	190201	UGP1_a_1_1	gfp	10	150400	42.77	139800	173600	-0.27357	0.116491	6.61	opposite_direction
YKL035W	UGP1	1	1	190201	UGP1_a_1_1	gfp	10	657600	18.16	632200	674600	0.150275	-0.00938819	0.41	specific
YKL035W	UGP1	1	1	190201	UGP1_a_1_1	gfp	11	217500	3.04	99800	295200	0.0362898	-0.00397217	0.41	specific
YKL035W	UGP1	1	1	190201	UGP1_a_1_1	gfp	12	140600	3.68	73100	223600	-0.0941685	-0.0409268	1.41	specific
YKL035W	UGP1	1	1	190201	UGP1_a_1_1	gfp	12	689700	21.33	647900	752200	0.175321	-0.0651136	2.83	specific
YKL035W	UGP1	1	1	190201	UGP1_a_1_1	gfp	13	237100	3.55	99600	336500	0.0708386	0.0583082	2.18	specific
YKL035W	UGP1	1	1	190201	UGP1_a_1_1	gfp	14	501500	11.45	446500	526000	0.140405	0.270046	41.87	shared
YKL035W	UGP1	1	1	190201	UGP1_a_1_1	gfp	15	172300	19.47	151900	189400	-0.20127	-0.0763164	5.15	shared
YKL035W	UGP1	1	1	190201	UGP1_a_1_1	gfp	15	512400	4.35	481400	536900	-0.103036	-0.00374375	0.63	specific
YKL035W	UGP1	1	1	190201	UGP1_a_1_1	gfp	16	145200	3.5	0	250400	-0.0651324	-0.00983988	0.43	specific
YKL035W	UGP1	1	1	190201	UGP1_a_1_1	mch	4	1083100	51.28	1067600	1098000	-0.276239	0.17565	15.74	opposite_direction
YKL035W	UGP1	1	1	190201	UGP1_a_1_1	mch	10	131100	7.9	97400	164600	0.125824	-0.24807	38.54	opposite_direction
YKL035W	UGP1	1	1	190201	UGP1_a_1_1	mch	12	637600	4.96	568700	687500	-0.0894393	0.162053	16.98	opposite_direction
YKL035W	UGP1	1	1	190201	UGP1_a_1_1	mch	13	65400	11.81	38000	91300	-0.140018	0.0159789	0.58	specific
YKL035W	UGP1	1	1	190201	UGP1_a_1_1	mch	13	321500	4.98	252900	379400	0.100151	0.0328176	1.85	specific
YKL035W	UGP1	1	1	190201	UGP1_a_1_1	mch	14	476800	47.63	461300	492700	0.285701	0.13749	10.68	shared
YKL035W	UGP1	1	1	190201	UGP1_a_1_1	mch	15	147100	6	104400	204700	-0.091142	-0.18164	16.76	shared
YKL035W	UGP1	0	2	180529	UGP1_aF_0_1	gfp	2	384600	4.51	346100	429800	-0.0998664	-0.033541	0.46	specific
YKL035W	UGP1	0	2	180529	UGP1_aF_0_1	gfp	3	176500	3.38	135700	232900	0.0208389	-0.0132558	4.84	opposite_direction
YKL035W	UGP1	0	2	180529	UGP1_aF_0_1	gfp	4	86100	7.61	0	124100	-0.100989	-0.0664083	3.5	shared
YKL035W	UGP1	0	2	180529	UGP1_aF_0_1	gfp	4	362400	3.13	307600	431200	-0.0729085	-0.000756401	0.79	specific
YKL035W	UGP1	0	2	180529	UGP1_aF_0_1	gfp	4	1076300	21.25	1046100	1101400	0.174695	-0.167142	10.21	opposite_direction
YKL035W	UGP1	0	2	180529	UGP1_aF_0_1	gfp	5	39100	4.49	16100	75000	-0.0225388	-0.00226862	5.13	shared
YKL035W	UGP1	0	2	180529	UGP1_aF_0_1	gfp	7	125700	9.05	106600	182200	0.136364	-0.0194271	0.56	specific
YKL035W	UGP1	0	2	180529	UGP1_aF_0_1	gfp	8	3700	3.52	0	129500	0.0798704	-0.0665859	1.59	specific
YKL035W	UGP1	0	2	180529	UGP1_aF_0_1	gfp	10	150500	56.2	142400	159300	-0.319741	0.111354	3.1	opposite_direction
YKL035W	UGP1	0	2	180529	UGP1_aF_0_1	gfp	11	129000	3.96	84100	199700	0.105484	0.0311532	0.57	specific
YKL035W	UGP1	0	2	180529	UGP1_aF_0_1	gfp	12	680200	43.87	656100	703400	0.297443	-0.0153078	0.41	specific
YKL035W	UGP1	0	2	180529	UGP1_aF_0_1	gfp	13	325300	10.32	284600	363600	0.143489	-0.0234759	0.4	specific
YKL035W	UGP1	0	2	180529	UGP1_aF_0_1	gfp	14	485300	21.4	460700	507400	0.181876	0.255593	24.56	shared
YKL035W	UGP1	0	2	180529	UGP1_aF_0_1	gfp	15	166700	43.17	155600	181100	-0.290362	-0.0393296	1.5	specific
YKL035W	UGP1	0	2	180529	UGP1_aF_0_1	mch	3	195100	4.87	147000	222700	-0.0199436	0.0211837	3.15	opposite_direction
YKL035W	UGP1	0	2	180529	UGP1_aF_0_1	mch	4	129000	4.12	0	224100	-0.0435036	-0.0900345	5.21	shared
YKL035W	UGP1	0	2	180529	UGP1_aF_0_1	mch	4	1061200	10.62	988600	1104400	-0.166546	0.179036	20.8	opposite_direction
YKL035W	UGP1	0	2	180529	UGP1_aF_0_1	mch	5	54900	5.26	17600	77500	-0.0166264	-0.0304196	3.99	shared
YKL035W	UGP1	0	2	180529	UGP1_aF_0_1	mch	10	117600	3.73	0	235300	0.124337	-0.282981	44.99	opposite_direction
YKL035W	UGP1	0	2	180529	UGP1_aF_0_1	mch	11	398100	4.54	344800	423400	-0.0189994	-0.0164844	0.53	specific
YKL035W	UGP1	0	2	180529	UGP1_aF_0_1	mch	13	28700	3.58	0	166700	-0.076214	0.0498981	1.61	specific
YKL035W	UGP1	0	2	180529	UGP1_aF_0_1	mch	14	487900	24.63	453800	502800	0.254099	0.18096	21.38	shared
YKL035W	UGP1	0	2	180529	UGP1_aF_0_1	mch	15	73700	4.28	0	152200	-0.0774833	-0.172438	20.65	shared
YKL035W	UGP1	0	2	180529	UGP1_aF_0_1	mch	15	558500	4.39	493400	612200	0.0750472	0.0410668	1.02	specific
Untagged	Untagged	0	1	180515	NA_i_0_1	gfp	2	170300	4.24	29100	275000	-0.0862662	-0.0175513	0.4	specific
Untagged	Untagged	0	1	180515	NA_i_0_1	gfp	5	211900	3.39	102600	294400	0.0748434	0.0384051	1.39	specific
Untagged	Untagged	0	1	180515	NA_i_0_1	gfp	7	203000	3.16	96900	291400	-0.081158	0.086342	3.67	shared
Untagged	Untagged	0	1	180515	NA_i_0_1	gfp	12	1055400	10.38	1007600	1058900	0.174572	0.0258823	0.45	specific
Untagged	Untagged	0	1	180515	NA_i_0_1	gfp	13	74400	14.49	54600	108600	0.155394	0.057022	0.65	specific
Untagged	Untagged	0	1	180515	NA_i_0_1	gfp	14	477700	5.1	419400	524300	-0.0993992	0.221433	20.66	shared
Untagged	Untagged	0	1	180515	NA_i_0_1	gfp	15	183300	3.61	119500	264900	0.0899866	-0.0192691	0.55	specific
Untagged	Untagged	0	1	180515	NA_i_0_1	mch	5	377600	8.48	349200	415700	0.101538	0.0114201	0.41	specific
Untagged	Untagged	0	1	180515	NA_i_0_1	mch	7	113600	5.13	0	232700	0.0775863	-0.0433621	1.57	specific
Untagged	Untagged	0	1	180515	NA_i_0_1	mch	7	404000	3.73	330300	493700	0.089693	-0.0032066	0.42	specific
Untagged	Untagged	0	1	180515	NA_i_0_1	mch	8	111300	14.32	68100	150800	0.184911	-0.0139795	0.92	specific
Untagged	Untagged	0	1	180515	NA_i_0_1	mch	12	695000	13.77	653800	773900	-0.164468	0.0157721	0.78	specific
Untagged	Untagged	0	1	180515	NA_i_0_1	mch	13	286700	11.4	231800	321900	0.154702	0.00728138	0.4	specific
Untagged	Untagged	0	1	180515	NA_i_0_1	mch	14	531100	23.47	486500	552200	0.224233	-0.0510753	2.6	specific
Untagged	Untagged	0	1	180515	NA_i_0_1	mch	16	587900	3.7	474900	638600	0.0505185	0.0646207	2.42	specific
