# Supplementary material for: Simultaneous quantification of mRNA and protein in single cells reveals post-transcriptional effects of genetic variation
Source: eLife journal article supplement (doi:10.7554/elife.60645), 2020-11-16
Supplement: supp [file elife-60645-supp-v1.zip › elife_poa_e60645_Figure_4_source_data_2.xlsx]

## Sheet: Sheet1
SourceData_04_2: Comparison of significant protein-QTLs (LOD score > 4.5) between this study and previous work (Albert et al. 2014; used in Figure 4B)
sysname	gene	chromosome	brion_maxpos	brion_deltaAF	brion_LOD	brion_number_replicate_observed	albert_maxpos	albert_deltaAF	albert_LOD	category	same_sign
YGL202W	ARO8	1	143400	-0.10294	4.84	2	143624	0.0370812	0	unique_brion	0
YGL202W	ARO8	2	134800	0.113297	7.93	1	135186	0.0692291	0	unique_brion	1
YGL202W	ARO8	4	614900	0.0805602	4.62	1	614736	0.000282619	0	unique_brion	1
YGL202W	ARO8	4	691900	0.0894683	5.135	1	691928	-0.0256131	0	unique_brion	0
YGL202W	ARO8	4	1463798	0.0317753	1.045	0	1463800	-0.161059	10.25	unique_albert	0
YGL202W	ARO8	5	385000	-0.113174	8.6325	2	384152	0.032774	0	unique_brion	0
YGL202W	ARO8	8	435600	-0.102463	8.0775	2	422200	-0.197318	21.48	shared	1
YGL202W	ARO8	10	157500	-0.102333	6.67	1	157483	-0.0556556	0	unique_brion	1
YGL202W	ARO8	11	235250	-0.200319	24.52	2	235209	-0.0221194	0	unique_brion	1
YGL202W	ARO8	13	32400	-0.110148	4.525	2	66400	0.164326	14.63	opposite_direction	0
YGL202W	ARO8	13	250800	0.127632	10.08	1	250460	0.0100873	0	unique_brion	1
YGL202W	ARO8	13	419900	0.0859516	5.455	1	420097	0.0446709	0	unique_brion	1
YGL202W	ARO8	13	710750	0.0932196	6.2075	2	711469	0.0499719	0	unique_brion	1
YGL202W	ARO8	14	162150	-0.40284	85.4725	2	163968	-0.0368523	0	unique_brion	1
YGL202W	ARO8	14	258590	-0.305997	50.34	0	258500	-0.0908568	4.56	unique_albert	1
YGL202W	ARO8	14	468100	0.180911	14.585	2	468490	0.0215432	0	unique_brion	1
YGL202W	ARO8	15	703850	0.149389	13.1525	2	703125	0.0278283	0	unique_brion	1
YDR099W	BMH2	1	152400	-0.137931	10.4025	2	152338	-0.033128	0	unique_brion	1
YDR099W	BMH2	4	174800	-0.0987388	5.585	2	174832	0.0152853	0	unique_brion	0
YDR099W	BMH2	5	425800	-0.0876057	5.43	2	425829	-0.0239187	0	unique_brion	1
YDR099W	BMH2	7	380900	0.102642	4.9925	2	380673	0.0235058	0	unique_brion	1
YDR099W	BMH2	7	962982	-0.0239276	0.745	0	963000	0.0857296	5.11	unique_albert	0
YDR099W	BMH2	10	171900	-0.195052	22.2375	2	171760	-0.0742246	0	unique_brion	1
YDR099W	BMH2	11	305150	-0.308176	60.4775	2	262200	-0.153628	11.87	shared	1
YDR099W	BMH2	13	72351	0.0412756	1.715	0	72400	0.226024	23.33	unique_albert	1
YDR099W	BMH2	13	339650	0.130082	9.8825	2	339642	0.0671909	0	unique_brion	1
YDR099W	BMH2	14	225850	-0.123975	10.0325	2	225777	-0.0585363	0	unique_brion	1
YDR099W	BMH2	14	464233	0.0543706	1.7	0	464200	0.344273	53.67	unique_albert	1
YDR099W	BMH2	15	187800	-0.108765	8.285	2	172400	-0.0882071	4.54	shared	1
YDR099W	BMH2	15	564700	-0.0850607	7.09	1	564576	0.0303015	0	unique_brion	0
YLR286C	CTS1	13	64400	0.154882	14.165	2	NA	NA	NA	NA
YJR048W	CYC1	5	397450	-0.10782	7.1725	2	389100	-0.133226	8.74	shared	1
YJR048W	CYC1	8	101020	0.0559152	1.675	0	100800	0.152073	9.78	unique_albert	1
YJR048W	CYC1	8	409115	-0.0264897	0.875	0	409100	-0.0965648	5.11	unique_albert	1
YJR048W	CYC1	11	189300	-0.097322	7.7675	2	238100	-0.146112	7.76	shared	1
YJR048W	CYC1	12	661850	-0.929639	308.795	2	655600	-0.841068	197.09	shared	1
YJR048W	CYC1	13	369050	0.13448	10.4125	2	411100	-0.267102	28.95	opposite_direction	0
YJR048W	CYC1	14	463554	0.056243	1.635	0	463200	-0.280561	40.58	unique_albert	0
YJR048W	CYC1	15	139800	-0.141656	12.26	2	139908	-0.00920262	0	unique_brion	1
YDL022W	GPD1	1	32883	0.0311375	0.881667	0	32900	0.140626	7.67	unique_albert	1
YDL022W	GPD1	2	416817	-0.123835	9.95611	6	454300	-0.179586	13.67	shared	1
YDL022W	GPD1	4	208160	-0.108453	6.76733	5	209792	-0.0758042	0	unique_brion	1
YDL022W	GPD1	4	607474	-0.0513413	1.39667	0	607800	-0.126784	7.13	unique_albert	1
YDL022W	GPD1	5	382650	0.146497	14.1767	6	382804	0.384092	0	unique_brion	1
YDL022W	GPD1	5	504390	0.104103	10.95	0	504300	0.538404	123.79	unique_albert	1
YDL022W	GPD1	10	154017	-0.430413	94.1814	6	153500	-0.230109	22.11	shared	1
YDL022W	GPD1	10	661067	0.132745	10.8928	6	661161	0.0660677	0	unique_brion	1
YDL022W	GPD1	11	268500	-0.211429	24.9428	6	279400	-0.181467	12.09	shared	1
YDL022W	GPD1	12	224633	-0.0642385	3.79722	3	166000	-0.127486	9.17	shared	1
YDL022W	GPD1	12	689920	0.134269	12.4777	5	659300	0.249814	27.24	shared	1
YDL022W	GPD1	12	928500	0.0962857	6.50556	3	928625	0.0710792	0	unique_brion	1
YDL022W	GPD1	13	129926	0.0952185	6.90833	0	129700	0.127363	8.09	unique_albert	1
YDL022W	GPD1	13	253667	0.147029	13.2242	6	253667	0.0448904	0	unique_brion	1
YDL022W	GPD1	14	524800	0.109683	7.58778	6	481600	0.196202	16.54	shared	1
YDL022W	GPD1	15	585970	-0.0284086	1.33	0	586100	0.10755	4.98	unique_albert	0
YKR080W	MTD1	2	259158	-0.0258096	1.39	0	259100	0.0850008	4.64	unique_albert	0
YKR080W	MTD1	2	456535	-0.0119004	0.965	0	456600	0.123205	5.61	unique_albert	0
YKR080W	MTD1	4	1464119	-0.0354964	1.58	0	1464100	-0.191316	16.57	unique_albert	1
YKR080W	MTD1	5	198538	0.0215667	0.58	0	198400	-0.124621	6.02	unique_albert	0
YKR080W	MTD1	7	156252	0.0193742	0.55	0	156500	-0.109957	5.79	unique_albert	0
YKR080W	MTD1	7	391900	0.0920121	5.335	1	392320	0.0300887	0	unique_brion	1
YKR080W	MTD1	7	530100	0.0743705	5.325	1	530312	0.016866	0	unique_brion	1
YKR080W	MTD1	8	176350	-0.141783	13.145	2	167900	-0.272176	30.26	shared	1
YKR080W	MTD1	10	181550	0.11791	8.3375	2	251000	0.111858	5.27	shared	1
YKR080W	MTD1	10	656567	-0.026581	0.745	0	656300	-0.229705	24.45	unique_albert	1
YKR080W	MTD1	13	136900	0.25096	37.8925	2	103800	0.250501	30.31	shared	1
YKR080W	MTD1	14	200700	-0.230954	29.745	2	232800	-0.140834	10.48	shared	1
YKR080W	MTD1	14	597130	-0.0169027	0.795	0	597100	-0.117589	6.46	unique_albert	1
YKR080W	MTD1	15	228074	0.00749265	0.47	0	227800	0.103033	5.41	unique_albert	1
YKR080W	MTD1	15	742300	0.0976651	5.27	2	741454	0.0307494	0	unique_brion	1
YKR080W	MTD1	15	900947	0.0266025	1.16	0	902900	0.108911	4.6	unique_albert	1
YGL055W	OLE1	1	43500	-0.285836	32.6275	2	40100	-0.214851	24.37	shared	1
YGL055W	OLE1	5	312465	-0.00897131	0.46	0	312400	0.113104	7.53	unique_albert	0
YGL055W	OLE1	7	541808	-0.00433582	0.425	0	541700	0.114593	6.56	unique_albert	0
YGL055W	OLE1	11	325400	-0.127433	15.5	1	327672	-0.0399304	0	unique_brion	1
YGL055W	OLE1	11	411000	-0.167628	16.285	1	410994	-0.0295261	0	unique_brion	1
YGL055W	OLE1	12	229358	-0.0275588	0.765	0	230300	-0.113854	5.16	unique_albert	1
YGL055W	OLE1	12	655100	-0.315608	67.9725	2	655300	-0.436319	89.93	shared	1
YGL055W	OLE1	13	62600	0.0904799	4.8175	2	123900	0.129659	6.24	shared	1
YGL055W	OLE1	14	480472	-0.0014638	0.72	0	480300	0.151081	13.4	unique_albert	0
YGL055W	OLE1	15	571950	-0.087434	5.8275	2	571946	0.0169018	0	unique_brion	0
YOR293W	RPS10A	3	106400	0.047544	8.78	1	NA	NA	NA	NA
YOR293W	RPS10A	5	58100	0.0172861	5.2	1	NA	NA	NA	NA
YOR293W	RPS10A	13	88000	0.188022	22.38	1	NA	NA	NA	NA
YOR293W	RPS10A	14	217700	-0.0974573	5.17	1	NA	NA	NA	NA
YOR293W	RPS10A	15	138300	0.077189	5.18	1	NA	NA	NA	NA
YOR293W	RPS10A	15	785000	0.0809527	12.98	1	NA	NA	NA	NA
YLL028W	TPO1	2	175784	0.0122019	0.5	0	175700	0.0870602	5.1	unique_albert	1
YLL028W	TPO1	5	191306	-0.0655657	1.905	0	191600	-0.165422	13.02	unique_albert	1
YLL028W	TPO1	7	123000	-0.103416	7.2625	2	130200	-0.113435	6.49	shared	1
YLL028W	TPO1	7	495850	-0.159673	14.355	2	475300	-0.345167	51.83	shared	1
YLL028W	TPO1	10	160930	0.0406458	1.695	0	160900	0.150766	10.83	unique_albert	1
YLL028W	TPO1	12	682550	-0.232287	31.3	2	682832	-0.0110958	0	unique_brion	1
YLL028W	TPO1	13	65230	-0.0375417	1.595	0	65500	0.137655	10.95	unique_albert	0
YLL028W	TPO1	14	442800	0.155122	13.75	2	457000	0.102036	5.12	shared	1
YLL028W	TPO1	15	146300	-0.82017	291.783	2	162300	-0.861383	191.31	shared	1
YLL028W	TPO1	15	603300	0.103099	8.57	1	612800	0.132035	8.35	shared	1
YLL028W	TPO1	15	702200	0.0889108	5.88	1	701451	0.0557276	0	unique_brion	1
YKL035W	UGP1	1	40380	0.0540312	0.753333	0	40600	0.0864691	4.8	unique_albert	1
YKL035W	UGP1	2	400486	-0.0563347	2.35667	0	400300	-0.1047	6.32	unique_albert	1
YKL035W	UGP1	4	76300	-0.0852305	4.815	2	76253	-0.0293501	0	unique_brion	1
YKL035W	UGP1	4	593211	-0.0230418	0.84	0	593200	-0.141286	9.48	unique_albert	1
YKL035W	UGP1	4	1040200	0.173377	16.5511	3	1040297	-0.0303333	0	unique_brion	0
YKL035W	UGP1	7	125700	0.0998132	4.76667	1	141300	0.10275	5.63	shared	1
YKL035W	UGP1	7	556096	0.0132432	0.55	0	556600	0.0946593	5.15	unique_albert	1
YKL035W	UGP1	8	149347	0.0233613	0.996667	0	149500	0.131266	4.65	unique_albert	1
YKL035W	UGP1	10	148567	-0.30731	49.3078	3	148289	-0.0533559	0	unique_brion	1
YKL035W	UGP1	10	657600	0.0737025	6.8	1	657700	0.0539418	0	unique_brion	1
YKL035W	UGP1	11	98707	0.0466667	1.38333	0	98400	0.12516	10.49	unique_albert	1
YKL035W	UGP1	12	140997	-0.0664787	2.45667	0	140800	-0.183786	14.99	unique_albert	1
YKL035W	UGP1	12	686367	0.241436	30.6144	3	632100	0.165292	14.93	shared	1
YKL035W	UGP1	12	969880	0.0654487	4.31667	0	969500	0.147087	8.03	unique_albert	1
YKL035W	UGP1	13	278733	0.0872871	5.50111	3	278674	-0.000420208	0	unique_brion	0
YKL035W	UGP1	14	484300	0.166145	14.6144	3	466900	0.251197	26.46	shared	1
YKL035W	UGP1	15	162767	-0.213459	23.6844	3	158600	-0.270477	32.11	shared	1
YKL035W	UGP1	16	183482	-0.0378654	1.86	0	185500	-0.152079	7.98	unique_albert	1
YKL035W	UGP1	16	499388	-0.0185333	0.83	0	499500	-0.138582	12.86	unique_albert	1
