# Supplementary material for: Simultaneous quantification of mRNA and protein in single cells reveals post-transcriptional effects of genetic variation
Source: eLife journal article supplement (doi:10.7554/elife.60645), 2020-11-16
Supplement: supp [file elife-60645-supp-v1.zip › elife_poa_e60645_Figure_4_source_data_3.xlsx]

## Sheet: Sheet1
SourceData_04_3: Comparison of significant mRNA-QTLs (LOD score > 4.5) between this study and previous work (Albert, Bloom et al. 2018; used in Figure 4C)
sysname	gene	chromosome	brion_maxpos	brion_deltaAF	brion_LOD	brion_replicate_score	albert_maxpos	albert_R	albert_LOD	category	chr14_excluded	same_sign
YGL202W	ARO8	2	117250	0.106527	6.345	2	117298	-0.0655487	0	unique_brion	no	0
YGL202W	ARO8	2	614800	-0.0918014	5.5625	2	614131	-0.0804425	0	unique_brion	no	1
YGL202W	ARO8	4	690684	-0.00737031	0.975	0	690684	0.133369	3.94397	unique_albert	no	0
YGL202W	ARO8	8	103200	-0.1452	7.64	2	103046	0.00258056	0	unique_brion	no	0
YGL202W	ARO8	9	141321	0.00250768	0.405	0	141022	-0.127272	3.58876	unique_albert	no	0
YGL202W	ARO8	12	665236	0.00164884	0.485	0	665236	0.202997	9.24745	unique_albert	no	1
YGL202W	ARO8	13	78200	-0.110181	6.6425	2	78125	0.0768229	0	unique_brion	no	0
YGL202W	ARO8	14	288822	0.0283712	2.1	0	288822	-0.130295	3.76275	unique_albert	no	0
YGL202W	ARO8	15	572900	0.060195	5.215	1	573312	0.0562123	0	unique_brion	no	1
YGL202W	ARO8	15	729380	-0.0391206	0.95	0	729380	0.137123	4.17129	unique_albert	no	0
YGL202W	ARO8	16	202708	0.0560557	2.305	0	202791	0.126225	3.52943	unique_albert	no	1
YDR099W	BMH2	2	575500	-0.106612	7.455	1	575460	0.00362309	0	unique_brion	no	0
YDR099W	BMH2	7	122047	-0.0133546	0.795	0	122047	0.248412	13.9971	unique_albert	no	0
YDR099W	BMH2	12	136527	0.0550299	2.08	0	136527	-0.130832	3.7941	unique_albert	no	0
YDR099W	BMH2	12	684400	-0.0730603	4.365	1	659350	-0.340704	27.1149	shared	no	1
YDR099W	BMH2	15	127240	-0.0168817	1.05	0	127240	-0.160369	5.72559	unique_albert	no	1
YDR099W	BMH2	15	545900	0.0712414	4.51	1	492116	-0.133391	3.9453	opposite_direction	no	0
YLR286C	CTS1	1	45431	-0.0270147	0.845	0	45522	0.18381	7.55296	unique_albert	no	0
YLR286C	CTS1	2	540838	-0.0532309	2.19	0	541139	0.139281	4.30495	unique_albert	no	0
YLR286C	CTS1	7	122120	-0.0112603	0.525	0	122421	0.250526	14.2443	unique_albert	no	0
YLR286C	CTS1	8	86500	-0.0753989	4.66	1	115977	0.225562	11.4751	opposite_direction	no	0
YLR286C	CTS1	10	108143	0.0118673	0.85	0	108259	-0.194101	8.43922	unique_albert	no	0
YLR286C	CTS1	10	652591	-0.0229337	0.625	0	652591	-0.211501	10.0568	unique_albert	no	1
YLR286C	CTS1	12	355836	0.0369665	0.97	0	355836	0.12189	3.28943	unique_albert	no	1
YLR286C	CTS1	13	68900	-0.0540621	3.51	1	18907	-0.147276	4.81897	shared	no	1
YLR286C	CTS1	14	267161	0.0124815	0.87	0	266760	0.128451	3.65612	unique_albert	no	1
YLR286C	CTS1	14	333469	0.0602814	3.35	0	333367	0.400897	38.5028	unique_albert	no	1
YLR286C	CTS1	15	169704	0.0487974	1.56	0	169704	-0.318038	23.4338	unique_albert	no	0
YLR286C	CTS1	16	501255	-0.00269862	0.415	0	501255	-0.209367	9.85024	unique_albert	no	1
YJR048W	CYC1	2	620700	-0.0677788	3.1475	2	611232	0.127996	3.63004	opposite_direction	no	0
YJR048W	CYC1	4	388440	-0.00804295	0.885	0	388440	-0.163766	5.97408	unique_albert	no	1
YJR048W	CYC1	6	211826	-0.0279626	0.82	0	211652	-0.118832	3.12527	unique_albert	no	1
YJR048W	CYC1	7	140030	0.00248225	0.4	0	140030	0.198631	8.84583	unique_albert	no	1
YJR048W	CYC1	8	153963	0.000567806	0.445	0	154167	-0.138913	4.28198	unique_albert	no	0
YJR048W	CYC1	10	649035	-0.0470133	1.535	0	648461	0.159354	5.65245	unique_albert	no	0
YJR048W	CYC1	11	253300	-0.091512	5.795	1	234378	-0.133183	3.93292	shared	no	1
YJR048W	CYC1	12	136527	0.0109387	0.89	0	136527	-0.126324	3.53502	unique_albert	no	0
YJR048W	CYC1	12	669250	-0.53479	150.095	2	657022	-0.832784	259.887	shared	no	1
YJR048W	CYC1	13	59050	-0.101586	6.9425	2	58688	0.0166506	0	unique_brion	no	0
YJR048W	CYC1	13	363400	0.0628154	3.665	1	338431	0.204906	9.42598	shared	no	1
YJR048W	CYC1	14	269607	0.0218666	1.3	0	269607	0.187813	7.89156	unique_albert	no	1
YJR048W	CYC1	15	151900	-0.0604598	3.24	1	156746	-0.203342	9.27953	shared	no	1
YJR048W	CYC1	15	482608	-0.0109013	0.655	0	482608	-0.143449	4.5692	unique_albert	no	1
YDL022W	GPD1	2	379311	-0.0354661	1.43	0	379311	-0.131769	3.84911	unique_albert	no	1
YDL022W	GPD1	4	229467	-0.0501391	2.26833	0	229467	-0.135995	4.10232	unique_albert	no	1
YDL022W	GPD1	5	515217	-0.279485	46.6136	6	515950	-0.0117812	0	unique_brion	no	1
YDL022W	GPD1	7	126466	0.00174082	0.451667	0	126593	0.240045	13.042	unique_albert	no	1
YDL022W	GPD1	12	136527	-0.0090816	0.755	0	136527	-0.171645	6.57162	unique_albert	no	1
YDL022W	GPD1	12	692650	-0.160227	15.3778	6	662515	-0.244141	13.505	shared	no	1
YDL022W	GPD1	14	300017	0.098182	9.795	0	300017	0.189332	8.02203	unique_albert	no	1
YDL022W	GPD1	15	140220	-0.0526699	2.19333	0	140220	-0.156424	5.44391	unique_albert	no	1
YDL022W	GPD1	15	524541	-0.0325417	1.84167	0	524541	-0.17157	6.56579	unique_albert	no	1
YDL022W	GPD1	16	291046	0.0234819	0.958333	0	291046	-0.121158	3.24973	unique_albert	no	0
YKR080W	MTD1	2	570950	-0.130762	8.5875	2	571034	0.0196818	0	unique_brion	no	0
YKR080W	MTD1	3	130372	0.00551471	0.455	0	130462	0.140536	4.38361	unique_albert	no	1
YKR080W	MTD1	4	629042	-0.0182273	1.215	0	628602	0.1779	7.06728	unique_albert	no	0
YKR080W	MTD1	7	141946	-0.01876	0.55	0	141743	-0.141596	4.45069	unique_albert	no	1
YKR080W	MTD1	7	373713	0.0482379	1.655	0	374227	0.149321	4.95525	unique_albert	no	1
YKR080W	MTD1	8	112800	-0.111806	10.105	2	186657	-0.146761	4.7849	shared	no	1
YKR080W	MTD1	9	86586	0.00915097	0.89	0	86720	-0.23486	12.4685	unique_albert	no	0
YKR080W	MTD1	10	133300	0.154144	11.5825	2	133354	-0.000778726	0	unique_brion	no	0
YKR080W	MTD1	12	136527	0.0081875	0.44	0	137918	0.162292	5.86559	unique_albert	no	1
YKR080W	MTD1	13	343663	0.0418991	2.365	0	343663	-0.17419	6.77099	unique_albert	no	0
YKR080W	MTD1	15	174019	0.0101701	0.52	0	173814	0.229066	11.8442	unique_albert	no	1
YGL055W	OLE1	1	51951	-0.0389236	1.31	0	52124	-0.280416	17.9972	unique_albert	no	1
YGL055W	OLE1	2	490264	-0.0296322	0.745	0	490264	0.141445	4.44108	unique_albert	no	0
YGL055W	OLE1	9	386249	0.00713864	0.465	0	386249	0.117488	3.05449	unique_albert	no	1
YGL055W	OLE1	11	532175	-0.0506779	1.575	0	531920	0.175344	6.86243	unique_albert	no	0
YGL055W	OLE1	12	681850	-0.177587	16.4	2	659769	-0.507039	65.3058	shared	no	1
YGL055W	OLE1	13	885661	0.0187365	0.545	0	885661	0.134288	3.99901	unique_albert	no	1
YGL055W	OLE1	14	335872	0.0752653	6.33	0	335872	0.151886	5.12897	unique_albert	no	1
YGL055W	OLE1	15	94227	0.0051699	0.89	0	94056	-0.114041	2.87672	unique_albert	no	0
YOR293W	RPS10A	2	609500	-0.103307	6.09	1	609073	-0.0244964	0	unique_brion	no	1
YOR293W	RPS10A	4	90300	-0.104817	6.56	1	90257	-0.043465	0	unique_brion	no	1
YOR293W	RPS10A	4	592352	-0.0242159	0.58	0	592352	-0.140698	4.39385	unique_albert	no	1
YOR293W	RPS10A	7	180027	-0.0243651	1.18	0	180027	-0.141669	4.4553	unique_albert	no	1
YOR293W	RPS10A	11	213000	-0.0884233	5.22	1	212874	0.00108631	0	unique_brion	no	0
YOR293W	RPS10A	12	660371	-0.0132533	0.65	0	660371	0.198183	8.80516	unique_albert	no	0
YOR293W	RPS10A	13	262700	0.111327	6.07	1	864754	-0.115334	2.94275	opposite_direction	no	0
YOR293W	RPS10A	15	139908	0.0344447	1.68	0	139908	0.152933	5.20072	unique_albert	no	1
YOR293W	RPS10A	16	198900	0.0867473	5.11	1	199138	0.0194086	0	unique_brion	no	1
YLL028W	TPO1	2	626000	-0.0763648	4.4	1	617783	0.181582	7.36788	opposite_direction	no	0
YLL028W	TPO1	4	131512	-0.0217561	1.045	0	131600	0.124935	3.45714	unique_albert	no	0
YLL028W	TPO1	10	156976	0.0141735	0.585	0	156976	0.126302	3.53381	unique_albert	no	1
YLL028W	TPO1	12	677200	-0.134171	12.7675	2	642132	-0.190791	8.14848	shared	no	1
YLL028W	TPO1	13	63400	-0.114001	7.6425	2	62570	0.0492808	0	unique_brion	no	0
YLL028W	TPO1	13	776467	0.0184098	0.465	0	776467	0.158888	5.61895	unique_albert	no	1
YLL028W	TPO1	15	144550	-0.155907	17.3475	2	151910	-0.704456	150.683	shared	no	1
YLL028W	TPO1	15	604757	-0.0191835	0.785	0	604413	0.170573	6.48863	unique_albert	no	0
YLL028W	TPO1	16	138394	0.015977	0.58	0	138394	0.128626	3.66612	unique_albert	no	1
YKL035W	UGP1	4	1071200	-0.20555	26.0544	3	1071689	-0.0765981	0	unique_brion	no	1
YKL035W	UGP1	7	131125	-0.0209381	0.576667	0	130869	0.171634	6.57081	unique_albert	no	0
YKL035W	UGP1	8	110970	-0.0659381	1.66	0	110970	0.115064	2.92889	unique_albert	no	0
YKL035W	UGP1	10	130133	0.118297	5.21556	3	129912	0.0358648	0	unique_brion	no	1
YKL035W	UGP1	12	136527	-0.0072683	0.79	0	136527	-0.229826	11.9251	unique_albert	no	1
YKL035W	UGP1	13	52033	-0.102694	6.01222	3	52335	0.00802147	0	unique_brion	no	0
YKL035W	UGP1	14	300017	0.0479326	3.32333	0	300017	0.258582	15.208	unique_albert	no	1
YKL035W	UGP1	15	139908	-0.0579565	3.03333	0	139908	-0.247027	13.8365	unique_albert	no	1
YKL035W	UGP1	15	512726	0.0506589	1.9	0	513015	-0.131127	3.81133	unique_albert	no	0
YGL202W	ARO8	14	377751	0.162013	17.765	0	377751	0.407683	39.9441	unique_albert	yes	1
YGL202W	ARO8	14	462150	0.290399	46.68	2	466588	0.207232	9.64597	shared	yes	1
YDR099W	BMH2	14	372376	0.16308	19.76	0	372376	0.120291	3.20304	unique_albert	yes	1
YDR099W	BMH2	14	469200	0.315886	55.9475	2	461863	-0.133157	3.93135	opposite_direction	yes	0
YLR286C	CTS1	14	466700	0.164685	18.515	2	453089	0.178993	7.1558	shared	yes	1
YJR048W	CYC1	14	400976	0.205024	21.635	0	400049	-0.288733	19.129	unique_albert	yes	0
YJR048W	CYC1	14	464050	0.273542	38.7475	2	464117	-0.0809734	0	unique_brion	yes	0
YDL022W	GPD1	14	472933	0.312339	57.1703	6	466588	-0.146337	4.757	opposite_direction	yes	0
YKR080W	MTD1	14	466750	0.264792	38.7325	2	442493	-0.325942	24.6817	opposite_direction	yes	0
YGL055W	OLE1	14	465450	0.205207	25.3425	2	465187	-0.172263	6.61978	opposite_direction	yes	0
YOR293W	RPS10A	14	370084	0.124924	13.5	0	370084	-0.256538	14.9602	unique_albert	yes	0
YOR293W	RPS10A	14	471000	0.231123	32.43	1	466588	0.195511	8.5647	shared	yes	1
YLL028W	TPO1	14	394076	0.156649	15.015	0	394076	-0.143546	4.57544	unique_albert	yes	0
YLL028W	TPO1	14	469400	0.245897	32.6775	2	469224	-0.0228716	0	unique_brion	yes	0
YKL035W	UGP1	14	376313	0.115606	9.09	0	376313	0.14056	4.38514	unique_albert	yes	1
YKL035W	UGP1	14	483333	0.244093	29.3289	3	481896	0.0653627	0	unique_brion	yes	1
