# Supplementary material for: Simultaneous quantification of mRNA and protein in single cells reveals post-transcriptional effects of genetic variation
Source: eLife journal article supplement (doi:10.7554/elife.60645), 2020-11-16
Supplement: supp [file elife-60645-supp-v1.zip › elife_poa_e60645_Figure_5_source_data_1.xlsx]

## Sheet: Sheet1
SourceData_05_1: List of tagged genes and number of QTLs identified (used in Figure 5A)
Tagged Gene	Systematic Name	Reason gene was included	Source	Number of replicates	Number of protein-QTLs (this study)	Number of protein-QTLs (Albert_2014)	Number of mRNA-QTLs (this study)	Number of mRNA-QTLs (eQTLs Albert_Bloom_2018)	Number of combined QTLs	Scenario 1: QTLs that affect mRNA and protein in same direction	Scenario 2: QTLs that affect only protein	Scenario 3: QTLs that affect only mRNA	Scenario 4: QTLs that affect mRNA and protein in opposite directions
ARO8	YGL202W	high discrepancy between previously observed eQTLs and pQTLs	GFP collection	2	15	4	5	6	17	4	11	2	0
BMH2	YDR099W	high discrepancy between previously observed eQTLs and pQTLs	GFP collection	2	10	5	3	5	11	0	9	1	1
GPD1	YDL022W	high discrepancy between previously observed eQTLs and pQTLs	GFP collection	6	11	11	2	9	10	0	8	1	1
MTD1	YKR080W	high discrepancy between previously observed eQTLs and pQTLs	GFP collection	2	7	13	3	9	8	2	5	1	0
UGP1	YKL035W	high discrepancy between previously observed eQTLs and pQTLs	GFP collection	3	9	14	3	6	9	0	6	1	2
CYC1	YJR048W	high similarity between previously observed eQTLs and pQTLs	BY4741	2	5	7	6	13	6	4	1	0	1
OLE1	YGL055W	high similarity between previously observed eQTLs and pQTLs	BY4741	2	6	7	1	8	6	2	3	0	1
TPO1	YLL028W	high similarity between previously observed eQTLs and pQTLs	BY4741	2	7	9	4	8	7	2	4	1	0
CTS1	YLR286C	high mRNA level but low protein fluorescence	BY4741	2	1	NA	2	12	2	0	0	1	1
RPS10A	YOR293W	high mRNA level but low protein fluorescence	BY4741	1	7	NA	5	5	10	2	5	3	0
No tag	no tag	-	BY4741	1	2	NA	6	NA	NA	NA	NA	NA	NA
Total	-	-	-	24	80	70	40	81	86	16	52	11	7
