# Supplementary material for: Simultaneous quantification of mRNA and protein in single cells reveals post-transcriptional effects of genetic variation
Source: eLife journal article supplement (doi:10.7554/elife.60645), 2020-11-16
Supplement: supp [file elife-60645-supp-v1.zip › elife_poa_e60645_Figure_5_source_data_2.xlsx]

## Sheet: Sheet1
SourceData_05_2: Comparison mRNA-QTLs and protein-QTLs (LOD score > 4.5) (used in Figure 5B)
sysname	gene	chromosome	position	best_lod	type	GFP_LOD	GFP_effect	GFP_maxPOS	GFP_leftPOS	GFP_rightPOS	mCH_LOD	mCH_effect	mCH_maxPOS	mCH_leftPOS	mCH_rightPOS	chr14_excluded	same_sign
YGL202W	ARO8	1	143400	4.84	gfp_specific	4.84	-0.10294	143400	95800	207800	0.2025	0.0105543	143400	95800	207800	no	0
YGL202W	ARO8	2	134800	7.93	similar_effect	7.93	0.113297	134800	114500	154500	6.345	0.106527	117250	59150	162150	no	1
YGL202W	ARO8	2	614800	5.5625	mcherry_specific	0.1675	0.00466988	614800	531200	675550	5.5625	-0.0918014	614800	531200	675550	no	0
YGL202W	ARO8	4	614900	4.62	gfp_specific	4.62	0.0805602	614900	474800	722700	0.18	0.00322773	614900	474800	722700	no	1
YGL202W	ARO8	4	691900	5.135	gfp_specific	5.135	0.0894683	691900	634800	763800	0.16	-0.00764164	691900	634800	763800	no	0
YGL202W	ARO8	5	385000	8.6325	gfp_specific	8.6325	-0.113174	385000	342950	446250	1.8725	-0.0542268	385000	342950	446250	no	1
YGL202W	ARO8	8	103200	7.64	mcherry_specific	0.17	-0.00324081	103200	69400	137550	7.64	-0.1452	103200	69400	137550	no	1
YGL202W	ARO8	8	435600	8.0775	gfp_specific	8.0775	-0.102463	435600	381750	476700	0.5425	-0.0267701	435600	381750	476700	no	1
YGL202W	ARO8	10	157500	6.67	gfp_specific	6.67	-0.102333	157500	123300	216500	1.835	0.049891	157500	123300	216500	no	0
YGL202W	ARO8	11	235250	24.52	similar_effect	24.52	-0.200319	235250	191200	277350	3.855	-0.060789	290800	181350	484650	no	1
YGL202W	ARO8	13	32400	6.6425	similar_effect	4.525	-0.110148	32400	0	79350	6.6425	-0.110181	78200	41050	117100	no	1
YGL202W	ARO8	13	250800	10.08	gfp_specific	10.08	0.127632	250800	224000	270600	0.94	0.0382944	250800	224000	270600	no	1
YGL202W	ARO8	13	419900	5.455	gfp_specific	5.455	0.0859516	419900	381900	486700	1.115	0.0409048	419900	381900	486700	no	1
YGL202W	ARO8	13	710750	6.2075	gfp_specific	6.2075	0.0932196	710750	657600	794800	0.69	0.0242038	710750	657600	794800	no	1
YGL202W	ARO8	14	162150	85.4725	gfp_specific	85.4725	-0.40284	162150	148500	177750	1.545	-0.0393273	162150	148500	177750	no	1
YGL202W	ARO8	15	572900	5.215	similar_effect	4.715	0.0817976	572900	516700	592200	5.215	0.060195	572900	516700	592200	no	1
YGL202W	ARO8	15	703850	13.1525	gfp_specific	13.1525	0.149389	703850	659550	793450	0.2825	-0.022047	703850	659550	793450	no	0
YDR099W	BMH2	1	152400	10.4025	gfp_specific	10.4025	-0.137931	152400	120350	207800	0.215	-0.00731782	152400	120350	207800	no	1
YDR099W	BMH2	2	575500	7.455	mcherry_specific	1.56	0.0457767	575500	537100	601800	7.455	-0.106612	575500	537100	601800	no	0
YDR099W	BMH2	4	174800	5.585	gfp_specific	5.585	-0.0987388	174800	139900	231600	2.9925	-0.0674759	174800	139900	231600	no	1
YDR099W	BMH2	5	425800	5.43	gfp_specific	5.43	-0.0876057	425800	320400	497550	0.8225	-0.0269111	425800	320400	497550	no	1
YDR099W	BMH2	7	380900	4.9925	gfp_specific	4.9925	0.102642	380900	321800	438550	1.54	0.0385421	380900	321800	438550	no	1
YDR099W	BMH2	10	171900	22.2375	gfp_specific	22.2375	-0.195052	171900	142600	213050	0.98	0.0352065	171900	142600	213050	no	0
YDR099W	BMH2	11	305150	60.4775	gfp_specific	60.4775	-0.308176	305150	280650	324550	0.0175	0.00382174	305150	280650	324550	no	0
YDR099W	BMH2	13	339650	9.8825	gfp_specific	9.8825	0.130082	339650	206850	381250	1.56	0.0342943	339650	206850	381250	no	1
YDR099W	BMH2	14	225850	10.0325	gfp_specific	10.0325	-0.123975	225850	166000	260600	0.1625	-0.00896676	225850	166000	260600	no	1
YDR099W	BMH2	15	187800	8.285	gfp_specific	8.285	-0.108765	187800	141950	213550	0.5375	-0.00854856	187800	141950	213550	no	1
YDR099W	BMH2	15	564700	7.09	opposite_direction	7.09	-0.0850607	564700	547500	587100	4.51	0.0712414	545900	500800	582000	no	0
YLR286C	CTS1	8	86500	4.66	mcherry_specific	0.38	-0.00189964	86500	56100	127600	4.66	-0.0753989	86500	56100	127600	no	1
YLR286C	CTS1	13	64400	14.165	opposite_direction	14.165	0.154882	64400	11050	104050	3.51	-0.0540621	68900	0	105700	no	0
YJR048W	CYC1	5	397450	7.1725	gfp_specific	7.1725	-0.10782	397450	360250	479700	1.88	-0.0325902	397450	360250	479700	no	1
YJR048W	CYC1	11	189300	7.7675	similar_effect	7.7675	-0.097322	189300	137600	263900	5.795	-0.091512	253300	159500	307000	no	1
YJR048W	CYC1	12	661850	308.795	similar_effect	308.795	-0.929639	661850	653200	670400	150.095	-0.53479	669250	653000	680250	no	1
YJR048W	CYC1	13	59050	6.9425	opposite_direction	4.435	0.0772038	59050	0	85500	6.9425	-0.101586	59050	0	85500	no	0
YJR048W	CYC1	13	369050	10.4125	similar_effect	10.4125	0.13448	369050	312250	430000	3.665	0.0628154	363400	288900	430200	no	1
YJR048W	CYC1	15	139800	12.26	similar_effect	12.26	-0.141656	139800	110250	172000	3.24	-0.0604598	151900	0	229900	no	1
YDL022W	GPD1	2	416817	9.95611	gfp_specific	9.95611	-0.123835	416817	347850	455300	1.68167	-0.0348695	416817	347850	455300	no	1
YDL022W	GPD1	4	208160	6.76733	gfp_specific	6.76733	-0.108453	208160	171780	266640	2.561	-0.0543606	208160	171780	266640	no	1
YDL022W	GPD1	5	382650	14.1767	gfp_specific	14.1767	0.146497	382650	348250	431533	8.64444	-0.0778155	382650	348250	431533	no	0
YDL022W	GPD1	5	515217	46.6136	mcherry_specific	9.6875	0.0976498	515217	502633	530567	46.6136	-0.279485	515217	502633	530567	no	0
YDL022W	GPD1	10	154017	94.1814	gfp_specific	94.1814	-0.430413	154017	143983	165933	0.852778	0.0238359	154017	143983	165933	no	0
YDL022W	GPD1	10	661067	10.8928	gfp_specific	10.8928	0.132745	661067	621983	697200	1.11556	-0.0231721	661067	621983	697200	no	0
YDL022W	GPD1	11	268500	24.9428	gfp_specific	24.9428	-0.211429	268500	243850	306667	1.42361	-0.0343796	268500	243850	306667	no	1
YDL022W	GPD1	12	689920	15.3778	opposite_direction	12.4777	0.134269	689920	648320	724140	15.3778	-0.160227	692650	653600	733267	no	0
YDL022W	GPD1	12	928500	6.50556	gfp_specific	6.50556	0.0962857	928500	879233	962133	0.689444	0.0298462	928500	879233	962133	no	1
YDL022W	GPD1	13	253667	13.2242	gfp_specific	13.2242	0.147029	253667	202433	295117	1.53361	0.049366	253667	202433	295117	no	1
YKR080W	MTD1	2	570950	8.5875	mcherry_specific	0.1375	0.0115999	570950	528650	631050	8.5875	-0.130762	570950	528650	631050	no	0
YKR080W	MTD1	7	391900	5.335	gfp_specific	5.335	0.0920121	391900	345200	445600	1.28	0.0337559	391900	345200	445600	no	1
YKR080W	MTD1	7	530100	5.325	gfp_specific	5.325	0.0743705	530100	371700	585700	0.61	0.0170331	530100	371700	585700	no	1
YKR080W	MTD1	8	112800	10.105	similar_effect	6.2	-0.0820694	112800	76000	142100	10.105	-0.111806	112800	76000	142100	no	1
YKR080W	MTD1	10	181550	11.5825	similar_effect	8.3375	0.11791	181550	110950	214750	11.5825	0.154144	133300	99300	222150	no	1
YKR080W	MTD1	13	136900	37.8925	gfp_specific	37.8925	0.25096	136900	119750	162000	1.825	-0.046204	136900	119750	162000	no	0
YKR080W	MTD1	14	200700	29.745	gfp_specific	29.745	-0.230954	200700	173850	235250	0.635	-0.0382256	200700	173850	235250	no	1
YKR080W	MTD1	15	742300	5.27	gfp_specific	5.27	0.0976651	742300	691500	820700	2.085	-0.0491211	742300	691500	820700	no	0
YGL055W	OLE1	1	43500	32.6275	gfp_specific	32.6275	-0.285836	43500	0	56150	1.4925	-0.0468192	43500	0	56150	no	1
YGL055W	OLE1	11	325400	15.5	similar_effect	15.5	-0.127433	325400	299800	350100	4.395	-0.067449	442800	346600	465000	no	1
YGL055W	OLE1	11	411000	16.285	gfp_specific	16.285	-0.167628	411000	390500	434200	3.565	-0.0761029	411000	390500	434200	no	1
YGL055W	OLE1	12	655100	67.9725	similar_effect	67.9725	-0.315608	655100	636350	682250	16.4	-0.177587	681850	654550	711200	no	1
YGL055W	OLE1	13	62600	4.8175	opposite_direction	4.8175	0.0904799	62600	0	110050	3.26	-0.0666742	47300	0	87100	no	0
YGL055W	OLE1	15	571950	5.8275	gfp_specific	5.8275	-0.087434	571950	516150	646950	1.585	0.0350797	571950	516150	646950	no	0
YOR293W	RPS10A	2	609500	6.09	mcherry_specific	1.77	-0.0915136	609500	557200	656200	6.09	-0.103307	609500	557200	656200	no	1
YOR293W	RPS10A	3	106400	8.78	gfp_specific	8.78	0.047544	106400	69300	198900	0.61	0.0363804	106400	69300	198900	no	1
YOR293W	RPS10A	4	90300	6.56	mcherry_specific	0.45	-0.0355165	90300	57900	132500	6.56	-0.104817	90300	57900	132500	no	1
YOR293W	RPS10A	11	229900	5.22	similar_effect	4.35	-0.171844	229900	75400	293800	5.22	-0.0884233	213000	140600	299800	no	1
YOR293W	RPS10A	13	88000	22.38	gfp_specific	22.38	0.188022	88000	68300	141100	1.87	-0.0558486	88000	68300	141100	no	0
YOR293W	RPS10A	13	262700	7.92	similar_effect	7.92	0.104052	262700	224500	391200	6.07	0.111327	262700	224500	391200	no	1
YOR293W	RPS10A	14	217700	5.17	gfp_specific	5.17	-0.0974573	217700	126400	329500	2.14	0.0360241	217700	126400	329500	no	0
YOR293W	RPS10A	15	138300	5.18	gfp_specific	5.18	0.077189	138300	108300	181200	1.69	0.0330904	138300	108300	181200	no	1
YOR293W	RPS10A	15	785000	12.98	gfp_specific	12.98	0.0809527	785000	767700	818700	0.48	0.0344026	785000	767700	818700	no	1
YOR293W	RPS10A	16	198900	5.11	mcherry_specific	2.73	0.0768836	198900	165100	249800	5.11	0.0867473	198900	165100	249800	no	1
YLL028W	TPO1	7	123000	7.2625	gfp_specific	7.2625	-0.103416	123000	80450	201050	1.9675	-0.0571448	123000	80450	201050	no	1
YLL028W	TPO1	7	495850	14.355	gfp_specific	14.355	-0.159673	495850	464350	524700	1.1275	-0.0317208	495850	464350	524700	no	1
YLL028W	TPO1	12	682550	31.3	similar_effect	31.3	-0.232287	682550	662700	706050	12.7675	-0.134171	677200	625300	715450	no	1
YLL028W	TPO1	13	63400	7.6425	mcherry_specific	1.5575	-0.0366776	63400	18900	110600	7.6425	-0.114001	63400	18900	110600	no	1
YLL028W	TPO1	15	146300	291.783	similar_effect	291.783	-0.82017	146300	138800	154000	17.3475	-0.155907	144550	103250	177550	no	1
YLL028W	TPO1	15	603300	8.57	gfp_specific	8.57	0.103099	603300	582800	644400	0.78	-0.0191307	603300	582800	644400	no	0
YLL028W	TPO1	15	702200	5.88	gfp_specific	5.88	0.0889108	702200	619900	768700	1.505	-0.0434386	702200	619900	768700	no	0
YKL035W	UGP1	4	76300	4.815	gfp_specific	4.815	-0.0852305	76300	0	132650	3.22167	-0.0656573	76300	0	132650	no	1
YKL035W	UGP1	4	1040200	26.0544	opposite_direction	16.5511	0.173377	1040200	1004567	1091467	26.0544	-0.20555	1071200	1030200	1102333	no	0
YKL035W	UGP1	7	125700	4.76667	gfp_specific	4.76667	0.0998132	125700	106600	182200	0.573333	-0.0196346	125700	106600	182200	no	0
YKL035W	UGP1	10	148567	49.3078	opposite_direction	49.3078	-0.30731	148567	137333	166467	5.21556	0.118297	130133	47300	199233	no	0
YKL035W	UGP1	10	657600	6.8	gfp_specific	6.8	0.0737025	657600	632200	674600	1.33	-0.0439047	657600	632200	674600	no	0
YKL035W	UGP1	12	686367	30.6144	gfp_specific	30.6144	0.241436	686367	653167	724000	1.51111	-0.0365411	686367	653167	724000	no	0
YKL035W	UGP1	13	52033.3	6.01222	mcherry_specific	1.60556	0.0440742	52033	12667	121400	6.01222	-0.102694	52033	12667	121400	no	0
YKL035W	UGP1	13	278733	5.50111	gfp_specific	5.50111	0.0872871	278733	171700	338333	1.27333	0.0294977	278733	171700	338333	no	1
YKL035W	UGP1	15	162767	23.6844	gfp_specific	23.6844	-0.213459	162767	141767	185533	2.61778	-0.0465611	162767	141767	185533	no	1
YGL202W	ARO8	14	468100	46.68	similar_effect	14.585	0.180911	468100	449000	537450	46.68	0.290399	462150	450450	480250	yes	1
YDR099W	BMH2	14	469200	55.9475	mcherry_specific	1.7825	0.0568318	469200	452250	483250	55.9475	0.315886	469200	452250	483250	yes	1
YLR286C	CTS1	14	466700	18.515	mcherry_specific	2.1925	-0.0368242	466700	442350	506550	18.515	0.164685	466700	442350	506550	yes	0
YJR048W	CYC1	14	464050	38.7475	mcherry_specific	1.6075	0.0558682	464050	443150	485250	38.7475	0.273542	464050	443150	485250	yes	1
YDL022W	GPD1	14	524800	57.1703	similar_effect	7.58778	0.109683	524800	468167	576250	57.1703	0.312339	472933	454567	492617	yes	1
YKR080W	MTD1	14	466750	38.7325	mcherry_specific	3.0175	-0.0544164	466750	442600	494250	38.7325	0.264792	466750	442600	494250	yes	0
YGL055W	OLE1	14	465450	25.3425	mcherry_specific	0.2875	-0.00977005	465450	445950	490550	25.3425	0.205207	465450	445950	490550	yes	0
YOR293W	RPS10A	14	471000	32.43	mcherry_specific	1.87	-0.059746	471000	442800	490900	32.43	0.231123	471000	442800	490900	yes	0
YLL028W	TPO1	14	442800	32.6775	similar_effect	13.75	0.155122	442800	415200	472650	32.6775	0.245897	469400	448900	488600	yes	1
YKL035W	UGP1	14	484300	29.3289	similar_effect	14.6144	0.166145	484300	449400	509733	29.3289	0.244093	483333	457800	500667	yes	1
