# Supplementary material for: Simultaneous quantification of mRNA and protein in single cells reveals post-transcriptional effects of genetic variation
Source: eLife journal article supplement (doi:10.7554/elife.60645), 2020-11-16
Supplement: supp [file elife-60645-supp-v1.zip › elife_poa_e60645_Figure_7_source_data_1.xlsx]

## Sheet: Sheet1
SourceData_07_1: Differential expression analysis of RNA abundance of BY YAK1-Q578* compared to BY YAK1-WT
sysname	name	chromosome	position_up	position_down	strand	alias	annotation	mean_exp	log2FC	pval	BH_padj
YJL116C	NCA3	10	193860	194873	C	SUN family protein NCA3	Protein involved in mitochondrion organization; functions with Nca2p to regulate mitochondrial expression of subunits 6 (Atp6p) and 8 (Atp8p) of the Fo-F1 ATP synthase; SWAT-GFP, seamless-GFP and mCherry fusion proteins localize to the vacuole; member of the SUN family; expression induced in cells treated with the mycotoxin patulin; NCA3 has a paralog, UTH1, that arose from the whole genome dupli…	464.55	-0.772039	5.32645e-43	3.06537e-39
YCL064C	CHA1	3	15798	16880	C	L-serine/L-threonine ammonia-lyase CHA1	Catabolic L-serine (L-threonine) deaminase; catalyzes the degradation of both L-serine and L-threonine; required to use serine or threonine as the sole nitrogen source, transcriptionally induced by serine and threonine	1842.71	-0.645938	8.41297e-40	2.42083e-36
YER096W	SHC1	5	351698	353236	W		Sporulation-specific activator of Chs3p (chitin synthase III); required for the synthesis of the chitosan layer of ascospores; transcriptionally induced at alkaline pH; SHC1 has a paralog, SKT5, that arose from the whole genome duplication	208.073	-0.526336	1.34452e-17	5.52695e-15
YDR342C	HXT7	4	1154216	1155928	C	hexose transporter HXT7	High-affinity glucose transporter; member of the major facilitator superfamily, nearly identical to Hxt6p, expressed at high basal levels relative to other HXTs, expression repressed by high glucose levels; HXT7 has a paralog, HXT4, that arose from the whole genome duplication	4689.33	-0.505276	6.37646e-15	1.93139e-12
YMR169C	ALD3	13	599352	600872	C	aldehyde dehydrogenase (NAD(+)) ALD3	Cytoplasmic aldehyde dehydrogenase; involved in beta-alanine synthesis; uses NAD+ as the preferred coenzyme; very similar to Ald2p; expression is induced by stress and repressed by glucose	689.619	-0.505163	2.00001e-18	9.59169e-16
YBR117C	TKL2	2	474392	476437	C	transketolase TKL2	Transketolase; catalyzes conversion of xylulose-5-phosphate and ribose-5-phosphate to sedoheptulose-7-phosphate and glyceraldehyde-3-phosphate in the pentose phosphate pathway; needed for synthesis of aromatic amino acids; TKL2 has a paralog, TKL1, that arose from the whole genome duplication	113.775	-0.501874	1.15489e-14	3.16494e-12
YDL222C	FMP45	4	60872	61801	C		Integral membrane protein localized to mitochondria; required for sporulation and maintaining sphingolipid content; similar to SUR7; FMP45 has a paralog, YNL194C, that arose from the whole genome duplication	151.855	-0.490715	3.2539e-14	8.5119e-12
YHR096C	HXT5	8	294669	296447	C	hexose transporter HXT5	Hexose transporter with moderate affinity for glucose; induced in the presence of non-fermentable carbon sources, induced by a decrease in growth rate, contains an extended N-terminal domain relative to other HXTs; HXT5 has a paralog, HXT3, that arose from the whole genome duplication	95.7424	-0.473927	7.51323e-14	1.80161e-11
YGR088W	CTT1	7	654634	656322	W	catalase T|SPS101	Cytosolic catalase T; has a role in protection from oxidative damage by hydrogen peroxide	1299.58	-0.434671	8.68093e-15	2.49794e-12
YFL014W	HSP12	6	107256	107585	W	lipid-binding protein HSP12|HOR5|GLP1	Plasma membrane protein involved in maintaining membrane organization; involved in maintaining organization during stress conditions; induced by heat shock, oxidative stress, osmostress, stationary phase, glucose depletion, oleate and alcohol; protein abundance increased in response to DNA replication stress and dietary restriction; regulated by the HOG and Ras-Pka pathways; required for dietary …	5006.85	-0.431356	8.40488e-13	1.61234e-10
YIR038C	GTT1	9	423809	424513	C	bifunctional glutathione transferase/peroxidase	ER associated glutathione S-transferase; capable of homodimerization; glutathione transferase for Yvc1p vacuolar cation channel; expression induced during the diauxic shift and throughout stationary phase; functional overlap with Gtt2p, Grx1p, and Grx2p	2022.93	-0.425782	1.00671e-25	1.15872e-22
YDR216W	ADR1	4	895035	899006	W	DNA-binding transcription factor ADR1	Carbon source-responsive zinc-finger transcription factor; required for transcription of the glucose-repressed gene ADH2, of peroxisomal protein genes, and of genes required for ethanol, glycerol, and fatty acid utilization	2151.49	-0.423474	3.76275e-16	1.44364e-13
YKL096W-A	CWP2	11	259253	259531	W	YKL097W-A|LPR1	Covalently linked cell wall mannoprotein; major constituent of the cell wall; plays a role in stabilizing the cell wall; involved in low pH resistance; precursor is GPI-anchored	36573.7	-0.417215	8.07503e-19	4.22471e-16
YGR256W	GND2	7	1004624	1006102	W	phosphogluconate dehydrogenase (decarboxylating) GND2	6-phosphogluconate dehydrogenase (decarboxylating); catalyzes an NADPH regenerating reaction in the pentose phosphate pathway; required for growth on D-glucono-delta-lactone; GND2 has a paralog, GND1, that arose from the whole genome duplication	324.079	-0.392074	2.94195e-11	4.50807e-09
YLR264W	RPS28B	12	673131	673334	W	eS28|ribosomal 40S subunit protein S28B|S28e|YS27|S33B|S28B|RPS33B	Protein component of the small (40S) ribosomal subunit; homologous to mammalian ribosomal protein S28, no bacterial homolog; has an extraribosomal function in autoregulation, in which Rps28Bp binds to a decapping complex via Edc3p, which then binds to RPS28B mRNA leading to its decapping and degradation; RPS28B has a paralog, RPS28A, that arose from the whole genome duplication	1012.94	-0.390349	1.28411e-12	2.3094e-10
YER062C	GPP2	5	279930	280682	C	HOR2|glycerol-1-phosphatase HOR2	DL-glycerol-3-phosphate phosphatase involved in glycerol biosynthesis; also known as glycerol-1-phosphatase; induced in response to hyperosmotic or oxidative stress, and during diauxic shift; GPP2 has a paralog, GPP1, that arose from the whole genome duplication	5717.38	-0.389264	1.99019e-13	4.24206e-11
YML128C	MSC1	13	15135	16676	C		Protein of unknown function; mutant is defective in directing meiotic recombination events to homologous chromatids; the authentic, non-tagged protein is detected in highly purified mitochondria and is phosphorylated	3045.87	-0.384564	3.3938e-09	3.42655e-07
YOR032C	HMS1	15	389771	391075	C		bHLH protein with similarity to myc-family transcription factors; overexpression confers hyperfilamentous growth and suppresses the pseudohyphal filamentation defect of a diploid mep1 mep2 homozygous null mutant	37.8211	-0.380549	4.88785e-11	7.03239e-09
YKL096W	CWP1	11	261132	261851	W	YJU1	Cell wall mannoprotein that localizes to birth scars of daughter cells; linked to a beta-1,3- and beta-1,6-glucan heteropolymer through a phosphodiester bond; required for propionic acid resistance	5185.17	-0.372496	1.43495e-12	2.50247e-10
YNL141W	AAH1	14	359596	360639	W	adenine deaminase	Adenine deaminase (adenine aminohydrolase); converts adenine to hypoxanthine; involved in purine salvage; transcriptionally regulated by nutrient levels and growth phase; Aah1p degraded upon entry into quiescence via SCF and the proteasome	7977.06	-0.367657	2.32202e-24	2.2272e-21
YIL099W	SGA1	9	178004	179653	W	glucan 1,4-alpha-glucosidase	Intracellular sporulation-specific glucoamylase; involved in glycogen degradation; induced during starvation of a/a diploids late in sporulation, but dispensable for sporulation	108.817	-0.361475	2.5525e-08	2.04023e-06
YKR013W	PRY2	11	463959	464948	W	sterol-binding protein|YFW12	Sterol binding protein involved in the export of acetylated sterols; secreted glycoprotein and member of the CAP protein superfamily (cysteine-rich secretory proteins (CRISP), antigen 5, and pathogenesis related 1 proteins); sterol export function is redundant with that of PRY1; may be involved in detoxification of hydrophobic compounds; PRY2 has a paralog, PRY1, that arose from the whole genome …	8106.06	-0.353225	8.46986e-20	4.87441e-17
YOR161C	PNS1	15	636939	638558	C		Protein of unknown function; has similarity to Torpedo californica tCTL1p, which is postulated to be a choline transporter, neither null mutation nor overexpression affects choline transport	3135.98	-0.349789	5.10237e-14	1.2767e-11
YGL121C	GPG1	7	280777	281157	C		Proposed gamma subunit of the heterotrimeric G protein; interacts with the receptor Gpr1p; involved in regulation of pseudohyphal growth; requires Gpb1p or Gpb2p to interact with Gpa2p; overproduction causes prion curing	104.671	-0.344851	9.88474e-08	6.9374e-06
YOL151W	GRE2	15	43694	44722	W	methylglyoxal reductase (NADPH-dependent) GRE2	3-methylbutanal reductase and NADPH-dependent methylglyoxal reductase; stress induced (osmotic, ionic, oxidative, heat shock and heavy metals); regulated by the HOG pathway; restores resistance to glycolaldehyde by coupling reduction of glycolaldehyde to ethylene glycol and oxidation of NADPH to NADP+; protein abundance increases in response to DNA replication stress; methylglyoxal reductase (NAD…	2849.88	-0.340219	1.66277e-20	1.19616e-17
YIL011W	TIR3	9	333727	334536	W	YIB1	Cell wall mannoprotein; member of Srp1p/Tip1p family of serine-alanine-rich proteins; expressed under anaerobic conditions and required for anaerobic growth; TIR3 has a paralog, TIR2, that arose from the whole genome duplication	388.231	-0.334736	1.60584e-09	1.7437e-07
YGR043C	NQM1	7	580435	581436	C	sedoheptulose-7-phosphate:D-glyceraldehyde-3-phosphate transaldolase NQM1	Transaldolase of unknown function; transcription is repressed by Mot1p and induced by alpha-factor and during diauxic shift; NQM1 has a paralog, TAL1, that arose from the whole genome duplication	356.625	-0.325151	1.14705e-08	9.56706e-07
YDR133C	YDR133C	4	720962	721297	C		Dubious open reading frame; unlikely to encode a functional protein, based on available experimental and comparative sequence data; partially overlaps YDR134C	3273.93	-0.325123	1.11974e-12	2.07875e-10
YDR070C	FMP16	4	588098	588379	C		Protein of unknown function; may be involved in responding to conditions of stress; the authentic, non-tagged protein is detected in highly purified mitochondria in high-throughput studies; protein abundance increases in response to DNA replication stress	63.9367	-0.315781	6.06801e-07	3.42367e-05
YJL079C	PRY1	10	289875	290774	C	sterol-binding protein	Sterol binding protein involved in the export of acetylated sterols; secreted glycoprotein and member of the CAP protein superfamily (cysteine-rich secretory proteins (CRISP), antigen 5, and pathogenesis related 1 proteins); sterol export function is redundant with that of PRY2; may be involved in detoxification of hydrophobic compounds; PRY1 has a paralog, PRY2, that arose from the whole genome …	3207.75	-0.311372	4.06584e-10	4.97849e-08
YJL163C	YJL163C	10	111666	113333	C		Putative protein of unknown function	375.558	-0.306809	3.03853e-07	1.90073e-05
YNL160W	YGP1	14	336545	337609	W		Cell wall-related secretory glycoprotein; induced by nutrient deprivation-associated growth arrest and upon entry into stationary phase; may be involved in adaptation prior to stationary phase entry; YGP1 has a paralog, SPS100, that arose from the whole genome duplication	14460.8	-0.291849	5.45005e-06	0.000248929
YDR461C-A	YDR461C-A	4	1385524	1385766	C		Putative protein of unknown function	133.11	-0.2913	6.51761e-06	0.000290766
YGL038C	OCH1	7	425362	426804	C	LDB12|NGD29	Mannosyltransferase of the cis-Golgi apparatus; initiates the polymannose outer chain elongation of N-linked oligosaccharides of glycoproteins	3023.35	-0.286279	1.24937e-13	2.76544e-11
YEL048C	TCA17	5	64709	65167	C		Component of transport protein particle (TRAPP) complex II; TRAPPII is a multimeric guanine nucleotide-exchange factor for the GTPase Ypt1p, regulating intra-Golgi and endosome-Golgi traffic; promotes association of TRAPPII-specific subunits with the TRAPP core complex; sedlin related; human Sedlin mutations cause SEDT, a skeletal disorder	451.024	-0.283723	1.03944e-06	5.43816e-05
YDL169C	UGX2	4	158064	158735	C		Protein of unknown function; transcript accumulates in response to any combination of stress conditions	127.526	-0.265104	4.21751e-05	0.00141115
YHR092C	HXT4	8	287081	288811	C	hexose transporter HXT4|RAG1|LGT1	High-affinity glucose transporter; member of the major facilitator superfamily, expression is induced by low levels of glucose and repressed by high levels of glucose; HXT4 has a paralog, HXT7, that arose from the whole genome duplication	1156.95	-0.258355	5.49912e-05	0.00174848
YLR185W	RPL37A	12	522663	523288	W	eL37|ribosomal 60S subunit protein L37A|L37e|YL35|L43|L37A	Ribosomal 60S subunit protein L37A; required for processing of 27SB pre-rRNA and formation of stable 66S assembly intermediates; homologous to mammalian ribosomal protein L37, no bacterial homolog; RPL37A has a paralog, RPL37B, that arose from the whole genome duplication	8206.82	-0.252501	9.55256e-08	6.78703e-06
YDR222W	YDR222W	4	910054	911301	W		Protein of unknown function; green fluorescent protein (GFP)-fusion protein localizes to the cytoplasm in a punctate pattern; YDR222W has a paralog, YLR225C, that arose from the whole genome duplication	3626.37	-0.252487	1.83734e-05	0.000719313
YOL143C	RIB4	15	54595	55104	C	lumazine synthase RIB4	Lumazine synthase (DMRL synthase); catalyzes synthesis of immediate precursor to riboflavin; DMRL synthase stands for 6,7-dimethyl-8-ribityllumazine synthase	13350.4	-0.251212	1.39013e-09	1.60004e-07
YOR374W	ALD4	15	1039840	1041399	W	aldehyde dehydrogenase (NADP(+)) ALD4|ALDH2|ALD7	Mitochondrial aldehyde dehydrogenase; required for growth on ethanol and conversion of acetaldehyde to acetate; phosphorylated; activity is K+ dependent; utilizes NADP+ or NAD+ equally as coenzymes; expression is glucose repressed; can substitute for cytosolic NADP-dependent aldehyde dehydrogenase when directed to the cytosol; human homolog ALDH2 can complement yeast ald4 mutant	3740.46	-0.249877	5.98294e-07	3.40909e-05
YEL011W	GLC3	5	133120	135234	W	1,4-alpha-glucan branching enzyme|GHA1	Glycogen branching enzyme, involved in glycogen accumulation; green fluorescent protein (GFP)-fusion protein localizes to the cytoplasm in a punctate pattern; relocalizes from nucleus to cytoplasmic foci upon DNA replication stress; glycogen accumulation defect of the null mutant is functionally complemented by human GBE1, which is associated with glycogen storage disease	496.611	-0.249047	9.57712e-06	0.000399394
YER039C	HVG1	5	228456	229205	C	putative GDP-mannose transporter|YEM9	Protein of unknown function; HVG1 has a paralog, VRG4, that arose from the whole genome duplication	154.771	-0.248682	0.000104512	0.00275903
YIL055C	YIL055C	9	252042	253925	C		Putative protein of unknown function	368.805	-0.247202	2.37352e-05	0.000884296
YJR094W-A	RPL43B	10	608305	608858	W	eL43|ribosomal 60S subunit protein L43B|L43e|L43B	Ribosomal 60S subunit protein L43B; homologous to mammalian ribosomal protein L37A, no bacterial homolog; RPL43B has a paralog, RPL43A, that arose from the whole genome duplication; protein abundance increases in response to DNA replication stress	10361.5	-0.240681	8.99849e-06	0.000383602
YNL142W	MEP2	14	357453	358952	W	ammonium permease MEP2	Ammonium permease involved in regulation of pseudohyphal growth; belongs to a ubiquitous family of cytoplasmic membrane proteins that transport only ammonium (NH4+); expression is under the nitrogen catabolite repression regulation	742.469	-0.239169	3.03613e-07	1.90073e-05
YNL300W	TOS6	14	65744	66052	W		Glycosylphosphatidylinositol-dependent cell wall protein; expression is periodic and decreases in respone to ergosterol perturbation or upon entry into stationary phase; depletion increases resistance to lactic acid	1202.92	-0.238931	4.3096e-08	3.3069e-06
YCL012C	YCL012C	3	101317	101788	C	YCL011C-A	Protein of unknown function; SWAT-GFP and mCherry fusion proteins localize to the endoplasmic reticulum and vacuole respectively; orthologs are present in S. bayanus, S. paradoxus and Ashbya gossypii; YCL012C is not an essential gene	477.165	-0.238106	1.20698e-05	0.000492635
YLR304C	ACO1	12	735212	737548	C	aconitate hydratase ACO1|GLU1	Aconitase; required for the tricarboxylic acid (TCA) cycle and also independently required for mitochondrial genome maintenance; component of the mitochondrial nucleoid; mutation leads to glutamate auxotrophy; human homolog ACO2 can complement yeast null mutant	16065.2	-0.237821	5.55118e-08	4.14896e-06
YLR035C-A	NA	NA	NA	NA	NA	NA	NA	6362.48	-0.236257	0.00023673	0.00516328
YDR134C	NA	NA	NA	NA	NA	NA	NA	7632.83	-0.235299	1.08126e-10	1.48158e-08
YOL122C	SMF1	15	89692	91419	C	divalent metal ion transporter SMF1|SBS1	Divalent metal ion transporter; broad specificity for di-valent and tri-valent metals; post-translationally regulated by levels of metal ions; member of the Nramp family of metal transport proteins	3523.48	-0.232244	5.19159e-13	1.06706e-10
YJL158C	CIS3	10	122265	122948	C	SCW8|CCW5|PIR4|CCW11	Mannose-containing glycoprotein constituent of the cell wall; member of the PIR (proteins with internal repeats) family	17564.2	-0.229667	1.47819e-09	1.64581e-07
YKL156W	RPS27A	11	158613	159212	W	eS27|ribosomal 40S subunit protein S27A|S27e|rp61|YS20|S27A	Protein component of the small (40S) ribosomal subunit; homologous to mammalian ribosomal protein S27, no bacterial homolog; RPS27A has a paralog, RPS27B, that arose from the whole genome duplication; protein abundance increases in response to DNA replication stress	6467.64	-0.224431	3.2113e-05	0.0011257
YPL222W	FMP40	16	130162	132228	W		Putative protein of unknown function; proposed to be involved in responding to environmental stresses; the authentic, non-tagged protein is detected in highly purified mitochondria in high-throughput studies	1074.22	-0.222402	4.60949e-06	0.000217439
YLR121C	YPS3	12	388744	390270	C	aspartyl protease|YPS4	Aspartic protease; member of the yapsin family of proteases involved in cell wall growth and maintenance; attached to the plasma membrane via a glycosylphosphatidylinositol (GPI) anchor	870.657	-0.219259	0.000136733	0.00346651
YPL061W	ALD6	16	432588	434090	W	aldehyde dehydrogenase (NADP(+)) ALD6|ALD1	Cytosolic aldehyde dehydrogenase; activated by Mg2+ and utilizes NADP+ as the preferred coenzyme; required for conversion of acetaldehyde to acetate; constitutively expressed; locates to the mitochondrial outer surface upon oxidative stress	26522.1	-0.218932	6.76764e-11	9.49945e-09
YDR077W	SED1	4	600793	601809	W		Major stress-induced structural GPI-cell wall glycoprotein; associates with translating ribosomes, possible role in mitochondrial genome maintenance; ORF contains two distinct variable minisatellites; SED1 has a paralog, SPI1, that arose from the whole genome duplication	48657.4	-0.218555	2.60469e-05	0.000942768
YHR106W	TRR2	8	325598	326626	W	thioredoxin-disulfide reductase TRR2	Mitochondrial thioredoxin reductase; involved in protection against oxidative stress, required with Glr1p to maintain the redox state of Trx3p; contains active-site motif (CAVC) present in prokaryotic orthologs; binds NADPH and FAD; TRR2 has a paralog, TRR1, that arose from the whole genome duplication	1260.75	-0.217128	1.96497e-08	1.59274e-06
YMR173W-A	YMR173W-A	13	608897	610081	W		Dubious open reading frame; unlikely to encode a functional protein, based on available experimental and comparative sequence data; overlaps the verified gene DDR48/YML173W	4896.69	-0.216899	1.17959e-05	0.000484896
YOR305W	RRG7	15	889022	889750	W		Protein of unknown function; green fluorescent protein (GFP)-fusion protein localizes to the mitochondrion; deletion confers sensitivity to 4-(N-(S-glutathionylacetyl)amino) phenylarsenoxide (GSAO); YOR305W is not an essential gene	1575.82	-0.21532	6.72759e-09	5.86626e-07
YDR277C	MTH1	4	1014401	1015702	C	HTR1|DGT1|BPC1	Negative regulator of the glucose-sensing signal transduction pathway; required for repression of transcription by Rgt1p; interacts with Rgt1p and the Snf3p and Rgt2p glucose sensors; phosphorylated by Yck1p, triggering Mth1p degradation; MTH1 has a paralog, STD1, that arose from the whole genome duplication	299.195	-0.214664	0.000851084	0.0138361
YDL085W	NDE2	4	303211	304848	W	NADH-ubiquinone reductase (H(+)-translocating) NDE2|NDH2	Mitochondrial external NADH dehydrogenase; catalyzes the oxidation of cytosolic NADH; Nde1p and Nde2p are involved in providing the cytosolic NADH to the mitochondrial respiratory chain; NDE2 has a paralog, NDE1, that arose from the whole genome duplication	110.157	-0.214165	0.00100428	0.0155821
YDR500C	RPL37B	4	1450198	1450853	C	eL37|ribosomal 60S subunit protein L37B|L37e|YL35|L43|L37B	Ribosomal 60S subunit protein L37B; required for processing of 27SB pre-rRNA and formation of stable 66S assembly intermediates; protein abundance increases in response to DNA replication stress; homologous to mammalian ribosomal protein L37, no bacterial homolog; RPL37B has a paralog, RPL37A, that arose from the whole genome duplication	15182.3	-0.208963	6.93512e-05	0.00211173
YNL015W	PBI2	14	605384	605611	W	IB2|I2B|LMA1	Cytosolic inhibitor of vacuolar proteinase B (PRB1); required for efficient vacuole inheritance; with thioredoxin forms protein complex LMA1, which assists in priming SNARE molecules and promotes vacuole fusion; protein abundance increases in response to DNA replication stress	791.014	-0.207984	1.47804e-06	7.59474e-05
YOR045W	TOM6	15	413852	414037	W	MOM8B|ISP6	Component of the TOM (translocase of outer membrane) complex; responsible for recognition and initial import steps for all mitochondrially directed proteins; promotes assembly and stability of the TOM complex	168.179	-0.20726	0.00144197	0.020375
YDL049C	KNH1	4	365068	365874	C		Protein with similarity to Kre9p; Kre9p is involved in cell wall beta 1,6-glucan synthesis; overproduction suppresses growth defects of a kre9 null mutant; required for propionic acid resistance	644.699	-0.206632	7.00579e-05	0.00212202
YNL237W	YTP1	14	205188	206567	W		Probable type-III integral membrane protein of unknown function; has regions of similarity to mitochondrial electron transport proteins	138.483	-0.204909	0.001456	0.0204372
YKL216W	URA1	11	25215	26159	W	dihydroorotate dehydrogenase	Dihydroorotate dehydrogenase; catalyzes the fourth enzymatic step in the de novo biosynthesis of pyrimidines, converting dihydroorotic acid into orotic acid	45625.9	-0.202743	4.04004e-08	3.18499e-06
YCL057C-A	MIC10	3	24032	24325	C	MOS1|MCS10|MIO10	Conserved component of the MICOS complex; MICOS (formerly MINOS or MitOS) is a mitochondrial inner membrane complex that extends into the intermembrane space and has a role in the maintenance of crista junctions, inner membrane architecture, and formation of contact sites to the outer membrane; forms a subcomplex with Mic12p and Mic27p whose assembly and stability requires cardiolipin; homo-oligo…	1115.01	-0.20076	7.61727e-05	0.00222525
YKR057W	RPS21A	11	551657	552242	W	eS21|ribosomal 40S subunit protein S21A|S21e|YS25|S26A|S21A|RPS25	Protein component of the small (40S) ribosomal subunit; homologous to mammalian ribosomal protein S21, no bacterial homolog; RPS21A has a paralog, RPS21B, that arose from the whole genome duplication	9927.04	-0.199742	0.000118139	0.00305901
YDL130W	RPP1B	4	229906	230527	W	ribosomal protein P1B|YP1beta|P1B|L44'|Ax|RPLA3|RPL44'	Ribosomal protein P1 beta; component of the ribosomal stalk, which is involved in interaction of translational elongation factors with ribosome; free (non-ribosomal) P1 stimulates the phosphorylation of the eIF2 alpha subunit (Sui2p) by Gcn2p; accumulation is regulated by phosphorylation and interaction with the P2 stalk component	20242.8	-0.199307	5.29909e-09	4.84068e-07
YPL223C	GRE1	16	128632	129138	C		Hydrophilin essential in desiccation-rehydration process; stress induced (osmotic, ionic, oxidative, heat shock and heavy metals); regulated by the HOG pathway; GRE1 has a paralog, SIP18, that arose from the whole genome duplication	49.2656	-0.198573	0.00132389	0.0191432
YBR006W	UGA2	2	247010	248503	W	succinate-semialdehyde dehydrogenase (NAD(P)(+))|UGA5	Succinate semialdehyde dehydrogenase; involved in the utilization of gamma-aminobutyrate (GABA) as a nitrogen source; part of the 4-aminobutyrate and glutamate degradation pathways; localized to the cytoplasm	1461.68	-0.198373	8.79774e-06	0.000377843
YLR343W	GAS2	12	816094	817761	W	1,3-beta-glucanosyltransferase	1,3-beta-glucanosyltransferase; involved with Gas4p in spore wall assembly; has similarity to Gas1p	212.062	-0.197867	0.00153384	0.0209693
YJL185C	ATG36	10	82095	82976	C		Pex3p interacting protein, required for pexophagy; interacts with Atg8p and Atg11p; mRNA is weakly cell cycle regulated, peaking in G2 phase; YJL185C is a non-essential gene	349.01	-0.197545	0.000476625	0.00890576
YOR210W	RPB10	15	738320	738532	W	DNA-directed RNA polymerase core subunit RPB10|ABC10-beta	RNA polymerase subunit ABC10-beta; common to RNA polymerases I, II, and III	913.343	-0.196025	0.00117891	0.0174143
YNL302C	RPS19B	14	61958	62943	C	eS19|ribosomal 40S subunit protein S19B|S19e|rp55B|YS16B|S19B|S16aB|RP55B	Protein component of the small (40S) ribosomal subunit; required for assembly and maturation of pre-40 S particles; homologous to mammalian ribosomal protein S19, no bacterial homolog; mutations in human RPS19 are associated with Diamond Blackfan anemia; RPS19B has a paralog, RPS19A, that arose from the whole genome duplication	39393.4	-0.194931	3.13219e-05	0.00110588
YOL083W	ATG34	15	165714	166952	W	ATG19-B	Receptor protein involved in selective autophagy during starvation; specifically involved in the transport of cargo protein alpha-mannosidase (Ams1p); Atg19p paralog	440.477	-0.194136	0.000331963	0.00667989
YMR173W	DDR48	13	608689	609981	W	DNA damage-responsive protein 48|FSP	DNA damage-responsive protein; expression is increased in response to heat-shock stress or treatments that produce DNA lesions; contains multiple repeats of the amino acid sequence NNNDSYGS; protein abundance increases in response to DNA replication stress	11997.5	-0.19408	6.33167e-05	0.00196511
YAR009C	NA	NA	NA	NA	NA	NA	NA	25327.2	-0.193897	0.000273697	0.00574864
YGL030W	RPL30	7	439091	439638	W	eL30|ribosomal 60S subunit protein L30|L30e|rp73|YL38|L32|L30	Ribosomal 60S subunit protein L30; involved in pre-rRNA processing in the nucleolus; autoregulates splicing of its transcript; homologous to mammalian ribosomal protein L30, no bacterial homolog	32186.5	-0.190995	0.000103012	0.00273196
YOR248W	YOR248W	15	798013	798315	W	TOS11	Dubious open reading frame; unlikely to encode a functional protein, based on available experimental and comparative sequence data	2618.48	-0.190033	2.32926e-06	0.000114572
YIL053W	GPP1	9	255115	255867	W	RHR2|glycerol-1-phosphatase RHR2	Constitutively expressed DL-glycerol-3-phosphate phosphatase; also known as glycerol-1-phosphatase; involved in glycerol biosynthesis, induced in response to both anaerobic and osmotic stress; GPP1 has a paralog, GPP2, that arose from the whole genome duplication	54124	-0.189947	1.58251e-07	1.04682e-05
YDL055C	PSA1	4	355674	356759	C	mannose-1-phosphate guanylyltransferase|SRB1|VIG9|MPG1	GDP-mannose pyrophosphorylase (mannose-1-phosphate guanyltransferase); synthesizes GDP-mannose from GTP and mannose-1-phosphate in cell wall biosynthesis; required for normal cell wall structure	73586.6	-0.185412	5.05737e-08	3.82963e-06
YDL181W	INH1	4	135179	135436	W	ATPase inhibitor	Protein that inhibits ATP hydrolysis by the F1F0-ATP synthase; inhibitory function is enhanced by stabilizing proteins Stf1p and Stf2p; has a calmodulin-binding motif and binds calmodulin in vitro; INH1 has a paralog, STF1, that arose from the whole genome duplication	362.589	-0.185108	0.00395676	0.0423255
YER153C	PET122	5	474041	474805	C		Mitochondrial translational activator specific for the COX3 mRNA; acts together with Pet54p and Pet494p; located in the mitochondrial inner membrane	448.819	-0.183558	0.000361954	0.00710999
YLR388W	RPS29A	12	898651	898821	W	uS14|ribosomal 40S subunit protein S29A|S14|YS29|S36A|S29A|YS29A	Protein component of the small (40S) ribosomal subunit; homologous to mammalian ribosomal protein S29 and bacterial S14; RPS29A has a paralog, RPS29B, that arose from the whole genome duplication	143.34	-0.182938	0.00480702	0.0487617
YGL156W	AMS1	7	210416	213667	W	alpha-mannosidase	Vacuolar alpha mannosidase; involved in free oligosaccharide (fOS) degradation; delivered to the vacuole in a novel pathway separate from the secretory pathway	775.646	-0.182859	0.000470296	0.00884494
YPR054W	SMK1	16	666280	667446	W	mitogen-activated protein kinase SMK1	Middle sporulation-specific mitogen-activated protein kinase (MAPK); required for production of the outer spore wall layers; negatively regulates activity of the glucan synthase subunit Gsc2p	39.7516	-0.182107	0.0021147	0.0272261
YMR305C	SCW10	13	879063	880232	C	putative family 17 glucosidase	Cell wall protein with similarity to glucanases; may play a role in conjugation during mating based on mutant phenotype and its regulation by Ste12p; SWC10 has a paralog, SCW4, that arose from the whole genome duplication	20406.2	-0.181469	5.18977e-09	4.81728e-07
YPR159W	KRE6	16	857583	859745	W	beta-glucan synthesis-associated protein KRE6|CWH48	Type II integral membrane protein; required for beta-1,6 glucan biosynthesis; putative beta-glucan synthase; localizes to ER, plasma membrane, sites of polarized growth and secretory vesicles; functionally redundant with Skn1p; KRE6 has a paralog, SKN1, that arose from the whole genome duplication	11206.1	-0.180341	4.57566e-15	1.46294e-12
YKR093W	PTR2	11	615730	617535	W		Integral membrane peptide transporter; mediates transport of di- and tri-peptides; conserved protein that contains 12 transmembrane domains; PTR2 expression is regulated by the N-end rule pathway via repression by Cup9p	350.031	-0.179715	0.00254259	0.0310013
YKL121W	DGR2	11	214142	216700	W		Protein of unknown function; null mutant is resistant to 2-deoxy-D-glucose and displays abnormally elongated buds; DGR2 has a paralog, YMR102C, that arose from the whole genome duplication	528.825	-0.179509	0.00239719	0.0299259
YBL018C	POP8	2	185998	186474	C	ribonuclease P	Subunit of both RNase MRP and nuclear RNase P; RNase MRP cleaves pre-rRNA, while nuclear RNase P cleaves tRNA precursors to generate mature 5' ends and facilitates turnover of nuclear RNAs; relocalizes to the cytosol in response to hypoxia	903.368	-0.179219	0.000584434	0.0104779
YBR058C-A	TSC3	2	356324	356566	C		Protein that stimulates the activity of serine palmitoyltransferase; involved in sphingolipid biosynthesis; Lcb1p and Lcb2p are the two components of serine palmitoyltransferase	501.033	-0.178025	0.00550862	0.0539152
YHL026C	YHL026C	8	53219	54166	C		Putative protein of unknown function; transcriptionally regulated by Upc2p via an upstream sterol response element; SWAT-GFP fusion protein localizes to the cell periphery, while mCherry fusion localizes to both the cell periphery and vacuole; YHL026C is not an essential gene; in 2005 the start site was moved 141 nt upstream (see Locus History)	762.181	-0.177883	0.000115188	0.00299957
YNL289W	PCL1	14	87897	88736	W	HCS26	Cyclin, interacts with cyclin-dependent kinase Pho85p; member of the Pcl1,2-like subfamily, involved in the regulation of polarized growth and morphogenesis and progression through the cell cycle; is ubiquitinated by Dma1p; phosphorylation by Pho85p targets it for degradation; localizes to sites of polarized cell growth	1689.03	-0.176446	9.94229e-05	0.00267373
YDL227C	HO	4	46271	48031	C		Site-specific endonuclease; required for gene conversion at the MAT locus (homothallic switching) through the generation of a ds DNA break; expression restricted to mother cells in late G1 as controlled by Swi4p-Swi6p, Swi5p, and Ash1p	6113.42	-0.176363	4.51061e-10	5.40803e-08
YBL003C	HTA2	2	235394	235792	C	histone H2A|H2A2	Histone H2A; core histone protein required for chromatin assembly and chromosome function; one of two nearly identical (see also HTA1) subtypes; DNA damage-dependent phosphorylation by Mec1p facilitates DNA repair; acetylated by Nat4p	13573.2	-0.17628	1.47182e-05	0.000588217
YPL163C	SVS1	16	241918	242700	C		Cell wall and vacuolar protein; required for wild-type resistance to vanadate; SVS1 has a paralog, SRL1, that arose from the whole genome duplication	5223.38	-0.174834	7.14996e-06	0.000314107
YLR420W	URA4	12	963785	964879	W	dihydroorotase	Dihydroorotase; catalyzes the third enzymatic step in the de novo biosynthesis of pyrimidines, converting carbamoyl-L-aspartate into dihydroorotate	13966.4	-0.174796	1.54014e-07	1.03064e-05
YGL135W	RPL1B	7	254641	255294	W	uL1|ribosomal 60S subunit protein L1B|L1|L1B|SSM2	Ribosomal 60S subunit protein L1B; N-terminally acetylated; homologous to mammalian ribosomal protein L10A and bacterial L1; RPL1B has a paralog, RPL1A, that arose from the whole genome duplication; rpl1a rpl1b double null mutation is lethal	65239.4	-0.174759	8.19433e-05	0.00231168
YML027W	YOX1	13	221406	222563	W		Homeobox transcriptional repressor; binds to Mcm1p and to early cell cycle boxes (ECBs) in the promoters of cell cycle-regulated genes expressed in M/G1 phase; expression is cell cycle-regulated; phosphorylated by Cdc28p; relocalizes from nucleus to cytoplasm upon DNA replication stress; YOX1 has a paralog, YHP1, that arose from the whole genome duplication	1167.83	-0.173383	0.000123287	0.00316748
YPL024W	RMI1	16	503517	504242	W	NCE4	Subunit of the RecQ (Sgs1p) - Topo III (Top3p) complex; stimulates superhelical relaxing, DNA catenation/decatenation and ssDNA binding activities of Top3p; involved in response to DNA damage; functions in S phase-mediated cohesion establishment via a pathway involving the Ctf18-RFC complex and Mrc1p; stimulates Top3p DNA catenation/decatenation activity; null mutants display increased rates of r…	927.641	-0.172912	6.6957e-05	0.00206063
YPR132W	RPS23B	16	794965	795767	W	uS12|ribosomal 40S subunit protein S23B|rp37|YS14|S28B|S23B|S12	Ribosomal protein 28 (rp28) of the small (40S) ribosomal subunit; required for translational accuracy; homologous to mammalian ribosomal protein S23 and bacterial S12; RPS23B has a paralog, RPS23A, that arose from the whole genome duplication; deletion of both RPS23A and RPS23B is lethal	44588.6	-0.171707	0.000352661	0.00702271
YOR393W	ERR1	15	1080276	1081589	W	phosphopyruvate hydratase ERR1	Putative phosphopyruvate hydratase	50.2758	-0.170797	0.00506897	0.050787
YHR070W	TRM5	8	234881	236380	W	tRNA (guanine) methyltransferase	tRNA(m(1)G37)methyltransferase; methylates a tRNA base adjacent to the anticodon that has a role in prevention of frameshifting; localized to both cytoplasm and mitochondria, and modifies both cytoplasmic and mitochondrial tRNAs; mutations in human ortholog TRMT5 are associated with skeletal muscle respiratory chain deficiencies, and trm5 mutations analogous to disease mutations decrease respirat…	2938.27	-0.169654	9.92537e-07	5.24042e-05
YNL067W	RPL9B	14	499681	500256	W	uS4|uL6|ribosomal 60S subunit protein L9B|L6|rp24|YL11|L9B|L8B	Ribosomal 60S subunit protein L9B; homologous to mammalian ribosomal protein L9 and bacterial L6; RPL9B has a paralog, RPL9A, that arose from a single-locus duplication	15467.3	-0.169365	0.000271791	0.00574864
YEL038W	UTR4	5	80462	81145	W	putative acireductone synthase UTR4	Protein with sequence similarity to acireductone synthases; involved in methionine salvage; found in both the cytoplasm and nucleus	2430.42	-0.16888	4.62768e-05	0.0014962
YDR050C	TPI1	4	555726	556472	C	triose-phosphate isomerase TPI1	Triose phosphate isomerase, abundant glycolytic enzyme; mRNA half-life is regulated by iron availability; transcription is controlled by activators Reb1p, Gcr1p, and Rap1p through binding sites in the 5' non-coding region; inhibition of Tpi1p activity by PEP (phosphoenolpyruvate) stimulates redox metabolism in respiring cells; E104D mutation in human homolog TPI1 causes a rare autosomal disease; …	151967	-0.166568	0.000312283	0.006373
YOR020W-A	YOR020W-A	15	371685	371957	W		Putative protein of unknown function; conserved in A. gossypii; the authentic, non-tagged protein is detected in highly purified mitochondria in high-throughput studies	343.039	-0.166503	0.00391486	0.0420878
YCR075C	ERS1	3	248033	248815	C	cystinosin-like protein ERS1	Protein involved in cystine transport; localizes to the vacuole, plasma membrane and endosome; similarity to human cystinosin, a H(+)-driven transporter involved in L-cystine export from lysosomes and implicated in the disease cystinosis; contains seven transmembrane domains; mutation is functionally complemented by human CTNS	840.33	-0.166375	0.000389698	0.00749872
YDL204W	RTN2	4	94605	95786	W		Reticulon protein; involved in nuclear pore assembly and maintenance of tubular ER morphology; promotes membrane curvature; regulates the ER asymmetry-induced inheritance block during ER stress; role in ER-derived peroxisomal biogenesis; interacts with Sec6p, Yip3p, and Sbh1p; less abundant than RTN1; member of RTNLA (reticulon-like A) subfamily; protein increases in abundance and relocalizes to …	689.349	-0.166151	0.00107892	0.0163831
YNL072W	RNH201	14	490317	491240	W	ribonuclease H2 catalytic subunit RNH201|Rnh2A|RNH35	Ribonuclease H2 catalytic subunit; removes RNA primers during Okazaki fragment synthesis and errant ribonucleotides misincorporated during DNA replication; role in ribonucleotide excision repair; homolog of RNAse HI; related to human AGS4 which causes Aicardi-Goutieres syndrome	591.856	-0.166057	0.00106151	0.0163341
YIL101C	XBP1	9	175307	177250	C		Transcriptional repressor; binds promoter sequences of cyclin genes, CYS3, and SMF2; not expressed during log phase of growth, but induced by stress or starvation during mitosis, and late in meiosis; represses 15% of all yeast genes as cells transition to quiescence; important for maintaining G1 arrest and for longevity of quiescent cells; member of Swi4p/Mbp1p family; phosphorylated by Cdc28p; r…	183.538	-0.165009	0.0112607	0.0907641
YKL056C	TMA19	11	334412	334915	C	MMI1|RBF18	Protein that associates with ribosomes; homolog of translationally controlled tumor protein; green fluorescent protein (GFP)-fusion protein localizes to the cytoplasm and relocates to the mitochondrial outer surface upon oxidative stress	48053	-0.164448	0.000807629	0.013356
YIL124W	AYR1	9	126204	127097	W	GBG1|acylglycerone-phosphate reductase	Bifunctional triacylglycerol lipase and 1-acyl DHAP reductase; NADPH-dependent 1-acyl dihydroxyacetone phosphate reductase involved in phosphatidic acid biosynthesis; lipid droplet triacylglycerol lipase involved in the mobilization of non-polar lipids; found in lipid particles, the endoplasmic reticulum and the mitochondrial outer membrane; required for spore germination; role in cell wall biosy…	3572.48	-0.163048	4.61817e-05	0.0014962
YML024W	RPS17A	13	225889	226697	W	eS17|ribosomal 40S subunit protein S17A|S17e|rp51A|S17A|RPL51A|RP51A	Ribosomal protein 51 (rp51) of the small (40s) subunit; homologous to mammalian ribosomal protein S17, no bacterial homolog; RPS17A has a paralog, RPS17B, that arose from the whole genome duplication	31011.7	-0.162209	0.000688752	0.0118321
YFL017C	GNA1	6	103983	104462	C	glucosamine 6-phosphate N-acetyltransferase|PAT1	Glucosamine-6-phosphate acetyltransferase; evolutionarily conserved; required for multiple cell cycle events including passage through START, DNA synthesis, and mitosis; involved in UDP-N-acetylglucosamine synthesis, forms GlcNAc6P from AcCoA	1602.64	-0.161005	5.76352e-05	0.00181252
YBL039C	URA7	2	143989	145728	C	CTP synthase URA7	Major CTP synthase isozyme (see also URA8); catalyzes the ATP-dependent transfer of the amide nitrogen from glutamine to UTP, forming CTP, the final step in de novo biosynthesis of pyrimidines; involved in phospholipid biosynthesis; capable of forming cytoplasmic filaments termed cytoophidium, especially during conditions of glucose depletion; URA7 has a paralog, URA8, that arose from the whole g…	20032.6	-0.160057	6.12831e-07	3.42412e-05
YIL136W	OM45	9	93619	94800	W		Mitochondrial outer membrane protein of unknown function; major constituent of the outer membrane, extending into the intermembrane space; interacts with porin (Por1p) and with Om14p; imported via the presequence pathway involving the TOM and TIM23 complexes, then assembled in the outer membrane by Mim1p; protein abundance increases in response to DNA replication stress	2253.68	-0.15914	0.00200474	0.0261025
YEL034W	HYP2	5	85676	86149	W	translation elongation factor eIF-5A|eIF-5A|eIF5A|TIF51A	Translation elongation factor eIF-5A; required for translation of proteins containing polyproline stretches, including Bni1p, and this leads to a requirement for mating projection formation; structural homolog of bacterial EF-P; undergoes an essential hypusination modification; HYP2 has a paralog, ANB1, that arose from the whole genome duplication; human EIF5A complements the inviability of the y…	33345.7	-0.158794	0.000509269	0.00930426
YJL003W	COX16	10	432644	433000	W		Mitochondrial inner membrane protein; required for assembly of cytochrome c oxidase	306.768	-0.158703	0.00599638	0.0576113
YNL162W	RPL42A	14	331322	332154	W	eL42|ribosomal 60S subunit protein L42A|L44e|YL27|L42A|L41A	Ribosomal 60S subunit protein L42A; homologous to mammalian ribosomal protein L36A, no bacterial homolog; RPL42A has a paralog, RPL42B, that arose from the whole genome duplication	20238.2	-0.15855	0.00164003	0.0221039
YLR063W	BMT6	12	264157	265254	W	25S rRNA (uracil2843-N3)-methyltransferase	Methyltransferase required for m3U2843 methylation of the 25S rRNA; S-adenosylmethionine-dependent; green fluorescent protein (GFP)-fusion protein localizes to the cytoplasm; YLR063W is not an essential gene	1510.23	-0.157835	2.22009e-05	0.000851777
YOR313C	SPS4	15	901858	902874	C		Protein whose expression is induced during sporulation; not required for sporulation; heterologous expression in E. coli induces the SOS response that senses DNA damage	119.199	-0.157749	0.0151681	0.111627
YOL121C	RPS19A	15	92026	92850	C	eS19|ribosomal 40S subunit protein S19A|S19e|rp55a|YS16A|S19A|S16aA	Protein component of the small (40S) ribosomal subunit; required for assembly and maturation of pre-40 S particles; homologous to mammalian ribosomal protein S19, no bacterial homolog; mutations in human RPS19 are associated with Diamond Blackfan anemia; RPS19A has a paralog, RPS19B, that arose from the whole genome duplication	23964	-0.157638	0.000265759	0.00566461
YOR096W	RPS7A	15	505794	506767	W	eS7|ribosomal 40S subunit protein S7A|S7e|rp30|S7A|RPS30	Protein component of the small (40S) ribosomal subunit; interacts with Kti11p; deletion causes hypersensitivity to zymocin; homologous to mammalian ribosomal protein S7, no bacterial homolog; RPS7A has a paralog, RPS7B, that arose from the whole genome duplication	51566.3	-0.157428	0.000899314	0.0142186
YGL226C-A	OST5	7	72749	73158	C	dolichyl-diphosphooligosaccharide--protein glycotransferase subunit	Zeta subunit of the oligosaccharyltransferase complex of the ER lumen; complex catalyzes asparagine-linked glycosylation of newly synthesized proteins	1264.36	-0.157236	0.00208179	0.0269229
YER088C	DOT6	5	333176	335188	C	PBF2	Protein involved in rRNA and ribosome biogenesis; activated in stochastic pulses of nuclear localization; binds polymerase A and C motif; subunit of the RPD3L histone deacetylase complex; has chromatin specific SANT domain; involved in telomeric gene silencing and filamentation; relative distribution to the nucleus increases upon DNA replication stress	7187.22	-0.156884	4.24793e-05	0.00141311
YMR199W	CLN1	13	662644	664284	W	cyclin CLN1	G1 cyclin involved in regulation of the cell cycle; activates Cdc28p kinase to promote the G1 to S phase transition; late G1 specific expression depends on transcription factor complexes, MBF (Swi6p-Mbp1p) and SBF (Swi6p-Swi4p); CLN1 has a paralog, CLN2, that arose from the whole genome duplication; cell cycle arrest phenotype of the cln1 cln2 cln3 triple null mutant is complemented by any of hum…	3064.98	-0.156861	0.00105048	0.0162513
YPR158C-C	NA	NA	NA	NA	NA	NA	NA	2121.48	-0.156838	0.0160222	0.115985
YHR160C	PEX18	8	419221	420072	C		Peroxin; required for targeting of peroxisomal matrix proteins containing PTS2; interacts with Pex7p; partially redundant with Pex21p; primarily responsible for peroxisomal import during growth on oleate, and expression is induced during oleate growth	31.2118	-0.156828	0.00443506	0.0461551
YBR294W	SUL1	2	789235	791814	W	sulfate permease|SFP2	High affinity sulfate permease of the SulP anion transporter family; sulfate uptake is mediated by specific sulfate transporters Sul1p and Sul2p, which control the concentration of endogenous activated sulfate intermediates	404.672	-0.155829	0.0165033	0.117969
YNR018W	RCF2	14	664270	664944	W	AIM38	Cytochrome c oxidase subunit; has a role in assembly of respiratory supercomplexes; similar to Rcf1p, and either Rcf1p or Rcf2p is required for late-stage assembly of the Cox12p and Cox13p subunits and for cytochrome c oxidase activity; associates with the cytochrome c oxidase - cytochrome bc1 supercomplex; null mutant accumulates reactive oxygen species; member of the conserved hypoxia induced g…	4844.09	-0.155816	4.71234e-07	2.7673e-05
YDL110C	TMA17	4	264512	264964	C	ADC17	ATPase dedicated chaperone that adapts proteasome assembly to stress; Tma17p is induced upon stress; interacts with Rpt6p to assist its pairing to Rpt3p and early steps in proteasome biogenesis; associates with ribosomes; heterozygous deletion demonstrated increases in chromosome instability in a rad9 deletion background; protein abundance is decreased upon intracellular iron depletion	1094.39	-0.155488	0.00151194	0.0208662
YGL047W	ALG13	7	411552	412160	W	N-acetylglucosaminyldiphosphodolichol N-acetylglucosaminyltransferase catalytic subunit ALG13	Catalytic component of UDP-GlcNAc transferase; required for the second step of dolichyl-linked oligosaccharide synthesis; anchored to the ER membrane via interaction with Alg14p; similar to bacterial and human glycosyltransferases; protein abundance increases in response to DNA replication stress; both human homologs ALG13 and ALG14 are required to complement yeast alg13 mutant	623.538	-0.155478	0.00159034	0.021637
YPR138C	MEP3	16	810984	812453	C	ammonium permease MEP3	Ammonium permease of high capacity and low affinity; belongs to a ubiquitous family of cytoplasmic membrane proteins that transport only ammonium (NH4+); expression is under the nitrogen catabolite repression regulation ammonia permease; MEP3 has a paralog, MEP1, that arose from the whole genome duplication	1138.17	-0.155371	0.000844591	0.0137695
YPR043W	RPL43A	16	654166	654847	W	eL43|ribosomal 60S subunit protein L43A|L43e|L43A	Ribosomal 60S subunit protein L43A; null mutation confers a dominant lethal phenotype; homologous to mammalian ribosomal protein L37A, no bacterial homolog; RPL43A has a paralog, RPL43B, that arose from the whole genome duplication	36183.7	-0.155065	4.1118e-05	0.00138383
YMR307W	GAS1	13	887003	888682	W	1,3-beta-glucanosyltransferase GAS1|GGP1|CWH52	Beta-1,3-glucanosyltransferase; required for cell wall assembly and also has a role in transcriptional silencing; localizes to cell surface via a glycosylphosphatidylinositol (GPI) anchor; also found at nuclear periphery; genetic interactions with histone H3 lysine acetyltransferases GCN5 and SAS3 indicate previously unsuspected functions for Gas1 in DNA damage response and cell cycle regulation	86178.3	-0.154645	4.43054e-11	6.53789e-09
YLR109W	AHP1	12	368781	369311	W	thioredoxin peroxidase AHP1|cTPxIII	Thiol-specific peroxiredoxin; reduces hydroperoxides to protect against oxidative damage; function in vivo requires covalent conjugation to Urm1p	47353.2	-0.154535	1.01976e-07	7.07073e-06
YFL030W	AGX1	6	76831	77988	W	alanine--glyoxylate transaminase	Alanine:glyoxylate aminotransferase (AGT); catalyzes the synthesis of glycine from glyoxylate, which is one of three pathways for glycine biosynthesis in yeast; similar to mammalian and plant alanine:glyoxylate aminotransferases; human homolog AGXT complements yeast null mutant	314.18	-0.154205	0.00944305	0.0803916
YOR060C	SLD7	15	440390	441163	C	YOR29-11	Protein with a role in chromosomal DNA replication; interacts with Sld3p and reduces its affinity for Cdc45p; deletion mutant has aberrant mitochondria	603.536	-0.153547	0.00128566	0.0186843
YHR032W	ERC1	8	173344	175089	W		Member of the multi-drug and toxin extrusion (MATE) family; the MATE family is part of the multidrug/oligosaccharidyl-lipid/polysaccharide (MOP) exporter superfamily; overproduction confers ethionine resistance and accumulation of S-adenosylmethionine	5421.17	-0.153472	7.94522e-08	5.78794e-06
YKL093W	MBR1	11	264789	265808	W		Protein involved in mitochondrial functions and stress response; overexpression suppresses growth defects of hap2, hap3, and hap4 mutants; MBR1 has a paralog, ISF1, that arose from the whole genome duplication	138.657	-0.153065	0.0185841	0.126679
YCR020C-A	MAK31	3	154830	155096	C	NAA38|SMX1|LSM9	Non-catalytic subunit of N-terminal acetyltransferase of the NatC type; required for replication of dsRNA virus; member of the Sm protein family	366.384	-0.152899	0.0108441	0.0881468
YGR230W	BNS1	7	951894	952307	W		Protein of unknown function; overexpression bypasses need for Spo12p, but not required for meiosis; BNS1 has a paralog, SPO12, that arose from the whole genome duplication	267.334	-0.152604	0.0088145	0.0762819
YJR145C	RPS4A	10	702027	703068	C	eS4|ribosomal 40S subunit protein S4A|S4e|rp5|YS6|S7A|S4A	Protein component of the small (40S) ribosomal subunit; mutation affects 20S pre-rRNA processing; homologous to mammalian ribosomal protein S4, no bacterial homolog; RPS4A has a paralog, RPS4B, that arose from the whole genome duplication	86529.1	-0.15198	0.000189363	0.0044481
YER074W	RPS24A	5	306323	307196	W	eS24|ribosomal 40S subunit protein S24A|S24e|S24A|RPS24EA	Protein component of the small (40S) ribosomal subunit; homologous to mammalian ribosomal protein S24, no bacterial homolog; RPS24A has a paralog, RPS24B, that arose from the whole genome duplication	43648.1	-0.151924	0.00107539	0.0163831
YMR011W	HXT2	13	288079	289704	W	hexose transporter HXT2	High-affinity glucose transporter of the major facilitator superfamily; expression is induced by low levels of glucose and repressed by high levels of glucose	7121.18	-0.151863	0.0196717	0.131328
YMR055C	BUB2	13	386101	387021	C	PAC7	Mitotic exit network regulator; forms GTPase-activating Bfa1p-Bub2p complex that binds Tem1p and spindle pole bodies, blocks cell cycle progression before anaphase in response to spindle and kinetochore damage	511.926	-0.151863	0.00425943	0.0451437
YJL199C	MBB1	10	59856	60182	C		Putative protein of unknown function; conserved among S. cerevisiae strains, not conserved in closely related Saccharomyces species; protein detected in large-scale protein-protein interaction studies; YJL199C is not an essential gene	117.075	-0.151833	0.019019	0.128317
YGR027C	RPS25A	7	534132	534458	C	eS25|ribosomal 40S subunit protein S25A|S25e|rp45|YS23|S31A|S25A|RPS31A	Protein component of the small (40S) ribosomal subunit; homologous to mammalian ribosomal protein S25, no bacterial homolog; RPS25A has a paralog, RPS25B, that arose from the whole genome duplication	33204.2	-0.151346	6.18755e-05	0.00193529
YNL092W	YNL092W	14	450871	452073	W	S-adenosylmethionine-dependent methyltransferase	S-adenosylmethionine-dependent protein methyltransferase; capable of automethylation; member of the seven beta-strand family; YNL092W is not an essential gene	180.708	-0.151204	0.0176046	0.122313
YDL160C-A	MHF2	4	169366	169608	C		Component of the heterotetrameric MHF histone-fold complex; in humans the MHF complex interacts with both DNA and Mph1p ortholog FANCM to stabilize and remodel blocked replication forks and repair damaged DNA; mhf2 srs2 double mutants are MMS hypersensitive; orthologous to human centromere constitutive-associated network (CCAN) subunit CENP-X, also known as MHF2	154.948	-0.149518	0.0216385	0.139764
YDR155C	CPR1	4	768512	769000	C	peptidylprolyl isomerase CPR1|CPH1|CYP1	Cytoplasmic peptidyl-prolyl cis-trans isomerase (cyclophilin); catalyzes the cis-trans isomerization of peptide bonds N-terminal to proline residues; binds the drug cyclosporin A; N-terminally propionylated in vivo; protein abundance increases in response to DNA replication stress	41367.8	-0.149448	0.000485925	0.00905016
YJR009C	TDH2	10	453683	454681	C	glyceraldehyde-3-phosphate dehydrogenase (phosphorylating) TDH2|GAPDH|GLD2	Glyceraldehyde-3-phosphate dehydrogenase (GAPDH), isozyme 2; involved in glycolysis and gluconeogenesis; tetramer that catalyzes reaction of glyceraldehyde-3-phosphate to 1,3 bis-phosphoglycerate; detected in cytoplasm and cell wall; protein abundance increases in response to DNA replication stress; GAPDH-derived antimicrobial peptides are active against a wide variety of wine-related yeasts and …	106135	-0.149392	7.41912e-05	0.00220088
YMR196W	YMR196W	13	655076	658342	W		Putative protein of unknown function; green fluorescent protein (GFP)-fusion protein localizes to the cytoplasm; YMR196W is not an essential gene	2496.12	-0.148924	0.00707434	0.0650933
YHL001W	RPL14B	8	104277	105091	W	eL14|ribosomal 60S subunit protein L14B|L14e|L14B	Ribosomal 60S subunit protein L14B; homologous to mammalian ribosomal protein L14, no bacterial homolog; RPL14B has a paralog, RPL14A, that arose from the whole genome duplication; protein abundance increases in response to DNA replication stress	15776.6	-0.148615	0.000775559	0.0129372
YNL046W	YNL046W	14	542304	542822	W		Putative protein of unknown function; expression depends on Swi5p; GFP-fusion protein localizes to the endoplasmic reticulum; deletion confers sensitivity to 4-(N-(S-glutathionylacetyl)amino) phenylarsenoxide (GSAO)	1157.36	-0.148427	0.000832889	0.013656
YOL147C	PEX11	15	47933	48643	C	PMP27|PMP24	Peroxisomal protein required for medium-chain fatty acid oxidation; also required for peroxisome proliferation, possibly by inducing membrane curvature; localization regulated by phosphorylation; transcription regulated by Adr1p and Pip2p-Oaf1p	893.43	-0.148164	0.00541451	0.0531749
YML056C	IMD4	13	162194	164176	C	IMP dehydrogenase IMD4	Inosine monophosphate dehydrogenase; catalyzes the rate-limiting step in the de novo synthesis of GTP; member of a four-gene family in S. cerevisiae, constitutively expressed; IMD4 has a paralog, IMD3, that arose from the whole genome duplication	34416.8	-0.146892	0.000100631	0.00269364
YOR317W	FAA1	15	909343	911445	W	long-chain fatty acid-CoA ligase FAA1	Long chain fatty acyl-CoA synthetase; activates fatty acids with a preference for C12:0-C16:0 chain lengths; role in the competitive import of long-chain fatty acids and sphingoid long-chain bases; accounts for most acyl-CoA synthetase activity; localizes to lipid particles and the plasma membrane; role in sphingolipid-to-glycerolipid metabolism; forms ER foci upon replication stress; faa1 faa4 d…	11502.4	-0.146716	0.000716963	0.0121356
YBR189W	RPS9B	2	604508	605508	W	ribosomal 40S subunit protein S9B|rp21|YS11|S9B|S4|S13|SUP46|RPS13A	Protein component of the small (40S) ribosomal subunit; homologous to mammalian ribosomal protein S9 and bacterial S4; RPS9B has a paralog, RPS9A, that arose from the whole genome duplication	77727.6	-0.146627	0.00155822	0.0212502
YOR185C	GSP2	15	681444	682106	C	Ran GTPase GSP2|CNR2	GTP binding protein (mammalian Ranp homolog); involved in the maintenance of nuclear organization, RNA processing and transport; interacts with Kap121p, Kap123p and Pdr6p (karyophilin betas); not required for viability; protein abundance increases in response to DNA replication stress; GSP2 has a paralog, GSP1, that arose from the whole genome duplication	1704.15	-0.14568	0.00213681	0.0273274
YKR042W	UTH1	11	519527	520624	W	SUN family protein UTH1	Mitochondrial inner membrane protein; role in mitophagy is disputed; implicated in cell wall biogenesis, the oxidative stress response, life span during starvation, and cell death; SUN family member; UTH1 has a paralog, NCA3, that arose from the whole genome duplication	36296.8	-0.145302	2.24106e-05	0.000854126
YGR189C	CRH1	7	876669	878192	C	transglycosylase	Chitin transglycosylase; functions in the transfer of chitin to beta(1-6) and beta(1-3) glucans in the cell wall; similar and functionally redundant to Utr2; localizes to sites of polarized growth; expression induced by cell wall stress	14192.9	-0.145153	0.000628671	0.0111323
YBR010W	HHT1	2	256331	256741	W	histone H3|SIN2|BUR5	Histone H3; core histone protein required for chromatin assembly, part of heterochromatin-mediated telomeric and HM silencing; one of two identical histone H3 proteins (see HHT2); regulated by acetylation, methylation, and phosphorylation; H3K14 acetylation plays an important role in the unfolding of strongly positioned nucleosomes during repair of UV damage	12280.9	-0.14504	0.00108968	0.0164596
YCL033C	MXR2	3	62776	63282	C	MSRB	Methionine-R-sulfoxide reductase; involved in the response to oxidative stress; protects iron-sulfur clusters from oxidative inactivation along with MXR1; involved in the regulation of lifespan	1145.03	-0.144997	0.00282998	0.0335114
YOR350C	MNE1	15	992864	994855	C		Protein involved in splicing Group I aI5-beta intron from COX1 mRNA; mitochondrial matrix protein	1507.71	-0.144878	0.000920493	0.0145135
YER145C	FTR1	5	460526	461740	C	high-affinity iron permease FTR1	High affinity iron permease; involved in the transport of iron across the plasma membrane; forms complex with Fet3p; expression is regulated by iron; protein abundance increases in response to DNA replication stress	8731.13	-0.144814	0.00153061	0.0209693
YLR038C	COX12	12	224921	225172	C	cytochrome c oxidase subunit VIb	Subunit VIb of cytochrome c oxidase; cytochrome c oxidase is also known as respiratory Complex IV and is the terminal member of the mitochondrial inner membrane electron transport chain; required for assembly of cytochrome c oxidase but not required for activity after assembly; phosphorylated; easily released from the intermembrane space, suggesting a loose association with Complex IV	744.707	-0.144777	0.0157445	0.114551
YEL026W	SNU13	5	101943	102323	W	RNA binding protein SNU13	RNA binding protein; part of U3 snoRNP involved in rRNA processing, part of U4/U6-U5 tri-snRNP involved in mRNA splicing, similar to human 15.5K protein	8431.85	-0.144736	0.000168141	0.00404876
YBR187W	GDT1	2	602634	603476	W	putative ribosome biosynthesis protein GDT1	Calcium transporter localized to the cis- and medial-Golgi apparatus; required for protein glycosylation; GFP-fusion protein localizes to the vacuole; TMEM165, a human gene which causes Congenital Disorders of Glycosylation is orthologous and functionally complements the null allele; expression pattern and physical interactions suggest a possible role in ribosome biogenesis; expression reduced in…	8399.63	-0.14435	1.31802e-05	0.000534168
YGR063C	SPT4	7	617516	617824	C	transcription elongation factor SPT4	Spt4p/5p (DSIF) transcription elongation factor complex subunit; the Spt4/5 complex binds to ssRNA in a sequence-specific manner, and along with RNAP I and II has multiple roles regulating transcriptional elongation, RNA processing, quality control, and transcription-coupled repair; localizes to kinetochores and heterochromatin, influencing chromosomal dynamics and silencing; required for transcr…	1023.23	-0.144221	0.00539233	0.0530477
YGL035C	MIG1	7	431548	433062	C	transcription factor MIG1|TDS22|SSN1|CAT4	Transcription factor involved in glucose repression; sequence specific DNA binding protein containing two Cys2His2 zinc finger motifs; regulated by the SNF1 kinase and the GLC7 phosphatase; regulates filamentous growth along with Mig2p in response to glucose depletion; activated in stochastic pulses of nuclear localization, shuttling between cytosol and nucleus depending on external glucose level…	3115.85	-0.143833	0.000227861	0.00511421
YLR061W	RPL22A	12	263194	263948	W	eL22|ribosomal 60S subunit protein L22A|L22e|rp4|l1c|YL31|L22A	Ribosomal 60S subunit protein L22A; required for translation of long 5' UTR of IME1 mRNA and meiotic entry; required for the oxidative stress response, pseudohyphal and invasive growth; homologous to mammalian ribosomal protein L22, no bacterial homolog; RPL22A has a paralog, RPL22B, that arose from the whole genome duplication	28527	-0.143174	0.000600306	0.0107291
YKL006W	RPL14A	11	431906	432720	W	eL14|ribosomal 60S subunit protein L14A|L14e|L14A	Ribosomal 60S subunit protein L14A; N-terminally acetylated; homologous to mammalian ribosomal protein L14, no bacterial homolog; RPL14A has a paralog, RPL14B, that arose from the whole genome duplication	41095.8	-0.142867	0.000673286	0.011671
YMR278W	PRM15	13	822763	824631	W	PGM3|phosphoribomutase PRM15	Phosphoribomutase; catalyzes interconversion of ribose-1-phosphate and ribose-5-phosphate; has some phosphoglucomutase activity but primary activity in vivo is phosphoribomutase; contributes to ribose recycling in the pentose phosphate pathway; transcription induced in response to stress; green fluorescent protein (GFP)-fusion protein localizes to the cytoplasm and nucleus; non-essential	2385.48	-0.142619	7.13079e-05	0.00214857
YMR122W-A	YMR122W-A	13	511315	511569	W		Protein of unknown function; green fluorescent protein (GFP)-fusion protein localizes to the cytoplasm and endoplasmic reticulum	6890.55	-0.14225	0.00718872	0.0658775
YHR033W	YHR033W	8	175548	176819	W	putative glutamate 5-kinase	Putative protein of unknown function; epitope-tagged protein localizes to the cytoplasm; YHR033W has a paralog, PRO1, that arose from the whole genome duplication	516.819	-0.142074	0.00444864	0.0462129
YBR296C	PHO89	2	796798	798522	C	ITN1	Plasma membrane Na+/Pi cotransporter; active in early growth phase; similar to phosphate transporters of Neurospora crassa; transcription regulated by inorganic phosphate concentrations and Pho4p; mutations in related human transporter genes hPit1 and hPit2 are associated with hyperphosphatemia-induced calcification of vascular tissue and familial idiopathic basal ganglia calcification	38.3022	-0.14206	0.013312	0.10242
YNR041C	COQ2	14	700541	701659	C	4-hydroxybenzoate octaprenyltransferase	Para hydroxybenzoate polyprenyl transferase; catalyzes the second step in ubiquinone (coenzyme Q) biosynthesis; human COQ2, mutations in which are implicated in an increased risk of mutiple-system atrophy, can complement a yeast coq2 null mutant	1304.78	-0.142012	0.000869308	0.0139563
YNL178W	RPS3	14	302680	303402	W	uS3|ribosomal 40S subunit protein S3|rp13|YS3|S3|SUF14	Protein component of the small (40S) ribosomal subunit; has apurinic/apyrimidinic (AP) endonuclease activity; essential for viability; nascent Rps3p is bound by specific chaperone Yar1p during translation; homologous to mammalian ribosomal protein S3 and bacterial S3	101996	-0.141978	0.00191037	0.0251583
YBR067C	TIP1	2	372103	372735	C	putative lipase	Major cell wall mannoprotein with possible lipase activity; transcription is induced by heat- and cold-shock; member of the Srp1p/Tip1p family of serine-alanine-rich proteins	6174.86	-0.14168	0.00177386	0.0236309
YDR377W	ATP17	4	1228611	1228916	W	F1F0 ATP synthase subunit f	Subunit f of the F0 sector of mitochondrial F1F0 ATP synthase; F1F0 ATP synthase is a large, evolutionarily conserved enzyme complex required for ATP synthesis	1062.32	-0.140728	0.0107739	0.0877902
YJL196C	ELO1	10	67850	68782	C	fatty acid elongase ELO1	Elongase I, medium-chain acyl elongase; catalyzes carboxy-terminal elongation of unsaturated C12-C16 fatty acyl-CoAs to C16-C18 fatty acids; ELO1 has a paralog, ELO2, that arose from the whole genome duplication	7785.26	-0.140637	0.000512044	0.00932536
YMR182C	RGM1	13	624532	625167	C		Putative zinc finger DNA binding transcription factor; contains two N-terminal C2H2 zinc fingers and C-terminal proline rich domain; overproduction impairs cell growth and induces expression of genes involved in monosaccharide catabolism and aldehyde metabolism; regulates expression of of Y' telomeric elements and subtelomeric COS genes; relocalizes to the cytosol in response to hypoxia; RGM1 has…	148.016	-0.140282	0.031203	0.173003
YLR245C	CDD1	12	626502	626930	C	cytidine deaminase	Cytidine deaminase; catalyzes the modification of cytidine to uridine in vitro but native RNA substrates have not been identified, localizes to both the nucleus and cytoplasm	294.91	-0.140034	0.013523	0.103198
YER110C	KAP123	5	378762	382103	C	YRB4	Karyopherin beta; mediates nuclear import of ribosomal proteins prior to assembly into ribosomes and import of histones H3 and H4; localizes to the nuclear pore, nucleus, and cytoplasm; exhibits genetic interactions with RAI1	19124.2	-0.140017	8.09836e-05	0.00229726
YHR049W	FSH1	8	206462	207193	W	putative serine hydrolase	Putative serine hydrolase; localizes to both the nucleus and cytoplasm; sequence is similar to S. cerevisiae Fsh2p and Fsh3p and the human candidate tumor suppressor OVCA2	5464.73	-0.139587	0.00108566	0.016442
YPL246C	RBD2	16	84509	85297	C	putative rhomboid protease RBD2	Possible rhomboid protease; has similarity to eukaryotic rhomboid proteases including Pcp1p	3614.35	-0.13936	0.000286135	0.00596633
YHR105W	YPT35	8	324766	325410	W		Endosomal protein of unknown function; contains a phox (PX) homology domain; binds to both phosphatidylinositol-3-phosphate (PtdIns(3)P) and proteins involved in ER-Golgi or vesicular transport	188.068	-0.138665	0.0262281	0.156094
YGR279C	SCW4	7	1048798	1049958	C	putative family 17 glucosidase	Cell wall protein with similarity to glucanases; scw4 scw10 double mutants exhibit defects in mating; SCW4 has a paralog, SCW10, that arose from the whole genome duplication	16194.4	-0.138602	0.000558609	0.0101094
YMR251W-A	HOR7	13	774752	774931	W		Protein of unknown function; overexpression suppresses Ca2+ sensitivity of mutants lacking inositol phosphorylceramide mannosyltransferases Csg1p and Csh1p; transcription is induced under hyperosmotic stress and repressed by alpha factor; HOR7 has a paralog, DDR2, that arose from the whole genome duplication	1986.63	-0.138221	0.00626712	0.0594189
YDR032C	PST2	4	504099	504695	C	flavodoxin-like fold family protein	Protein with similarity to a family of flavodoxin-like proteins; induced by oxidative stress in a Yap1p dependent manner; the authentic, non-tagged protein is detected in highly purified mitochondria in high-throughput studies; protein abundance increases in response to DNA replication stress; PST2 has a paralog, RFS1, that arose from the whole genome duplication	6247.34	-0.137927	0.000643552	0.0112916
YML121W	GTR1	13	26930	27862	W	Rag GTPase GTR1	Subunit of a TORC1-stimulating GTPase complex; subunit of the heterodimeric Gtr1-Gtr2 GTPase complex that stimulates TORC1 in response to amino acid stimulation; tethered to the vacuolar membrane as part of the EGOC, a complex required for sorting of Gap1p and microautophagy; involved in phosphate transport and telomeric chromatin silencing; activated by the the Iml1p (GAP) subunit of the SEACIT …	2421.2	-0.137827	2.8761e-05	0.00102173
YAL003W	EFB1	1	142174	143160	W	translation elongation factor 1 subunit beta|EF-1beta|eEF1Balpha|TEF5	Translation elongation factor 1 beta; stimulates nucleotide exchange to regenerate EF-1 alpha-GTP for the next elongation cycle; part of the EF-1 complex, which facilitates binding of aminoacyl-tRNA to the ribosomal A site; human homolog EEF1B2 can complement yeast efb1 mutants	68150.7	-0.137676	0.000236856	0.00516328
YGR086C	PIL1	7	649598	650617	C	lipid-binding protein PIL1	Eisosome core component; eisosomes are large immobile cell cortex structures associated with endocytosis; detected in phosphorylated state in mitochondria; phosphorylated on Thr233 upon Pkc1p hyperactivation in a Slt2p MAPK-dependent fashion; null mutant shows activation of Pkc1p/Ypk1p stress resistance pathways; member of BAR domain family; protein increases in abundance and relocalizes from pla…	21431	-0.137582	0.000358992	0.00709966
YOL086C	ADH1	15	159548	160594	C	alcohol dehydrogenase ADH1|ADC1	Alcohol dehydrogenase; fermentative isozyme active as homo- or heterotetramers; required for the reduction of acetaldehyde to ethanol, the last step in the glycolytic pathway; ADH1 has a paralog, ADH5, that arose from the whole genome duplication	352562	-0.1375	6.7692e-05	0.00207217
YDR045C	RPC11	4	547978	548310	C	DNA-directed RNA polymerase III core subunit RPC11|C11	RNA polymerase III subunit C11; mediates pol III RNA cleavage activity and is important for termination of transcription; homologous to TFIIS	811.738	-0.137319	0.00628622	0.059502
YPL090C	RPS6A	16	377291	378395	C	eS6|ribosomal 40S subunit protein S6A|S6e|rp9|YS4|S6A|S10A	Protein component of the small (40S) ribosomal subunit; homologous to mammalian ribosomal protein S6, no bacterial homolog; phosphorylated on S233 by Ypk3p in a TORC1-dependent manner, and on S232 in a TORC1/2-dependent manner by Ypk1/2/3p; RPS6A has a paralog, RPS6B, that arose from the whole genome duplication	83399.9	-0.136582	0.00324085	0.0368599
YNL261W	ORC5	14	155100	156539	W	origin recognition complex subunit 5	Subunit of the origin recognition complex (ORC); ORC directs DNA replication by binding to replication origins and is also involved in transcriptional silencing	2262.93	-0.136416	7.6131e-05	0.00222525
YDR382W	RPP2B	4	1239492	1239824	W	ribosomal protein P2B|YP2beta|P2B|L45|YPA1|RPL45	Ribosomal protein P2 beta; a component of the ribosomal stalk, which is involved in the interaction between translational elongation factors and the ribosome; free (non-ribosomal) P2 stimulates the phosphorylation of the eIF2 alpha subunit (Sui2p) by Gcn2p; regulates the accumulation of P1 (Rpp1Ap and Rpp1Bp) in the cytoplasm	31362.7	-0.136185	0.00149074	0.0207227
YGR159C	NSR1	7	806412	807656	C	SHE5	Nucleolar protein that binds nuclear localization sequences; required for pre-rRNA processing and ribosome biogenesis; binds to single stranded telomeric DNA and mRNA; methylated by Hmt1p; interaction with Top1p and nucleolar localization are negatively regulated by polyphosphorylation	42817	-0.135982	0.00116222	0.0172387
YKL152C	GPM1	11	163642	164385	C	phosphoglycerate mutase GPM1	Tetrameric phosphoglycerate mutase; mediates the conversion of 3-phosphoglycerate to 2-phosphoglycerate during glycolysis and the reverse reaction during gluconeogenesis	196395	-0.13587	0.000102671	0.00273195
YMR116C	ASC1	13	499456	500688	C	RACK1|guanine nucleotide-binding protein subunit beta|ASU9|NAD1|CPC2	G-protein beta subunit and guanine dissociation inhibitor for Gpa2p; ortholog of RACK1 that inhibits translation; core component of the small (40S) ribosomal subunit; required to prevent frameshifting at ribosomes stalled at repeated CGA codons; regulates P-body formation induced by replication stress; represses Gcn4p in the absence of amino acid starvation	139529	-0.135846	0.00118823	0.0174892
YJR073C	OPI3	10	572315	572935	C	bifunctional phosphatidyl-N-methylethanolamine N-methyltransferase/phosphatidyl-N-dimethylethanolamine N-methyltransferase|PEM2	Methylene-fatty-acyl-phospholipid synthase; catalyzes the last two steps in phosphatidylcholine biosynthesis; also known as phospholipid methyltransferase	12564.6	-0.135811	0.00148204	0.0207018
YNL162W-A	YNL162W-A	14	330329	330547	W		Putative protein of unknown function; identified by homology	158.356	-0.135384	0.0365456	0.192601
YLR237W	THI7	12	612367	614163	W	thiamine transporter THI7|THI10	Plasma membrane transporter responsible for the uptake of thiamine; contributes to uptake of 5-aminoimidazole-4-carboxamide-1-beta-D-ribofuranoside (acadesine); member of the major facilitator superfamily of transporters; mutation of human ortholog causes thiamine-responsive megaloblastic anemia	1921.5	-0.135383	0.000219458	0.00495286
YDR538W	PAD1	4	1510902	1511630	W	phenylacrylic acid decarboxylase PAD1|POF1	Phenylacrylic acid decarboxylase; confers resistance to cinnamic acid, decarboxylates aromatic carboxylic acids to the corresponding vinyl derivatives; also has mRNA binding activity; homolog of E. coli UbiX; co-overproduction of Pad1p and Fdc1p greatly increases cinnamic acid decarboxylase activity	797.567	-0.13538	0.00220358	0.0281188
YER152C	YER152C	5	472657	473988	C	2-aminoadipate transaminase	Protein with 2-aminoadipate transaminase activity; shares amino acid similarity with the aminotransferases Aro8p and Aro9p; YER152C is not an essential gene	3800.62	-0.135138	1.39734e-05	0.000562357
YMR170C	ALD2	13	601562	603082	C	aldehyde dehydrogenase (NAD(+)) ALD2	Cytoplasmic aldehyde dehydrogenase; involved in ethanol oxidation and beta-alanine biosynthesis; uses NAD+ as the preferred coenzyme; expression is stress induced and glucose repressed; very similar to Ald3p	1363.42	-0.135133	0.000190825	0.00446422
YGL147C	RPL9A	7	227754	228329	C	uL6|ribosomal 60S subunit protein L9A|L6|rp24|YL11|L9A|L8A	Ribosomal 60S subunit protein L9A; homologous to mammalian ribosomal protein L9 and bacterial L6; RPL9A has a paralog, RPL9B, that arose from a single-locus duplication	59728.7	-0.134931	0.00573161	0.0553446
YBL042C	FUI1	2	138341	140260	C	uridine permease	High affinity uridine permease, localizes to the plasma membrane; also mediates low but significant transport of the cytotoxic nucleoside analog 5-fluorouridine; not involved in uracil transport; relative distribution to the vacuole increases upon DNA replication stress	6840.76	-0.134862	0.0029751	0.0348002
YJL025W	RRN7	10	393967	395511	W		Component of the core factor (CF) rDNA transcription factor complex; CF is required for transcription of 35S rRNA genes by RNA polymerase I and is composed of Rrn6p, Rrn7p, and Rrn11p	1662.68	-0.134337	0.0019332	0.025343
YHR113W	APE4	8	336337	337809	W	aspartyl aminopeptidase	Cytoplasmic aspartyl aminopeptidase with possible vacuole function; Cvt pathway cargo protein; cleaves unblocked N-terminal acidic amino acids from peptide substrates; forms a 12-subunit homo-oligomer; M18 metalloprotease family	3549.76	-0.134208	0.000499874	0.00919098
YER156C	YER156C	5	483325	484341	C		Putative protein of unknown function; interacts with Hsp82p and copurifies with Ipl1p; expression is copper responsive and downregulated in strains deleted for MAC1, a copper-responsive transcription factor; similarity to mammalian MYG1	5988.64	-0.134162	0.000245074	0.00532227
YGR109C	CLB6	7	705359	706501	C	B-type cyclin CLB6	B-type cyclin involved in DNA replication during S phase; activates Cdc28p to promote initiation of DNA synthesis; functions in formation of mitotic spindles along with Clb3p and Clb4p; most abundant during late G1; CLB6 has a paralog, CLB5, that arose from the whole genome duplication	480.89	-0.134111	0.0172066	0.120882
YPL149W	ATG5	16	271310	272194	W	APG5	Conserved protein involved in autophagy and the Cvt pathway; undergoes conjugation with Atg12p to form a complex involved in Atg8p lipidation; Atg5p-Atg12p conjugate enhances E2 activity of Atg3 by rearranging its catalytic site, also forms a complex with Atg16p; the Atg5-Atg12/Atg16 complex binds to membranes and is essential for autophagosome formation; also involved in methionine restriction e…	1262.18	-0.134019	0.00123269	0.0180054
YIL018W	RPL2B	9	316768	317932	W	uL2|ribosomal 60S subunit protein L2B|L2|rp8|YL6|L5B|L2B|LOT2|RPL5A	Ribosomal 60S subunit protein L2B; homologous to mammalian ribosomal protein L2 and bacterial L2; RPL2B has a paralog, RPL2A, that arose from the whole genome duplication; expression is upregulated at low temperatures	102272	-0.133935	0.0030732	0.0354435
YCL021W-A	YCL021W-A	3	83620	83997	W		Putative protein of unknown function; SWAT-GFP and mCherry fusion proteins localize to the vacuole	240.321	-0.133917	0.0250244	0.153863
YDR225W	HTA1	4	915530	915928	W	histone H2A|SPT11|H2A1	Histone H2A; core histone protein required for chromatin assembly and chromosome function; one of two nearly identical subtypes (see also HTA2); DNA damage-dependent phosphorylation by Mec1p facilitates DNA repair; acetylated by Nat4p; N-terminally propionylated in vivo	15612.6	-0.13374	0.000297428	0.00614673
YBL030C	PET9	2	163041	163997	C	ADP/ATP carrier protein PET9|OP1|ANC2|AAC2	Major ADP/ATP carrier of the mitochondrial inner membrane; exchanges cytosolic ADP for mitochondrially synthesized ATP; also imports heme and ATP; required for viability in many lab strains that carry a sal1 mutation; PET9 has a paralog, AAC3, that arose from the whole genome duplication; human homolog SLC25A4 implicated in progressive external ophthalmoplegia can complement yeast null mutant	12873.1	-0.133212	0.00111839	0.0167178
YJR135W-A	TIM8	10	676971	677234	W	protein transporter TIM8	Mitochondrial intermembrane space protein; forms a complex with Tim13p that delivers a subset of hydrophobic proteins to the TIM22 complex for inner membrane insertion; homolog of human TIMM8A, implicated in Mohr-Tranebjaerg syndrome, also known as deafness-dystonia-optic neuronopathy (DDON) syndrome; human TIMM8A can complement yeast null mutant	704.405	-0.133064	0.0159026	0.115409
YDL083C	RPS16B	4	306926	307789	C	uS9|ribosomal 40S subunit protein S16B|S9|rp61R|S16B	Protein component of the small (40S) ribosomal subunit; homologous to mammalian ribosomal protein S16 and bacterial S9; RPS16B has a paralog, RPS16A, that arose from the whole genome duplication	43264.5	-0.132943	0.0047687	0.0485733
YPL220W	RPL1A	16	135790	136443	W	uL1|PUB2|ribosomal 60S subunit protein L1A|L1|L1A|SSM1	Ribosomal 60S subunit protein L1A; N-terminally acetylated; homologous to mammalian ribosomal protein L10A and bacterial L1; RPL1A has a paralog, RPL1B, that arose from the whole genome duplication; rpl1a rpl1b double null mutation is lethal	41977.3	-0.132843	0.00326938	0.0369652
YKL035W	UGP1	11	369891	371390	W	UTP glucose-1-phosphate uridylyltransferase	UDP-glucose pyrophosphorylase (UGPase); catalyses the reversible formation of UDP-Glc from glucose 1-phosphate and UTP, involved in a wide variety of metabolic pathways, expression modulated by Pho85p through Pho4p; involved in PKA-mediated oxidative stress resistance and long-term survival in stationary phase; UGP1 has a paralog, YHL012W, that arose from the whole genome duplication	13234.2	-0.132564	0.00950969	0.0808394
YOL120C	RPL18A	15	93395	94402	C	eL18|ribosomal 60S subunit protein L18A|L18e|rp28A|L18A|RP28A	Ribosomal 60S subunit protein L18A; intron of RPL18A pre-mRNA forms stem-loop structures that are a target for Rnt1p cleavage leading to degradation; homologous to mammalian ribosomal protein L18, no bacterial homolog; RPL18A has a paralog, RPL18B, that arose from the whole genome duplication	61575	-0.131755	0.000881189	0.0140089
YPR170W-B	YPR170W-B	16	883239	883595	W		Putative protein of unknown function; conserved in fungi; SWAT-GFP fusion protein localizes to the vacuole membrane; partially overlaps the dubious genes YPR169W-A, YPR170W-A and YRP170C	2939.96	-0.1315	0.00437568	0.0459287
YHL040C	ARN1	8	19088	20971	C	siderophore transporter	ARN family transporter for siderophore-iron chelates; responsible for uptake of iron bound to ferrirubin, ferrirhodin, and related siderophores; protein increases in abundance and relocalizes to the vacuole upon DNA replication stress	1391.77	-0.1315	0.00368653	0.0405659
YGL010W	MPO1	7	475545	476069	W		Protein involved in metabolism of phytosphingosine; not an essential gene	130.387	-0.130848	0.0418673	0.209337
YDL200C	MGT1	4	100501	101067	C	methylated-DNA--protein-cysteine methyltransferase|MGMT	DNA repair methyltransferase (6-O-methylguanine-DNA methylase); involved in protection against DNA alkylation damage	632.701	-0.130339	0.007666	0.0682938
YGL126W	SCS3	7	270997	272139	W	FIT2B	Protein required for inositol prototrophy; required for normal ER membrane biosynthesis; ortholog of the FIT family of proteins involved in triglyceride droplet biosynthesis and homologous to human FIT2; disputed role in the synthesis of inositol phospholipids from inositol	2447.73	-0.130127	7.20011e-05	0.00215613
YOL127W	RPL25	15	80348	81190	W	uL23|ribosomal 60S subunit protein L25|L23|rpl6L|YL25|L25	Ribosomal 60S subunit protein L25; primary rRNA-binding ribosomal protein component of large ribosomal subunit; binds to 25S rRNA via a conserved C-terminal motif; homologous to mammalian ribosomal protein L23A and bacterial L23	65915.9	-0.129989	0.00611637	0.0584713
YOR103C	OST2	15	516449	516841	C	dolichyl-diphosphooligosaccharide-protein glycotransferase	Epsilon subunit of the oligosaccharyltransferase complex; located in the ER lumen; catalyzes asparagine-linked glycosylation of newly synthesized proteins	1570.08	-0.129569	0.000819407	0.013512
YOR063W	RPL3	15	444686	445849	W	uL3|ribosomal 60S subunit protein L3|rp1|YL1|L3|YOR29-14|TCM1|MAK8	Ribosomal 60S subunit protein L3; homologous to mammalian ribosomal protein L3 and bacterial L3; plays an important role in function of eIF5B in stimulating 3' end processing of 18S rRNA in context of 80S ribosomes that have not yet engaged in translation; involved in replication and maintenance of killer double stranded RNA virus	186206	-0.129478	0.000165232	0.00403392
YOL039W	RPP2A	15	254297	254617	W	P2A|ribosomal protein P2A|RPLA2|RPL44	Ribosomal protein P2 alpha; a component of the ribosomal stalk, which is involved in the interaction between translational elongation factors and the ribosome; free (non-ribosomal) P2 stimulates the phosphorylation of the eIF2 alpha subunit (Sui2p) by Gcn2p; regulates the accumulation of P1 (Rpp1Ap and Rpp1Bp) in the cytoplasm	28806.3	-0.129409	0.000684731	0.0117983
YMR045C	NA	NA	NA	NA	NA	NA	NA	14448.8	-0.129353	0.000602839	0.010741
YGL103W	RPL28	7	310967	311927	W	uL15|ribosomal 60S subunit protein L28|L15|rp44|YL24|L29|L28|CYH2	Ribosomal 60S subunit protein L28; homologous to mammalian ribosomal protein L27A and bacterial L15; may have peptidyl transferase activity; can mutate to cycloheximide resistance	67834.8	-0.128712	0.0043353	0.0456118
YER095W	RAD51	5	349980	351182	W	recombinase RAD51|MUT5	Strand exchange protein; forms a helical filament with DNA that searches for homology; involved in the recombinational repair of double-strand breaks in DNA during vegetative growth and meiosis; homolog of Dmc1p and bacterial RecA protein	2081.88	-0.128118	0.00225761	0.0287446
YGL187C	COX4	7	149704	150171	C	cytochrome c oxidase subunit IV	Subunit IV of cytochrome c oxidase; the terminal member of the mitochondrial inner membrane electron transport chain; precursor N-terminal 25 residues are cleaved during mitochondrial import; phosphorylated; spermidine enhances translation	1982.22	-0.127815	0.0150496	0.110897
YIL052C	RPL34B	9	256226	257063	C	eL34|ribosomal 60S subunit protein L34B|L34e|L34B	Ribosomal 60S subunit protein L34B; homologous to mammalian ribosomal protein L34, no bacterial homolog; RPL34B has a paralog, RPL34A, that arose from the whole genome duplication	30679	-0.127768	0.00614646	0.0586615
YJR105W	ADO1	10	623581	624603	W	adenosine kinase	Adenosine kinase; required for the utilization of S-adenosylmethionine (AdoMet); may be involved in recycling adenosine produced through the methyl cycle	32559.6	-0.127529	0.00160417	0.0217224
YAL049C	AIM2	1	51855	52595	C	protein AIM2	Cytoplasmic protein involved in mitochondrial function or organization; null mutant displays reduced frequency of mitochondrial genome loss; potential Hsp82p interactor	2148.44	-0.127522	0.00161541	0.0218232
YLR405W	DUS4	12	929789	930892	W	tRNA dihydrouridine synthase	Dihydrouridine synthase; member of a widespread family of conserved proteins including Smm1p, Dus1p, and Dus3p	1846.24	-0.127405	0.00027278	0.00574864
YCR031C	RPS14A	3	177500	178220	C	uS11|ribosomal 40S subunit protein S14A|S11|rp59A|S14A|RPL59|CRY1	Protein component of the small (40S) ribosomal subunit; required for ribosome assembly and 20S pre-rRNA processing; mutations confer cryptopleurine resistance; homologous to mammalian ribosomal protein S14 and bacterial S11; RPS14A has a paralog, RPS14B, that arose from the whole genome duplication	47596.9	-0.127157	5.59999e-05	0.00177077
YDL192W	ARF1	4	116321	116866	W	Arf family GTPase ARF1	ADP-ribosylation factor; GTPase of the Ras superfamily involved in regulation of coated vesicle formation in intracellular trafficking within the Golgi; ARF1 has a paralog, ARF2, that arose from the whole genome duplication; arf1 arf2 double null mutation is complemented by human ARF1, ARF4, ARF5, or ARF6	22595	-0.127148	0.00478488	0.0486519
YBL082C	ALG3	2	69751	71127	C	dolichyl-P-Man:Man(5)GlcNAc(2)-PP-dolichol alpha-1,3-mannosyltransferase|RHK1	Dolichol-P-Man dependent alpha(1-3) mannosyltransferase; involved in synthesis of dolichol-linked oligosaccharide donor for N-linked glycosylation of proteins; G353A missense mutation in human ortholog ALG3 implicated in carbohydrate deficient glycoprotein syndrome type IV, which is characterized by microcephaly, severe epilepsy, minimal psychomotor development, partial deficiency of sialic acids…	2414.17	-0.126906	0.000267732	0.00568561
YAL038W	CDC19	1	71786	73288	W	pyruvate kinase CDC19|PYK1	Pyruvate kinase; functions as a homotetramer in glycolysis to convert phosphoenolpyruvate to pyruvate, the input for aerobic (TCA cycle) or anaerobic (glucose fermentation) respiration; regulated via allosteric activation by fructose bisphosphate; CDC19 has a paralog, PYK2, that arose from the whole genome duplication	301504	-0.126859	2.29247e-05	0.00086797
YMR318C	ADH6	13	911061	912143	C	NADP-dependent alcohol dehydrogenase|ADHVI	NADPH-dependent medium chain alcohol dehydrogenase; has broad substrate specificity; member of the cinnamyl family of alcohol dehydrogenases; may be involved in fusel alcohol synthesis or in aldehyde tolerance; protein abundance increases in response to DNA replication stress	13567.6	-0.126666	0.000316165	0.00639285
YDR016C	DAD1	4	478474	478758	C		Essential subunit of the Dam1 complex (aka DASH complex); complex couples kinetochores to the force produced by MT depolymerization thereby aiding in chromosome segregation; is transferred to the kinetochore prior to mitosis	348.753	-0.126558	0.0265741	0.157664
YDL081C	RPP1A	4	309802	310122	C	P1A|ribosomal protein P1A|RPLA1	Ribosomal stalk protein P1 alpha; involved in the interaction between translational elongation factors and the ribosome; free (non-ribosomal) P1 stimulates the phosphorylation of the eIF2 alpha subunit (Sui2p) by Gcn2p; accumulation of P1 in the cytoplasm is regulated by phosphorylation and interaction with the P2 stalk component	25763.7	-0.126492	0.000738707	0.012467
YLR248W	RCK2	12	634252	636084	W	serine/threonine protein kinase RCK2|CMK3|CLK1	Protein kinase involved in response to oxidative and osmotic stress; identified as suppressor of S. pombe cell cycle checkpoint mutations; similar to CaM (calmodulin) kinases; RCK2 has a paralog, RCK1, that arose from the whole genome duplication	7344.72	-0.126415	7.14818e-06	0.000314107
YDR397C	NCB2	4	1266366	1266898	C	negative cofactor 2 transcription regulator complex subunit NCB2|YDR1	Subunit of a heterodimeric NC2 transcription regulator complex; complex binds to TBP and can repress transcription by preventing preinitiation complex assembly or stimulate activated transcription; homologous to human NC2beta; complex also includes Bur6p	1563.81	-0.126036	0.00859943	0.0752068
YDR154C	YDR154C	4	768403	768753	C		Dubious open reading frame; unlikely to encode a functional protein, based on available experimental and comparative sequence data; null mutant exhibits synthetic phenotype with alpha-synuclein	23004.4	-0.126008	0.000209038	0.00480052
YCR020W-B	HTL1	3	155320	155556	W		Component of the RSC chromatin remodeling complex; RSC functions in transcriptional regulation and elongation, chromosome stability, and establishing sister chromatid cohesion; involved in telomere maintenance	202.168	-0.125827	0.0476226	0.224514
YBL092W	RPL32	2	45978	46370	W	eL32|ribosomal 60S subunit protein L32|L32e|L32	Ribosomal 60S subunit protein L32; overexpression disrupts telomeric silencing; homologous to mammalian ribosomal protein L32, no bacterial homolog	65216.3	-0.12576	0.00460791	0.0472701
YOR234C	RPL33B	15	778555	779405	C	eL33|ribosomal 60S subunit protein L33B|L33e|rp47|Yl37|L37B|L33B|RPL37B	Ribosomal 60S subunit protein L33B; rpl33b null mutant exhibits normal growth while rpl33a rpl33b double null mutant is inviable; homologous to mammalian ribosomal protein L35A, no bacterial homolog; RPL33B has a paralog, RPL33A, that arose from the whole genome duplication	17665.3	-0.125633	0.00288388	0.0340097
YMR265C	YMR265C	13	796540	797925	C		Putative protein of unknown function	1538.97	-0.125591	0.000889822	0.0141072
YLR340W	RPP0	12	805887	806825	W	uL10|ribosomal protein P0|P0|L10E|A0|RPL10E	Conserved ribosomal protein P0 of the ribosomal stalk; involved in interaction between translational elongation factors and the ribosome; phosphorylated on serine 302; homologous to mammalian ribosomal protein LP0 and bacterial L10	102578	-0.125409	0.000210945	0.00481742
YLR297W	YLR297W	12	724044	724433	W		Protein of unknown function; green fluorescent protein (GFP)-fusion protein localizes to the vacuole; not an essential gene; induced by treatment with 8-methoxypsoralen and UVA irradiation; relocalizes from nucleus to vacuole upon DNA replication stress; YLR297W has a paralog, YOR186W, that arose from the whole genome duplication	589.683	-0.125218	0.0440955	0.214954
YDR030C	RAD28	4	501753	503273	C		Protein involved in DNA repair; related to the human CSA protein that is involved in transcription-coupled repair nucleotide excision repair	849.381	-0.125202	0.00373538	0.040869
YDL057W	YDL057W	4	351434	352420	W		Putative protein of unknown function; YDL057W is not an essential gene	530.644	-0.12493	0.0134735	0.102975
YML012W	ERV25	13	246116	246751	W		Member of the p24 family involved in ER to Golgi transport; role in misfolded protein quality control; forms a heterotrimeric complex with Erp1, Erp2p, and Emp24,	11016.5	-0.124903	0.000275677	0.00576916
YDR031W	MIX14	4	503498	503863	W	MIC14	Mitochondrial intermembrane space protein of unknown function; required for normal oxygen consumption; contains twin cysteine-x9-cysteine motifs; protein abundance increases in response to DNA replication stress	355.548	-0.124875	0.0306977	0.171737
YJR055W	HIT1	10	538772	539266	W		Protein involved in C/D snoRNP assembly; regulates abundance of Rsa1p; required for growth at high temperature; similar to human ZNHIT3	551.104	-0.124535	0.0102726	0.0851858
YDL166C	FAP7	4	163449	164042	C	nucleoside-triphosphatase	Essential NTPase required for small ribosome subunit synthesis; mediates processing of the 20S pre-rRNA at site D in the cytoplasm but associates only transiently with 43S preribosomes via Rps14p; complex with Rps14 is conserved between humans, yeast, and arches; may be the endonuclease for site D; depletion leads to accumulation of pre-40S ribosomes in 80S-like ribosomes; human TAF9 functionally…	2188.5	-0.124353	0.00381191	0.0413946
YLR446W	YLR446W	12	1025214	1026515	W	hexokinase	Putative hexokinase; transcript is upregulated during sporulation and the unfolded protein response; YLR446W is not an essential gene	239.611	-0.124117	0.041067	0.207919
YIR036C	IRC24	9	422074	422865	C	sepiapterin reductase family protein IRC24	Putative benzil reductase;(GFP)-fusion protein localizes to the cytoplasm and is induced by the DNA-damaging agent MMS; sequence similarity with short-chain dehydrogenase/reductases; null mutant has increased spontaneous Rad52p foci	1867.02	-0.1241	0.00534098	0.0526324
YPR052C	NHP6A	16	665693	665974	C	high-mobility group nucleosome-binding protein	High-mobility group (HMG) protein; binds to and remodels nucleosomes; involved in recruiting FACT and other chromatin remodelling complexes to chromosomes; functionally redundant with Nhp6Bp; required for transcriptional initiation fidelity of some tRNA genes; homologous to mammalian HMGB1 and HMGB2; NHP6A has a paralog, NHP6B, that arose from the whole genome duplication; protein abundance incre…	2964.81	-0.124098	0.00298909	0.0348929
YBL083C	YBL083C	2	69713	70138	C		Dubious open reading frame; unlikely to encode a functional protein, based on available experimental and comparative sequence data; overlaps verified ORF ALG3	256.892	-0.123774	0.0402506	0.205235
YDL022W	GPD1	4	411825	413000	W	glycerol-3-phosphate dehydrogenase (NAD(+)) GPD1|OSR5|OSG1|HOR1|DAR1	NAD-dependent glycerol-3-phosphate dehydrogenase; key enzyme of glycerol synthesis, essential for growth under osmotic stress; expression regulated by high-osmolarity glycerol response pathway; protein abundance increases in response to DNA replication stress; constitutively inactivated via phosphorylation by the protein kinases Ypk1p and Ypk2p, dephosphorylation increases catalytic activity; for…	7824.19	-0.123574	0.0134639	0.102975
YPL245W	YPL245W	16	85586	86950	W		Putative protein of unknown function; green fluorescent protein (GFP)-fusion protein localizes to both the nucleus and the cytoplasm	2792.45	-0.123485	0.000447731	0.00847596
YDR002W	YRB1	4	453045	453650	W	Ran GTPase-binding protein YRB1|STP52|SFO1|HTN1|CST20	Ran GTPase binding protein; involved in nuclear protein import and RNA export, ubiquitin-mediated protein degradation during the cell cycle; shuttles between the nucleus and cytoplasm; is essential; homolog of human RanBP1	16867.4	-0.123112	0.00656037	0.0613902
YJR077C	MIR1	10	577255	578190	C	PTP	Mitochondrial phosphate carrier; imports inorganic phosphate into mitochondria; functionally redundant with Pic2p but more abundant than Pic2p under normal conditions; phosphorylated	8770.21	-0.122843	0.00144802	0.020375
YKL161C	KDX1	11	149386	150687	C	putative protein kinase KDX1|MLP1	Protein kinase; implicated in Slt2p mitogen-activated (MAP) kinase signaling pathway; interacts with numerous components in the mating pheromone and CWI MAPK pathways; associates with Rlm1p; KDX1 has a paralog, SLT2, that arose from the whole genome duplication	504.327	-0.122663	0.0155122	0.113434
YLR044C	PDC1	12	232390	234081	C	indolepyruvate decarboxylase 1	Major of three pyruvate decarboxylase isozymes; key enzyme in alcoholic fermentation; decarboxylates pyruvate to acetaldehyde; involved in amino acid catabolism; subject to glucose-, ethanol-, and autoregulation; activated by phosphorylation in response to glucose levels; N-terminally propionylated in vivo	334757	-0.122367	0.000172032	0.00410807
YBL072C	RPS8A	2	88523	89125	C	eS8|ribosomal 40S subunit protein S8A|S8e|rp19|YS9|S8A|S14A	Protein component of the small (40S) ribosomal subunit; homologous to mammalian ribosomal protein S8, no bacterial homolog; RPS8A has a paralog, RPS8B, that arose from the whole genome duplication	74674.9	-0.122283	0.00110373	0.016624
YJL190C	RPS22A	10	74910	75302	C	uS8|ribosomal 40S subunit protein S22A|S8|rp50|YS22|S24A|S22A|RPS24	Protein component of the small (40S) ribosomal subunit; homologous to mammalian ribosomal protein S15A and bacterial S8; RPS22A has a paralog, RPS22B, that arose from the whole genome duplication	46621.9	-0.121824	0.00893794	0.0768876
YPL148C	PPT2	16	272294	272815	C	holo-[acyl-carrier-protein] synthase	Phosphopantetheine:protein transferase (PPTase); activates mitochondrial acyl carrier protein (Acp1p) by phosphopantetheinylation	305.325	-0.121797	0.0308517	0.17188
YER019W	ISC1	5	192797	194230	W	inositol phosphosphingolipid phospholipase	Inositol phosphosphingolipid phospholipase C; mitochondrial membrane localized; hydrolyzes complex sphingolipids to produce ceramide; activates genes required for non-fermentable carbon source metabolism during diauxic shift; activated by phosphatidylserine, cardiolipin, and phosphatidylglycerol; mediates Na+ and Li+ halotolerance; ortholog of mammalian neutral sphingomyelinase type 2	2561.99	-0.121781	0.00280093	0.0334719
YFR006W	YFR006W	6	156145	157752	W	putative Xaa-Pro dipeptidase	Putative X-Pro aminopeptidase; green fluorescent protein (GFP)-fusion protein localizes to the cytoplasm; YFR006W is not an essential gene	3962.17	-0.121695	6.35118e-05	0.00196511
YDR447C	RPS17B	4	1354829	1355553	C	eS17|ribosomal 40S subunit protein S17B|S17e|rp51B|S17B|RPL51B|RP51B	Ribosomal protein 51 (rp51) of the small (40s) subunit; homologous to mammalian ribosomal protein S17, no bacterial homolog; RPS17B has a paralog, RPS17A, that arose from the whole genome duplication; protein abundance increases in response to DNA replication stress	22975.1	-0.121604	0.00661893	0.0617374
YGR151C	YGR151C	7	794655	794990	C		Dubious open reading frame; unlikely to encode a functional protein, based on available experimental and comparative sequence data; overlaps almost completely with the verified ORF RSR1/BUD1/YGR152C; relative distribution to the nucleus increases upon DNA replication stress	347.261	-0.121391	0.0516325	0.233238
YPR080W	TEF1	16	700594	701970	W	translation elongation factor EF-1 alpha|eEF1A|EF-1 alpha	Translational elongation factor EF-1 alpha; in the GTP-bound active form, binds to and delivers aminoacylated tRNA to the A-site of ribosomes for elongation of nascent polypeptides; associates with vacuolar Rho1p GTPase; may also have a role in tRNA re-export from the nucleus; TEF1 has a paralog, TEF2, that arose from the whole genome duplication	441701	-0.121126	0.000420475	0.00803932
YKR039W	GAP1	11	515063	516871	W	amino acid permease GAP1	General amino acid permease; Gap1p senses the presence of amino acid substrates to regulate localization to the plasma membrane when needed; essential for invasive growth	895.517	-0.121102	0.0076541	0.0682936
YGR118W	RPS23A	7	726974	727730	W	uS12|ribosomal 40S subunit protein S23A|rp37|YS14|S28A|S23A|S12	Ribosomal protein 28 (rp28) of the small (40S) ribosomal subunit; required for translational accuracy; homologous to mammalian ribosomal protein S23 and bacterial S12; RPS23A has a paralog, RPS23B, that arose from the whole genome duplication; deletion of both RPS23A and RPS23B is lethal	40352.8	-0.120869	0.00655839	0.0613902
YJR160C	MPH3	10	738008	739816	C	alpha-glucoside permease	Alpha-glucoside permease; transports maltose, maltotriose, alpha-methylglucoside, and turanose; identical to Mph2p; encoded in a subtelomeric position in a region likely to have undergone duplication	40.3261	-0.12083	0.0261626	0.156094
YKR076W	ECM4	11	582283	583395	W	S-glutathionyl-(chloro)hydroquinone reductase|GTO2	S-glutathionyl-(chloro)hydroquinone reductase (GS-HQR); glutathione transferase involved in cell-surface biosynthesis and architecture; catalyzes glutathione (GSH)-dependent reduction of GS-trichloro-p-hydroquinone to trichloro-p-hydroquinone; expression upregulated upon exposure to genotoxic agents, such as methyl methanesulfonate, cisplatin and bleomycin; not an essential gene; similar to YGR15…	629.898	-0.119907	0.0411778	0.207919
YNL115C	YNL115C	14	410119	412053	C		Putative protein of unknown function; green fluorescent protein (GFP)-fusion protein localizes to mitochondria; YNL115C is not an essential gene	2428.35	-0.11988	0.000880859	0.0140089
YER117W	RPL23B	5	396769	397653	W	uL14|ribosomal 60S subunit protein L23B|L14|YL32|L23B|L17aB	Ribosomal 60S subunit protein L23B; homologous to mammalian ribosomal protein L23 and bacterial L14; RPL23B has a paralog, RPL23A, that arose from the whole genome duplication	39519.3	-0.119782	0.0100989	0.0843294
YOR367W	SCP1	15	1026007	1026609	W		Component of yeast cortical actin cytoskeleton; binds and cross links actin filaments; originally identified by its homology to calponin (contains a calponin-like repeat) but the Scp1p domain structure is more similar to transgelin	1352.89	-0.119489	0.00192761	0.0253274
YML001W	YPT7	13	267174	267800	W	Rab family GTPase YPT7|VAM4|AST4	Rab family GTPase; GTP-binding protein of the rab family; required for homotypic fusion event in vacuole inheritance, for endosome-endosome fusion; localizes to sites of contact between the vacuole and mitochondria (vCLAMPs); interacts with the cargo selection/retromer complex for retrograde sorting; similar to mammalian Rab7	4183.9	-0.119375	0.00118012	0.0174143
YBR114W	RAD16	2	467248	469620	W	DNA repair protein RAD16|PSO5	Nucleotide excision repair (NER) protein; binds damaged DNA during NER; binds DNA in an ATP-dependent manner (with Rad7p) during NER; required for NER of non-transcribed chromatin; subunit of Nucleotide Excision Repair Factor 4 (NEF4) and the Elongin-Cullin-Socs (ECS) ligase complex	2456.2	-0.119193	0.00199886	0.0261025
YJR104C	SOD1	10	622550	623014	C	superoxide dismutase SOD1|CRS4	Cytosolic copper-zinc superoxide dismutase; detoxifies superoxide; stabilizes Yck1p and Yck2p kinases in glucose to repress respiration; phosphorylated by Dun1p, enters nucleus under oxidative stress to promote transcription of stress response genes; human ortholog SOD1 implicated in ALS complements a null allele; abundance increases under DNA replication stress and during exposure to boric acid;…	29727.8	-0.118854	0.00274256	0.0328821
YJR063W	RPA12	10	555195	555572	W	DNA-directed RNA polymerase I core subunit RPA12|A12.2|RRN4	RNA polymerase I subunit A12.2; contains two zinc binding domains, and the N terminal domain is responsible for anchoring to the RNA pol I complex; physically interacts with transcriptional activator Msn4p, to regulate transcription of AYR1, a gene involved in lipid metabolism	1829.28	-0.118824	0.0105015	0.0863375
YFR031C-A	RPL2A	6	220507	221418	C	uL2|ribosomal 60S subunit protein L2A|L2|rp8|YL6|L5A|L2A|RPL5B	Ribosomal 60S subunit protein L2A; homologous to mammalian ribosomal protein L2 and bacterial L2; RPL2A has a paralog, RPL2B, that arose from the whole genome duplication	67447.9	-0.118805	0.000232278	0.00514138
YCL005W-A	VMA9	3	107023	107417	W	H(+)-transporting V0 sector ATPase subunit e|LDB10|CWH36	Vacuolar H+ ATPase subunit e of the V-ATPase V0 subcomplex; essential for vacuolar acidification; interacts with the V-ATPase assembly factor Vma21p in the ER; involved in V0 biogenesis	2004.35	-0.118467	0.0183953	0.12573
YLR099C	ICT1	12	339744	340928	C	lysophosphatidic acid acyltransferase ICT1	Lysophosphatidic acid acyltransferase; responsible for enhanced phospholipid synthesis during organic solvent stress; null displays increased sensitivity to Calcofluor white; highly expressed during organic solvent stress; ICT1 has a paralog, ECM18, that arose from the whole genome duplication; human ABHD5 can complement ict1 null mutant	1059.96	-0.118366	0.0104491	0.0860294
YBR116C	YBR116C	2	474199	474726	C		Dubious open reading frame; unlikely to encode a functional protein, based on available experimental and comparative sequence data; partially overlaps the verified gene TKL2	16.0705	-0.117339	0.00872489	0.0758486
YLL018C-A	COX19	12	108676	108972	C		Protein required for cytochrome c oxidase assembly; located in the cytosol and mitochondrial intermembrane space; putative copper metallochaperone that delivers copper to cytochrome c oxidase; contains twin cysteine-x9-cysteine motifs	310.308	-0.117165	0.0507309	0.231161
YDR321W	ASP1	4	1108702	1109847	W	asparaginase ASP1	Cytosolic L-asparaginase, involved in asparagine catabolism; catalyzes hydrolysis of L-asparagine to aspartic acid and ammonia; important enzyme for the treatment of acute lymphoblastic leukemia; has low glutaminase activity and dependence; synthesized constitutively	10062.2	-0.117096	0.00016766	0.00404876
YAR018C	KIN3	1	170396	171703	C	serine/threonine protein kinase KIN3|NPK1|FUN52	Nonessential serine/threonine protein kinase; possible role in DNA damage response; influences tolerance to high levels of ethanol	1364.68	-0.116262	0.00177011	0.0236309
YDR012W	RPL4B	4	471853	472941	W	uL4|ribosomal 60S subunit protein L4B|L4|rp2|YL2|L4B|L2B	Ribosomal 60S subunit protein L4B; homologous to mammalian ribosomal protein L4 and bacterial L4; RPL4B has a paralog, RPL4A, that arose from the whole genome duplication	50393.1	-0.116202	3.48235e-06	0.000168411
YDR210W	YDR210W	4	871074	871301	W		Predicted tail-anchored plasma membrane protein; contains a conserved CYSTM module; related proteins in other organisms may be involved in response to stress; green fluorescent protein (GFP)-fusion protein localizes to the cell periphery	148.83	-0.116128	0.0719818	0.284126
YPL234C	VMA11	16	104946	105440	C	H(+)-transporting V0 sector ATPase subunit c'|TFP3|CLS9	Vacuolar ATPase V0 domain subunit c'; involved in proton transport activity; hydrophobic integral membrane protein (proteolipid) containing four transmembrane segments; N and C termini are in the vacuolar lumen	5642.77	-0.115915	0.00370353	0.0405977
YOR338W	YOR338W	15	956898	957989	W		Putative protein of unknown function; YOR338W transcription is regulated by Azf1p and its transcript is a specific target of the G protein effector Scp160p; identified as being required for sporulation in a high-throughput mutant screen; YOR338W has a paralog, FUN19, that arose from the whole genome duplication	1333.21	-0.11557	0.0751046	0.291258
YJR070C	LIA1	10	569621	570598	C	MMD1	Deoxyhypusine hydroxylase; HEAT-repeat containing metalloenzyme that catalyzes hypusine formation; binds to and is required for the modification of Hyp2p (eIF5A); complements S. pombe mmd1 mutants defective in mitochondrial positioning; protein abundance increases in response to DNA replication stress	13355.3	-0.115481	0.000147645	0.00364676
YOR332W	VMA4	15	943656	944357	W	H(+)-transporting V1 sector ATPase subunit E	Subunit E of the V1 domain of the vacuolar H+-ATPase (V-ATPase); V-ATPase is an electrogenic proton pump found throughout the endomembrane system; V1 domain has eight subunits; required for the V1 domain to assemble onto the vacuolar membrane; protein abundance increases in response to DNA replication stress	16652.6	-0.115211	0.00043023	0.00817153
YBR031W	RPL4A	2	300166	301254	W	uL4|ribosomal 60S subunit protein L4A|L4|rp2|YL2|L4A|L2A	Ribosomal 60S subunit protein L4A; N-terminally acetylated; homologous to mammalian ribosomal protein L4 and bacterial L4; RPL4A has a paralog, RPL4B, that arose from the whole genome duplication	116976	-0.115082	9.77065e-05	0.00263991
YCL036W	GFD2	3	59026	60726	W	YCD6	Protein of unknown function; identified as a high-copy suppressor of a dbp5 mutation; GFD2 has a paralog, YDR514C, that arose from the whole genome duplication	4778.74	-0.115003	0.00739561	0.0670263
YPL078C	ATP4	16	408010	408744	C	F1F0 ATP synthase subunit 4|LPF7	Subunit b of the stator stalk of mitochondrial F1F0 ATP synthase; ATP synthase is a large, evolutionarily conserved enzyme complex required for ATP synthesis; contributes to the oligomerization of the complex, which in turn determines the shape of inner membrane cristae; phosphorylated	6129.76	-0.114996	0.00530121	0.0523912
YHR040W	BCD1	8	187924	189024	W		Essential protein required for the accumulation of box C/D snoRNA	2036.47	-0.114702	0.00333146	0.0375933
YIL047C-A	YIL047C-A	9	265099	265467	C		Dubious open reading frame; unlikely to encode a functional protein, based on available experimental and comparative sequence data; almost completely overlaps ORF SYG1/YIL047C	829.81	-0.114364	0.0319015	0.176024
YIR032C	DAL3	9	415030	415617	C	ureidoglycolate hydrolase	Ureidoglycolate lyase; converts ureidoglycolate to glyoxylate and urea in the third step of allantoin degradation; expression is sensitive to nitrogen catabolite repression; this enzyme is sometimes referred to "ureidoglycolate hydrolase" but should not be confused with the Arabidopsis thaliana ureidoglycolate hydrolase enzyme which converts ureidoglycolate to glyoxylate, ammonia and carbon dioxi…	102.546	-0.114272	0.0791335	0.301407
YER180C-A	SLO1	5	550865	551122	C		Protein interacting with Arl3p; Arl3p is a GTPase of the Ras superfamily involved in vesicle-tethering at the Golgi; putative ortholog of human SCOCO	98.7576	-0.114227	0.0793037	0.301647
YBR128C	ATG14	2	493081	494115	C	APG14|CVT12	Autophagy-specific subunit of phosphatidylinositol 3-kinase complex I; Atg14p targets complex I to the phagophore assembly site (PAS); required for localizing additional ATG proteins to the PAS; required for overflow degradation of misfolded proteins when ERAD is saturated; homolog of human Barkor; other members are Vps34, Vps15, and Vps30p	158.275	-0.114099	0.0756845	0.292644
YIR037W	HYR1	9	423128	423619	W	peroxiredoxin HYR1|ORP1|GPX3	Thiol peroxidase; functions as a hydroperoxide receptor to sense intracellular hydroperoxide levels and transduce a redox signal to the Yap1p transcription factor; HYR1 has a paralog, GPX1, that arose from the whole genome duplication	3782.3	-0.113949	0.0132999	0.10242
YJL167W	ERG20	10	105014	106072	W	bifunctional (2E,6E)-farnesyl diphosphate synthase/dimethylallyltranstransferase|FPP1|FDS1|BOT3	Farnesyl pyrophosphate synthetase; has both dimethylallyltranstransferase and geranyltranstransferase activities; catalyzes the formation of C15 farnesyl pyrophosphate units for isoprenoid and sterol biosynthesis	20359.3	-0.113804	7.98787e-05	0.00228707
YHL015W	RPS20	8	75412	75777	W	uS10|ribosomal 40S subunit protein S20|S10|URP2	Protein component of the small (40S) ribosomal subunit; overproduction suppresses mutations affecting RNA polymerase III-dependent transcription; homologous to mammalian ribosomal protein S20 and bacterial S10	53457	-0.113382	0.0256618	0.155618
YMR303C	ADH2	13	873291	874337	C	alcohol dehydrogenase ADH2|ADR2	Glucose-repressible alcohol dehydrogenase II; catalyzes the conversion of ethanol to acetaldehyde; involved in the production of certain carboxylate esters; regulated by ADR1	140.502	-0.113381	0.0747453	0.290648
YLR074C	BUD20	12	281956	282456	C		C2H2-type zinc finger protein required for ribosome assembly; shuttling factor which associates with pre-60S particles in the nucleus, accompanying them to the cytoplasm; cytoplasmic dissociation of Bud20p requires Drg1p; N-terminus harbors a nuclear localization signal (NLS) and a nuclear export signal (NES); cytoplasmic Bud20p is reimported by Kap123-dependent pathway; involved in bud-site sele…	4746.87	-0.113316	0.0136608	0.103932
YOR004W	UTP23	15	333592	334356	W	rRNA-binding ribosome biosynthesis protein UTP23	Component of the small subunit processome; involved in 40S ribosomal subunit biogenesis; interacts with snR30 and is required for dissociation of snR30 from large pre-ribosomal particles; has homology to PINc domain protein Fcf1p, although the PINc domain of Utp23p is not required for function; essential protein	3227.62	-0.113211	0.00640045	0.0603846
YHL011C	PRS3	8	80654	81616	C	ribose phosphate diphosphokinase subunit PRS3	5-phospho-ribosyl-1(alpha)-pyrophosphate synthetase; synthesizes PRPP, which is required for nucleotide, histidine, and tryptophan biosynthesis; one of five related enzymes, which are active as heteromultimeric complexes	9677.75	-0.113057	7.59785e-05	0.00222525
YGR066C	YGR066C	7	620921	621799	C		Putative protein of unknown function	25.1464	-0.113019	0.0286582	0.164851
YNL065W	AQR1	14	503724	505484	W		Plasma membrane transporter of the major facilitator superfamily; member of the 12-spanner drug:H(+) antiporter DHA1 family; confers resistance to short-chain monocarboxylic acids and quinidine; involved in the excretion of excess amino acids; AQR1 has a paralog, QDR1, that arose from the whole genome duplication; relocalizes from plasma membrane to cytoplasm upon DNA replication stress	7909.5	-0.112983	0.0804356	0.303055
YNL209W	SSB2	14	252059	253900	W	Hsp70 family ATPase SSB2|YG103	Cytoplasmic ATPase that is a ribosome-associated molecular chaperone; functions with J-protein partner Zuo1p; may be involved in the folding of newly-synthesized polypeptide chains; member of the HSP70 family; SSB2 has a paralog, SSB1, that arose from the whole genome duplication	113985	-0.112853	3.86939e-05	0.0013099
YJL126W	NIT2	10	184501	185424	W	putative hydrolase	Nit protein; one of two proteins in S. cerevisiae with similarity to the Nit domain of NitFhit from fly and worm and to the mouse and human Nit protein which interacts with the Fhit tumor suppressor; nitrilase superfamily member	734.216	-0.11267	0.0193723	0.129939
YIL013C	PDR11	9	328207	332442	C	ATP-binding cassette multidrug transporter PDR11	ATP-binding cassette (ABC) transporter; multidrug transporter involved in multiple drug resistance; mediates sterol uptake when sterol biosynthesis is compromised; regulated by Pdr1p; required for anaerobic growth; PDR11 has a paralog, AUS1, that arose from the whole genome duplication	617.557	-0.1126	0.0325466	0.178897
YIL051C	MMF1	9	257843	258280	C	isoleucine biosynthesis protein MMF1|IBM1	Mitochondrial protein required for transamination of isoleucine; but not of valine or leucine; may regulate specificity of branched-chain transaminases Bat1p and Bat2p; induction of expression in response to stress is mediated by a Hog1p-regulated antisense RNA and gene looping; interacts genetically with mitochondrial ribosomal protein genes; MMF1 has a paralog, HMF1, that arose from the whole g…	8104.31	-0.112288	0.00421281	0.0448146
YIR012W	SQT1	9	378486	379781	W		Specific chaperone for ribosomal protein Rpl10p; binds nascent Rpl10p during translation; contains multiple WD repeats; interacts with Qsr1p in a two-hybrid assay; protein abundance increases in response to DNA replication stress	10080.1	-0.112207	0.000861025	0.0138801
YLR075W	RPL10	12	282927	283592	W	uL16|ribosomal 60S subunit protein L10|L16|L10|QSR1|GRC5	Ribosomal 60S subunit protein L10; homologous to mammalian ribosomal protein L10 and bacterial L16; responsible for joining the 40S and 60S subunits; regulates translation initiation; similar to members of the QM gene family; protein abundance increases under DNA replication stress; mutations in human homolog implicated in T-cell acute lymphoblastic leukemia and also autism spectrum disorders (AS…	118456	-0.112141	0.00989204	0.0834731
YAL046C	BOL3	1	57029	57385	C	AIM1	Protein involved in Fe-S cluster transfer to mitochondrial clients; protects [4Fe-4S] clusters from damage due to oxidative stress by acting along with Nfu1p at a late step in the transfer of [4Fe-4S] clusters from the ISA complex to mitochondrial client proteins like lipoate synthase and succinate dehydrogenase; sequence similarity to human BOLA family member, BOLA3, mutations of which are assoc…	848.029	-0.112093	0.0343282	0.185501
YKR025W	RPC37	11	487770	488618	W	DNA-directed RNA polymerase III subunit C37|C37	RNA polymerase III subunit C37	3758.88	-0.111933	0.00553067	0.0539474
YKL024C	URA6	11	392526	393140	C	bifunctional uridylate/adenylate kinase|SOC8	Uridylate kinase; catalyzes the seventh enzymatic step in the de novo biosynthesis of pyrimidines, converting uridine monophosphate (UMP) into uridine-5'-diphosphate (UDP)	4123.39	-0.111893	0.000194048	0.00452124
YIL007C	NAS2	9	342994	343656	C		Evolutionarily conserved 19S regulatory particle assembly-chaperone; involved in assembly of the base subcomplex of the 19S proteasomal regulatory particle (RP); non-essential gene; interacts with Rpn4p; protein abundance increases in response to DNA replication stress; ortholog of human p27	696.177	-0.111631	0.0179998	0.124058
YGR014W	MSB2	7	516943	520863	W		Mucin family member involved in various signaling pathways; functions as osmosensor in the Sho1p-mediated HOG pathway; functions in Cdc42p- and MAP kinase-dependent filamentous growth signaling pathway; processed into secreted and cell-associated forms by aspartyl protease Yps1p; potential Cdc28p substrate	7412.31	-0.111603	0.00314802	0.0361614
YFL045C	SEC53	6	43628	44392	C	phosphomannomutase SEC53|ALG4	Phosphomannomutase; involved in synthesis of GDP-mannose and dolichol-phosphate-mannose; required for folding and glycosylation of secretory proteins in the ER lumen	23456	-0.111357	0.00135329	0.0194219
YPR192W	AQY1	16	921860	922777	W		Spore-specific water channel; mediates the transport of water across cell membranes, developmentally controlled; may play a role in spore maturation, probably by allowing water outflow, may be involved in freeze tolerance	41.8625	-0.1113	0.0612847	0.256821
YIL047C	SYG1	9	265115	267823	C		Plasma membrane protein of unknown function; truncation and overexpression suppresses lethality of G-alpha protein deficiency	10717.4	-0.110821	7.98093e-06	0.00034534
YPL154C	PEP4	16	259714	260931	C	proteinase A|yscA|PRA1|PHO9	Vacuolar aspartyl protease (proteinase A); required for posttranslational precursor maturation of vacuolar proteinases; important for protein turnover after oxidative damage; plays a protective role in acetic acid induced apoptosis; synthesized as a zymogen, self-activates	17938.3	-0.110745	0.000712155	0.0120898
YHR203C	RPS4B	8	504476	505530	C	eS4|ribosomal 40S subunit protein S4B|S4e|rp5|YS6|S7B|S4B	Protein component of the small (40S) ribosomal subunit; homologous to mammalian ribosomal protein S4, no bacterial homolog; RPS4B has a paralog, RPS4A, that arose from the whole genome duplication	64749.9	-0.110735	0.000473765	0.00888117
YNL194C	YNL194C	14	272710	273615	C		Integral membrane protein; required for sporulation and plasma membrane sphingolipid content; similar to SUR7; GFP-fusion protein is induced in response to the DNA-damaging agent MMS; GFP-fusion protein is more abundant at MCCs (membrane compartment occupied by Can1) in the presence of glycerol and oleate; YNL194C has a paralog, FMP45, that arose from the whole genome duplication	43.3248	-0.110555	0.0636166	0.262259
YCR012W	PGK1	3	137746	138996	W	phosphoglycerate kinase	3-phosphoglycerate kinase; catalyzes transfer of high-energy phosphoryl groups from the acyl phosphate of 1,3-bisphosphoglycerate to ADP to produce ATP; key enzyme in glycolysis and gluconeogenesis	263991	-0.110346	0.00406157	0.0433661
YJR021C	REC107	10	468555	469579	C	MER2	Protein involved in early stages of meiotic recombination; involved in coordination between the initiation of recombination and the first division of meiosis; part of a complex (Rec107p-Mei4p-Rec114p) required for ds break formation	637.352	-0.110085	0.0222716	0.142732
YPR036W	VMA13	16	643836	645272	W	H(+)-transporting V1 sector ATPase subunit H|CLS11	Subunit H of the V1 peripheral membrane domain of V-ATPase; part of the electrogenic proton pump found throughout the endomembrane system; serves as an activator or a structural stabilizer of the V-ATPase; the V1 peripheral membrane domain of the vacuolar H+-ATPase (V-ATPase) has eight subunits	21477.8	-0.109858	0.000361986	0.00710999
YER031C	YPT31	5	214076	214747	C	Rab family GTPase YPT31|YPT8	Rab family GTPase; involved in the exocytic pathway; mediates intra-Golgi traffic or the budding of post-Golgi vesicles from the trans-Golgi; YPT31 has a paralog, YPT32, that arose from the whole genome duplication; localizes to the transitional and late Golgi	6047.14	-0.109819	0.000994312	0.0155496
YPL221W	FLC1	16	133043	135424	W	flavin adenine dinucleotide transporter|BOP1|HUF1	Flavin adenine dinucleotide transporter; required for uptake of FAD into endoplasmic reticulum; involved in cell wall maintenance; FLC1 has a paralog, FLC3, that arose from the whole genome duplication	6818.91	-0.109563	0.000769006	0.0128967
YHR129C	ARP1	8	362999	364153	C	actin-related protein 1|ACT5	Actin-related protein of the dynactin complex; required for spindle orientation and nuclear migration; forms actin-like short filament composed of 9 or 10 Arp1p monomers; putative ortholog of mammalian centractin	1191.83	-0.109548	0.00711987	0.0653506
YGL123W	RPS2	7	277617	278381	W	uS5|ribosomal 40S subunit protein S2|rp12|Ys5|S5|S4|S2|SUP138|SUP44|SUP38|RPS4	Protein component of the small (40S) subunit; essential for control of translational accuracy; phosphorylation by C-terminal domain kinase I (CTDK-I) enhances translational accuracy; methylated on one or more arginine residues by Hmt1p; homologous to mammalian ribosomal protein S2 and bacterial S5	143435	-0.109257	0.0178564	0.123354
YLR170C	APS1	12	500579	501049	C	YAP19	Small subunit of the clathrin-associated adaptor complex AP-1; AP-1 is involved in protein sorting at the trans-Golgi network; homolog of the sigma subunit of the mammalian clathrin AP-1 complex	910.162	-0.108752	0.0296119	0.168229
YIL009C-A	EST3	9	335666	336212	C	telomerase subunit EST3	Component of the telomerase holoenzyme; involved in telomere replication; synthesis of the full-length protein results from a programmed +1 ribosomal frameshift	959.21	-0.108614	0.0174832	0.121811
YHL033C	RPL8A	8	35255	36025	C	eL8|ribosomal 60S subunit protein L8A|L8e|rp6|YL5|L8A|L4A|MAK7	Ribosomal 60S subunit protein L8A; required for processing of 27SA3 pre-rRNA to 27SB pre-rRNA during assembly of large ribosomal subunit; depletion leads to a turnover of pre-rRNA; L8 binds to Domain I of 25S and 5.8 S rRNAs; mutation results in decreased amounts of free 60S subunits; homologous to mammalian ribosomal protein L7A, no bacterial homolog; RPL8A has a paralog, RPL8B, that arose from …	40221	-0.108362	0.000669545	0.0116412
YDR115W	MRX14	4	682175	682492	W	putative mitochondrial 54S ribosomal protein	Putative mitochondrial ribosomal protein of the large subunit; similar to E. coli L34 ribosomal protein; required for respiratory growth, as are most mitochondrial ribosomal proteins; protein increases in abundance and relocalizes to the plasma membrane upon DNA replication stress	597.178	-0.108281	0.0417659	0.209337
YGL225W	VRG4	7	76894	77907	W	GDP-mannose transporter|VIG4|LDB3|GOG5|VAN2	Golgi GDP-mannose transporter; regulates Golgi function and glycosylation in Golgi; VRG4 has a paralog, HVG1, that arose from the whole genome duplication	11287	-0.107999	0.00134877	0.0194054
YJL059W	YHC3	10	324964	326190	W	amino acid transporter YHC3|BTN1	Protein required for the ATP-dependent transport of arginine; vacuolar membrane protein; involved in the ATP-dependent transport of arginine into the vacuole and possibly in balancing ion homeostasis; human homolog CLN3 involved in Batten disease (juvenile onset neuronal ceroid lipofuscinosis) can complement yeast null mutant	892.592	-0.107872	0.0135386	0.103198
YER099C	PRS2	5	358105	359061	C	ribose phosphate diphosphokinase subunit PRS2	5-phospho-ribosyl-1(alpha)-pyrophosphate synthetase, synthesizes PRPP; which is required for nucleotide, histidine, and tryptophan biosynthesis; one of five related enzymes, which are active as heteromultimeric complexes; PRS2 has a paralog, PRS4, that arose from the whole genome duplication	3015.84	-0.107515	0.000698086	0.0118861
YMR143W	RPS16A	13	551928	552903	W	uS9|ribosomal 40S subunit protein S16A|S9|rp61R|S16A	Protein component of the small (40S) ribosomal subunit; homologous to mammalian ribosomal protein S16 and bacterial S9; RPS16A has a paralog, RPS16B, that arose from the whole genome duplication	40328.3	-0.107512	0.0198077	0.131784
YER115C	SPR6	5	394292	394867	C		Protein of unknown function; expressed during sporulation; not required for sporulation, but gene exhibits genetic interactions with other genes required for sporulation	758.745	-0.107235	0.0295366	0.167968
YGR057C	LST7	7	604773	605501	C		Subunit of the Lst4p-Lst7p GTPase activating protein complex for Gtr2p; stimulates the GTPase activity of Rag family GTPase Gtr2p, within the context of the Gtr1p-Gtr2p heterodimer, after amino acid stimulation; required for activation of TORC1 in response to amino acid stimulation; recruited to the vacuolar membrane during amino acid starvation and released from the membrane by TORC1; required f…	1146.55	-0.107226	0.00561478	0.0545829
YNR057C	BIO4	14	733356	734069	C	dethiobiotin synthase	Dethiobiotin synthetase; catalyzes the third step in the biotin biosynthesis pathway; BIO4 is in a cluster of 3 genes (BIO3, BIO4, and BIO5) that mediate biotin synthesis; BIO3 and BIO4 were acquired by horizontal gene transfer (HGT) from bacteria; expression appears to be repressed at low iron levels	525.86	-0.107095	0.04258	0.211419
YDL123W	SNA4	4	241418	241840	W		Protein of unknown function; localized to the vacuolar outer membrane; predicted to be palmitoylated	571.368	-0.107073	0.0518997	0.233711
YPR168W	NUT2	16	878076	878549	W	mediator complex subunit NUT2|MED10	Subunit of the RNA polymerase II mediator complex; conserved from yeast to human; associates with core polymerase subunits to form the RNA polymerase II holoenzyme; required for transcriptional activation and has a role in basal transcription; protein abundance increases in response to DNA replication stress	390.275	-0.106896	0.054466	0.241488
YBR056W	YBR056W	2	347879	349384	W	17-beta-hydroxysteroid dehydrogenase-like protein	Putative glycoside hydrolase of the mitochondrial intermembrane space	3742.31	-0.106809	0.0161418	0.116455
YOR251C	TUM1	15	802550	803464	C	thiosulfate sulfurtransferase	Rhodanese domain sulfur transferase; accepts persulfite from Nfs1p and transfers it to Uba4p in the pathway for 2-thiolation of the wobble uridine base of tRNAs; also stimulates sulfur transfer by Nfs1p; may be mitochondrially localized	3247.87	-0.106752	0.00164819	0.022162
YER119C	AVT6	5	399496	400842	C	aspartate/glutamate transporter	Vacuolar aspartate and glutamate exporter; member of a family of seven genes (AVT1-7) related to vesicular GABA-glycine transporters; involved in compartmentalizing acidic amino acids in response to nitrogen starvation; AVT6 has a paralog, AVT5, that arose from the whole genome duplication	1239.37	-0.106731	0.0521983	0.234362
YOR369C	RPS12	15	1028194	1028625	C	eS12|ribosomal 40S subunit protein S12|S12e|S12	Protein component of the small (40S) ribosomal subunit; homologous to mammalian ribosomal protein S12, no bacterial homolog	80818.4	-0.106601	0.0155085	0.113434
YNL158W	PGA1	14	339612	340208	W		Essential component of GPI-mannosyltransferase II; complex is responsible for second mannose addition to GPI precursors as a partner of Gpi18p; required for maturation of Gas1p and Pho8p; has synthetic genetic interactions with secretory pathway genes	995.825	-0.10651	0.014573	0.108496
YML108W	YML108W	13	54793	55110	W		Protein of unknown function; structure defines a new subfamily of the split beta-alpha-beta sandwiches; green fluorescent protein (GFP)-fusion protein localizes to the cytoplasm and nucleus; YML108W is not an essential gene; relative distribution to the nucleus increases upon DNA replication stress	708.23	-0.106416	0.0445275	0.216067
YMR002W	MIX17	13	272193	272663	W	MIC17	Mitochondrial intermembrane space protein; required for normal oxygen consumption; contains twin cysteine-x9-cysteine motifs; protein abundance increases in response to DNA replication stress	5017.34	-0.106255	0.0137633	0.104358
YPL211W	NIP7	16	153495	154040	W	ribosome biosynthesis protein NIP7	Nucleolar protein required for 60S ribosome subunit biogenesis; constituent of 66S pre-ribosomal particles; physically interacts with Nop8p and the exosome subunit Rrp43p	3812.26	-0.106208	0.011701	0.0931389
YMR142C	RPL13B	13	550206	551207	C	eL13|ribosomal 60S subunit protein L13B|L13e|L13B	Ribosomal 60S subunit protein L13B; not essential for viability; homologous to mammalian ribosomal protein L13, no bacterial homolog; RPL13B has a paralog, RPL13A, that arose from the whole genome duplication	55948.4	-0.106172	0.00438793	0.0459287
YDR139C	RUB1	4	733618	733924	C	NEDD8 family protein RUB1	Ubiquitin-like protein with similarity to mammalian NEDD8; conjugation (neddylation) substrates include the cullins Cdc53p, Rtt101p, and Cul3p; activated by Ula1p and Uba3p (E1 enzyme pair); conjugation mediated by Ubc12p (E2 enzyme)	548.851	-0.106114	0.0644069	0.264631
YGR203W	YCH1	7	905237	905683	W	phosphatase YCH1	Phosphatase with sequence similarity to Cdc25p; Arr2p and Mih1p; member of the single-domain rhodanese homology superfamily; green fluorescent protein (GFP)-fusion protein localizes to both the cytoplasm and the nucleus	362.252	-0.105977	0.0584988	0.25225
YMR217W	GUA1	13	701790	703367	W	GMP synthase (glutamine-hydrolyzing)	GMP synthase; highly conserved enzyme that catalyzes the second step in the biosynthesis of GMP from inosine 5'-phosphate (IMP); transcription is not subject to regulation by guanine but is negatively regulated by nutrient starvation; reduction-of-function mutation gua1-G388D causes changes in cellular guanine nucleotide pools, defects in general protein synthesis, and impaired translation of GCN…	38324.6	-0.10597	8.24811e-05	0.0023155
YLR375W	STP3	12	871697	872728	W		Zinc-finger protein of unknown function; possibly involved in pre-tRNA splicing and in uptake of branched-chain amino acids; STP3 has a paralog, STP4, that arose from the whole genome duplication	4825.72	-0.105895	0.0402303	0.205235
YBL055C	YBL055C	2	115573	116829	C	3'-5'-exodeoxyribonuclease|Tat-D	3'-->5' exonuclease and endonuclease with a possible role in apoptosis; has similarity to mammalian and C. elegans apoptotic nucleases	3047.65	-0.105854	0.00387669	0.0419419
YMR194W	RPL36A	13	651145	651910	W	eL36|ribosomal 60S subunit protein L36A|L36e|YL39|L39|L36A|RPL39B	Ribosomal 60S subunit protein L36A; N-terminally acetylated; binds to 5.8 S rRNA; homologous to mammalian ribosomal protein L36, no bacterial homolog; RPL36A has a paralog, RPL36B, that arose from the whole genome duplication	10595.8	-0.105812	0.0178288	0.123323
YIL041W	GVP36	9	276525	277505	W		BAR domain protein that localizes to early and late Golgi vesicles; required for adaptation to varying nutrient concentrations, fluid-phase endocytosis, polarization of the actin cytoskeleton, and vacuole biogenesis	7566.07	-0.105783	0.00292487	0.0344226
YGL068W	MNP1	7	375087	375671	W	mitochondrial nucleoid protein MNP1	Mitochondrial ribosomal protein of the large subunit; has similarity to E. coli L7/L12 and human MRPL7 ribosomal proteins; associates with the mitochondrial nucleoid; required for normal respiratory growth	2869.23	-0.105056	0.0212318	0.137756
YBR088C	POL30	2	424990	425766	C	proliferating cell nuclear antigen|PCNA	Proliferating cell nuclear antigen (PCNA); functions as the sliding replication clamp for DNA polymerase delta; may function as a docking site for other proteins required for mitotic and meiotic chromosomal DNA replication and for DNA repair; PCNA ubiquitination at K164 plays a crucial role during Okazaki fragment processing	6634.65	-0.104995	0.00241788	0.0301188
YCR047C	BUD23	3	210718	211545	C	18S rRNA (guanine1575-N7)-methyltransferase	Methyltransferase that methylates residue G1575 of 18S rRNA; required for rRNA processing and nuclear export of 40S ribosomal subunits independently of methylation activity; diploid mutant displays random budding pattern; functional homolog of human WBSCR22	3167.44	-0.104984	0.000695702	0.0118852
YNL138W-A	YSF3	14	366033	366412	W	U2 snRNP complex subunit YSF3|RCP10	Component of the SF3b subcomplex of the U2 snRNP; essential protein required for splicing and for assembly of SF3b	322.635	-0.104922	0.066532	0.269898
YMR304C-A	YMR304C-A	13	878780	879130	C		Dubious open reading frame; unlikely to encode a functional protein, based on available experimental and comparative sequence data; partially overlaps 3' end of verified ORF SCW10/YMR305C	349.512	-0.104789	0.101123	0.345722
YBR181C	RPS6B	2	591712	592774	C	eS6|ribosomal 40S subunit protein S6B|S6e|RPS102|RPS101|LPG18	Protein component of the small (40S) ribosomal subunit; homologous to mammalian ribosomal protein S6, no bacterial homolog; phosphorylated on S233 by Ypk3p in a TORC1-dependent manner, and on S232 in a TORC1/2-dependent manner by Ypk1/2/3p; RPS6B has a paralog, RPS6A, that arose from the whole genome duplication	58518.7	-0.104589	0.0126072	0.0984459
YDR188W	CCT6	4	836421	838061	W	chaperonin-containing T-complex subunit CCT6|TCP20|TCP6|HTR3	Subunit of the cytosolic chaperonin Cct ring complex; related to Tcp1p, essential protein that is required for the assembly of actin and tubulins in vivo; contains an ATP-binding motif	18260.4	-0.104513	9.35751e-05	0.0025644
YHR034C	PIH1	8	176965	177999	C	NOP17	Component of the conserved R2TP complex (Rvb1-Rvb2-Tah1-Pih1); R2TP complex interacts with Hsp90 (Hsp82p and Hsc82p) to mediate assembly large protein complexes such as box C/D snoRNPs and RNA polymerase II	1165.05	-0.104164	0.010057	0.0842619
YHR050W	SMF2	8	207654	209303	W	divalent metal ion transporter SMF2	Divalent metal ion transporter involved in manganese homeostasis; has broad specificity for di-valent and tri-valent metals; post-translationally regulated by levels of metal ions; member of the Nramp family of metal transport proteins	3123.43	-0.104096	0.0011113	0.0166551
YJL050W	MTR4	10	342522	345743	W	ATP-dependent RNA helicase MTR4|DOB1	ATP-dependent 3'-5' RNA helicase of the DExD/H family; involved in nuclear RNA processing and degradation both as a component of TRAMP complex and in TRAMP-independent processes; TRAMP unwinds RNA duplexes, with Mtr4p unwinding activity stimulated by Pap2p/Air2p but not dependent on ongoing polyadenylation; contains an arch domain, with two coiled-coil arms/stalks and a globular fist/KOW domain, …	17444.2	-0.104084	0.000138002	0.00346813
YML063W	RPS1B	13	146482	147249	W	eS1|ribosomal 40S subunit protein S1B|S1e|rp10B|S1B|RP10B|PLC2	Ribosomal protein 10 (rp10) of the small (40S) subunit; homologous to mammalian ribosomal protein S3A, no bacterial homolog; RPS1B has a paralog, RPS1A, that arose from the whole genome duplication	111726	-0.104044	0.0053074	0.0523912
YOL128C	YGK3	15	78352	79479	C	serine/threonine protein kinase YGK3	Protein kinase related to mammalian GSK-3 glycogen synthase kinases; GSK-3 homologs (Mck1p, Rim11p, Mrk1p, Ygk3p) are involved in control of Msn2p-dependent transcription of stress responsive genes and in protein degradation; YGK3 has a paralog, MCK1, that arose from the whole genome duplication	1023.38	-0.103988	0.0316588	0.17502
YIL156W-B	YIL156W-B	9	47690	47973	W		Putative protein of unknown function; originally identified based on homology to <i>Ashbya gossypii</i> and other related yeasts; SWAT-GFP and mCherry fusion proteins localize to the vacuole, while SWAT-GFP fusion also localizes to the endoplasmic reticulum	227.763	-0.103751	0.106327	0.354115
YKL078W	DHR2	11	288845	291052	W	RNA helicase	Predominantly nucleolar DEAH-box ATP-dependent RNA helicase; required for 18S rRNA synthesis	3368.62	-0.103749	0.00280338	0.0334719
YML058W	SML1	13	159383	159697	W	ribonucleotide reductase inhibiting protein SML1	Ribonucleotide reductase inhibitor; involved in regulating dNTP production; regulated by Mec1p and Rad53p during DNA damage and S phase; SML1 has a paralog, DIF1, that arose from the whole genome duplication	5639.06	-0.10362	0.0146987	0.109009
YPL256C	CLN2	16	64977	66614	C	cyclin CLN2	G1 cyclin involved in regulation of the cell cycle; activates Cdc28p kinase to promote the G1 to S phase transition; late G1 specific expression depends on transcription factor complexes, MBF (Swi6p-Mbp1p) and SBF (Swi6p-Swi4p); CLN2 has a paralog, CLN1, that arose from the whole genome duplication; cell cycle arrest phenotype of the cln1 cln2 cln3 triple null mutant is complemented by any of hum…	5526.26	-0.103224	0.0075747	0.0681014
YER023W	PRO3	5	201076	201936	W	pyrroline-5-carboxylate reductase|ORE2	Delta 1-pyrroline-5-carboxylate reductase; catalyzes the last step in proline biosynthesis	10477.4	-0.103182	0.000109526	0.0028776
YOR246C	ENV9	15	795801	796793	C		Protein proposed to be involved in vacuolar functions; mutant shows defect in CPY processing and defects in vacuolar morphology; has similarity to oxidoreductases, found in lipid particles; required for replication of Brome mosaic virus in S. cerevisiae, a model system for studying replication of positive-strand RNA viruses in their natural hosts	5458.51	-0.103173	0.00313374	0.0360693
YLR030W	YLR030W	12	203290	204081	W		Putative protein of unknown function; S288C contains an in-frame stop codon between ORFs YLR030W and YLR031W	85.819	-0.103128	0.112787	0.366799
YDR111C	ALT2	4	678241	679764	C	alanine transaminase ALT2	Catalytically inactive alanine transaminase; expression is repressed in the presence of alanine and repression is mediated by Nrg1p; ALT2 has a paralog, ALT1, that arose from the whole genome duplication	2462.29	-0.10283	0.00105764	0.0163184
YNL220W	ADE12	14	234413	235714	W	adenylosuccinate synthase|BRA9	Adenylosuccinate synthase; catalyzes the first step in synthesis of adenosine monophosphate from inosine 5'monophosphate during purine nucleotide biosynthesis; exhibits binding to single-stranded autonomously replicating (ARS) core sequence	10423.9	-0.102802	0.00559021	0.0544359
YBL005W-A	NA	NA	NA	NA	NA	NA	NA	480.252	-0.102764	0.102252	0.347379
YKL181W	PRS1	11	107316	108599	W	ribose phosphate diphosphokinase subunit PRS1|PRP1	5-phospho-ribosyl-1(alpha)-pyrophosphate synthetase; synthesizes PRPP, which is required for nucleotide, histidine, and tryptophan biosynthesis; plays a key role in cell wall integrity (CWI) pathway; one of five related enzymes, which are active as heteromultimeric complexes; missense mutations in human homolog PRPS1 are associated with neuropathic Arts syndrome and Charcot-Marie Tooth (CMTX5) di…	18618.3	-0.102675	0.00213204	0.0273274
YAL036C	RBG1	1	75043	76152	C	GTP-binding protein RBG1|FUN11	Member of the DRG family of GTP-binding proteins; associates with translating ribosomes; interacts with Tma46p, Ygr250cp, Gir2p and Yap1p via two-hybrid	8527.9	-0.10262	0.000489021	0.00907844
YJR123W	RPS5	10	651901	652578	W	uS7|ribosomal 40S subunit protein S5|S7|rp14|YS8|S5|S2	Protein component of the small (40S) ribosomal subunit; least basic of non-acidic ribosomal proteins; phosphorylated in vivo; essential for viability; homologous to mammalian ribosomal protein S5 and bacterial S7	161870	-0.102439	0.0159607	0.115685
YER116C	SLX8	5	395348	396172	C	SUMO-targeted ubiquitin ligase complex subunit SLX8	Subunit of Slx5-Slx8 SUMO-targeted ubiquitin ligase (STUbL) complex; role in proteolysis of spindle positioning protein Kar9, DNA repair proteins Rad52p and Rad57p; stimulated by SUMO-modified substrates; contains a C-terminal RING domain; forms nuclear foci upon DNA replication stress; required for maintenance of genome integrity like human ortholog RNF	723.236	-0.102403	0.0306215	0.171737
YKR065C	PAM17	11	565299	565892	C	FMP18	Constituent of the TIM23 complex; proposed alternatively to be a component of the import motor (PAM complex) or to interact with and modulate the core TIM23 (Translocase of the Inner mitochondrial Membrane) complex; protein abundance increases in response to DNA replication stress	2545.82	-0.102359	0.0170722	0.120385
YJL136C	RPS21B	10	156550	157273	C	eS21|ribosomal 40S subunit protein S21B|S21e|YS25|S26B|S21B	Protein component of the small (40S) ribosomal subunit; homologous to mammalian ribosomal protein S21, no bacterial homolog; RPS21B has a paralog, RPS21A, that arose from the whole genome duplication	19736.8	-0.102232	0.0183455	0.125689
YEL030W	ECM10	5	94644	96578	W	Hsp70 family ATPase ECM10|SSC3	Heat shock protein of the Hsp70 family; localized in mitochondrial nucleoids, plays a role in protein translocation, interacts with Mge1p in an ATP-dependent manner; overexpression induces extensive mitochondrial DNA aggregations; ECM10 has a paralog, SSC1, that arose from the whole genome duplication	603.732	-0.102122	0.0326292	0.17918
YHR141C	RPL42B	8	381990	382751	C	eL42|ribosomal 60S subunit protein L42B|L44e|YP44|YL27|L42B|L41B|MAK18	Ribosomal 60S subunit protein L42B; required for propagation of the killer toxin-encoding M1 double-stranded RNA satellite of the L-A double-stranded RNA virus; homologous to mammalian ribosomal protein L36A, no bacterial homolog; RPL42B has a paralog, RPL42A, that arose from the whole genome duplication	27497.3	-0.101908	0.0235257	0.147324
YML078W	CPR3	13	111002	111550	W	peptidylprolyl isomerase CPR3|CYP3	Mitochondrial peptidyl-prolyl cis-trans isomerase (cyclophilin); catalyzes the cis-trans isomerization of peptide bonds N-terminal to proline residues; involved in protein refolding after import into mitochondria	5125.31	-0.101746	0.0227691	0.144952
YGR244C	LSC2	7	978036	979319	C	succinate--CoA ligase (GDP-forming) subunit beta	Beta subunit of succinyl-CoA ligase; succinyl-CoA ligase is a mitochondrial enzyme of the TCA cycle that catalyzes the nucleotide-dependent conversion of succinyl-CoA to succinate	5450.77	-0.101677	0.00131495	0.0190618
YCR020C	PET18	3	154012	154659	C	HIT2	Protein of unknown function; has weak similarity to proteins involved in thiamin metabolism; expression is induced in the absence of thiamin	215.833	-0.101372	0.102558	0.348213
YBL027W	RPL19B	2	168423	169376	W	eL19|ribosomal 60S subunit protein L19B|L19e|rpl5L|YL14|L23B|L19B	Ribosomal 60S subunit protein L19B; rpl19a and rpl19b single null mutations result in slow growth, while the double null mutation is lethal; homologous to mammalian ribosomal protein L19, no bacterial homolog; RPL19B has a paralog, RPL19A, that arose from the whole genome duplication	72551.1	-0.101278	0.0165219	0.117969
YOL082W	ATG19	15	168727	169974	W	CVT19	Receptor protein for the cytoplasm-to-vacuole targeting (Cvt) pathway; delivers cargo proteins aminopeptidase I (Ape1p) and alpha-mannosidase (Ams1p) to the phagophore assembly site for packaging into Cvt vesicles; interaction with Atg19p during the Cvt pathway requires phosphorylation by Hrr25p	1989.51	-0.101271	0.00649684	0.0610936
YLR333C	RPS25B	12	795573	795899	C	eS25|ribosomal 40S subunit protein S25B|S25e|rp45|YS23|S31B|S25B	Protein component of the small (40S) ribosomal subunit; homologous to mammalian ribosomal protein S25, no bacterial homolog; RPS25B has a paralog, RPS25A, that arose from the whole genome duplication	14609.3	-0.101179	0.0332523	0.180876
YMR230W	RPS10B	13	732414	733141	W	eS10|ribosomal 40S subunit protein S10B|S10e|S10B	Protein component of the small (40S) ribosomal subunit; homologous to mammalian ribosomal protein S10, no bacterial homolog; RPS10B has a paralog, RPS10A, that arose from the whole genome duplication; mutations in the human homolog associated with Diamond-Blackfan anemia	18605.2	-0.101037	0.024264	0.150799
YOL007C	CSI2	15	311342	312367	C		Protein of unknown function; green fluorescent protein (GFP)- fusion protein localizes to the mother side of the bud neck and the vacuole; YOL007C is not an essential gene	2628.04	-0.101028	0.0123107	0.0966547
YPL193W	RSA1	16	181403	182548	W		Protein involved in the assembly of 60S ribosomal subunits; functionally interacts with Dbp6p; functions in a late nucleoplasmic step of the assembly	2346.17	-0.100907	0.0100087	0.084211
YJL172W	CPS1	10	97737	99467	W	Gly-Xaa carboxypeptidase	Vacuolar carboxypeptidase S; expression is induced under low-nitrogen conditions	4050.83	-0.100544	0.0076089	0.0681014
YPR188C	MLC2	16	911988	912479	C		Regulatory light chain for the type II myosin Myo1p; binds to an IQ motif of Myo1p, localization to the bud neck depends on Myo1p; involved in the disassembly of the Myo1p ring	1390.85	-0.10049	0.0134004	0.102826
YGR192C	TDH3	7	882812	883810	C	glyceraldehyde-3-phosphate dehydrogenase (phosphorylating) TDH3|GAPDH|GPD|SSS2|HSP36|HSP35|GLD1	Glyceraldehyde-3-phosphate dehydrogenase (GAPDH), isozyme 3; involved in glycolysis and gluconeogenesis; tetramer that catalyzes the reaction of glyceraldehyde-3-phosphate to 1,3 bis-phosphoglycerate; detected in the cytoplasm and cell wall; GAPDH-derived antimicrobial peptides secreted by S. cerevisiae are active against a wide variety of wine-related yeasts and bacteria; binds AU-rich RNA	626777	-0.100422	0.00493502	0.0496903
YMR250W	GAD1	13	770801	772558	W	glutamate decarboxylase GAD1	Glutamate decarboxylase; converts glutamate into gamma-aminobutyric acid (GABA) during glutamate catabolism; involved in response to oxidative stress	2085.37	-0.100169	0.122239	0.382952
YMR241W	YHM2	13	751961	752905	W		Citrate and oxoglutarate carrier protein; exports citrate from and imports oxoglutarate into the mitochondrion, causing net export of NADPH reducing equivalents; also associates with mt nucleoids and has a role in replication and segregation of the mt genome	8926.81	-0.100161	0.00248304	0.0305994
YLR447C	VMA6	12	1026856	1027893	C	H(+)-transporting V0 sector ATPase subunit d	Subunit d of the V0 integral membrane domain of V-ATPase; part of the electrogenic proton pump found in the endomembrane system; required for V1 domain assembly on the vacuolar membrane; the V0 integral membrane domain of vacuolar H+-ATPase (V-ATPase) has five subunits	16514.1	-0.100112	0.00205821	0.0267382
YLR295C	ATP14	12	721999	722373	C	F1F0 ATP synthase subunit h	Subunit h of the F0 sector of mitochondrial F1F0 ATP synthase; F1F0 ATP synthase is a large, evolutionarily conserved enzyme complex required for ATP synthesis; protein abundance increases in response to DNA replication stress	1908.01	-0.0999575	0.0176962	0.122553
YGR037C	ACB1	7	559731	559994	C	long-chain fatty acid transporter ACB1	Acyl-CoA-binding protein; transports newly synthesized acyl-CoA esters from fatty acid synthetase (Fas1p-Fas2p) to acyl-CoA-consuming processes; subject to starvation-induced, Grh1p-mediated unconventional secretion; protein abundance increases in response to DNA replication stress	3592.73	-0.099838	0.034578	0.186326
YPL151C	PRP46	16	266180	267535	C	mRNA splicing protein PRP46|NTC50	Member of the NineTeen Complex (NTC); this complex contains Prp19p and stabilizes U6 snRNA in catalytic forms of the spliceosome containing U2, U5, and U6 snRNAs	1609.43	-0.0998369	0.00863964	0.0753351
YLR167W	RPS31	12	498947	499405	W	eS31|ubiquitin-ribosomal 40S subunit protein S31 fusion protein|S31e|UB13|YS24|S37|S31|UBI3|RPS37	Fusion protein cleaved to yield ribosomal protein S31 and ubiquitin; ubiquitin may facilitate assembly of the ribosomal protein into ribosomes; interacts genetically with translation factor eIF2B; homologous to mammalian ribosomal protein S27A, no bacterial homolog	119728	-0.0997977	0.0142166	0.106561
YJL134W	LCB3	10	158188	159417	W	sphinganine kinase LCB3|YSR2|LBP1	Long-chain base-1-phosphate phosphatase; specific for dihydrosphingosine-1-phosphate, regulates ceramide and long-chain base phosphates levels, involved in incorporation of exogenous long chain bases in sphingolipids; LCB3 has a paralog, YSR3, that arose from the whole genome duplication	3304.26	-0.0997859	0.00355128	0.0394549
YPR102C	RPL11A	16	731224	731748	C	uL5|ribosomal 60S subunit protein L11A|rp39A|YL22|L5|L16B|L11A	Ribosomal 60S subunit protein L11A; expressed at twice the level of Rpl11Bp; involved in ribosomal assembly; depletion causes degradation of 60S proteins and RNA; homologous to mammalian ribosomal protein L11 and bacterial L5; RPL11A has a paralog, RPL11B, that arose from the whole genome duplication	50222.9	-0.0994779	0.0348933	0.187149
YOR152C	ATG40	15	617518	618288	C		Autophagy receptor with a role in endoplasmic reticulum degradation; involved specifically in autophagy of cortical and cytoplasmic ER in response to nitrogen starvation or rapamycin treatment; localizes to the cortical and cytoplasmic ER; similar to human FAM134B, which is also involved in ER autophagy and is associated with sensory neuropathy	371.196	-0.0994398	0.0692099	0.276599
YML059C	NTE1	13	153219	158258	C	lysophospholipase	Serine esterase; homolog of human neuropathy target esterase (NTE); Nte1p-mediated phosphatidylcholine turnover influences transcription factor Opi1p localization, affecting transcriptional regulation of phospholipid biosynthesis genes	3750.32	-0.0993747	0.00689033	0.0637521
YDL229W	SSB1	4	44065	45906	W	Hsp70 family ATPase SSB1|YG101	Cytoplasmic ATPase that is a ribosome-associated molecular chaperone; functions with J-protein partner Zuo1p; may be involved in folding of newly-made polypeptide chains; member of the HSP70 family; interacts with phosphatase subunit Reg1p; SSB1 has a paralog, SSB2, that arose from the whole genome duplication	167137	-0.099345	0.00247974	0.0305994
YJL198W	PHO90	10	60844	63489	W	SPX domain-containing inorganic phosphate transporter	Low-affinity phosphate transporter; acts upstream of Pho81p in regulation of the PHO pathway; deletion of pho84, pho87, pho89, pho90, and pho91 causes synthetic lethality; transcription independent of Pi and Pho4p activity; overexpression results in vigorous growth; PHO90 has a paralog, PHO87, that arose from the whole genome duplication	7858.77	-0.0992967	0.00121812	0.0178834
YHR078W	YHR078W	8	256360	258018	W		High osmolarity-regulated gene of unknown function	3156.78	-0.0992788	0.00107588	0.0163831
YNL174W	YNL174W	14	308074	308646	W		Dubious open reading frame; unlikely to encode a functional protein, based on available experimental and comparative sequence data; overlaps the verified gene NOP13/YNL175C	7.88185	-0.0992695	0.000678046	0.0117182
YPR044C	OPI11	16	654524	654877	C		Dubious open reading frame; unlikely to encode a functional protein, based on available experimental and comparative sequence data; largely overlaps verified gene RPL43A/YPR043W; deletion confers sensitivity to GSAO	17.17	-0.0991346	0.00227545	0.0288948
YLR016C	PML1	12	176802	177416	C		Subunit of the RES complex; RES complex is required for nuclear retention of unspliced pre-mRNAs; acts in the same pathway as Pml39p and Mlp1p	990.677	-0.0990863	0.0456306	0.219568
YMR032W	HOF1	13	335298	337307	W	formin-binding protein HOF1|CYK2	Protein that regulates actin cytoskeleton organization; required for cytokinesis, actin cable organization, and secretory vesicle trafficking; localized to bud neck; phosphorylated by Dbf2p; regulates actomyosin ring dynamics and septin localization; contains an SH3 domain; N terminus controls cell size and levels of actin cables, while C terminus controls actin cable organization via direct regu…	2489.62	-0.0989235	0.00458171	0.0470852
YGR078C	PAC10	7	639772	640371	C	tubulin-binding prefolding complex subunit PAC10|RKS2|PFD3|GIM2	Part of the heteromeric co-chaperone GimC/prefoldin complex; complex promotes efficient protein folding	2063.8	-0.0975257	0.0100271	0.0842421
YKL060C	FBA1	11	326408	327487	C	fructose-bisphosphate aldolase FBA1|LOT1	Fructose 1,6-bisphosphate aldolase; required for glycolysis and gluconeogenesis; catalyzes conversion of fructose 1,6 bisphosphate to glyceraldehyde-3-P and dihydroxyacetone-P; locates to mitochondrial outer surface upon oxidative stress; N-terminally propionylated in vivo	520631	-0.0974925	0.0175448	0.122092
YGR181W	TIM13	7	858287	858604	W	protein translocase subunit TIM13	Mitochondrial intermembrane space protein; forms a complex with Tim8p that delivers a subset of hydrophobic proteins to the TIM22 complex for insertion into the inner membrane	593.917	-0.0973706	0.0602827	0.255248
YCR075W-A	EGO2	3	248975	249202	W		Component of the EGO and GSE complexes; identified by homology to Ashbya gossypii; YCR075W-A has a paralog, YNR034W-A, that arose from the whole genome duplication	196.421	-0.0970699	0.113362	0.368377
YML022W	APT1	13	228937	229500	W	adenine phosphoribosyltransferase APT1	Adenine phosphoribosyltransferase; catalyzes the formation of AMP from adenine and 5-phosphoribosylpyrophosphate; involved in the salvage pathway of purine nucleotide biosynthesis; APT1 has a paralog, APT2, that arose from the whole genome duplication	7835.68	-0.097054	0.0141471	0.106427
YPL086C	ELP3	16	384773	386446	C	Elongator subunit ELP3|KAT9|KTI8|TOT3|HPA1	Subunit of Elongator complex; Elongator is required for modification of wobble nucleosides in tRNA; exhibits histone acetyltransferase activity that is directed to histones H3 and H4; disruption confers resistance to K. lactis zymotoxin; human homolog ELP3 can partially complement yeast elp3 null mutant	7020.62	-0.0970423	0.00148694	0.02072
YNL112W	DBP2	14	413639	416281	W	DEAD-box ATP-dependent RNA helicase DBP2	ATP-dependent RNA helicase of the DEAD-box protein family; has strong preference for dsRNA; interacts with YRA1; required for assembly of Yra1p, Nab2p and Mex67p onto mRNA and formation of nuclear mRNP; involved in mRNA decay and rRNA processing; may be involved in suppression of transcription from cryptic initiation sites	35216.8	-0.0969885	0.0262092	0.156094
YLL045C	RPL8B	12	47859	48629	C	eL8|ribosomal 60S subunit protein L8B|L8e|rp6|YL5|L8B|L4B|SCL41|KRB1	Ribosomal 60S subunit protein L8B; required for processing of 27SA3 pre-rRNA to 27SB pre-rRNA during assembly of large ribosomal subunit; depletion leads to a turnover of pre-rRNA; L8 binds to Domain I of 25S and 5.8 S rRNAs; mutation results in decreased amounts of free 60S subunits; homologous to mammalian ribosomal protein L7A, no bacterial homolog; RPL8B has a paralog, RPL8A, that arose from …	102278	-0.0968027	0.00998448	0.0841299
YOL126C	MDH2	15	81787	82920	C	malate dehydrogenase MDH2	Cytoplasmic malate dehydrogenase; one of three isozymes that catalyze interconversion of malate and oxaloacetate; involved in the glyoxylate cycle and gluconeogenesis during growth on two-carbon compounds; interacts with Pck1p and Fbp1	9182.59	-0.0966123	0.0255888	0.155505
YIL083C	CAB2	9	203556	204653	C	phosphopantothenate--cysteine ligase CAB2	Subunit of the CoA-Synthesizing Protein Complex (CoA-SPC); subunits of this complex are: Cab2p, Cab3p, Cab4p, Cab5p, Sis2p and Vhs3p; probable phosphopantothenoylcysteine synthetase (PPCS), which catalyzes the second step of coenzyme A biosynthesis from pantothenate; null mutant lethality is complemented by human homolog PPCS and by E. coli coaBC (encoding a bifunctional enzyme with PPCS activity)	2527.81	-0.0965025	0.00268049	0.0322724
YER070W	RNR1	5	298950	301616	W	ribonucleotide-diphosphate reductase subunit RNR1|SDS12|RIR1|CRT7	Major isoform of large subunit of ribonucleotide-diphosphate reductase; the RNR complex catalyzes rate-limiting step in dNTP synthesis, regulated by DNA replication and DNA damage checkpoint pathways via localization of small subunits; relative distribution to the nucleus increases upon DNA replication stress; RNR1 has a paralog, RNR3, that arose from the whole genome duplication	17199.2	-0.0964928	0.0152683	0.112221
YPL277C	YPL277C	16	15405	16868	C		Putative protein of unknown function; localized to the membranes; gene expression regulated by copper levels	222.914	-0.0962368	0.11714	0.374071
YDR286C	YDR286C	4	1035231	1035575	C		Putative protein of unknown function; predicted to have thiol-disulfide oxidoreductase active site	356.283	-0.0962204	0.0807616	0.303773
YOR304C-A	BIL1	15	888520	888750	C	EDO1	Protein that binds Bud6p and has a role in actin cable assembly; involved in the Bnr1p-dependent pathway of cable assembly; localizes to bud tip and bud neck	256.523	-0.0962141	0.121107	0.381056
YJL138C	TIF2	10	153504	154691	C	translation initiation factor eIF4A|eIF4A	Translation initiation factor eIF4A; DEA(D/H)-box RNA helicase that couples ATPase activity to RNA binding and unwinding; forms a dumbbell structure of two compact domains connected by a linker; interacts with eIF4G; protein abundance increases in response to DNA replication stress; TIF2 has a paralog, TIF1, that arose from the whole genome duplication	53987.8	-0.0960367	0.00377852	0.0412626
YBL095W	MRX3	2	43277	44089	W		Protein that associates with mitochondrial ribosome; likely functions in cristae junction formation; the authentic, non-tagged protein is detected in highly purified mitochondria in high-throughput studies	781.531	-0.0959298	0.0428602	0.211908
YPR098C	YPR098C	16	728947	729528	C		Protein of unknown function; localized to the mitochondrial outer membrane	1259.62	-0.0959159	0.0150108	0.110753
YBR084C-A	RPL19A	2	414186	415261	C	eL19|ribosomal 60S subunit protein L19A|L19e|rpl5L|YL14|L23A|L19A	Ribosomal 60S subunit protein L19A; rpl19a and rpl19b single null mutations result in slow growth, while the double null mutation is lethal; homologous to mammalian ribosomal protein L19, no bacterial homolog; RPL19A has a paralog, RPL19B, that arose from the whole genome duplication	53447.7	-0.0958729	0.0167197	0.118792
YDL236W	PHO13	4	32296	33234	W	4-nitrophenylphosphatase	Conserved phosphatase acting as a metabolite repair enzyme; shows specific dephosphorylating activity on two side-products of central carbohydrate metabolism, 2-phosphoglycolate and 4-phosphoerythronate; alkaline phosphatase specific for p-nitrophenyl phosphate; also has protein phosphatase activity; human ortholog PGP shows similar substrate specificity, deletion causes similar metabolite accumu…	6826.95	-0.0958365	0.0132557	0.102398
YDR418W	RPL12B	4	1301616	1302113	W	uL11|ribosomal 60S subunit protein L12B|L11|YL23|L15B|L12B	Ribosomal 60S subunit protein L12B; rpl12a rpl12b double mutant exhibits slow growth and slow translation; homologous to mammalian ribosomal protein L12 and bacterial L11; RPL12B has a paralog, RPL12A, that arose from the whole genome duplication	51189.9	-0.0958359	0.0107443	0.0877902
YOR293W	RPS10A	15	867098	867852	W	eS10|ribosomal 40S subunit protein S10A|S10e|S10A	Protein component of the small (40S) ribosomal subunit; homologous to mammalian ribosomal protein S10, no bacterial homolog; RPS10A has a paralog, RPS10B, that arose from the whole genome duplication; mutations in the human homolog associated with Diamond-Blackfan anemia	34277.3	-0.0957422	0.02607	0.155992
YLR242C	ARV1	12	622918	623883	C	sterol homeostasis protein ARV1	Cortical ER protein; implicated in the membrane insertion of tail-anchored C-terminal single transmembrane domain proteins; may function in transport of glycosylphosphatidylinositol intermediates into the ER lumen; required for normal intracellular sterol distribution; human ARV1, required for normal cholesterol and bile acid homeostasis, can complement yeast arv1 null mutant; human variant causi…	929.259	-0.0955091	0.0352416	0.188141
YDR365W-B	NA	NA	NA	NA	NA	NA	NA	110260	-0.0954504	0.0141072	0.106402
YGR173W	RBG2	7	843854	844960	W	GIR1	Protein with a role in translation; forms a complex with Gir2p; has similarity to mammalian developmentally regulated GTP-binding protein	4769.71	-0.0954318	0.000959598	0.0150476
YEL027W	VMA3	5	100769	101251	W	H(+)-transporting V0 sector ATPase subunit c|CUP5|GEF2|CLS7	Proteolipid subunit c of the V0 domain of vacuolar H(+)-ATPase; dicyclohexylcarbodiimide binding subunit; required for vacuolar acidification and important for copper and iron metal ion homeostasis	25021.4	-0.0953763	0.0172365	0.120882
YBL071W-A	KTI11	2	89978	90226	W	DPH3	Zn-ribbon protein that co-purifies with Dph1 and Dph2; in a complex required for synthesis of diphthamide on translation factor eEF2 and with Elongator subunits Iki3p, Elp2p, and Elp3p; involved in modification of wobble nucleosides in tRNAs; forms a stable heterodimer with Ats1p	496.716	-0.0952738	0.0731557	0.286918
YHR008C	SOD2	8	122889	123590	C	superoxide dismutase SOD2	Mitochondrial manganese superoxide dismutase; protects cells against oxygen toxicity and oxidative stress; human mitochondrial SOD2 can complement a yeast null mutant and human cytoplasmic SOD1 can also complement when targeted to the mitochondrial matrix	5835.22	-0.0950932	0.0378709	0.197595
YDL075W	RPL31A	4	322226	322988	W	eL31|ribosomal 60S subunit protein L31A|L31e|YL28|L34A|L31A|RPL34	Ribosomal 60S subunit protein L31A; associates with karyopherin Sxm1p; loss of both Rpl31p and Rpl39p confers lethality; homologous to mammalian ribosomal protein L31, no bacterial homolog; RPL31A has a paralog, RPL31B, that arose from the whole genome duplication	37146.9	-0.094953	0.0259603	0.155992
YJR129C	EFM3	10	664000	665019	C	protein-lysine N-methyltransferase	S-adenosylmethionine-dependent methyltransferase; seven-beta-strand lysine methyltransferase which trimethylates translation elongation factor EF2 (Eft1p and Eft2p) at lysine 509; green fluorescent protein (GFP)-fusion protein localizes to the cytoplasm; ortholog of human gene FAM86A	841.698	-0.0949027	0.0222356	0.14266
YPL258C	THI21	16	53498	55153	C	bifunctional hydroxymethylpyrimidine kinase/phosphomethylpyrimidine kinase	Hydroxymethylpyrimidine (HMP) and HMP-phosphate kinase; involved in thiamine biosynthesis; member of a gene family with THI20 and THI22; functionally redundant with Thi20p	581.522	-0.0948509	0.0462832	0.221258
YNL301C	RPL18B	14	63570	64562	C	eL18|ribosomal 60S subunit protein L18B|L18e|rp28B|L18B|RP28B	Ribosomal 60S subunit protein L18B; homologous to mammalian ribosomal protein L18, no bacterial homolog; RPL18B has a paralog, RPL18A, that arose from the whole genome duplication	10203.3	-0.0948392	0.0347397	0.186561
YPR182W	SMX3	16	900194	900454	W	mRNA splicing protein SMX3|Sm F|SmF	Core Sm protein Sm F; part of heteroheptameric complex (with Smb1p, Smd1p, Smd2p, Smd3p, Sme1p, and Smx2p) that is part of the spliceosomal U1, U2, U4, and U5 snRNPs; homolog of human Sm F	313.578	-0.0948386	0.103542	0.349903
YER018C	SPC25	5	191959	192624	C	kinetochore-associated Ndc80 complex subunit SPC25	Component of the kinetochore-associated Ndc80 complex; involved in chromosome segregation, spindle checkpoint activity, and kinetochore clustering; evolutionarily conserved; other members include Ndc80p, Nuf2p, Spc24p, and Spc25p	551.62	-0.0947004	0.0697125	0.277836
YJL026W	RNR2	10	392404	393603	W	ribonucleotide-diphosphate reductase subunit RNR2|CRT6	Ribonucleotide-diphosphate reductase (RNR), small subunit; the RNR complex catalyzes the rate-limiting step in dNTP synthesis and is regulated by DNA replication and DNA damage checkpoint pathways via localization of the small subunits; RNR2 has a paralog, RNR4, that arose from the whole genome duplication	13354.6	-0.094549	0.00259142	0.0315299
YHR069C	RRP4	8	233579	234658	C	exosome non-catalytic core subunit RRP4	Exosome non-catalytic core component; involved in 3'-5' RNA processing and degradation in both the nucleus and the cytoplasm; predicted to contain RNA binding domains; has similarity to human hRrp4p (EXOSC2)	4107.48	-0.094526	0.0216276	0.139764
YER102W	RPS8B	5	363100	363702	W	eS8|ribosomal 40S subunit protein S8B|S8e|rp19|YS9|S8B|S14B	Protein component of the small (40S) ribosomal subunit; homologous to mammalian ribosomal protein S8, no bacterial homolog; RPS8B has a paralog, RPS8A, that arose from the whole genome duplication	69864.9	-0.0941458	0.062582	0.260231
YOL077W-A	ATP19	15	185438	185644	W	F1F0 ATP synthase subunit k	Subunit k of the mitochondrial F1F0 ATP synthase; F1F0 ATP synthase is a large, evolutionarily conserved enzyme complex required for ATP synthesis; associated only with the dimeric form of ATP synthase	464.156	-0.093989	0.0729528	0.286575
YHR072W-A	NOP10	8	241664	241840	W	snoRNP complex protein NOP10	Subunit of box H/ACA snoRNP complex; required for pseudouridylation and processing of pre-18S rRNA	1702.13	-0.0939771	0.106627	0.354703
YDR183C-A	YDR183C-A	4	830397	830654	C		Dubious open reading frame unlikely to encode a functional protein; identified by fungal homology and RT-PCR	110.111	-0.0939763	0.125406	0.388643
YGR085C	RPL11B	7	648383	648907	C	uL5|ribosomal 60S subunit protein L11B|rp39B|YL22|L5|L16A|L11B	Ribosomal 60S subunit protein L11B; expressed at half the level of Rpl11Ap; involved in ribosomal assembly; depletion causes degradation of 60S proteins and RNA; homologous to mammalian ribosomal protein L11 and bacterial L5; RPL11B has a paralog, RPL11A, that arose from the whole genome duplication	37716.5	-0.0939718	0.0257764	0.155618
YPL003W	ULA1	16	552020	553408	W	ENR2	Protein that activates Rub1p (NEDD8) before neddylation; acts together with Uba3p; may play a role in protein degradation	1183.52	-0.0939231	0.0289917	0.166017
YER104W	RTT105	5	366802	367428	W		Protein with a role in regulation of Ty1 transposition	335.38	-0.0939065	0.0983903	0.340021
YIL089W	YIL089W	9	195599	196216	W		Protein of unknown function found in the ER and vacuole lumen; overexpression of YIL089W affects endocytic protein trafficking	104.465	-0.0937072	0.149896	0.426211
YLR104W	LCL2	12	346585	346980	W		Putative protein of unknown function; mutant is deficient in cell wall mannosylphosphate and has long chronological lifespan; genetic interactions suggest a role in ER-associated protein degradation (ERAD); SWAT-GFP fusion protein localizes to the endoplasmic reticulum and vacuole, while mCherry fusion localizes to just the vacuole	1065.99	-0.0936999	0.0261831	0.156094
YGR031W	IMO32	7	546441	547469	W		Conserved mitochondrial protein of unknown function; processed by both mitochondrial processing peptidase and mitochondrial octapeptidyl aminopeptidase; gene contains the nested antisense gene NAG1	1543.99	-0.0936366	0.0182681	0.125457
YML028W	TSA1	13	220138	220728	W	thioredoxin peroxidase TSA1|cTPxI|TPX1|ZRG14	Thioredoxin peroxidase; acts as both ribosome-associated and free cytoplasmic antioxidant; self-associates to form high-molecular weight chaperone complex under oxidative stress; chaperone activity essential for growth in zinc deficiency; required for telomere length maintenance; binds and modulates Cdc19p activity; protein abundance increases, forms cytoplasmic foci during DNA replication stress…	52556.3	-0.093626	0.0311789	0.173003
YML102W	CAC2	13	68294	69700	W		Subunit of chromatin assembly factor I (CAF-1), with Rlf2p and Msi1p; chromatin assembly by CAF-1 is important for multiple processes including silencing at telomeres, mating type loci, and rDNA; maintenance of kinetochore structure, deactivation of the DNA damage checkpoint after DNA repair, chromatin dynamics during transcription; and repression of divergent transcription; relocalizes to the cy…	2023.36	-0.093555	0.00921573	0.0789234
YJR010C-A	SPC1	10	458077	458361	C	signal peptidase complex subunit SPC1	Subunit of the signal peptidase complex (SPC); SPC cleaves the signal sequence from proteins targeted to the endoplasmic reticulum (ER); homolog of the SPC12 subunit of mammalian signal peptidase complex; protein abundance increases in response to DNA replication stress	556.318	-0.0933791	0.064422	0.264631
YDR174W	HMO1	4	812110	812850	W	HSM2	Chromatin associated high mobility group (HMG) family member; involved in compacting, bending, bridging and looping DNA; rDNA-binding component that regulates transcription from RNA polymerase I promoters; regulates start site selection of ribosomal protein genes via RNA polymerase II promoters; role in genome maintenance; associates with a 5'-3' DNA helicase and Fpr1p, a prolyl isomerase; reloca…	7600.26	-0.0933426	0.0069847	0.064451
YPR010C	RPA135	16	577585	581196	C	DNA-directed RNA polymerase I core subunit RPA135|A135|SRP3|RRN2|RPA2	RNA polymerase I second largest subunit A135	31668.3	-0.0932376	0.00265377	0.0322111
YNL159C	ASI2	14	338478	339347	C		Subunit of the inner nuclear membrane Asi ubiquitin ligase complex; the Asi complex targets both misfolded proteins of the inner nuclear membrane-associated degradation (INMAD) pathway and inner for ubiquitin-mediated degradation; acts with Asi1p and Asi3p to ensure the fidelity of SPS-sensor signaling by targeting latent unprocessed forms of Stp1p and Stp2p, maintaining the repressed state of ge…	1019.84	-0.0931555	0.0298981	0.169187
YBR054W	YRO2	2	343101	344135	W		Protein with a putative role in response to acid stress; null mutant is sensitive to acetic acid; transcription is regulated by Haa1p and induced in the presence of acetic acid; protein observed in plasma membrane foci in the presence of acetic acid; the authentic, non-tagged protein is detected in a phosphorylated state in highly purified mitochondria in high-throughput studies	5756.53	-0.0930805	0.136596	0.408581
YPL048W	CAM1	16	464401	465648	W	translation elongation factor EF1B gamma|CPBP|TEF3	One of two isoforms of the gamma subunit of eEF1B; stimulates the release of GDP from eEF1A (Tef1p/Tef2p) post association with the ribosomal complex with eEF1Balpha subunit; nuclear protein required for transcription of MXR1; binds the MXR1 promoter in the presence of other nuclear factors; binds calcium and phospholipids	10885	-0.0930294	0.00200197	0.0261025
YNL208W	YNL208W	14	254418	255017	W		Protein of unknown function; may interact with ribosomes, based on co-purification experiments; authentic, non-tagged protein is detected in purified mitochondria in high-throughput studies; potential orthologs found in other fungi	9440.27	-0.0930182	0.0166856	0.118697
YER057C	HMF1	5	270737	271126	C	putative isoleucine biosynthesis protein HMF1|HIG1	Member of the p14.5 protein family; functionally complements Mmf1p function when targeted to mitochondria; heat shock inducible; high-dosage growth inhibitor; forms a homotrimer in vitro; HMF1 has a paralog, MMF1, that arose from the whole genome duplication	3524.3	-0.0930151	0.0062644	0.0594189
YIL069C	RPS24B	9	231553	232369	C	eS24|ribosomal 40S subunit protein S24B|S24e|S24B|RPS24EB	Protein component of the small (40S) ribosomal subunit; homologous to mammalian ribosomal protein S24, no bacterial homolog; RPS24B has a paralog, RPS24A, that arose from the whole genome duplication	21347.6	-0.092955	0.00638451	0.0603331
YBL087C	RPL23A	2	59822	60739	C	uL14|ribosomal 60S subunit protein L23A|L14|YL32|L23A|L17aA	Ribosomal 60S subunit protein L23A; homologous to mammalian ribosomal protein L23 and bacterial L14; RPL23A has a paralog, RPL23B, that arose from the whole genome duplication	30300.8	-0.0928605	0.0230565	0.145813
YFL038C	YPT1	6	55366	55986	C	Rab family GTPase YPT1|YP2	Rab family GTPase; involved in the ER-to-Golgi step of the secretory pathway; complex formation with the Rab escort protein Mrs6p is required for prenylation of Ypt1p by type II protein geranylgeranyltransferase (Bet2p-Bet4p); binds to unspliced HAC1 mRNA; regulates the unfolded protein response (UPR) by promoting the decay of HAC1 RNA; localizes to the early Golgi, the transitional Golgi and ER …	11436.6	-0.0925619	0.0229356	0.145689
YGL076C	RPL7A	7	364335	365996	C	uL30|ribosomal 60S subunit protein L7A|YL8|L7A|L6A|L30|rp11	Ribosomal 60S subunit protein L7A; required for processing of 27SA3 pre-rRNA to 27SB pre-rRNA during assembly of large ribosomal subunit; depletion leads to a turnover of pre-rRNA; contains a conserved C-terminal Nucleic acid Binding Domain (NDB2); binds to Domain II of 25S and 5.8S rRNAs; homologous to mammalian ribosomal protein L7 and bacterial L30; RPL7A has a paralog, RPL7B, that arose from …	90355.7	-0.0924843	0.0200931	0.133221
YBL006C	LDB7	2	216587	217129	C	RSC14	Component of the RSC chromatin remodeling complex; interacts with Rsc3p, Rsc30p, Npl6p, and Htl1p to form a module important for a broad range of RSC functions	1848.64	-0.0924299	0.00929344	0.0794707
YDR064W	RPS13	4	579458	580452	W	uS15|ribosomal 40S subunit protein S13|YS15|S27a|S15|S13|RPS13C|RPS13B	Protein component of the small (40S) ribosomal subunit; homologous to mammalian ribosomal protein S13 and bacterial S15	67978.1	-0.0916555	0.020904	0.136552
YNL312W	RFA2	14	48287	49216	W	RPA32|RPA2|BUF1	Subunit of heterotrimeric Replication Protein A (RPA); RPA is a highly conserved single-stranded DNA binding protein involved in DNA replication, repair, and recombination; RPA protects against inappropriate telomere recombination, and upon telomere uncapping, prevents cell proliferation by a checkpoint-independent pathway; in concert with Sgs1p-Top2p-Rmi1p, stimulates DNA catenation/decatenation…	3545.33	-0.0916359	0.00698826	0.064451
YKR085C	MRPL20	11	599094	599681	C	mitochondrial 54S ribosomal protein YmL20|YmL20	Mitochondrial ribosomal protein of the large subunit	1677.47	-0.0915976	0.0391162	0.201264
YDR297W	SUR2	4	1056551	1057600	W	sphingosine hydroxylase|SYR2	Sphinganine C4-hydroxylase; catalyses the conversion of sphinganine to phytosphingosine in sphingolipid biosyntheis	6311.9	-0.0911635	0.00685907	0.0635652
YBR157C	ICS2	2	553543	554310	C		Protein of unknown function; null mutation does not confer any obvious defects in growth, spore germination, viability, or carbohydrate utilization	825.82	-0.0910928	0.0599486	0.255248
YML070W	DAK1	13	133475	135229	W	dihydroxyacetone kinase	Dihydroxyacetone kinase; required for detoxification of dihydroxyacetone (DHA); involved in stress adaptation	7920.13	-0.0910535	0.0140196	0.106022
YNL234W	YNL234W	14	210233	211513	W		Protein of unknown function with similarity to globins; has a functional heme-binding domain; mutant has aneuploidy tolerance; transcription induced by stress conditions; may be involved in glucose signaling or metabolism; regulated by Rgt1	1543.05	-0.0909181	0.0316197	0.174973
YMR085W	YMR085W	13	437491	438789	W		Putative protein of unknown function; YMR085W and adjacent ORF YMR084W are merged in related strains, and together are paralogous to glutamine-fructose-6-phosphate amidotransferase GFA1	147.713	-0.0908855	0.156158	0.433999
YIL004C	BET1	9	347946	348505	C	SLY12	Type II membrane protein required for vesicular transport; required for vesicular transport between the endoplasmic reticulum and Golgi complex; v-SNARE with similarity to synaptobrevins	981.815	-0.0908788	0.0535391	0.238823
YGR034W	RPL26B	7	555812	556672	W	uL24|ribosomal 60S subunit protein L26B|L24|YL33|L33B|L26B	Ribosomal 60S subunit protein L26B; binds to 5.8S rRNA; non-essential even when paralog is also deleted; deletion has minimal affections on ribosome biosynthesis; homologous to mammalian ribosomal protein L26 and bacterial L24; RPL26B has a paralog, RPL26A, that arose from the whole genome duplication	36369.3	-0.0906913	0.0281205	0.163468
YLR007W	NSE1	12	164392	165402	W	Smc5-Smc6 complex subunit NSE1	Component of the SMC5-SMC6 complex; this complex plays a key role in the removal of X-shaped DNA structures that arise between sister chromatids during DNA replication and repair	1643.53	-0.0902198	0.051321	0.232869
YGR245C	SDA1	7	979765	982068	C		Protein required for actin organization and passage through Start; highly conserved nuclear protein; required for actin cytoskeleton organization; plays a critical role in G1 events; binds Nap1p; involved in 60S ribosome biogenesis	14183.2	-0.0902049	0.00546075	0.0535376
YOR348C	PUT4	15	986899	988782	C	proline permease PUT4	Proline permease; required for high-affinity transport of proline; also transports the toxic proline analog azetidine-2-carboxylate (AzC); PUT4 transcription is repressed in ammonia-grown cells	57.5969	-0.0901917	0.151585	0.428394
YIL010W	DOT5	9	334882	335529	W	thioredoxin peroxidase DOT5	Nuclear thiol peroxidase; functions as an alkyl-hydroperoxide reductase during post-diauxic growth	1424.01	-0.0901169	0.0385664	0.199775
YKL201C	MNN4	11	63930	67466	C	YKL200C	Putative positive regulator of mannosylphosphate transferase Mnn6p; involved in mannosylphosphorylation of N-linked oligosaccharides; expression increases in late-logarithmic and stationary growth phases; coding sequence contains length polymorphisms in different strains; MNN4 has a paralog, YJR061W, that arose from the whole genome duplication	2166.76	-0.0898979	0.032702	0.179238
YJL142C	IRC9	10	147819	148211	C		Dubious open reading frame; unlikely to encode a functional protein, based on available experimental and comparative sequence data; partially overlaps verified gene YJL141C; null mutant displays increased levels of spontaneous Rad52p foci	161.355	-0.0898732	0.156179	0.433999
YML086C	ALO1	13	95791	97371	C	D-arabinono-1,4-lactone oxidase	D-Arabinono-1,4-lactone oxidase; catalyzes the final step in biosynthesis of dehydro-D-arabinono-1,4-lactone, which is protective against oxidative stress	4974.06	-0.0898325	0.0122326	0.0963287
YGR149W	GPC1	7	789031	790329	W		Glycerophosphocholine acyltransferase (GPCAT); involved in in phosphatidylcholine (PC) synthesis; uses acetyl-CoA to acylate glycero-3-phosphocholine to yield lyso-PC; also catalyzes acylation of glycerophosphoethanolamine with acyl-CoA; predicted to be an integal membrane protein	1647.36	-0.0894557	0.0366946	0.193032
YBL005W-B	NA	NA	NA	NA	NA	NA	NA	15064	-0.0894018	0.0228938	0.145584
YOR272W	YTM1	15	832813	834195	W	CST14	Constituent of 66S pre-ribosomal particles; forms a complex with Nop7p and Erb1p that is required for maturation of the large ribosomal subunit; has seven C-terminal WD repeats	9089.25	-0.0893934	0.0169675	0.119813
YCR004C	YCP4	3	119575	120318	C	flavodoxin-like fold family protein	Protein of unknown function; has sequence and structural similarity to flavodoxins; predicted to be palmitoylated; the authentic, non-tagged protein is detected in highly purified mitochondria in high-throughput studies	6395.88	-0.0893934	0.00379818	0.0413946
YGL008C	PMA1	7	479910	482666	C	H(+)-exporting P2-type ATPase PMA1|KTI10	Plasma membrane P2-type H+-ATPase; pumps protons out of cell; major regulator of cytoplasmic pH and plasma membrane potential; long-lived protein asymmetrically distributed at plasma membrane between mother cells and buds; accumulates at high levels in mother cells during aging, buds emerge with very low levels of Pma1p, newborn cells have low levels of Pma1p; Hsp30p plays a role in Pma1p regulat…	275854	-0.089378	0.0109553	0.0885505
YKL069W	YKL069W	11	307285	307827	W	L-methionine (R)-S-oxide reductase|fRMsr|YKG9	Methionine-R-sulfoxide reductase; reduces the R enantiomer of free Met-SO, in contrast to Ycl033Cp which reduces Met-R-SO in a peptide linkage; has a role in protection against oxidative stress; relative distribution to the nucleus increases upon DNA replication stress	1700.41	-0.0891396	0.0478754	0.225469
YPL249C-A	RPL36B	16	75699	76239	C	eL36|ribosomal 60S subunit protein L36B|L36e|YL39|L39|L36B	Ribosomal 60S subunit protein L36B; binds to 5.8 S rRNA; homologous to mammalian ribosomal protein L36, no bacterial homolog; RPL36B has a paralog, RPL36A, that arose from the whole genome duplication	30120.3	-0.0890911	0.00440472	0.0460057
YDR503C	LPP1	4	1455042	1455866	C	phosphatidate phosphatase LPP1	Lipid phosphate phosphatase; catalyzes Mg(2+)-independent dephosphorylation of phosphatidic acid (PA), lysophosphatidic acid, and diacylglycerol pyrophosphate; involved in control of the cellular levels of phosphatidylinositol and PA	858.954	-0.0888977	0.0586951	0.252648
YDR094W	YDR094W	4	635840	636175	W		Dubious open reading frame; unlikely to encode a functional protein, based on available experimental and comparative sequence data; partially overlaps verified ORF DNF2/YDR093W	130.476	-0.0888717	0.172332	0.460647
YBR009C	HHF1	2	255373	255684	C	histone H4	Histone H4; core histone protein required for chromatin assembly and chromosome function; one of two identical histone proteins (see also HHF2); contributes to telomeric silencing; N-terminal domain involved in maintaining genomic integrity	14239.1	-0.0888459	0.0633142	0.261577
YDR528W	HLR1	4	1494586	1495857	W		Protein involved in regulation of cell wall composition and integrity; also involved in cell wall response to osmotic stress; overproduction suppresses a lysis sensitive PKC mutation; HLR1 has a paralog, LRE1, that arose from the whole genome duplication	1071.92	-0.0887456	0.0983902	0.340021
YCR046C	IMG1	3	209914	210423	C	mitochondrial 54S ribosomal protein IMG1	Mitochondrial ribosomal protein of the large subunit; required for respiration and for maintenance of the mitochondrial genome	1109.84	-0.0887382	0.0458309	0.220348
YHR007C	ERG11	8	120091	121683	C	sterol 14-demethylase|CYP51	Lanosterol 14-alpha-demethylase; catalyzes C-14 demethylation of lanosterol to form 4,4''-dimethyl cholesta-8,14,24-triene-3-beta-ol in ergosterol biosynthesis pathway; transcriptionally down-regulated when ergosterol is in excess; member of cytochrome P450 family; associated and coordinately regulated with the P450 reductase Ncp1p; human CYP51A1 functionally complements the lethality of the erg1…	32206.7	-0.0886284	0.0156027	0.113874
YLR300W	EXG1	12	728955	730301	W	glucan 1,3-beta-glucosidase|SCW6|BGL1	Major exo-1,3-beta-glucanase of the cell wall; involved in cell wall beta-glucan assembly; exists as three differentially glycosylated isoenzymes; EXG1 has a paralog, SPR1, that arose from the whole genome duplication	37586.5	-0.0884521	0.0126003	0.0984459
YDL063C	SYO1	4	338272	340134	C		Transport adaptor or symportin; facilitates synchronized nuclear coimport of the two 5S-rRNA binding proteins Rpl5p and Rpl11p; binds to nascent Rpl5p during translation; required for biogenesis of the large ribosomal subunit; green fluorescent protein (GFP)-fusion protein localizes to the cytoplasm and nucleus	7708.59	-0.0884177	0.00572237	0.0553446
YDR336W	MRX8	4	1145092	1146036	W		Protein that associates with mitochondrial ribosome; sumoylated under stress conditions in a genome wide study; YDR336W is not an essential gene	968.472	-0.0884171	0.0811372	0.304198
YKL019W	RAM2	11	402568	403518	W	bifunctional protein farnesyltransferase/protein geranylgeranyltransferase	Alpha subunit of farnesyltransferase and geranylgeranyltransferase-I; farnesyltransferase (Ram2p-Ram1p heterodimer) catalyzes the addition of 15-carbon isoprenoid farnesyl to substrate proteins containing a CAAX consensus motif; type I geranylgeranyltransferase (Ram2p-Cdc43p heterodimer) catalyzes the addition of the 20-carbon isoprenoid geranylgeranyl to substrate proteins containing a CaaL cons…	2947.27	-0.088348	0.0164044	0.117812
YBR197C	YBR197C	2	615203	615856	C		Protein of unknown function; green fluorescent protein (GFP)-fusion protein localizes to the cytoplasm and nucleus; YBR197C is not an essential gene; relative distribution to the nucleus increases upon DNA replication stress; YBR197C has a paralog, YPL077C, that arose from the whole genome duplication	886.9	-0.0881429	0.11742	0.374377
YLR406C	RPL31B	12	931065	931755	C	eL31|ribosomal 60S subunit protein L31B|L31e|YL28|L34B|L31B	Ribosomal 60S subunit protein L31B; associates with karyopherin Sxm1p; loss of both Rpl31p and Rpl39p confers lethality; homologous to mammalian ribosomal protein L31, no bacterial homolog; RPL31B has a paralog, RPL31A, that arose from the whole genome duplication	12761.5	-0.088118	0.0245888	0.151508
YPR094W	RDS3	16	720637	720960	W	U2 snRNP complex subunit RDS3	Component of the SF3b subcomplex of the U2 snRNP; zinc cluster protein involved in pre-mRNA splicing and cycloheximide resistance	355.82	-0.0880619	0.137623	0.41052
YOR297C	TIM18	15	874743	875321	C		Component of the mitochondrial TIM22 complex; involved in insertion of polytopic proteins into the inner membrane; may mediate assembly or stability of the complex	893.158	-0.0879981	0.0434304	0.213195
YER169W	RPH1	5	523369	525759	W	KDM4	JmjC domain-containing histone demethylase; targets tri- and dimethylated H3K36; associates with actively transcribed regions and promotes elongation; repressor of autophagy-related genes in nutrient-replete conditions; damage-responsive repressor of PHR1; phosphorylated by the Rad53p-dependent DNA damage checkpoint pathway and by a Rim1p-mediated event during starvation; target of stress-induced…	4115.65	-0.0879645	0.0328839	0.179742
YGR068C	ART5	7	625324	627084	C		Protein proposed to regulate endocytosis of plasma membrane proteins; regulates by recruiting the ubiquitin ligase Rsp5p to its target in the plasma membrane; SWAT-GFP and mCherry fusion proteins localize to the cytosol	1398.54	-0.0879021	0.0257198	0.155618
YPL267W	ACM1	16	38169	38798	W		Pseudosubstrate inhibitor of the APC/C; suppresses APC/C [Cdh1]-mediated proteolysis of mitotic cyclins; associates with Cdh1p, Bmh1p and Bmh2p; cell cycle regulated protein; the anaphase-promoting complex/cyclosome is also known as APC/C	791.624	-0.0878769	0.0600124	0.255248
YGL243W	TAD1	7	43307	44509	W	tRNA-specific adenosine deaminase	tRNA-specific adenosine deaminase; deaminates adenosine-37 to inosine in tRNA-Ala	1669.85	-0.0878191	0.0255671	0.155505
YDR450W	RPS18A	4	1359923	1360798	W	uS13|ribosomal 40S subunit protein S18A|S18A|S13	Protein component of the small (40S) ribosomal subunit; homologous to mammalian ribosomal protein S18 and bacterial S13; RPS18A has a paralog, RPS18B, that arose from the whole genome duplication; protein increases in abundance and relocalizes from cytoplasm to nuclear foci upon DNA replication stress	48770.7	-0.0877115	0.0649369	0.265987
YJR131W	MNS1	10	667644	669293	W	mannosyl-oligosaccharide 1,2-alpha-mannosidase	Alpha-1,2-mannosidase; involved in ER-associated protein degradation (ERAD); catalyzes the removal of one mannose residue from a glycosylated protein, converting the modification from Man9GlcNAc to Man8GlcNAc; catalyzes the last step in glycoprotein maturation in the ER and is critical for ER protein degradation	1384.87	-0.0875767	0.0460503	0.220829
YKL119C	VPH2	11	218570	219217	C	VMA12|CLS10	Integral membrane protein required for V-ATPase function; not an actual component of the vacuolar H+-ATPase (V-ATPase) complex; functions in the assembly of the V-ATPase; localized to the endoplasmic reticulum (ER); involved in methionine restriction extension of chronological lifespan in an autophagy-dependent manner	816.753	-0.0875353	0.0669252	0.270473
YEL042W	GDA1	5	73771	75327	W	guanosine diphosphatase	Guanosine diphosphatase located in the Golgi; involved in the transport of GDP-mannose into the Golgi lumen, converting GDP to GMP after mannose is transferred to substrates; null mutants are defective in sporulation and pre-meiotic S phase entry; orthologous to human ENTPD6, a meiosis-associated non-obstructive azoospermia (NOA) related gene identified in GWAS studies	9038.84	-0.0874587	0.00271042	0.0325647
YKR045C	YKR045C	11	523418	523969	C		Putative protein of unknown function; epitope-tagged protein localizes to the cytoplasm	291.272	-0.0872338	0.134224	0.403795
YML073C	RPL6A	13	123227	124172	C	eL6|ribosomal 60S subunit protein L6A|L6e|rp18|YL16|L6A|L17A|YL16A	Ribosomal 60S subunit protein L6A; N-terminally acetylated; binds 5.8S rRNA; homologous to mammalian ribosomal protein L6, no bacterial homolog; RPL6A has a paralog, RPL6B, that arose from the whole genome duplication	38643	-0.0869832	0.00749747	0.0675241
YDL238C	GUD1	4	28985	30454	C	guanine deaminase	Guanine deaminase; a catabolic enzyme of the guanine salvage pathway producing xanthine and ammonia from guanine; activity is low in exponentially-growing cultures but expression is increased in post-diauxic and stationary-phase cultures	464.072	-0.0869818	0.0961327	0.336442
YMR088C	VBA1	13	443414	445102	C		Permease of basic amino acids in the vacuolar membrane	4087.01	-0.0869793	0.0122224	0.0963287
YNL135C	FPR1	14	371882	372226	C	peptidylprolyl isomerase FPR1|RBP1|FKB1	Peptidyl-prolyl cis-trans isomerase (PPIase); binds to the drugs FK506 and rapamycin; also binds to the nonhistone chromatin binding protein Hmo1p and may regulate its assembly or function; N-terminally propionylated in vivo; mutation is functionally complemented by human FKBP1A	8600.43	-0.0868577	0.00391521	0.0420878
YHR041C	SRB2	8	189131	189864	C	MED20|HRS2	Subunit of the RNA polymerase II mediator complex; associates with core polymerase subunits to form the RNA polymerase II holoenzyme; general transcription factor involved in telomere maintenance	1281.06	-0.0867852	0.0329189	0.179742
YNR036C	MRPS12	14	694361	694822	C	putative mitochondrial 37S ribosomal protein MRPS12	Mitochondrial protein; may interact with ribosomes based on co-purification experiments; similar to E. coli and human mitochondrial S12 ribosomal proteins	2830.14	-0.0866	0.0436837	0.213775
YPL255W	BBP1	16	67725	68882	W		Protein required for the spindle pole body (SPB) duplication; localizes at the cytoplasmic side of the central plaque periphery of the SPB; forms a complex with a nuclear envelope protein Mps2p and SPB components Spc29p and Kar1p; required for mitotic functions of Cdc5p	1267.51	-0.0864299	0.0504994	0.230919
YPL183W-A	RTC6	16	199095	199376	W	putative mitochondrial 54S ribosomal protein RTC6|TAE4|GON5	Protein involved in translation; mutants have defects in biogenesis of nuclear ribosomes; sequence similar to prokaryotic ribosomal protein L36, may be a mitochondrial ribosomal protein; protein abundance increases in response to DNA replication stress	684.301	-0.0863133	0.0771037	0.296414
YBR233W-A	DAD3	2	684977	685261	W		Essential subunit of the Dam1 complex (aka DASH complex); complex couples kinetochores to the force produced by MT depolymerization thereby aiding in chromosome segregation; is transferred to the kinetochore prior to mitosis	439.906	-0.0862837	0.144118	0.418256
YBR291C	CTP1	2	783673	784572	C		Mitochondrial inner membrane citrate transporter; member of the mitochondrial carrier family	732.168	-0.0862203	0.0821557	0.306023
YBR127C	VMA2	2	491269	492822	C	H(+)-transporting V1 sector ATPase subunit B|ATPSV|VAT2	Subunit B of V1 peripheral membrane domain of vacuolar H+-ATPase; electrogenic proton pump found throughout the endomembrane system; contains nucleotide binding sites; also detected in the cytoplasm; protein abundance increases in response to DNA replication stress; human homolog ATP6V1B1, implicated in autosomal-recessive distal renal tubular acidosis (RTA) with sensorineural deafness, complemen…	30148.1	-0.0861754	0.00516499	0.0514265
YER147C-A	YER147C-A	5	465203	465613	C		Dubious open reading frame; unlikely to encode a functional protein, based on available experimental and comparative sequence data; overlaps ORF SPT15/YER148W	19.1541	-0.0861443	0.0116112	0.0928092
YBR107C	IML3	2	453793	454530	C	MCM19	Outer kinetochore protein and component of the Ctf19 complex; involved in the establishment of pericentromeric cohesion during mitosis; prevents non-disjunction of sister chromatids during meiosis II; forms a stable complex with Chl4p; required for localization of Sgo1p to pericentric sites during meiosis I; orthologous to human centromere constitutive-associated network (CCAN) subunit CENP-L and…	431.939	-0.0860343	0.116262	0.372734
YBR093C	PHO5	2	429548	430951	C	acid phosphatase PHO5|phoE	Repressible acid phosphatase; 1 of 3 repressible acid phosphatases that also mediates extracellular nucleotide-derived phosphate hydrolysis; secretory pathway derived cell surface glycoprotein; induced by phosphate starvation and coordinately regulated by PHO4 and PHO2	478.338	-0.0859419	0.134914	0.405659
YJR030C	RBH2	10	483959	486196	C	RBH2	Putative protein of unknown function; expression repressed in carbon limited vs carbon replete chemostat cultures; non-essential gene; contains a PH-like domain; RBH2 has a paralog, RBH1, that arose from the whole genome duplication	1575.03	-0.0859369	0.0194687	0.130407
YHR039C-A	VMA10	8	187173	187679	C	H(+)-transporting V1 sector ATPase subunit G|YHR039BC|YHR039C-B	Subunit G of the V1 peripheral membrane domain of V-ATPase; part of the electrogenic proton pump found throughout the endomembrane system; involved in vacuolar acidification; the V1 peripheral membrane domain of the vacuolar H+-ATPase (V-ATPase) has eight subunits	6690.14	-0.085814	0.0484182	0.226358
YOR122C	PFY1	15	552298	552887	C	profilin|CLS5|PRF1	Profilin; binds actin, phosphatidylinositol 4,5-bisphosphate, and polyproline regions; involved in cytoskeleton organization; required for normal timing of actin polymerization in response to thermal stress; protein abundance increases in response to DNA replication stress; highly conserved protein; human PFN1 (profilin 1) complements temperature sensitive pfy1 mutants, PFN1 mutations are a rare …	10944.6	-0.0857335	0.00869697	0.0757202
YBR118W	TEF2	2	477671	479047	W	translation elongation factor EF-1 alpha|eEF1A|EF-1 alpha	Translational elongation factor EF-1 alpha; in the GTP-bound active form, binds to and delivers aminoacylated tRNA to the A-site of ribosomes for elongation of nascent polypeptides; associates with vacuolar Rho1p GTPase; TEF2-RFP levels increase during replicative aging; may also have a role in tRNA re-export from the nucleus; TEF2 has a paralog, TEF1, that arose from the whole genome duplication	590779	-0.0857304	0.00359602	0.0398749
YNL069C	RPL16B	14	493956	495001	C	uL13|ribosomal 60S subunit protein L16B|L13|rp23|YL15|L21B|L16B|RP23	Ribosomal 60S subunit protein L16B; N-terminally acetylated, binds 5.8 S rRNA; transcriptionally regulated by Rap1p; homologous to mammalian ribosomal protein L13A and bacterial L13; RPL16B has a paralog, RPL16A, that arose from the whole genome duplication	69244.5	-0.0857254	0.00935907	0.0797947
YOR229W	WTM2	15	768409	769812	W	transcriptional modulator	Transcriptional modulator; involved in regulation of meiosis, silencing, and expression of RNR genes; involved in response to replication stress; contains WD repeats; relocalizes to the cytosol in response to hypoxia; WTM2 has a paralog, UME1, that arose from the whole genome duplication	1219.56	-0.0857254	0.027543	0.161251
YFR044C	DUG1	6	239992	241437	C	metallodipeptidase	Cys-Gly metallo-di-peptidase; forms a complex with Dug2p and Dug3p to degrade glutathione (GSH) and other peptides containing a gamma-glu-X bond in an alternative pathway to GSH degradation by gamma-glutamyl transpeptidase (Ecm38p); human homolog CNDP2 can complement yeast dug1 mutant	12843.7	-0.0853789	0.00364209	0.0402308
YGR105W	VMA21	7	698599	698832	W		Integral membrane protein required for V-ATPase function; not an actual component of the vacuolar H+-ATPase (V-ATPase) complex; diverged ortholog of human XMEA (X-linked Myopathy with Excessive Autophagy); functions in the assembly of the V-ATPase; localized to the yeast endoplasmic reticulum (ER)	920.69	-0.0852852	0.108117	0.357185
YNL180C	RHO5	14	299654	300649	C	Rho family GTPase RHO5|YNS0	Non-essential small GTPase of the Rho/Rac family of Ras-like proteins; RAC1 ortholog; regulated by phosphorylation and ubiquitination; likely involved in protein kinase C (Pkc1p)-dependent signal transduction pathway that controls cell integrity	4712.97	-0.0852766	0.01427	0.106793
YDL185W	VMA1	4	126787	130002	W	H(+)-transporting V1 sector ATPase subunit A|TFP1|CLS8	Subunit A of the V1 peripheral membrane domain of V-ATPase; protein precursor undergoes self-catalyzed splicing to yield the extein Tfp1p and the intein Vde (PI-SceI), which is a site-specific endonuclease; the V1 peripheral membrane domain of the vacuolar H+-ATPase (V-ATPase) has eight subunits; involved in methionine restriction extension of chronological lifespan in an autophagy-dependent mann…	35987.8	-0.0852705	0.0118205	0.0937012
YPL233W	NSL1	16	106172	106822	W	MIND complex subunit NSL1	Essential component of the MIND kinetochore complex; joins kinetochore subunits contacting DNA to those contacting microtubules; required for accurate chromosome segregation; complex consists of Mtw1p Including Nnf1p-Nsl1p-Dsn1p (MIND)	832.01	-0.0852704	0.0575848	0.249666
YHR200W	RPN10	8	499079	499885	W	proteasome regulatory particle base subunit RPN10|SUN1|MCB1	Non-ATPase base subunit of the 19S RP of the 26S proteasome; N-terminus plays a role in maintaining the structural integrity of the regulatory particle (RP); binds selectively to polyubiquitin chains; homolog of the mammalian S5a protein	5866.81	-0.0851863	0.0158679	0.115303
YDR101C	ARX1	4	655686	657467	C	putative hydrolase	Nuclear export factor for the ribosomal pre-60S subunit; shuttling factor which directly binds FG rich nucleoporins and facilities translocation through the nuclear pore complex; interacts directly with Alb1p; responsible for Tif6p recycling defects in the absence of Rei1; associated with the ribosomal export complex	13297.3	-0.0851701	0.00988035	0.0834731
YDL014W	NOP1	4	427364	428347	W	rRNA methyltransferase NOP1|LOT3	Histone glutamine methyltransferase, modifies H2A at Q105 in nucleolus; component of the small subunit processome complex, which is required for processing of pre-18S rRNA; ortholog of mammalian fibrillarin; inviability of the null mutant is functionally complemented by human FBL	22002.9	-0.0848242	0.0118943	0.0941562
YJR133W	XPT1	10	672991	673620	W	xanthine phosphoribosyltransferase	Xanthine-guanine phosphoribosyl transferase; required for xanthine utilization and for optimal utilization of guanine	2495.43	-0.0848126	0.0330291	0.179955
YDR179W-A	NVJ3	4	819433	820824	W		Protein with a potential role in tethering ER and vacuoles; localizes to nucleus-vacuole junctions in an Mdm1p-dependent manner; contains a lipid-binding PXA domain	1107.36	-0.0847947	0.0384212	0.199467
YIR035C	YIR035C	9	421026	421790	C	sepiapterin reductase family protein	Putative cytoplasmic short-chain dehydrogenase/reductase	3659.03	-0.0847421	0.0509103	0.231795
YJR047C	ANB1	10	524908	525381	C	translation elongation factor eIF-5A|eIF-5A|eIF5A|TIF51B|HYP1	Translation elongation factor eIF-5A; previously thought to function in translation initiation; undergoes an essential hypusination modification; expressed under anaerobic conditions; ANB1 has a paralog, HYP2, that arose from the whole genome duplication; human EIF5A complements the inviability of the yeast hyp2 anb1 double null mutant	165.225	-0.0847078	0.193333	0.489943
YLR288C	MEC3	12	713480	714904	C	PSO9|PIP3	DNA damage and meiotic pachytene checkpoint protein; subunit of a heterotrimeric complex (Rad17p-Mec3p-Ddc1p) that forms a sliding clamp, loaded onto partial duplex DNA by a clamp loader complex; homolog of human and S. pombe Hus1	1097.01	-0.0846994	0.0379709	0.197937
YIL102C-A	YIL102C-A	9	173365	173592	C		Putative protein of unknown function; identified based on comparisons of the genome sequences of six Saccharomyces species; SWAT-GFP, seamless-GFP and mCherry fusion proteins localize to the endoplasmic reticulum	82.7036	-0.0846809	0.191585	0.488079
YPL162C	YPL162C	16	243206	244027	C		Putative protein of unknown function; green fluorescent protein (GFP)-fusion protein localizes to the membrane of vacuole with cell cycle-correlated morphology	936.435	-0.0845072	0.0485896	0.226588
YAR071W	PHO11	1	225460	226863	W	acid phosphatase PHO11	One of three repressible acid phosphatases; glycoprotein that is transported to the cell surface by the secretory pathway; induced by phosphate starvation and coordinately regulated by PHO4 and PHO2; PHO11 has a paralog, PHO12, that arose from a segmental duplication	371.736	-0.0844347	0.184547	0.476477
YIL123W	SIM1	9	128151	129581	W	putative glucosidase SIM1	Protein of the SUN family (Sim1p, Uth1p, Nca3p, Sun4p); may participate in DNA replication; promoter contains SCB regulation box at -300 bp indicating that expression may be cell cycle-regulated; SIM1 has a paralog, SUN4, that arose from the whole genome duplication	7559.04	-0.0844145	0.0565055	0.247292
YHR143W-A	RPC10	8	387233	387445	W	DNA-directed RNA polymerase core subunit RPC10|ABC10-alpha|RPB12	RNA polymerase subunit ABC10-alpha, found in RNA pol I, II, and III; relocalizes from nucleolus to cytoplasm upon DNA replication stress	1838.94	-0.0844037	0.0674203	0.271711
YML126C	ERG13	13	19060	20535	C	hydroxymethylglutaryl-CoA synthase|HMGS	3-hydroxy-3-methylglutaryl-CoA (HMG-CoA) synthase; catalyzes the formation of HMG-CoA from acetyl-CoA and acetoacetyl-CoA; involved in the second step in mevalonate biosynthesis	16016.3	-0.0843754	0.00788041	0.0696647
YPR017C	DSS4	16	593486	593917	C	guanine nucleotide exchange factor DSS4	Guanine nucleotide dissociation stimulator for Sec4p; functions in the post-Golgi secretory pathway; binds zinc, found both on membranes and in the cytosol	437.817	-0.0842789	0.109035	0.359186
YMR299C	DYN3	13	864412	865350	C	dynein light intermediate chain	Dynein light intermediate chain (LIC); localizes with dynein, null mutant is defective in nuclear migration	1287.51	-0.0842372	0.0241646	0.150484
YGR262C	BUD32	7	1016974	1017759	C	serine/threonine protein kinase BUD32|LDB14	Protein kinase; component of the EKC/KEOPS complex with Kae1p, Cgi121p, Pcc1p, and Gon7p; Pyrococcus Bud32 ortholog functions as a P-loop ATPase rather than a protein kinase in the context of the complex; EKC/KEOPS complex is required for t6A tRNA modification and telomeric TG1-3 recombination; may have role in transcription; mutation is functionally complemented by human TP53RK	2071.27	-0.0842289	0.0430569	0.212151
YBR089C-A	NHP6B	2	426190	426489	C	high-mobility group nucleosome-binding protein|YBR090C-A	High-mobility group (HMG) protein; binds to and remodels nucleosomes; involved in recruiting FACT and other chromatin remodelling complexes to the chromosomes; functionally redundant with Nhp6Ap; required for transcriptional initiation fidelity of some tRNA genes; homologous to mammalian HMGB1 and HMGB2; NHP6B has a paralog, NHP6A, that arose from the whole genome duplication	2309.28	-0.0841496	0.0684533	0.27472
YIL059C	YIL059C	9	246550	246915	C		Dubious open reading frame; unlikely to encode a functional protein, based on available experimental and comparative sequence data; partially overlaps the uncharacterized ORF YIL060W	171.05	-0.0840541	0.182885	0.472823
YOR015W	YOR015W	15	359993	360352	W		Putative protein of unknown function; conserved among S. cerevisiae strains; YOR015W is not an essential gene	373.666	-0.0840414	0.120299	0.37977
YJR125C	ENT3	10	654737	655963	C		Protein containing an N-terminal epsin-like domain; involved in clathrin recruitment and traffic between the Golgi and endosomes; associates with the clathrin adaptor Gga2p	3749.28	-0.0839998	0.00741635	0.0671086
YNL282W	POP3	14	107687	108274	W		Subunit of both RNase MRP and nuclear RNase P; RNase MRP cleaves pre-rRNA, while nuclear RNase P cleaves tRNA precursors to generate mature 5' ends and facilitates turnover of nuclear RNAs; relocalizes to the cytosol in response to hypoxia	798.195	-0.0839877	0.103622	0.349967
YCR013C	YCR013C	3	138402	139049	C		Dubious open reading frame; unlikely to encode a functional protein, based on available experimental and comparative sequence data; transcription of both YCR013C and the overlapping essential gene PGK1 is reduced in a gcr1 null mutant	33.1008	-0.0838459	0.0260179	0.155992
YCL019W	NA	NA	NA	NA	NA	NA	NA	5996.64	-0.083804	0.0838596	0.308829
YIR029W	DAL2	9	410807	411838	W	allantoicase|ALC1	Allantoicase; converts allantoate to urea and ureidoglycolate in the second step of allantoin degradation; expression sensitive to nitrogen catabolite repression and induced by allophanate, an intermediate in allantoin degradation	355.591	-0.0837038	0.135125	0.405783
YOR095C	RKI1	15	503552	504328	C	ribose-5-phosphate isomerase RKI1	Ribose-5-phosphate ketol-isomerase; catalyzes the interconversion of ribose 5-phosphate and ribulose 5-phosphate in the pentose phosphate pathway; participates in pyridoxine biosynthesis	5229.04	-0.0835225	0.030989	0.172478
YJR097W	JJJ3	10	612413	612931	W	DPH4	Protein of unknown function; contains a CSL Zn finger and a DnaJ-domain; involved in diphthamide biosynthesis; ortholog human Dph4	784.123	-0.0831867	0.114982	0.371544
YBR139W	YBR139W	2	515664	517190	W	carboxypeptidase C	Putative serine type carboxypeptidase; role in phytochelatin synthesis; green fluorescent protein (GFP)-fusion protein localizes to the vacuole; expression induced by nitrogen limitation in a GLN3, GAT1-independent manner	4192.92	-0.083153	0.0611348	0.256822
YJR112W	NNF1	10	637030	637635	W	MIND complex subunit NNF1	Essential component of the MIND kinetochore complex; joins kinetochore subunits contacting DNA to those contacting microtubules; required for accurate chromosome segregation; complex consists of Mtw1p Including Nnf1p-Nsl1p-Dsn1p (MIND)	1077.05	-0.0830328	0.101284	0.345722
YOL124C	TRM11	15	85456	86757	C	tRNA (guanine-N2-)-methyltransferase	Catalytic subunit of adoMet-dependent tRNA methyltransferase complex; required for the methylation of the guanosine nucleotide at position 10 (m2G10) in tRNAs; contains a THUMP domain and a methyltransferase domain; another complex member is Trm112p	6990.25	-0.0828355	0.0336625	0.182246
YOL154W	ZPS1	15	34658	35407	W		Putative GPI-anchored protein; transcription is induced under low-zinc conditions, as mediated by the Zap1p transcription factor, and at alkaline pH	678.787	-0.0828112	0.156081	0.433999
YOL086W-A	MHF1	15	159173	159445	W		Component of the heterotetrameric MHF histone-fold complex; in humans the MHF complex interacts with both DNA and Mph1p ortholog FANCM, a Fanconi anemia complementation group protein, to stabilize and remodel blocked replication forks and repair damaged DNA; mhf1 srs2 double mutants are MMS hypersensitive; ortholog of human centromere constitutive-associated network (CCAN) subunit CENP-S, also kn…	361.293	-0.0827806	0.140093	0.413158
YIL113W	SDP1	9	150559	151188	W	mitogen-activated protein kinase tyrosine protein phosphatase SDP1	Stress-inducible dual-specificity MAP kinase phosphatase; negatively regulates Slt2p MAP kinase by direct dephosphorylation, diffuse localization under normal conditions shifts to punctate localization after heat shock; SDP1 has a paralog, MSG5, that arose from the whole genome duplication	73.6045	-0.0827626	0.19341	0.489943
YBR230W-A	YBR230W-A	2	680362	680562	W		Putative protein of unknown function; YBR230W-A has a paralog, COQ8, that arose from the whole genome duplication	104.847	-0.082589	0.204091	0.503252
YIL110W	HPM1	9	156045	157178	W	MNI1	AdoMet-dependent methyltransferase; involved in a novel 3-methylhistidine modification of ribosomal protein Rpl3p; seven beta-strand MTase family member; null mutant exhibits a weak vacuolar protein sorting defect and caspofungin resistance	3454.45	-0.0824655	0.024148	0.150484
YCL010C	SGF29	3	103571	104350	C		Component of the HAT/Core module of the SAGA, SLIK, and ADA complexes; HAT/Core module also contains Gcn5p, Ngg1p, and Ada2p; binds methylated histone H3K4; involved in transcriptional regulation through SAGA and TBP recruitment to target promoters and H3 acetylation	1565.75	-0.0824066	0.0352947	0.188249
YAL059W	ECM1	1	36509	37147	W		Pre-ribosomal factor involved in 60S ribosomal protein subunit export; associates with the pre-60S particle; shuttles between the nucleus and cytoplasm	3287.81	-0.0823432	0.0613835	0.256822
YDR343C	HXT6	4	1159608	1161320	C	hexose transporter HXT6	High-affinity glucose transporter; member of the major facilitator superfamily, nearly identical to Hxt7p, expressed at high basal levels relative to other HXTs, repression of expression by high glucose requires SNF3; HXT6 has a paralog, HXT1, that arose from the whole genome duplication	513.349	-0.0821662	0.204464	0.503252
YOR125C	CAT5	15	559030	559731	C	putative monooxygenase CAT5|COQ7	Protein required for ubiquinone (Coenzyme Q) biosynthesis; localizes to the matrix face of the mitochondrial inner membrane in a large complex with ubiquinone biosynthetic enzymes; required for gluconeogenic gene activation	1015.43	-0.0821002	0.0816364	0.305076
YBR092C	PHO3	2	427698	429101	C	acid phosphatase PHO3|phoC	Constitutively expressed acid phosphatase similar to Pho5p; brought to the cell surface by transport vesicles; hydrolyzes thiamin phosphates in the periplasmic space, increasing cellular thiamin uptake; expression is repressed by thiamin	18464.9	-0.0820886	0.0169382	0.119754
YGR177C	ATF2	7	848829	850436	C	alcohol O-acetyltransferase	Alcohol acetyltransferase; may play a role in steroid detoxification; forms volatile esters during fermentation, which is important for brewing and winemaking	1806.13	-0.0818708	0.0526784	0.235926
YLR395C	COX8	12	909729	909965	C	cytochrome c oxidase subunit VIII	Subunit VIII of cytochrome c oxidase (Complex IV); Complex IV is the terminal member of the mitochondrial inner membrane electron transport chain	1229.11	-0.0817779	0.115667	0.372088
YBR109C	CMD1	2	457919	458362	C	calmodulin|CaM	Calmodulin; Ca2+ binding protein that regulates Ca2+ independent processes (mitosis, bud growth, actin organization, endocytosis, etc.) and Ca2+ dependent processes (stress-activated pathways), targets include Nuf1p, Myo2p and calcineurin; binds to the Hog1p MAPK in response to hyperosmotic stress; potentiates membrane tubulation and constriction mediated by the Rvs161p-Rvs167p complex; human CAL…	6610.34	-0.0816089	0.013671	0.103932
YER186C	YER186C	5	561705	562625	C		Putative protein of unknown function	1762.57	-0.0815494	0.028167	0.163508
YGR137W	YGR137W	7	762888	763262	W		Dubious open reading frame; unlikely to encode a functional protein, based on available experimental and comparative sequence data	910.487	-0.0815218	0.143204	0.416865
YHR174W	ENO2	8	451327	452640	W	phosphopyruvate hydratase ENO2	Enolase II, a phosphopyruvate hydratase; catalyzes conversion of 2-phosphoglycerate to phosphoenolpyruvate during glycolysis and the reverse reaction during gluconeogenesis; expression induced in response to glucose; ENO2 has a paralog, ENO1, that arose from the whole genome duplication	387785	-0.0814203	0.0229624	0.145699
YDR156W	RPA14	4	769525	769938	W	DNA-directed RNA polymerase I subunit RPA14|A14	RNA polymerase I subunit A14	1293.05	-0.0812067	0.0873932	0.318621
YKR053C	YSR3	11	534067	535281	C	sphinganine kinase YSR3|LBP2	Dihydrosphingosine 1-phosphate phosphatase; membrane protein involved in sphingolipid metabolism; YSR3 has a paralog, LCB3, that arose from the whole genome duplication	270.489	-0.081182	0.164946	0.447766
YHR085W	IPI1	8	276764	277768	W		Component of the Rix1 complex and possibly pre-replicative complexes; required for processing of ITS2 sequences from 35S pre-rRNA; component of the pre-60S ribosomal particle with the dynein-related AAA-type ATPase Mdn1p; required for pre-replicative complex (pre-RC) formation and maintenance during DNA replication licensing; relocalizes to the cytosol in response to hypoxia; essential gene	2884.22	-0.0809931	0.0627479	0.260544
YCL038C	ATG22	3	54941	56527	C	AUT4	Vacuolar integral membrane protein required for efflux of amino acids; required for efflux of amino acids during autophagic body breakdown in the vacuole; null mutation causes a gradual loss of viability during starvation	1185.33	-0.080965	0.0951872	0.334229
YKR048C	NAP1	11	525387	526640	C	histone chaperone NAP1	Histone chaperone; involved in histone exchange by removing and replacing histone H2A-H2B dimers or histone variant dimers from assembled nucleosomes; involved in the transport of H2A and H2B histones to the nucleus; required for the regulation of microtubule dynamics during mitosis; interacts with mitotic cyclin Clb2p; controls bud morphogenesis; phosphorylated by CK2; protein abundance increase…	7803.03	-0.0809577	0.0350674	0.187558
YIL064W	EFM4	9	241943	242716	W	SEE1	Lysine methyltransferase; involved in the dimethylation of eEF1A (Tef1p/Tef2p) at lysine 316; sequence similarity to S-adenosylmethionine-dependent methyltransferases of the seven beta-strand family; role in vesicular transport	3139.31	-0.0809222	0.021023	0.137018
YNR027W	BUD17	14	674923	675876	W	putative pyridoxal kinase BUD17	Putative pyridoxal kinase; a key enzyme in vitamin B6 metabolism; involved in bud-site selection; diploid mutants display a random rather than a bipolar budding pattern; similarity to yeast BUD16 and human pyridoxal kinase (PDXK)	2037.88	-0.0805844	0.0451948	0.218018
YHR112C	YHR112C	8	334527	335663	C	putative cystathionine beta-lyase	Protein of unknown function; localizes to the cytoplasm and nucleus; overexpression affects protein trafficking through the endocytic pathway	1754.59	-0.0805675	0.0359353	0.190327
YMR191W	SPG5	13	645656	646777	W		Protein required for proteasome assembly during quiescence; binds to base of the proteasome regulartory particle; required for survival at high temperature during stationary phase; not required for growth on nonfermentable carbon sources	2365.46	-0.0804427	0.00878642	0.0762682
YNL022C	RCM1	14	591427	592899	C	rRNA (cytosine-C5-)-methyltransferase RCM1	rRNA m5C methyltransferase; methylates cytosine at position 2278 of 25S rRNA while Nop2p methylates cytosine at position 2870; contains seven beta-strand methyltransferase motif; localized to the nucleolus; interacts with Trm112p; homolog of NSUN5A, a human gene which is deleted in Williams-Beuren Syndrome	4440.38	-0.0802875	0.00659491	0.0616132
YPR085C	ASA1	16	708497	709828	C		Subunit of the ASTRA complex, involved in chromatin remodeling; telomere length regulator involved in the stability or biogenesis of PIKKs such as TORC1	1365.38	-0.0802587	0.0467128	0.222543
YCR010C	ADY2	3	132273	133124	C	ATO1	Acetate transporter required for normal sporulation; phosphorylated in mitochondria; ADY2 has a paralog, ATO2, that arose from the whole genome duplication	28.0654	-0.0802256	0.141575	0.41485
YDR497C	ITR1	4	1443713	1445467	C	myo-inositol transporter ITR1	Myo-inositol transporter; member of the sugar transporter superfamily; expression is repressed by inositol and choline via Opi1p and derepressed via Ino2p and Ino4p; relative distribution to the vacuole increases upon DNA replication stress; ITR1 has a paralog, ITR2, that arose from the whole genome duplication	53908.7	-0.0799085	0.0109069	0.0882831
YDL109C	YDL109C	4	265258	267201	C	putative lipase	Putative lipase; involved in lipid metabolism; not an essential gene; YDL109C has a paralog, ROG1, that arose from the whole genome duplication	780.108	-0.0798787	0.0902738	0.323166
YJR074W	MOG1	10	573095	573751	W	Ran GTPase-binding protein MOG1	Conserved nuclear protein that interacts with GTP-Gsp1p; stimulates nucleotide release from Gsp1p; involved in nuclear protein import; nucleotide release is inhibited by Yrb1p	3204.82	-0.0798284	0.0390079	0.201058
YOR224C	RPB8	15	760825	761265	C	DNA-directed RNA polymerase core subunit RPB8|ABC14.5	RNA polymerase subunit ABC14.5; common to RNA polymerases I, II, and III	7064.81	-0.0797495	0.0429933	0.212151
YML045W	NA	NA	NA	NA	NA	NA	NA	22465.3	-0.0797027	0.138508	0.412177
YGL191W	COX13	7	144808	145197	W	cytochrome c oxidase subunit VIa	Subunit VIa of cytochrome c oxidase; present in a subclass of cytochrome c oxidase complexes that may have a role in mimimizing generation of reactive oxygen species; not essential for cytochrome c oxidase activity but may modulate activity in response to ATP; required for assembly of Rcf2p into cytochrome c oxidase - cytochrome bc1 supercomplexes	2759.35	-0.0796743	0.0583866	0.252074
YBL028C	YBL028C	2	167518	167838	C		Protein of unknown function that may interact with ribosomes; green fluorescent protein (GFP)-fusion protein localizes to the nucleolus; predicted to be involved in ribosome biogenesis	2226.85	-0.0796306	0.0795109	0.301747
YLR301W	HRI1	12	730825	731559	W		Protein of unknown function that interacts with Sec72p and Hrr25p	8625.09	-0.07961	0.0481467	0.226055
YMR295C	YMR295C	13	858297	858890	C	IBI2	Protein of unknown function that associates with ribosomes; green fluorescent protein (GFP)-fusion protein localizes to the cell periphery and bud; not an essential gene; protein abundance increases in response to DNA replication stress; YMR295C has a paralog, YGR273C, that arose from the whole genome duplication	4544.82	-0.0796075	0.0609743	0.256821
YBR106W	PHO88	2	452658	453224	W	SND3	Protein involved in SRP-independent targeting of substrates to the ER; component of an alternative ER targeting pathway that has partial functional redundancy with the GET pathway; preference for substrates with downstream transmembrane domains; interacts with Snd1p, Env10p/Snd2p, and Sec61p-translocon subunits; can compensate for loss of SRP; role in phosphate transport, interacting with pho88, …	20435.6	-0.0794655	0.0574042	0.24957
YHR068W	DYS1	8	232133	233296	W	deoxyhypusine synthase	Deoxyhypusine synthase; catalyzes formation of deoxyhypusine, the first step in hypusine biosynthesis; triggers posttranslational hypusination of translation elongation factor eIF-5A and regulates its intracellular levels; tetrameric; human homolog DHPS allows growth of yeast haploid dys1 null mutant after sporulation of heterozygous diploid	14668.5	-0.0794398	0.00623444	0.0593044
YFR014C	CMK1	6	172537	173877	C	calmodulin-dependent protein kinase CMK1	Calmodulin-dependent protein kinase; may play a role in stress response, many Ca++/calmodulin dependent phosphorylation substrates demonstrated in vitro, amino acid sequence similar to mammalian Cam Kinase II; CMK1 has a paralog, CMK2, that arose from the whole genome duplication	1500.57	-0.0793537	0.0547899	0.24226
YPR088C	SRP54	16	711403	713028	C	RNA-binding signal recognition particle subunit SRP54|SRH1	Signal recognition particle (SRP) subunit (homolog of mammalian SRP54); contains the signal sequence-binding activity of SRP, interacts with the SRP RNA, and mediates binding of SRP to signal receptor; contains GTPase domain	10236.1	-0.0793511	0.00326391	0.0369652
YLR146C	SPE4	12	432823	433725	C	spermine synthase	Spermine synthase; required for the biosynthesis of spermine and also involved in biosynthesis of pantothenic acid	2058.56	-0.0793087	0.0587502	0.252696
YMR105C	PGM2	13	475897	477606	C	phosphoglucomutase PGM2|GAL5	Phosphoglucomutase; catalyzes the conversion from glucose-1-phosphate to glucose-6-phosphate, which is a key step in hexose metabolism; functions as the acceptor for a Glc-phosphotransferase; protein abundance increases in response to DNA replication stress; PGM2 has a paralog, PGM1, that arose from the whole genome duplication	2292.57	-0.0792733	0.221107	0.521226
YER019C-A	SBH2	5	194273	194539	C	Arf family guanine nucleotide exchange factor SBH2|SEB2	Ssh1p-Sss1p-Sbh2p complex component; involved in protein translocation into the endoplasmic reticulum; SBH2 has a paralog, SBH1, that arose from the whole genome duplication	2604.7	-0.0792055	0.0720896	0.284356
YGR032W	GSC2	7	548264	553951	W	1,3-beta-glucan synthase GSC2|FKS2	Catalytic subunit of 1,3-beta-glucan synthase; involved in formation of the inner layer of the spore wall; activity positively regulated by Rho1p and negatively by Smk1p; GSC2 has a paralog, FKS1, that arose from the whole genome duplication	2631.77	-0.0790411	0.0877007	0.318944
YNR030W	ALG12	14	678799	680454	W	dolichyl-P-Man:Man(7)GlcNAc(2)-PP-dolichol alpha-1,6-mannosyltransferase|ECM39	Alpha-1,6-mannosyltransferase localized to the ER; responsible for addition of alpha-1,6 mannose to dolichol-linked Man7GlcNAc2; acts in the dolichol pathway for N-glycosylation; human homolog ALG12 complements yeast null mutant	4427.18	-0.078924	0.00253416	0.0309825
YNL034W	YNL034W	14	570477	572315	W		Putative protein of unknown function; not an essential gene; YNL034W has a paralog, YNL018C, that arose from a segmental duplication	14.7933	-0.0788547	0.0608685	0.256629
YPL144W	POC4	16	280480	280926	W	DMP1|PBA4	Component of a heterodimeric Poc4p-Irc25p chaperone; involved in assembly of alpha subunits into the 20S proteasome; may regulate formation of proteasome isoforms with alternative subunits under different conditions; upregulates proteasome assembly in response to the unfolded protein response activated by mistargeting of proteins (UPRam)	555.527	-0.0788077	0.142102	0.415759
YDR368W	YPR1	4	1213904	1214842	W	trifunctional aldehyde reductase/carbonyl reductase (NADPH)/glucose 1-dehydrogenase (NADP(+)) YPR1	NADPH-dependent aldo-keto reductase; reduces multiple substrates including 2-methylbutyraldehyde and D,L-glyceraldehyde, expression is induced by osmotic and oxidative stress; functionally redundant with other aldo-keto reductases; protein abundance increases in response to DNA replication stress; YPR1 has a paralog, GCY1, that arose from the whole genome duplication; human homolog AKR1B1 can com…	4806.32	-0.0787434	0.0223817	0.143278
YDR364C	CDC40	4	1202843	1204210	C	SLU4|SLT15|PRP17	Pre-mRNA splicing factor; important for catalytic step II of pre-mRNA splicing and plays a role in cell cycle progression, particularly at the G1/S phase transition; required for DNA synthesis during mitosis and meiosis; has WD repeats; thermosensitivity of the cdc40 null mutant is functionally complemented by a chimeric construct containing the N-terminal 156 amino acids of yeast Cdc40p fused to…	2316.25	-0.0787317	0.0245191	0.151403
YPR160W	GPH1	16	861306	864014	W	glycogen phosphorylase	Glycogen phosphorylase required for the mobilization of glycogen; non-essential; regulated by cyclic AMP-mediated phosphorylation; phosphorylation by Cdc28p may coordinately regulate carbohydrate metabolism and the cell cycle; expression is regulated by stress-response elements and by the HOG MAP kinase pathway	2500.03	-0.0786192	0.224144	0.524911
YDL191W	RPL35A	4	117664	118517	W	uL29|ribosomal 60S subunit protein L35A|L35A|L29|SOS1	Ribosomal 60S subunit protein L35A; homologous to mammalian ribosomal protein L35 and bacterial L29; RPL35A has a paralog, RPL35B, that arose from the whole genome duplication	33177.6	-0.0785884	0.0726125	0.285532
YCR051W	YCR051W	3	214071	214739	W		Putative protein of unknown function; green fluorescent protein (GFP)-fusion protein localizes to the cytoplasm and nucleus; contains ankyrin (Ank) repeats; YCR051W is not an essential gene	4671.5	-0.078562	0.0244285	0.151167
YGL031C	RPL24A	7	437467	437934	C	eL24|ribosomal 60S subunit protein L24A|L24e|rp29|YL21|L30A|L24A|RPL30A	Ribosomal 60S subunit protein L24A; not essential for translation but may be required for normal translation rate; homologous to mammalian ribosomal protein L24, no bacterial homolog; RPL24A has a paralog, RPL24B, that arose from the whole genome duplication	48072.8	-0.0785607	0.0440236	0.21489
YBR141C	BMT2	2	527025	528038	C	25S rRNA (adenine2142-N1)-methyltransferase	Nucleolar S-adenosylmethionine-dependent rRNA methyltransferase; methylates adenine (m1A) of the large subunit (LSU) rRNA at position 2142; belongs to Rossmann fold superfamily; green fluorescent protein (GFP)-fusion protein localizes to the nucleolus; YBR141C is not an essential gene	1459.06	-0.0785216	0.0812494	0.304223
YJR067C	YAE1	10	567019	567444	C		Protein that forms a complex with Lto1p and Rli1p; essential for growth under standard (aerobic) conditions but not under anaerobic conditions; may have a role in protection of ribosomal assembly and function from damage due to reactive oxygen species	795.586	-0.0784694	0.076371	0.294779
YLR019W	PSR2	12	180288	181481	W	putative phosphatase	Plasma membrane phosphatase involved in the general stress response; required with Psr1p and Whi2p for full activation of STRE-mediated gene expression, possibly through dephosphorylation of Msn2p; PSR2 has a paralog, PSR1, that arose from the whole genome duplication	2589.3	-0.0784562	0.0210847	0.13711
YMR242C	RPL20A	13	753225	754220	C	eL20|ribosomal 60S subunit protein L20A|L20e|L20A|L18A|RPL18A2	Ribosomal 60S subunit protein L20A; homologous to mammalian ribosomal protein L18A, no bacterial homolog; RPL20A has a paralog, RPL20B, that arose from the whole genome duplication	55656.1	-0.0784283	0.0196934	0.131328
YLR149C	YLR149C	12	437631	439823	C		Protein of unknown function; overexpression causes a cell cycle delay or arrest; null mutation results in a decrease in plasma membrane electron transport; YLR149C is not an essential gene; protein abundance increases in response to DNA replication stress	342.791	-0.0784118	0.159825	0.440302
YDR224C	HTB1	4	914317	914712	C	histone H2B|SPT12	Histone H2B; core histone protein required for chromatin assembly and chromosome function; nearly identical to HTB2; Rad6p-Bre1p-Lge1p mediated ubiquitination regulates reassembly after DNA replication, transcriptional activation, meiotic DSB formation and H3 methylation	18878.1	-0.0783369	0.0207093	0.135904
YEL065W	SIT1	5	27657	29543	W	siderophore transporter|ARN3	Ferrioxamine B transporter; member of the ARN family of transporters that specifically recognize siderophore-iron chelates; transcription is induced during iron deprivation and diauxic shift; potentially phosphorylated by Cdc28p	1892.36	-0.078328	0.228919	0.530065
YIL160C	POT1	9	40191	41444	C	acetyl-CoA C-acyltransferase|POX3|FOX3	3-ketoacyl-CoA thiolase with broad chain length specificity; cleaves 3-ketoacyl-CoA into acyl-CoA and acetyl-CoA during beta-oxidation of fatty acids	18.8808	-0.0783256	0.111734	0.364735
YHR021C	RPS27B	8	147871	148669	C	eS27|ribosomal 40S subunit protein S27B|S27e|rp61|YS20|S27B	Protein component of the small (40S) ribosomal subunit; homologous to mammalian ribosomal protein S27, no bacterial homolog; RPS27B has a paralog, RPS27A, that arose from the whole genome duplication	19807.4	-0.0781692	0.140428	0.413593
YLR029C	RPL15A	12	201976	202590	C	eL15|ribosomal 60S subunit protein L15A|L15e|rp15R|YL10|L15A|L13A|RPL10A	Ribosomal 60S subunit protein L15A; binds to 5.8 S rRNA; homologous to mammalian ribosomal protein L15, no bacterial homolog; RPL15A has a paralog, RPL15B, that arose from the whole genome duplication	97628	-0.0780582	0.04324	0.212689
YDL037C	BSC1	4	384601	385587	C		Protein of unconfirmed function; similar to cell surface flocculin Flo11p; ORF exhibits genomic organization compatible with a translational readthrough-dependent mode of expression; in W303 strain one continuous open reading frame comprising of YDL037C, the intergenic region and YDL039C encodes the gene IMI1	2088.45	-0.0780478	0.187185	0.4805
YIL103W	DPH1	9	171751	173028	W	KIF48	Protein required for synthesis of diphthamide; required along with Dph2p, Kti11p, Jjj3p, and Dph5p; diphthamide is a modified histidine residue of translation elongation factor 2 (Eft1p or Eft2p); may act in a complex with Dph2p and Kti11p	3237.07	-0.0780012	0.0141234	0.106402
YJR072C	NPA3	10	570967	572124	C	GTPase NPA3|GPN1|EPA1	Member of the conserved GPN-loop GTPase family; has a role in transport of RNA polymerase II to the nucleus; exhibits GTP-dependent binding to PolII; has ATPase activity; involved in sister chromatid cohesion; phosphorylated by the Pcl1p-Pho85p kinase complex; human homolog XAB1 interacts with human RNA polymerase II; protein abundance increases in response to DNA replication stress	6902.06	-0.0779807	0.0241873	0.150484
YOR334W	MRS2	15	944596	946008	W		Mitochondrial inner membrane Mg(2+) channel; required for maintenance of intramitochondrial Mg(2+) concentrations at the correct level to support splicing of group II introns; similar to bacterial CorA	1119.87	-0.0779552	0.0486643	0.226588
YOR377W	ATF1	15	1046226	1047803	W	alcohol O-acetyltransferase	Alcohol acetyltransferase; responsible for the major part of volatile acetate ester production during fermentation; main enzyme involved in terpenyl acetate synthesis; potential roles in lipid and sterol metabolism	1948.62	-0.0779159	0.0186048	0.126679
YBR229C	ROT2	2	676357	679221	C	glucan 1,3-alpha-glucosidase ROT2|GLS2	Glucosidase II catalytic subunit; required to trim the final glucose in N-linked glycans; required for normal cell wall synthesis; mutations in rot2 suppress tor2 mutations, and are synthetically lethal with rot1 mutations	6631.57	-0.0778615	0.00227945	0.0288948
YNL062C	GCD10	14	508776	510212	C	tRNA 1-methyladenosine methyltransferase subunit GCD10|TRM6	Subunit of tRNA (1-methyladenosine) methyltransferase with Gcd14p; required for the modification of the adenine at position 58 in tRNAs, especially tRNAi-Met; first identified as a negative regulator of GCN4 expression	5590.15	-0.0778571	0.0188327	0.127244
YOL110W	SHR5	15	109176	109889	W	ERF4	Palmitoyltransferase subunit; this complex adds a palmitoyl lipid moiety to heterolipidated substrates such as Ras1p and Ras2p through a thioester linkage; palmitoylation is required for Ras2p membrane localization; Palmitoyltransferase is composed of Shr5p and Erf2	636.765	-0.0777686	0.140165	0.413158
YJL191W	RPS14B	10	73787	74611	W	uS11|ribosomal 40S subunit protein S14B|S11|rp59B|S14B|CRY2	Protein component of the small (40S) ribosomal subunit; required for ribosome assembly and 20S pre-rRNA processing; mutations confer cryptopleurine resistance; homologous to mammalian ribosomal protein S14 and bacterial S11; RPS14B has a paralog, RPS14A, that arose from the whole genome duplication	4583.79	-0.0777168	0.0268296	0.158331
YGL146C	RRT6	7	228751	229686	C		Putative protein of unknown function; non-essential gene identified in a screen for mutants with increased levels of rDNA transcription; contains two putative transmembrane spans, but no significant homology to other known proteins	130.473	-0.0774723	0.231794	0.533904
YHR210C	YHR210C	8	520712	521737	C	aldose 1-epimerase superfamily protein	Putative aldose 1-epimerase superfamily protein; non-essential gene; highly expressed under anaeorbic conditions	158.912	-0.0774517	0.221076	0.521226
YPL137C	GIP3	16	292817	296647	C	protein phosphatase regulator GIP3	Cytoplasmic protein that regulates protein phosphatase 1 Glc7p; overexpression relocalizes Glc7p from the nucleus and prevents chromosome segregation; may interact with ribosomes, based on co-purification experiments; GIP3 has a paralog, HER1, that arose from the whole genome duplication	5725.19	-0.0774479	0.0257677	0.155618
YHR199C	AIM46	8	497490	498422	C	FMP34	Protein of unknown function; the authentic, non-tagged protein is detected in highly purified mitochondria in high-throughput studies; null mutant displays elevated frequency of mitochondrial genome loss	2092.85	-0.0773991	0.0412225	0.207919
YBR252W	DUT1	2	722611	723054	W	bifunctional dITP/dUTP diphosphatase	Deoxyuridine triphosphate diphosphatase (dUTPase); catalyzes hydrolysis of dUTP to dUMP and PPi, thereby preventing incorporation of uracil into DNA during replication; critical for the maintenance of genetic stability; also has diphosphatase activity on deoxyinosine triphosphate; human homolog DUT allows growth of yeast haploid dut1 null mutant after sporulation of heterozygous diploid	2425.58	-0.077387	0.0598938	0.255248
YNL168C	FMP41	14	318030	318809	C		Putative protein of unknown function; GFP-fusion protein is induced in response to the DNA-damaging agent MMS; the authentic, non-tagged protein is detected in highly purified mitochondria in high-throughput studies	2424.76	-0.0773247	0.0277007	0.161845
YJL068C	YJL068C	10	313016	313915	C	S-formylglutathione hydrolase|SFGH	Esterase that can function as an S-formylglutathione hydrolase; non-essential intracellular esterase; may be involved in the detoxification of formaldehyde, which can be metabolized to S-formylglutathione; similar to human esterase D	3014.98	-0.0772745	0.0324723	0.17866
YJR139C	HOM6	10	689445	690524	C	homoserine dehydrogenase|THR6	Homoserine dehydrogenase (L-homoserine:NADP oxidoreductase); dimeric enzyme that catalyzes the third step in the common pathway for methionine and threonine biosynthesis; enzyme has nucleotide-binding, dimerization and catalytic regions	22026.3	-0.077262	0.0192982	0.129593
YMR214W	SCJ1	13	695350	696483	W		One of several homologs of bacterial chaperone DnaJ; located in the ER lumen where it cooperates with Kar2p to mediate maturation of proteins	3936.13	-0.0772017	0.0564905	0.247292
YBR078W	ECM33	2	393123	394742	W		GPI-anchored protein of unknown function; possible role in apical bud growth; GPI-anchoring on the plasma membrane crucial to function; phosphorylated in mitochondria; similar to Sps2p; ECM33 has a paralog, PST1, that arose from the whole genome duplication	60863.2	-0.0772011	0.00122667	0.017963
YGL062W	PYC1	7	385196	388732	W	pyruvate carboxylase 1	Pyruvate carboxylase isoform; cytoplasmic enzyme that converts pyruvate to oxaloacetate; differentially regulated than isoform Pyc2p; mutations in the human homolog are associated with lactic acidosis; PYC1 has a paralog, PYC2, that arose from the whole genome duplication	7230.14	-0.0771953	0.0142205	0.106561
YLR098C	CHA4	12	337527	339473	C	SIL3|SIL2	DNA binding transcriptional activator; mediates serine/threonine activation of the catabolic L-serine (L-threonine) deaminase (CHA1); Zinc-finger protein with Zn[2]-Cys[6] fungal-type binuclear cluster domain	1267.9	-0.0770705	0.0796247	0.301747
YGR214W	RPS0A	7	920575	921788	W	uS2|ribosomal 40S subunit protein S0A|S2|S0A|YST1|NAB1A|NAB1	Ribosomal 40S subunit protein S0A; required for maturation of 18S rRNA along with Rps0Bp; deletion of either RPS0 gene reduces growth rate, deletion of both genes is lethal; homologous to human ribosomal protein SA and bacterial S2; RPS0A has a paralog, RPS0B, that arose from the whole genome duplication;	71027.9	-0.0770003	0.0283101	0.163743
YNR035C	ARC35	14	693019	694047	C	END9	Subunit of the ARP2/3 complex; ARP2/3 is required for the motility and integrity of cortical actin patches; required for cortical localization of calmodulin	7664.05	-0.0769512	0.00449067	0.0463839
YLR407W	YLR407W	12	932967	933653	W		Putative protein of unknown function; null mutant displays elongated buds and a large fraction of budded cells have only one nucleus	2184.85	-0.0769364	0.117536	0.374541
YPL155C	KIP2	16	257216	259336	C		Kinesin-related motor protein involved in mitotic spindle positioning; stabilizes microtubules by targeting Bik1p to the plus end; functions as a microtubule polymerase and catastrophe inhibitor in vitro; Kip2p levels are controlled during the cell cycle	1803.3	-0.0769282	0.0387652	0.200444
YLR110C	CCW12	12	369697	370098	C		Cell wall mannoprotein; plays a role in maintenance of newly synthesized areas of cell wall; localizes to periphery of small buds, septum region of larger buds, and shmoo tip; CCW12 has a paralog, YDR134C, that arose from the whole genome duplication	110801	-0.0769279	0.0515057	0.232869
YPL103C	FMP30	16	358000	359406	C	N-acetylphosphatidylethanolamine-hydrolyzing phospholipase D	Protein with a role in maintaining mitochondrial morphology; also involved in maintaining normal cardiolipin levels; mitochondrial inner membrane protein; proposed to be involved in N-acylethanolamine metabolism; related to mammalian N-acylPE-specific phospholipase D	1450	-0.0769032	0.0392036	0.201264
YKR038C	KAE1	11	511999	513159	C	tRNA N6-adenosine threonylcarbamoyltransferase	Highly conserved ATPase of HSP70/DnaK family; essential functional component of the EKC/KEOPS complex, with Bud32p, Cgi121p, Pcc1p, and Gon7p; EKC/KEOPS complex is required for t6A tRNA modification and telomeric TG1-3 recombination; may have role in transcription	4008.53	-0.076792	0.00643811	0.0606405
YOR101W	RAS1	15	515244	516173	W	Ras family GTPase RAS1	GTPase involved in G-protein signaling in adenylate cyclase activation; plays a role in cell proliferation; localized to the plasma membrane; homolog of mammalian RAS proto-oncogenes; relative distribution to the nucleus increases upon DNA replication stress; RAS1 has a paralog, RAS2, that arose from the whole genome duplication	5058.19	-0.076742	0.0429667	0.212151
YDL082W	RPL13A	4	308424	309388	W	eL13|ribosomal 60S subunit protein L13A|L13e|L13A	Ribosomal 60S subunit protein L13A; not essential for viability; homologous to mammalian ribosomal protein L13, no bacterial homolog; RPL13A has a paralog, RPL13B, that arose from the whole genome duplication	31877.5	-0.0765838	0.0291144	0.166388
YBR021W	FUR4	2	281443	283344	W	uracil permease	Plasma membrane localized uracil permease; expression is tightly regulated by uracil levels and environmental cues; conformational alterations induced by unfolding or substrate binding result in Rsp5p-mediated ubiquitination and degradation	2085.99	-0.0763748	0.0793643	0.301679
YER056C	FCY2	5	266512	268113	C	purine-cytosine permease|BRA7	Purine-cytosine permease; mediates purine (adenine, guanine, and hypoxanthine) and cytosine accumulation; relative distribution to the vacuole increases upon DNA replication stress	27381.3	-0.0763146	0.0687336	0.275347
YFR051C	RET2	6	250163	251803	C	coatomer subunit delta	Delta subunit of the coatomer complex (COPI); COPI coats Golgi-derived transport vesicles; involved in retrograde transport between Golgi and ER	8723.76	-0.076296	0.0275743	0.16127
YLR214W	FRE1	12	568567	570627	W	ferric/cupric-chelate reductase	Ferric reductase and cupric reductase; reduces siderophore-bound iron and oxidized copper prior to uptake by transporters; expression induced by low copper and iron levels	2009.94	-0.0762287	0.135124	0.405783
YBR072W	HSP26	2	382030	382674	W	chaperone protein HSP26	Small heat shock protein (sHSP) with chaperone activity; forms hollow, sphere-shaped oligomers that suppress unfolded proteins aggregation; long-lived protein that is preferentially retained in mother cells and forms cytoplasmic foci; oligomer activation requires heat-induced conformational change; also has mRNA binding activity	773.318	-0.0761655	0.184941	0.477158
YLR010C	TEN1	12	167320	167802	C		Protein that regulates telomeric length; protects telomeric ends in a complex with Cdc13p and Stn1p; similar to human Ten1 which is critical for the telomeric function of the CST (Cdc13p-Stn1p-Ten1p) complex	195.101	-0.0760803	0.218867	0.519377
YOR230W	WTM1	15	770800	772113	W	transcriptional modulator	Transcriptional modulator; involved in regulation of meiosis, silencing, and expression of RNR genes; required for nuclear localization of the ribonucleotide reductase small subunit Rnr2p and Rnr4p; contains WD repeats	14792.2	-0.0760741	0.0747173	0.290648
YJL034W	KAR2	10	381327	383375	W	Hsp70 family ATPase KAR2|BIP|GRP78	ATPase involved in protein import into the ER; also acts as a chaperone to mediate protein folding in the ER and may play a role in ER export of soluble proteins; regulates the unfolded protein response via interaction with Ire1p	23870.4	-0.0760296	0.0668112	0.270393
YNL030W	HHF2	14	576727	577038	W	histone H4	Histone H4; core histone protein required for chromatin assembly and chromosome function; one of two identical histone proteins (see also HHF1); contributes to telomeric silencing; N-terminal domain involved in maintaining genomic integrity	18454.1	-0.0760163	0.0952528	0.334256
YJL159W	HSP150	10	120449	121690	W	heat shock protein HSP150|PIR2|ORE1|CCW7	O-mannosylated heat shock protein; secreted and covalently attached to the cell wall via beta-1,3-glucan and disulfide bridges; required for cell wall stability; induced by heat shock, oxidative stress, and nitrogen limitation; HSP150 has a paralog, PIR3, that arose from the whole genome duplication	46443.6	-0.0758785	0.0701951	0.27941
YLR150W	STM1	12	440467	441288	W	MPT4	Protein required for optimal translation under nutrient stress; perturbs association of Yef3p with ribosomes; involved in TOR signaling; binds G4 quadruplex and purine motif triplex nucleic acid; helps maintain telomere structure; protein abundance increases in response to DNA replication stress; serves as a ribosome preservation factor both during quiescence and recovery	77062.8	-0.0758505	0.0146061	0.108555
YER072W	VTC1	5	302806	303195	W	PHM4|NRF1	Regulatory subunit of the vacuolar transporter chaperone (VTC) complex; VTC complex is involved in membrane trafficking, vacuolar polyphosphate accumulation, microautophagy and non-autophagic vacuolar fusion; also has mRNA binding activity; protein abundance increases in response to DNA replication stress	3113.07	-0.075832	0.0426145	0.211419
YER150W	SPI1	5	468370	468816	W		GPI-anchored cell wall protein involved in weak acid resistance; basal expression requires Msn2p/Msn4p; expression is induced under conditions of stress and during the diauxic shift; SPI1 has a paralog, SED1, that arose from the whole genome duplication	992.691	-0.0757455	0.178451	0.467237
YKL130C	SHE2	11	195288	196028	C		RNA-binding protein that binds specific mRNAs and interacts with She3p; part of the mRNA localization machinery that restricts accumulation of certain proteins to the bud; binds to ER-derived membranes and targets mRNAs to cortical ER	1380.83	-0.0757262	0.076873	0.295923
YMR290C	HAS1	13	850074	851591	C	ATP-dependent RNA helicase HAS1	ATP-dependent RNA helicase; involved in the biogenesis of 40S and 60S ribosome subunits; localizes to both the nuclear periphery and nucleolus; highly enriched in nuclear pore complex fractions; constituent of 66S pre-ribosomal particles	12407.7	-0.0756273	0.044016	0.214891
YER109C	NA	NA	NA	NA	NA	NA	NA	2192.73	-0.0756223	0.107503	0.35614
YPL202C	AFT2	16	168088	169338	C		Iron-regulated transcriptional activator; activates genes involved in intracellular iron use and required for iron homeostasis and resistance to oxidative stress; AFT2 has a paralog, AFT1, that arose from the whole genome duplication	2140.61	-0.0756073	0.0307051	0.171737
YNL244C	SUI1	14	187170	187496	C	translation initiation factor eIF1|RFR1|MOF2	Translation initiation factor eIF1; component of a complex involved in recognition of the initiator codon; modulates translation accuracy at the initiation phase	7398.79	-0.0755367	0.0196615	0.131328
YHR104W	GRE3	8	323409	324392	W	trifunctional aldehyde reductase/xylose reductase/glucose 1-dehydrogenase (NADP(+))	Aldose reductase; involved in methylglyoxal, d-xylose, arabinose, and galactose metabolism; stress induced (osmotic, ionic, oxidative, heat shock, starvation and heavy metals); regulated by the HOG pathway; protein abundance increases in response to DNA replication stress	4473.49	-0.0754709	0.116451	0.372942
YBR235W	VHC1	2	686901	690263	W		Vacuolar membrane cation-chloride cotransporter (CCC); likely mediates K+ and Cl- cotransport into the vacuole; has a role in potassium homeostasis and salt tolerance; localizes to sites of contact between the vacuole and mitochondria (vCLAMPs); similar to mammalian electroneutral Na(+)-(K+)-C1- cotransporter family	3488.7	-0.0754381	0.0101649	0.0846581
YOR180C	DCI1	15	674352	675167	C	putative dodecenoyl-CoA isomerase DCI1|ECI2	Peroxisomal protein; identification as a delta(3,5)-delta(2,4)-dienoyl-CoA isomerase involved in fatty acid metabolism is disputed; DCI1 has a paralog, ECI1, that arose from the whole genome duplication	384.017	-0.0754271	0.154253	0.432885
YDR007W	TRP1	4	461842	462516	W	phosphoribosylanthranilate isomerase TRP1	Phosphoribosylanthranilate isomerase; catalyzes the third step in tryptophan biosynthesis; in 2004, the sequence of TRP1 from strain S228C was updated by changing the previously annotated internal STOP (TAA) to serine (TCA); enhances vegetative growth at low and high temperatures when used as an auxotrophic marker in strains such as W303	2227.3	-0.0753386	0.0463608	0.221416
YJL183W	MNN11	10	84068	85336	W	alpha-1,6-mannosyltransferase	Subunit of a Golgi mannosyltransferase complex; this complex also contains Anp1p, Mnn9p, Mnn10p, and Hoc1p, and mediates elongation of the polysaccharide mannan backbone; has homology to Mnn10p	6242.99	-0.0753258	0.0131634	0.101822
YER010C	YER010C	5	172634	173338	C	bifunctional 4-hydroxy-4-methyl-2-oxoglutarate aldolase/oxaloacetate decarboxylase	Bifunctional HMG aldolase/oxaloacetate decarboxylase; requires divalent metal ions for activity; competitively inhibited by oxalate; forms a ring-shaped homotrimer; similar to members of the prokaryotic RraA family of class II (divalent metal ion dependent) pyruvate aldolases from the meta cleavage pathways of protocatechuate and gallate	1702.67	-0.0753025	0.0307665	0.171737
YGR210C	YGR210C	7	913503	914738	C		Putative protein of unknown function; green fluorescent protein (GFP)-fusion protein localizes to the cytoplasm	5775.21	-0.0752571	0.0219341	0.140913
YML043C	RRN11	13	190244	191767	C		Component of the core factor (CF) rDNA transcription factor complex; CF is required for transcription of 35S rRNA genes by RNA polymerase I and is composed of Rrn6p, Rrn7p, and Rrn11p	3495.32	-0.075023	0.149557	0.425667
YEL016C	NPP2	5	124737	126218	C	nucleotide diphosphatase/phosphodiesterase NPP2	Nucleotide pyrophosphatase/phosphodiesterase; mediates extracellular nucleotide phosphate hydrolysis along with Npp1p and Pho5p; activity and expression enhanced during conditions of phosphate starvation; involved in spore wall assembly; SWAT-GFP and mCherry fusion proteins localize to the endoplasmic reticulum; NPP2 has a paralog, NPP1, that arose from the whole genome duplication; npp1 npp2 dou…	2124.53	-0.0749594	0.0433	0.212802
YOR021C	SFM1	15	372798	373439	C	protein-arginine N-methyltransferase SFM1	SPOUT methyltransferase; catalyzes omega-monomethylation of Rps3p on Arg-146; not an essential gene; predicted to be involved in rRNA processing and ribosome biogenesis and in biopolymer catabolism	4934.28	-0.074833	0.0675496	0.271852
YCR018C	SRD1	3	148238	148903	C		Protein involved in the processing of pre-rRNA to mature rRNA; contains a C2/C2 zinc finger motif; srd1 mutation suppresses defects caused by the rrp1-1 mutation	969.519	-0.0747588	0.145855	0.420327
YGL070C	RPB9	7	374459	374827	C	DNA-directed RNA polymerase II core subunit RPB9|B12.6|SSU73|SHI	RNA polymerase II subunit B12.6; contacts DNA; mutations affect transcription start site selection and fidelity of transcription	1193.44	-0.0747381	0.12593	0.38901
YHR148W	IMP3	8	393534	394085	W	snoRNA-binding rRNA-processing protein IMP3	Component of the SSU processome; SSU processome is required for pre-18S rRNA processing, essential protein that interacts with Mpp10p and mediates interactions of Imp4p and Mpp10p with U3 snoRNA	1774.14	-0.0747312	0.0441114	0.214954
YDL013W	SLX5	4	429067	430926	W	SUMO-targeted ubiquitin ligase complex subunit SLX5|ULS2|HEX3	Subunit of the Slx5-Slx8 SUMO-targeted Ub ligase (STUbL) complex; role in Ub-mediated degradation of histone variant Cse4p preventing mislocalization to euchromatin; role in proteolysis of spindle positioning protein Kar9p, and DNA repair proteins Rad52p and Rad57p; forms SUMO-dependent nuclear foci, including DNA repair centers; contains a RING domain and two SIM motifs; associates with the cent…	2297.4	-0.0746196	0.0344937	0.186046
YJL091C	GWT1	10	261080	262552	C	glucosaminyl-phosphotidylinositol O-acyltransferase	Protein involved in the inositol acylation of GlcN-PI; the inositol acylation of glucosaminyl phosphatidylinositol (GlcN-PI) forms glucosaminyl(acyl)phosphatidylinositol (GlcN(acyl)PI), an intermediate in the biosynthesis of glycosylphosphatidylinositol (GPI) anchors	2680.06	-0.074546	0.0231552	0.146111
YOR310C	NOP58	15	896825	898360	C	RNA-processing protein NOP58|NOP5	Protein involved in producing mature rRNAs and snoRNAs; involved in pre-rRNA processing, 18S rRNA synthesis, and snoRNA synthesis; component of the small subunit processome complex, which is required for processing of pre-18S rRNA	23163.9	-0.0745072	0.0134456	0.102975
YDR459C	PFA5	4	1382319	1383443	C	palmitoyltransferase PFA5	Palmitoyltransferase with autoacylation activity; likely functions in pathway(s) outside Ras; member of a family of putative palmitoyltransferases containing an Asp-His-His-Cys-cysteine rich (DHHC-CRD) domain	1254.54	-0.0744895	0.0498312	0.229239
YOR222W	ODC2	15	758330	759253	W	mitochondrial 2-oxodicarboxylate carrier	Mitochondrial inner membrane transporter; 2-oxodicarboxylate transporter, exports 2-oxoadipate and 2-oxoglutarate from the mitochondrial matrix to the cytosol for use in lysine and glutamate biosynthesis and in lysine catabolism; ODC2 has a paralog, ODC1, that arose from the whole genome duplication	4101.62	-0.0743883	0.0147753	0.10926
YGL018C	JAC1	7	459110	459664	C	J-type chaperone JAC1	Specialized J-protein that functions in Fe-S cluster biogenesis; functions with Hsp70 in Fe-S cluster biogenesis in mitochondria; involved in iron metabolism; contains a J domain typical to J-type chaperones; localizes to the mitochondrial matrix	527.565	-0.0742382	0.160133	0.440941
YHR048W	YHK8	8	204607	206151	W		Presumed antiporter of the major facilitator superfamily; member of the 12-spanner drug:H(+) antiporter DHA1 family; expression of gene is up-regulated in cells exhibiting reduced susceptibility to azoles	655.306	-0.0742014	0.12158	0.381928
YDL217C	TIM22	4	67983	68606	C	translocation channel protein TIM22	Essential core component of the mitochondrial TIM22 complex; involved in insertion of polytopic proteins into the inner membrane; forms the channel through which proteins are imported	1469.25	-0.0741027	0.0535758	0.238823
YNR010W	CSE2	14	643744	644193	W	MED9	Subunit of the RNA polymerase II mediator complex; associates with core polymerase subunits to form the RNA polymerase II holoenzyme; component of the Middle domain of mediator; required for regulation of RNA polymerase II activity; relocalizes to the cytosol in response to hypoxia	354.212	-0.0740394	0.175664	0.464302
YPR183W	DPM1	16	900755	901558	W	dolichyl-phosphate beta-D-mannosyltransferase|SED3	Dolichol phosphate mannose (Dol-P-Man) synthase of ER membrane; catalyzes formation of Dol-P-Man from Dol-P and GDP-Man; required for biosynthesis of glycosyl phosphatidylinositol (GPI) membrane anchor, as well as O-mannosylation and protein N- and O-linked glycosylation; human homolog DPM1 can complement yeast mutant strains	5804.61	-0.0739563	0.0627012	0.260538
YDR322C-A	TIM11	4	1112003	1112293	C	F1F0 ATP synthase subunit e|ATP21	Subunit e of mitochondrial F1F0-ATPase; ATPase is a large, evolutionarily conserved enzyme complex required for ATP synthesis; essential for the dimeric and oligomeric state of ATP synthase, which in turn determines the shape of inner membrane cristae	1785.7	-0.0739519	0.136547	0.408581
YGL236C	MTO1	7	53787	55796	C	tRNA modification protein MTO1|IPS1	Mitochondrial protein; forms heterodimer complex with Mss1p that performs 5-carboxymethylaminomethyl modification of the wobble uridine base in mitochondrial tRNAs; required for respiration in paromomycin-resistant 15S rRNA mutants; human homolog MTO1 can complement yeast null mutant	1649.24	-0.0738564	0.0819436	0.305629
YLR224W	UCC1	12	586464	587573	W		F-box protein and component of SCF ubiquitin ligase complexes; involved in ubiquitin-dependent protein catabolism; readily monoubiquitinated in vitro by SCF-Ubc4 complexes; SCF-Ucc1 regulates level of Cit2 citrate synthase protein to maintain citrate homeostasis, acts as metabolic switch for glyoxylate cycle; UCC1 transcription is downregulated in cells grown on C2-compounds	3453.44	-0.0738509	0.0489045	0.226972
YFR011C	MIC19	6	166746	167258	C	AIM13|MCS19	Component of the MICOS complex; MICOS (formerly MINOS or MitOS) is a mitochondrial inner membrane complex that extends into the intermembrane space and has a role in the maintenance of crista junctions, inner membrane architecture, and formation of contact sites to the outer membrane; Mic19p is peripheral to the inner membrane and may connect Mic60p with the Mic10p-Mic12p-Mic27p subcomplex; both …	1431.91	-0.0738369	0.0522071	0.234362
YNL331C	AAD14	14	16118	17248	C	putative aryl-alcohol dehydrogenase	Putative aryl-alcohol dehydrogenase; similar to P. chrysosporium aryl-alcohol dehydrogenase; mutational analysis has not yet revealed a physiological role; members of the AAD gene family comprise three pairs (AAD3 + AAD15, AAD6/AAD16 + AAD4, AAD10 + AAD14) whose two genes are more related to one another than to other members of the family	584.414	-0.0737838	0.143123	0.416865
YPL081W	RPS9A	16	404950	406044	W	uS4|ribosomal 40S subunit protein S9A|rp21|YS11|S9A|S4|S13	Protein component of the small (40S) ribosomal subunit; homologous to mammalian ribosomal protein S9 and bacterial S4; RPS9A has a paralog, RPS9B, that arose from the whole genome duplication	10051.2	-0.0737713	0.0919806	0.327162
YPR041W	TIF5	16	648704	649921	W	translation initiation factor eIF5|SUI5	Translation initiation factor eIF5; functions both as a GTPase-activating protein to mediate hydrolysis of ribosome-bound GTP and as a GDP dissociation inhibitor to prevent recycling of eIF2	16820.5	-0.0736382	0.00253566	0.0309825
YDL136W	RPL35B	4	217600	218367	W	uL29|ribosomal 60S subunit protein L35B|L35B|L29|SOS2	Ribosomal 60S subunit protein L35B; homologous to mammalian ribosomal protein L35 and bacterial L29; RPL35B has a paralog, RPL35A, that arose from the whole genome duplication	20035.9	-0.0735519	0.124845	0.38774
YPR193C	HPA2	16	922909	923379	C	histone acetyltransferase|KAT10	Tetrameric histone acetyltransferase; has similarity to Gcn5p, Hat1p, Elp3p, and Hpa3p; acetylates histones H3 and H4 in vitro and exhibits autoacetylation activity; also acetylates polyamines	35.5086	-0.0734968	0.162658	0.444702
YEL052W	AFG1	5	56571	58100	W		Protein that may act as a chaperone for cytochrome c oxidase subunits; conserved protein; may act as a chaperone in the degradation of misfolded or unassembled cytochrome c oxidase subunits; localized to matrix face of the mitochondrial inner membrane; member of the AAA family but lacks a protease domain	4323.43	-0.0734924	0.0126565	0.0985633
YLR376C	PSY3	12	872826	873554	C		Component of Shu complex (aka PCSS complex); Shu complex also includes Shu1, Csm2, Shu2, and promotes error-free DNA repair; promotes Rad51p filament assembly; Shu complex mediates inhibition of Srs2p function; Psy3p and Csm2p contain similar DNA-binding regions which work together to form a single DNA binding site; deletion of PSY3 results in a mutator phenotype; deletion increases sensitivity t…	329.275	-0.0733403	0.205124	0.503755
YJL179W	PFD1	10	88787	89116	W	prefolding complex chaperone subunit|GIM6	Subunit of heterohexameric prefoldin; prefoldin binds cytosolic chaperonin and transfers target proteins to it; involved in the biogenesis of actin and of alpha- and gamma-tubulin; prefoldin complex also localizes to chromatin of actively transcribed genes in the nucleus and facilitates transcriptional elongation	542.22	-0.0733246	0.145726	0.420327
YLR146W-A	YLR146W-A	12	433870	434058	W		Putative protein of unknown function	45.9535	-0.0731457	0.234026	0.536368
YPL091W	GLR1	16	375502	376953	W	glutathione-disulfide reductase GLR1|LPG17	Cytosolic and mitochondrial glutathione oxidoreductase; converts oxidized glutathione to reduced glutathione; cytosolic Glr1p is the main determinant of the glutathione redox state of the mitochondrial intermembrane space; mitochondrial Glr1p has a role in resistance to hyperoxia; protein abundance increases in response to DNA replication stress	11497	-0.0731302	0.0112549	0.0907641
YOL057W	YOL057W	15	220767	222902	W	dipeptidyl-peptidase III	Dipeptidyl-peptidase III; cleaves dipeptides from the amino terminus of target proteins; highly active on synthetic substrate Arg-Arg-2-naphthylamide; mammalian ortholog may be a biomarker for some cancers	6118.8	-0.0731007	0.0412115	0.207919
YHR215W	PHO12	8	552099	553502	W	acid phosphatase PHO12|PHO10	One of three repressible acid phosphatases; glycoprotein that is transported to the cell surface by the secretory pathway; pregulated by phosphate starvation; PHO12 has a paralog, PHO11, that arose from a segmental duplication	580.704	-0.0729262	0.187943	0.481145
YER014W	HEM14	5	182600	184219	W	oxygen-dependent protoporphyrinogen oxidase	Protoporphyrinogen oxidase; a mitochondrial enzyme that catalyzes the seventh step in the heme biosynthetic pathway, converting protoporphyrinogen IX to protoporphyrin IX; inhibited by diphenyl ether-type herbicides	2307.52	-0.0729174	0.0308134	0.171832
YIL148W	RPL40A	9	68708	69528	W	eL40|ubiquitin-ribosomal 60S subunit protein L40A fusion protein|L40e|L40A|UB11|UBI1|CEP52A	Ubiquitin-ribosomal 60S subunit protein L40A fusion protein; cleaved to yield ubiquitin and ribosomal protein L40A; ubiquitin may facilitate assembly of the ribosomal protein into ribosomes; homologous to mammalian ribosomal protein L40, no bacterial homolog; RPL40A has a paralog, RPL40B, that arose from the whole genome duplication; relative distribution to the nucleus increases upon DNA replica…	44178.3	-0.0728759	0.0426001	0.211419
YNL061W	NOP2	14	510540	512396	W	rRNA (cytosine-C5-)-methyltransferase NOP2|YNA1	rRNA m5C methyltransferase; methylates cytosine at position 2870 of 25S rRNA; has an essential function independent of rRNA methylation; contains seven beta-strand methyltransferase motif; essential for processing and maturation of 27S pre-rRNA and large ribosomal subunit biogenesis; localized to the nucleolus; constituent of 66S pre-ribosomal particles; rRNA methylation defect and lethality are …	11411.8	-0.0727302	0.0251318	0.154078
YJL058C	BIT61	10	326242	327873	C		Subunit of TORC2 membrane-associated complex; involved in regulation of cell cycle-dependent actin cytoskeletal dynamics during polarized growth and cell wall integrity; BIT61 has a paralog, BIT2, that arose from the whole genome duplication	924.732	-0.0724058	0.101596	0.346171
YLR108C	YLR108C	12	366667	368124	C		Protein of unknown function; green fluorescent protein (GFP)-fusion protein localizes to the nucleus; YLR108C is not an esssential gene; protein abundance increases in response to DNA replication stress; YLR108C has a paralog, YDR132C, that arose from the whole genome duplication	1205.39	-0.0723886	0.205239	0.503755
YPR021C	AGC1	16	600649	603357	C	amino acid transporter AGC1	Mitochondrial amino acid transporter; acts both as a glutamate uniporter and as an aspartate-glutamate exchanger; involved in nitrogen metabolism and nitrogen compound biosynthesis; human homolog SLC25A13 complements yeast null mutant	2685.69	-0.0723814	0.0413689	0.208292
YBR077C	SLM4	2	391805	392293	C	GSE1|NIR1|EGO3	Component of the EGO and GSE complexes; essential for integrity and function of EGO; EGO is involved in the regulation of microautophagy and GSE is required for proper sorting of amino acid permease Gap1p; gene exhibits synthetic genetic interaction with MSS4	726.004	-0.0723703	0.164467	0.447029
YGR254W	ENO1	7	1000927	1002240	W	phosphopyruvate hydratase ENO1|HSP48	Enolase I, a phosphopyruvate hydratase; catalyzes conversion of 2-phosphoglycerate to phosphoenolpyruvate during glycolysis and the reverse reaction during gluconeogenesis; expression repressed in response to glucose; protein abundance increases in response to DNA replication stress; N-terminally propionylated in vivo; ENO1 has a paralog, ENO2, that arose from the whole genome duplication	39286.1	-0.0723131	0.25357	0.556135
YNL150W	YNL150W	14	349251	349658	W		Dubious open reading frame; unlikely to encode a functional protein, based on available experimental and comparative sequence data; extensive overlap with PGA2/YNL149C, an uncharacterized gene with a proposed role in protein trafficking	11.3793	-0.0722717	0.0415007	0.208591
YNL113W	RPC19	14	412771	413199	W	DNA-directed RNA polymerase core subunit RPC19|AC19	RNA polymerase subunit AC19; common to RNA polymerases I and III	4057.08	-0.0722525	0.124603	0.387615
YOR328W	PDR10	15	931803	936497	W	ATP-binding cassette multidrug transporter PDR10	ATP-binding cassette (ABC) transporter; multidrug transporter involved in the pleiotropic drug resistance network; regulated by Pdr1p and Pdr3p	1744.9	-0.0721511	0.0488043	0.22669
YHR205W	SCH9	8	509363	511837	W	serine/threonine protein kinase SCH9|HRM2|KOM1	AGC family protein kinase; functional ortholog of mammalian S6 kinase; phosphorylated by Tor1p and required for TORC1-mediated regulation of ribosome biogenesis, translation initiation, and entry into G0 phase; involved in transactivation of osmostress-responsive genes; regulates G1 progression, cAPK activity and nitrogen activation of the FGM pathway; integrates nutrient signals and stress signa…	4018.2	-0.0721213	0.0808655	0.303773
YER048W-A	ISD11	5	250718	251002	W		Cysteine desulfurase (Nfs1p) activator; essential for the formation of the persulfide intermediate at the desulfurase active site during pyridoxal phosphate-dependent desulfuration of cysteine; required for mitochondrial iron-sulfur cluster biosynthesis; exclusive to eukaryotes, implicated as eukaryotic supplement to the bacterium-derived Fe-S cluster (ISC) assembly apparatus; involved in regulat…	946.59	-0.0720071	0.134145	0.403769
YKL163W	PIR3	11	144401	145378	W	beta-1,3-glucan linked protein|CCW8	O-glycosylated covalently-bound cell wall protein; required for cell wall stability; expression is cell cycle regulated, peaking in M/G1 and also subject to regulation by the cell integrity pathway; coding sequence contains length polymorphisms in different strains; PIR3 has a paralog, HSP150, that arose from the whole genome duplication	197.153	-0.0720011	0.268047	0.57222
YGL054C	ERV14	7	400871	401287	C	cornichon family protein	COPII-coated vesicle protein; involved in vesicle formation and incorporation of specific secretory cargo; required for the delivery of bud-site selection protein Axl2p and Nha1p antiporter to cell surface; related to Drosophila cornichon; ERV14 has a paralog, ERV15, that arose from the whole genome duplication	3627.02	-0.0719762	0.0632221	0.261577
YER147C	SCC4	5	462968	464842	C	cohesin-loading factor complex subunit SCC4	Subunit of cohesin loading factor (Scc2p-Scc4p); complex is required for the loading of cohesin complexes onto chromosomes; involved in establishing sister chromatid cohesion during double-strand break repair via phosphorylated histone H2AX	1472.83	-0.0717109	0.0705187	0.280467
YGL072C	YGL072C	7	371003	371362	C		Dubious open reading frame; unlikely to encode a functional protein, based on available experimental and comparative sequence data; partially overlaps the verified gene HSF1; null mutant displays increased resistance to antifungal agents gliotoxin, cycloheximide and H2O2	72.9124	-0.0716558	0.261766	0.565206
YLR141W	RRN5	12	423683	424774	W		Protein involved in transcription of rDNA by RNA polymerase I; transcription factor, member of UAF (upstream activation factor) family along with Rrn9p and Rrn10p	637.762	-0.0715448	0.136223	0.408103
YGR060W	ERG25	7	610564	611493	W	methylsterol monooxygenase	C-4 methyl sterol oxidase; catalyzes the first of three steps required to remove two C-4 methyl groups from an intermediate in ergosterol biosynthesis; mutants accumulate the sterol intermediate 4,4-dimethylzymosterol; human MSMO1 functionally complements the growth defect caused by repression of ERG25 expression	18007.7	-0.0715154	0.0381773	0.198474
YGL099W	LSG1	7	314631	316553	W	putative GTPase LSG1|KRE35	Putative GTPase involved in 60S ribosomal subunit biogenesis; required for the release of Nmd3p from 60S subunits in the cytoplasm	6349.13	-0.0713551	0.0449893	0.217392
YMR272C	SCS7	13	809623	810777	C	fatty acid alpha-hydroxylase|FAH1	Sphingolipid alpha-hydroxylase; functions in the alpha-hydroxylation of sphingolipid-associated very long chain fatty acids, has both cytochrome b5-like and hydroxylase/desaturase domains, not essential for growth	6368.96	-0.0712942	0.105466	0.351885
YDR022C	ATG31	4	488072	488662	C	CIS1	Autophagy-specific protein required for autophagosome formation; forms a complex with Atg17p and Atg29p that localizes other proteins to the pre-autophagosomal structure; constitutively phosphorylated, and phosphorylation of residue S174 is required for function; high-copy suppressor of CIK1 deletion	512.87	-0.071258	0.164519	0.447029
YCR043C	YCR043C	3	206261	206644	C		Putative protein of unknown function; green fluorescent protein (GFP)-fusion protein localizes to the Golgi apparatus; YCR043C is not an essential gene	1914.42	-0.0711666	0.0517169	0.233253
YJL093C	TOK1	10	254737	256812	C	YPK1|YORK|YKC1|DUK1	Outward-rectifier potassium channel of the plasma membrane; has two pore domains in tandem, each of which forms a functional channel permeable to potassium; carboxy tail functions to prevent inner gate closures; target of K1 toxin	3170.55	-0.0711479	0.0231797	0.146111
YPL153C	RAD53	16	261727	264192	C	serine/threonine/tyrosine protein kinase RAD53|SPK1|MEC2|LSD1	DNA damage response protein kinase; required for cell-cycle arrest, regulation of copper genes in response to DNA damage; phosphorylates nuclear pores to counteract gene gating, preventing aberrant transitions at forks approaching transcribed genes; activates downstream kinase Dun1p; differentially senses mtDNA depletion, mitochondrial ROS; relocalizes to cytosol under hypoxia; human homolog CHEK…	1333.43	-0.0707171	0.110105	0.361386
YDL157C	YDL157C	4	174232	174588	C		Putative protein of unknown function; the authentic, non-tagged protein is detected in highly purified mitochondria in high-throughput studies	1755.16	-0.0705213	0.123142	0.385083
YBR034C	HMT1	2	304930	305976	C	protein-arginine omega-N methyltransferase HMT1|RMT1|ODP1|HCP1	Nuclear SAM-dependent mono- and asymmetric methyltransferase; modifies hnRNPs, including Npl3p and Hrp1p, affecting their activity and nuclear export; methylates U1 snRNP protein Snp1p, ribosomal protein Rps2p, and histones H3 and H4; interacts genetically with genes encoding components of Rpd3(L) and this interaction is important for Rpd3 recruitment to the subtelomeric region	11947.6	-0.0704811	0.133678	0.402994
YOR360C	PDE2	15	1013241	1014821	C	3',5'-cyclic-nucleotide phosphodiesterase PDE2|SRA5	High-affinity cyclic AMP phosphodiesterase; component of the cAMP-dependent protein kinase signaling system, protects the cell from extracellular cAMP, contains readthrough motif surrounding termination codon	5916.18	-0.0703648	0.197964	0.496853
YDR033W	MRH1	4	508147	509109	W		Protein that localizes primarily to the plasma membrane; also found at the nuclear envelope; long-lived protein that is asymmetrically retained in the plasma membrane of mother cells; the authentic, non-tagged protein is detected in mitochondria in a phosphorylated state; null mutation confers sensitivity to acetic acid	71200.4	-0.0703445	0.0555143	0.24435
YOR157C	PUP1	15	630966	631751	C	proteasome core particle subunit beta 2	Beta 2 subunit of the 20S proteasome; endopeptidase with trypsin-like activity that cleaves after basic residues; synthesized as a proprotein before being proteolytically processed for assembly into 20S particle; human homolog is subunit Z	4909.39	-0.0703412	0.024341	0.151114
YEL050C	RML2	5	59670	60851	C	mitochondrial 54S ribosomal protein RML2	Mitochondrial ribosomal protein of the large subunit (L2); has similarity to E. coli L2 ribosomal protein; mutant allele (fat21) causes inability to utilize oleate, and induce oleic acid oxidation; may interfere with activity of the Adr1p transcription factor	2328.25	-0.0703029	0.0908639	0.324594
YBR053C	YBR053C	2	339675	340751	C		Putative protein of unknown function; induced by cell wall perturbation	2607.93	-0.0702781	0.100368	0.34464
YJR064W	CCT5	10	555914	557602	W	chaperonin-containing T-complex subunit CCT5|TCP5	Subunit of the cytosolic chaperonin Cct ring complex; related to Tcp1p, required for the assembly of actin and tubulins in vivo	16062.2	-0.070266	0.00890267	0.0768857
YNR022C	MRPL50	14	669774	670193	C	mitochondrial 54S ribosomal protein MRPL50	Mitochondrial ribosomal protein of the large subunit; not essential for mitochondrial translation	1202.96	-0.0702187	0.122517	0.383429
YLL050C	COF1	12	39804	40414	C	cofilin	Cofilin, involved in pH-dependent actin filament depolarization; binds both actin monomers and filaments and severs filaments; involved in the selective sorting, export of the secretory cargo from the late golgi; genetically interacts with pmr1; thought to be regulated by phosphorylation at SER4; ubiquitous and essential in eukaryotes	14078.9	-0.0701967	0.116607	0.373232
YLL044W	YLL044W	12	48216	48662	W		Dubious open reading frame; unlikely to encode a functional protein, based on available experimental and comparative sequence data; transcription of both YLL044W and the overlapping gene RPL8B is reduced in the gcr1 null mutant	15.9706	-0.0701148	0.0536158	0.238823
YNL031C	HHT2	14	575640	576050	C	histone H3	Histone H3; core histone protein required for chromatin assembly, part of heterochromatin-mediated telomeric and HM silencing; one of two identical histone H3 proteins (see HHT1); regulated by acetylation, methylation, and phosphorylation; H3K14 acetylation plays an important role in the unfolding of strongly positioned nucleosomes during repair of UV damage	17428.9	-0.0699913	0.0102906	0.0852117
YHR010W	RPL27A	8	126521	127492	W	eL27|ribosomal 60S subunit protein L27A|L27e|L27A|RPL27	Ribosomal 60S subunit protein L27A; homologous to mammalian ribosomal protein L27, no bacterial homolog; RPL27A has a paralog, RPL27B, that arose from the whole genome duplication	55692.3	-0.0699894	0.115148	0.371873
YLR293C	GSP1	12	720771	721430	C	Ran GTPase GSP1|CST17|CNR1	Ran GTPase; GTP binding protein (mammalian Ranp homolog) involved in the maintenance of nuclear organization, RNA processing and transport; regulated by Srm1p, Rna1p, Yrb1p, Yrb2p, Yrp4p, Yrb30p, Cse1p and Kap95p; GSP1 has a paralog, GSP2, that arose from the whole genome duplication	27612.7	-0.0698649	0.00968049	0.0819282
YLR099W-A	MIM2	12	341325	341588	W		Mitochondrial protein required for outer membrane protein import; involved in import of the subset of proteins with multiple alpha-helical transmembrane segments, including Ugo1p, Tom20p, and Fzo1p; component of a large protein complex in the outer membrane that includes Mim1p; not essential in W303 strain background	387.267	-0.0698415	0.231494	0.533555
YLR342W	FKS1	12	809997	815627	W	1,3-beta-D-glucan synthase|PBR1|GSC1|ETG1|CWH53|CND1	Catalytic subunit of 1,3-beta-D-glucan synthase; functionally redundant with alternate catalytic subunit Gsc2p; binds to regulatory subunit Rho1p; involved in cell wall synthesis and maintenance; localizes to sites of cell wall remodeling; FKS1 has a paralog, GSC2, that arose from the whole genome duplication	45714.1	-0.069649	0.0984909	0.340021
YNL052W	COX5A	14	531725	532186	W	cytochrome c oxidase subunit Va	Subunit Va of cytochrome c oxidase; cytochrome c oxidase is the terminal member of the mitochondrial inner membrane electron transport chain; Cox5Ap is predominantly expressed during aerobic growth while its isoform Vb (Cox5Bp) is expressed during anaerobic growth; COX5A has a paralog, COX5B, that arose from the whole genome duplication	2397.36	-0.0696461	0.0832505	0.307723
YHR062C	RPP1	8	222877	223758	C	RNA-binding RNA processing protein RPP1	Subunit of both RNase MRP and nuclear RNase P; RNase MRP cleaves pre-rRNA, while nuclear RNase P cleaves tRNA precursors to generate mature 5' ends and facilitates turnover of nuclear RNAs; relocalizes to the cytosol in response to hypoxia	2241.88	-0.0696327	0.0621946	0.259182
YMR235C	RNA1	13	741512	742735	C	GTPase-activating protein RNA1	GTPase activating protein (GAP) for Gsp1p; involved in nuclear transport	14303	-0.069611	0.00818373	0.0721246
YEL054C	RPL12A	5	52721	53218	C	uL11|ribosomal 60S subunit protein L12A|L11|YL23|L15A|L12A	Ribosomal 60S subunit protein L12A; rpl12a rpl12b double mutant exhibits slow growth and slow translation; homologous to mammalian ribosomal protein L12 and bacterial L11; RPL12A has a paralog, RPL12B, that arose from the whole genome duplication	36475.1	-0.0695962	0.0209484	0.136687
YHR193C	EGD2	8	487712	488236	C		Alpha subunit of the nascent polypeptide-associated complex (NAC); involved in protein sorting and translocation; associated with cytoplasmic ribosomes	26948.4	-0.0695258	0.0657652	0.267665
YGL169W	SUA5	7	186059	187339	W	threonylcarbamoyladenylate synthase	Protein involved in threonylcarbamoyl adenosine biosynthesis; Sua5p and Qri7p are necessary and sufficient for RNA t6A modification in vitro; null mutant lacks N6-threonylcarbamoyl adenosine (t6A) modification in the anticodon loop of ANN-decoding tRNA; member of conserved YrdC/Sua5 family; binds single-stranded telomeric DNA and null mutant has abnormal telomere length	3517.52	-0.0693276	0.0388576	0.200682
YGL166W	CUP2	7	191129	191806	W	ACE1	Copper-binding transcription factor; activates transcription of the metallothionein genes CUP1-1 and CUP1-2 in response to elevated copper concentrations; required for regulation of copper genes in response to DNA-damaging reagents; CUP2 has a paralog, HAA1, that arose from the whole genome duplication	878.34	-0.0693052	0.115891	0.372394
YDR372C	VPS74	4	1221112	1222149	C	MNN3|API1	Golgi phosphatidylinositol-4-kinase effector and PtdIns4P sensor; interacts with the cytosolic domains of cis and medial glycosyltransferases, and in the PtdIns4P-bound state mediates the targeting of these enzymes to the Golgi; interacts with the catalytic domain of Sac1p, the major cellular PtdIns4P phosphatase, to direct dephosphosphorylation of the Golgi pool of PtdIns4P; tetramerization requ…	5856.23	-0.069258	0.0156119	0.113874
YOR283W	YOR283W	15	847453	848145	W	phosphoglycerate mutase	Phosphatase with a broad substrate specificity; has some similarity to GPM1/YKL152C, a phosphoglycerate mutase; YOR283W is not an essential gene	3583.79	-0.0692337	0.0602855	0.255248
YKL206C	ADD66	11	49006	49809	C	POC2|PBA2	Protein involved in 20S proteasome assembly; forms a heterodimer with Pba1p that binds to proteasome precursors; interaction with Pba1p-Add66p may affect function of the mature proteasome and its role in maintaining respiratory metabolism; similar to human PAC2 constituent of the PAC1-PAC2 complex involved in proteasome assembly	1464.39	-0.0692275	0.0579554	0.250777
YGL208W	SIP2	7	97338	98585	W	SPM2	One of three beta subunits of the Snf1 kinase complex; involved in the response to glucose starvation; null mutants exhibit accelerated aging; N-myristoylprotein localized to the cytoplasm and the plasma membrane; SIP2 has a paralog, GAL83, that arose from the whole genome duplication	714.044	-0.0691624	0.150619	0.427422
YDL003W	MCD1	4	444683	446383	W	kleisin alpha|SCC1|RHC21|PDS3	Essential alpha-kleisin subunit of the cohesin complex; required for sister chromatid cohesion in mitosis and meiosis; apoptosis induces cleavage and translocation of a C-terminal fragment to mitochondria; expression peaks in S phase	4447.04	-0.0691544	0.0691285	0.276466
YLL041C	SDH2	12	53131	53931	C	succinate dehydrogenase iron-sulfur protein subunit SDH2|SDHB|ACN17	Iron-sulfur protein subunit of succinate dehydrogenase; the complex couples the oxidation of succinate to the transfer of electrons to ubiquinone as part of the TCA cycle and the mitochondrial respiratory chain; other members are Sdh1p, Sdh3p, and Sdh4p	2105.11	-0.0690526	0.131168	0.398135
YHR171W	ATG7	8	445713	447605	W	APG11|APG7|CVT2	Autophagy-related protein and dual specificity member of the E1 family; mediates the attachment of Atg12p to Atg5p and Atg8p to phosphatidylethanolamine which are required steps in autophagosome formation; E1 enzymes are also known as ubiquitin-activating enzymes; involved in methionine restriction extension of chronological lifespan in an autophagy-dependent manner	619.922	-0.069048	0.148334	0.424074
YOR142W	LSC1	15	593057	594046	W	succinate--CoA ligase (GDP-forming) subunit alpha	Alpha subunit of succinyl-CoA ligase; succinyl-CoA ligase is a mitochondrial enzyme of the TCA cycle that catalyzes the nucleotide-dependent conversion of succinyl-CoA to succinate; phosphorylated	7061.52	-0.0689303	0.0122711	0.0964753
YGR077C	PEX8	7	637744	639513	C	PAS6	Intraperoxisomal organizer of the peroxisomal import machinery; organizes the formation of the importomer complex, bridging the docking complex with the RING finger complex; tightly associated with the lumenal face of the peroxisomal membrane; essential for peroxisome biogenesis; binds PTS1-signal receptor Pex5p, and PTS2-signal receptor Pex7p	2304.51	-0.0688748	0.0356806	0.18978
YBR196C	PGI1	2	612236	613900	C	glucose-6-phosphate isomerase|CDC30	Glycolytic enzyme phosphoglucose isomerase; catalyzes the interconversion of glucose-6-phosphate and fructose-6-phosphate; required for cell cycle progression and completion of the gluconeogenic events of sporulation	106756	-0.0688717	0.0306412	0.171737
YLR168C	UPS2	12	499578	500270	C	GEP1|AIM30|MSF1|MSF1'	Mitochondrial intermembrane space protein; involved in phospholipid metabolism; forms complex with Mdm35p that transfers phosphatidylserine from outer membrane to inner membrane for phosphatidylethanolamine synthesis; null mutant has defects in mitochondrial morphology; similar to Ups1p, Ups3p and to human PRELI; UPS2 has a paralog, UPS3, that arose from the whole genome duplication	1698.59	-0.0688621	0.0716096	0.28324
YML035C	AMD1	13	206428	208860	C	AMP deaminase|AMD3	AMP deaminase; tetrameric enzyme that catalyzes the deamination of AMP to form IMP and ammonia; thought to be involved in regulation of intracellular purine (adenine, guanine, and inosine) nucleotide pools	5187.36	-0.0687891	0.0256163	0.155508
YMR069W	NAT4	13	407709	408566	W	NAA40	N alpha-acetyl-transferase; involved in acetylation of the N-terminal residues of histones H4 and H2A	243.276	-0.0687671	0.248705	0.551931
YGL136C	MRM2	7	252897	253859	C	21S rRNA (uridine2791-2'-O) methyltransferase	Mitochondrial 2' O-ribose methyltransferase; required for methylation of U(2791) in 21S rRNA; MRM2 deletion confers thermosensitive respiration and loss of mitochondrial DNA; has similarity to Spb1p and Trm7p, and to E. coli FtsJ/RrmJ	1076.85	-0.0686669	0.0748204	0.290714
YKL058W	TOA2	11	330166	330534	W	transcription initiation factor IIA subunit gamma	TFIIA small subunit; involved in transcriptional activation, acts as antirepressor or as coactivator; required, along with Toa1p, for ribosomal protein gene transcription in vivo; homologous to smallest subunit of human and Drosophila TFIIA; protein abundance increases in response to DNA replication stress	1468.79	-0.0686085	0.0695528	0.277392
YNL056W	OCA2	14	517249	517842	W		Protein of unknown function; similar to predicted tyrosine phosphatases Oca1p and Siw14p; green fluorescent protein (GFP)-fusion protein localizes to the cytoplasm; YNL056W is not an essential gene	1781.02	-0.0685971	0.0487934	0.22669
YDR087C	RRP1	4	617470	618306	C		Essential evolutionarily conserved nucleolar protein; necessary for biogenesis of 60S ribosomal subunits and for processing of pre-rRNAs to mature rRNA; associated with several distinct 66S pre-ribosomal particles	4346.69	-0.0685669	0.0857841	0.314852
YNL218W	MGS1	14	238238	240001	W	ssDNA-dependent ATPase MGS1	Protein with DNA-dependent ATPase and ssDNA annealing activities; involved in maintenance of genome; interacts functionally with DNA polymerase delta; homolog of human Werner helicase interacting protein (WHIP); forms nuclear foci upon DNA replication stress	1222.98	-0.0684189	0.0831889	0.307723
YGL211W	NCS6	7	92512	93591	W	TUC1|YGL210W-A	Protein required for uridine thiolation of Gln, Lys, and Glu tRNAs; required for the thiolation of uridine at the wobble position of Gln, Lys, and Glu tRNAs; has a role in urmylation and in invasive and pseudohyphal growth; inhibits replication of Brome mosaic virus in S. cerevisiae	3152.02	-0.068394	0.0421328	0.210299
YGR123C	PPT1	7	736662	738203	C	protein serine/threonine phosphatase	Protein serine/threonine phosphatase; regulates Hsp90 chaperone by affecting its ATPase and cochaperone binding activities; has similarity to human phosphatase PP5; present in both the nucleus and cytoplasm; expressed during logarithmic growth	5505.42	-0.06838	0.0426833	0.211579
YDR378C	LSM6	4	1229349	1229609	C	U4/U6-U5 snRNP complex subunit LSM6	Lsm (Like Sm) protein; part of heteroheptameric complexes (Lsm2p-7p and either Lsm1p or 8p): cytoplasmic Lsm1p complex involved in mRNA decay; nuclear Lsm8p complex part of U6 snRNP and possibly involved in processing tRNA, snoRNA, and rRNA	1406.7	-0.0683573	0.104715	0.35139
YGR125W	YGR125W	7	742325	745435	W		Putative protein of unknown function; deletion mutant has decreased rapamycin resistance but normal wormannin resistance; green fluorescent protein (GFP)-fusion protein localizes to the vacuole	4202.53	-0.0683133	0.0320094	0.17645
YOR312C	RPL20B	15	900250	901194	C	eL20|ribosomal 60S subunit protein L20B|L20e|L20B|L18B|RPL18A1	Ribosomal 60S subunit protein L20B; homologous to mammalian ribosomal protein L18A, no bacterial homolog; RPL20B has a paralog, RPL20A, that arose from the whole genome duplication	58732.8	-0.0682761	0.0859022	0.315084
YOR253W	NAT5	15	804377	804907	W	peptide alpha-N-acetyltransferase subunit NAT5|NAA50|ROG2|ARD2	Subunit of protein N-terminal acetyltransferase NatA; NatA is comprised of Nat1p, Ard1p, and Nat5p; N-terminally acetylates many proteins, which influences multiple processes such as the cell cycle, heat-shock resistance, mating, sporulation, and telomeric silencing	2868.93	-0.0682123	0.0472166	0.223832
YJL112W	MDV1	10	205305	207449	W	NET2|GAG3|FIS2	Peripheral protein of cytosolic face of mitochondrial outer membrane; required for mitochondrial fission; interacts with Fis1p and with the self-assembled oligomeric form of the dynamin-related GTPase Dnm1p; contains WD repeats; MDV1 has a paralog, CAF4, that arose from the whole genome duplication	3286.67	-0.0681324	0.0274141	0.160988
YDL047W	SIT4	4	369771	370706	W	type 2A-related serine/threonine-protein phosphatase SIT4|PPH1	Ceramide-activated, type 2A-related serine-threonine phosphatase; functions in G1/S transition of mitotic cycle; controls lifespan, mitochondrial function, cell cycle progression by regulating HXK2 phosphorylation; regulator of COPII coat dephosphorylation; required for ER to Golgi traffic; interacts with Hrr25p kinase; cytoplasmic and nuclear protein that modulates functions mediated by Pkc1p in…	3980.15	-0.0681172	0.0625419	0.260231
YLR047C	FRE8	12	239347	241407	C	putative ferric-chelate reductase	Protein with sequence similarity to iron/copper reductases; involved in iron homeostasis; deletion mutant has iron deficiency/accumulation growth defects; expression increased in the absence of copper-responsive transcription factor Mac1p	956.513	-0.0680712	0.153836	0.432363
YOL038W	PRE6	15	255337	256101	W	proteasome core particle subunit alpha 4	Alpha 4 subunit of the 20S proteasome; may replace alpha 3 subunit (Pre9p) under stress conditions to create a more active proteasomal isoform; GFP-fusion protein relocates from cytosol to the mitochondrial surface upon oxidative stress	7629.69	-0.0680566	0.0107631	0.0877902
YHR169W	DBP8	8	442181	443476	W	ATP-dependent RNA helicase DBP8	ATPase, putative RNA helicase of the DEAD-box family; component of 90S preribosome complex involved in production of 18S rRNA and assembly of 40S small ribosomal subunit; ATPase activity stimulated by association with Esf2p	4429.22	-0.0679095	0.114213	0.369683
YBR025C	OLA1	2	290681	291865	C	Obg-like ATPase	P-loop ATPase with similarity to human OLA1 and bacterial YchF; identified as specifically interacting with the proteasome; null mutant displays increased translation rate and increased readthrough of premature stop codons; protein abundance increases in response to hydrogen peroxide and to DNA replication stress	40403.5	-0.0679034	0.0582877	0.251953
YKR095W-A	PCC1	11	625864	626205	W	chromatin DNA-binding EKC/KEOPS complex subunit PCC1	Component of the EKC/KEOPS protein complex; EKC/KEOPS complex is required for t6A tRNA modification and telomeric TG1-3 recombination; may have role in transcription; other complex members are Kae1p, Gon7p, Bud32p, and Cgi121p	624.868	-0.0678815	0.175707	0.464302
YOR074C	CDC21	15	466675	467589	C	thymidylate synthase|YOR29-25|TMP1|CRT9	Thymidylate synthase; required for de novo biosynthesis of pyrimidine deoxyribonucleotides; expression is induced at G1/S; human homolog TYMSOS can complement yeast cdc21 temperature-sensitive mutant at restrictive temperature	1949.61	-0.0677612	0.1514	0.42837
YDL060W	TSR1	4	341619	343985	W		Protein required for processing of 20S pre-rRNA in the cytoplasm; associates with pre-40S ribosomal particles; inhibits the premature association of 60S subunits with assembling 40S subunits in the cytoplasm; similar to Bms1p; relocalizes from nucleus to cytoplasm upon DNA replication stress	11908.4	-0.067742	0.0255774	0.155505
YLR441C	RPS1A	12	1018141	1018908	C	eS1|ribosomal 40S subunit protein S1A|S1e|rp10A|S1A|RP10A	Ribosomal protein 10 (rp10) of the small (40S) subunit; homologous to mammalian ribosomal protein S3A, no bacterial homolog; RPS1A has a paralog, RPS1B, that arose from the whole genome duplication	88511	-0.0676245	0.0913169	0.325584
YHL039W	EFM1	8	21783	23540	W	protein-lysine N-methyltransferase	Lysine methyltransferase; involved in the monomethylation of eEF1A (Tef1p/Tef2p); SET-domain family member; predicted involvement in ribosome biogenesis; green fluorescent protein (GFP)-fusion protein localizes to the cytoplasm	5082.17	-0.0675941	0.0495419	0.228273
YPL037C	EGD1	16	481428	481901	C		Subunit beta1 of the nascent polypeptide-associated complex (NAC); involved in protein targeting, associated with cytoplasmic ribosomes; enhances DNA binding of the Gal4p activator; homolog of human BTF3b; EGD1 has a paralog, BTT1, that arose from the whole genome duplication	21846.3	-0.0675233	0.0737532	0.288938
YPR144C	NOC4	16	819765	821423	C	ribosome biosynthesis protein NOC4|UTP19	Nucleolar protein; forms a complex with Nop14p that mediates maturation and nuclear export of 40S ribosomal subunits; relocalizes to the cytosol in response to hypoxia	6152.4	-0.067512	0.0657124	0.26764
YJL174W	KRE9	10	95092	95922	W		Glycoprotein involved in cell wall beta-glucan assembly; null mutation leads to severe growth defects, aberrant multibudded morphology, and mating defects	7307.3	-0.0674665	0.0210614	0.13711
YMR131C	RRB1	13	533163	534698	C	ribosome biosynthesis protein RRB1	Specific chaperone for ribosomal protein Rpl3p; binds to nascent Rpl3p during translation; essential gene	21418.2	-0.0674617	0.0268238	0.158331
YBR185C	MBA1	2	599123	599959	C		Membrane-associated mitochondrial ribosome receptor; forms a complex with Mdm38p that may facilitate recruitment of mRNA-specific translational activators to ribosomes; possible role in protein export from the matrix to inner membrane	1189.09	-0.0674068	0.104666	0.35139
YLR431C	ATG23	12	1000342	1001703	C	CVT23	Peripheral membrane protein required for autophagy and CVT; required for cytoplasm-to-vacuole targeting (Cvt) pathway and efficient macroautophagy; cycles between the phagophore assembly site (PAS) and non-PAS locations; forms a complex with Atg9p and Atg27p	960.065	-0.0672234	0.111147	0.363025
YOR107W	RGS2	15	521353	522282	W	GTPase-activating protein RGS2	Negative regulator of glucose-induced cAMP signaling; directly activates the GTPase activity of the heterotrimeric G protein alpha subunit Gpa2p	1572.1	-0.0672034	0.249915	0.553344
YER004W	FMP52	5	159580	160275	W		Protein of unknown function; localized to the mitochondrial outer membrane; induced by treatment with 8-methoxypsoralen and UVA irradiation	3709.53	-0.0671455	0.0295183	0.167968
YBR091C	TIM12	2	427155	427484	C	MRS5	Essential protein of the inner mitochondrial membrane; peripherally localized; component of the TIM22 complex, which is a twin-pore translocase that mediates insertion of numerous multispanning inner membrane proteins	429.501	-0.0671412	0.194819	0.492394
YBL010C	YBL010C	2	206107	206949	C		Putative protein of unknown function; green fluorescent protein (GFP)-fusion protein colocalizes with clathrin-coated vesicles	912.427	-0.0671376	0.127007	0.391257
YJL069C	UTP18	10	310922	312706	C		Small-subunit processome protein involved in pre-18S rRNA maturation; part of a subunit of the 90S preribosomal particle capable of interacting directly with the 5' ETS of the 35S pre-rRNA; contains WD40 repeats	7526.25	-0.0671055	0.0875516	0.318898
YMR092C	AIP1	13	451632	453479	C		Actin cortical patch component; interacts with the actin depolymerizing factor cofilin; inhibits elongation of aged ADP-actin filaments decorated with cofilin to maintain a high level of assembly-competent actin species; required to restrict cofilin localization to cortical patches; putative regulator of cytokinesis; contains WD repeats; protein increases in abundance and relocalizes from cytopla…	8717.53	-0.0671021	0.0629655	0.261071
YDR039C	ENA2	4	531307	534582	C	Na(+)-exporting P-type ATPase ENA2	P-type ATPase sodium pump; involved in Na+ efflux to allow salt tolerance; likely not involved in Li+ efflux	6487.73	-0.067054	0.039197	0.201264
YMR179W	SPT21	13	619858	622134	W		Protein with a role in transcriptional silencing; required for normal transcription at several loci including HTA2-HTB2 and HHF2-HHT2, but not required at the other histone loci; functionally related to Spt10p; localizes to nuclear foci that become diffuse upon DNA replication stress	2189.51	-0.0670449	0.08742	0.318621
YDR025W	RPS11A	4	491515	492324	W	uS17|ribosomal 40S subunit protein S11A|S17|rp41A|YS12|S18A|S11A	Protein component of the small (40S) ribosomal subunit; homologous to mammalian ribosomal protein S11 and bacterial S17; N-terminally propionylated in vivo; RPS11A has a paralog, RPS11B, that arose from the whole genome duplication	35900.9	-0.0669253	0.0381392	0.198474
YOL028C	YAP7	15	270633	271370	C		Putative basic leucine zipper (bZIP) transcription factor; YAP7 has a paralog, YAP5, that arose from the whole genome duplication	1239.74	-0.0669216	0.130781	0.397652
YCR064C	YCR064C	3	228095	228505	C		Dubious open reading frame; unlikely to encode a functional protein, based on available experimental and comparative sequence data; partially overlaps the verified gene BUD31	41.1914	-0.0669134	0.25555	0.558774
YDL078C	MDH3	4	315357	316388	C	malate dehydrogenase MDH3	Peroxisomal malate dehydrogenase; catalyzes interconversion of malate and oxaloacetate; involved in the glyoxylate cycle	7137.28	-0.066815	0.0363898	0.191955
YKR043C	SHB17	11	520897	521712	C	sedoheptulose-bisphosphatase	Sedoheptulose bisphosphatase involved in riboneogenesis; dephosphorylates sedoheptulose 1,7-bisphosphate, which is converted via the nonoxidative pentose phosphate pathway to ribose-5-phosphate; facilitates the conversion of glycolytic intermediates to pentose phosphate units; also has fructose 1,6-bisphosphatase activity but this is probably not biologically relevant, since deletion does not aff…	9600.76	-0.0667968	0.0306386	0.171737
YCR072C	RSA4	3	240805	242352	C		WD-repeat protein involved in ribosome biogenesis; may interact with ribosomes; required for maturation and efficient intra-nuclear transport or pre-60S ribosomal subunits, localizes to the nucleolus	5131.74	-0.0667777	0.104844	0.351414
YPL131W	RPL5	16	303121	304014	W	uL18|ribosomal 60S subunit protein L5|L18|YL3|L5|L1a|RPL1|LPI14	Ribosomal 60S subunit protein L5; nascent Rpl5p is bound by specific chaperone Syo1p during translation; homologous to mammalian ribosomal protein L5 and bacterial L18; binds 5S rRNA and is required for 60S subunit assembly	137845	-0.0667191	0.0192024	0.129251
YKL053C-A	MDM35	11	339182	339442	C		Mitochondrial intermembrane space protein; forms complex with Ups2p that transfers phosphatidylserine from outer membrane to inner membrane for phosphatidylethanolamine synthesis; mutation affects mitochondrial distribution and morphology; contains twin cysteine-x9-cysteine motifs; protein abundance increases in response to DNA replication stress	489.925	-0.0667118	0.253537	0.556135
YJL177W	RPL17B	10	90786	91657	W	uL22|ribosomal 60S subunit protein L17B|L22|YL17|L20B|L17B	Ribosomal 60S subunit protein L17B; required for processing of 27SB pre-rRNA and formation of stable 66S assembly intermediates; homologous to mammalian ribosomal protein L17 and bacterial L22; RPL17B has a paralog, RPL17A, that arose from the whole genome duplication	37168.3	-0.0666029	0.00529041	0.0523912
YDR211W	GCD6	4	884727	886865	W	translation initiation factor eIF2B catalytic subunit epsilon	Catalytic epsilon subunit of the translation initiation factor eIF2B; eIF2B is the guanine-nucleotide exchange factor for eIF2; activity subsequently regulated by phosphorylated eIF2; first identified as a negative regulator of GCN4 expression; forms cytoplasmic foci upon DNA replication stress	12202.3	-0.0664466	0.0232312	0.146203
YJL151C	SNA3	10	136372	136773	C		Protein involved in efficient MVB sorting of proteins to the vacuole; may function as an RSP5 adapter protein for MVB cargos; integral membrane protein localized to vacuolar intralumenal vesicles	2318.9	-0.0664081	0.185059	0.477158
YLR197W	NOP56	12	546097	547611	W	snoRNP complex protein NOP56|SIK1	Essential evolutionarily-conserved nucleolar protein; component of the box C/D snoRNP complexes that direct 2'-O-methylation of pre-rRNA during its maturation; overexpression causes spindle orientation defects	36404.5	-0.0663367	0.0352048	0.188119
YJL080C	SCP160	10	285558	289226	C		Essential RNA-binding G protein effector of mating response pathway; ligand-activated RNA-binding protein that delivers RNAs involved in polarization and perpetualizing mating signal to shmoo tip during pheromone signaling; Scp160p-mediated RNA trafficking essential for chemotropism and successful mating; mainly associated with nuclear envelope and ER, interacts in mRNA-dependent manner with tran…	19259.8	-0.0662166	0.0906927	0.324386
YFL034C-A	RPL22B	6	64243	64932	C	eL22|ribosomal 60S subunit protein L22B|L22e|rp4|l1c|YL31|L22B|YFL035C-B	Ribosomal 60S subunit protein L22A; required for translation of long 5' UTR of IME1 mRNA and meiotic entry; homologous to mammalian ribosomal protein L22, no bacterial homolog; RPL22B has a paralog, RPL22A, that arose from the whole genome duplication	3650.07	-0.0661958	0.0722639	0.284848
YFR029W	PTR3	6	210937	212973	W	RAA2|SSY3	Component of the SPS plasma membrane amino acid sensor system; senses external amino acid concentration and transmits intracellular signals that result in regulation of expression of amino acid permease genes; other members are Ssy1p, Ptr3p, and Ssy5p	1213.87	-0.0661217	0.119703	0.379346
YJR069C	HAM1	10	568806	569399	C	nucleoside triphosphate pyrophosphohydrolase HAM1	Nucleoside triphosphate pyrophosphohydrolase; active against various substrates including ITP, dITP and XTP; mediates exclusion of non canonical purines, pyrimidines from dNTP pools; functions with YJL055W to mediate resistance to 5-FU; specifically reduces the incorporation of 5-FU into RNA without affecting uptake or incorporation of uracil into RNA; protein abundance increases in response to D…	3382.34	-0.0660911	0.071287	0.28251
YDR260C	SWM1	4	976717	977229	C	APC13	Subunit of the anaphase-promoting complex (APC); APC is an E3 ubiquitin ligase that regulates the metaphase-anaphase transition and exit from mitosis; required for activation of the daughter-specific gene expression and spore wall maturation	895.218	-0.066074	0.199925	0.499375
YLR080W	EMP46	12	287916	289250	W		Integral membrane component of ER-derived COPII-coated vesicles; functions in ER to Golgi transport; EMP46 has a paralog, EMP47, that arose from the whole genome duplication	513.161	-0.0660314	0.200344	0.499774
YPL236C	ENV7	16	101608	102702	C	putative serine/threonine protein kinase ENV7	Vacuolar membrane protein kinase; negatively regulates membrane fusion; associates with vacuolar membrane through palmitoylation of one or more cysteines in consensus sequence; vacuolar membrane association is essential to its kinase activity; mutant shows defect in CPY processing; ortholog of human serine/threonine kinase 16 (STK16)	664.374	-0.066031	0.15178	0.428394
YER154W	OXA1	5	475020	476228	W	membrane insertase OXA1|PET1402	Mitochondrial inner membrane insertase; mediates the insertion of both mitochondrial- and nuclear-encoded proteins from the matrix into the inner membrane; also has a role in insertion of carrier proteins into the inner membrane; acts as a voltage-gated ion channel, activated by substrate peptides; interacts with mitochondrial ribosomes; conserved from bacteria to animals	3047.38	-0.0659101	0.117114	0.374071
YNL130C	CPT1	14	379558	380831	C	diacylglycerol cholinephosphotransferase	Cholinephosphotransferase; required for phosphatidylcholine biosynthesis and for inositol-dependent regulation of EPT1 transcription; CPT1 has a paralog, EPT1, that arose from the whole genome duplication	9228.2	-0.0658621	0.0197936	0.131784
YDL143W	CCT4	4	199996	201582	W	chaperonin-containing T-complex subunit CCT4|ANC2|TCP4	Subunit of the cytosolic chaperonin Cct ring complex; related to Tcp1p, required for the assembly of actin and tubulins in vivo	18592.3	-0.0658316	0.0335707	0.182092
YDL168W	SFA1	4	159604	160764	W	bifunctional alcohol dehydrogenase/S-(hydroxymethyl)glutathione dehydrogenase|ADH5	Bifunctional alcohol dehydrogenase and formaldehyde dehydrogenase; formaldehyde dehydrogenase activity is glutathione-dependent; functions in formaldehyde detoxification and formation of long chain and complex alcohols, regulated by Hog1p-Sko1p; protein abundance increases in response to DNA replication stress	5990.93	-0.0658075	0.0514789	0.232869
YGR232W	NAS6	7	953960	954646	W		Evolutionarily conserved 19S regulatory particle assembly-chaperone; proteasome-interacting protein involved in the assembly of the base subcomplex of the 19S proteasomal regulatory particle (RP); ortholog of human oncoprotein gankyrin, also known as p28, which interacts with the Rb tumor suppressor and CDK4/6	2186.12	-0.0657895	0.0710913	0.281965
YOR380W	RDR1	15	1051290	1052930	W		Transcriptional repressor involved in regulating multidrug resistance; negatively regulates expression of the PDR5 gene; member of the Gal4p family of zinc cluster proteins	640.75	-0.0657772	0.205335	0.503755
YCR087W	YCR087W	3	263976	264491	W		Dubious open reading frame; unlikely to encode a functional protein, based on available experimental and comparative sequence data; partially overlaps uncharacterized gene YCR087C-A; YCR087W is not an essential gene	20.8454	-0.0657748	0.151308	0.42837
YLR186W	EMG1	12	523632	524390	W	18S rRNA pseudouridine methyltransferase|NEP1	Methyltransferase for rRNA; methylates pseudouridine 18S rRNA residue 1191; member of the SPOUT methyltransferase family; required for maturation of 18S rRNA and for 40S ribosomal subunit production independent of methyltransferase activity; forms homodimers; human ortholog is mutated in Bowen-Conradi syndrome, and equivalent yeast mutation affects Emg1p dimerization and localization but not meth…	5909.84	-0.0657494	0.0303902	0.171635
YER076C	YER076C	5	312590	313498	C		Putative protein of unknown function; the authentic, non-tagged protein is detected in highly purified mitochondria in high-throughput studies; analysis of HA-tagged protein suggests a membrane localization	576.038	-0.0657237	0.181386	0.471155
YLL014W	EMC6	12	121322	121648	W		Member of conserved ER transmembrane complex; required for efficient folding of proteins in the ER; null mutant displays induction of the unfolded protein response; homologous to worm F33D4.7/EMC-6, fly CG11781, human TMEM93	2396.96	-0.0657119	0.0645573	0.264998
YJR141W	IPA1	10	695906	696949	W	putative polyadenylation protein	Essential protein of unknown function	1341.32	-0.0656762	0.144489	0.418909
YHR064C	SSZ1	8	225525	227141	C	PDR13	Hsp70 protein that interacts with Zuo1p (a DnaJ homolog); interacts with Zuo1p to form a ribosome-associated complex that binds the ribosome via the Zuo1p subunit; also involved in pleiotropic drug resistance via sequential activation of PDR1 and PDR5; binds ATP	40762.6	-0.0656636	0.0394401	0.202117
YNR040W	YNR040W	14	699690	700460	W		Putative protein of unknown function; the authentic, non-tagged protein is detected in highly purified mitochondria in high-throughput studies	802.761	-0.0656001	0.177475	0.466379
YOR133W	EFT1	15	575098	577626	W	elongation factor 2	Elongation factor 2 (EF-2), also encoded by EFT2; catalyzes ribosomal translocation during protein synthesis; contains diphthamide, the unique posttranslationally modified histidine residue specifically ADP-ribosylated by diphtheria toxin; EFT1 has a paralog, EFT2, that arose from the whole genome duplication	103258	-0.0655786	0.0467584	0.222576
YOR020C	HSP10	15	370524	370844	C	CPN10	Mitochondrial matrix co-chaperonin; inhibits the ATPase activity of Hsp60p, a mitochondrial chaperonin; involved in protein folding and sorting in the mitochondria; 10 kD heat shock protein with similarity to E. coli groES	4547.84	-0.0652664	0.137672	0.41052
YIL133C	RPL16A	9	98527	99416	C	uL13|ribosomal 60S subunit protein L16A|L13|rp22|YL15|L21A|L16A|RPL13	Ribosomal 60S subunit protein L16A; N-terminally acetylated, binds 5.8 S rRNA; transcriptionally regulated by Rap1p; homologous to mammalian ribosomal protein L13A and bacterial L13; RPL16A has a paralog, RPL16B, that arose from the whole genome duplication; protein abundance increases in response to DNA replication stress	47374.5	-0.0652658	0.0243961	0.15113
YBL057C	PTH2	2	112801	113427	C	aminoacyl-tRNA hydrolase	One of two mitochondrially-localized peptidyl-tRNA hydrolases; negatively regulates the ubiquitin-proteasome pathway via interactions with ubiquitin-like ubiquitin-associated proteins; dispensable for cell growth; see also PTH1	2553.74	-0.0652189	0.0575562	0.249666
YOR155C	ISN1	15	626628	627980	C	IMP 5'-nucleotidase	Inosine 5'-monophosphate (IMP)-specific 5'-nucleotidase; catalyzes the breakdown of IMP to inosine; responsible for production of nicotinamide riboside and nicotinic acid riboside; expression positively regulated by nicotinic acid and glucose availability; does not show similarity to known 5'-nucleotidases from other organisms	2677.59	-0.0651617	0.0671347	0.27075
YIL016W	SNL1	9	321454	321933	W		Ribosome-associated protein; proposed to act in protein synthesis and nuclear pore complex biogenesis and maintenance as well as protein folding; has similarity to the mammalian BAG-1 protein	1441.69	-0.0650678	0.15055	0.427422
YPL143W	RPL33A	16	282122	282970	W	eL33|ribosomal 60S subunit protein L33A|L33e|rp47|l37A|YL37|L33A|RPL37A	Ribosomal 60S subunit protein L33A; N-terminally acetylated; rpl33a null mutant exhibits slow growth while rpl33a rpl33b double null mutant is inviable; homologous to mammalian ribosomal protein L35A, no bacterial homolog; RPL33A has a paralog, RPL33B, that arose from the whole genome duplication	33525.9	-0.0650558	0.0312036	0.173003
YNL083W	SAL1	14	471377	472861	W	Ca(2+)-binding ATP:ADP antiporter SAL1	ADP/ATP transporter; member of the Ca2+-binding subfamily of mitochondrial carriers, with two EF-hand motifs; transport activity of either Sal1p or Pet9p is critical for viability; polymorphic in different S. cerevisiae strains	1221.39	-0.0649154	0.100797	0.345395
YBR247C	ENP1	2	713004	714455	C	snoRNA-binding rRNA-processing protein ENP1|MEG1	Protein associated with U3 and U14 snoRNAs; required for pre-rRNA processing and 40S ribosomal subunit synthesis; localized in the nucleus and concentrated in the nucleolus; human BYSL functionally complements the heat sensitivity of an enp1 ts mutant	8586.31	-0.0648233	0.0492149	0.228045
YDR214W	AHA1	4	892875	893927	W		Co-chaperone that binds Hsp82p and activates its ATPase activity; plays a role in determining prion variants; similar to Hch1p; expression is regulated by stresses such as heat shock; protein abundance increases in response to DNA replication stress	6677.52	-0.0648177	0.162836	0.444976
YLR324W	PEX30	12	779215	780786	W	peroxisome biogenesis protein	ER-resident protein involved in peroxisomal biogenesis; ER-localized protein that associates with peroxisomes; interacts with Pex29p and reticulons Rtn1p and Yop1p to regulate peroxisome biogenesis from the ER; role in peroxisomal-destined vesicular flow from the ER; partially redundant with Pex31p; may function at a step downstream of steps mediated by Pex28p and Pex29p; PEX30 has a paralog, PEX…	2224.89	-0.0647786	0.1218	0.382202
YIL132C	CSM2	9	99860	100501	C		Component of Shu complex (aka PCSS complex); Shu complex also includes Psy3, Shu1, Shu2, and promotes error-free DNA repair,; Shu complex mediates inhibition of Srs2p function; promotes formation of Rad51p filaments; Psy3p and Csm2p contain similar DNA-binding regions which work together to form a single DNA binding site; required for accurate chromosome segregation during meiosis	222.761	-0.0647578	0.295558	0.601889
YMR093W	UTP15	13	454015	455556	W	snoRNA-binding rRNA-processing protein UTP15	Nucleolar protein; component of the small subunit (SSU) processome containing the U3 snoRNA that is involved in processing of pre-18S rRNA	6200.12	-0.0647563	0.063709	0.262452
YBR026C	ETR1	2	292877	294019	C	MRF1'|MRF1	2-enoyl thioester reductase; member of the medium chain dehydrogenase/reductase family; localized to mitochondria, where it has a probable role in fatty acid synthesis; human MECR functionally complements the respiratory growth defect of the null mutant	4370.34	-0.0646783	0.0554138	0.244186
YJR113C	RSM7	10	638232	638975	C	mitochondrial 37S ribosomal protein RSM7	Mitochondrial ribosomal protein of the small subunit; has similarity to E. coli S7 ribosomal protein	1588.47	-0.0645838	0.135816	0.407128
YJR019C	TES1	10	467232	468281	C	PTE1	Peroxisomal acyl-CoA thioesterase; likely to be involved in fatty acid oxidation rather than fatty acid synthesis; conserved protein also found in human peroxisomes; TES1 mRNA levels increase during growth on fatty acids	737.04	-0.0645725	0.225452	0.525934
YML125C	PGA3	13	20761	21699	C	cytochrome-b5 reductase|NQR1	Putative cytochrome b5 reductase, localized to the plasma membrane; may be involved in regulation of lifespan; required for maturation of Gas1p and Pho8p, proposed to be involved in protein trafficking; PGA3 has a paralog, AIM33, that arose from the whole genome duplication	9250.78	-0.0645626	0.0898584	0.322202
YNL246W	VPS75	14	185460	186349	W		NAP family histone chaperone; binds to histones and Rtt109p, stimulating histone acetyltransferase activity; possesses nucleosome assembly activity in vitro; proposed role in vacuolar protein sorting and in double-strand break repair; protein abundance increases in response to DNA replication stress; relocalizes to the cytosol in response to hypoxia	2495.88	-0.0645446	0.0834763	0.30815
YBR098W	MMS4	2	441515	443590	W	YBR100W|SLX2	Subunit of structure-specific Mms4p-Mus81p endonuclease; cleaves branched DNA; involved in recombination, DNA repair, and joint molecule formation/resolution during meiotic recombination; phosphorylation of the non-catalytic subunit Mms4p by Cdc28p and Cdc5p during mitotic cell cycle activates the function of Mms4p-Mus81p	768.579	-0.0644873	0.138734	0.412327
YDR148C	KGD2	4	753675	755066	C	alpha-ketoglutarate dehydrogenase KGD2	Dihydrolipoyl transsuccinylase; component of the mitochondrial alpha-ketoglutarate dehydrogenase complex, which catalyzes the oxidative decarboxylation of alpha-ketoglutarate to succinyl-CoA in the TCA cycle; phosphorylated	5454.36	-0.0644476	0.113743	0.368783
YLR175W	CBF5	12	506134	507585	W	pseudouridine synthase CBF5	Pseudouridine synthase catalytic subunit of box H/ACA snoRNPs; acts on large and small rRNAs, on snRNA U2, and on some mRNAs; mutations in human ortholog dyskerin cause the disorder dyskeratosis congenita; small nucleolar ribonucleoprotein particles are also known as snoRNPs	33195.5	-0.0643169	0.00837584	0.0735923
YOL040C	RPS15	15	253149	253577	C	uS19|ribosomal 40S subunit protein S15|S19|rp52|S21|S15|RPS21	Protein component of the small (40S) ribosomal subunit; homologous to mammalian ribosomal protein S15 and bacterial S19	50122.6	-0.0642949	0.110514	0.361986
YGL023C	PIB2	7	450197	452104	C		Protein of unknown function; contains FYVE domain; similar to Fab1 and Vps27	3718.65	-0.0642741	0.0472795	0.223945
YLR065C	ENV10	12	266373	266918	C	SND2	Protein involved in SRP-independent targeting of substrates to the ER; component of an alternative ER targeting pathway that has partial functional redundancy with the GET pathway; preference for substrates with downstream transmembrane domains; interacts with Snd1p, Pho88p/Snd3p, and Sec61p-translocon subunits; can compensate for loss of SRP; role in the late endosome-vacuole interface; putative…	3142.09	-0.064093	0.054105	0.24076
YIL154C	IMP2'	9	53981	55021	C	IMP2	Transcriptional activator involved in maintenance of ion homeostasis; also involved in protection against DNA damage caused by bleomycin and other oxidants; contains a C-terminal leucine-rich repeat	2106.58	-0.0640536	0.145198	0.419468
YML052W	SUR7	13	170402	171310	W		Plasma membrane protein, component of eisosomes; long-lived protein that remains stable in eisosomes of mother cells while other eisosome proteins, Pil1p and Lsp1p, turn over; may function to anchor the eisosome in place; sporulation and plasma membrane sphingolipid content are altered in mutants; localizes to furrow-like invaginations (MCC patches)	6570.06	-0.0639976	0.0304571	0.171737
YPL010W	RET3	16	535018	535587	W	coatomer subunit zeta	Zeta subunit of the coatomer complex (COPI); COPI coats Golgi-derived transport vesicles; involved in retrograde transport between Golgi and ER	4739.7	-0.0639669	0.0830857	0.307723
YPL263C	KEL3	16	44551	46506	C		Cytoplasmic protein of unknown function	9707.51	-0.0639321	0.0267469	0.158331
YOL136C	PFK27	15	67561	68754	C	6-phosphofructo-2-kinase|PFK-2	6-phosphofructo-2-kinase; catalyzes synthesis of fructose-2,6-bisphosphate; inhibited by phosphoenolpyruvate and sn-glycerol 3-phosphate, expression induced by glucose and sucrose, transcriptional regulation involves protein kinase A	4520.95	-0.0638607	0.057612	0.249666
YDR465C	RMT2	4	1393336	1394574	C	protein-arginine N5-methyltransferase	Arginine N5 methyltransferase; methylates ribosomal protein Rpl12 (L12) on Arg67; relative distribution to the nucleus increases upon DNA replication stress	6762.37	-0.0638469	0.0612427	0.256822
YGR187C	HGH1	7	870232	871416	C		Nonessential protein of unknown function; predicted to be involved in ribosome biogenesis; green fluorescent protein (GFP)-fusion protein localizes to the cytoplasm; similar to mammalian BRP16 (Brain protein 16); relative distribution to the nucleus increases upon DNA replication stress	6548.28	-0.0638221	0.063215	0.261576
YMR120C	ADE17	13	507502	509280	C	bifunctional phosphoribosylaminoimidazolecarboxamide formyltransferase/IMP cyclohydrolase ADE17	Enzyme of 'de novo' purine biosynthesis; contains both 5-aminoimidazole-4-carboxamide ribonucleotide transformylase and inosine monophosphate cyclohydrolase activities; ADE17 has a paralog, ADE16, that arose from the whole genome duplication; ade16 ade17 mutants require adenine and histidine	8877.6	-0.063808	0.0693932	0.277105
YPL079W	RPL21B	16	406636	407539	W	eL21|ribosomal 60S subunit protein L21B|L21e|L21B	Ribosomal 60S subunit protein L21B; homologous to mammalian ribosomal protein L21, no bacterial homolog; RPL21B has a paralog, RPL21A, that arose from the whole genome duplication	36594.5	-0.0637833	0.104539	0.35139
YKL101W	HSL1	11	248920	253476	W	protein kinase HSL1|ELM2|NIK1	Nim1p-related protein kinase; septin-binding kinase that localizes to the bud neck septin ring and regulates the morphogenesis checkpoint; phosphorylates Hsl7p and cooperates with Elm1p to recruit Hsl7p to the mother-bud neck, as a prerequisite for the subsequent recruitment, phosphorylation, and degradation of Swe1p; autophosphorylation enhances interactions with Hsl7p	8545.02	-0.063775	0.127711	0.39136
YOL066C	RIB2	15	202696	204471	C	bifunctional DRAP deaminase/tRNA pseudouridine synthase RIB2|PUS8	Bifunctional DRAP deaminase tRNA:pseudouridine synthase; the deaminase catalyzes the third step in riboflavin biosynthesis and the synthase catalyzes formation of pseudouridine at position 32 in cytoplasmic tRNAs; RIB2 has a paralog, PUS9, that arose from the whole genome duplication	2203.99	-0.0635991	0.0886052	0.319901
YJR002W	MPP10	10	438865	440646	W	rRNA-processing protein MPP10	Component of the SSU processome and 90S preribosome; required for pre-18S rRNA processing, interacts with and controls the stability of Imp3p and Imp4p, essential for viability; similar to human Mpp10p	10167.9	-0.0635894	0.0294582	0.167896
YLR017W	MEU1	12	177608	178621	W	S-methyl-5-thioadenosine phosphorylase	Methylthioadenosine phosphorylase (MTAP); catalyzes the initial step in the methionine salvage pathway; affects polyamine biosynthesis through regulation of ornithine decarboxylase (Spe1p) activity; regulates ADH2 gene expression	6864.76	-0.06348	0.117674	0.374564
YOR059C	LPL1	15	438906	440258	C	putative hydrolase|YOR29-10	Phospholipase; contains lipase specific GXSXG motif; maintains lipid droplet (LD) morphology; induced by transcription factor Rpn4p; protein abundance increases in response to DNA replication stress	1910.58	-0.0634398	0.097793	0.340021
YOR384W	FRE5	15	1061564	1063648	W	putative ferric-chelate reductase	Putative ferric reductase with similarity to Fre2p; expression induced by low iron levels; the authentic, non-tagged protein is detected in highly purified mitochondria in high-throughput studies	22.4366	-0.0633386	0.21028	0.509916
YDR534C	FIT1	4	1503314	1504900	C		Mannoprotein that is incorporated into the cell wall; incorporated via a glycosylphosphatidylinositol (GPI) anchor; involved in the retention of siderophore-iron in the cell wall	165.459	-0.0632366	0.321267	0.628661
YFR034C	PHO4	6	225020	225958	C	phosphate-sensing transcription factor PHO4|phoD	Basic helix-loop-helix (bHLH) transcription factor of the myc-family; activates transcription cooperatively with Pho2p in response to phosphate limitation; binding to 'CACGTG' motif is regulated by chromatin restriction, competitive binding of Cbf1p to the same DNA binding motif and cooperation with Pho2p; function is regulated by phosphorylation at multiple sites and by phosphate availability	2224.83	-0.0631866	0.101208	0.345722
YJL062W-A	COA3	10	316723	316980	W	COX25|RRG10	Mitochondrial protein required for cytochrome c oxidase assembly; also involved in translational regulation of Cox1p and prevention of Cox1p aggregation before assembly; located in the mitochondrial inner membrane	670.839	-0.0631822	0.255118	0.558253
YER126C	NSA2	5	413394	414179	C	rRNA-processing protein NSA2	Protein constituent of 66S pre-ribosomal particles; contributes to processing of the 27S pre-rRNA; recruited by ribosomal proteins L17, L35, and L37 to assembling ribosomes after 27SB pre-rRNA is generated, immediately preceding removal of ITS2	6479.46	-0.063104	0.13878	0.412327
YER060W	FCY21	5	274567	276153	W	purine-cytosine permease	Putative purine-cytosine permease; very similar to Fcy2p but cannot substitute for its function	1596.22	-0.0630369	0.109587	0.360386
YGR132C	PHB1	7	755589	756452	C	prohibitin subunit PHB1	Subunit of the prohibitin complex (Phb1p-Phb2p); prohibitin is a 1.2 MDa ring-shaped inner mitochondrial membrane chaperone that stabilizes newly synthesized proteins; determinant of replicative life span; involved in mitochondrial segregation; prohibitin deficiency induces a mitochondrial unfolded protein response (mtUPR)	5723.04	-0.0629768	0.0925049	0.328621
YDR376W	ARH1	4	1226822	1228303	W	NADPH-adrenodoxin reductase	Oxidoreductase of the mitochondrial inner membrane; involved in cytoplasmic and mitochondrial iron homeostasis and required for activity of Fe-S cluster-containing enzymes; one of the few mitochondrial proteins essential for viability	2394.46	-0.0629233	0.0502265	0.230322
YGR182C	YGR182C	7	858551	858904	C		Dubious open reading frame; unlikely to encode a functional protein, based on available experimental and comparative sequence data; partially overlaps the verified ORF TIM13/YGR181W	67.7991	-0.0626843	0.316874	0.62431
YNL249C	MPA43	14	179394	181022	C		Protein of unknown function; the authentic, non-tagged protein is detected in highly purified mitochondria in high-throughput studies	820.884	-0.0626351	0.155739	0.433999
YPL039W	YPL039W	16	479225	480175	W		Putative protein of unknown function; YPL039W is not an essential gene	1117.96	-0.0625784	0.132984	0.402377
YPR133C	SPN1	16	795978	797210	C	IWS1	Protein involved in RNA polymerase II transcription; is constitutively recruited to the CYC1 promoter and is required for recruitment of chromatin remodeling factors for the expression of CYC1 gene; interacts genetically or physically with RNAP II, TBP, TFIIS, and chromatin remodelling factors; central domain highly conserved throughout eukaryotes; mutations confer an Spt- phenotype	5285.71	-0.0625568	0.0596988	0.255248
YER107C	GLE2	5	373448	374545	C	RNA export factor GLE2|RAE1	RNA export factor associated with the nuclear pore complex (NPC); associates with NUP116p; required for polyadenylated RNA export but not for protein import; homologous to S. pombe Rae1p and human RAE1	3891.74	-0.062535	0.0260609	0.155992
YBR265W	TSC10	2	738582	739544	W	3-dehydrosphinganine reductase	3-ketosphinganine reductase; catalyzes the second step in phytosphingosine synthesis; essential for growth in the absence of exogenous dihydrosphingosine or phytosphingosine; localized to lipid droplets; member of short chain dehydrogenase/reductase protein family	2747	-0.0623978	0.0598273	0.255248
YML026C	RPS18B	13	222987	223828	C	uS13|ribosomal 40S subunit protein S18B|S18B|S13	Protein component of the small (40S) ribosomal subunit; homologous to mammalian ribosomal protein S18 and bacterial S13; RPS18B has a paralog, RPS18A, that arose from the whole genome duplication; protein abundance increases in response to DNA replication stress	45489.8	-0.0623466	0.17384	0.462741
YGR033C	TIM21	7	554248	554967	C	FMP17	Nonessential component of the TIM23 complex; interacts with the Translocase of the Outer Mitochondrial membrane (TOM complex) and with respiratory enzymes; may regulate the Translocase of the Inner Mitochondrial membrane (TIM23 complex) activity	3148.81	-0.0623434	0.0520573	0.234055
YKR092C	SRP40	11	612665	613885	C		Nucleolar serine-rich protein; role in preribosome assembly or transport; may function as a chaperone of small nucleolar ribonucleoprotein particles (snoRNPs); immunologically and structurally to rat Nopp140	11697.1	-0.0621742	0.0773309	0.296891
YKL027W	TCD2	11	387562	388905	W	tRNA threonylcarbamoyladenosine dehydratase	tRNA threonylcarbamoyladenosine dehydratase; required for the ct6A tRNA base modification, where an adenosine at position 37 is modified to form a cyclized active ester with an oxazolone ring; localized to the mitochondrial outer membrane; TCD2 has a paralog, TCD1, that arose from the whole genome duplication	3703.62	-0.0620838	0.0791358	0.301407
YGL256W	ADH4	7	15159	16307	W	alcohol dehydrogenase ADH4|ZRG5|NRC465	Alcohol dehydrogenase isoenzyme type IV; dimeric enzyme demonstrated to be zinc-dependent despite sequence similarity to iron-activated alcohol dehydrogenases; transcription is induced in response to zinc deficiency	3411.51	-0.0620162	0.0651236	0.266183
YDR265W	PEX10	4	998864	999877	W	ubiquitin-protein ligase peroxin 10|PAS4	Peroxisomal membrane E3 ubiquitin ligase; required for for Ubc4p-dependent Pex5p ubiquitination and peroxisomal matrix protein import; contains zinc-binding RING domain; mutations in human homolog cause various peroxisomal disorders	811.569	-0.0619632	0.151124	0.42837
YKL062W	MSN4	11	323228	325120	W	stress-responsive transcriptional activator MSN4	Stress-responsive transcriptional activator; activated in stochastic pulses of nuclear localization in response to various stress conditions; binds DNA at stress response elements of responsive genes, inducing gene expression; involved in diauxic shift	2428.95	-0.061915	0.0981366	0.340021
YKR088C	TVP38	11	604405	605418	C		Integral membrane protein; localized to late Golgi vesicles along with the v-SNARE Tlg2p; required for asymmetric localization of Kar9p during mitosis; GFP-fusion protein localizes to the cytoplasm in a punctate pattern	2762.02	-0.0618641	0.117383	0.374377
YCR096C	HMRA2	3	293179	293538	C	homeodomain mating type protein a2|A2	Silenced copy of a2 at HMR; similarity to Alpha2p; required along with a1p for inhibiting expression of the HO endonuclease in a/alpha HO/HO diploid cells with an active mating-type interconversion system	244.851	-0.0618357	0.335454	0.641413
YGL213C	SKI8	7	90054	91247	C	SKI complex subunit WD repeat protein SKI8|REC103	Ski complex component and WD-repeat protein; mediates 3'-5' RNA degradation by the cytoplasmic exosome; also required for meiotic double-strand break recombination; null mutants have superkiller phenotype	3613.29	-0.0618213	0.0863898	0.316067
YDR489W	SLD5	4	1431012	1431896	W	DNA replication protein SLD5|CDC105	Subunit of the GINS complex (Sld5p, Psf1p, Psf2p, Psf3p); complex is localized to DNA replication origins and implicated in assembly of the DNA replication machinery	786.765	-0.0617791	0.154728	0.432886
YGL257C	MNT2	7	12481	14157	C	alpha-1,3-mannosyltransferase MNT2	Mannosyltransferase; involved in adding the 4th and 5th mannose residues of O-linked glycans	4012.72	-0.0617433	0.035891	0.190327
YLR200W	YKE2	12	549012	549356	W	tubulin-binding prefolding complex subunit YKE2|PFD6|GIM1	Subunit of the heterohexameric Gim/prefoldin protein complex; involved in the folding of alpha-tubulin, beta-tubulin, and actin; prefoldin complex also localizes to chromatin of actively transcribed genes in the nucleus and facilitates transcriptional elongation	1727.69	-0.0617376	0.105283	0.351885
YDR315C	IPK1	4	1092741	1093586	C	inositol pentakisphosphate 2-kinase|GSL1	Inositol 1,3,4,5,6-pentakisphosphate 2-kinase; nuclear protein required for synthesis of 1,2,3,4,5,6-hexakisphosphate (phytate), which is integral to cell function; has 2 motifs conserved in other fungi; ipk1 gle1 double mutant is inviable; human IPPK can complement ipk1 null mutant	578.335	-0.0617322	0.204575	0.503252
YLR209C	PNP1	12	560797	561732	C	purine-nucleoside phosphorylase	Purine nucleoside phosphorylase; specifically metabolizes inosine and guanosine nucleosides; involved in the nicotinamide riboside salvage pathway	2019.59	-0.0617286	0.0771777	0.2965
YGR216C	GPI1	7	922633	924462	C	phosphatidylinositol N-acetylglucosaminyltransferase	Membrane protein involved in the synthesis of GlcNAc-PI; N-acetylglucosaminyl phosphatidylinositol (GlcNAc-PI) is the first intermediate in the synthesis of glycosylphosphatidylinositol (GPI) anchors; human and mouse GPI1p are functional homologs	2308.82	-0.0616297	0.0892336	0.320962
YLR078C	BOS1	12	285736	286559	C	SEC32	v-SNARE (vesicle specific SNAP receptor); localized to the endoplasmic reticulum membrane and necessary for vesicular transport from the ER to the Golgi; required for efficient nuclear fusion during mating	1952.14	-0.0616266	0.0574034	0.24957
YCR036W	RBK1	3	193297	194298	W	putative ribokinase	Putative ribokinase	3064.19	-0.0615685	0.0315993	0.174973
YLL034C	RIX7	12	70633	73146	C	putative AAA family ATPase RIX7	Putative ATPase of the AAA family; required for export of pre-ribosomal large subunits from the nucleus; distributed between the nucleolus, nucleoplasm, and nuclear periphery depending on growth conditions	8398.08	-0.0613649	0.0461828	0.221117
YNL280C	ERG24	14	109095	110411	C	delta(14)-sterol reductase	C-14 sterol reductase; acts in ergosterol biosynthesis; mutants accumulate the abnormal sterol ignosterol (ergosta-8,14 dienol), and are viable under anaerobic growth conditions but inviable on rich medium under aerobic conditions	6121.84	-0.0612416	0.0489439	0.226972
YBR037C	SCO1	2	310565	311452	C	Cu-binding protein SCO1|PET161	Copper-binding protein of mitochondrial inner membrane; required for cytochrome c oxidase activity and respiration; may function to deliver copper to cytochrome c oxidase; similar to thioredoxins; SCO1 has a paralog, SCO2, that arose from the whole genome duplication	746.504	-0.0611893	0.213746	0.513187
YPL093W	NOG1	16	370978	372921	W	putative GTPase NOG1	Putative GTPase; associates with free 60S ribosomal subunits in the nucleolus and is required for 60S ribosomal subunit biogenesis; constituent of 66S pre-ribosomal particles; member of the ODN family of nucleolar G-proteins	23050.9	-0.0611818	0.0861508	0.315795
YKR070W	YKR070W	11	573574	574632	W		Putative protein of unknown function; the authentic, non-tagged protein is detected in highly purified mitochondria in high-throughput studies	2821.88	-0.0610808	0.110268	0.361386
YDR499W	LCD1	4	1447830	1450073	W	PIE1|DDC2	Essential protein required for the DNA integrity checkpoint pathways; interacts physically with Mec1p; putative homolog of S. pombe Rad26 and human ATRIP; forms nuclear foci upon DNA replication stress	1821.81	-0.0610024	0.104036	0.350749
YER036C	ARB1	5	223367	225199	C	ATP-binding cassette family ATPase ARB1	ATPase of the ATP-binding cassette (ABC) family; involved in 40S and 60S ribosome biogenesis, has similarity to Gcn20p; shuttles from nucleus to cytoplasm, physically interacts with Tif6p, Lsg1p; human homolog ABCF2 can complement yeast ARB1 mutant	34041.9	-0.0608902	0.0274858	0.16108
YNR012W	URK1	14	647432	648937	W	uridine kinase URK1	Uridine/cytidine kinase; component of the pyrimidine ribonucleotide salvage pathway that converts uridine into UMP and cytidine into CMP; involved in the pyrimidine deoxyribonucleotide salvage pathway, converting deoxycytidine into dCMP	4238.64	-0.0608595	0.0428472	0.211908
YPL206C	PGC1	16	162632	163597	C	phosphatidylglycerol phospholipase	Phosphatidylglycerol phospholipase C; regulates phosphatidylglycerol (PG) accumulation via a phospholipase C-type degradation mechanism; PG levels affect mitochondrial function; contains glycerophosphodiester phosphodiesterase motifs	3517.99	-0.0608117	0.115258	0.37202
YCL008C	STP22	3	105696	106853	C	ubiquitin-binding ESCRT-I subunit protein STP22|AGS1|VPL15|VPS23	Component of the ESCRT-I complex; ESCRT-I is involved in ubiquitin-dependent sorting of proteins into the endosome; prevents polyubiquitination of the arrestin-related protein Rim8p, thereby directing its monoubiquitination by Rsp5p; homologous to the mouse and human Tsg101 tumor susceptibility gene; mutants exhibit a Class E Vps phenotype;	1370.62	-0.0606901	0.153951	0.4324
YOL026C	MIM1	15	274012	274353	C	TOM13	Mitochondrial protein required for outer membrane protein import; cooperates with Tom70p to import the subset of proteins with multiple alpha-helical transmembrane segments, including Ugo1p, Tom20p, and others; present in a complex with Mim2p in the outer membrane that may create a local environment to facilitate membrane insertion of substrate proteins; also has a role in assembly of Tom20p into…	1015.94	-0.0606492	0.226444	0.526753
YJR112W-A	YJR112W-A	10	637790	638168	W		Putative protein of unknown function; SWAT-GFP and mCherry fusion proteins localize to the endoplasmic reticulum; identified based on homology to <i>Ashbya gossypii</i>	485.606	-0.0605567	0.234468	0.536949
YMR090W	YMR090W	13	449245	449928	W		Putative protein of unknown function; similar to DTDP-glucose 4,6-dehydratases; GFP-fusion protein localizes to the cytoplasm; up-regulated in response to the fungicide mancozeb; not essential for viability	900.659	-0.0604947	0.24544	0.548441
YGL025C	PGD1	7	448764	449957	C	MED3|HRS1	Subunit of the RNA polymerase II mediator complex; associates with core polymerase subunits to form the RNA polymerase II holoenzyme; essential for basal and activated transcription; direct target of Cyc8p-Tup1p transcriptional corepressor	1088.51	-0.060456	0.179647	0.468661
YJL194W	CDC6	10	69338	70879	W	AAA family ATPase CDC6	Essential ATP-binding protein required for DNA replication; component of the pre-replicative complex (pre-RC) which requires ORC to associate with chromatin and is in turn required for Mcm2-7p DNA association; homologous to S. pombe Cdc18p; relocalizes from nucleus to cytoplasm upon DNA replication stress; degraded in response to plasma membrane stress	632.17	-0.0603316	0.302085	0.607017
YMR026C	PEX12	13	324236	325435	C	ubiquitin-protein ligase peroxin 12|PAS11	C3HC4-type RING-finger peroxin and E3 ubiquitin ligase; required for peroxisome biogenesis and peroxisomal matrix protein import; forms translocation subcomplex with Pex2p and Pex10p; mutations in human homolog cause peroxisomal disorder	1854.76	-0.0603179	0.0893358	0.321043
YIL028W	YIL028W	9	302100	302498	W		Dubious open reading frame; unlikely to encode a functional protein, based on available experimental and comparative sequence data	59.0296	-0.0602599	0.338404	0.643382
YKL191W	DPH2	11	81035	82639	W		Protein required for synthesis of diphthamide; required along with Dph1p, Kti11p, Jjj3p, and Dph5p; diphthamide is a modified histidine residue of translation elongation factor 2 (Eft1p or Eft2p); may act in a complex with Dph1p and Kti11p	7334.7	-0.0602382	0.0705735	0.280491
YGR264C	MES1	7	1019598	1021853	C	methionine--tRNA ligase MES1|MetRS|MESI	Methionyl-tRNA synthetase; forms a complex with glutamyl-tRNA synthetase (Gus1p) and Arc1p, which increases the catalytic efficiency of both tRNA synthetases; also has a role in nuclear export of tRNAs; mutations in human ortholog MARS are associated with pediatric pulmonary alveolar proteinosis	26853.3	-0.0602218	0.0361406	0.190985
YLR234W	TOP3	12	609783	611753	W	DNA topoisomerase 3|EDR1	DNA Topoisomerase III; conserved protein that functions in a complex with Sgs1p and Rmi1p to relax single-stranded negatively-supercoiled DNA preferentially; DNA catenation/decatenation activity is stimulated by RPA and Sgs1p-Top3p-Rmi1p; involved in telomere stability and regulation of mitotic recombination	389.382	-0.0602002	0.283333	0.587162
YKR077W	MSA2	11	583653	584744	W		Putative transcriptional activator; interacts with G1-specific transcription factor MBF and G1-specific promoters; MSA2 has a paralog, MSA1, that arose from the whole genome duplication	936.46	-0.0601279	0.254178	0.556831
YGR199W	PMT6	7	897502	899781	W	dolichyl-phosphate-mannose-protein mannosyltransferase PMT6	Protein O-mannosyltransferase; transfers mannose from dolichyl phosphate-D-mannose to protein serine/threonine residues of secretory proteins; reaction is essential for cell wall rigidity; member of a family of mannosyltransferases	3990.28	-0.0600736	0.0549381	0.242461
YAL053W	FLC2	1	45899	48250	W	flavin adenine dinucleotide transporter FLC2|HUF2	Putative calcium channel involved in calcium release under hypotonic stress; required for uptake of FAD into endoplasmic reticulum; involved in cell wall maintenance; FLC2 has a paralog, YOR365C, that arose from the whole genome duplication	6662.93	-0.0600615	0.0244594	0.151196
YBL015W	ACH1	2	194122	195702	W	acetyl-CoA hydrolase	Protein with CoA transferase activity; particularly for CoASH transfer from succinyl-CoA to acetate; has minor acetyl-CoA-hydrolase activity; phosphorylated; required for acetate utilization and for diploid pseudohyphal growth	1613.61	-0.0600167	0.213842	0.513203
YGL100W	SEH1	7	313234	314283	W		Subunit of the Nup84 nuclear pore and SEACAT subcomplexes; involved in nucleocytoplasmic transport and NPC biogenesis in the nuclear pore subcomplex; subunit of SEACAT, a subcomplex of the SEA complex that inhibits the TORC1 inhibitory role of SEACIT (Iml1p-Npr2p-Npr3p), a GAP for Gtr1p in response to amino acid limitation, thereby resulting in activation of TORC1 signaling; SEA is a coatomer-rel…	4751.78	-0.0598741	0.0492901	0.228091
YDR449C	UTP6	4	1357580	1358902	C	snoRNA-binding rRNA-processing protein UTP6	Nucleolar protein; component of the small subunit (SSU) processome containing the U3 snoRNA that is involved in processing of pre-18S rRNA	5171.29	-0.0598573	0.147785	0.422926
YPR083W	MDM36	16	704854	706593	W		Mitochondrial protein; required for normal mitochondrial morphology and inheritance; component of the mitochondria-ER-cortex-ancor (MECA); interacts with Num1p to link the ER and mitochondria at the cell cortex; proposed involvement in the formation of Dnm1p and Num1p-containing cortical anchor complexes that promote mitochondrial fission	1227.51	-0.059832	0.19038	0.486733
YOL139C	CDC33	15	60383	61024	C	translation initiation factor eIF4E|eIF4E|TIF45	mRNA cap binding protein and translation initiation factor eIF4E; the eIF4E-cap complex is responsible for mediating cap-dependent mRNA translation via interactions with translation initiation factor eIF4G (Tif4631p or Tif4632p); protein abundance increases in response to DNA replication stress; mutants are defective for adhesion and pseudohyphal growth; human homolog EIF4E can complement yeast c…	20901.8	-0.0598016	0.0652025	0.266317
YBL099W	ATP1	2	37053	38690	W	F1F0 ATP synthase subunit alpha	Alpha subunit of the F1 sector of mitochondrial F1F0 ATP synthase; which is a large, evolutionarily conserved enzyme complex required for ATP synthesis; F1 translationally regulates ATP6 and ATP8 expression to achieve a balanced output of ATP synthase genes encoded in nucleus and mitochondria; phosphorylated; N-terminally propionylated in vivo	17641.8	-0.0597245	0.174089	0.462978
YLR360W	VPS38	12	846103	847422	W	VPL17	Part of a Vps34p phosphatidylinositol 3-kinase complex; functions in carboxypeptidase Y (CPY) sorting; binds Vps30p and Vps34p to promote production of phosphatidylinositol 3-phosphate (PtdIns3P) which stimulates kinase activity; required for overflow degradation of misfolded proteins when ERAD is saturated	1451.51	-0.0596882	0.129496	0.39473
YMR234W	RNH1	13	740266	741312	W	RNA-DNA hybrid ribonuclease	Ribonuclease H1; able to bind double-stranded RNAs and RNA-DNA hybrids; associates with RNAse polymerase I.	1781.47	-0.0596744	0.115655	0.372088
YLR328W	NMA1	12	784913	786118	W	nicotinamide-nucleotide adenylyltransferase NMA1	Nicotinic acid mononucleotide adenylyltransferase; catalyzes the transfer of the adenylyl moiety of ATP to nicotinamide mononucleotide to form NAD; involved in pathways of NAD biosynthesis, including the de novo, NAD(+) salvage, and nicotinamide riboside salvage pathways; homolog of human NMNAT; NMA1 has a paralog, NMA2, that arose from the whole genome duplication	3263.35	-0.0595897	0.0847124	0.311315
YAL058W	CNE1	1	37464	38972	W	calnexin|FUN48	Calnexin; integral membrane ER chaperone involved in folding and quality control of glycoproteins; chaperone activity is inhibited by Mpd1p, with which Cne1p interacts; 24% identical to mammalian calnexin; Ca+ binding not yet shown in yeast	2194.81	-0.059547	0.0619044	0.258534
YLR249W	YEF3	12	636780	639914	W	translation elongation factor EF-3|EF-3|eEF3|TEF3	Translation elongation factor 3; contains two ABC cassettes; binds and hydrolyzes ATP; YEF3 has a paralog, HEF3, that arose from the whole genome duplication	247322	-0.0595224	0.0302413	0.170962
YLR244C	MAP1	12	625168	626331	C	methionine aminopeptidase MAP1	Methionine aminopeptidase; catalyzes the cotranslational removal of N-terminal methionine from nascent polypeptides; function is partially redundant with that of Map2p	13077.6	-0.0594908	0.103106	0.349455
YLR336C	SGD1	12	799697	802396	C		Essential nuclear protein; required for biogenesis of the small ribosomal subunit; has a possible role in the osmoregulatory glycerol response; putative homolog of human NOM1 which is implicated in acute myeloid leukemia	5839.17	-0.059464	0.0669202	0.270473
YCL058W-A	ADF1	3	23584	23925	W		Transcriptional repressor encoded by the FYV5 antisense strand; negatively regulates transcription of FYV5 by binding to the promoter on the sense strand	898.497	-0.059257	0.273977	0.576092
YNR050C	LYS9	14	714048	715388	C	saccharopine dehydrogenase (NADP+, L-glutamate-forming)|LYS13	Saccharopine dehydrogenase (NADP+, L-glutamate-forming); catalyzes the formation of saccharopine from alpha-aminoadipate 6-semialdehyde, the seventh step in lysine biosynthesis pathway; exhibits genetic and physical interactions with TRM112	8391.94	-0.0592385	0.125914	0.38901
YLR076C	YLR076C	12	283185	283607	C		Dubious open reading frame; unlikely to encode a functional protein, based on available experimental and comparative sequence data; partially overlaps the essential gene RPL10 which encodes the ribosomal protein L10	10.743	-0.0592242	0.0894265	0.321054
YLR046C	YLR046C	12	238001	238813	C	RLA1	Putative membrane protein; member of the fungal lipid-translocating exporter (LTE) family of proteins; transcription is activated by paralogous transcription factors Yrm1p and Yrr1p along with genes involved in multidrug resistance; YLR046C has a paralog, RTA1, that arose from the whole genome duplication	502.39	-0.0591826	0.269359	0.57392
YER009W	NTF2	5	172115	172492	W	Ran GTPase-binding protein NTF2	Nuclear envelope protein; interacts with GDP-bound Gsp1p and with proteins of the nuclear pore to transport Gsp1p into the nucleus where it is an essential player in nucleocytoplasmic transport	10314.2	-0.0591675	0.156653	0.434687
YPR173C	VPS4	16	886524	887837	C	AAA family ATPase VPS4|DID6|VPT10|VPL4|GRD13|END13|CSC1	AAA-ATPase involved in multivesicular body (MVB) protein sorting; ATP-bound Vps4p localizes to endosomes and catalyzes ESCRT-III disassembly and membrane release; ATPase activity is activated by Vta1p; regulates cellular sterol metabolism	7359.76	-0.059155	0.0145188	0.108233
YBL025W	RRN10	2	171481	171918	W		Protein involved in promoting high level transcription of rDNA; subunit of UAF (upstream activation factor) for RNA polymerase I	408.55	-0.0590923	0.271265	0.574366
YPR153W	MAY24	16	833689	834245	W		Protein of unknown function	151.367	-0.059079	0.353096	0.654994
YIL040W	APQ12	9	277723	278139	W		Nuclear envelope/ER integral membrane protein; interacts and functions with Brr6p and Brl1p in lipid homeostasis; mutants are defective in nuclear pore complex biogenesis, nuclear envelope morphology, mRNA export from the nucleus and are sensitive to sterol biosynthesis inhibitors and membrane fluidizing agents; exhibits synthetic lethal genetic interactions with genes involved in lipid metabolism	1612.93	-0.0590405	0.108183	0.357197
YGR044C	RME1	7	582990	583892	C	CSP1	Zinc finger protein involved in control of meiosis; prevents meiosis by repressing IME1 expression and promotes mitosis by activating CLN2 expression; directly repressed by a1-alpha2 regulator; mediates cell type control of sporulation; relocalizes from nucleus to cytoplasm upon DNA replication stress	2805.75	-0.059029	0.182722	0.472823
YCR026C	NPP1	3	164111	166339	C	nucleotide diphosphatase/phosphodiesterase NPP1	Nucleotide pyrophosphatase/phosphodiesterase; mediates extracellular nucleotide phosphate hydrolysis along with Npp2p and Pho5p; activity and expression enhanced during conditions of phosphate starvation; involved in spore wall assembly; NPP1 has a paralog, NPP2, that arose from the whole genome duplication, and an npp1 npp2 double mutant exhibits reduced dityrosine fluorescence relative to the s…	3574.97	-0.0589513	0.0410316	0.207919
YIL104C	SHQ1	9	169982	171505	C	Hsp90 cochaperone SHQ1	Chaperone protein; required for the assembly of box H/ACA snoRNPs and thus for pre-rRNA processing; functions as an RNA mimic; forms a complex with Naf1p and interacts with H/ACA snoRNP components Nhp2p and Cbf5p; homology with known Hsp90p cochaperones; relocalizes to the cytosol in response to hypoxia	2546.04	-0.0589112	0.175689	0.464302
YDL095W	PMT1	4	287059	289512	W	dolichyl-phosphate-mannose-protein mannosyltransferase PMT1	Protein O-mannosyltransferase of the ER membrane; transfers mannose from dolichyl phosphate-D-mannose to protein serine and threonine residues; 1 of 7 related proteins involved in O-glycosylation which is essential for cell wall rigidity; involved in ER quality control; amino terminus faces cytoplasm, carboxyl terminus faces ER lumen	19936.6	-0.0588634	0.0502165	0.230322
YLR133W	CKI1	12	408445	410193	W	bifunctional choline kinase/ethanolamine kinase CKI1	Choline kinase; catalyzes the first step in phosphatidylcholine synthesis via the CDP-choline (Kennedy pathway); exhibits some ethanolamine kinase activity contributing to phosphatidylethanolamine synthesis via the CDP-ethanolamine pathway; CKI1 has a paralog, EKI1, that arose from the whole genome duplication	2267.58	-0.0588162	0.183205	0.473438
YDR069C	DOA4	4	584939	587719	C	ubiquitin-specific protease DOA4|UBP4|SSV7|NPI2|MUT4|DOS1	Ubiquitin hydrolase; deubiquitinates intralumenal vesicle (ILVs) cargo proteins; required for recycling ubiquitin from proteasome-bound ubiquitinated intermediates, acts at the late endosome/prevacuolar compartment to recover ubiquitin from ubiquitinated membrane proteins destined for the vacuole; DOA4 has a paralog, UBP5, that arose from the whole genome duplication	1554.16	-0.058767	0.163412	0.445474
YDR184C	ATC1	4	830629	831513	C	LIC4	Nuclear protein; possibly involved in regulation of cation stress responses and/or in the establishment of bipolar budding pattern; relative distribution to the nucleus decreases upon DNA replication stress	3341.13	-0.0586392	0.154634	0.432886
YOL055C	THI20	15	224420	226075	C	trifunctional hydroxymethylpyrimidine kinase/phosphomethylpyrimidine kinase/thiaminase	Trifunctional enzyme of thiamine biosynthesis, degradation and salvage; has hydroxymethylpyrimidine (HMP) kinase, HMP-phosphate (HMP-P) kinase and thiaminase activities; member of a gene family with THI21 and THI22; HMP and HMP-P kinase activity redundant with Thi21p	1466.93	-0.0586275	0.106009	0.353465
YDR076W	RAD55	4	598468	599688	W	putative DNA-dependent ATPase RAD55	Protein that stimulates strand exchange; stimulates strand exchange by stabilizing the binding of Rad51p to single-stranded DNA; involved in the recombinational repair of double-strand breaks in DNA during vegetative growth and meiosis; forms heterodimer with Rad57p	463.738	-0.0585934	0.298544	0.603345
YNL290W	RFC3	14	86218	87240	W	replication factor C subunit 3	Subunit of heteropentameric Replication factor C (RF-C); which is a DNA binding protein and ATPase that acts as a clamp loader of the proliferating cell nuclear antigen (PCNA) processivity factor for DNA polymerases delta and epsilon; relocalizes to the cytosol in response to hypoxia	3694.4	-0.0585343	0.110806	0.362606
YJL180C	ATP12	10	87583	88560	C	ATP synthase complex assembly protein ATP12	Assembly factor for F1 sector of mitochondrial F1F0 ATP synthase; conserved protein; required for assembly of alpha and beta subunits into F1 sector of mitochondrial F1F0 ATP synthase; human homolog ATPAF2 can complement yeast atp12 mutant; mutation of human homolog reduces active ATP synthase levels and is associated with the disorder ATPAF2 deficiency	1408.75	-0.0585241	0.116932	0.374064
YER007C-A	TMA20	5	166237	166885	C	RBF20	Protein of unknown function that associates with ribosomes; has a putative RNA binding domain; interacts with Tma22p; null mutant exhibits translation defects; has homology to human oncogene MCT-1; protein abundance increases in response to DNA replication stress	4780.36	-0.0585085	0.115526	0.372087
YGR191W	HIP1	7	880420	882231	W	histidine permease	High-affinity histidine permease; also involved in the transport of manganese ions	9635.92	-0.0585017	0.0187442	0.127058
YLL038C	ENT4	12	65775	66518	C		Protein of unknown function; contains an N-terminal epsin-like domain; proposed to be involved in the trafficking of Arn1p in the absence of ferrichrome	947.749	-0.0584898	0.168529	0.454067
YJL092W	SRS2	10	257423	260947	W	DNA helicase SRS2|HPR5|RADH1|RADH	DNA helicase and DNA-dependent ATPase; involved in DNA repair and checkpoint recovery, needed for proper timing of commitment to meiotic recombination and transition from Meiosis I to II; blocks trinucleotide repeat expansion; affects genome stability; disassembles Rad51p nucleoprotein filaments during meiotic recombination; stimulates activity of the Mus81p-Mms4p endonuclease, independently of S…	3237.23	-0.05845	0.158875	0.439086
YOR163W	DDP1	15	642741	643307	W	polyphosphatase DDP1	Polyphosphate phosphatase; hydrolyzes diphosphorylated inositol polyphosphates and diadenosine polyphosphates; high specificity for diadenosine hexa- and pentaphosphates; contains endopolyphosphatase activity with a high affinity for polyphosphates, an activity also observed for its human DIPP homologs; possesses mRNA decapping activity; nudix hydrolase family member; protein abundance increases …	1464.47	-0.0584088	0.161	0.442014
YAL025C	MAK16	1	100225	101145	C	ribosome biosynthesis protein MAK16	Essential nuclear protein; constituent of 66S pre-ribosomal particles; required for maturation of 25S and 5.8S rRNAs; required for maintenance of M1 satellite double-stranded RNA of the L-A virus	9998.15	-0.0583525	0.167436	0.451969
YKR036C	CAF4	11	508702	510633	C		WD40 repeat-containing protein associated with the CCR4-NOT complex; interacts in a Ccr4p-dependent manner with Ssn2p; also interacts with Fis1p, Mdv1p and Dnm1p and plays a role in mitochondrial fission; CAF4 has a paralog, MDV1, that arose from the whole genome duplication	3653.98	-0.0582108	0.0572366	0.249543
YIL109C	SEC24	9	157385	160165	C	COPII subunit SEC24|ANU1	Component of the Sec23p-Sec24p heterodimer of the COPII vesicle coat; required for cargo selection during vesicle formation in ER to Golgi transport; homologous to Sfb3p; SEC24 has a paralog, SFB2, that arose from the whole genome duplication	10045	-0.0581691	0.0798706	0.302206
YDR428C	BNA7	4	1323454	1324239	C	arylformamidase	Formylkynurenine formamidase; involved in the de novo biosynthesis of NAD from tryptophan via kynurenine	1239.85	-0.0581162	0.199998	0.499375
YHR089C	GAR1	8	282681	283298	C	H/ACA snoRNP pseudouridylase subunit GAR1	Protein component of the H/ACA snoRNP pseudouridylase complex; involved in the modification and cleavage of the 18S pre-rRNA	10646.9	-0.0581048	0.0515103	0.232869
YNL240C	NAR1	14	198502	199977	C		Subunit of the cytosolic iron-sulfur (FeS) protein assembly machinery; required for maturation of cytosolic and nuclear FeS proteins and for normal resistance to oxidative stress; deficiency results in shortened lifespan and sensitivity to paraquat; homologous to human Narf	2406.37	-0.0580726	0.112348	0.365702
YDL084W	SUB2	4	305237	306577	W	ATP-dependent RNA helicase SUB2	Component of the TREX complex required for nuclear mRNA export; member of the DEAD-box RNA helicase superfamily and is involved in early and late steps of spliceosome assembly; homolog of the human splicing factor hUAP56; relocalizes from nucleus to cytoplasm upon DNA replication stress	38616.3	-0.0580371	0.0846899	0.311315
YPR062W	FCY1	16	677165	677641	W	cytosine deaminase|yCD	Cytosine deaminase; zinc metalloenzyme that catalyzes the hydrolytic deamination of cytosine to uracil; of biomedical interest because it also catalyzes the deamination of 5-fluorocytosine (5FC) to form anticancer drug 5-fluorouracil (5FU)	7707.61	-0.058015	0.0573239	0.24957
YNL132W	KRE33	14	375321	378491	W	ribosome biosynthesis protein KRE33|RRA1	Protein required for biogenesis of the small ribosomal subunit; heterozygous mutant shows haploinsufficiency in K1 killer toxin resistance; essential gene; NAT10, the human homolog, implicated in several types of cancer and premature aging.	11441.2	-0.057969	0.0827031	0.307465
YOR150W	MRPL23	15	611999	612490	W	mitochondrial 54S ribosomal protein YmL23|YmL23	Mitochondrial ribosomal protein of the large subunit; localizes to vacuole in response to H2O2	1554.99	-0.0579441	0.118487	0.376321
YML068W	ITT1	13	137550	138944	W		Protein that modulates the efficiency of translation termination; interacts with translation release factors eRF1 (Sup45p) and eRF3 (Sup35p) in vitro, contains a zinc finger domain characteristic of the TRIAD class of proteins	1135.35	-0.0579232	0.207517	0.507117
YLR203C	MSS51	12	550650	551960	C		Specific translational activator for the mitochondrial COX1 mRNA; loosely associated with the matrix face of the mitochondrial inner membrane; localizes to vacuole membrane in response to H2O2; influences both COX1 mRNA translation and Cox1p assembly into cytochrome c oxidase; binds to heme B, which may be a mechanism for sensing oxygen levels in order to regulate cytochrome c oxidase biogenesis	2905.26	-0.0578991	0.15469	0.432885
YIL076W	SEC28	9	216658	217548	W	coatomer subunit epsilon|ANU2	Epsilon-COP subunit of the coatomer; regulates retrograde Golgi-to-ER protein traffic; stabilizes Cop1p, the alpha-COP and the coatomer complex; non-essential for cell growth; protein abundance increases in response to DNA replication stress	7248.77	-0.0578824	0.101758	0.346313
YDR451C	YHP1	4	1361120	1362181	C		Homeobox transcriptional repressor; binds Mcm1p and early cell cycle box (ECB) elements of cell cycle regulated genes, thereby restricting ECB-mediated transcription to the M/G1 interval; YHP1 has a paralog, YOX1, that arose from the whole genome duplication	1656.31	-0.0578081	0.141748	0.415146
YNR029C	YNR029C	14	677199	678488	C		Putative protein of unknown function; deletion confers reduced fitness in saline	2839.04	-0.0577789	0.0842438	0.309989
YJL153C	INO1	10	134332	135933	C	inositol-3-phosphate synthase INO1|APR1	Inositol-3-phosphate synthase; involved in synthesis of inositol phosphates and inositol-containing phospholipids; transcription is coregulated with other phospholipid biosynthetic genes by Ino2p and Ino4p, which bind the UASINO DNA element	554.83	-0.057772	0.320277	0.628044
YBR191W	RPL21A	2	606270	607140	W	eL21|ribosomal 60S subunit protein L21A|L21e|L21A|URP1	Ribosomal 60S subunit protein L21A; homologous to mammalian ribosomal protein L21, no bacterial homolog; RPL21A has a paralog, RPL21B, that arose from the whole genome duplication	55035.4	-0.0577216	0.0418624	0.209337
YMR148W	OSW5	13	560366	560812	W		Protein of unknown function with possible role in spore wall assembly; predicted to contain an N-terminal transmembrane domain; osw5 null mutant spores exhibit increased spore wall permeability and sensitivity to beta-glucanase digestion	802.062	-0.057619	0.207961	0.507988
YDR240C	SNU56	4	943674	945152	C	MUD10	Component of U1 snRNP required for mRNA splicing via spliceosome; yeast specific, no metazoan counterpart; interacts with mRNA in commitment complex	1519	-0.0576145	0.137918	0.411039
YLR409C	UTP21	12	934414	937233	C	rRNA-processing protein UTP21	Subunit of U3-containing 90S preribosome and SSU processome complexes; involved in production of 18S rRNA and assembly of small ribosomal subunit; synthetic defect with STI1 Hsp90 cochaperone; human homolog linked to glaucoma; Small Subunit processome is also known as SSU processome	11626.8	-0.0576074	0.0511133	0.232535
YBR175W	SWD3	2	582408	583355	W	SAF35|CPS30	Essential subunit of the COMPASS (Set1C) complex; COMPASS methylates histone H3 on lysine 4 and is required in transcriptional silencing near telomeres; WD40 beta propeller superfamily member and ortholog of mammalian WDR5	1399.18	-0.0575765	0.151751	0.428394
YBR271W	EFM2	2	744852	746111	W	S-adenosylmethionine-dependent methyltransferase	S-adenosylmethionine-dependent methyltransferase; seven-beta-strand lysine methyltransferase which dimethylates translation elongation factor EF2 (Eft1p and Eft2p) at lysine 613 and methylates EF3 (Yef3p) at lysine 187; green fluorescent protein (GFP)-fusion protein localizes to the cytoplasm; involved in regulation of translational termination; predicted involvement in ribosome biogenesis	2729.93	-0.0575174	0.0726357	0.285532
YER133W-A	YER133W-A	5	437191	437532	W		Dubious open reading frame; unlikely to encode a functional protein, based on available experimental and comparative sequence data; partially overlaps ORF YER134C	6.24737	-0.0574997	0.0385074	0.199649
YPR184W	GDB1	16	902044	906654	W	bifunctional 4-alpha-glucanotransferase/amylo-alpha-1,6-glucosidase	Glycogen debranching enzyme; contains glucanotranferase and alpha-1,6-amyloglucosidase activities; required for glycogen degradation; phosphorylated in mitochondria; activity is inhibited by Igd1p; protein abundance increases in response to DNA replication stress	984.696	-0.0574979	0.22571	0.526107
YNL205C	YNL205C	14	258155	258577	C		Dubious open reading frame; unlikely to encode a functional protein, based on available experimental and comparative sequence data	29.8125	-0.0574426	0.300716	0.606171
YJL051W	IRC8	10	339787	342255	W		Bud tip localized protein of unknown function; mRNA is targeted to the bud by a She2p dependent transport system; mRNA is cell cycle regulated via Fkh2p, peaking in G2/M phase; null mutant displays increased levels of spontaneous Rad52p foc	1797.84	-0.057354	0.154648	0.432885
YHR031C	RRM3	8	170799	172970	C	RTT104	DNA helicase involved in rDNA replication and Ty1 transposition; binds to and suppresses DNA damage at G4 motifs in vivo; relieves replication fork pauses at telomeric regions; structurally and functionally related to Pif1p	2648.09	-0.0573468	0.0710218	0.281883
YBL035C	POL12	2	151493	153610	C	DNA-directed DNA polymerase alpha subunit POL12	B subunit of DNA polymerase alpha-primase complex; required for initiation of DNA replication during mitotic and premeiotic DNA synthesis; also functions in telomere capping and length regulation	1805.52	-0.0573035	0.175402	0.464302
YLR073C	RFU1	12	281019	281621	C		Protein that inhibits Doa4p deubiquitinating activity; contributes to ubiquitin homeostasis by regulating the conversion of free ubiquitin chains to ubiquitin monomers by Doa4p; GFP-fusion protein localizes to endosomes	1731.58	-0.0572261	0.238012	0.541435
YBL045C	COR1	2	134143	135516	C	ubiquinol--cytochrome-c reductase subunit COR1|QCR1	Core subunit of the ubiquinol-cytochrome c reductase complex; the ubiquinol-cytochrome c reductase complex (bc1 complex) is a component of the mitochondrial inner membrane electron transport chain	8199.96	-0.0571376	0.236448	0.539197
YLR313C	SPH1	12	760750	762342	C	YLR312C-B	Protein involved in shmoo formation and bipolar bud site selection; localizes to sites of polarized growth in a cell cycle dependent- and Spa2p-dependent manner, interacts with MAPKKs Mkk1p, Mkk2p, and Ste7p; SPH1 has a paralog, SPA2, that arose from the whole genome duplication	764.801	-0.0571361	0.239043	0.541435
YER038C	KRE29	5	226858	228252	C	Smc5-Smc6 complex subunit KRE29|NSE6	Subunit of the SMC5-SMC6 complex; this complex is involved in removal of X-shaped DNA structures that arise between sister chromatids during DNA replication and repair; heterozygous mutant shows haploinsufficiency in K1 killer toxin resistance	793.218	-0.0570762	0.176408	0.464893
YEL006W	YEA6	5	144327	145334	W	NAD+ transporter|NDT2	Putative mitochondrial NAD+ transporter; member of the mitochondrial carrier subfamily (see also YIA6); has putative human ortholog; YEA6 has a paralog, YIA6, that arose from the whole genome duplication	2084.08	-0.0570007	0.104189	0.350854
YAL022C	FUN26	1	108877	110430	C	nucleoside transmembrane transporter FUN26	High affinity, broad selectivity, nucleoside/nucleobase transporter; vacuolar membrane localized transporter which may regulate the balance of nicotinamide riboside (NmR) levels between the cytosol and vacuole, contributing to salvage of NmR for use in cytosolic NAD+ synthesis; equilibrative nucleoside transporter (ENT) family member	3878.89	-0.0569334	0.12655	0.390508
YGR200C	ELP2	7	899904	902270	C	Elongator subunit ELP2|KTI3|TOT2	Subunit of Elongator complex; binds to microtubules via conserved alkaline residues; has two seven-bladed WD40 &	10692.6	-0.0569226	0.0204321	0.134692
YJL024C	APS3	10	395931	396592	C	YKS7	Small subunit of the clathrin-associated adaptor complex AP-3; involved in vacuolar protein sorting; related to the sigma subunit of the mammalian clathrin AP-3 complex; suppressor of loss of casein kinase 1 function; protein abundance increases in response to DNA replication stress	1434.28	-0.0568864	0.137128	0.409322
YGR121C	MEP1	7	731449	732927	C	ammonium permease MEP1|AMT1	Ammonium permease; belongs to a ubiquitous family of cytoplasmic membrane proteins that transport only ammonium (NH4+); expression is under the nitrogen catabolite repression regulation; human homolog RHCG complements yeast null mutant; mutations in human homolog RHCG implicated in metabolic acidosis; MEP1 has a paralog, MEP3, that arose from the whole genome duplication	518.844	-0.056849	0.311646	0.617898
YOR099W	KTR1	15	511825	513006	W	alpha-1,2-mannosyltransferase KTR1	Alpha-1,2-mannosyltransferase; involved in O- and N-linked protein glycosylation; type II membrane protein; member of the KRE2/MNT1 mannosyltransferase family; relocalizes from vacuole to cytoplasm upon DNA replication stress	9262.39	-0.0567596	0.0481569	0.226055
YPL065W	VPS28	16	427927	428655	W	ESCRT-I subunit protein VPS28|VPL13|VPT28	Component of the ESCRT-I complex; complex is involved in ubiquitin-dependent sorting of proteins into the endosome; conserved C-terminal domain interacts with ESCRT-III subunit Vps20p; other members include Stp22p, Srn2p, Vps28p, and Mvb12p	952.412	-0.0567278	0.156473	0.434397
YPR166C	MRP2	16	876282	876629	C	mitochondrial 37S ribosomal protein MRP2	Mitochondrial ribosomal protein of the small subunit	798.93	-0.0567068	0.219122	0.519377
YHR170W	NMD3	8	443828	445384	W	ribosome-binding protein NMD3|SRC5	Protein involved in nuclear export of the large ribosomal subunit; acts as a Crm1p-dependent adapter protein for export of nascent ribosomal subunits through the nuclear pore complex	14899.9	-0.0566467	0.093911	0.331263
YHR204W	MNL1	8	506319	508709	W	alpha-1,2-mannosidase MNL1|HTM1	Alpha-1,2-specific exomannosidase of the endoplasmic reticulum; involved in glycan trimming of both folded and misfolded glycoproteins; complexes with Pdi1p, and trims a mannose from Man8GlcNac2 glycans to generate Man7GlcNac2, an oligosaccharide signal on glycoproteins destined for ER-associated protein degradation; requires Pdi1p for stability and substrate recognition; human homolog EDEM1 can …	3059.08	-0.0566449	0.173975	0.462887
YHR123W	EPT1	8	354815	356081	W	bifunctional diacylglycerol cholinephosphotransferase/ethanolaminephosphotransferase	sn-1,2-diacylglycerol ethanolamine- and cholinephosphotranferase; not essential for viability; EPT1 has a paralog, CPT1, that arose from the whole genome duplication	4625.71	-0.0566307	0.0607207	0.256193
YOL088C	MPD2	15	153912	154745	C	protein disulfide isomerase MPD2	Member of the protein disulfide isomerase (PDI) family; exhibits chaperone activity; overexpression suppresses the lethality of a pdi1 deletion but does not complement all Pdi1p functions; undergoes oxidation by Ero1p	2206.68	-0.0566096	0.0890159	0.32058
YJR142W	YJR142W	10	697141	698169	W		8-oxo-dGTP diphosphatase of the Nudix hydrolase family; converts diphosphates of damaged forms of thiamin to monophosphates; GST fusion protein is a Dbf2p-Mob1p phosphorylation target in a proteome chip analysis; synthetic lethal with PH085 deletion; plays a role in restricting Ty1 transposition	2621.44	-0.0565826	0.1053	0.351885
YDR352W	YPQ2	4	1181801	1182754	W		Putative vacuolar membrane transporter for cationic amino acids; likely contributes to amino acid homeostasis by exporting cationic amino acids from the vacuole; member of the PQ-loop family, with seven transmembrane domains; mutant phenotype is functionally complemented by rat PQLC2 vacuolar transporter	1953.56	-0.0565696	0.105367	0.351885
YFR026C	ULI1	6	205748	206257	C		Protein of unknown function; involved in and induced by the endoplasmic reticulum unfolded protein response (UPR); SWAT-GFP and mCherry fusion proteins localize to the endoplasmic reticulum	100.715	-0.0564697	0.385807	0.680316
YMR156C	TPP1	13	570300	571016	C	polynucleotide 3'-phosphatase	DNA 3'-phosphatase; functions in repair of endogenous damage of double-stranded DNA, activity is specific for removal of 3' phosphates at strand breaks; similar to the l-2-haloacid dehalogenase superfamily; homolog of human polynucleotide kinase/3'-phosphatase	431.31	-0.056467	0.272564	0.575635
YGR079W	YGR079W	7	640720	641832	W		Putative protein of unknown function; YGR079W is not an essential gene	3080.65	-0.0564576	0.380956	0.678352
YDL039C	PRM7	4	381985	384081	C	pheromone-regulated protein PRM7|YDL038C	Pheromone-regulated protein; predicted to have one transmembrane segment; promoter contains Gcn4p binding elements; in W303 strain one continuous open reading frame comprising of YDL037C, the intergenic region and YDL039C encodes the IMI1	4953.55	-0.0564183	0.379854	0.677217
YBL069W	AST1	2	90741	92030	W		Lipid raft associated protein; interacts with the plasma membrane ATPase Pma1p and has a role in its targeting to the plasma membrane by influencing its incorporation into lipid rafts; sometimes classified in the medium-chain dehydrogenase/reductases (MDRs) superfamily; AST1 has a paralog, AST2, that arose from the whole genome duplication	2344.51	-0.0564177	0.293123	0.598411
YLR189C	ATG26	12	530797	534393	C	UGT51	UDP-glucose:sterol glucosyltransferase; conserved enzyme involved in synthesis of sterol glucoside membrane lipids; in contrast to ATG26 from P. pastoris, S. cerevisiae ATG26 is not involved in autophagy	4590.88	-0.0564161	0.0756416	0.292644
YBR052C	RFS1	2	338720	339352	C	flavodoxin-like fold family protein	Protein of unknown function; member of a flavodoxin-like fold protein family that includes Pst2p and Ycp4p; green fluorescent protein (GFP)-fusion protein localizes to the cytoplasm in a punctate pattern; RFS1 has a paralog, PST2, that arose from the whole genome duplication	3554.77	-0.0563742	0.210721	0.510611
YML039W	NA	NA	NA	NA	NA	NA	NA	680.395	-0.0563735	0.275833	0.578083
YMR117C	SPC24	13	501250	501891	C	kinetochore-associated Ndc80 complex subunit SPC24	Component of the kinetochore-associated Ndc80 complex; involved in chromosome segregation, spindle checkpoint activity, and kinetochore clustering; evolutionarily conserved; other members include Ndc80p, Nuf2p, Spc24p, and Spc25p	475.568	-0.0563543	0.302566	0.60756
YJL094C	KHA1	10	251821	254442	C		Putative K+/H+ antiporter; has a probable role in intracellular cation homeostasis; localized to Golgi vesicles and detected in highly purified mitochondria in high-throughput studies	2727.31	-0.0562261	0.0821323	0.306024
YER006W	NUG1	5	162723	164285	W	RNA-binding GTPase NUG1	GTPase that associates with nuclear 60S pre-ribosomes; required for export of 60S ribosomal subunits from the nucleus	14633.1	-0.0561572	0.098307	0.340021
YPR163C	TIF3	16	868645	869955	C	eIF4B|STM1|RBL3	Translation initiation factor eIF-4B; contains an RNA recognition motif and binds to single-stranded RNA; has RNA annealing activity; interacts with Rps20p at the head of the 40S ribosomal subunit and alters the structure of the mRNA entry channel	29200.8	-0.0561301	0.0525905	0.235715
YOL060C	MAM3	15	214017	216137	C		Protein required for normal mitochondrial morphology; has similarity to hemolysins	3091.65	-0.0560844	0.204074	0.503252
YLR251W	SYM1	12	641464	642057	W	ethanol metabolism protein	Protein required for ethanol metabolism; induced by heat shock and localized to the inner mitochondrial membrane; homologous to mammalian peroxisomal membrane protein Mpv17; human homolog MPV17 is implicated in hepatocerebral mtDNA depletion syndromes (MDDS), and complements yeast null mutant	351.821	-0.0560458	0.319409	0.627177
YLR438W	CAR2	12	1012501	1013775	W	ornithine-oxo-acid transaminase|cargB	L-ornithine transaminase (OTAse); catalyzes the second step of arginine degradation, expression is dually-regulated by allophanate induction and a specific arginine induction process; not nitrogen catabolite repression sensitive; protein abundance increases in response to DNA replication stress; human homolog OAT complements yeast null mutant	755.976	-0.0557724	0.238559	0.541435
YJL187C	SWE1	10	76803	79262	C	tyrosine protein kinase SWE1|WEE1	Protein kinase that regulates the G2/M transition; negative regulator of the Cdc28p kinase; morphogenesis checkpoint kinase; positive regulator of sphingolipid biosynthesis via Orm2p; phosphorylates a tyrosine residue in the N-terminus of Hsp90 in a cell-cycle associated manner, thus modulating the ability of Hsp90 to chaperone a selected clientele; localizes to the nucleus and to the daughter si…	2720.42	-0.0557651	0.121039	0.381056
YIL065C	FIS1	9	241308	241775	C	MDV2	Protein involved in mitochondrial fission and peroxisome abundance; may have a distinct role in tethering protein aggregates to mitochondria in order to retain them in the mother cell; required for localization of Dnm1p and Mdv1p during mitochondrial division; mediates ethanol-induced apoptosis and ethanol-induced mitochondrial fragmentation	966.915	-0.055762	0.220338	0.520492
YNL111C	CYB5	14	416940	417302	C		Cytochrome b5; involved in the sterol and lipid biosynthesis pathways; acts as an electron donor to support sterol C5-6 desaturation	1474.47	-0.0557397	0.205619	0.503977
YOR192C	THI72	15	698768	700567	C	thiamine transporter	Transporter of thiamine or related compound; contributes to uptake of 5-aminoimidazole-4-carboxamide-1-beta-D-ribofuranoside (acadesine); shares sequence similarity with Thi7p	363.959	-0.0557102	0.321138	0.628661
YBR073W	RDH54	2	383112	385988	W	DNA-dependent ATPase RDH54|TID1	DNA-dependent ATPase; DNA recombination/repair translocase, supercoils DNA and promotes DNA strand opening; stimulates strand exchange by modifying dsDNA topology; involved in recombinational repair of DNA double-strand breaks (DSBs) during mitosis and meiosis; phosphorylated in Mec1p-, Rad53p-dependent way in response to one DSB; contributes to remodelling of nucleosomes; proposed to be involved…	7028.79	-0.0556414	0.0474075	0.223999
YDR047W	HEM12	4	551860	552948	W	uroporphyrinogen decarboxylase HEM12|HEM6	Uroporphyrinogen decarboxylase; catalyzes the fifth step in the heme biosynthetic pathway; localizes to both the cytoplasm and nucleus; a hem12 mutant has phenotypes similar to patients with porphyria cutanea tarda	5317.71	-0.0555338	0.0913671	0.325584
YNL281W	HCH1	14	108467	108928	W		Heat shock protein regulator; binds to Hsp90p and may stimulate ATPase activity; originally identified as a high-copy number suppressor of a HSP90 loss-of-function mutation; role in regulating Hsp90 inhibitor drug sensitivity; GFP-fusion protein localizes to the cytoplasm and nucleus; protein abundance increases in response to DNA replication stress	4182.85	-0.0554796	0.142925	0.416865
YLR216C	CPR6	12	572096	573211	C	peptidylprolyl isomerase CPR6|CYP40	Peptidyl-prolyl cis-trans isomerase (cyclophilin); catalyzes the cis-trans isomerization of peptide bonds N-terminal to proline residues; plays a role in determining prion variants; binds to Hsp82p and contributes to chaperone activity; protein abundance increases in response to DNA replication stress	13604.4	-0.0554766	0.10434	0.350976
YER003C	PMI40	5	157736	159118	C	mannose-6-phosphate isomerase PMI40|PMI	Mannose-6-phosphate isomerase; catalyzes the interconversion of fructose-6-P and mannose-6-P; required for early steps in protein mannosylation	12436.3	-0.0554534	0.172982	0.461526
YHL031C	GOS1	8	38815	39486	C		v-SNARE protein involved in Golgi transport; homolog of the mammalian protein GOS-28/GS28	1372.63	-0.0553321	0.146014	0.420571
YGL078C	DBP3	7	360288	361859	C	RNA-dependent ATPase DBP3	RNA-Dependent ATPase, member of DExD/H-box family; involved in cleavage of site A3 within the ITS1 spacer during rRNA processing; not essential for growth, but deletion causes severe slow-growth phenotype	15647.3	-0.0552699	0.0306701	0.171737
YBR071W	YBR071W	2	380411	381046	W		Protein of unknown function found in the cytoplasm and bud neck; mRNA expression may be regulated by the cell cycle and/or cell wall stress; overexpression of YBR071W affects endocytic protein trafficking	1669.16	-0.0552425	0.232703	0.534875
YGR117C	YGR117C	7	725049	726479	C		Putative protein of unknown function; green fluorescent protein (GFP)-fusion protein localizes to the cytoplasm	3357.06	-0.0551627	0.0748634	0.290714
YDR119W	VBA4	4	688227	690533	W		Protein of unknown function; proposed role as a basic amino acid permease based on phylogeny; GFP-fusion protein localizes to vacuolar membrane; physical interaction with Atg27p suggests a possible role in autophagy; non-essential gene	7908.54	-0.0551576	0.0404341	0.205564
YGL085W	LCL3	7	349616	350440	W		Putative protein of unknown function; mutant has long chronological lifespan; has homology to Staphylococcus aureus nuclease; GFP-fusion protein localizes to mitochondria; is induced in response to the DNA-damaging agent MMS	976.204	-0.0551273	0.187269	0.4805
YKL098W	MTC2	11	256770	257843	W		Protein of unknown function; mtc2 is synthetically sick with cdc13-1	1632.55	-0.0551191	0.122155	0.382898
YCR059C	YIH1	3	223454	224230	C		Negative regulator of eIF2 kinase Gcn2p; competes with Gcn2p for binding to Gcn1p; may contribute to regulation of translation in response to starvation via regulation of Gcn2p; binds to monomeric actin and to ribosomes and polyribosomes; ortholog of mammalian IMPACT	2390.36	-0.0550919	0.140734	0.414072
YLR315W	NKP2	12	764808	765269	W		Central kinetochore protein and subunit of the Ctf19 complex; mutants have elevated rates of chromosome loss; orthologous to fission yeast kinetochore protein cnl2	143.94	-0.0550657	0.387942	0.682356
YBR104W	YMC2	2	449667	450656	W	organic acid transporter	Putative mitochondrial inner membrane transporter; proposed role in oleate metabolism and glutamate biosynthesis; member of the mitochondrial carrier (MCF) family; YMC2 has a paralog, YMC1, that arose from the whole genome duplication	3779.24	-0.0550654	0.200822	0.500532
YPL198W	RPL7B	16	173152	174702	W	uL30|ribosomal 60S subunit protein L7B|YL8|L7B|L6B|L30|rp11	Ribosomal 60S subunit protein L7B; required for processing of 27SA3 pre-rRNA to 27SB pre-rRNA during assembly of large ribosomal subunit; depletion leads to a turnover of pre-rRNA; contains a conserved C-terminal Nucleic acid Binding Domain (NDB2); binds to Domain II of 25S and 5.8S rRNAs; homologous to mammalian ribosomal protein L7 and bacterial L30; RPL7B has a paralog, RPL7A, that arose from …	13662	-0.0550603	0.254046	0.556753
YJL143W	TIM17	10	147101	147577	W	protein transporter TIM17|SMS1|MPI2|MIM17	Essential component of the TIM23 complex; with Tim23p, contributes to the architecture and function of the import channel; may link the import motor to the core Translocase of the Inner Mitochondrial membrane (TIM23 complex)	4227.6	-0.0549252	0.150988	0.428258
YDR527W	RBA50	4	1491094	1492413	W		Protein involved in transcription; interacts with RNA polymerase II subunits Rpb2p, Rpb3, and Rpb11p; has similarity to human RPAP1	5014.82	-0.0548542	0.106972	0.355235
YML010W	SPT5	13	247677	250868	W	transcription elongation factor SPT5	Spt4p/5p (DSIF) transcription elongation factor complex subunit; the Spt4/5 complex binds to ssRNA in a sequence-specific manner, and in concert with RNAP I and II has multiple roles regulating transcriptional elongation, RNA processing, quality control, and transcription-coupled repair; interacts with DNA upstream of RNAPII and the non-template strand of the transcription bubble; Spt5p is the on…	12527.5	-0.0548428	0.0306587	0.171737
YPL257W-B	NA	NA	NA	NA	NA	NA	NA	8300.86	-0.0548101	0.314067	0.621331
YAL030W	SNC1	1	87286	87752	W	SNAP receptor SNC1	Vesicle membrane receptor protein (v-SNARE); involved in the fusion between Golgi-derived secretory vesicles with the plasma membrane; proposed to be involved in endocytosis; member of the synaptobrevin/VAMP family of R-type v-SNARE proteins; SNC1 has a paralog, SNC2, that arose from the whole genome duplication	1237.7	-0.0547712	0.287209	0.591161
YNR059W	MNT4	14	736803	738545	W	putative alpha-1,3-mannosyltransferase	Putative alpha-1,3-mannosyltransferase; not required for protein O-glycosylation; SWAT-GFP and mCherry fusion proteins localize to the endoplasmic reticulum and vacuole respectively	1200.04	-0.0547263	0.204291	0.503252
YPR063C	YPR063C	16	677812	678320	C		ER-localized protein of unknown function	3296.05	-0.054638	0.104102	0.350766
YKL084W	HOT13	11	280509	280859	W		Zinc-binding mitochondrial intermembrane space (IMS) protein; involved in a disulfide relay system for IMS import of cysteine-containing proteins; binds Mia40p and stimulates its Erv1p-dependent oxidation, probably by sequestering zinc	617.876	-0.0545963	0.267156	0.571152
YGR284C	ERV29	7	1060658	1061590	C		Protein localized to COPII-coated vesicles; involved in vesicle formation and incorporation of specific secretory cargo; protein abundance increases in response to DNA replication stress	6400.38	-0.0545889	0.125854	0.38901
YDR519W	FPR2	4	1480425	1480832	W	peptidylprolyl isomerase family protein FPR2|FKB2	Membrane-bound peptidyl-prolyl cis-trans isomerase (PPIase); binds to the drugs FK506 and rapamycin; expression pattern suggests possible involvement in ER protein trafficking; relocalizes from nucleus to vacuole upon DNA replication stress; mutation is functionally complemented by human FKBP2	2014.69	-0.0545656	0.200777	0.500532
YDL127W	PCL2	4	234927	235853	W	cyclin PCL2|CLN4	Cyclin, interacts with cyclin-dependent kinase Pho85p; member of the Pcl1,2-like subfamily, involved in the regulation of polarized growth and morphogenesis and progression through the cell cycle; localizes to sites of polarized cell growth; PCL2 has a paralog, PCL9, that arose from the whole genome duplication	1327.04	-0.0545444	0.18624	0.478915
YBL009W	ALK2	2	207194	209224	W	protein kinase ALK2	Protein kinase; along with its paralog, ALK1, required for proper spindle positioning and nuclear segregation following mitotic arrest, proper organization of cell polarity factors in mitosis, proper localization of formins and polarity factors, and survival in cells that activate spindle assembly checkpoint; phosphorylated in response to DNA damage; ALK2 has a paralog, ALK1, that arose from the …	3157.69	-0.0544787	0.138552	0.412177
YOR270C	VPH1	15	828052	830574	C	H(+)-transporting V0 sector ATPase subunit a	Subunit a of vacuolar-ATPase V0 domain; one of two isoforms (Vph1p and Stv1p); Vph1p is located in V-ATPase complexes of the vacuole while Stv1p is located in V-ATPase complexes of the Golgi and endosomes; relative distribution to the vacuolar membrane decreases upon DNA replication stress; human homolog ATP6V0A4 implicated in renal tubular acidosis, can complement yeast null mutant	31589.5	-0.0543593	0.0809204	0.303781
YHL010C	ETP1	8	81964	83721	C	BRP2	Protein of unknown function required for growth on ethanol; contains a zinc finger region and has homology to human BRAP2, which is a cytoplasmic protein that binds nuclear localization sequences	1009.31	-0.0543499	0.196048	0.494101
YDL134C	PPH21	4	219662	220771	C	phosphoprotein phosphatase 2A catalytic subunit PPH21	Catalytic subunit of protein phosphatase 2A (PP2A); functionally redundant with Pph22p; methylated at C terminus; forms alternate complexes with several regulatory subunits; involved in signal transduction and regulation of mitosis; forms nuclear foci upon DNA replication stress; PPH21 has a paralog, PPH22, that arose from the whole genome duplication	5435.19	-0.0541402	0.104347	0.350976
YDL029W	ARP2	4	399340	400638	W	actin-related protein 2|ACT2	Essential component of the Arp2/3 complex; Arp2/3 is a highly conserved actin nucleation center required for the motility and integrity of actin patches; involved in endocytosis and membrane growth and polarity; required for efficient Golgi-to-ER trafficking in COPI mutants	10978.2	-0.0540703	0.0533838	0.238375
YPL028W	ERG10	16	498096	499292	W	acetyl-CoA C-acetyltransferase|TSM0115|LPB3	Acetyl-CoA C-acetyltransferase (acetoacetyl-CoA thiolase); cytosolic enzyme that transfers an acetyl group from one acetyl-CoA molecule to another, forming acetoacetyl-CoA; involved in the first step in mevalonate biosynthesis; human ACAT1 functionally complements the growth defect caused by repression of ERG10 expression	18543	-0.0539743	0.087408	0.318621
YDR172W	SUP35	4	808324	810381	W	translation termination factor GTPase eRF3|eRF3|[PSI(+)]|[PSI]|SUP36|SUP2|SUF12|SAL3|PNM2|GST1	Translation termination factor eRF3; has a role in mRNA deadenylation and decay; altered protein conformation creates the [PSI(+)] prion that modifies cellular fitness, alters translational fidelity by affecting reading frame selection, and results in a nonsense suppressor phenotype; many stress-response genes are repressed in the presence of [PSI(+)]	27007.6	-0.0539606	0.0548818	0.242398
YLR463C	YLR463C	12	1066265	1066816	C		Dubious open reading frame; unlikely to encode a functional protein, based on available experimental and comparative sequence data; overlaps the uncharacterized ORFs YLR462W and YLR464W	127.462	-0.0539563	0.385763	0.680316
YDR175C	RSM24	4	813193	814152	C	mitochondrial 37S ribosomal protein RSM24	Mitochondrial ribosomal protein of the small subunit	1831.9	-0.0538823	0.130869	0.397652
YHR109W	CTM1	8	330310	332067	W	cytochrome c lysine N-methyltransferase	Cytochrome c lysine methyltransferase; trimethylates residue 72 of apo-cytochrome c (Cyc1p) in the cytosol; not required for normal respiratory growth	755.186	-0.0538669	0.243216	0.546381
YDR226W	ADK1	4	916486	917154	W	adenylate kinase ADK1|AKY2|AKY1	Adenylate kinase, required for purine metabolism; localized to the cytoplasm and the mitochondria; lacks cleavable signal sequence; protein abundance increases in response to DNA replication stress; mutations affecting Adk1p catalytic activity deregulate expression of phosphate utilization genes PHO5 and PHO84; human homolog AK1 can complement yeast adk1 mutant	23236.7	-0.0538414	0.079634	0.301747
YBR137W	YBR137W	2	513044	513583	W		Protein with a role in ER delivery of tail-anchored membrane proteins; interacts with Sgt2p; binds to the TRC complex, which inserts proteins into the ER membrane; interacts with Msn5p karyopherin; YBR137W is not an essential gene	1470.21	-0.0538198	0.155481	0.433633
YGL094C	PAN2	7	331118	334465	C	poly(A)-specific ribonuclease	Catalytic subunit of the Pan2p-Pan3p poly(A)-ribonuclease complex; complex acts to control poly(A) tail length and regulate the stoichiometry and activity of postreplication repair complexes	4525.7	-0.0537356	0.107478	0.35614
YNL119W	NCS2	14	401040	402521	W	TUC2	Protein required for uridine thiolation of Lys(UUU) and Glu(UUC) tRNAs; required for the thiolation of uridine at the wobble position of Lys(UUU) and Glu(UUC) tRNAs; has a role in urmylation and in invasive and pseudohyphal growth; inhibits replication of Brome mosaic virus in S. cerevisiae	3730.74	-0.0537197	0.148751	0.424424
YBR231C	SWC5	2	682179	683090	C	AOR1	Component of the SWR1 complex; complex exchanges histone variant H2AZ (Htz1p) for chromatin-bound histone H2A; protein abundance increases in response to DNA replication stress; relocalizes to the cytosol in response to hypoxia	1115.7	-0.0537131	0.19266	0.489457
YGL189C	RPS26A	7	148229	148588	C	eS26|ribosomal 40S subunit protein S26A|S26e|S26A|RPS26	Protein component of the small (40S) ribosomal subunit; homologous to mammalian ribosomal protein S26, no bacterial homolog; RPS26A has a paralog, RPS26B, that arose from the whole genome duplication; human homolog can partially complement an RPS26A, RPS26B double null mutant; mutations in the human gene are associated with Diamond-Blackfan anemia	44941.3	-0.0536065	0.0723318	0.284921
YER148W	SPT15	5	465303	466025	W	TATA-binding protein|TBP|TBP1|BTF1	TATA-binding protein (TBP); general transcription factor that interacts with other factors to form the preinitiation complex at promoters; essential for viability, highly conserved; yeast gene can complement mutations in human homolog TBP	6682.63	-0.053524	0.0795996	0.301747
YPR169W	JIP5	16	878690	880168	W		Protein required for biogenesis of the large ribosomal subunit; required for biogenesis of the large ribosomal subunit; interacts with proteins involved in RNA processing, ribosome biogenesis, ubiquitination and demethylation; similar to WDR55, a human WD repeat protein; essential gene	7105.79	-0.0535237	0.0541343	0.24076
YOL159C-A	YOL159C-A	15	15233	15505	C		Protein of unknown function; overexpression affects endocytic protein trafficking; identified by sequence comparison with hemiascomycetous yeast species	81.5582	-0.0534317	0.404608	0.694262
YLR325C	RPL38	12	781143	781379	C	eL38|ribosomal 60S subunit protein L38|L38e|L38	Ribosomal 60S subunit protein L38; homologous to mammalian ribosomal protein L38, no bacterial homolog	20694.6	-0.0533851	0.103747	0.350183
YLR097C	HRT3	12	336231	337265	C	SCF ubiquitin ligase complex subunit HRT3	Putative SCF-ubiquitin ligase F-box protein; based on both genetic and physical interactions and sequence similarity; identified in association with Cdc53p, Skp1p and Ubi4 in large and small-scale studies	1549.18	-0.0533636	0.199358	0.498752
YHR214C-B	NA	NA	NA	NA	NA	NA	NA	23350.3	-0.0532548	0.25125	0.554468
YNL232W	CSL4	14	214923	215801	W	exosome non-catalytic core subunit CSL4|SKI4	Exosome non-catalytic core component; involved in 3'-5' RNA processing and degradation in both the nucleus and the cytoplasm; predicted to contain an S1 RNA binding domain; human homolog EXOSC1 partially complements yeast csl4 null mutant, and can complement inviability of strain in which expression of CSL4 is repressed	3882.45	-0.0532289	0.196767	0.495143
YPL176C	TRE1	16	216012	218363	C		Transferrin receptor-like protein; plasma membrane protein that binds Bsd2p and regulates ubiquitination and vacuolar degradation of the metal transporter Smf1p; functionally redundant with Tre2p; TRE1 has a paralog, TRE2, that arose from the whole genome duplication	3327.66	-0.0531543	0.0954127	0.334613
YIR016W	YIR016W	9	382628	383425	W		Putative protein of unknown function; expression directly regulated by the metabolic and meiotic transcriptional regulator Ume6p; overexpression causes a cell cycle delay or arrest; non-essential gene; YIR016W has a paralog, YOL036W, that arose from the whole genome duplication	599.204	-0.0531214	0.270518	0.574144
YKL183W	LOT5	11	98721	99641	W		Protein of unknown function; gene expression increases in cultures shifted to a lower temperature; protein abundance increases in response to DNA replication stress	1498.15	-0.0531005	0.168261	0.453556
YPL067C	YPL067C	16	425251	425847	C		Putative protein of unknown function; green fluorescent protein (GFP)-fusion protein localizes to the cytoplasm; YPL067C is not an essential gene	475.761	-0.0530464	0.326478	0.633259
YMR053C	STB2	13	380346	382898	C		Protein that interacts with Sin3p in a two-hybrid assay; part of a large protein complex with Sin3p and Stb1p; STB2 has a paralog, STB6, that arose from the whole genome duplication	206.411	-0.0530452	0.401818	0.69194
YER049W	TPA1	5	251728	253662	W	oxidative DNA demethylase	Fe(II)/2-oxoglutarate-dependent dioxygenase family member; catalyzes the repair of methyl-base lesions in both ss and dsDNA by oxidative demethylation; Poly(rA)-binding protein involved in mRNA poly(A) tail length and mRNA stability; role in translation termination efficiency; interacts with Sup45p (eRF1), Sup35p (eRF3) and Pab1p; similar to human prolyl 4-hydroxylase OGFOD1; binds Fe(II) and 2-o…	14745.1	-0.0530339	0.098843	0.34042
YBR176W	ECM31	2	583720	584658	W	3-methyl-2-oxobutanoate hydroxymethyltransferase	Ketopantoate hydroxymethyltransferase; required for pantothenic acid biosynthesis, converts 2-oxoisovalerate into 2-dehydropantoate	1196.25	-0.0529594	0.266071	0.570295
YMR268C	PRP24	13	802888	804222	C	U6 snRNP complex subunit PRP24	Splicing factor that reanneals snRNPs during spliceosome recycling; reanneals U4 and U6 snRNPs	1081.24	-0.0529558	0.190711	0.487146
YGR120C	COG2	7	730033	730821	C	Golgi transport complex subunit COG2|SEC35	Essential component of the conserved oligomeric Golgi complex; a cytosolic tethering complex that functions in protein trafficking to mediate fusion of transport vesicles to Golgi compartments; the components of the Golgi complex are Gog1p through Cog8p	1133.7	-0.0529321	0.157772	0.436949
YNR017W	TIM23	14	662913	663581	W	protein transporter TIM23|MAS6|MPI3|MIM23	Essential component of the TIM23 complex; involved in protein import into mitochondrial matrix and inner membrane; with Tim17p, contributes to architecture and function of the import channel; TIM23 complex is short for the translocase of the inner mitochondrial membrane	4123.89	-0.0529226	0.115438	0.372088
YJL148W	RPA34	10	140437	141138	W	DNA-directed RNA polymerase I subunit RPA34|CST21|A34.5	RNA polymerase I subunit A34.5; essential for nucleolar assembly and for high polymerase loading rate; nucleolar localization depends on Rpa49p	7027.75	-0.0529071	0.177862	0.466573
YER011W	TIR1	5	175248	176012	W	GPI-anchored mannoprotein|SRP1	Cell wall mannoprotein; expression is downregulated at acidic pH and induced by cold shock and anaerobiosis; abundance is increased in cells cultured without shaking; member of the Srp1p/Tip1p family of serine-alanine-rich proteins	224.791	-0.0528266	0.388023	0.682356
YNR032C-A	HUB1	14	687243	687464	C	ubiquitin-like protein HUB1	Ubiquitin-like protein modifier; promotes alternative splicing of SRC1 pre-mRNA; binds non-covalently to the HIND domain of Snu66, may function in modification of Sph1p and Hbt1p, functionally complemented by the human or S. pombe ortholog; mechanism of Hub1p adduct formation not yet clear	337.546	-0.052742	0.382889	0.679086
YAL061W	BDH2	1	33448	34701	W	putative dehydrogenase BDH2	Putative medium-chain alcohol dehydrogenase with similarity to BDH1; transcription induced by constitutively active PDR1 and PDR3	444.461	-0.0526575	0.41501	0.703632
YLR183C	TOS4	12	520543	522012	C		Putative transcription factor, contains Forkhead Associated domain; binds chromatin; involved in expression homeostasis, buffering of mRNA synthesis rate against gene dosage changes during S phase; target of SBF transcription factor; expression is periodic and peaks in G1; involved in DNA replication checkpoint response; interacts with Rpd3 and Set3 histone deacetylase complexes; APCC(Cdh1) subst…	2923.74	-0.0525548	0.142857	0.416865
YHR138C	YHR138C	8	377355	377699	C		Protein of unknown function; similar to Pbi2p; double null mutant lacking Pbi2p and Yhr138cp exhibits highly fragmented vacuoles; protein abundance increases in response to DNA replication stress	461.927	-0.0524946	0.32746	0.633883
YPL208W	RKM1	16	157842	159593	W	protein-lysine N-methyltransferase	SET-domain lysine-N-methyltransferase; catalyzes the formation of dimethyllysine residues on the large ribosomal subunit proteins L23 (Rpl23Ap and Rpl23Bp) and monomethyllysine residues on L18 (Rps18Ap and Rps18Bp)	2725.29	-0.0524788	0.137103	0.409322
YDR206W	EBS1	4	862054	864708	W		Protein involved in translation inhibition and nonsense-mediated decay; interacts with cap binding protein Cdc33p and with Nam7p; localizes to P-bodies upon glucose starvation; mRNA abundance regulated by mRNA decay factors; EBS1 has a paralog, EST1, that arose from the whole genome duplication	6539.69	-0.0524648	0.0599557	0.255248
YDR003W	RCR2	4	454122	454754	W	SSH5	Vacuolar protein; presumably functions within the endosomal-vacuolar trafficking pathway, affecting events that determine whether plasma membrane proteins are degraded or routed to the plasma membrane; RCR2 has a paralog, RCR1, that arose from the whole genome duplication	881.317	-0.0523824	0.214495	0.514126
YOL073C	DSC2	15	193832	194800	C		Multi-transmembrane subunit of the DSC ubiquitin ligase complex; similar in sequence to rhomboid pseudoproteases Der1p and UBAC2 that function in ERAD; ortholog of fission yeast dsc2	1292.12	-0.0523466	0.27028	0.574144
YOR142W-B	NA	NA	NA	NA	NA	NA	NA	23768.4	-0.0523302	0.235138	0.537845
YLR102C	APC9	12	342970	343767	C	anaphase promoting complex subunit 9	Subunit of the Anaphase-Promoting Complex/Cyclosome (APC/C); APC/C is a ubiquitin-protein ligase required for degradation of anaphase inhibitors, including mitotic cyclins, during the metaphase/anaphase transition	717.753	-0.0523105	0.268453	0.572627
YLR173W	YLR173W	12	502421	504247	W		Putative protein of unknown function	1240.94	-0.0522456	0.192238	0.488785
YNR055C	HOL1	14	728426	730186	C		Putative transporter in the major facilitator superfamily; member of the 12-spanner drug:H(+) antiporter DHA1 family; mutations in membrane-spanning domains permit cation and histidinol uptake	4731.04	-0.0520794	0.0874128	0.318621
YNR002C	ATO2	14	633008	633856	C	putative ammonium permease ATO2|FUN34	Putative transmembrane protein involved in export of ammonia; ammonia is a starvation signal that promotes cell death in aging colonies; phosphorylated in mitochondria; member of the TC 9.B.33 YaaH family; homolog of Y. lipolytica Gpr1p; ATO2 has a paralog, ADY2, that arose from the whole genome duplication	44.8626	-0.0520156	0.377123	0.674245
YLR031W	YLR031W	12	204225	204785	W		Putative protein of unknown function; S288C contains an in-frame stop codon between ORFs YLR030W and YLR031W; YLR031W has a paralog, YMR124W, that arose from the whole genome duplication	55.0092	-0.0520009	0.39995	0.69159
YDR212W	TCP1	4	887232	888911	W	chaperonin-containing T-complex alpha subunit TCP1|CCT1	Alpha subunit of chaperonin-containing T-complex; complex mediates protein folding in the cytosol; involved in actin cytoskeleton maintenance; overexpression in neurons suppresses formation of pathogenic conformations of huntingtin protein	14752	-0.0519863	0.0562219	0.246614
YLR367W	RPS22B	12	856442	857317	W	uS8|ribosomal 40S subunit protein S22B|S8|rp50|YS22|S24B|S22B	Protein component of the small (40S) ribosomal subunit; homologous to mammalian ribosomal protein S15A and bacterial S8; RPS22B has a paralog, RPS22A, that arose from the whole genome duplication	10418.1	-0.0519521	0.177198	0.466077
YMR175W	SIP18	13	611016	611255	W		Phospholipid-binding hydrophilin; essential to overcome desiccation-rehydration process; expression is induced by osmotic stress; SIP18 has a paralog, GRE1, that arose from the whole genome duplication	19.4699	-0.051944	0.297096	0.602919
YKL160W	ELF1	11	153269	153706	W		Transcription elongation factor with a conserved zinc finger domain; implicated in the maintenance of proper chromatin structure in actively transcribed regions; deletion inhibits Brome mosaic virus (BMV) gene expression	4284.38	-0.0518653	0.175325	0.464302
YJR082C	EAF6	10	581914	582255	C		Subunit of the NuA4 acetyltransferase complex; this complex acetylates histone H4 and NuA3 acetyltransferase complex that acetylates histone H3	656.077	-0.0518609	0.286348	0.589604
YDL211C	YDL211C	4	79294	80412	C		Protein of unknown function; green fluorescent protein (GFP)-fusion protein localizes to the vacuole; YDL211C has a paralog, TDA7, that arose from the whole genome duplication	495.763	-0.05184	0.33562	0.641435
YFL037W	TUB2	6	56336	57709	W	beta-tubulin|SHE8|ARM10	Beta-tubulin; associates with alpha-tubulin (Tub1p and Tub3p) to form tubulin dimer, which polymerizes to form microtubules; mutation in human ortholog is associated with congenital fibrosis of the extraocular muscles (CFEOM) with polymicrogyria	23196.4	-0.0518254	0.0633602	0.261577
YPL132W	COX11	16	301716	302618	W	PSO7|LPI13	Protein required for delivery of copper to Cox1p; mitochondrial inner membrane protein; association with mitochondrial ribosomes suggests that copper delivery may occur during translation of Cox1p	1131.4	-0.0518165	0.31519	0.622057
YCR048W	ARE1	3	211929	213761	W	sterol acyltransferase|SAT2	Acyl-CoA:sterol acyltransferase; endoplasmic reticulum enzyme that contributes the major sterol esterification activity in the absence of oxygen; ARE1 has a paralog, ARE2, that arose from the whole genome duplication	3561.29	-0.0517704	0.123186	0.385083
YLR353W	BUD8	12	834352	836163	W		Protein involved in bud-site selection; diploid mutants display a unipolar budding pattern instead of the wild-type bipolar pattern, and bud at the proximal pole; BUD8 has a paralog, BUD9, that arose from the whole genome duplication	2260.62	-0.0517536	0.176138	0.464561
YJL118W	YJL118W	10	191639	192298	W		Protein of unknown function; may interact with ribosomes, based on co-purification experiments; YJL118W is a non-essential gene; deletion enhances the toxicity of heterologously expressed human alpha-synuclein	375.675	-0.0517258	0.385847	0.680316
YKL009W	MRT4	11	426242	426952	W		Protein involved in mRNA turnover and ribosome assembly; required at post-transcriptional step for efficient retrotransposition; localizes to the nucleolus	10635.5	-0.0516795	0.196876	0.495201
YDR268W	MSW1	4	1004004	1005143	W	tryptophan--tRNA ligase MSW1	Mitochondrial tryptophanyl-tRNA synthetase	1153.43	-0.0515713	0.227645	0.528784
YAL023C	PMT2	1	106272	108551	C	dolichyl-phosphate-mannose-protein mannosyltransferase PMT2|FUN25	Protein O-mannosyltransferase of the ER membrane; transfers mannose residues from dolichyl phosphate-D-mannose to protein serine/threonine residues; involved in ER quality control; acts in a complex with Pmt1p, can instead interact with Pmt5p; antifungal drug target; PMT2 has a paralog, PMT3, that arose from the whole genome duplication	20167.6	-0.0514854	0.143324	0.416983
YLR142W	PUT1	12	425186	426616	W	proline dehydrogenase	Proline oxidase; nuclear-encoded mitochondrial protein involved in utilization of proline as sole nitrogen source; PUT1 transcription is induced by Put3p in the presence of proline and the absence of a preferred nitrogen source	237.323	-0.0514451	0.403376	0.693586
YLR113W	HOG1	12	371620	372927	W	mitogen-activated protein kinase HOG1|SSK3	Mitogen-activated protein kinase involved in osmoregulation; controls global reallocation of RNAPII during osmotic shock; mediates recruitment/activation of RNAPII at Hot1p-dependent promoters; binds calmodulin; stimulates antisense transcription to activate CDC28; defines novel S-phase checkpoint with Mrc1p that prevent replication/transcription conflicts; nuclear form represses pseudohyphal gro…	8142.28	-0.0513957	0.149177	0.425194
YMR321C	YMR321C	13	917579	917896	C		Putative protein of unknown function; proposed to be a palmitoylated membrane protein; YMR321C has a paralog, SAM4, that arose from a single-locus duplication	465.287	-0.0513931	0.157234	0.435878
YBR012C	YBR012C	2	259147	259566	C		Dubious open reading frame; unlikely to encode a functional protein, based on available experimental and comparative sequence data; expression induced by iron-regulated transcriptional activator Aft2p	225.39	-0.0513895	0.409815	0.699243
YPR142C	YPR142C	16	818130	818693	C		Dubious open reading frame; unlikely to encode a functional protein, based on available experimental and comparative sequence data; partially overlaps the verified ORF RRP15, which is required for ribosomal RNA processing	11.9479	-0.0513895	0.0981849	0.340021
YKR079C	TRZ1	11	586789	589305	C	tRNase Z	tRNA 3'-end processing endonuclease tRNase Z; also localized to mitochondria and interacts genetically with Rex2 exonuclease; homolog of the human candidate prostate cancer susceptibility gene ELAC2	4494.18	-0.0513484	0.148659	0.424424
YGL127C	SOH1	7	270392	270775	C	MED31	Subunit of the RNA polymerase II mediator complex; associates with core polymerase subunits to form the RNA polymerase II holoenzyme; involved in telomere maintenance; conserved with other metazoan MED31 subunits	565.043	-0.051332	0.274936	0.576973
YDR385W	EFT2	4	1243230	1245758	W	elongation factor 2	Elongation factor 2 (EF-2), also encoded by EFT1; catalyzes ribosomal translocation during protein synthesis; contains diphthamide, the unique posttranslationally modified histidine residue specifically ADP-ribosylated by diphtheria toxin; EFT2 has a paralog, EFT1, that arose from the whole genome duplication	179044	-0.0513296	0.0599146	0.255248
YDR107C	TMN2	4	669016	671034	C		Protein with a role in cellular adhesion and filamentous growth; similar to Tmn3p; member of the evolutionarily conserved Transmembrane Nine family of proteins with nine membrane-spanning segments; TMN2 has a paralog, EMP70, that arose from the whole genome duplication	1698.4	-0.0513107	0.208237	0.508228
YGR285C	ZUO1	7	1061852	1063153	C	zuotin	Ribosome-associated chaperone; zuotin functions in ribosome biogenesis and as a chaperone for nascent polypeptide chains in partnership with Ssz1p and SSb1/2; contains a DnaJ domain and functions as a J-protein partner for Ssb1p and Ssb2p; human gene DNAJC2 can partially complement yeast zuo1 null mutant	28423.9	-0.0512997	0.195505	0.493696
YMR238W	DFG5	13	746353	747729	W	putative mannan endo-1,6-alpha-mannosidase	Putative mannosidase; essential glycosylphosphatidylinositol (GPI)-anchored membrane protein required for cell wall biogenesis in bud formation, involved in filamentous growth, homologous to Dcw1p	4114.61	-0.0512017	0.0788735	0.301006
YPL026C	SKS1	16	500675	502183	C	putative serine/threonine protein kinase SKS1|SHA3	Putative serine/threonine protein kinase; involved in the adaptation to low concentrations of glucose independent of the SNF3 regulated pathway; SKS1 has a paralog, VHS1, that arose from the whole genome duplication	3008.27	-0.0511054	0.291144	0.596489
YPL157W	TGS1	16	254814	255761	W	RNA methyltransferase	Trimethyl guanosine synthase, conserved nucleolar methyl transferase; converts the m(7)G cap structure of snRNAs, snoRNAs, and telomerase TLC1 RNA to m(2,2,7)G; also required for nucleolar assembly and splicing of meiotic pre-mRNAs; interacts with Swm2p, which may confer substrate specificity on Tgs1p	2014.46	-0.0510385	0.120719	0.380814
[truncated: 4,573 more rows]
