# Supplementary material for: Simultaneous quantification of mRNA and protein in single cells reveals post-transcriptional effects of genetic variation
Source: eLife journal article supplement (doi:10.7554/elife.60645), 2020-11-16
Supplement: supp [file elife-60645-supp-v1.zip › elife_poa_e60645_Figure_7_source_data_2.xlsx]

## Sheet: Sheet1
SourceData_07_2: Differential expression analysis of protein abundance of BY YAK1-Q578* compared to BY YAK1-WT (Mass spectrometry)
sysname	name	chromosome	position_up	position_down	strand	alias	annotation	peptides_number	Scaffold_info	IDyeast	MW	Protein_Grouping_Ambiguity	pValue	log2FC	Average_prot	BH_padj	BY1	BY2	BY3	BY4	BY5	Var1	Var2	Var3	Var4	Var5
YFL014W	HSP12	6	107256	107585	W	lipid-binding protein HSP12|HOR5|GLP1	Plasma membrane protein involved in maintaining membrane organization; involved in maintaining organization during stress conditions; induced by heat shock, oxidative stress, osmostress, stationary phase, glucose depletion, oleate and alcohol; protein abundance increased in response to DNA replication stress and dietary restriction; regulated by the HOG and Ras-Pka pathways; required for dietary …	2	12 kDa heat shock protein OS=Saccharomyces cerevisiae (strain ATCC 204508 / S288c) GN=HSP12 PE=1 SV=1	HSP12_YEAST	12 kDa	NA	0.0001	-0.99	13.625	0.00438983	14.16	14.32	14.27	14.05	13.82	12.75	13.85	13.08	13.21	12.74
YDL223C	HBT1	4	57265	60405	C		Shmoo tip protein, substrate of Hub1p ubiquitin-like protein; mutants are defective for mating projection formation, thereby implicating Hbt1p in polarized cell morphogenesis; HBT1 has a paralog, YNL195C, that arose from the whole genome duplication	4	Protein HBT1 OS=Saccharomyces cerevisiae (strain ATCC 204508 / S288c) GN=HBT1 PE=1 SV=1	HBT1_YEAST	114 kDa	NA	0.0001	-0.96	11.872	0.00438983	12.37	12.55	12.33	12.4	12.15	11.28	11.75	11.46	11.27	11.16
YDR070C	FMP16	4	588098	588379	C		Protein of unknown function; may be involved in responding to conditions of stress; the authentic, non-tagged protein is detected in highly purified mitochondria in high-throughput studies; protein abundance increases in response to DNA replication stress	235	Protein FMP16, mitochondrial OS=Saccharomyces cerevisiae (strain ATCC 204508 / S288c) GN=FMP16 PE=1 SV=1	FMP16_YEAST	11 kDa	NA	0.008	-0.92	14.361	0.088547	14.73	14.56	15.44	14.61	14.66	13.33	15.36	13.84	13.86	13.22
YJL082W	IML2	10	281185	283380	W		Protein required for clearance of inclusion bodies; localizes to the inclusion bodies formed under protein misfolding stress; the authentic, non-tagged protein is detected in highly purified mitochondria in high-throughput studies; protein abundance increases in response to DNA replication stress; IML2 has a paralog, YKR018C, that arose from the whole genome duplication	333	Mitochondrial outer membrane protein IML2 OS=Saccharomyces cerevisiae (strain ATCC 204508 / S288c) GN=IML2 PE=1 SV=1	IML2_YEAST	83 kDa	TRUE	0.025	-0.81	11.395	0.19503	11.46	10.98	12.75	11.91	11.85	11.47	10.35	10.7	11.87	10.61
YGR043C	NQM1	7	580435	581436	C	sedoheptulose-7-phosphate:D-glyceraldehyde-3-phosphate transaldolase NQM1	Transaldolase of unknown function; transcription is repressed by Mot1p and induced by alpha-factor and during diauxic shift; NQM1 has a paralog, TAL1, that arose from the whole genome duplication	237	Transaldolase NQM1 OS=Saccharomyces cerevisiae (strain ATCC 204508 / S288c) GN=NQM1 PE=1 SV=1	TAL2_YEAST	37 kDa	TRUE	0.008	-0.8	11.44	0.088547	11.87	11.94	11.85	11.79	11.75	10.87	11.01	11.21	10.89	11.22
YBR072W	HSP26	2	382030	382674	W	chaperone protein HSP26	Small heat shock protein (sHSP) with chaperone activity; forms hollow, sphere-shaped oligomers that suppress unfolded proteins aggregation; long-lived protein that is preferentially retained in mother cells and forms cytoplasmic foci; oligomer activation requires heat-induced conformational change; also has mRNA binding activity	1	Heat shock protein 26 OS=Saccharomyces cerevisiae (strain ATCC 204508 / S288c) GN=HSP26 PE=1 SV=3	HSP26_YEAST	24 kDa	NA	0.0001	-0.76	13.972	0.00438983	14.49	14.49	14.21	14.3	14.27	13.45	13.9	13.6	13.47	13.54
YHR094C	HXT1	8	290913	292625	C	hexose transporter HXT1|HOR4	Low-affinity glucose transporter of the major facilitator superfamily; expression is induced by Hxk2p in the presence of glucose and repressed by Rgt1p when glucose is limiting; HXT1 has a paralog, HXT6, what arose from the whole genome duplication	342	Low-affinity glucose transporter HXT1 OS=Saccharomyces cerevisiae (strain ATCC 204508 / S288c) GN=HXT1 PE=1 SV=1	HXT1_YEAST	63 kDa	TRUE	0.026	-0.65	10.765	0.199231	10.61	10.13	12.18	11.24	11.26	10.71	10.44	9.67	11.1	10.31
YKL096W	CWP1	11	261132	261851	W	YJU1	Cell wall mannoprotein that localizes to birth scars of daughter cells; linked to a beta-1,3- and beta-1,6-glucan heteropolymer through a phosphodiester bond; required for propionic acid resistance	22	Cell wall protein CWP1 OS=Saccharomyces cerevisiae (strain ATCC 204508 / S288c) GN=CWP1 PE=1 SV=2	CWP1_YEAST	24 kDa	NA	0.0001	-0.61	14.32	0.00438983	14.8	14.37	15.73	14.5	14.15	13.8	14.07	13.91	14.03	13.84
YDL204W	RTN2	4	94605	95786	W		Reticulon protein; involved in nuclear pore assembly and maintenance of tubular ER morphology; promotes membrane curvature; regulates the ER asymmetry-induced inheritance block during ER stress; role in ER-derived peroxisomal biogenesis; interacts with Sec6p, Yip3p, and Sbh1p; less abundant than RTN1; member of RTNLA (reticulon-like A) subfamily; protein increases in abundance and relocalizes to …	10	Reticulon-like protein 2 OS=Saccharomyces cerevisiae (strain ATCC 204508 / S288c) GN=RTN2 PE=1 SV=1	RTN2_YEAST	44 kDa	NA	0.0001	-0.6	11.525	0.00438983	11.77	11.59	12.4	11.81	11.75	11.18	11.14	11.13	11.27	11.21
YDR342C	HXT7	4	1154216	1155928	C	hexose transporter HXT7	High-affinity glucose transporter; member of the major facilitator superfamily, nearly identical to Hxt6p, expressed at high basal levels relative to other HXTs, expression repressed by high glucose levels; HXT7 has a paralog, HXT4, that arose from the whole genome duplication	478	High-affinity hexose transporter HXT6 OS=Saccharomyces cerevisiae (strain ATCC 204508 / S288c) GN=HXT7 PE=1 SV=1	HXT7_YEAST	63 kDa	TRUE	0.056	-0.6	13.451	0.306638	13.5	12.71	14.59	13.89	13.89	13.44	12.87	12.87	13.75	13
YDR345C	HXT3	4	1162957	1164660	C	hexose transporter HXT3	Low affinity glucose transporter of the major facilitator superfamily; expression is induced in low or high glucose conditions; HXT3 has a paralog, HXT5, that arose from the whole genome duplication	1057	Low-affinity glucose transporter HXT3 OS=Saccharomyces cerevisiae (strain ATCC 204508 / S288c) GN=HXT3 PE=1 SV=1	HXT3_YEAST	63 kDa	TRUE	0.26	-0.56	12.649	0.635283	12.55	11.9	13.85	12.94	13.15	12.41	11.87	12.14	13.25	12.43
YLL032C	YLL032C	12	74270	76747	C		Protein of unknown function; may interact with ribosomes, based on co-purification experiments; green fluorescent protein (GFP)-fusion protein localizes to the cytoplasm; YLL032C is not an essential gene	870	KH domain-containing protein YLL032C OS=Saccharomyces cerevisiae (strain ATCC 204508 / S288c) GN=YLL032C PE=1 SV=1	YL032_YEAST	95 kDa	NA	0.19	-0.56	14.909	0.560478	15.91	16.29	14.98	14.75	14.41	14.46	15.52	14.93	13.82	14.02
YGL008C	PMA1	7	479910	482666	C	H(+)-exporting P2-type ATPase PMA1|KTI10	Plasma membrane P2-type H+-ATPase; pumps protons out of cell; major regulator of cytoplasmic pH and plasma membrane potential; long-lived protein asymmetrically distributed at plasma membrane between mother cells and buds; accumulates at high levels in mother cells during aging, buds emerge with very low levels of Pma1p, newborn cells have low levels of Pma1p; Hsp30p plays a role in Pma1p regulat…	259	Cluster of Plasma membrane ATPase 1 OS=Saccharomyces cerevisiae (strain ATCC 204508 / S288c) GN=PMA1 PE=1 SV=2 (PMA1_YEAST)	PMA1_YEAST [2]	100 kDa	TRUE	0.013	-0.53	13.642	0.130504	13.6	12.86	14.95	13.97	14.13	13.44	13.13	13.03	13.98	13.33
YBR006W	UGA2	2	247010	248503	W	succinate-semialdehyde dehydrogenase (NAD(P)(+))|UGA5	Succinate semialdehyde dehydrogenase; involved in the utilization of gamma-aminobutyrate (GABA) as a nitrogen source; part of the 4-aminobutyrate and glutamate degradation pathways; localized to the cytoplasm	43	Succinate-semialdehyde dehydrogenase [NADP(+)] OS=Saccharomyces cerevisiae (strain ATCC 204508 / S288c) GN=UGA2 PE=1 SV=2	UGA2_YEAST	54 kDa	NA	0.0001	-0.5	14.426	0.00438983	14.54	15.04	14.75	14.35	14.81	14.15	13.82	14.29	14.1	14.41
YML128C	MSC1	13	15135	16676	C		Protein of unknown function; mutant is defective in directing meiotic recombination events to homologous chromatids; the authentic, non-tagged protein is detected in highly purified mitochondria and is phosphorylated	3	Meiotic sister chromatid recombination protein 1 OS=Saccharomyces cerevisiae (strain ATCC 204508 / S288c) GN=MSC1 PE=1 SV=1	MSC1_YEAST	60 kDa	NA	0.0001	-0.5	14.036	0.00438983	14.36	14.48	14.21	14.22	14.17	13.77	13.9	13.79	13.72	13.74
YDL052C	SLC1	4	362672	363583	C	1-acylglycerol-3-phosphate O-acyltransferase SLC1	1-acyl-sn-glycerol-3-phosphate acyltransferase; catalyzes the acylation of lysophosphatidic acid to form phosphatidic acid, a key intermediate in lipid metabolism; enzymatic activity detected in lipid particles and microsomes	200	Probable 1-acyl-sn-glycerol-3-phosphate acyltransferase OS=Saccharomyces cerevisiae (strain ATCC 204508 / S288c) GN=SLC1 PE=1 SV=1	PLSC_YEAST	34 kDa	NA	0.005	-0.49	14.92	0.065736	14.91	14.45	15.74	15.21	15.39	14.91	14.2	14.55	15.12	14.72
YDR395W	SXM1	4	1263324	1266158	W	KAP108	Nuclear transport factor (karyopherin); involved in protein transport between the cytoplasm and nucleoplasm; similar to Nmd5p, Cse1p, Lph2p, and the human cellular apoptosis susceptibility protein, CAS1	579	Importin beta SMX1 OS=Saccharomyces cerevisiae (strain ATCC 204508 / S288c) GN=SXM1 PE=1 SV=1	SXM1_YEAST	108 kDa	NA	0.089	-0.49	12.501	0.401585	12.52	11.8	13.6	13	12.91	12.4	11.86	11.86	12.86	12.2
YGR090W	UTP22	7	662358	666071	W	rRNA-processing protein UTP22	Component of the small-subunit processome; required for nuclear export of tRNAs; may facilitate binding of Utp8p to aminoacylated tRNAs and their delivery to Los1p for export; conserved from yeast to mammals	169	U3 small nucleolar RNA-associated protein 22 OS=Saccharomyces cerevisiae (strain ATCC 204508 / S288c) GN=UTP22 PE=1 SV=1	UTP22_YEAST	140 kDa	TRUE	0.0039	-0.46	13.064	0.0578771	12.89	12.76	13.65	13.49	13.53	12.91	12.57	12.85	13.1	12.89
YJR143C	PMT4	10	698326	700614	C	dolichyl-phosphate-mannose-protein mannosyltransferase	Protein O-mannosyltransferase; transfers mannose residues from dolichyl phosphate-D-mannose to protein serine/threonine residues; appears to form homodimers in vivo and does not complex with other Pmt proteins; target for new antifungals	351	Dolichyl-phosphate-mannose--protein mannosyltransferase 4 OS=Saccharomyces cerevisiae (strain ATCC 204508 / S288c) GN=PMT4 PE=1 SV=1	PMT4_YEAST	88 kDa	TRUE	0.029	-0.46	13.718	0.215833	13.6	13.12	14.69	14.01	14.26	13.62	13.11	13.19	14.11	13.47
YPL232W	SSO1	16	107275	108147	W	syntaxin	Plasma membrane t-SNARE; involved in fusion of secretory vesicles at the plasma membrane and in vesicle fusion during sporulation; forms a complex with Sec9p that binds v-SNARE Snc2p; syntaxin homolog; functionally redundant with Sso2p; SSO1 has a paralog, SSO2, that arose from the whole genome duplication	421	Protein SSO1 OS=Saccharomyces cerevisiae (strain ATCC 204508 / S288c) GN=SSO1 PE=1 SV=2	SSO1_YEAST	33 kDa	TRUE	0.042	-0.41	12.069	0.260239	11.95	11.94	12.88	12.23	12.47	11.96	11.86	11.8	11.95	11.65
YIR038C	GTT1	9	423809	424513	C	bifunctional glutathione transferase/peroxidase	ER associated glutathione S-transferase; capable of homodimerization; glutathione transferase for Yvc1p vacuolar cation channel; expression induced during the diauxic shift and throughout stationary phase; functional overlap with Gtt2p, Grx1p, and Grx2p	9	Glutathione S-transferase 1 OS=Saccharomyces cerevisiae (strain ATCC 204508 / S288c) GN=GTT1 PE=1 SV=1	GST1_YEAST	27 kDa	NA	0.0001	-0.4	13.361	0.00438983	13.65	13.64	13.44	13.58	13.5	13.09	13.37	13.06	13.17	13.11
YGR088W	CTT1	7	654634	656322	W	catalase T|SPS101	Cytosolic catalase T; has a role in protection from oxidative damage by hydrogen peroxide	8	Catalase T OS=Saccharomyces cerevisiae (strain ATCC 204508 / S288c) GN=CTT1 PE=1 SV=3	CATT_YEAST	65 kDa	NA	0.0001	-0.39	12.512	0.00438983	12.65	12.71	12.81	12.68	12.69	12.38	12.32	12.3	12.21	12.37
YOR153W	PDR5	15	619840	624375	W	ATP-binding cassette multidrug transporter PDR5|STS1|YDR1|LEM1	Plasma membrane ATP-binding cassette (ABC) transporter; multidrug transporter actively regulated by Pdr1p; also involved in steroid transport, cation resistance, and cellular detoxification during exponential growth; PDR5 has a paralog, PDR15, that arose from the whole genome duplication	274	Cluster of Pleiotropic ABC efflux transporter of multiple drugs OS=Saccharomyces cerevisiae (strain ATCC 204508 / S288c) GN=PDR5 PE=1 SV=1 (PDR5_YEAST)	PDR5_YEAST [3]	170 kDa	TRUE	0.016	-0.38	13.5	0.150691	13.49	12.8	14.37	13.84	13.89	13.43	13.01	13.18	13.8	13.19
YPL274W	SAM3	16	22938	24701	W	bifunctional polyamine/amino acid permease SAM3	High-affinity S-adenosylmethionine permease; required for utilization of S-adenosylmethionine as a sulfur source; has similarity to S-methylmethionine permease Mmp1p	875	S-adenosylmethionine permease SAM3 OS=Saccharomyces cerevisiae (strain ATCC 204508 / S288c) GN=SAM3 PE=1 SV=1	SAM3_YEAST	64 kDa	NA	0.19	-0.38	13.407	0.560478	13.43	12.57	14.34	13.71	13.69	13.39	12.94	13.1	13.78	13.12
YAL023C	PMT2	1	106272	108551	C	dolichyl-phosphate-mannose-protein mannosyltransferase PMT2|FUN25	Protein O-mannosyltransferase of the ER membrane; transfers mannose residues from dolichyl phosphate-D-mannose to protein serine/threonine residues; involved in ER quality control; acts in a complex with Pmt1p, can instead interact with Pmt5p; antifungal drug target; PMT2 has a paralog, PMT3, that arose from the whole genome duplication	334	Dolichyl-phosphate-mannose--protein mannosyltransferase 2 OS=Saccharomyces cerevisiae (strain ATCC 204508 / S288c) GN=PMT2 PE=1 SV=2	PMT2_YEAST	87 kDa	TRUE	0.025	-0.37	13.964	0.19503	13.99	13.16	15.11	14.33	14.34	14.05	13.02	13.47	14.33	13.84
YNL132W	KRE33	14	375321	378491	W	ribosome biosynthesis protein KRE33|RRA1	Protein required for biogenesis of the small ribosomal subunit; heterozygous mutant shows haploinsufficiency in K1 killer toxin resistance; essential gene; NAT10, the human homolog, implicated in several types of cancer and premature aging.	219	RNA cytidine acetyltransferase OS=Saccharomyces cerevisiae (strain ATCC 204508 / S288c) GN=NAT10 PE=1 SV=1	NAT10_YEAST	119 kDa	NA	0.007	-0.37	13.712	0.0827854	13.51	13.15	14.64	14.08	14.14	13.69	12.95	13.43	14.01	13.52
YKL065C	YET1	11	316437	317057	C		Endoplasmic reticulum transmembrane protein; may interact with ribosomes, based on co-purification experiments; homolog of human BAP31 protein; YET1 has a paralog, YET2, that arose from the whole genome duplication	757	Endoplasmic reticulum transmembrane protein 1 OS=Saccharomyces cerevisiae (strain ATCC 204508 / S288c) GN=YET1 PE=1 SV=2	YET1_YEAST	23 kDa	NA	0.15	-0.36	13.27	0.507843	13.13	12.6	14.28	13.77	13.58	13.2	12.49	12.98	13.69	12.98
YNR031C	SSK2	14	680694	685433	C	mitogen-activated protein kinase kinase kinase SSK2	MAP kinase kinase kinase of HOG1 mitogen-activated signaling pathway; interacts with Ssk1p, leading to autophosphorylation and activation of Ssk2p which phosphorylates Pbs2p; also mediates actin cytoskeleton recovery from osmotic stress; a HOG-independent function of Ssk2p mediates the calcium-sensitive phenotype of the ptp2 msg5 double disruptant; SSK2 has a paralog, SSK22, that arose from the w…	303	MAP kinase kinase kinase SSK2 OS=Saccharomyces cerevisiae (strain ATCC 204508 / S288c) GN=SSK2 PE=1 SV=1	SSK2_YEAST	181 kDa	NA	0.02	-0.36	11.377	0.171523	11.64	11.56	11.81	11.45	11.26	11.07	11.72	11.14	11.22	10.9
YPR127W	YPR127W	16	790083	791120	W	pyridoxine 4-dehydrogenase	Putative pyridoxine 4-dehydrogenase; differentially expressed during alcoholic fermentation; expression activated by transcription factor YRM1/YOR172W; green fluorescent protein (GFP)-fusion protein localizes to both the cytoplasm and the nucleus	6	Putative pyridoxal reductase OS=Saccharomyces cerevisiae (strain ATCC 204508 / S288c) GN=YPR127W PE=1 SV=1	PLR1_YEAST	39 kDa	NA	0.0001	-0.36	14.431	0.00438983	14.71	14.74	14.56	14.53	14.51	14.25	14.38	14.22	14.23	14.18
YER110C	KAP123	5	378762	382103	C	YRB4	Karyopherin beta; mediates nuclear import of ribosomal proteins prior to assembly into ribosomes and import of histones H3 and H4; localizes to the nuclear pore, nucleus, and cytoplasm; exhibits genetic interactions with RAI1	17	Importin subunit beta-4 OS=Saccharomyces cerevisiae (strain ATCC 204508 / S288c) GN=KAP123 PE=1 SV=1	IMB4_YEAST	123 kDa	TRUE	0.0001	-0.35	14.186	0.00438983	14	13.62	15.16	14.5	14.54	14.17	13.64	13.81	14.51	13.91
YMR307W	GAS1	13	887003	888682	W	1,3-beta-glucanosyltransferase GAS1|GGP1|CWH52	Beta-1,3-glucanosyltransferase; required for cell wall assembly and also has a role in transcriptional silencing; localizes to cell surface via a glycosylphosphatidylinositol (GPI) anchor; also found at nuclear periphery; genetic interactions with histone H3 lysine acetyltransferases GCN5 and SAS3 indicate previously unsuspected functions for Gas1 in DNA damage response and cell cycle regulation	178	1,3-beta-glucanosyltransferase GAS1 OS=Saccharomyces cerevisiae (strain ATCC 204508 / S288c) GN=GAS1 PE=1 SV=2	GAS1_YEAST	60 kDa	NA	0.004	-0.35	14.822	0.0578771	14.77	14.63	15.55	15.1	15.11	14.8	14.12	14.56	15.03	14.55
YPR183W	DPM1	16	900755	901558	W	dolichyl-phosphate beta-D-mannosyltransferase|SED3	Dolichol phosphate mannose (Dol-P-Man) synthase of ER membrane; catalyzes formation of Dol-P-Man from Dol-P and GDP-Man; required for biosynthesis of glycosyl phosphatidylinositol (GPI) membrane anchor, as well as O-mannosylation and protein N- and O-linked glycosylation; human homolog DPM1 can complement yeast mutant strains	180	Dolichol-phosphate mannosyltransferase OS=Saccharomyces cerevisiae (strain ATCC 204508 / S288c) GN=DPM1 PE=1 SV=3	DPM1_YEAST	30 kDa	NA	0.004	-0.35	13.4	0.0578771	13.35	12.92	14.2	13.68	13.72	13.34	12.74	13.03	13.71	13.31
YCR017C	CWH43	3	144773	147634	C		GPI lipid remodelase; responsible for introducing ceramides into GPI anchors having a C26:0 fatty acid in sn-2 of the glycerol moiety; can also use lyso-GPI protein anchors and various base resistant lipids as substrates; contains 14-16 transmembrane segments and several putative glycosylation and phosphorylation sites; null mutation is synthetically lethal with pkc1 deletion	786	Protein CWH43 OS=Saccharomyces cerevisiae (strain ATCC 204508 / S288c) GN=CWH43 PE=1 SV=2	CWH43_YEAST	108 kDa	NA	0.16	-0.34	12.726	0.51995	12.67	12.2	13.34	13.21	12.94	12.89	12.48	12.2	12.92	12.41
YDR238C	SEC26	4	937895	940816	C	coatomer subunit beta	Essential beta-coat protein of the COPI coatomer; involved in ER-to-Golgi protein trafficking and maintenance of normal ER morphology; shares 43% sequence identity with mammalian beta-coat protein (beta-COP)	127	Coatomer subunit beta OS=Saccharomyces cerevisiae (strain ATCC 204508 / S288c) GN=SEC26 PE=1 SV=2	COPB_YEAST	109 kDa	NA	0.001	-0.34	14.007	0.0181119	13.97	13.52	14.85	14.28	14.29	13.88	13.42	13.72	14.34	13.8
YGL238W	CSE1	7	49552	52434	W	importin-alpha export receptor|KAP109	Nuclear envelope protein that acts as a recycling factor; mediates the nuclear export of Srp1p (importin alpha) back to the cytoplasm after its import substrates have been released into the nucleoplasm, thereby allowing the participation of Srp1p in multiple rounds of nuclear import; required for accurate chromosome segregation; homolog of metazoan CAS and human CSE1L, overexpression of which is …	195	Importin alpha re-exporter OS=Saccharomyces cerevisiae (strain ATCC 204508 / S288c) GN=CSE1 PE=1 SV=2	CSE1_YEAST	109 kDa	NA	0.005	-0.34	12.222	0.065736	12.25	11.77	12.96	12.47	12.47	11.9	11.9	11.98	12.53	11.99
YPL024W	RMI1	16	503517	504242	W	NCE4	Subunit of the RecQ (Sgs1p) - Topo III (Top3p) complex; stimulates superhelical relaxing, DNA catenation/decatenation and ssDNA binding activities of Top3p; involved in response to DNA damage; functions in S phase-mediated cohesion establishment via a pathway involving the Ctf18-RFC complex and Mrc1p; stimulates Top3p DNA catenation/decatenation activity; null mutants display increased rates of r…	182	RecQ-mediated genome instability protein 1 OS=Saccharomyces cerevisiae (strain ATCC 204508 / S288c) GN=RMI1 PE=1 SV=1	RMI1_YEAST	27 kDa	NA	0.004	-0.34	11.43	0.0578771	11.53	11.86	11.49	11.42	11.65	11.02	11.12	11.26	11.46	11.49
YDR508C	GNP1	4	1466453	1468444	C	glutamine permease GNP1	High-affinity glutamine permease; also transports Leu, Ser, Thr, Cys, Met and Asn; expression is fully dependent on Grr1p and modulated by the Ssy1p-Ptr3p-Ssy5p (SPS) sensor of extracellular amino acids; GNP1 has a paralog, AGP1, that arose from the whole genome duplication	177	High-affinity glutamine permease OS=Saccharomyces cerevisiae (strain ATCC 204508 / S288c) GN=GNP1 PE=1 SV=2	GNP1_YEAST	74 kDa	NA	0.004	-0.33	12.006	0.0578771	12.02	11.63	12.84	12.1	12.32	11.82	11.82	11.62	12.25	11.64
YGL022W	STT3	7	452404	454560	W	dolichyl-diphosphooligosaccharide--protein glycosyltransferase subunit STT3	Subunit of the oligosaccharyltransferase complex of the ER lumen; complex catalyzes asparagine-linked glycosylation of newly synthesized proteins; forms a subcomplex with Ost3p and Ost4p and is directly involved in catalysis	636	Dolichyl-diphosphooligosaccharide--protein glycosyltransferase subunit STT3 OS=Saccharomyces cerevisiae (strain ATCC 204508 / S288c) GN=STT3 PE=1 SV=2	STT3_YEAST	82 kDa	NA	0.11	-0.33	13.443	0.438983	13.34	12.66	14.4	13.65	13.81	13.34	13.08	13.11	13.85	13.19
YJR046W	TAH11	10	522048	523862	W	CDT1|SID2	DNA replication licensing factor; required for pre-replication complex assembly	622	Cell division cycle protein CDT1 OS=Saccharomyces cerevisiae (strain ATCC 204508 / S288c) GN=TAH11 PE=1 SV=1	CDT1_YEAST	68 kDa	NA	0.1	-0.33	11.562	0.415064	11.65	11.06	12.13	11.89	11.81	11.61	11.05	11.4	11.78	11.24
YLR342W	FKS1	12	809997	815627	W	1,3-beta-D-glucan synthase|PBR1|GSC1|ETG1|CWH53|CND1	Catalytic subunit of 1,3-beta-D-glucan synthase; functionally redundant with alternate catalytic subunit Gsc2p; binds to regulatory subunit Rho1p; involved in cell wall synthesis and maintenance; localizes to sites of cell wall remodeling; FKS1 has a paralog, GSC2, that arose from the whole genome duplication	363	Cluster of 1,3-beta-glucan synthase component FKS1 OS=Saccharomyces cerevisiae (strain ATCC 204508 / S288c) GN=FKS1 PE=1 SV=2 (FKS1_YEAST)	FKS1_YEAST [2]	215 kDa	TRUE	0.032	-0.33	13.456	0.22895	13.38	12.9	14.37	13.71	13.77	13.35	13.02	13.13	13.7	13.23
YGR198W	YPP1	7	894693	897146	W		Cargo-transport protein involved in endocytosis; interacts with phosphatidylinositol-4-kinase Stt4p; is required, along with Efr3p, for the assembly and recruitment of multiple copies of the kinase into phosphoinositide kinase (PIK) patches at the plasma membrane; positively regulates Stt4p; GFP-fusion protein localizes to the cytoplasm; YGR198W is an essential gene	403	Cargo-transport protein YPP1 OS=Saccharomyces cerevisiae (strain ATCC 204508 / S288c) GN=YPP1 PE=1 SV=1	YPP1_YEAST	95 kDa	NA	0.038	-0.32	12.332	0.245436	12.14	11.94	13.08	12.55	12.8	12.24	11.98	12	12.29	12.3
YPL058C	PDR12	16	445842	450377	C	ATP-binding cassette multidrug transporter PDR12	Plasma membrane ATP-binding cassette (ABC) transporter; weak-acid-inducible multidrug transporter required for weak organic acid resistance; induced by sorbate and benzoate and regulated by War1p; mutants exhibit sorbate hypersensitivity	1015	ATP-dependent permease PDR12 OS=Saccharomyces cerevisiae (strain ATCC 204508 / S288c) GN=PDR12 PE=1 SV=1	PDR12_YEAST	171 kDa	TRUE	0.25	-0.32	13.798	0.628031	13.78	13.37	14.66	13.92	14.09	13.75	13.23	13.23	14.24	13.71
YBR054W	YRO2	2	343101	344135	W		Protein with a putative role in response to acid stress; null mutant is sensitive to acetic acid; transcription is regulated by Haa1p and induced in the presence of acetic acid; protein observed in plasma membrane foci in the presence of acetic acid; the authentic, non-tagged protein is detected in a phosphorylated state in highly purified mitochondria in high-throughput studies	819	Cluster of Protein YRO2 OS=Saccharomyces cerevisiae (strain ATCC 204508 / S288c) GN=YRO2 PE=1 SV=1 (YRO2_YEAST)	YRO2_YEAST [2]	39 kDa	TRUE	0.17	-0.31	12.719	0.530482	12.57	12.49	13.34	12.82	12.88	12.47	12.4	12.43	12.91	12.88
YDL095W	PMT1	4	287059	289512	W	dolichyl-phosphate-mannose-protein mannosyltransferase PMT1	Protein O-mannosyltransferase of the ER membrane; transfers mannose from dolichyl phosphate-D-mannose to protein serine and threonine residues; 1 of 7 related proteins involved in O-glycosylation which is essential for cell wall rigidity; involved in ER quality control; amino terminus faces cytoplasm, carboxyl terminus faces ER lumen	373	Dolichyl-phosphate-mannose--protein mannosyltransferase 1 OS=Saccharomyces cerevisiae (strain ATCC 204508 / S288c) GN=PMT1 PE=1 SV=1	PMT1_YEAST	93 kDa	NA	0.033	-0.31	12.89	0.229758	12.83	12.23	13.7	13.18	13.14	12.81	12.59	12.59	13.16	12.67
YMR259C	TRM732	13	784621	788883	C	tRNA methylation protein TRM732	Protein involved in 2'-O-methylation of C32 of substrate tRNAs; interacts with 2'-O-ribose methyltransferase Trm7p; green fluorescent protein (GFP)-fusion protein localizes to the cytoplasm; non-essential gene; yeast null mutant can be functionally complemented by human THADA, mutations in which have been implicated in epithelial thyroid adenomas, type 2 diabetes, and polycystic ovary syndrome (P…	799	tRNA (cytidine(32)-2'-O)-methyltransferase non-catalytic subunit TRM732 OS=Saccharomyces cerevisiae (strain ATCC 204508 / S288c) GN=TRM732 PE=1 SV=1	TR732_YEAST	164 kDa	TRUE	0.16	-0.31	12.43	0.51995	12.3	11.98	13.24	12.67	12.72	12.66	12.05	11.79	12.77	12.12
YPL246C	RBD2	16	84509	85297	C	putative rhomboid protease RBD2	Possible rhomboid protease; has similarity to eukaryotic rhomboid proteases including Pcp1p	774	Rhomboid protein 2 OS=Saccharomyces cerevisiae (strain ATCC 204508 / S288c) GN=RBD2 PE=1 SV=1	RBD2_YEAST	30 kDa	NA	0.16	-0.31	12.132	0.51995	12.03	11.65	12.67	12.39	12.51	11.97	11.78	11.74	12.53	12.05
YDL212W	SHR3	4	78426	79058	W	APF1	Endoplasmic reticulum packaging chaperone; required for incorporation of amino acid permeases into COPII coated vesicles for transport to the cell surface	607	Secretory component protein SHR3 OS=Saccharomyces cerevisiae (strain ATCC 204508 / S288c) GN=SHR3 PE=1 SV=2	SHR3_YEAST	24 kDa	NA	0.096	-0.3	14.235	0.413023	14.17	13.89	14.9	14.42	14.5	14.11	13.93	13.89	14.51	14.03
YER062C	GPP2	5	279930	280682	C	HOR2|glycerol-1-phosphatase HOR2	DL-glycerol-3-phosphate phosphatase involved in glycerol biosynthesis; also known as glycerol-1-phosphatase; induced in response to hyperosmotic or oxidative stress, and during diauxic shift; GPP2 has a paralog, GPP1, that arose from the whole genome duplication	53	Glycerol-1-phosphate phosphohydrolase 2 OS=Saccharomyces cerevisiae (strain ATCC 204508 / S288c) GN=GPP2 PE=1 SV=1	GPP2_YEAST	28 kDa	TRUE	0.0001	-0.3	13.385	0.00438983	13.54	13.68	13.55	13.58	13.32	13.09	13.64	13.17	13.24	13.04
YGR284C	ERV29	7	1060658	1061590	C		Protein localized to COPII-coated vesicles; involved in vesicle formation and incorporation of specific secretory cargo; protein abundance increases in response to DNA replication stress	959	ER-derived vesicles protein ERV29 OS=Saccharomyces cerevisiae (strain ATCC 204508 / S288c) GN=ERV29 PE=1 SV=1	ERV29_YEAST	35 kDa	NA	0.22	-0.3	12.359	0.594161	12.19	11.77	13.03	12.85	12.64	12.26	12.11	12.04	12.46	12.24
YMR308C	PSE1	13	888952	892221	C	KAP121	Karyopherin/importin that interacts with the nuclear pore complex; acts as the nuclear import receptor for specific proteins, including Pdr1p, Yap1p, Ste12p, and Aft1p	209	Importin subunit beta-3 OS=Saccharomyces cerevisiae (strain ATCC 204508 / S288c) GN=PSE1 PE=1 SV=2	IMB3_YEAST	121 kDa	NA	0.006	-0.3	13.522	0.0736493	13.37	12.95	14.39	13.81	13.83	13.49	13.01	13.19	13.88	13.3
YDL072C	YET3	4	329836	330447	C		Protein of unknown function; YET3 null mutant decreases the level of secreted invertase; homolog of human BAP31 protein; protein abundance increases in response to DNA replication stress	766	Endoplasmic reticulum transmembrane protein 3 OS=Saccharomyces cerevisiae (strain ATCC 204508 / S288c) GN=YET3 PE=1 SV=1	YET3_YEAST	23 kDa	NA	0.15	-0.29	13.943	0.507843	13.84	13.32	14.82	14.18	14.25	13.83	13.45	13.73	14.3	13.71
YDL192W	ARF1	4	116321	116866	W	Arf family GTPase ARF1	ADP-ribosylation factor; GTPase of the Ras superfamily involved in regulation of coated vesicle formation in intracellular trafficking within the Golgi; ARF1 has a paralog, ARF2, that arose from the whole genome duplication; arf1 arf2 double null mutation is complemented by human ARF1, ARF4, ARF5, or ARF6	1225	Cluster of ADP-ribosylation factor 1 OS=Saccharomyces cerevisiae (strain ATCC 204508 / S288c) GN=ARF1 PE=1 SV=3 (ARF1_YEAST)	ARF1_YEAST [2]	21 kDa	TRUE	0.33	-0.29	11.866	0.695443	12.09	12.17	11.76	12.12	11.85	12.03	11.56	11.39	11.89	11.8
YDR233C	RTN1	4	929470	930357	C		Reticulon protein; involved in nuclear pore assembly and maintenance of tubular ER morphology; promotes membrane curvature; regulates the ER asymmetry-induced inheritance block during ER stress; role in ER-derived peroxisomal biogenesis; increases tubular ER when overexpressed; mutants have reduced phosphatidylserine transfer between the ER and mitochondria; interacts with exocyst subunit Sec6p, …	164	Reticulon-like protein 1 OS=Saccharomyces cerevisiae (strain ATCC 204508 / S288c) GN=RTN1 PE=1 SV=1	RTN1_YEAST	33 kDa	NA	0.003	-0.29	13.052	0.047378	13.02	12.56	13.77	13.32	13.33	12.97	12.65	12.73	13.32	12.85
YGL195W	GCN1	7	131525	139543	W	AAS103|NDR1	Positive regulator of the Gcn2p kinase activity; forms a complex with Gcn20p; proposed to stimulate Gcn2p activation by an uncharged tRNA	30	Translational activator GCN1 OS=Saccharomyces cerevisiae (strain ATCC 204508 / S288c) GN=GCN1 PE=1 SV=1	GCN1_YEAST	297 kDa	NA	0.0001	-0.29	13.631	0.00438983	13.57	13.12	14.46	13.87	13.9	13.59	13.14	13.2	13.97	13.49
YHR077C	NMD2	8	252374	255756	C	SUP111|UPF2|SUA1|IFS1	Protein involved in the nonsense-mediated mRNA decay (NMD) pathway; interacts with Nam7p and Upf3p; involved in telomere maintenance	536	Nonsense-mediated mRNA decay protein 2 OS=Saccharomyces cerevisiae (strain ATCC 204508 / S288c) GN=NMD2 PE=1 SV=2	NMD2_YEAST	127 kDa	NA	0.074	-0.29	12.552	0.359587	12.61	12.34	13.03	12.84	12.62	12.27	12.82	12.07	12.63	12.29
YKR018C	YKR018C	11	473723	475900	C		Protein of unknown function; green fluorescent protein (GFP)-fusion protein localizes to the cytoplasm and nucleus; protein abundance increases in response to DNA replication stress; YKR018C has a paralog, IML2, that arose from the whole genome duplication	208	Mitochondrial outer membrane protein YKR018C OS=Saccharomyces cerevisiae (strain ATCC 204508 / S288c) GN=YKR018C PE=1 SV=1	YKR18_YEAST	82 kDa	TRUE	0.006	-0.29	13.117	0.0736493	13.06	12.7	13.75	13.44	13.34	12.97	12.89	12.87	13.22	12.93
YLR450W	HMG2	12	1032627	1035764	W	hydroxymethylglutaryl-CoA reductase (NADPH) HMG2	HMG-CoA reductase; converts HMG-CoA to mevalonate, a rate-limiting step in sterol biosynthesis; one of two isozymes; overproduction induces assembly of peripheral ER membrane arrays and short nuclear-associated membrane stacks; forms foci at nuclear periphery upon DNA replication stress; HMG2 has a paralog, HMG1, that arose from the whole genome duplication; human homolog HMGCR can complement yea…	1022	Cluster of 3-hydroxy-3-methylglutaryl-coenzyme A reductase 2 OS=Saccharomyces cerevisiae (strain ATCC 204508 / S288c) GN=HMG2 PE=1 SV=1 (HMDH2_YEAST)	HMDH2_YEAST [2]	116 kDa	TRUE	0.25	-0.29	12.693	0.628031	13.02	12.6	12.62	13.33	12.55	12.35	12.93	12.43	12.29	12.81
YML048W	GSF2	13	178426	179637	W	ECM6	Endoplasmic reticulum (ER) localized integral membrane protein; may promote secretion of certain hexose transporters, including Gal2p; involved in glucose-dependent repression	521	Glucose-signaling factor 2 OS=Saccharomyces cerevisiae (strain ATCC 204508 / S288c) GN=GSF2 PE=1 SV=1	GSF2_YEAST	46 kDa	NA	0.068	-0.29	12.745	0.341318	12.6	11.99	13.7	13.02	13.07	12.76	12.09	12.47	13.19	12.56
YPL012W	RRP12	16	529723	533409	W	mRNA-binding protein RRP12	Protein required for export of the ribosomal subunits; associates with the RNA components of the pre-ribosomes; has a role in nuclear import in association with Pse1p; also plays a role in the cell cycle and the DNA damage response; contains HEAT-repeats	292	Ribosomal RNA-processing protein 12 OS=Saccharomyces cerevisiae (strain ATCC 204508 / S288c) GN=RRP12 PE=1 SV=1	RRP12_YEAST	138 kDa	NA	0.018	-0.29	11.567	0.159658	11.52	11.32	12.35	11.65	11.84	11.45	11.31	11.32	11.65	11.26
YBR029C	CDS1	2	296369	297742	C	phosphatidate cytidylyltransferase|CDG1	Phosphatidate cytidylyltransferase (CDP-diglyceride synthetase); an enzyme that catalyzes that conversion of CTP + phosphate into diphosphate + CDP-diaclglyerol, a critical step in the synthesis of all major yeast phospholipids; human homolog CDS1 can complement yeast cds1 null mutant	1512	Phosphatidate cytidylyltransferase OS=Saccharomyces cerevisiae (strain ATCC 204508 / S288c) GN=CDS1 PE=1 SV=1	CDS1_YEAST	52 kDa	NA	0.46	-0.28	13.502	0.790577	13.28	12.68	14.45	13.94	13.76	13.5	13.07	13.14	13.95	13.25
YDL112W	TRM3	4	258915	263225	W	tRNA (guanosine(18)-2'-O)-methyltransferase	2'-O-ribose methyltransferase; catalyzes the ribose methylation of the guanosine nucleotide at position 18 of tRNAs	834	tRNA (guanosine(18)-2'-O)-methyltransferase OS=Saccharomyces cerevisiae (strain ATCC 204508 / S288c) GN=TRM3 PE=1 SV=1	TRM3_YEAST	165 kDa	NA	0.17	-0.28	11.763	0.530482	11.68	11.05	12.51	12.04	12.08	11.75	11.46	11.48	11.98	11.6
YEL036C	ANP1	5	83050	84552	C	MNN8|GEM3	Subunit of the alpha-1,6 mannosyltransferase complex; type II membrane protein; has a role in retention of glycosyltransferases in the Golgi; involved in osmotic sensitivity and resistance to aminonitrophenyl propanediol	295	Mannan polymerase II complex ANP1 subunit OS=Saccharomyces cerevisiae (strain ATCC 204508 / S288c) GN=ANP1 PE=1 SV=3	ANP1_YEAST	58 kDa	NA	0.018	-0.28	11.728	0.159658	11.81	11.51	12.11	11.91	12.05	11.79	11.21	11.42	11.83	11.64
YEL055C	POL5	5	48471	51539	C	DNA-directed DNA polymerase	DNA Polymerase phi; has sequence similarity to the human MybBP1A and weak sequence similarity to B-type DNA polymerases, not required for chromosomal DNA replication; required for the synthesis of rRNA	328	DNA polymerase V OS=Saccharomyces cerevisiae (strain ATCC 204508 / S288c) GN=POL5 PE=1 SV=1	DPO5_YEAST	116 kDa	TRUE	0.024	-0.28	12.499	0.190675	12.47	12.11	13.13	12.82	12.73	12.32	12.1	12.16	12.71	12.44
YGR060W	ERG25	7	610564	611493	W	methylsterol monooxygenase	C-4 methyl sterol oxidase; catalyzes the first of three steps required to remove two C-4 methyl groups from an intermediate in ergosterol biosynthesis; mutants accumulate the sterol intermediate 4,4-dimethylzymosterol; human MSMO1 functionally complements the growth defect caused by repression of ERG25 expression	1244	Methylsterol monooxygenase OS=Saccharomyces cerevisiae (strain ATCC 204508 / S288c) GN=ERG25 PE=1 SV=1	MSMO_YEAST	36 kDa	NA	0.34	-0.28	13.205	0.701673	12.99	12.5	14.21	13.39	13.53	13.21	12.74	12.63	13.75	13.1
YJL130C	URA2	10	165723	172367	C	bifunctional carbamoylphosphate synthetase/aspartate transcarbamylase	Bifunctional carbamoylphosphate synthetase/aspartate transcarbamylase; catalyzes the first two enzymatic steps in the de novo biosynthesis of pyrimidines; both activities are subject to feedback inhibition by UTP	7	Protein URA2 OS=Saccharomyces cerevisiae (strain ATCC 204508 / S288c) GN=URA2 PE=1 SV=5	PYR1_YEAST	245 kDa	TRUE	0.0001	-0.28	13.806	0.00438983	13.67	13.39	14.47	14.08	14.15	13.75	13.34	13.55	14.04	13.62
YMR015C	ERG5	13	300869	302485	C	C-22 sterol desaturase|CYP61	C-22 sterol desaturase; a cytochrome P450 enzyme that catalyzes the formation of the C-22(23) double bond in the sterol side chain in ergosterol biosynthesis; may be a target of azole antifungal drugs	728	Cytochrome P450 61 OS=Saccharomyces cerevisiae (strain ATCC 204508 / S288c) GN=ERG5 PE=1 SV=1	ERG5_YEAST	61 kDa	NA	0.14	-0.28	12.393	0.488679	12.29	11.74	13.07	12.66	12.72	12.32	11.98	12.1	12.71	12.34
YMR296C	LCB1	13	859215	860891	C	serine C-palmitoyltransferase LCB1|TSC2|END8	Component of serine palmitoyltransferase; responsible along with Lcb2p for the first committed step in sphingolipid synthesis, which is the condensation of serine with palmitoyl-CoA to form 3-ketosphinganine	807	Serine palmitoyltransferase 1 OS=Saccharomyces cerevisiae (strain ATCC 204508 / S288c) GN=LCB1 PE=1 SV=2	LCB1_YEAST	62 kDa	NA	0.17	-0.28	11.913	0.530482	11.94	11.63	12.76	12.21	11.97	11.78	11.53	11.34	12.09	11.88
YPR036W	VMA13	16	643836	645272	W	H(+)-transporting V1 sector ATPase subunit H|CLS11	Subunit H of the V1 peripheral membrane domain of V-ATPase; part of the electrogenic proton pump found throughout the endomembrane system; serves as an activator or a structural stabilizer of the V-ATPase; the V1 peripheral membrane domain of the vacuolar H+-ATPase (V-ATPase) has eight subunits	86	V-type proton ATPase subunit H OS=Saccharomyces cerevisiae (strain ATCC 204508 / S288c) GN=VMA13 PE=1 SV=1	VATH_YEAST	54 kDa	NA	0.00054	-0.28	13.644	0.01665	13.54	13.31	14.25	13.92	13.93	13.56	13.21	13.33	13.9	13.49
YGR261C	APL6	7	1014321	1016750	C	YKS5	Beta3-like subunit of the yeast AP-3 complex; functions in transport of alkaline phosphatase to the vacuole via the alternate pathway; exists in both cytosolic and peripherally associated membrane-bound pools	609	AP-3 complex subunit beta OS=Saccharomyces cerevisiae (strain ATCC 204508 / S288c) GN=APL6 PE=1 SV=2	AP3B_YEAST	92 kDa	NA	0.098	-0.27	14.085	0.415064	13.98	13.47	14.86	14.45	14.31	14.04	13.7	13.88	14.19	13.97
YNR038W	DBP6	14	695595	697484	W	putative ATP-dependent RNA helicase DBP6	Essential protein involved in ribosome biogenesis; putative ATP-dependent RNA helicase of the DEAD-box protein family; human homolog DDX51 complements yeast dbp6 mutant	143	ATP-dependent RNA helicase DBP6 OS=Saccharomyces cerevisiae (strain ATCC 204508 / S288c) GN=DBP6 PE=1 SV=1	DBP6_YEAST	70 kDa	NA	0.001	-0.27	12.058	0.0181119	12.14	12.25	12.35	12.21	12.03	11.85	12.19	11.91	11.87	11.78
YBL017C	PEP1	2	186844	191583	C	type I sorting receptor|VPT1|VPS10	Type I transmembrane sorting receptor for multiple vacuolar hydrolases; cycles between the late-Golgi and prevacuolar endosome-like compartments	326	Vacuolar protein sorting/targeting protein VPS10 OS=Saccharomyces cerevisiae (strain ATCC 204508 / S288c) GN=PEP1 PE=1 SV=1	VPS10_YEAST	178 kDa	TRUE	0.023	-0.26	13.36	0.184427	13.36	12.9	14.02	13.6	13.6	13.31	12.87	13.13	13.59	13.22
YCR042C	TAF2	3	201174	205397	C	TafII150|TSM1|TAF150	TFIID subunit (150 kDa); involved in RNA polymerase II transcription initiation	618	Transcription initiation factor TFIID subunit 2 OS=Saccharomyces cerevisiae (strain ATCC 204508 / S288c) GN=TAF2 PE=1 SV=3	TAF2_YEAST	161 kDa	NA	0.1	-0.26	13.847	0.415064	14.03	13.85	13.59	13.94	14.36	13.54	13.61	13.93	13.76	13.86
YER019W	ISC1	5	192797	194230	W	inositol phosphosphingolipid phospholipase	Inositol phosphosphingolipid phospholipase C; mitochondrial membrane localized; hydrolyzes complex sphingolipids to produce ceramide; activates genes required for non-fermentable carbon source metabolism during diauxic shift; activated by phosphatidylserine, cardiolipin, and phosphatidylglycerol; mediates Na+ and Li+ halotolerance; ortholog of mammalian neutral sphingomyelinase type 2	1128	Inositol phosphosphingolipids phospholipase C OS=Saccharomyces cerevisiae (strain ATCC 204508 / S288c) GN=ISC1 PE=1 SV=1	ISC1_YEAST	54 kDa	NA	0.29	-0.26	12.698	0.662346	12.62	12.14	13.42	12.88	12.9	12.51	12.67	12.51	12.94	12.39
YGL233W	SEC15	7	59122	61854	W	Rab GTPase-binding exocyst subunit SEC15	Essential 113 kDa subunit of the exocyst complex; the exocyst mediates polarized targeting and tethering of post-Golgi secretory vesicles to active sites of exocytosis prior to SNARE-mediated fusion; interacts with and functions as a downstream effector of active, GTP-bound Sec4p, a Rab family GTPase	440	Exocyst complex component SEC15 OS=Saccharomyces cerevisiae (strain ATCC 204508 / S288c) GN=SEC15 PE=1 SV=2	SEC15_YEAST	105 kDa	NA	0.047	-0.26	12.408	0.278558	12.57	12.11	12.79	12.72	12.46	12.1	12.34	12.17	12.55	12.27
YJL084C	ALY2	10	274862	278002	C	ART3	Alpha arrestin; controls nutrient-mediated intracellular sorting of permease Gap1p; interacts with AP-1 subunit Apl4p; phosphorylated by Npr1p and also by cyclin-CDK complex Pcl7p-Pho85p; promotes endocytosis of plasma membrane proteins; ALY2 has a paralog, ALY1, that arose from the whole genome duplication	152	Arrestin-related trafficking adapter 3 OS=Saccharomyces cerevisiae (strain ATCC 204508 / S288c) GN=ALY2 PE=1 SV=2	ALY2_YEAST	117 kDa	NA	0.002	-0.26	11.786	0.0329936	11.92	11.75	11.96	12.02	11.93	11.56	11.86	11.68	11.47	11.71
YKL010C	UFD4	11	421424	425875	C	putative ubiquitin-protein ligase UFD4	Ubiquitin-protein ligase (E3); interacts with Rpt4p and Rpt6p, two subunits of the 19S particle of the 26S proteasome; cytoplasmic E3 involved in the degradation of ubiquitin fusion proteins; relative distribution to the nucleus increases upon DNA replication stress	1165	Ubiquitin fusion degradation protein 4 OS=Saccharomyces cerevisiae (strain ATCC 204508 / S288c) GN=UFD4 PE=1 SV=1	UFD4_YEAST	168 kDa	NA	0.3	-0.26	10.011	0.669251	9.82	9.33	11.03	10.27	10.3	9.9	9.52	9.56	10.28	10.1
YKL212W	SAC1	11	34543	36414	W	phosphatidylinositol-3-phosphatase SAC1|RSD1	Phosphatidylinositol phosphate (PtdInsP) phosphatase; involved in hydrolysis of PtdIns[4]P in the early and medial Golgi; regulated by interaction with Vps74p; ER localized transmembrane protein which cycles through the Golgi; involved in protein trafficking and processing, secretion, and cell wall maintenance; regulates sphingolipid biosynthesis through the modulation of PtdIns(4)P metabolism	139	Phosphoinositide phosphatase SAC1 OS=Saccharomyces cerevisiae (strain ATCC 204508 / S288c) GN=SAC1 PE=1 SV=1	SAC1_YEAST	71 kDa	NA	0.001	-0.26	13.367	0.0181119	13.4	12.97	13.98	13.59	13.51	13.21	13.09	13.15	13.5	13.27
YOR151C	RPB2	15	612997	616671	C	DNA-directed RNA polymerase II core subunit RPB2|B150|SOH2|SIT2|RPO22|RPB150	RNA polymerase II second largest subunit B150; part of central core; similar to bacterial beta subunit	58	DNA-directed RNA polymerase II subunit RPB2 OS=Saccharomyces cerevisiae (strain ATCC 204508 / S288c) GN=RPB2 PE=1 SV=2	RPB2_YEAST	139 kDa	NA	0.0001	-0.26	13.291	0.00438983	13.13	12.98	13.77	13.66	13.55	13.27	12.94	13.05	13.47	13.09
YOR270C	VPH1	15	828052	830574	C	H(+)-transporting V0 sector ATPase subunit a	Subunit a of vacuolar-ATPase V0 domain; one of two isoforms (Vph1p and Stv1p); Vph1p is located in V-ATPase complexes of the vacuole while Stv1p is located in V-ATPase complexes of the Golgi and endosomes; relative distribution to the vacuolar membrane decreases upon DNA replication stress; human homolog ATP6V0A4 implicated in renal tubular acidosis, can complement yeast null mutant	183	V-type proton ATPase subunit a, vacuolar isoform OS=Saccharomyces cerevisiae (strain ATCC 204508 / S288c) GN=VPH1 PE=1 SV=3	VPH1_YEAST	96 kDa	NA	0.0045	-0.26	12.29	0.06475	12.28	11.8	13.02	12.43	12.59	12.3	11.82	11.97	12.53	12.16
YPR149W	NCE102	16	829918	830439	W	NCE2	Protein of unknown function; contains transmembrane domains; involved in secretion of proteins that lack classical secretory signal sequences; component of the detergent-insoluble glycolipid-enriched complexes (DIGs); NCE102 has a paralog, FHN1, that arose from the whole genome duplication	517	Non-classical export protein 2 OS=Saccharomyces cerevisiae (strain ATCC 204508 / S288c) GN=NCE102 PE=1 SV=1	NCE2_YEAST	19 kDa	NA	0.067	-0.26	12.066	0.338926	12.07	11.75	12.83	12.26	12.24	11.84	11.89	12.03	12.25	11.5
YDR211W	GCD6	4	884727	886865	W	translation initiation factor eIF2B catalytic subunit epsilon	Catalytic epsilon subunit of the translation initiation factor eIF2B; eIF2B is the guanine-nucleotide exchange factor for eIF2; activity subsequently regulated by phosphorylated eIF2; first identified as a negative regulator of GCN4 expression; forms cytoplasmic foci upon DNA replication stress	402	Translation initiation factor eIF-2B subunit epsilon OS=Saccharomyces cerevisiae (strain ATCC 204508 / S288c) GN=GCD6 PE=1 SV=1	EI2BE_YEAST	81 kDa	NA	0.038	-0.25	13.334	0.245436	13.15	12.9	13.93	13.72	13.61	13.27	12.77	13.29	13.5	13.2
YER141W	COX15	5	453459	454919	W		Protein required for the hydroxylation of heme O to form heme A; heme A is an essential prosthetic group for cytochrome c oxidase	1295	Cytochrome c oxidase assembly protein COX15 OS=Saccharomyces cerevisiae (strain ATCC 204508 / S288c) GN=COX15 PE=3 SV=1	COX15_YEAST	55 kDa	NA	0.36	-0.25	11.595	0.720556	11.4	11.04	12.19	12	11.81	11.42	11.13	11.27	11.98	11.71
YHR098C	SFB3	8	299145	301934	C	LST1	Component of the Sec23p-Sfb3p heterodimer of the COPII vesicle coat; COPII coat is required for cargo selection during vesicle formation in ER to Golgi transport; scaffolding function of Lst1p required to generate vesicles that can accommodate difficult cargo proteins that include large oligomeric assemblies and asymmetrically distributed membrane proteins; homologous to Sec24p and Sfb2p	989	SED5-binding protein 3 OS=Saccharomyces cerevisiae (strain ATCC 204508 / S288c) GN=SFB3 PE=1 SV=1	SFB3_YEAST	104 kDa	NA	0.23	-0.25	12.269	0.607237	12.01	11.74	12.69	12.66	12.62	12.34	11.98	12.04	12.46	12.15
YHR190W	ERG9	8	484845	486179	W	bifunctional farnesyl-diphosphate farnesyltransferase/squalene synthase	Farnesyl-diphosphate farnesyl transferase (squalene synthase); joins two farnesyl pyrophosphate moieties to form squalene in the sterol biosynthesis pathway	255	Squalene synthase OS=Saccharomyces cerevisiae (strain ATCC 204508 / S288c) GN=ERG9 PE=1 SV=2	FDFT_YEAST	52 kDa	NA	0.011	-0.25	14.439	0.113056	14.32	14.15	15.1	14.66	14.69	14.49	13.91	14.09	14.72	14.26
YKL182W	FAS1	11	100671	106826	W	tetrafunctional fatty acid synthase subunit FAS1	Beta subunit of fatty acid synthetase; complex catalyzes the synthesis of long-chain saturated fatty acids; contains acetyltransacylase, dehydratase, enoyl reductase, malonyl transacylase, and palmitoyl transacylase activities	25	Fatty acid synthase subunit beta OS=Saccharomyces cerevisiae (strain ATCC 204508 / S288c) GN=FAS1 PE=1 SV=2	FAS1_YEAST	229 kDa	NA	0.0001	-0.25	14.252	0.00438983	14.09	13.76	14.94	14.55	14.54	14.25	13.74	13.99	14.6	14.06
YMR196W	YMR196W	13	655076	658342	W		Putative protein of unknown function; green fluorescent protein (GFP)-fusion protein localizes to the cytoplasm; YMR196W is not an essential gene	269	Uncharacterized protein YMR196W OS=Saccharomyces cerevisiae (strain ATCC 204508 / S288c) GN=YMR196W PE=1 SV=1	YM54_YEAST	127 kDa	NA	0.015	-0.25	12.546	0.144963	12.47	12.29	12.98	12.77	12.84	12.38	12.27	12.5	12.65	12.31
YNL160W	YGP1	14	336545	337609	W		Cell wall-related secretory glycoprotein; induced by nutrient deprivation-associated growth arrest and upon entry into stationary phase; may be involved in adaptation prior to stationary phase entry; YGP1 has a paralog, SPS100, that arose from the whole genome duplication	60	Protein YGP1 OS=Saccharomyces cerevisiae (strain ATCC 204508 / S288c) GN=YGP1 PE=1 SV=2	YGP1_YEAST	37 kDa	NA	0.0001	-0.25	12.675	0.00438983	12.64	12.72	13	12.79	12.84	12.44	12.76	12.46	12.61	12.49
YOR304W	ISW2	15	884514	887876	W	DNA translocase	ATP-dependent DNA translocase involved in chromatin remodeling; ATPase component that, with Itc1p, forms a complex required for repression of a-specific genes, INO1, and early meiotic genes during mitotic growth; the Isw2 complex exhibits basal levels of chromatin binding throughout the genome as well as target-specific chromatin interactions; targeted by Ume6p- and Sua7p-dependent DNA looping to…	444	ISWI chromatin-remodeling complex ATPase ISW2 OS=Saccharomyces cerevisiae (strain ATCC 204508 / S288c) GN=ISW2 PE=1 SV=1	ISW2_YEAST	130 kDa	TRUE	0.049	-0.25	11.182	0.287127	11.11	10.72	11.58	11.68	11.35	11.06	10.85	11.07	11.27	11.13
YPR043W	RPL43A	16	654166	654847	W	eL43|ribosomal 60S subunit protein L43A|L43e|L43A	Ribosomal 60S subunit protein L43A; null mutation confers a dominant lethal phenotype; homologous to mammalian ribosomal protein L37A, no bacterial homolog; RPL43A has a paralog, RPL43B, that arose from the whole genome duplication	151	60S ribosomal protein L43-A OS=Saccharomyces cerevisiae (strain ATCC 204508 / S288c) GN=RPL43A PE=1 SV=1	RL43A_YEAST	10 kDa	NA	0.002	-0.25	13.972	0.0329936	14.37	14.32	14.1	14.31	13.89	13.85	12.92	14.03	14.08	13.85
YBL079W	NUP170	2	75259	79767	W	NLE3	Subunit of inner ring of nuclear pore complex (NPC); contributes to NPC assembly and nucleocytoplasmic transport; interacts with genomic regions that contain ribosomal protein and subtelomeric genes, where it functions in nucleosome positioning and as a repressor of transcription; both Nup170p and NUP157p are similar to human Nup155p; NUP170 has a paralog, NUP157, that arose from the whole genome…	1051	Nucleoporin NUP170 OS=Saccharomyces cerevisiae (strain ATCC 204508 / S288c) GN=NUP170 PE=1 SV=1	NU170_YEAST	169 kDa	NA	0.26	-0.24	13.643	0.635283	13.47	13.05	14.52	13.83	13.89	13.45	13.37	13.46	13.85	13.54
YBR218C	PYC2	2	658707	662249	C	pyruvate carboxylase 2	Pyruvate carboxylase isoform; cytoplasmic enzyme that converts pyruvate to oxaloacetate; differentially regulated than isoform Pyc1p; mutations in the human homolog are associated with lactic acidosis; PYC2 has a paralog, PYC1, that arose from the whole genome duplication	226	Cluster of Pyruvate carboxylase 2 OS=Saccharomyces cerevisiae (strain ATCC 204508 / S288c) GN=PYC2 PE=1 SV=2 (PYC2_YEAST)	PYC2_YEAST [2]	130 kDa	TRUE	0.008	-0.24	14.629	0.088547	14.39	14.15	15.38	14.93	14.95	14.62	14.21	14.4	14.86	14.4
YDL110C	TMA17	4	264512	264964	C	ADC17	ATPase dedicated chaperone that adapts proteasome assembly to stress; Tma17p is induced upon stress; interacts with Rpt6p to assist its pairing to Rpt3p and early steps in proteasome biogenesis; associates with ribosomes; heterozygous deletion demonstrated increases in chromosome instability in a rad9 deletion background; protein abundance is decreased upon intracellular iron depletion	210	Translation machinery-associated protein 17 OS=Saccharomyces cerevisiae (strain ATCC 204508 / S288c) GN=TMA17 PE=1 SV=1	TMA17_YEAST	17 kDa	NA	0.006	-0.24	13.593	0.0736493	13.8	13.83	13.61	13.74	13.57	13.35	13.9	13.37	13.55	13.21
YDL190C	UFD2	4	118707	121592	C	ubiquitin-ubiquitin ligase UFD2	Ubiquitin chain assembly factor (E4); cooperates with a ubiquitin-activating enzyme (E1), a ubiquitin-conjugating enzyme (E2), and a ubiquitin protein ligase (E3) to conjugate ubiquitin to substrates; also functions as an E3	1129	E4 ubiquitin-protein ligase UFD2 OS=Saccharomyces cerevisiae (strain ATCC 204508 / S288c) GN=UFD2 PE=1 SV=3	UFD2_YEAST	110 kDa	TRUE	0.29	-0.24	12.626	0.662346	12.26	12.02	13.58	12.92	13	12.69	11.84	12.51	12.92	12.52
YDR164C	SEC1	4	782041	784215	C		Sm-like protein involved in docking and fusion of exocytic vesicles; binds to assembled SNARE complexes at the membrane and stimulates membrane fusion; localization to sites of secretion (bud neck and bud tip) is dependent on SNARE function; interacts directly with essential exocyst subunit Sec6p	829	Protein transport protein SEC1 OS=Saccharomyces cerevisiae (strain ATCC 204508 / S288c) GN=SEC1 PE=1 SV=1	SEC1_YEAST	83 kDa	NA	0.17	-0.24	11.246	0.530482	11.42	10.65	11.67	11.66	11.5	11.29	10.89	10.7	11.49	11.19
YFR002W	NIC96	6	150016	152535	W	linker nucleoporin NIC96	Linker nucleoporin component of the nuclear pore complex (NPC); also part of the NPC nuclear basket; contributes to nucleocytoplasmic transport and NPC biogenesis; forms stable associations with three FG-nucleoporins (Nsp1p, Nup57p, and Nup49p)	1114	Nucleoporin NIC96 OS=Saccharomyces cerevisiae (strain ATCC 204508 / S288c) GN=NIC96 PE=1 SV=2	NIC96_YEAST	96 kDa	NA	0.28	-0.24	13.288	0.649821	13.13	12.78	14.04	13.44	13.53	13.33	12.81	13.01	13.74	13.07
YIL075C	RPN2	9	217863	220700	C	proteasome regulatory particle base subunit RPN2|SEN3	Subunit of the 26S proteasome; substrate of the N-acetyltransferase Nat1p; protein abundance increases in response to DNA replication stress	100	26S proteasome regulatory subunit RPN2 OS=Saccharomyces cerevisiae (strain ATCC 204508 / S288c) GN=RPN2 PE=1 SV=4	RPN2_YEAST	104 kDa	TRUE	0.00075	-0.24	13.526	0.0181119	13.34	13.11	14.26	13.76	13.79	13.47	13.14	13.27	13.82	13.3
YML125C	PGA3	13	20761	21699	C	cytochrome-b5 reductase|NQR1	Putative cytochrome b5 reductase, localized to the plasma membrane; may be involved in regulation of lifespan; required for maturation of Gas1p and Pho8p, proposed to be involved in protein trafficking; PGA3 has a paralog, AIM33, that arose from the whole genome duplication	753	Plasma membrane-associated coenzyme Q6 reductase PGA3 OS=Saccharomyces cerevisiae (strain ATCC 204508 / S288c) GN=PGA3 PE=1 SV=1	PGA3_YEAST	35 kDa	NA	0.15	-0.24	12.788	0.507843	12.71	12.52	13.25	12.82	13.33	12.65	12.29	12.52	12.79	13
YMR302C	YME2	13	870073	872625	C	PRP12|RNA12	Integral inner mitochondrial membrane protein; role in maintaining mitochondrial nucleoid structure and number; mutants exhibit an increased rate of mitochondrial DNA escape; shows some sequence similarity to exonucleases	396	Mitochondrial escape protein 2 OS=Saccharomyces cerevisiae (strain ATCC 204508 / S288c) GN=YME2 PE=1 SV=1	YME2_YEAST	97 kDa	TRUE	0.037	-0.24	12.266	0.243223	12.14	12.18	12.92	12.51	12.27	12.08	12.05	12.1	12.31	12.1
YNL180C	RHO5	14	299654	300649	C	Rho family GTPase RHO5|YNS0	Non-essential small GTPase of the Rho/Rac family of Ras-like proteins; RAC1 ortholog; regulated by phosphorylation and ubiquitination; likely involved in protein kinase C (Pkc1p)-dependent signal transduction pathway that controls cell integrity	24	GTP-binding protein RHO5 OS=Saccharomyces cerevisiae (strain ATCC 204508 / S288c) GN=RHO5 PE=1 SV=2	RHO5_YEAST	37 kDa	NA	0.0001	-0.24	13.52	0.00438983	13.69	13.75	13.71	13.48	13.56	13.51	13.38	13.39	13.4	13.33
YNL313C	EMW1	14	45308	48022	C	tetratricopeptide repeat-containing protein EMW1	Essential conserved protein with a role in cell wall integrity; contains six TPR (tetratricopeptide repeat) domains clustered in the C-terminal region; conditional mutant is suppressed by overexpression of GFA1; protein abundance increases in response to DNA replication stress	1061	Essential for maintenance of the cell wall protein 1 OS=Saccharomyces cerevisiae (strain ATCC 204508 / S288c) GN=EMW1 PE=1 SV=1	EMW1_YEAST	102 kDa	NA	0.26	-0.24	13.751	0.635283	13.61	13.15	14.5	14.02	14	13.86	13.28	13.46	14.14	13.49
YOR317W	FAA1	15	909343	911445	W	long-chain fatty acid-CoA ligase FAA1	Long chain fatty acyl-CoA synthetase; activates fatty acids with a preference for C12:0-C16:0 chain lengths; role in the competitive import of long-chain fatty acids and sphingoid long-chain bases; accounts for most acyl-CoA synthetase activity; localizes to lipid particles and the plasma membrane; role in sphingolipid-to-glycerolipid metabolism; forms ER foci upon replication stress; faa1 faa4 d…	71	Long-chain-fatty-acid--CoA ligase 1 OS=Saccharomyces cerevisiae (strain ATCC 204508 / S288c) GN=FAA1 PE=1 SV=1	LCF1_YEAST	78 kDa	TRUE	0.00025	-0.24	14.255	0.00938406	14.15	14.02	14.76	14.53	14.5	14.21	13.84	14.01	14.4	14.13
YBL076C	ILS1	2	81043	84261	C	isoleucine--tRNA ligase ILS1	Cytoplasmic isoleucine-tRNA synthetase; target of the G1-specific inhibitor reveromycin A	67	Isoleucine--tRNA ligase, cytoplasmic OS=Saccharomyces cerevisiae (strain ATCC 204508 / S288c) GN=ILS1 PE=1 SV=1	SYIC_YEAST	123 kDa	TRUE	0.00019	-0.23	13.909	0.00757077	13.74	13.39	14.68	14.11	14.25	13.87	13.5	13.71	14.21	13.63
YBR069C	TAT1	2	376574	378433	C	amino acid transporter TAT1|VAP1|TAP1	Amino acid transporter for valine, leucine, isoleucine, and tyrosine; low-affinity tryptophan and histidine transporter; overexpression confers FK506 and FTY720 resistance; protein abundance increases in response to DNA replication stress	1103	Valine/tyrosine/tryptophan amino-acid permease 1 OS=Saccharomyces cerevisiae (strain ATCC 204508 / S288c) GN=TAT1 PE=1 SV=1	TAT1_YEAST	69 kDa	NA	0.28	-0.23	11.328	0.649821	11.35	10.75	12.24	11.53	11.52	10.98	11.14	11.14	11.43	11.2
YDR093W	DNF2	4	631282	636120	W	aminophospholipid-translocating P4-type ATPase DNF2	Aminophospholipid translocase (flippase); type 4 P-type ATPase; involved in phospholipid translocation, contributing to endocytosis, protein transport, and cellular polarization; localizes primarily to the plasma membrane; localizes to the shmoo tip where it has a redundant role in the cellular response to mating pheromone; DNF2 has a paralog, DNF1, that arose from the whole genome duplication	510	Phospholipid-transporting ATPase DNF2 OS=Saccharomyces cerevisiae (strain ATCC 204508 / S288c) GN=DNF2 PE=1 SV=1	ATC4_YEAST	183 kDa	TRUE	0.065	-0.23	12.219	0.333366	12.17	11.93	12.82	12.46	12.33	12.1	12.17	12	12.2	12.01
YDR303C	RSC3	4	1068729	1071386	C		Component of the RSC chromatin remodeling complex; essential gene required for maintenance of proper ploidy and regulation of ribosomal protein genes and the cell wall/stress response; RSC3 has a paralog, RSC30, that arose from the whole genome duplication	678	Chromatin structure-remodeling complex protein RSC3 OS=Saccharomyces cerevisiae (strain ATCC 204508 / S288c) GN=RSC3 PE=1 SV=1	RSC3_YEAST	102 kDa	NA	0.12	-0.23	12.422	0.456388	12.35	12.15	12.96	12.78	12.43	12.29	12.37	12.18	12.5	12.21
YER021W	RPN3	5	196948	198519	W	proteasome regulatory particle lid subunit RPN3|SUN2	Essential non-ATPase regulatory subunit of the 26S proteasome lid; similar to the p58 subunit of the human 26S proteasome; temperature-sensitive alleles cause metaphase arrest, suggesting a role for the proteasome in cell cycle control	476	26S proteasome regulatory subunit RPN3 OS=Saccharomyces cerevisiae (strain ATCC 204508 / S288c) GN=RPN3 PE=1 SV=5	RPN3_YEAST	60 kDa	NA	0.056	-0.23	13.589	0.306638	13.41	13.13	14.18	13.79	13.98	13.74	13.06	13.42	13.78	13.4
YER166W	DNF1	5	512744	517459	W	aminophospholipid-translocating P4-type ATPase DNF1	Aminophospholipid translocase (flippase); type 4 P-type ATPase; involved in phospholipid translocation, contributing to endocytosis, protein transport, and cellular polarization; localizes primarily to the plasma membrane; localizes to the shmoo tip where it has a redundant role in the cellular response to mating pheromone; DNF1 has a paralog, DNF2, that arose from the whole genome duplication	590	Phospholipid-transporting ATPase DNF1 OS=Saccharomyces cerevisiae (strain ATCC 204508 / S288c) GN=DNF1 PE=1 SV=2	ATC5_YEAST	178 kDa	TRUE	0.092	-0.23	11.806	0.406621	11.58	11.46	12.42	12.18	11.91	11.56	11.69	11.5	12.02	11.74
YGR157W	CHO2	7	802440	805049	W	phosphatidylethanolamine N-methyltransferase|PEM1	Phosphatidylethanolamine methyltransferase (PEMT); catalyzes the first step in the conversion of phosphatidylethanolamine to phosphatidylcholine during the methylation pathway of phosphatidylcholine biosynthesis	283	Phosphatidylethanolamine N-methyltransferase OS=Saccharomyces cerevisiae (strain ATCC 204508 / S288c) GN=CHO2 PE=1 SV=1	CHO2_YEAST	101 kDa	NA	0.017	-0.23	12.892	0.153951	12.85	12.39	13.54	13.09	13.13	12.75	12.7	12.52	13.16	12.79
YIL126W	STH1	9	117992	122071	W	RSC chromatin remodeling complex ATPase subunit STH1|NPS1	ATPase component of the RSC chromatin remodeling complex; required for expression of early meiotic genes; promotes base excision repair in chromatin; essential helicase-related protein homologous to Snf2p	564	Nuclear protein STH1/NPS1 OS=Saccharomyces cerevisiae (strain ATCC 204508 / S288c) GN=STH1 PE=1 SV=1	STH1_YEAST	157 kDa	TRUE	0.084	-0.23	13.743	0.3885	13.6	13.27	14.32	13.95	14.06	13.64	13.49	13.52	13.95	13.63
YMR012W	CLU1	13	291134	294967	W	translation initiation factor 3 subunit CLU1|TIF31	Subunit of the eukaryotic translation initiation factor 3 (eIF3); component of unknown function; deletion causes defects in mitochondrial organization but not in growth or translation initiation; can rescue cytokinesis and mitochondrial organization defects of the Dictyostelium cluA- mutant; eIF3 is also involved in programmed stop codon readthrough	92	Clustered mitochondria protein 1 OS=Saccharomyces cerevisiae (strain ATCC 204508 / S288c) GN=CLU1 PE=1 SV=1	CLU_YEAST	145 kDa	TRUE	0.00064	-0.23	13.694	0.0181119	13.47	13.26	14.34	13.98	13.98	13.68	13.2	13.52	13.98	13.53
YNL141W	AAH1	14	359596	360639	W	adenine deaminase	Adenine deaminase (adenine aminohydrolase); converts adenine to hypoxanthine; involved in purine salvage; transcriptionally regulated by nutrient levels and growth phase; Aah1p degraded upon entry into quiescence via SCF and the proteasome	34	Adenine deaminase OS=Saccharomyces cerevisiae (strain ATCC 204508 / S288c) GN=AAH1 PE=1 SV=1	ADE_YEAST	40 kDa	NA	0.0001	-0.23	13.617	0.00438983	13.8	13.85	13.67	13.74	13.63	13.44	13.5	13.51	13.47	13.56
YOL090W	MSH2	15	147382	150276	W	mismatch repair ATPase MSH2|PMS5	Protein that binds to DNA mismatches; forms heterodimers with Msh3p and Msh6p that bind to DNA mismatches to initiate the mismatch repair process; contains a Walker ATP-binding motif required for repair activity and involved in interstrand cross-link repair; Msh2p-Msh6p binds to and hydrolyzes ATP	504	DNA mismatch repair protein MSH2 OS=Saccharomyces cerevisiae (strain ATCC 204508 / S288c) GN=MSH2 PE=1 SV=2	MSH2_YEAST	109 kDa	NA	0.064	-0.23	12.685	0.330858	12.51	12.26	13.22	12.97	12.95	12.61	12.54	12.44	12.77	12.58
YOR254C	SEC63	15	805032	807023	C	protein-transporting protein SEC63|PTL1	Essential subunit of Sec63 complex; with Sec61 complex, Kar2p/BiP and Lhs1p forms a channel competent for SRP-dependent and post-translational SRP-independent protein targeting and import into the ER; other members are Sec62p, Sec66p, and Sec72p	310	Protein translocation protein SEC63 OS=Saccharomyces cerevisiae (strain ATCC 204508 / S288c) GN=SEC63 PE=1 SV=2	SEC63_YEAST	75 kDa	NA	0.021	-0.23	13.383	0.174888	13.39	13.01	13.92	13.56	13.59	13.31	13.11	13.11	13.55	13.28
YPL009C	RQC2	16	535820	538936	C	TAE2	Component of RQC, which mediates nascent chain degradation; RQC (ribosome quality control complex) is a ribosome-bound complex required for degradation of polypeptides arising from stalled translation; recruits alanine- and threonine-charged tRNA to the A site and directs the elongation of nascent chains independently of mRNA or 40S subunits; monitors translation stress and signals this to Hsf1p	337	Ribosome quality control complex subunit 2 OS=Saccharomyces cerevisiae (strain ATCC 204508 / S288c) GN=RQC2 PE=1 SV=1	RQC2_YEAST	119 kDa	NA	0.026	-0.23	12.267	0.199231	12.15	11.82	12.93	12.49	12.55	12.22	11.73	12.26	12.46	12.06
YPL135W	ISU1	16	297553	298050	W	iron-binding protein ISU1|NUA1	Conserved protein of the mitochondrial matrix; performs a scaffolding function during assembly of iron-sulfur clusters, interacts physically and functionally with yeast frataxin (Yfh1p); ISU1 has a paralog, ISU2, that arose from the whole genome duplication; isu1 isu2 double mutant is inviable; human homolog ISCU implicated in mitochondrial myopathy, can complement isu1 isu2 double mutant	398	Iron sulfur cluster assembly protein 1, mitochondrial OS=Saccharomyces cerevisiae (strain ATCC 204508 / S288c) GN=ISU1 PE=1 SV=1	ISU1_YEAST	18 kDa	TRUE	0.037	-0.23	14.584	0.243223	14.75	14.82	14.69	14.67	14.53	14.42	14.67	14.4	14.54	14.35
YBR283C	SSH1	2	768943	770415	C		Subunit of the Ssh1 translocon complex; Sec61p homolog involved in co-translational pathway of protein translocation; not essential	732	Sec sixty-one protein homolog OS=Saccharomyces cerevisiae (strain ATCC 204508 / S288c) GN=SSH1 PE=1 SV=1	SSH1_YEAST	53 kDa	NA	0.14	-0.22	13.202	0.488679	13.09	12.55	14.09	13.5	13.42	13.22	12.58	12.93	13.52	13.12
YDL140C	RPO21	4	205360	210561	C	DNA-directed RNA polymerase II core subunit RPO21|B220|SUA8|RPB220|RPB1	RNA polymerase II largest subunit B220; part of central core; phosphorylation of C-terminal heptapeptide repeat domain regulates association with transcription and splicing factors; similar to bacterial beta-prime	62	DNA-directed RNA polymerase II subunit RPB1 OS=Saccharomyces cerevisiae (strain ATCC 204508 / S288c) GN=RPO21 PE=1 SV=2	RPB1_YEAST	192 kDa	TRUE	0.00011	-0.22	13.079	0.00474833	12.98	12.78	13.59	13.33	13.31	12.94	12.81	12.88	13.29	12.88
YDL193W	NUS1	4	114672	115799	W	ditrans,polycis-polyprenyl diphosphate synthase	Forms dehydrodolichyl diphosphate syntase complex with RER2 or SRT1; tet-repressible mutant shows accumulation of hypoglycosylated forms of CPY, suggesting that Nus1p may be involved in protein trafficking; mutations in human homolog NUS1 have been implicated in congenital scoliosis, neurological impairment, refractory epilepsy, hearing deficit, and visual impairment; human cis-prenyltransferase …	1243	Dehydrodolichyl diphosphate syntase complex subunit NUS1 OS=Saccharomyces cerevisiae (strain ATCC 204508 / S288c) GN=NUS1 PE=1 SV=1	UPPS_YEAST	43 kDa	NA	0.34	-0.22	12.388	0.701673	12.08	11.8	13.18	12.72	12.69	12.55	11.97	11.89	12.77	12.23
YDR031W	MIX14	4	503498	503863	W	MIC14	Mitochondrial intermembrane space protein of unknown function; required for normal oxygen consumption; contains twin cysteine-x9-cysteine motifs; protein abundance increases in response to DNA replication stress	428	Mitochondrial intermembrane space cysteine motif-containing protein MIX14 OS=Saccharomyces cerevisiae (strain ATCC 204508 / S288c) GN=MIX14 PE=4 SV=1	MIX14_YEAST	14 kDa	NA	0.043	-0.22	13.512	0.262665	13.64	13.82	13.68	13.63	13.33	13.33	13.33	13.5	13.54	13.32
YDR186C	SND1	4	832859	835492	C		Protein involved in SRP-independent targeting of substrates to the ER; component of an alternative ER targeting pathway that has partial functional redundancy with the GET pathway; preference for substrates with downstream transmembrane domains; interacts with Env10p/Snd2p and Pho88p/Snd3p; can compensate for loss of SRP; may interact with ribosomes, based on co-purification experiments; GFP-fusi…	955	Uncharacterized protein YDR186C OS=Saccharomyces cerevisiae (strain ATCC 204508 / S288c) GN=YDR186C PE=1 SV=1	YDR86_YEAST	98 kDa	NA	0.22	-0.22	10.965	0.594161	10.88	10.97	11.21	10.93	11.47	10.91	11.2	10.43	11.15	10.5
YGR189C	CRH1	7	876669	878192	C	transglycosylase	Chitin transglycosylase; functions in the transfer of chitin to beta(1-6) and beta(1-3) glucans in the cell wall; similar and functionally redundant to Utr2; localizes to sites of polarized growth; expression induced by cell wall stress	145	Probable glycosidase CRH1 OS=Saccharomyces cerevisiae (strain ATCC 204508 / S288c) GN=CRH1 PE=1 SV=1	CRH1_YEAST	53 kDa	NA	0.001	-0.22	14.222	0.0181119	14.4	14.22	14.86	14.18	14.14	14.06	14.16	13.96	14.14	14.1
YGR266W	YGR266W	7	1022656	1024761	W		Protein of unknown function; predicted to contain a single transmembrane domain; mutant has increased aneuploidy tolerance; localized to both the mitochondrial outer membrane and the plasma membrane; protein abundance increases in response to DNA replication stress	529	Uncharacterized protein YGR266W OS=Saccharomyces cerevisiae (strain ATCC 204508 / S288c) GN=YGR266W PE=1 SV=1	YG5L_YEAST	81 kDa	NA	0.072	-0.22	11.474	0.3552	11.2	11.24	11.96	11.75	11.72	11.51	11.05	11.27	11.64	11.4
YML001W	YPT7	13	267174	267800	W	Rab family GTPase YPT7|VAM4|AST4	Rab family GTPase; GTP-binding protein of the rab family; required for homotypic fusion event in vacuole inheritance, for endosome-endosome fusion; localizes to sites of contact between the vacuole and mitochondria (vCLAMPs); interacts with the cargo selection/retromer complex for retrograde sorting; similar to mammalian Rab7	36	GTP-binding protein YPT7 OS=Saccharomyces cerevisiae (strain ATCC 204508 / S288c) GN=YPT7 PE=1 SV=1	YPT7_YEAST	23 kDa	NA	0.0001	-0.22	14.681	0.00438983	14.71	14.55	15.21	14.78	14.78	14.66	14.46	14.42	14.79	14.45
YMR145C	NDE1	13	554793	556475	C	NADH-ubiquinone reductase (H(+)-translocating) NDE1|NDH1	Mitochondrial external NADH dehydrogenase; type II NAD(P)H:quinone oxidoreductase that catalyzes the oxidation of cytosolic NADH; Nde1p and Nde2p provide cytosolic NADH to the mitochondrial respiratory chain; NDE1 has a paralog, NDE2, that arose from the whole genome duplication	90	External NADH-ubiquinone oxidoreductase 1, mitochondrial OS=Saccharomyces cerevisiae (strain ATCC 204508 / S288c) GN=NDE1 PE=1 SV=1	NDH1_YEAST	63 kDa	TRUE	0.0006	-0.22	13.94	0.0176591	13.85	13.62	14.65	14.11	14.15	13.93	13.47	13.75	14.09	13.78
YMR305C	SCW10	13	879063	880232	C	putative family 17 glucosidase	Cell wall protein with similarity to glucanases; may play a role in conjugation during mating based on mutant phenotype and its regulation by Ste12p; SWC10 has a paralog, SCW4, that arose from the whole genome duplication	160	Probable family 17 glucosidase SCW10 OS=Saccharomyces cerevisiae (strain ATCC 204508 / S288c) GN=SCW10 PE=1 SV=1	SCW10_YEAST	40 kDa	NA	0.002	-0.22	14.04	0.0329936	14.19	14.25	14.2	14	13.97	13.69	14.4	13.99	13.93	13.78
YNL036W	NCE103	14	559814	560479	W	carbonate dehydratase NCE103|NCE3	Carbonic anhydrase; metalloenzyme that catalyzes CO2 hydration to bicarbonate, which is an important metabolic substrate, and protons; not expressed under conditions of high CO2, such as inside a growing colony, but transcription is induced in response to low CO2 levels, such as on the colony surface in ambient air; poorly transcribed under aerobic conditions and at an undetectable level under an…	535	Carbonic anhydrase OS=Saccharomyces cerevisiae (strain ATCC 204508 / S288c) GN=NCE103 PE=1 SV=1	CAN_YEAST	25 kDa	NA	0.073	-0.22	13.164	0.356736	13.39	13.6	13.48	13.07	12.97	13.07	12.84	13.18	13.14	12.9
YBR037C	SCO1	2	310565	311452	C	Cu-binding protein SCO1|PET161	Copper-binding protein of mitochondrial inner membrane; required for cytochrome c oxidase activity and respiration; may function to deliver copper to cytochrome c oxidase; similar to thioredoxins; SCO1 has a paralog, SCO2, that arose from the whole genome duplication	327	Protein SCO1, mitochondrial OS=Saccharomyces cerevisiae (strain ATCC 204508 / S288c) GN=SCO1 PE=1 SV=1	SCO1_YEAST	33 kDa	NA	0.023	-0.21	12.012	0.184427	12.34	12.21	11.94	12.19	11.95	11.89	11.99	11.7	11.92	11.99
YCL045C	EMC1	3	44623	46905	C		Member of conserved endoplasmic reticulum membrane complex; involved in efficient folding of proteins in the ER; null mutant displays induction of the unfolded protein response; interacts with Gal80p; homologous to worm H17B01.4/EMC-1, fly CG2943, and human KIAA0090	434	ER membrane protein complex subunit 1 OS=Saccharomyces cerevisiae (strain ATCC 204508 / S288c) GN=EMC1 PE=1 SV=1	EMC1_YEAST	87 kDa	NA	0.045	-0.21	13.594	0.271047	13.45	13.2	14.14	13.82	13.87	13.56	13.2	13.31	13.87	13.52
YCR093W	CDC39	3	280117	286443	W	CCR4-NOT core subunit CDC39|SMD6|ROS1|NOT1	Subunit of the CCR4-NOT1 core complex; this complex has multiple roles in the regulation of mRNA levels including regulation of transcription and destabilization of mRNA by deadenylation; basal transcription factor that increases initiation and elongation; activates the ATPase activity of Dhh1p, resulting in processing body disassembly	1942	General negative regulator of transcription subunit 1 OS=Saccharomyces cerevisiae (strain ATCC 204508 / S288c) GN=CDC39 PE=1 SV=3	NOT1_YEAST	240 kDa	TRUE	0.66	-0.21	11.27	0.885699	11.22	10.58	11.71	11.52	11.52	11.15	11.18	11.15	11.63	11.04
YDR309C	GIC2	4	1079048	1080199	C		Redundant rho-like GTPase Cdc42p effector; involved in initiation of budding and cellular polarization; interacts with Cdc42p via the Cdc42/Rac-interactive binding (CRIB) domain and with PI(4,5)P2 via a polybasic region; GIC2 has a paralog, GIC1, that arose from the whole genome duplication	300	GTPase-interacting component 2 OS=Saccharomyces cerevisiae (strain ATCC 204508 / S288c) GN=GIC2 PE=1 SV=1	GIC2_YEAST	43 kDa	NA	0.019	-0.21	11.216	0.165134	11.51	11.47	11.15	11.29	11.14	10.95	11.52	11.08	11.09	10.96
YDR483W	KRE2	4	1421157	1422485	W	alpha-1,2-mannosyltransferase KRE2|MNT1	Alpha1,2-mannosyltransferase of the Golgi; involved in protein mannosylation; KRE2 has a paralog, KTR6, that arose from the whole genome duplication	513	Glycolipid 2-alpha-mannosyltransferase OS=Saccharomyces cerevisiae (strain ATCC 204508 / S288c) GN=KRE2 PE=1 SV=1	KRE2_YEAST	51 kDa	TRUE	0.066	-0.21	16.066	0.336496	15.96	15.64	16.67	16.39	16.28	16.14	15.51	15.88	16.3	15.89
YER088C	DOT6	5	333176	335188	C	PBF2	Protein involved in rRNA and ribosome biogenesis; activated in stochastic pulses of nuclear localization; binds polymerase A and C motif; subunit of the RPD3L histone deacetylase complex; has chromatin specific SANT domain; involved in telomeric gene silencing and filamentation; relative distribution to the nucleus increases upon DNA replication stress	88	Transcriptional regulatory protein DOT6 OS=Saccharomyces cerevisiae (strain ATCC 204508 / S288c) GN=DOT6 PE=1 SV=1	DOT6_YEAST	73 kDa	TRUE	0.00057	-0.21	10.078	0.016969	10.12	10.36	10.25	10.16	10.07	9.81	10.14	9.89	10.06	9.92
YGR019W	UGA1	7	525229	526644	W	4-aminobutyrate transaminase	Gamma-aminobutyrate (GABA) transaminase; also known as 4-aminobutyrate aminotransferase; involved in the 4-aminobutyrate and glutamate degradation pathways; required for normal oxidative stress tolerance and nitrogen utilization; protein abundance increases in response to DNA replication stress	32	4-aminobutyrate aminotransferase OS=Saccharomyces cerevisiae (strain ATCC 204508 / S288c) GN=UGA1 PE=1 SV=2	GABAT_YEAST	53 kDa	NA	0.0001	-0.21	14.332	0.00438983	14.41	14.62	14.48	14.29	14.52	14.39	13.71	14.2	14.2	14.5
YHR007C	ERG11	8	120091	121683	C	sterol 14-demethylase|CYP51	Lanosterol 14-alpha-demethylase; catalyzes C-14 demethylation of lanosterol to form 4,4''-dimethyl cholesta-8,14,24-triene-3-beta-ol in ergosterol biosynthesis pathway; transcriptionally down-regulated when ergosterol is in excess; member of cytochrome P450 family; associated and coordinately regulated with the P450 reductase Ncp1p; human CYP51A1 functionally complements the lethality of the erg1…	498	Lanosterol 14-alpha demethylase OS=Saccharomyces cerevisiae (strain ATCC 204508 / S288c) GN=ERG11 PE=1 SV=1	CP51_YEAST	61 kDa	NA	0.06	-0.21	13.556	0.315213	13.6	13.26	14.18	13.67	13.66	13.51	13.4	13.08	13.8	13.4
YHR106W	TRR2	8	325598	326626	W	thioredoxin-disulfide reductase TRR2	Mitochondrial thioredoxin reductase; involved in protection against oxidative stress, required with Glr1p to maintain the redox state of Trx3p; contains active-site motif (CAVC) present in prokaryotic orthologs; binds NADPH and FAD; TRR2 has a paralog, TRR1, that arose from the whole genome duplication	355	Thioredoxin reductase 2, mitochondrial OS=Saccharomyces cerevisiae (strain ATCC 204508 / S288c) GN=TRR2 PE=1 SV=1	TRXB2_YEAST	37 kDa	TRUE	0.03	-0.21	13.086	0.220739	13.26	13.43	13.12	13.11	13.05	13.12	12.98	12.93	12.94	12.92
YIL031W	ULP2	9	292633	295737	W	SUMO protease ULP2|SMT4	Peptidase that deconjugates Smt3/SUMO-1 peptides from proteins; plays a role in chromosome cohesion at centromeric regions and recovery from checkpoint arrest induced by DNA damage or DNA replication defects; potential Cdc28p substrate; human homolog PML implicated in promyelocytic leukemia can partially complement yeast null mutant	866	Ubiquitin-like-specific protease 2 OS=Saccharomyces cerevisiae (strain ATCC 204508 / S288c) GN=ULP2 PE=1 SV=1	ULP2_YEAST	117 kDa	NA	0.19	-0.21	15.671	0.560478	15.98	15.79	15.31	15.79	15.92	15.42	15.82	15.51	15.49	15.68
YIL121W	QDR2	9	132244	133872	W	cation transporter	Plasma membrane transporter of the major facilitator superfamily; member of the 12-spanner drug:H(+) antiporter DHA1 family; exports copper; has broad substrate specificity and can transport many mono- and divalent cations; transports a variety of drugs and is required for resistance to quinidine, barban, cisplatin, and bleomycin; contributes to potassium homeostasis; expression is regulated by c…	1084	Quinidine resistance protein 2 OS=Saccharomyces cerevisiae (strain ATCC 204508 / S288c) GN=QDR2 PE=1 SV=1	QDR2_YEAST	60 kDa	NA	0.27	-0.21	12.921	0.64333	12.86	12.47	13.68	13.08	13.12	12.72	12.56	12.63	13.17	12.92
YML031W	NDC1	13	214189	216156	W		Subunit of the transmembrane ring of the nuclear pore complex (NPC); contributes to nucleocytoplasmic transport, NPC biogenesis and spindle pole body duplication; homologous to human NDC1	951	Nucleoporin NDC1 OS=Saccharomyces cerevisiae (strain ATCC 204508 / S288c) GN=NDC1 PE=1 SV=1	NDC1_YEAST	74 kDa	NA	0.22	-0.21	12.099	0.594161	12.09	11.56	12.62	12.21	12.52	11.93	12	11.85	12.43	11.78
YML061C	PIF1	13	148953	151532	C	DNA helicase PIF1|TST1	DNA helicase, potent G-quadruplex DNA binder/unwinder; possesses strand annealing activity; promotes DNA synthesis during break-induced replication; important for crossover recombination; translation from different start sites produces mitochondrial and nuclear forms; nuclear form is a catalytic inhibitor of telomerase; mitochondrial form involved in DNA repair and recombination; mutations affect…	580	Isoform Nuclear of ATP-dependent DNA helicase PIF1 OS=Saccharomyces cerevisiae (strain ATCC 204508 / S288c) GN=PIF1	PIF1_YEAST	?	TRUE	0.09	-0.21	11.12	0.404687	11.18	10.9	11.62	11.31	11.15	11.19	10.87	10.92	11.21	10.85
YNL287W	SEC21	14	91994	94801	W	coatomer subunit gamma	Gamma subunit of coatomer; coatomer is a heptameric protein complex that together with Arf1p forms the COPI coat; involved in ER to Golgi transport of selective cargo	131	Coatomer subunit gamma OS=Saccharomyces cerevisiae (strain ATCC 204508 / S288c) GN=SEC21 PE=1 SV=2	COPG_YEAST	105 kDa	NA	0.001	-0.21	13.957	0.0181119	13.87	13.74	14.44	14.14	14.15	13.96	13.6	13.74	14.13	13.8
YPL032C	SVL3	16	488887	491364	C		Protein of unknown function; mutant phenotype suggests a potential role in vacuolar function; green fluorescent protein (GFP)-fusion protein localizes to the cell periphery, cytoplasm, bud, and bud neck; relocalizes from bud neck to cytoplasm upon DNA replication stress; SVL3 has a paralog, PAM1, that arose from the whole genome duplication	196	Styryl dye vacuolar localization protein 3 OS=Saccharomyces cerevisiae (strain ATCC 204508 / S288c) GN=SVL3 PE=1 SV=1	SVL3_YEAST	92 kDa	TRUE	0.005	-0.21	13.155	0.065736	13.13	13	13.63	13.28	13.33	13.19	12.83	12.98	13.2	12.98
YBR074W	PFF1	2	386286	389216	W	YBR075W	Multi-spanning vacuolar membrane protease; glycosylated transmembrane protein bearing homology to the M28 family of metalloproteases; has a lumenal-facing protease domain; proposed role in vacuole physiology	1544	Vacuolar membrane protease OS=Saccharomyces cerevisiae (strain ATCC 204508 / S288c) GN=PFF1 PE=1 SV=3	PFF1_YEAST	111 kDa	NA	0.48	-0.2	13.847	0.8	13.58	13.24	14.52	14.09	14.17	13.8	13.77	13.53	14.12	13.65
YDR074W	TPS2	4	593893	596583	W	trehalose-phosphatase TPS2|PFK3|HOG2	Phosphatase subunit of the trehalose-6-P synthase/phosphatase complex; involved in synthesis of the storage carbohydrate trehalose; expression is induced by stress conditions and repressed by the Ras-cAMP pathway; protein abundance increases in response to DNA replication stress	1072	Trehalose-phosphatase OS=Saccharomyces cerevisiae (strain ATCC 204508 / S288c) GN=TPS2 PE=1 SV=3	TPS2_YEAST	103 kDa	NA	0.27	-0.2	12.82	0.64333	12.62	12.4	13.43	13.04	13.06	12.84	12.46	12.74	13	12.61
YDR181C	SAS4	4	825910	827355	C		Subunit of the SAS complex (Sas2p, Sas4p, Sas5p); acetylates free histones and nucleosomes and regulates transcriptional silencing; required for the HAT activity of Sas2p	490	Something about silencing protein 4 OS=Saccharomyces cerevisiae (strain ATCC 204508 / S288c) GN=SAS4 PE=1 SV=1	SAS4_YEAST	55 kDa	NA	0.059	-0.2	12.616	0.313135	12.79	12.88	12.4	12.83	12.73	12.58	12.28	12.56	12.39	12.72
YEL031W	SPF1	5	90258	93905	W	ion-transporting P-type ATPase SPF1|PER9|PIO1|COD1	P-type ATPase, ion transporter of the ER membrane; required to maintain normal lipid composition of intracellular compartments and proper targeting of mitochondrial outer membrane tail-anchored proteins; involved in ER function and Ca2+ homeostasis; required for regulating Hmg2p degradation; confers sensitivity to a killer toxin (SMKT) produced by Pichia farinosa KK1	191	Manganese-transporting ATPase 1 OS=Saccharomyces cerevisiae (strain ATCC 204508 / S288c) GN=SPF1 PE=1 SV=1	ATC6_YEAST	135 kDa	NA	0.005	-0.2	14.109	0.065736	13.98	13.58	14.87	14.33	14.36	14.09	13.79	13.81	14.35	13.93
YGR047C	TFC4	7	586392	589469	C	transcription factor TFIIIC subunit TFC4|tau 131|PCF1	Subunit of RNA polymerase III transcription initiation factor complex; one of six subunits of RNA polymerase III transcription initiation factor complex (TFIIIC); part of the TauA domain of TFIIIC that binds BoxA DNA promoter sites of tRNA and similar genes; has TPR motifs; human homolog is TFIIIC-102	1260	Transcription factor tau 131 kDa subunit OS=Saccharomyces cerevisiae (strain ATCC 204508 / S288c) GN=TFC4 PE=1 SV=1	TFC4_YEAST	120 kDa	NA	0.34	-0.2	11.815	0.701673	11.8	11.15	12.59	12.12	11.87	11.7	11.58	11.57	12.18	11.59
YHR039C	MSC7	8	184875	186809	C	meiotic recombination directing protein	Protein of unknown function; green fluorescent protein (GFP)-fusion protein localizes to the endoplasmic reticulum; msc7 mutants are defective in directing meiotic recombination events to homologous chromatids	737	Putative aldehyde dehydrogenase-like protein YHR039C OS=Saccharomyces cerevisiae (strain ATCC 204508 / S288c) GN=MSC7 PE=1 SV=1	MSC7_YEAST	71 kDa	NA	0.14	-0.2	12.558	0.488679	12.4	12.11	13.34	12.73	12.89	12.58	12.17	12.15	12.77	12.44
YIL039W	TED1	9	278426	279847	W		GPI-glycan remodelase; conserved phosphoesterase domain-containing protein; acts together with Emp24p/Erv25p in cargo exit from the ER; functional ortholog of mammalian GPI-glycan remodelase PGAP5; deletion confers sensitivity to 4-(N-(S-glutathionylacetyl)amino) phenylarsenoxide (GSAO)	278	Protein TED1 OS=Saccharomyces cerevisiae (strain ATCC 204508 / S288c) GN=TED1 PE=1 SV=1	TED1_YEAST	55 kDa	NA	0.016	-0.2	13.32	0.150691	13.3	12.81	14.06	13.5	13.47	13.35	13.02	13.05	13.49	13.15
YIL136W	OM45	9	93619	94800	W		Mitochondrial outer membrane protein of unknown function; major constituent of the outer membrane, extending into the intermembrane space; interacts with porin (Por1p) and with Om14p; imported via the presequence pathway involving the TOM and TIM23 complexes, then assembled in the outer membrane by Mim1p; protein abundance increases in response to DNA replication stress	173	Mitochondrial outer membrane protein OM45 OS=Saccharomyces cerevisiae (strain ATCC 204508 / S288c) GN=OM45 PE=1 SV=2	OM45_YEAST	45 kDa	NA	0.004	-0.2	12.959	0.0578771	13.15	13.18	12.98	13.04	12.87	12.67	13.27	12.9	12.75	12.78
YJL005W	CYR1	10	425157	431237	W	adenylate cyclase|FIL1|TSM0185|SRA4|HSR1|CDC35	Adenylate cyclase; required for cAMP production and cAMP-dependent protein kinase signaling; the cAMP pathway controls a variety of cellular processes, including metabolism, cell cycle, stress response, stationary phase, and sporulation	1909	Adenylate cyclase OS=Saccharomyces cerevisiae (strain ATCC 204508 / S288c) GN=CYR1 PE=1 SV=2	CYAA_YEAST	228 kDa	NA	0.65	-0.2	10.435	0.879112	10.35	10.43	10.59	10.91	10.08	10.02	11.08	10.05	10.39	10.45
YKR002W	PAP1	11	443232	444938	W	polynucleotide adenylyltransferase PAP1	Poly(A) polymerase; one of three factors required for mRNA 3'-end polyadenylation, forms multiprotein complex with polyadenylation factor I (PF I), also required for mRNA nuclear export; may also polyadenylate rRNAs; required for gene looping	761	Poly(A) polymerase OS=Saccharomyces cerevisiae (strain ATCC 204508 / S288c) GN=PAP1 PE=1 SV=1	PAP_YEAST	65 kDa	NA	0.15	-0.2	13.215	0.507843	13.26	13.12	13.47	13.33	13.34	13.03	13.37	12.79	13.32	13.12
YLL048C	YBT1	12	41280	46265	C	bile acid-transporting ATPase YBT1|BAT1	Transporter of the ATP-binding cassette (ABC) family; involved in bile acid transport; negative regulator of vacuole fusion; regulates release of lumenal Ca2+ stores; similar to mammalian bile transporters; YBT1 has a paralog, VMR1, that arose from the whole genome duplication	1545	ATP-dependent bile acid permease OS=Saccharomyces cerevisiae (strain ATCC 204508 / S288c) GN=YBT1 PE=1 SV=2	YBT1_YEAST	189 kDa	TRUE	0.48	-0.2	13.509	0.8	13.41	13.03	14.14	13.74	13.85	13.42	13.11	13.26	13.7	13.43
YNL044W	YIP3	14	545268	545877	W		Protein localized to COPII vesicles; proposed to be involved in ER to Golgi transport; interacts with members of the Rab GTPase family and Yip1p; also interacts with Rtn1p	667	Prenylated Rab acceptor 1 OS=Saccharomyces cerevisiae (strain ATCC 204508 / S288c) GN=YIP3 PE=1 SV=2	PRA1_YEAST	19 kDa	NA	0.12	-0.2	14.772	0.456388	14.58	14.35	15.43	14.97	15.11	14.81	14.34	14.47	15.05	14.61
YNL123W	NMA111	14	394685	397678	W	YNM3	Serine protease and general molecular chaperone; involved in response to heat stress and promotion of apoptosis; may contribute to lipid homeostasis; sequence similarity to the mammalian Omi/HtrA2 family of serine proteases	418	Pro-apoptotic serine protease NMA111 OS=Saccharomyces cerevisiae (strain ATCC 204508 / S288c) GN=NMA111 PE=1 SV=1	NM111_YEAST	111 kDa	NA	0.042	-0.2	13.296	0.260239	13.03	12.83	13.87	13.53	13.62	13.36	12.95	13.12	13.58	13.07
YOL060C	MAM3	15	214017	216137	C		Protein required for normal mitochondrial morphology; has similarity to hemolysins	213	Protein MAM3 OS=Saccharomyces cerevisiae (strain ATCC 204508 / S288c) GN=MAM3 PE=1 SV=1	MAM3_YEAST	78 kDa	NA	0.006	-0.2	12.323	0.0736493	12.43	12.16	12.65	12.49	12.38	12.05	12.46	12.11	12.35	12.15
YOR038C	HIR2	15	402761	405388	C	SPT1	Subunit of HIR nucleosome assembly complex; involved in regulation of histone gene transcription; recruits Swi-Snf complexes to histone gene promoters; promotes heterochromatic gene silencing with Asf1p; relocalizes to the cytosol in response to hypoxia	783	Protein HIR2 OS=Saccharomyces cerevisiae (strain ATCC 204508 / S288c) GN=HIR2 PE=1 SV=2	HIR2_YEAST	98 kDa	NA	0.16	-0.2	12.119	0.51995	12.01	11.86	12.23	12.45	12.52	12	11.74	11.96	12.17	12.25
YOR125C	CAT5	15	559030	559731	C	putative monooxygenase CAT5|COQ7	Protein required for ubiquinone (Coenzyme Q) biosynthesis; localizes to the matrix face of the mitochondrial inner membrane in a large complex with ubiquinone biosynthetic enzymes; required for gluconeogenic gene activation	422	5-demethoxyubiquinone hydroxylase, mitochondrial OS=Saccharomyces cerevisiae (strain ATCC 204508 / S288c) GN=CAT5 PE=1 SV=2	COQ7_YEAST	26 kDa	NA	0.042	-0.2	13.98	0.260239	14.1	14.06	14.04	14.14	14.03	13.93	14	13.88	13.8	13.82
YPL093W	NOG1	16	370978	372921	W	putative GTPase NOG1	Putative GTPase; associates with free 60S ribosomal subunits in the nucleolus and is required for 60S ribosomal subunit biogenesis; constituent of 66S pre-ribosomal particles; member of the ODN family of nucleolar G-proteins	193	Nucleolar GTP-binding protein 1 OS=Saccharomyces cerevisiae (strain ATCC 204508 / S288c) GN=NOG1 PE=1 SV=1	NOG1_YEAST	74 kDa	NA	0.005	-0.2	12.867	0.065736	12.7	12.61	13.36	13.06	13.12	13.04	12.35	12.61	13.06	12.76
YPL160W	CDC60	16	246990	250262	W	leucine--tRNA ligase CDC60|LeuRS	Cytosolic leucyl tRNA synthetase; ligates leucine to the appropriate tRNA; human homolog LARS can complement yeast temperature-sensitive mutant at restrictive temperature	39	Leucine--tRNA ligase, cytoplasmic OS=Saccharomyces cerevisiae (strain ATCC 204508 / S288c) GN=CDC60 PE=1 SV=1	SYLC_YEAST	124 kDa	TRUE	0.0001	-0.2	13.432	0.00438983	13.23	13.04	14.02	13.6	13.73	13.46	13.12	13.26	13.62	13.24
YPR028W	YOP1	16	623527	624202	W	YIP2	Reticulon-interacting protein; ER integral membrane protein involved in the generation of tubular ER morphology; promotes membrane curvature; forms tubules in vitro; regulates the ER asymmetry-induced inheritance block during ER stress; role in ER-derived peroxisomal biogenesis; interacts with Yip1p to mediate membrane traffic and with Sey1p to maintain ER morphology; facilitates lipid exchange b…	970	Protein YOP1 OS=Saccharomyces cerevisiae (strain ATCC 204508 / S288c) GN=YOP1 PE=1 SV=3	YOP1_YEAST	20 kDa	NA	0.23	-0.2	13.682	0.607237	13.56	13.18	14.44	13.93	13.86	13.51	13.41	13.52	13.97	13.44
YDL145C	COP1	4	194571	198176	C	coatomer subunit alpha|SOO1|RET1|SEC33	Alpha subunit of COPI vesicle coatomer complex; complex surrounds transport vesicles in the early secretory pathway	105	Coatomer subunit alpha OS=Saccharomyces cerevisiae (strain ATCC 204508 / S288c) GN=COP1 PE=1 SV=2	COPA_YEAST	136 kDa	NA	0.00089	-0.19	13.435	0.0181119	13.26	13.04	13.96	13.71	13.75	13.28	13.17	13.26	13.65	13.27
YDR170C	SEC7	4	796193	802222	C	Arf family guanine nucleotide exchange factor SEC7	Guanine nucleotide exchange factor (GEF) for ADP ribosylation factors; involved in proliferation of the Golgi, intra-Golgi transport and ER-to-Golgi transport; found in the cytoplasm and on Golgi-associated coated vesicles	77	Protein transport protein SEC7 OS=Saccharomyces cerevisiae (strain ATCC 204508 / S288c) GN=SEC7 PE=1 SV=2	SEC7_YEAST	227 kDa	NA	0.00034	-0.19	13.102	0.0117413	12.99	12.82	13.62	13.35	13.24	12.92	12.95	12.92	13.22	12.99
YDR334W	SWR1	4	1135932	1140476	W	chromatin-remodeling protein SWR1	Swi2/Snf2-related ATPase; structural component of the SWR1 complex, which exchanges histone variant H2AZ (Htz1p) for chromatin-bound histone H2A; relocalizes to the cytosol in response to hypoxia; chronological aging factor that mediates lifespan extension by dietary restriction	507	Helicase SWR1 OS=Saccharomyces cerevisiae (strain ATCC 204508 / S288c) GN=SWR1 PE=1 SV=1	SWR1_YEAST	175 kDa	NA	0.065	-0.19	11.856	0.333366	11.93	12.01	11.9	11.9	12.07	11.56	11.71	11.64	11.9	11.94
YER167W	BCK2	5	518216	520771	W	CTR7	Serine/threonine-rich protein involved in PKC1 signaling pathway; protein kinase C (PKC1) signaling pathway controls cell integrity; overproduction suppresses pkc1 mutations	445	Protein BCK2 OS=Saccharomyces cerevisiae (strain ATCC 204508 / S288c) GN=BCK2 PE=1 SV=2	BCK2_YEAST	94 kDa	NA	0.049	-0.19	12.472	0.287127	12.59	12.39	12.56	12.66	12.58	12.38	12.53	12.38	12.4	12.25
YGL206C	CHC1	7	102543	107504	C	clathrin heavy chain|SWA5	Clathrin heavy chain; subunit of the major coat protein involved in intracellular protein transport and endocytosis; the clathrin triskelion is a trimeric molecule composed of three heavy chains that radiate from a vertex and three light chains which bind noncovalently near the vertex of the triskelion; the light chain (CLC1) is thought to regulate function	111	Clathrin heavy chain OS=Saccharomyces cerevisiae (strain ATCC 204508 / S288c) GN=CHC1 PE=1 SV=1	CLH_YEAST	187 kDa	NA	0.001	-0.19	13.484	0.0181119	13.32	13.04	14.11	13.73	13.73	13.46	13.25	13.19	13.72	13.29
YJL109C	UTP10	10	212000	217309	C	snoRNA-binding rRNA-processing protein UTP10	Nucleolar protein; component of the small subunit (SSU) processome containing the U3 snoRNA that is involved in processing of pre-18S rRNA; mutant has increased aneuploidy tolerance	280	U3 small nucleolar RNA-associated protein 10 OS=Saccharomyces cerevisiae (strain ATCC 204508 / S288c) GN=UTP10 PE=1 SV=1	UTP10_YEAST	200 kDa	NA	0.017	-0.19	14.047	0.153951	14.03	13.75	14.51	14.18	14.23	13.96	13.74	13.84	14.18	14.05
YJL154C	VPS35	10	131101	133935	C	retromer subunit VPS35|VPT7|GRD9	Endosomal subunit of membrane-associated retromer complex; required for retrograde transport; receptor that recognizes retrieval signals on cargo proteins, forms subcomplex with Vps26p and Vps29p that selects cargo proteins for retrieval; interacts with Ypt7p; overexpression of wild-type human VPS35 or Parkinson's-associated vps35-D686N or vps35-P299S variants complements Ni2+ resistance and Cd2+…	1361	Vacuolar protein sorting-associated protein 35 OS=Saccharomyces cerevisiae (strain ATCC 204508 / S288c) GN=VPS35 PE=1 SV=2	VPS35_YEAST	109 kDa	NA	0.39	-0.19	13.846	0.735688	13.74	13.63	14	14.25	14.11	13.5	13.88	13.47	13.85	14.03
YKL141W	SDH3	11	179667	180263	W	succinate dehydrogenase cytochrome b subunit SDH3|YKL4|CYB3	Subunit of succinate dehydrogenase and of TIM22 translocase; functions as cytochrome b subunit of succinate dehydrogenase, which couples oxidation of succinate to transfer of electrons to ubiquinone as part of the TCA cycle and the mitochondrial respiratory chain; also required for mitochondrial inner membrane protein import as part of the TIM22 complex; SDH3 has a paralog, SHH3, that arose from …	720	Succinate dehydrogenase [ubiquinone] cytochrome b subunit, mitochondrial OS=Saccharomyces cerevisiae (strain ATCC 204508 / S288c) GN=SDH3 PE=1 SV=1	SDH3_YEAST	22 kDa	NA	0.13	-0.19	12.954	0.470909	12.86	12.68	13.61	13.15	13.04	12.87	12.91	12.5	13.11	12.81
YKL215C	OXP1	11	26827	30687	C	5-oxoprolinase	5-oxoprolinase; enzyme is ATP-dependent and functions as a dimer; similar to mouse Oplah gene; green fluorescent protein (GFP)-fusion protein localizes to the cytoplasm; protein abundance increases in response to DNA replication stress	475	5-oxoprolinase OS=Saccharomyces cerevisiae (strain ATCC 204508 / S288c) GN=OXP1 PE=1 SV=2	OPLA_YEAST	140 kDa	NA	0.056	-0.19	13.082	0.306638	12.91	12.64	13.67	13.33	13.28	12.87	12.98	13.02	13.21	12.91
YLR398C	SKI2	12	915156	919019	C	SKI complex RNA helicase subunit SKI2	Ski complex component and putative RNA helicase; mediates 3'-5' RNA degradation by the cytoplasmic exosome; null mutants have superkiller phenotype of increased viral dsRNAs and are synthetic lethal with mutations in 5'-3' mRNA decay; mutations in the human ortholog, SKIV2L, causes Syndromic diarrhea/Trichohepatoenteric (SD/THE) syndrome	501	Antiviral helicase SKI2 OS=Saccharomyces cerevisiae (strain ATCC 204508 / S288c) GN=SKI2 PE=1 SV=2	SKI2_YEAST	146 kDa	NA	0.062	-0.19	12.617	0.32375	12.5	12.31	13.04	12.91	12.75	12.35	12.5	12.51	12.78	12.52
YML054C	CYB2	13	165533	167308	C	FCB2	Cytochrome b2 (L-lactate cytochrome-c oxidoreductase); component of the mitochondrial intermembrane space, required for lactate utilization; expression is repressed by glucose and anaerobic conditions	693	Cytochrome b2, mitochondrial OS=Saccharomyces cerevisiae (strain ATCC 204508 / S288c) GN=CYB2 PE=1 SV=1	CYB2_YEAST	66 kDa	NA	0.13	-0.19	11.894	0.470909	12.19	12.07	11.68	12.05	11.98	11.52	11.68	11.99	11.67	12.11
YMR070W	MOT3	13	409154	410626	W	[MOT3]|[MOT3+]|ROX7	Transcriptional repressor, activator; role in cellular adjustment to osmotic stress including modulation of mating efficiency; involved in repression of subset of hypoxic genes by Rox1p, repression of several DAN/TIR genes during aerobic growth, ergosterol biosynthetic genes in response to hyperosmotic stress; contributes to recruitment of Tup1p-Cyc8p general repressor to promoters; relocalizes t…	404	Transcriptional activator/repressor MOT3 OS=Saccharomyces cerevisiae (strain ATCC 204508 / S288c) GN=MOT3 PE=1 SV=1	MOT3_YEAST	54 kDa	NA	0.038	-0.19	14.92	0.245436	15.04	14.94	15.16	15.01	14.92	14.78	14.77	14.7	14.93	14.95
YOR165W	SEY1	15	644566	646896	W	dynamin-like GTPase SEY1	Dynamin-like GTPase that mediates homotypic ER fusion; has a role in ER morphology; interacts physically and genetically with Yop1p and Rtn1p; functional ortholog of the human atlastin ATL1, defects in which cause a form of the human disease hereditary spastic paraplegia; homolog of Arabidopsis RHD3	830	Protein SEY1 OS=Saccharomyces cerevisiae (strain ATCC 204508 / S288c) GN=SEY1 PE=1 SV=1	SEY1_YEAST	89 kDa	NA	0.17	-0.19	13.813	0.530482	13.61	13.31	14.36	14.1	14.04	13.76	13.62	13.51	14.08	13.74
YPL226W	NEW1	16	121767	125357	W		ATP binding cassette protein; cosediments with polysomes and is required for biogenesis of the small ribosomal subunit; Asn/Gln-rich rich region supports [NU+] prion formation and susceptibility to [PSI+] prion induction	57	[NU+] prion formation protein 1 OS=Saccharomyces cerevisiae (strain ATCC 204508 / S288c) GN=NEW1 PE=1 SV=1	NEW1_YEAST	134 kDa	NA	0.0001	-0.19	13.297	0.00438983	13.13	12.92	13.89	13.53	13.54	13.17	13.07	13.13	13.42	13.17
YPR010C	RPA135	16	577585	581196	C	DNA-directed RNA polymerase I core subunit RPA135|A135|SRP3|RRN2|RPA2	RNA polymerase I second largest subunit A135	166	DNA-directed RNA polymerase I subunit RPA135 OS=Saccharomyces cerevisiae (strain ATCC 204508 / S288c) GN=RPA135 PE=1 SV=1	RPA2_YEAST	136 kDa	NA	0.003	-0.19	13.696	0.047378	13.6	13.35	14.24	13.92	14	13.68	13.23	13.51	13.93	13.5
YPR160W	GPH1	16	861306	864014	W	glycogen phosphorylase	Glycogen phosphorylase required for the mobilization of glycogen; non-essential; regulated by cyclic AMP-mediated phosphorylation; phosphorylation by Cdc28p may coordinately regulate carbohydrate metabolism and the cell cycle; expression is regulated by stress-response elements and by the HOG MAP kinase pathway	239	Glycogen phosphorylase OS=Saccharomyces cerevisiae (strain ATCC 204508 / S288c) GN=GPH1 PE=1 SV=4	PHSG_YEAST	103 kDa	NA	0.009	-0.19	13.628	0.0975314	13.44	13.17	14.27	13.92	13.87	13.65	13.3	13.46	13.77	13.43
YBL004W	UTP20	2	227636	235117	W		Component of the small-subunit (SSU) processome; SSU processome is involved in the biogenesis of the 18S rRNA	494	U3 small nucleolar RNA-associated protein 20 OS=Saccharomyces cerevisiae (strain ATCC 204508 / S288c) GN=UTP20 PE=1 SV=3	UTP20_YEAST	288 kDa	TRUE	0.06	-0.18	12.574	0.315213	12.56	12.45	13.46	12.63	12.58	12.37	12.29	12.37	12.65	12.38
YCR057C	PWP2	3	220457	223228	C	snoRNA-binding rRNA-processing protein PWP2|UTP1|YCR058C|YCR055C	Conserved 90S pre-ribosomal component; essential for proper endonucleolytic cleavage of the 35 S rRNA precursor at A0, A1, and A2 sites; contains eight WD-repeats; PWP2 deletion leads to defects in cell cycle and bud morphogenesis	447	Periodic tryptophan protein 2 OS=Saccharomyces cerevisiae (strain ATCC 204508 / S288c) GN=PWP2 PE=1 SV=2	PWP2_YEAST	104 kDa	NA	0.05	-0.18	13.31	0.291667	13.22	13.27	13.62	13.39	13.5	13.23	13.01	13.05	13.49	13.32
YDL181W	INH1	4	135179	135436	W	ATPase inhibitor	Protein that inhibits ATP hydrolysis by the F1F0-ATP synthase; inhibitory function is enhanced by stabilizing proteins Stf1p and Stf2p; has a calmodulin-binding motif and binds calmodulin in vitro; INH1 has a paralog, STF1, that arose from the whole genome duplication	586	ATPase inhibitor, mitochondrial OS=Saccharomyces cerevisiae (strain ATCC 204508 / S288c) GN=INH1 PE=1 SV=2	ATIF_YEAST	10 kDa	NA	0.091	-0.18	15.304	0.405663	15.41	15.59	15.44	15.35	15.1	15.05	15.64	15.23	15.22	15.01
YDR155C	CPR1	4	768512	769000	C	peptidylprolyl isomerase CPR1|CPH1|CYP1	Cytoplasmic peptidyl-prolyl cis-trans isomerase (cyclophilin); catalyzes the cis-trans isomerization of peptide bonds N-terminal to proline residues; binds the drug cyclosporin A; N-terminally propionylated in vivo; protein abundance increases in response to DNA replication stress	357	Peptidyl-prolyl cis-trans isomerase OS=Saccharomyces cerevisiae (strain ATCC 204508 / S288c) GN=CPR1 PE=1 SV=3	CYPH_YEAST	17 kDa	TRUE	0.031	-0.18	14.338	0.224902	14.5	14.52	14.41	14.37	14.24	14.03	14.86	14.23	14.29	13.93
YEL042W	GDA1	5	73771	75327	W	guanosine diphosphatase	Guanosine diphosphatase located in the Golgi; involved in the transport of GDP-mannose into the Golgi lumen, converting GDP to GMP after mannose is transferred to substrates; null mutants are defective in sporulation and pre-meiotic S phase entry; orthologous to human ENTPD6, a meiosis-associated non-obstructive azoospermia (NOA) related gene identified in GWAS studies	1558	Guanosine-diphosphatase OS=Saccharomyces cerevisiae (strain ATCC 204508 / S288c) GN=GDA1 PE=1 SV=1	GDA1_YEAST	57 kDa	NA	0.48	-0.18	11.214	0.8	11.13	10.3	11.74	11.58	11.5	11.02	11.06	11.12	11.47	11.22
YER155C	BEM2	5	476345	482848	C	TSL1|SUP9|IPL2	Rho GTPase activating protein (RhoGAP); involved in the control of cytoskeleton organization and cellular morphogenesis; required for bud emergence; potential GAP for Rho4p	559	GTPase-activating protein BEM2/IPL2 OS=Saccharomyces cerevisiae (strain ATCC 204508 / S288c) GN=BEM2 PE=1 SV=1	BEM2_YEAST	245 kDa	NA	0.081	-0.18	12.113	0.378682	12.06	11.73	12.63	12.4	12.24	12.02	11.89	12.05	12.2	11.91
YFR006W	YFR006W	6	156145	157752	W	putative Xaa-Pro dipeptidase	Putative X-Pro aminopeptidase; green fluorescent protein (GFP)-fusion protein localizes to the cytoplasm; YFR006W is not an essential gene	140	Uncharacterized peptidase YFR006W OS=Saccharomyces cerevisiae (strain ATCC 204508 / S288c) GN=YFR006W PE=1 SV=1	YFH6_YEAST	62 kDa	NA	0.001	-0.18	12.898	0.0181119	13.01	13.05	12.98	12.93	12.99	12.97	12.58	12.78	12.8	12.89
YFR030W	MET10	6	213312	216419	W	sulfite reductase subunit alpha	Subunit alpha of assimilatory sulfite reductase; complex converts sulfite into sulfide	610	Sulfite reductase [NADPH] flavoprotein component OS=Saccharomyces cerevisiae (strain ATCC 204508 / S288c) GN=MET10 PE=1 SV=2	MET10_YEAST	115 kDa	TRUE	0.099	-0.18	13.764	0.415064	13.46	13.2	14.42	13.95	14.21	13.95	13.21	13.63	13.97	13.64
YGL012W	ERG4	7	472855	474276	W	delta(24(24(1)))-sterol reductase	C-24(28) sterol reductase; catalyzes the final step in ergosterol biosynthesis; mutants are viable, but lack ergosterol	1317	Delta(24(24(1)))-sterol reductase OS=Saccharomyces cerevisiae (strain ATCC 204508 / S288c) GN=ERG4 PE=1 SV=2	ERG4_YEAST	56 kDa	NA	0.37	-0.18	12.576	0.725985	12.58	12.35	13.14	12.58	12.59	12.44	11.96	12.24	12.76	13.12
YGL070C	RPB9	7	374459	374827	C	DNA-directed RNA polymerase II core subunit RPB9|B12.6|SSU73|SHI	RNA polymerase II subunit B12.6; contacts DNA; mutations affect transcription start site selection and fidelity of transcription	905	DNA-directed RNA polymerase II subunit RPB9 OS=Saccharomyces cerevisiae (strain ATCC 204508 / S288c) GN=RPB9 PE=1 SV=1	RPB9_YEAST	14 kDa	NA	0.2	-0.18	13.605	0.571744	13.9	13.95	13.45	13.88	13.31	13.47	13.47	13.63	13.65	13.34
YGL173C	XRN1	7	175527	180113	C	chromatin-binding exonuclease XRN1|KEM1|SKI1|SEP1|RAR5|DST2	Evolutionarily-conserved 5'-3' exonuclease; component of cytoplasmic processing (P) bodies involved in mRNA decay; also enters the nucleus and positively regulates transcription initiation and elongation; plays a role in microtubule-mediated processes, filamentous growth, ribosomal RNA maturation, and telomere maintenance; activated by the scavenger decapping enzyme Dcs1p	42	5'-3' exoribonuclease 1 OS=Saccharomyces cerevisiae (strain ATCC 204508 / S288c) GN=XRN1 PE=1 SV=1	XRN1_YEAST	175 kDa	TRUE	0.0001	-0.18	13.564	0.00438983	13.47	13.27	14.04	13.72	13.78	13.52	13.22	13.43	13.78	13.41
YGR061C	ADE6	7	611889	615965	C	phosphoribosylformylglycinamidine synthase	Formylglycinamidine-ribonucleotide (FGAM)-synthetase; catalyzes a step in the 'de novo' purine nucleotide biosynthetic pathway	45	Phosphoribosylformylglycinamidine synthase OS=Saccharomyces cerevisiae (strain ATCC 204508 / S288c) GN=ADE6 PE=1 SV=2	PUR4_YEAST	149 kDa	NA	0.0001	-0.18	13.837	0.00438983	13.69	13.44	14.43	14	14.12	13.81	13.51	13.65	14.05	13.67
YGR094W	VAS1	7	672186	675500	W	valine--tRNA ligase	Mitochondrial and cytoplasmic valyl-tRNA synthetase; human homolog VARS2 implicated in mitochondrial diseases, can partially complement yeast null mutant	66	Isoform Cytoplasmic of Valine--tRNA ligase, mitochondrial OS=Saccharomyces cerevisiae (strain ATCC 204508 / S288c) GN=VAS1	SYV_YEAST	?	NA	0.00017	-0.18	13.971	0.00687969	13.74	13.53	14.58	14.18	14.29	13.98	13.61	13.8	14.29	13.71
YGR201C	YGR201C	7	902520	903197	C		Putative protein of unknown function	595	Putative elongation factor 1 gamma homolog OS=Saccharomyces cerevisiae (strain ATCC 204508 / S288c) GN=YGR201C PE=4 SV=3	YG4D_YEAST	26 kDa	NA	0.093	-0.18	11.342	0.408254	11.47	11.53	11.54	11.31	11.29	11.05	11.27	11.5	11.17	11.29
YGR218W	CRM1	7	932541	935795	W	exportin CRM1|XPO1|KAP124	Major karyopherin; involved in export of proteins, RNAs, and ribosomal subunits from the nucleus; exportin	370	Exportin-1 OS=Saccharomyces cerevisiae (strain ATCC 204508 / S288c) GN=CRM1 PE=1 SV=1	XPO1_YEAST	124 kDa	NA	0.033	-0.18	13.628	0.229758	13.43	13.14	14.28	13.83	13.9	13.64	13.26	13.38	13.91	13.51
YHR133C	NSG1	8	370722	371597	C		Protein involved in regulation of sterol biosynthesis; specifically stabilizes Hmg2p, one of two HMG-CoA isoenzymes that catalyze the rate-limiting step in sterol biosynthesis; forms foci at the nuclear periphery upon DNA replication stress; relocalizes to the cytosol in response to hypoxia; homolog of mammalian INSIG proteins; NSG1 has a paralog, NSG2, that arose from the whole genome duplication	705	Protein NSG1 OS=Saccharomyces cerevisiae (strain ATCC 204508 / S288c) GN=NSG1 PE=1 SV=1	NSG1_YEAST	32 kDa	NA	0.13	-0.18	13.545	0.470909	13.47	13.28	13.93	13.72	13.72	13.35	13.32	13.36	13.79	13.51
YHR135C	YCK1	8	372694	374310	C	serine/threonine protein kinase YCK1|CKI2	Palmitoylated plasma membrane-bound casein kinase I (CK1) isoform; shares redundant functions with Yck2p in morphogenesis, proper septin assembly, endocytic trafficking, and glucose sensing; stabilized by Sod1p binding in the presence of glucose and oxygen, causing glucose repression of respiratory metabolism; involved in the phosphorylation and regulation of glucose sensor Rgt2p; YCK1 has a para…	1775	Casein kinase I homolog 1 OS=Saccharomyces cerevisiae (strain ATCC 204508 / S288c) GN=YCK1 PE=1 SV=1	KC11_YEAST	62 kDa	TRUE	0.59	-0.18	8.33286	0.86431	NA	NA	9.24	7.95	9.74	7.82	NA	7.83	7.99	7.76
YHR197W	RIX1	8	493896	496187	W	IPI2	Component of the Rix1 complex and possibly pre-replicative complexes; required for processing of ITS2 sequences from 35S pre-rRNA; component of the pre-60S ribosomal particle with the dynein-related AAA-type ATPase Mdn1p; required for pre-replicative complex (pre-RC) formation and maintenance during DNA replication licensing; relocalizes to the cytosol in response to hypoxia; essential gene	530	Pre-rRNA-processing protein RIX1 OS=Saccharomyces cerevisiae (strain ATCC 204508 / S288c) GN=RIX1 PE=1 SV=2	RIX1_YEAST	87 kDa	NA	0.072	-0.18	12.386	0.3552	12.34	12.16	12.97	12.45	12.51	12.08	12.49	12.2	12.5	12.16
YJL050W	MTR4	10	342522	345743	W	ATP-dependent RNA helicase MTR4|DOB1	ATP-dependent 3'-5' RNA helicase of the DExD/H family; involved in nuclear RNA processing and degradation both as a component of TRAMP complex and in TRAMP-independent processes; TRAMP unwinds RNA duplexes, with Mtr4p unwinding activity stimulated by Pap2p/Air2p but not dependent on ongoing polyadenylation; contains an arch domain, with two coiled-coil arms/stalks and a globular fist/KOW domain, …	229	ATP-dependent RNA helicase DOB1 OS=Saccharomyces cerevisiae (strain ATCC 204508 / S288c) GN=MTR4 PE=1 SV=1	MTR4_YEAST	122 kDa	NA	0.008	-0.18	12.833	0.088547	12.8	12.61	13.23	13.02	12.96	12.74	12.62	12.7	12.98	12.67
YLL040C	VPS13	12	54211	63645	C	membrane morphogenesis protein VPS13|VPT2|SOI1	Protein involved in prospore membrane morphogenesis; peripheral membrane protein that localizes to the prospore membrane and at numerous membrane contact sites; involved in sporulation, vacuolar protein sorting, prospore membrane formation during sporulation, and protein-Golgi retention; required for mitochondrial integrity; contains a PH-like domain; homologous to human CHAC and COH1 which are i…	367	Vacuolar protein sorting-associated protein 13 OS=Saccharomyces cerevisiae (strain ATCC 204508 / S288c) GN=VPS13 PE=1 SV=1	VPS13_YEAST	358 kDa	NA	0.033	-0.18	11.857	0.229758	11.76	11.42	12.44	12.02	12.12	11.77	11.61	11.66	11.92	11.85
YMR304W	UBP15	13	874987	878679	W	ubiquitin-specific protease UBP15	Ubiquitin-specific protease involved in protein deubiquitination; forms a complex with AAA peroxins Pex1p and Pex6p; deubiquitinates mono- and polyubiquitinated forms of Pex5p; deubiquitinates Clb5p, counteracting APC activity, and facilitating both Clb5p accumulation and S phase entry; physically interacts with anaphase-promoting complex/cyclosome (APC/C) activator, Cdh1p; catalytic activity reg…	826	Ubiquitin carboxyl-terminal hydrolase 15 OS=Saccharomyces cerevisiae (strain ATCC 204508 / S288c) GN=UBP15 PE=1 SV=1	UBP15_YEAST	144 kDa	NA	0.17	-0.18	11.289	0.530482	11.13	11.04	11.57	11.56	11.5	11.02	11.2	11.12	11.54	11.21
YNL200C	NNR1	14	263713	264453	C	NADHX epimerase	NADHX epimerase; catalyzes isomerization of (R)- and (S)-NADHX; homologous to AIBP in mammals and the N- terminal domain of YjeF in E.coli; enzyme is widespread in eukaryotes, prokaryotes and archaea; the authentic, non-tagged protein is detected in highly purified mitochondria in high-throughput studies	619	NAD(P)H-hydrate epimerase OS=Saccharomyces cerevisiae (strain ATCC 204508 / S288c) GN=YNL200C PE=1 SV=1	NNRE_YEAST	28 kDa	NA	0.1	-0.18	12.336	0.415064	12.34	12.8	12.16	12.51	12.38	12.36	11.97	12.31	12.15	12.38
YNR016C	ACC1	14	654673	661374	C	acetyl-CoA carboxylase ACC1|MTR7|FAS3|ABP2	Acetyl-CoA carboxylase, biotin containing enzyme; catalyzes carboxylation of cytosolic acetyl-CoA to form malonyl-CoA and regulates histone acetylation by regulating the availablity of acetyl-CoA; required for de novo biosynthesis of long-chain fatty acids; ACC1 has a paralog, HFA1, that arose from the whole genome duplication	19	Acetyl-CoA carboxylase OS=Saccharomyces cerevisiae (strain ATCC 204508 / S288c) GN=ACC1 PE=1 SV=2	ACAC_YEAST	250 kDa	TRUE	0.0001	-0.18	13.511	0.00438983	13.23	13.11	14.15	13.71	13.79	13.48	13.14	13.34	13.91	13.25
YOL057W	YOL057W	15	220767	222902	W	dipeptidyl-peptidase III	Dipeptidyl-peptidase III; cleaves dipeptides from the amino terminus of target proteins; highly active on synthetic substrate Arg-Arg-2-naphthylamide; mammalian ortholog may be a biomarker for some cancers	1079	Probable dipeptidyl peptidase 3 OS=Saccharomyces cerevisiae (strain ATCC 204508 / S288c) GN=YOL057W PE=1 SV=1	DPP3_YEAST	81 kDa	NA	0.27	-0.18	13.502	0.64333	13.42	13.02	13.99	13.72	13.83	13.79	12.89	13.24	13.6	13.52
YOL082W	ATG19	15	168727	169974	W	CVT19	Receptor protein for the cytoplasm-to-vacuole targeting (Cvt) pathway; delivers cargo proteins aminopeptidase I (Ape1p) and alpha-mannosidase (Ams1p) to the phagophore assembly site for packaging into Cvt vesicles; interaction with Atg19p during the Cvt pathway requires phosphorylation by Hrr25p	572	Autophagy-related protein 19 OS=Saccharomyces cerevisiae (strain ATCC 204508 / S288c) GN=ATG19 PE=1 SV=1	ATG19_YEAST	48 kDa	NA	0.087	-0.18	11.843	0.397407	12.09	11.86	11.91	12.03	11.78	11.55	11.7	11.62	11.84	12.05
YOL098C	SDD3	15	132725	135838	C		Putative metalloprotease; overproduction suppresses lethality due to expression of the dominant PET9 allele AAC2-A128P	392	Uncharacterized protein YOL098C OS=Saccharomyces cerevisiae (strain ATCC 204508 / S288c) GN=YOL098C PE=1 SV=1	YO098_YEAST	118 kDa	NA	0.036	-0.18	13.893	0.239077	13.71	13.42	14.42	14.09	14.2	13.79	13.85	13.75	14.04	13.66
YOR048C	RAT1	15	418630	421650	C	ssRNA exonuclease RAT1|XRN2|TAP1|HKE1	Nuclear 5' to 3' single-stranded RNA exonuclease; involved in RNA metabolism, including rRNA and snoRNA processing, as well as poly (A+) dependent and independent mRNA transcription termination; required for cotranscriptional pre-rRNA cleavage; displaces Cdk1p from elongating transcripts, especially as RNAPII reaches the poly(A) site, negatively regulates phosphorylation of the CTD of RNAPII, and…	119	5'-3' exoribonuclease 2 OS=Saccharomyces cerevisiae (strain ATCC 204508 / S288c) GN=RAT1 PE=1 SV=3	XRN2_YEAST	116 kDa	TRUE	0.001	-0.18	12.005	0.0181119	11.82	11.73	12.55	12.12	12.3	11.91	11.75	11.84	12.08	11.95
YPL207W	TYW1	16	159909	162341	W	putative tRNA 4-demethylwyosine synthase	Iron-sulfer protein required for synthesis of Wybutosine modified tRNA; Wybutosine is a modified guanosine found at the 3'-position adjacent to the anticodon of phenylalanine tRNA which supports reading frame maintenance by stabilizing codon-anticodon interactions; induction by Yap5p in response to iron provides protection from high iron toxicity; overexpression results in increased cellular iron	437	S-adenosyl-L-methionine-dependent tRNA 4-demethylwyosine synthase OS=Saccharomyces cerevisiae (strain ATCC 204508 / S288c) GN=TYW1 PE=1 SV=1	TYW1_YEAST	90 kDa	TRUE	0.046	-0.18	11.943	0.273885	11.84	11.63	12.53	12.05	12.17	11.9	11.54	11.67	12.15	11.95
YPL231W	FAS2	16	108652	114315	W	trifunctional fatty acid synthase subunit FAS2	Alpha subunit of fatty acid synthetase; complex catalyzes the synthesis of long-chain saturated fatty acids; contains the acyl-carrier protein domain and beta-ketoacyl reductase, beta-ketoacyl synthase and self-pantetheinylation activities	15	Fatty acid synthase subunit alpha OS=Saccharomyces cerevisiae (strain ATCC 204508 / S288c) GN=FAS2 PE=1 SV=2	FAS2_YEAST	207 kDa	TRUE	0.0001	-0.18	13.73	0.00438983	13.55	13.27	14.31	13.97	14.01	13.73	13.3	13.58	14.05	13.53
YPR091C	NVJ2	16	716156	718468	C		Lipid-binding ER protein, enriched at nucleus-vacuolar junctions (NVJ); may be involved in sterol metabolism or signaling at the NVJ; contains a synaptotagmin-like-mitochondrial-lipid binding protein (SMP) domain; binds phosphatidylinositols and other lipids in a large-scale study; may interact with ribosomes, based on co-purification experiments	967	Uncharacterized PH domain-containing protein YPR091C OS=Saccharomyces cerevisiae (strain ATCC 204508 / S288c) GN=YPR091C PE=1 SV=1	YP091_YEAST	87 kDa	TRUE	0.22	-0.18	13.249	0.594161	13.33	13.15	13.64	13.25	13.38	12.89	13.34	12.85	13.41	13.25
YAL017W	PSK1	1	120225	124295	W	serine/threonine protein kinase PSK1|FUN31	PAS domain-containing serine/threonine protein kinase; coordinately regulates protein synthesis and carbohydrate metabolism and storage in response to a unknown metabolite that reflects nutritional status; PSK1 has a paralog, PSK2, that arose from the whole genome duplication	261	Serine/threonine-protein kinase PSK1 OS=Saccharomyces cerevisiae (strain ATCC 204508 / S288c) GN=PSK1 PE=1 SV=2	PSK1_YEAST	152 kDa	TRUE	0.013	-0.17	13.681	0.130504	13.78	13.73	13.78	13.78	13.77	13.42	13.81	13.53	13.66	13.55
YCR077C	PAT1	3	250238	252628	C	MRT1	Deadenylation-dependent mRNA-decapping factor; also required for faithful chromosome transmission, maintenance of rDNA locus stability, and protection of mRNA 3'-UTRs from trimming; associated with topoisomerase II; binds to mRNAs under glucose starvation, most often in the 3' UTR; functionally linked to Pab1p; forms cytoplasmic foci upon DNA replication stress; phosphorylation by PKA inhibits P …	174	DNA topoisomerase 2-associated protein PAT1 OS=Saccharomyces cerevisiae (strain ATCC 204508 / S288c) GN=PAT1 PE=1 SV=4	PAT1_YEAST	89 kDa	NA	0.004	-0.17	13.586	0.0578771	13.58	13.37	13.96	13.69	13.71	13.47	13.42	13.49	13.74	13.43
YDL022W	GPD1	4	411825	413000	W	glycerol-3-phosphate dehydrogenase (NAD(+)) GPD1|OSR5|OSG1|HOR1|DAR1	NAD-dependent glycerol-3-phosphate dehydrogenase; key enzyme of glycerol synthesis, essential for growth under osmotic stress; expression regulated by high-osmolarity glycerol response pathway; protein abundance increases in response to DNA replication stress; constitutively inactivated via phosphorylation by the protein kinases Ypk1p and Ypk2p, dephosphorylation increases catalytic activity; for…	40	Glycerol-3-phosphate dehydrogenase [NAD(+)] 1 OS=Saccharomyces cerevisiae (strain ATCC 204508 / S288c) GN=GPD1 PE=1 SV=4	GPD1_YEAST	43 kDa	TRUE	0.0001	-0.17	14.458	0.00438983	14.57	14.7	14.51	14.46	14.48	14.35	14.3	14.4	14.39	14.42
YDL171C	GLT1	4	149203	155640	C	glutamate synthase (NADH)	NAD(+)-dependent glutamate synthase (GOGAT); synthesizes glutamate from glutamine and alpha-ketoglutarate; with Gln1p, forms the secondary pathway for glutamate biosynthesis from ammonia; expression regulated by nitrogen source; assembles into filaments as cells approach stationary phase and under cytosolic acidification and starvation conditions	187	Glutamate synthase [NADH] OS=Saccharomyces cerevisiae (strain ATCC 204508 / S288c) GN=GLT1 PE=1 SV=2	GLT1_YEAST	238 kDa	NA	0.005	-0.17	13.547	0.065736	13.37	13.08	14.14	13.75	13.83	13.57	13.12	13.4	13.83	13.38
YDL209C	CWC2	4	86207	87226	C	NTC40	Member of the NineTeen Complex (NTC); this complex contains Prp19p and stabilizes U6 snRNA in catalytic forms of the spliceosome containing U2, U5, and U6 snRNAs; binds directly to U6 snRNA; similar to S. pombe Cwf2	376	Pre-mRNA-splicing factor CWC2 OS=Saccharomyces cerevisiae (strain ATCC 204508 / S288c) GN=CWC2 PE=1 SV=1	CWC2_YEAST	38 kDa	TRUE	0.033	-0.17	14.087	0.229758	14.13	14.3	14	14.31	14.1	13.83	14.22	14.05	13.96	13.97
YDR055W	PST1	4	563527	564861	W	HPF2	Cell wall protein that contains a putative GPI-attachment site; secreted by regenerating protoplasts; up-regulated by activation of the cell integrity pathway, as mediated by Rlm1p; upregulated by cell wall damage via disruption of FKS1; PST1 has a paralog, ECM33, that arose from the whole genome duplication	439	Cell wall mannoprotein PST1 OS=Saccharomyces cerevisiae (strain ATCC 204508 / S288c) GN=PST1 PE=1 SV=1	PST1_YEAST	46 kDa	NA	0.046	-0.17	14.344	0.273885	14.41	14.54	14.55	14.41	14.2	14.28	14.33	14.32	14.29	14.11
YDR097C	MSH6	4	640109	643837	C	PMS6|mismatch repair ATPase MSH6|PMS3	Protein required for mismatch repair in mitosis and meiosis; forms a complex with Msh2p to repair both single-base & insertion-deletion mispairs; also involved in interstrand cross-link repair; potentially phosphorylated by Cdc28p	877	DNA mismatch repair protein MSH6 OS=Saccharomyces cerevisiae (strain ATCC 204508 / S288c) GN=MSH6 PE=1 SV=1	MSH6_YEAST	140 kDa	NA	0.19	-0.17	11.617	0.560478	11.83	11.35	11.88	11.77	11.67	11.68	11.26	11.33	11.82	11.58
YDR162C	NBP2	4	780390	781100	C		Protein involved in the HOG (high osmolarity glycerol) pathway; negatively regulates Hog1p by recruitment of phosphatase Ptc1p the Pbs2p-Hog1p complex; interacts with Bck1p and down regulates the cell wall integrity pathway; found in the nucleus and cytoplasm, contains an SH3 domain and a Ptc1p binding domain (PBM)	301	NAP1-binding protein 2 OS=Saccharomyces cerevisiae (strain ATCC 204508 / S288c) GN=NBP2 PE=1 SV=1	NBP2_YEAST	27 kDa	NA	0.019	-0.17	11.672	0.165134	11.91	11.81	11.7	11.7	11.68	11.33	11.76	11.62	11.42	11.79
YDR294C	DPL1	4	1050459	1052228	C	sphinganine-1-phosphate aldolase DPL1|BST1	Dihydrosphingosine phosphate lyase; regulates intracellular levels of sphingolipid long-chain base phosphates (LCBPs), degrades phosphorylated long chain bases, prefers C16 dihydrosphingosine-l-phosphate as a substrate	928	Sphingosine-1-phosphate lyase OS=Saccharomyces cerevisiae (strain ATCC 204508 / S288c) GN=DPL1 PE=1 SV=1	SGPL_YEAST	66 kDa	NA	0.21	-0.17	13.246	0.586731	13.21	12.77	13.76	13.42	13.43	13.16	12.87	13.16	13.54	13.14
YGL242C	YGL242C	7	44652	45197	C		Protein of unknown function; N-terminally propionylated in vivo; deletion mutant is viable	516	Ankyrin repeat-containing protein YGL242C OS=Saccharomyces cerevisiae (strain ATCC 204508 / S288c) GN=YGL242C PE=1 SV=1	YGZ2_YEAST	20 kDa	NA	0.067	-0.17	13.891	0.338926	13.97	13.83	13.92	14.09	13.93	13.63	14.12	13.79	13.84	13.79
YGR097W	ASK10	7	678695	682135	W	RGC2	Regulator of the Fps1p glycerol channel; under nonstress conditions, binds to Fps1p to positively regulate glycerol transport; under osmotic stress, multiple phosphorylation by Hog1p causes Ask10p to dissociate from Fps1p; forms homodimers and heterodimerizes with paralog Rgc1p; phosphorylated in response to oxidative stress; has a role in destruction of Ssn8p; associates with RNA polymerase II h…	460	Activator of SKN7 protein 10 OS=Saccharomyces cerevisiae (strain ATCC 204508 / S288c) GN=ASK10 PE=1 SV=2	ASK10_YEAST	127 kDa	TRUE	0.053	-0.17	12.701	0.299063	12.68	12.4	13.3	12.78	12.86	12.69	12.4	12.64	12.67	12.59
YGR240C	PFK1	7	970771	973734	C	6-phosphofructokinase subunit alpha	Alpha subunit of heterooctameric phosphofructokinase; involved in glycolysis, indispensable for anaerobic growth, activated by fructose-2,6-bisphosphate and AMP, mutation inhibits glucose induction of cell cycle-related genes	54	ATP-dependent 6-phosphofructokinase subunit alpha OS=Saccharomyces cerevisiae (strain ATCC 204508 / S288c) GN=PFK1 PE=1 SV=1	PFKA1_YEAST	108 kDa	TRUE	0.0001	-0.17	14.066	0.00438983	13.85	13.57	14.67	14.27	14.37	14.08	13.73	13.91	14.3	13.91
YHR023W	MYO1	8	151666	157452	W	myosin 1	Type II myosin heavy chain; required for wild-type cytokinesis and cell separation; localizes to the actomyosin ring; binds to myosin light chains Mlc1p and Mlc2p through its IQ1 and IQ2 motifs respectively	543	Myosin-1 OS=Saccharomyces cerevisiae (strain ATCC 204508 / S288c) GN=MYO1 PE=1 SV=3	MYO1_YEAST	224 kDa	TRUE	0.076	-0.17	12.393	0.361838	12.31	12.2	12.75	12.65	12.45	12.44	12.23	12.37	12.33	12.2
YJR048W	CYC1	10	526335	526664	W	cytochrome c isoform 1	Cytochrome c, isoform 1; also known as iso-1-cytochrome c; electron carrier of mitochondrial intermembrane space that transfers electrons from ubiquinone-cytochrome c oxidoreductase to cytochrome c oxidase during cellular respiration; CYC1 has a paralog, CYC7, that arose from the whole genome duplication; human homolog CYC1 can complement yeast null mutant; mutations in human CYC1 cause insulin-r…	2129	Cluster of Cytochrome c iso-1 OS=Saccharomyces cerevisiae (strain ATCC 204508 / S288c) GN=CYC1 PE=1 SV=2 (CYC1_YEAST)	CYC1_YEAST [2]	12 kDa	TRUE	0.75	-0.17	15.467	0.919309	15.6	15.8	15.59	15.46	15.36	15.2	15.55	15.35	15.5	15.26
YKL014C	URB1	11	411619	416913	C	NPA1	Protein required for the normal accumulation of 25S and 5.8S rRNAs; nucleolar protein; associated with the 27SA2 pre-ribosomal particle; proposed to be involved in the biogenesis of the 60S ribosomal subunit	122	Nucleolar pre-ribosomal-associated protein 1 OS=Saccharomyces cerevisiae (strain ATCC 204508 / S288c) GN=URB1 PE=1 SV=2	URB1_YEAST	203 kDa	NA	0.001	-0.17	12.681	0.0181119	12.72	12.54	13.1	12.83	12.71	12.51	12.59	12.53	12.71	12.57
YKL078W	DHR2	11	288845	291052	W	RNA helicase	Predominantly nucleolar DEAH-box ATP-dependent RNA helicase; required for 18S rRNA synthesis	532	Probable ATP-dependent RNA helicase DHR2 OS=Saccharomyces cerevisiae (strain ATCC 204508 / S288c) GN=DHR2 PE=1 SV=1	DHR2_YEAST	83 kDa	NA	0.073	-0.17	12.803	0.356736	12.69	12.56	13.14	13	13.08	12.57	12.73	12.67	12.85	12.74
YKL157W	APE2	11	154991	158232	W	metallo-aminopeptidase|YKL158W|LAP1	Aminopeptidase yscII; may have a role in obtaining leucine from dipeptide substrates; APE2 has a paralog, AAP1, that arose from the whole genome duplication	264	Aminopeptidase 2, mitochondrial OS=Saccharomyces cerevisiae (strain ATCC 204508 / S288c) GN=APE2 PE=1 SV=4	APE2_YEAST	108 kDa	TRUE	0.014	-0.17	13.389	0.13683	13.23	13	13.85	13.62	13.67	13.48	13.08	13.22	13.6	13.14
YLR019W	PSR2	12	180288	181481	W	putative phosphatase	Plasma membrane phosphatase involved in the general stress response; required with Psr1p and Whi2p for full activation of STRE-mediated gene expression, possibly through dephosphorylation of Msn2p; PSR2 has a paralog, PSR1, that arose from the whole genome duplication	446	Probable phosphatase PSR2 OS=Saccharomyces cerevisiae (strain ATCC 204508 / S288c) GN=PSR2 PE=1 SV=1	PSR2_YEAST	45 kDa	TRUE	0.049	-0.17	12.756	0.287127	12.85	12.97	12.74	12.96	12.67	12.54	12.83	12.75	12.52	12.73
YLR106C	MDN1	12	349006	363738	C	AAA family ATPase midasin|REA1	Huge dynein-related AAA-type ATPase (midasin); forms extended pre-60S particle with the Rix1 complex (Rix1p-Ipi1p-Ipi3p); acts in removal of ribosomal biogenesis factors at successive steps of pre-60S assembly and export from nucleus	98	Midasin OS=Saccharomyces cerevisiae (strain ATCC 204508 / S288c) GN=MDN1 PE=1 SV=1	MDN1_YEAST	559 kDa	NA	0.00072	-0.17	13.171	0.0181119	13.12	12.82	13.73	13.36	13.31	13.09	13.06	12.89	13.27	13.06
YML072C	TCB3	13	124730	129367	C		Cortical ER protein involved in ER-plasma membrane tethering; one of 6 proteins (Ist2p, Scs2p, Scs22p, Tcb1p, Tcb2p, Tcb3p) that connect ER to the plasma membrane (PM) and regulate PM phosphatidylinositol-4-phosphate (PI4P) levels by controlling access of Sac1p phosphatase to its substrate PI4P in the PM; localized to the bud via specific mRNA transport; non-tagged protein detected in a phosphory…	83	Tricalbin-3 OS=Saccharomyces cerevisiae (strain ATCC 204508 / S288c) GN=TCB3 PE=1 SV=1	TCB3_YEAST	171 kDa	TRUE	0.00043	-0.17	12.659	0.0137494	12.58	12.39	13.1	12.86	12.82	12.61	12.43	12.45	12.8	12.55
YMR021C	MAC1	13	317165	318418	C	CUA1	Copper-sensing transcription factor; involved in regulation of genes required for high affinity copper transport; required for regulation of yeast copper genes in response to DNA-damaging agents; undergoes changes in redox state in response to changing levels of copper or MMS	981	Metal-binding activator 1 OS=Saccharomyces cerevisiae (strain ATCC 204508 / S288c) GN=MAC1 PE=1 SV=2	MAC1_YEAST	47 kDa	NA	0.23	-0.17	13.228	0.607238	13.03	13.19	13.61	13.26	13.45	13.45	13.11	13.05	13.05	13.08
YMR054W	STV1	13	383303	385975	W	H(+)-transporting V0 sector ATPase subunit a	Subunit a of the vacuolar-ATPase V0 domain; one of two isoforms (Stv1p and Vph1p); Stv1p is located in V-ATPase complexes of the Golgi and endosomes while Vph1p is located in V-ATPase complexes of the vacuole	759	V-type proton ATPase subunit a, Golgi isoform OS=Saccharomyces cerevisiae (strain ATCC 204508 / S288c) GN=STV1 PE=1 SV=2	STV1_YEAST	102 kDa	NA	0.15	-0.17	12.397	0.507843	12.29	11.98	12.78	12.68	12.65	12.28	12.28	11.98	12.5	12.55
YMR089C	YTA12	13	445609	448086	C	m-AAA protease subunit YTA12|RCA1	Mitochondrial inner membrane m-AAA protease component; mediates degradation of misfolded or unassembled proteins; also required for correct assembly of mitochondrial enzyme complexes; overexpression of human AFG3L2 complements respiratory defect of yeast afg3 yta12 double null mutation, but overexpression of disease-associated AFG3L2 variants does not; expression of both human SPG7 (paraplegin) a…	408	Mitochondrial respiratory chain complexes assembly protein YTA12 OS=Saccharomyces cerevisiae (strain ATCC 204508 / S288c) GN=YTA12 PE=1 SV=2	YTA12_YEAST	93 kDa	TRUE	0.039	-0.17	12.294	0.250025	12.17	12.06	12.96	12.3	12.55	12.29	12.12	11.93	12.48	12.08
YMR170C	ALD2	13	601562	603082	C	aldehyde dehydrogenase (NAD(+)) ALD2	Cytoplasmic aldehyde dehydrogenase; involved in ethanol oxidation and beta-alanine biosynthesis; uses NAD+ as the preferred coenzyme; expression is stress induced and glucose repressed; very similar to Ald3p	470	Cluster of Aldehyde dehydrogenase [NAD(P)+] 1 OS=Saccharomyces cerevisiae (strain ATCC 204508 / S288c) GN=ALD2 PE=1 SV=2 (ALDH2_YEAST)	ALDH2_YEAST [2]	55 kDa	TRUE	0.055	-0.17	13.275	0.30438	13.39	13.31	13.45	13.27	13.36	13.24	13.08	13.12	13.18	13.35
YMR173W	DDR48	13	608689	609981	W	DNA damage-responsive protein 48|FSP	DNA damage-responsive protein; expression is increased in response to heat-shock stress or treatments that produce DNA lesions; contains multiple repeats of the amino acid sequence NNNDSYGS; protein abundance increases in response to DNA replication stress	170	Stress protein DDR48 OS=Saccharomyces cerevisiae (strain ATCC 204508 / S288c) GN=DDR48 PE=1 SV=4	DDR48_YEAST	46 kDa	NA	0.004	-0.17	10.727	0.0578771	10.9	10.98	10.74	10.81	10.64	10.48	11.01	10.54	10.64	10.53
YMR229C	RRP5	13	725934	731123	C		RNA binding protein involved in synthesis of 18S and 5.8S rRNAs; component of ribosomal small subunit (SSU) processome and 90S preribosome; required for pre-rRNA packaging and compaction of processome into dense terminal balls; part of Mak21p-Noc2p-Rrp5p module that associates with nascent pre-rRNA during transcription with role in biogenesis of large ribosomal subunit; binds single stranded trac…	31	rRNA biogenesis protein RRP5 OS=Saccharomyces cerevisiae (strain ATCC 204508 / S288c) GN=RRP5 PE=1 SV=1	RRP5_YEAST	193 kDa	NA	0.0001	-0.17	14.133	0.00438983	14.02	13.8	14.61	14.35	14.34	14.1	13.82	14.02	14.3	13.97
YMR246W	FAA4	13	759807	761891	W	long-chain fatty acid-CoA ligase FAA4	Long chain fatty acyl-CoA synthetase; activates fatty acids with a preference for C12:0-C16:0 chain lengths; role in the competitive import of long-chain fatty acids and sphingoid long-chain bases; role in stationary phase survival; localizes to lipid particles and the plasma membrane; role in sphingolipid-to-glycerolipid metabolism; forms cytoplasmic foci upon replication stress; faa1 faa4 doubl…	344	Long-chain-fatty-acid--CoA ligase 4 OS=Saccharomyces cerevisiae (strain ATCC 204508 / S288c) GN=FAA4 PE=1 SV=1	LCF4_YEAST	77 kDa	TRUE	0.027	-0.17	12.725	0.205073	12.49	12.58	13.24	12.92	12.88	12.8	12.28	12.54	12.94	12.58
YMR250W	GAD1	13	770801	772558	W	glutamate decarboxylase GAD1	Glutamate decarboxylase; converts glutamate into gamma-aminobutyric acid (GABA) during glutamate catabolism; involved in response to oxidative stress	735	Glutamate decarboxylase OS=Saccharomyces cerevisiae (strain ATCC 204508 / S288c) GN=GAD1 PE=1 SV=1	DCE_YEAST	66 kDa	NA	0.14	-0.17	13.06	0.488679	12.75	12.82	13.51	13.39	13.32	13.22	12.59	12.82	13.28	12.9
YMR266W	RSN1	13	798518	801379	W		Membrane protein of unknown function; overexpression suppresses NaCl sensitivity of sro7 mutant cells by restoring sodium pump (Ena1p) localization to the plasma membrane	450	Uncharacterized protein RSN1 OS=Saccharomyces cerevisiae (strain ATCC 204508 / S288c) GN=RSN1 PE=1 SV=1	RSN1_YEAST	108 kDa	NA	0.051	-0.17	11.94	0.292882	11.76	11.83	12.45	12.04	12.13	11.79	11.65	11.79	12.17	11.79
YNL115C	YNL115C	14	410119	412053	C		Putative protein of unknown function; green fluorescent protein (GFP)-fusion protein localizes to mitochondria; YNL115C is not an essential gene	354	Uncharacterized vacuolar membrane protein YNL115C OS=Saccharomyces cerevisiae (strain ATCC 204508 / S288c) GN=YNL115C PE=1 SV=1	YNL5_YEAST	74 kDa	NA	0.03	-0.17	12.839	0.220739	12.89	12.9	13.05	12.82	12.98	12.77	12.68	12.77	12.88	12.65
YNL310C	ZIM17	14	51907	52431	C	HEP1|TIM15|FMP28	Protein co-chaperone with a zinc finger motif; essential for protein import into mitochondria; may act with Pam18p to facilitate recognition and folding of imported proteins by Ssc1p (mtHSP70) in the mitochondrial matrix; required for the maintenance of Ssc1p solubility and assists in the functional interaction of Ssc1p with substrate proteins	929	Mitochondrial protein import protein ZIM17 OS=Saccharomyces cerevisiae (strain ATCC 204508 / S288c) GN=ZIM17 PE=1 SV=2	ZIM17_YEAST	20 kDa	NA	0.21	-0.17	11.049	0.586731	11.65	11.13	11.22	11.06	11.11	10.59	10.04	11.21	11.31	11.17
YPL151C	PRP46	16	266180	267535	C	mRNA splicing protein PRP46|NTC50	Member of the NineTeen Complex (NTC); this complex contains Prp19p and stabilizes U6 snRNA in catalytic forms of the spliceosome containing U2, U5, and U6 snRNAs	249	Pre-mRNA-splicing factor PRP46 OS=Saccharomyces cerevisiae (strain ATCC 204508 / S288c) GN=PRP46 PE=1 SV=1	PRP46_YEAST	51 kDa	NA	0.01	-0.17	12.803	0.104858	13	13.24	12.78	12.74	12.72	12.79	12.64	12.73	12.61	12.78
YCR018C	SRD1	3	148238	148903	C		Protein involved in the processing of pre-rRNA to mature rRNA; contains a C2/C2 zinc finger motif; srd1 mutation suppresses defects caused by the rrp1-1 mutation	777	Pre-rRNA-processing protein SRD1 OS=Saccharomyces cerevisiae (strain ATCC 204508 / S288c) GN=SRD1 PE=1 SV=2	SRD1_YEAST	26 kDa	NA	0.16	-0.16	12.495	0.51995	12.76	12.8	12.28	12.61	12.41	12.22	12.76	12.25	12.42	12.44
YDR001C	NTH1	4	450220	452475	C	alpha,alpha-trehalase NTH1	Neutral trehalase, degrades trehalose; required for thermotolerance and may mediate resistance to other cellular stresses; phosphorylated and activated by Cdc28p at the G1/S phase transition to coordinately regulate carbohydrate metabolism and the cell cycle; inhibited by Dcs1p; NTH1 has a paralog, NTH2, that arose from the whole genome duplication	1645	Neutral trehalase OS=Saccharomyces cerevisiae (strain ATCC 204508 / S288c) GN=NTH1 PE=1 SV=3	TREA_YEAST	86 kDa	NA	0.53	-0.16	11.511	0.837523	11.31	11.05	12.12	11.92	11.65	11.43	11.31	11.39	11.7	11.23
YDR122W	KIN1	4	694700	697894	W	serine/threonine protein kinase KIN1	Serine/threonine protein kinase involved in regulation of exocytosis; localizes to the cytoplasmic face of the plasma membrane; KIN1 has a paralog, KIN2, that arose from the whole genome duplication	665	Serine/threonine protein kinase KIN1 OS=Saccharomyces cerevisiae (strain ATCC 204508 / S288c) GN=KIN1 PE=1 SV=3	KIN1_YEAST	120 kDa	TRUE	0.12	-0.16	12.378	0.456388	12.43	12.03	12.77	12.5	12.54	12.27	12.31	12.31	12.4	12.22
YER013W	PRP22	5	178841	182278	W	DEAH-box ATP-dependent RNA helicase PRP22	DEAH-box RNA-dependent ATPase/ATP-dependent RNA helicase; associates with lariat intermediates before the second catalytic step of splicing; mediates ATP-dependent mRNA release from the spliceosome and unwinds RNA duplexes; required for proofreading the exon ligation reaction	855	Pre-mRNA-splicing factor ATP-dependent RNA helicase PRP22 OS=Saccharomyces cerevisiae (strain ATCC 204508 / S288c) GN=PRP22 PE=1 SV=1	PRP22_YEAST	130 kDa	NA	0.18	-0.16	12.71	0.549764	12.86	12.61	12.86	12.76	12.68	12.55	13.05	12.58	12.7	12.45
YER031C	YPT31	5	214076	214747	C	Rab family GTPase YPT31|YPT8	Rab family GTPase; involved in the exocytic pathway; mediates intra-Golgi traffic or the budding of post-Golgi vesicles from the trans-Golgi; YPT31 has a paralog, YPT32, that arose from the whole genome duplication; localizes to the transitional and late Golgi	192	Cluster of GTP-binding protein YPT31/YPT8 OS=Saccharomyces cerevisiae (strain ATCC 204508 / S288c) GN=YPT31 PE=1 SV=3 (YPT31_YEAST)	YPT31_YEAST [2]	24 kDa	TRUE	0.005	-0.16	14.582	0.065736	14.53	14.55	14.93	14.67	14.68	14.68	14.35	14.32	14.66	14.45
YGL013C	PDR1	7	469092	472298	C	drug-responsive transcription factor PDR1|TPE3|TPE1|TIL1|SMR2|NRA2|CYH3|BOR2|ANT1|AMY1	Transcription factor that regulates the pleiotropic drug response; zinc cluster protein that is a master regulator involved in recruiting other zinc cluster proteins to pleiotropic drug response elements (PDREs) to fine tune the regulation of multidrug resistance genes; relocalizes to the cytosol in response to hypoxia; PDR1 has a paralog, PDR3, that arose from the whole genome duplication	1042	Transcription factor PDR1 OS=Saccharomyces cerevisiae (strain ATCC 204508 / S288c) GN=PDR1 PE=1 SV=2	PDR1_YEAST	122 kDa	NA	0.26	-0.16	11.198	0.635283	11.04	10.76	11.59	11.49	11.54	10.82	11.23	11.07	11.29	11.15
YGL137W	SEC27	7	249869	252738	W	coatomer subunit beta'	Essential beta'-coat protein of the COPI coatomer; involved in ER-to-Golgi and Golgi-to-ER transport; contains WD40 domains that mediate cargo selective interactions; 45% sequence identity to mammalian beta'-COP	246	Coatomer subunit beta' OS=Saccharomyces cerevisiae (strain ATCC 204508 / S288c) GN=SEC27 PE=1 SV=1	COPB2_YEAST	99 kDa	NA	0.01	-0.16	14.449	0.104858	14.25	14.1	14.93	14.64	14.75	14.57	13.95	14.32	14.72	14.26
YGL207W	SPT16	7	98969	102076	W	chromatin-remodeling protein SPT16|SSF1|CDC68	Subunit of the heterodimeric FACT complex (Spt16p-Pob3p); FACT associates with chromatin via interaction with Nhp6Ap and Nhp6Bp, and reorganizes nucleosomes to facilitate access to DNA by RNA and DNA polymerases; specifically required for diauxic shift-induced H2B deposition onto rDNA genes; mutations cause reduced nucleosome occupancy over highly transcribed regions; coregulates transcription wi…	377	FACT complex subunit SPT16 OS=Saccharomyces cerevisiae (strain ATCC 204508 / S288c) GN=SPT16 PE=1 SV=1	SPT16_YEAST	119 kDa	NA	0.034	-0.16	13.272	0.230524	13.13	12.74	13.89	13.5	13.53	13.34	12.81	13.15	13.48	13.15
YGR248W	SOL4	7	985972	986739	W	6-phosphogluconolactonase SOL4	6-phosphogluconolactonase; protein abundance increases in response to DNA replication stress; SOL4 has a paralog, SOL3, that arose from the whole genome duplication	289	6-phosphogluconolactonase 4 OS=Saccharomyces cerevisiae (strain ATCC 204508 / S288c) GN=SOL4 PE=1 SV=1	SOL4_YEAST	28 kDa	NA	0.017	-0.16	13.32	0.153951	13.39	13.55	13.41	13.4	13.28	13.18	13.21	13.19	13.32	13.27
YHL030W	ECM29	8	40084	45690	W		Scaffold protein; assists in association of the proteasome core particle with the regulatory particle; inhibits proteasomal ATPase activity; degraded by the mature proteasome after assembly; contains HEAT-like repeats; protein increases in abundance and relocalizes from nucleus to cytoplasm upon DNA replication stress	742	Proteasome component ECM29 OS=Saccharomyces cerevisiae (strain ATCC 204508 / S288c) GN=ECM29 PE=1 SV=1	ECM29_YEAST	210 kDa	NA	0.14	-0.16	13.21	0.488679	13.31	12.83	13.74	13.38	13.29	13.13	12.91	12.92	13.28	13.31
YJL098W	SAP185	10	242082	245258	W		Protein that forms a complex with the Sit4p protein phosphatase; required for Sit4p function; member of a family of similar proteins including Sap4p, Sap155p, and Sap190p; SAP185 has a paralog, SAP190, that arose from the whole genome duplication	648	SIT4-associating protein SAP185 OS=Saccharomyces cerevisiae (strain ATCC 204508 / S288c) GN=SAP185 PE=1 SV=1	SA185_YEAST	121 kDa	TRUE	0.11	-0.16	11.955	0.438983	11.91	11.78	12.3	12.13	12.02	11.85	11.7	11.89	11.96	12.01
YLR093C	NYV1	12	326513	327415	C	MAM2	v-SNARE component of the vacuolar SNARE complex; involved in vesicle fusion; inhibits ATP-dependent Ca(2+) transport activity of Pmc1p in the vacuolar membrane	1012	Vacuolar v-SNARE NYV1 OS=Saccharomyces cerevisiae (strain ATCC 204508 / S288c) GN=NYV1 PE=1 SV=2	NYV1_YEAST	29 kDa	NA	0.24	-0.16	12.089	0.618507	11.99	11.99	12.47	12.1	12.27	11.85	12.09	11.95	12.21	11.97
YLR378C	SEC61	12	875736	877178	C	translocon subunit SEC61	Conserved ER protein translocation channel; essential subunit of Sec61 complex (Sec61p, Sbh1p, and Sss1p); forms channel for SRP-dependent protein import; with Sec63 complex allows SRP-independent protein import into ER; involved in posttranslational soluble protein import into the ER, ERAD of soluble substrates, and misfolded soluble protein export from the ER	1003	Protein transport protein SEC61 OS=Saccharomyces cerevisiae (strain ATCC 204508 / S288c) GN=SEC61 PE=1 SV=1	SC61A_YEAST	53 kDa	NA	0.24	-0.16	13.03	0.618507	12.95	12.86	13.51	13.16	13.26	12.96	12.92	12.61	13.11	12.96
YLR389C	STE23	12	899577	902660	C	metalloendopeptidase	Metalloprotease; involved in N-terminal processing of pro-a-factor to mature form; expressed in both haploids and diploids; one of two yeast homologs of human insulin-degrading enzyme (hIDE); homolog Axl1p is also involved in processing of pro-a-factor	800	A-factor-processing enzyme OS=Saccharomyces cerevisiae (strain ATCC 204508 / S288c) GN=STE23 PE=1 SV=2	STE23_YEAST	118 kDa	NA	0.16	-0.16	12.523	0.51995	12.55	12.25	12.9	12.72	12.54	12.45	12.77	12.32	12.53	12.2
YLR419W	YLR419W	12	958428	962735	W	putative helicase	Putative helicase with limited sequence similarity to human Rb protein; the authentic, non-tagged protein is detected in highly purified mitochondria in high-throughput studies; YLR419W is not an essential gene	523	Putative ATP-dependent RNA helicase YLR419W OS=Saccharomyces cerevisiae (strain ATCC 204508 / S288c) GN=YLR419W PE=1 SV=1	YL419_YEAST	163 kDa	NA	0.069	-0.16	11.94	0.344335	11.98	11.78	12.27	12.05	12.07	11.82	11.78	11.59	12.05	12.01
YMR215W	GAS3	13	696796	698370	W	putative 1,3-beta-glucanosyltransferase	Putative 1,3-beta-glucanosyltransferase; has similarity go other GAS family members; low abundance, possibly inactive member of the GAS family of GPI-containing proteins; localizes to the cell wall; mRNA induced during sporulation	454	Probable 1,3-beta-glucanosyltransferase GAS3 OS=Saccharomyces cerevisiae (strain ATCC 204508 / S288c) GN=GAS3 PE=1 SV=1	GAS3_YEAST	57 kDa	NA	0.051	-0.16	12.661	0.292882	12.75	12.48	13.13	12.72	12.68	12.38	12.71	12.52	12.67	12.57
YOR054C	VHS3	15	427833	429857	C	phosphopantothenoylcysteine decarboxylase complex subunit VHS3|YOR29-05	Negative regulatory subunit of protein phosphatase 1 Ppz1p; involved in coenzyme A biosynthesis; subunit of the phosphopantothenoylcysteine decarboxylase (PPCDC; Cab3p, Sis2p, Vhs3p) complex and the CoA-Synthesizing Protein Complex (CoA-SPC: Cab2p, Cab3p, Cab4p, Cab5p, Sis2p and Vhs3p)	920	Phosphopantothenoylcysteine decarboxylase subunit VHS3 OS=Saccharomyces cerevisiae (strain ATCC 204508 / S288c) GN=VHS3 PE=1 SV=1	VHS3_YEAST	74 kDa	TRUE	0.21	-0.16	11.898	0.586731	11.88	11.98	12.14	11.84	12.11	11.95	11.89	11.88	11.65	11.66
YOR101W	RAS1	15	515244	516173	W	Ras family GTPase RAS1	GTPase involved in G-protein signaling in adenylate cyclase activation; plays a role in cell proliferation; localized to the plasma membrane; homolog of mammalian RAS proto-oncogenes; relative distribution to the nucleus increases upon DNA replication stress; RAS1 has a paralog, RAS2, that arose from the whole genome duplication	101	Ras-like protein 1 OS=Saccharomyces cerevisiae (strain ATCC 204508 / S288c) GN=RAS1 PE=1 SV=2	RAS1_YEAST	34 kDa	NA	0.0008	-0.16	12.72	0.0181119	12.74	12.84	12.84	12.91	12.68	12.53	12.77	12.6	12.69	12.6
YOR341W	RPA190	15	960987	965981	W	DNA-directed RNA polymerase I core subunit RPA190|A190|RRN1	RNA polymerase I largest subunit A190	107	DNA-directed RNA polymerase I subunit RPA190 OS=Saccharomyces cerevisiae (strain ATCC 204508 / S288c) GN=RPA190 PE=1 SV=2	RPA1_YEAST	186 kDa	TRUE	0.001	-0.16	14.208	0.0181119	14.03	13.83	14.76	14.4	14.46	14.09	13.99	14.05	14.4	14.07
YPR042C	PUF2	16	650435	653662	C		PUF family mRNA-binding protein; Pumilio homology domain confers RNA binding activity; preferentially binds mRNAs encoding membrane-associated proteins; binding site composed of two UAAU tetranucleotides, separated by a 3-nt linker; PUF2 has a paralog, JSN1, that arose from the whole genome duplication	660	mRNA-binding protein PUF2 OS=Saccharomyces cerevisiae (strain ATCC 204508 / S288c) GN=PUF2 PE=1 SV=1	PUF2_YEAST	120 kDa	NA	0.12	-0.16	13.255	0.456388	13.13	13.02	13.78	13.43	13.35	13.1	13.16	13.14	13.4	13.04
YAL041W	CDC24	1	62840	65404	W	Rho family guanine nucleotide exchange factor CDC24|CLS4	Guanine nucleotide exchange factor (GEF) for Cdc42p; required for polarity establishment and maintenance, and mutants have morphological defects in bud formation and shmooing; relocalizes from nucleus to cytoplasm upon DNA replication stress; thermosensitivity of the cdc24-4 mutant in the presence of sorbitol is functionally complemented by human CDC42	563	Cell division control protein 24 OS=Saccharomyces cerevisiae (strain ATCC 204508 / S288c) GN=CDC24 PE=1 SV=2	CDC24_YEAST	97 kDa	NA	0.082	-0.15	13.061	0.380609	13.1	12.88	13.43	13.11	13.16	12.97	12.93	12.93	13.18	12.92
YBR023C	CHS3	2	284428	287925	C	chitin synthase CHS3|KTI2|DIT101|CSD2|CAL1	Chitin synthase III; catalyzes the transfer of N-acetylglucosamine (GlcNAc) to chitin; required for synthesis of the majority of cell wall chitin, the chitin ring during bud emergence, and spore wall chitosan; contains overlapping di-leucine and di-acidic signals that mediate, respectively, intracellular trafficking by AP-1 and trafficking to plasma membrane by exomer complex; requires AP-3 compl…	1529	Chitin synthase 3 OS=Saccharomyces cerevisiae (strain ATCC 204508 / S288c) GN=CHS3 PE=1 SV=3	CHS3_YEAST	132 kDa	NA	0.47	-0.15	13.033	0.794582	13.07	12.58	13.43	13.3	13.04	12.88	12.85	12.85	13.17	13.16
YBR079C	RPG1	2	395383	398277	C	translation initiation factor eIF3 core subunit a|TIF32	eIF3a subunit of the eukaryotic translation initiation factor 3 (eIF3); subunit of the core complex of eIF3; essential for translation; part of a Prt1p-Rpg1p-Nip1p subcomplex that stimulates binding of mRNA and tRNA(i)Met to ribosomes; involved in translation reinitiation; eIF3 is also involved in programmed stop codon readthrough	87	Eukaryotic translation initiation factor 3 subunit A OS=Saccharomyces cerevisiae (strain ATCC 204508 / S288c) GN=RPG1 PE=1 SV=1	EIF3A_YEAST	110 kDa	TRUE	0.00056	-0.15	14.309	0.016969	14.11	13.87	14.82	14.55	14.56	14.37	13.93	14.18	14.54	14.16
YBR115C	LYS2	2	469748	473926	C	L-aminoadipate-semialdehyde dehydrogenase	Alpha aminoadipate reductase; catalyzes the reduction of alpha-aminoadipate to alpha-aminoadipate 6-semialdehyde, which is the fifth step in biosynthesis of lysine; activation requires posttranslational phosphopantetheinylation by Lys5p	309	L-2-aminoadipate reductase OS=Saccharomyces cerevisiae (strain ATCC 204508 / S288c) GN=LYS2 PE=1 SV=2	LYS2_YEAST	155 kDa	NA	0.021	-0.15	13.852	0.174887	13.66	13.43	14.46	13.99	14.09	13.79	13.67	13.72	14.1	13.61
YDL132W	CDC53	4	224304	226751	W	cullin CDC53	Cullin; structural protein of SCF complexes (which also contain Skp1p, Cdc34p, Hrt1p and an F-box protein) involved in ubiquitination; SCF promotes the G1-S transition by targeting G1 cyclins and the Cln-CDK inhibitor Sic1p for degradation; human homolog CUL1 can complement yeast cdc53 null mutant	1369	Cell division control protein 53 OS=Saccharomyces cerevisiae (strain ATCC 204508 / S288c) GN=CDC53 PE=1 SV=1	CDC53_YEAST	94 kDa	NA	0.39	-0.15	12.867	0.735688	12.56	12.49	13.44	13.09	13.11	12.87	12.7	12.78	13.09	12.54
YDR409W	SIZ1	4	1289406	1292120	W	SUMO ligase SIZ1|ULL1	SUMO E3 ligase; promotes attachment of small ubiquitin-related modifier sumo (Smt3p) to primarily cytoplasmic proteins; regulates Rsp5p ubiquitin ligase activity and is in turn itself regulated by Rsp5p; required for sumoylation of septins and histone H3 variant Cse4p, a prerequisite for STUbL-mediated Ub-dependent degradation; localizes to the septin ring; acts as an adapter between E2, Ubc9p an…	1283	E3 SUMO-protein ligase SIZ1 OS=Saccharomyces cerevisiae (strain ATCC 204508 / S288c) GN=SIZ1 PE=1 SV=1	SIZ1_YEAST	101 kDa	NA	0.36	-0.15	11.683	0.720556	11.75	11.93	11.56	11.57	12.05	11.86	11.13	11.64	11.47	11.87
YEL040W	UTR2	5	78053	79456	W	CRH2	Chitin transglycosylase; functions in the transfer of chitin to beta(1-6) and beta(1-3) glucans in the cell wall; similar to and functionally redundant with Crh1; glycosylphosphatidylinositol (GPI)-anchored protein localized to bud neck	1176	Probable glycosidase CRH2 OS=Saccharomyces cerevisiae (strain ATCC 204508 / S288c) GN=UTR2 PE=1 SV=3	CRH2_YEAST	50 kDa	NA	0.31	-0.15	14.177	0.678698	14.11	13.77	14.82	14.24	14.36	14.15	13.68	14.1	14.55	13.99
YEL058W	PCM1	5	43252	44925	W	phosphoacetylglucosamine mutase PCM1|AGM1	Essential N-acetylglucosamine-phosphate mutase; converts GlcNAc-6-P to GlcNAc-1-P, which is a precursor for the biosynthesis of chitin and for the formation of N-glycosylated mannoproteins and glycosylphosphatidylinositol anchors	649	Phosphoacetylglucosamine mutase OS=Saccharomyces cerevisiae (strain ATCC 204508 / S288c) GN=PCM1 PE=1 SV=2	AGM1_YEAST	62 kDa	NA	0.11	-0.15	12.913	0.438983	12.8	12.76	13.27	13.14	13.02	13.11	12.53	12.8	12.98	12.72
YFR049W	YMR31	6	248523	248894	W	KGD4|mitochondrial 37S ribosomal protein YMR31	Subunit of the mitochondrial alpha-ketoglutarate dehydrogenase; recruits E3 subunit (Lpd1p) to the E1-E2 (Kgd1p, Kgd2p) core; has similarity to human mitochondrial ribosomal protein MRP-S36	1001	37S ribosomal protein YMR-31, mitochondrial OS=Saccharomyces cerevisiae (strain ATCC 204508 / S288c) GN=YMR31 PE=1 SV=1	RT31_YEAST	14 kDa	NA	0.24	-0.15	15.085	0.618507	15.3	15.3	15.05	15.25	14.84	14.86	15.27	15.09	14.98	14.91
YGL020C	GET1	7	457163	457870	C	GET complex subunit GET1|MDM39	Subunit of the GET complex; involved in insertion of proteins into the ER membrane; required for the retrieval of HDEL proteins from the Golgi to the ER in an ERD2 dependent fashion and for normal mitochondrial morphology and inheritance	792	Golgi to ER traffic protein 1 OS=Saccharomyces cerevisiae (strain ATCC 204508 / S288c) GN=GET1 PE=1 SV=1	GET1_YEAST	27 kDa	NA	0.16	-0.15	13.413	0.51995	13.23	13.18	13.92	13.61	13.6	13.42	12.97	13.24	13.64	13.32
YGR270W	YTA7	7	1027370	1031509	W		Protein that localizes to chromatin; has a role in regulation of histone gene expression; has a bromodomain-like region that interacts with the N-terminal tail of histone H3, and an ATPase domain; relocalizes to the cytosol in response to hypoxia; potentially phosphorylated by Cdc28p	457	Tat-binding homolog 7 OS=Saccharomyces cerevisiae (strain ATCC 204508 / S288c) GN=YTA7 PE=1 SV=2	TBP7_YEAST	157 kDa	NA	0.052	-0.15	13.423	0.296	13.33	13.23	13.78	13.6	13.52	13.48	13.32	13.32	13.39	13.26
YHR027C	RPN1	8	161730	164711	C	proteasome regulatory particle base subunit RPN1|NAS1|HRD2	Non-ATPase base subunit of the 19S RP of the 26S proteasome; may participate in the recognition of several ligands of the proteasome; contains a leucine-rich repeat (LRR) domain, a site for protein-protein interactions; RP is the acronym for regulatory particle	128	26S proteasome regulatory subunit RPN1 OS=Saccharomyces cerevisiae (strain ATCC 204508 / S288c) GN=RPN1 PE=1 SV=3	RPN1_YEAST	109 kDa	NA	0.001	-0.15	13.982	0.0181119	13.84	13.61	14.49	14.16	14.21	14.12	13.55	13.83	14.11	13.9
YHR186C	KOG1	8	475999	480672	C	ubiquitin-binding TORC1 subunit KOG1|LAS24	Subunit of TORC1; TORC1 is a rapamycin-sensitive complex involved in growth control that contains Tor1p or Tor2p, Lst8p and Tco89p; contains four HEAT repeats and seven WD-40 repeats; may act as a scaffold protein to couple TOR and its effectors	1972	Target of rapamycin complex 1 subunit KOG1 OS=Saccharomyces cerevisiae (strain ATCC 204508 / S288c) GN=KOG1 PE=1 SV=2	KOG1_YEAST	178 kDa	NA	0.68	-0.15	13.031	0.894919	12.98	12.62	13.43	13.21	13.16	13.11	12.73	12.94	13.32	12.81
YIL053W	GPP1	9	255115	255867	W	RHR2|glycerol-1-phosphatase RHR2	Constitutively expressed DL-glycerol-3-phosphate phosphatase; also known as glycerol-1-phosphatase; involved in glycerol biosynthesis, induced in response to both anaerobic and osmotic stress; GPP1 has a paralog, GPP2, that arose from the whole genome duplication	379	Glycerol-1-phosphate phosphohydrolase 1 OS=Saccharomyces cerevisiae (strain ATCC 204508 / S288c) GN=GPP1 PE=1 SV=3	GPP1_YEAST	28 kDa	TRUE	0.034	-0.15	13.413	0.230524	13.53	13.56	13.41	13.46	13.39	13.13	13.82	13.3	13.28	13.25
YJL198W	PHO90	10	60844	63489	W	SPX domain-containing inorganic phosphate transporter	Low-affinity phosphate transporter; acts upstream of Pho81p in regulation of the PHO pathway; deletion of pho84, pho87, pho89, pho90, and pho91 causes synthetic lethality; transcription independent of Pi and Pho4p activity; overexpression results in vigorous growth; PHO90 has a paralog, PHO87, that arose from the whole genome duplication	902	Low-affinity phosphate transporter PHO90 OS=Saccharomyces cerevisiae (strain ATCC 204508 / S288c) GN=PHO90 PE=1 SV=1	PHO90_YEAST	98 kDa	NA	0.2	-0.15	14.627	0.571744	14.6	14.5	14.91	14.68	14.86	14.59	14.25	14.43	14.7	14.75
YKL062W	MSN4	11	323228	325120	W	stress-responsive transcriptional activator MSN4	Stress-responsive transcriptional activator; activated in stochastic pulses of nuclear localization in response to various stress conditions; binds DNA at stress response elements of responsive genes, inducing gene expression; involved in diauxic shift	277	Zinc finger protein MSN4 OS=Saccharomyces cerevisiae (strain ATCC 204508 / S288c) GN=MSN4 PE=1 SV=1	MSN4_YEAST	70 kDa	TRUE	0.016	-0.15	12.094	0.150691	12.29	12.34	12.03	12.18	12.02	11.81	12.25	11.91	12.12	11.99
YKL216W	URA1	11	25215	26159	W	dihydroorotate dehydrogenase	Dihydroorotate dehydrogenase; catalyzes the fourth enzymatic step in the de novo biosynthesis of pyrimidines, converting dihydroorotic acid into orotic acid	47	Dihydroorotate dehydrogenase (fumarate) OS=Saccharomyces cerevisiae (strain ATCC 204508 / S288c) GN=URA1 PE=1 SV=1	PYRD_YEAST	35 kDa	NA	0.0001	-0.15	15.87	0.00438983	16.06	16.17	15.82	15.86	15.82	15.7	15.97	15.81	15.79	15.7
YLR304C	ACO1	12	735212	737548	C	aconitate hydratase ACO1|GLU1	Aconitase; required for the tricarboxylic acid (TCA) cycle and also independently required for mitochondrial genome maintenance; component of the mitochondrial nucleoid; mutation leads to glutamate auxotrophy; human homolog ACO2 can complement yeast null mutant	50	Aconitate hydratase, mitochondrial OS=Saccharomyces cerevisiae (strain ATCC 204508 / S288c) GN=ACO1 PE=1 SV=2	ACON_YEAST	85 kDa	NA	0.0001	-0.15	14.884	0.00438983	14.79	14.65	15.37	14.96	15.14	14.99	14.47	14.72	14.93	14.82
YLR310C	CDC25	12	752224	756993	C	Ras family guanine nucleotide exchange factor CDC25|CDC25'|CTN1	Membrane bound guanine nucleotide exchange factor; also known as a GEF or GDP-release factor; indirectly regulates adenylate cyclase through activation of Ras1p and Ras2p by stimulating the exchange of GDP for GTP; required for progression through G1; thermosensitivity of the cdc25-5 mutant is functionally complemented by human RASGRF1 or by a fragment of human SOS1 comprising the CDC25-related c…	407	Cell division control protein 25 OS=Saccharomyces cerevisiae (strain ATCC 204508 / S288c) GN=CDC25 PE=1 SV=1	CDC25_YEAST	179 kDa	TRUE	0.039	-0.15	13.068	0.250025	13.11	13.09	13.18	13.11	13.2	12.9	13.09	12.94	13.12	12.94
YLR347C	KAP95	12	823828	826413	C	karyopherin beta|RSL1	Karyopherin beta; forms a complex with Srp1p/Kap60p; interacts with nucleoporins to mediate nuclear import of NLS-containing cargo proteins via the nuclear pore complex; regulates PC biosynthesis; GDP-to-GTP exchange factor for Gsp1p	361	Importin subunit beta-1 OS=Saccharomyces cerevisiae (strain ATCC 204508 / S288c) GN=KAP95 PE=1 SV=1	IMB1_YEAST	95 kDa	NA	0.031	-0.15	12.491	0.224902	12.27	12.1	13.05	12.64	12.8	12.47	12.22	12.35	12.68	12.33
YMR109W	MYO5	13	486587	490246	W	myosin 5	One of two type I myosin motors; contains proline-rich tail homology 2 (TH2) and SH3 domains; MYO5 deletion has little effect on growth, but myo3 myo5 double deletion causes severe defects in growth and actin cytoskeleton organization; MYO5 has a paralog, MYO3, that arose from the whole genome duplication	349	Myosin-5 OS=Saccharomyces cerevisiae (strain ATCC 204508 / S288c) GN=MYO5 PE=1 SV=1	MYO5_YEAST	137 kDa	TRUE	0.029	-0.15	13.844	0.215833	13.81	13.64	14.08	14.09	13.97	13.73	13.72	13.68	13.94	13.78
YOL151W	GRE2	15	43694	44722	W	methylglyoxal reductase (NADPH-dependent) GRE2	3-methylbutanal reductase and NADPH-dependent methylglyoxal reductase; stress induced (osmotic, ionic, oxidative, heat shock and heavy metals); regulated by the HOG pathway; restores resistance to glycolaldehyde by coupling reduction of glycolaldehyde to ethylene glycol and oxidation of NADPH to NADP+; protein abundance increases in response to DNA replication stress; methylglyoxal reductase (NAD…	78	NADPH-dependent methylglyoxal reductase GRE2 OS=Saccharomyces cerevisiae (strain ATCC 204508 / S288c) GN=GRE2 PE=1 SV=1	GRE2_YEAST	38 kDa	NA	0.00035	-0.15	14.573	0.0119276	14.71	14.77	14.53	14.6	14.6	14.42	14.74	14.45	14.49	14.42
YOR206W	NOC2	15	727512	729644	W	mRNA-binding ribosome synthesis protein NOC2	Protein involved in ribosome biogenesis; forms a nucleolar complex with Mak21p that binds to 90S and 66S pre-ribosomes; forms a nuclear complex with Noc3p that binds to 66S pre-ribosomes; both complexes mediate intranuclear transport of ribosomal precursors; acts as part of a Mak21p-Noc2p-Rrp5p module that associates with nascent pre-rRNA during transcription and has a role in bigenesis of the la…	391	Nucleolar complex protein 2 OS=Saccharomyces cerevisiae (strain ATCC 204508 / S288c) GN=NOC2 PE=1 SV=2	NOC2_YEAST	82 kDa	NA	0.036	-0.15	13.955	0.239077	13.81	13.55	14.63	14.1	14.12	14.01	13.63	13.74	14.18	13.78
YOR326W	MYO2	15	925721	930445	W	myosin 2|CDC66	Type V myosin motor involved in actin-based transport of cargos; required for the polarized delivery of secretory vesicles, the vacuole, late Golgi elements, peroxisomes, and the mitotic spindle; MYO2 has a paralog, MYO4, that arose from the whole genome duplication	692	Myosin-2 OS=Saccharomyces cerevisiae (strain ATCC 204508 / S288c) GN=MYO2 PE=1 SV=1	MYO2_YEAST	181 kDa	TRUE	0.13	-0.15	12.933	0.470909	12.86	12.72	13.22	13.16	13.11	12.8	12.63	12.82	13.05	12.96
YPR164W	MMS1	16	870703	874926	W	SLM6|RTT108	Subunit of E3 ubiquitin ligase complex involved in replication repair; stabilizes protein components of the replication fork such as the fork-pausing complex and leading strand polymerase, preventing fork collapse and promoting efficient recovery during replication stress; regulates Ty1 transposition; involved with Rtt101p in nonfunctional rRNA decay	1112	E3 ubiquitin-protein ligase linker protein MMS1 OS=Saccharomyces cerevisiae (strain ATCC 204508 / S288c) GN=MMS1 PE=1 SV=1	MMS1_YEAST	161 kDa	NA	0.28	-0.15	13.521	0.649821	13.21	13.25	14.14	13.78	13.59	13.4	13.31	13.41	13.72	13.4
YAL046C	BOL3	1	57029	57385	C	AIM1	Protein involved in Fe-S cluster transfer to mitochondrial clients; protects [4Fe-4S] clusters from damage due to oxidative stress by acting along with Nfu1p at a late step in the transfer of [4Fe-4S] clusters from the ISA complex to mitochondrial client proteins like lipoate synthase and succinate dehydrogenase; sequence similarity to human BOLA family member, BOLA3, mutations of which are assoc…	1562	Altered inheritance of mitochondria protein 1 OS=Saccharomyces cerevisiae (strain ATCC 204508 / S288c) GN=AIM1 PE=1 SV=1	AIM1_YEAST	13 kDa	NA	0.48	-0.14	13.167	0.8	13.36	13.38	13.04	13.38	12.88	12.97	13.29	13.07	13.13	13.17
YCL057C-A	MIC10	3	24032	24325	C	MOS1|MCS10|MIO10	Conserved component of the MICOS complex; MICOS (formerly MINOS or MitOS) is a mitochondrial inner membrane complex that extends into the intermembrane space and has a role in the maintenance of crista junctions, inner membrane architecture, and formation of contact sites to the outer membrane; forms a subcomplex with Mic12p and Mic27p whose assembly and stability requires cardiolipin; homo-oligo…	448	MICOS complex subunit MIC10 OS=Saccharomyces cerevisiae (strain ATCC 204508 / S288c) GN=MIC10 PE=1 SV=1	MIC10_YEAST	10 kDa	NA	0.05	-0.14	14.063	0.291667	14.23	14.27	14.11	14.13	13.94	13.97	14.14	13.75	14.11	13.98
YCR054C	CTR86	3	218376	220067	C		Essential protein of unknown function; with orthologs in Ashbya gossypii and Candida albicans; similar to human ATXN10, mutations in which cause spinocerebellar ataxia type 10; codon usage corresponds to that observed for yeast genes expressed at low levels; relative distribution to the nucleus increases upon DNA replication stress	896	Copper transport protein 86 OS=Saccharomyces cerevisiae (strain ATCC 204508 / S288c) GN=CTR86 PE=1 SV=1	CTR86_YEAST	65 kDa	NA	0.2	-0.14	12.11	0.571744	11.92	11.89	12.49	12.47	12.23	12.16	11.88	11.78	12.21	12.07
YDL063C	SYO1	4	338272	340134	C		Transport adaptor or symportin; facilitates synchronized nuclear coimport of the two 5S-rRNA binding proteins Rpl5p and Rpl11p; binds to nascent Rpl5p during translation; required for biogenesis of the large ribosomal subunit; green fluorescent protein (GFP)-fusion protein localizes to the cytoplasm and nucleus	1328	Synchronized import protein 1 OS=Saccharomyces cerevisiae (strain ATCC 204508 / S288c) GN=SYO1 PE=1 SV=1	SYO1_YEAST	70 kDa	NA	0.37	-0.14	12.762	0.725985	12.59	12.38	13.27	12.88	12.97	12.54	12.67	12.67	12.94	12.71
YDL164C	CDC9	4	164987	167254	C	DNA ligase (ATP) CDC9|MMS8	DNA ligase I found in nucleus and mitochondria; essential enzyme that joins Okazaki fragments during DNA replication; also acts in ribonucleotide excision repair, base excision repair, and recombination; DNA ligase I mutants trigger ubiquitination of PCNA at K107, facilitating Rad59p-mediated bypass of unligated Okazaki fragments; human homolog LIG1 can complement yeast cdc9 temperature-sensitive…	598	Isoform Nuclear of DNA ligase 1 OS=Saccharomyces cerevisiae (strain ATCC 204508 / S288c) GN=CDC9	DNLI1_YEAST	?	NA	0.095	-0.14	12.879	0.412144	12.82	12.57	13.19	13.19	12.95	12.96	12.58	12.72	12.98	12.83
YDR127W	ARO1	4	704484	709250	W	pentafunctional protein ARO1p	Pentafunctional arom protein; catalyzes steps 2 through 6 in the biosynthesis of chorismate, which is a precursor to aromatic amino acids	64	Pentafunctional AROM polypeptide OS=Saccharomyces cerevisiae (strain ATCC 204508 / S288c) GN=ARO1 PE=1 SV=1	ARO1_YEAST	175 kDa	NA	0.00012	-0.14	14.038	0.0050129	13.8	13.67	14.55	14.23	14.34	14.09	13.58	13.93	14.29	13.9
YDR463W	STP1	4	1386816	1388375	W	SSY2|BAP1	Transcription factor; contains a N-terminal regulatory motif (RI) that acts as a cytoplasmic retention determinant and as an Asi dependent degron in the nucleus; undergoes proteolytic processing by SPS (Ssy1p-Ptr3p-Ssy5p)-sensor component Ssy5p in response to extracellular amino acids; activates transcription of amino acid permease genes and may have a role in tRNA processing; STP1 has a paralog,…	892	Transcription factor STP1 OS=Saccharomyces cerevisiae (strain ATCC 204508 / S288c) GN=STP1 PE=1 SV=3	STP1_YEAST	58 kDa	NA	0.2	-0.14	12.013	0.571744	12.2	12.18	11.84	12.14	12.03	11.85	12.23	11.86	11.94	11.86
YER070W	RNR1	5	298950	301616	W	ribonucleotide-diphosphate reductase subunit RNR1|SDS12|RIR1|CRT7	Major isoform of large subunit of ribonucleotide-diphosphate reductase; the RNR complex catalyzes rate-limiting step in dNTP synthesis, regulated by DNA replication and DNA damage checkpoint pathways via localization of small subunits; relative distribution to the nucleus increases upon DNA replication stress; RNR1 has a paralog, RNR3, that arose from the whole genome duplication	483	Cluster of Ribonucleoside-diphosphate reductase large chain 1 OS=Saccharomyces cerevisiae (strain ATCC 204508 / S288c) GN=RNR1 PE=1 SV=2 (RIR1_YEAST)	RIR1_YEAST [2]	100 kDa	TRUE	0.058	-0.14	12.964	0.311015	12.82	12.58	13.44	13.14	13.2	12.94	12.82	12.84	13.11	12.75
YGR116W	SPT6	7	720409	724764	W	chromatin-remodeling histone chaperone SPT6|SSN20|CRE2	Nucleosome remodeling protein; functions in various aspects of transcription, chromatin maintenance, and RNA processing; required for the maintenance of chromatin structure during transcription in order to inhibit transcription from promoters within the coding region; required for H3K36 trimethylation but not dimethylation by Set2p	1275	Transcription elongation factor SPT6 OS=Saccharomyces cerevisiae (strain ATCC 204508 / S288c) GN=SPT6 PE=1 SV=1	SPT6_YEAST	168 kDa	NA	0.35	-0.14	12.89	0.714905	12.76	12.62	13.37	13.05	12.99	12.82	12.89	12.77	12.98	12.65
YGR271C-A	EFG1	7	1037800	1038501	C	YGR272C	Essential protein required for maturation of 18S rRNA; null mutant is sensitive to hydroxyurea and is delayed in recovering from alpha-factor arrest; green fluorescent protein (GFP)-fusion protein localizes to the nucleolus	601	rRNA-processing protein EFG1 OS=Saccharomyces cerevisiae (strain ATCC 204508 / S288c) GN=EFG1 PE=1 SV=2	EFG1P_YEAST	27 kDa	NA	0.095	-0.14	13.789	0.412144	13.9	13.94	13.84	13.87	13.68	13.65	13.9	13.76	13.68	13.67
YHL009C	YAP3	8	84068	85060	C		Basic leucine zipper (bZIP) transcription factor	247	AP-1-like transcription factor YAP3 OS=Saccharomyces cerevisiae (strain ATCC 204508 / S288c) GN=YAP3 PE=1 SV=1	YAP3_YEAST	38 kDa	NA	0.01	-0.14	13.368	0.104858	13.54	13.54	13.34	13.38	13.32	13.09	13.75	13.22	13.25	13.25
YHR049W	FSH1	8	206462	207193	W	putative serine hydrolase	Putative serine hydrolase; localizes to both the nucleus and cytoplasm; sequence is similar to S. cerevisiae Fsh2p and Fsh3p and the human candidate tumor suppressor OVCA2	286	Family of serine hydrolases 1 OS=Saccharomyces cerevisiae (strain ATCC 204508 / S288c) GN=FSH1 PE=1 SV=1	FSH1_YEAST	27 kDa	NA	0.017	-0.14	15.481	0.153951	15.58	15.77	15.41	15.46	15.48	15.32	15.67	15.37	15.44	15.31
YIR037W	HYR1	9	423128	423619	W	peroxiredoxin HYR1|ORP1|GPX3	Thiol peroxidase; functions as a hydroperoxide receptor to sense intracellular hydroperoxide levels and transduce a redox signal to the Yap1p transcription factor; HYR1 has a paralog, GPX1, that arose from the whole genome duplication	1050	Peroxiredoxin HYR1 OS=Saccharomyces cerevisiae (strain ATCC 204508 / S288c) GN=HYR1 PE=1 SV=1	GPX3_YEAST	19 kDa	TRUE	0.26	-0.14	15.522	0.635283	15.7	15.71	15.49	15.53	15.4	15.33	15.98	15.36	15.44	15.28
YJL010C	NOP9	10	417562	419562	C	RNA-binding RNA processing protein NOP9	Essential subunit of U3-containing 90S preribosome; involved in production of 18S rRNA and assembly of small ribosomal subunit; also part of pre-40S ribosome and required for its export into cytoplasm; binds RNA and contains pumilio domain	643	Nucleolar protein 9 OS=Saccharomyces cerevisiae (strain ATCC 204508 / S288c) GN=NOP9 PE=1 SV=1	NOP9_YEAST	78 kDa	TRUE	0.11	-0.14	13.323	0.438983	13.24	13.03	13.62	13.53	13.52	13.4	13.16	13.11	13.39	13.23
YJL039C	NUP192	10	368748	373799	C		Essential subunit of inner ring of nuclear pore complex (NPC); plays a role in modulating transport through the NPC; homologous to human NUP205	393	Nucleoporin NUP192 OS=Saccharomyces cerevisiae (strain ATCC 204508 / S288c) GN=NUP192 PE=1 SV=1	NU192_YEAST	192 kDa	NA	0.036	-0.14	14.575	0.239077	14.76	14.66	14.61	14.6	14.55	14.46	14.62	14.48	14.56	14.45
YJR137C	MET5	10	678957	683285	C	sulfite reductase (NADPH) subunit beta|ECM17	Sulfite reductase beta subunit; involved in amino acid biosynthesis, transcription repressed by methionine	175	Sulfite reductase [NADPH] subunit beta OS=Saccharomyces cerevisiae (strain ATCC 204508 / S288c) GN=MET5 PE=1 SV=1	MET5_YEAST	161 kDa	TRUE	0.004	-0.14	14.264	0.0578771	14.17	14.13	14.78	14.3	14.47	14.14	14.02	14.16	14.27	14.2
YKR060W	UTP30	11	556518	557342	W		Putative subunit of U3-containing 90S preribosome complex; complex is involved in production of 18S rRNA and assembly of small ribosomal subunit	438	Ribosome biogenesis protein UTP30 OS=Saccharomyces cerevisiae (strain ATCC 204508 / S288c) GN=UTP30 PE=1 SV=1	RL1D1_YEAST	32 kDa	NA	0.046	-0.14	11.462	0.273885	11.62	11.75	11.38	11.55	11.45	11.61	10.95	11.41	11.41	11.49
YLL010C	PSR1	12	129330	130613	C	phosphatase	Plasma membrane associated protein phosphatase; involved in the general stress response; required along with binding partner Whi2p for full activation of STRE-mediated gene expression, possibly through dephosphorylation of Msn2p; PSR1 has a paralog, PSR2, that arose from the whole genome duplication	241	Phosphatase PSR1 OS=Saccharomyces cerevisiae (strain ATCC 204508 / S288c) GN=PSR1 PE=1 SV=1	PSR1_YEAST	48 kDa	TRUE	0.009	-0.14	13.606	0.0975314	13.72	13.76	13.59	13.69	13.64	13.71	13.2	13.61	13.63	13.51
YLR300W	EXG1	12	728955	730301	W	glucan 1,3-beta-glucosidase|SCW6|BGL1	Major exo-1,3-beta-glucanase of the cell wall; involved in cell wall beta-glucan assembly; exists as three differentially glycosylated isoenzymes; EXG1 has a paralog, SPR1, that arose from the whole genome duplication	141	Glucan 1,3-beta-glucosidase I/II OS=Saccharomyces cerevisiae (strain ATCC 204508 / S288c) GN=EXG1 PE=1 SV=1	EXG1_YEAST	51 kDa	NA	0.001	-0.14	12.469	0.0181119	12.62	12.64	12.45	12.64	12.33	12.34	12.62	12.31	12.33	12.41
YLR409C	UTP21	12	934414	937233	C	rRNA-processing protein UTP21	Subunit of U3-containing 90S preribosome and SSU processome complexes; involved in production of 18S rRNA and assembly of small ribosomal subunit; synthetic defect with STI1 Hsp90 cochaperone; human homolog linked to glaucoma; Small Subunit processome is also known as SSU processome	937	U3 small nucleolar RNA-associated protein 21 OS=Saccharomyces cerevisiae (strain ATCC 204508 / S288c) GN=UTP21 PE=1 SV=1	UTP21_YEAST	105 kDa	NA	0.22	-0.14	13.94	0.594161	13.8	13.62	14.41	14.26	13.99	13.85	14.03	13.7	13.97	13.77
YLR413W	INA1	12	951156	953183	W		Protein of unknown function; not an essential gene; YLR413W has a paralog, FAT3, that arose from the whole genome duplication	1926	Cell membrane protein YLR413W OS=Saccharomyces cerevisiae (strain ATCC 204508 / S288c) GN=YLR413W PE=1 SV=1	YL413_YEAST	73 kDa	NA	0.65	-0.14	13.461	0.879112	13.38	13.25	13.68	13.48	13.57	13.35	14.07	13.1	13.43	13.3
YMR174C	PAI3	13	610159	610365	C	IA3	Cytoplasmic proteinase A (Pep4p) inhibitor; dependent on Pbs2p and Hog1p protein kinases for osmotic induction; intrinsically unstructured, N-terminal half becomes ordered in the active site of proteinase A upon contact	1210	Protease A inhibitor 3 OS=Saccharomyces cerevisiae (strain ATCC 204508 / S288c) GN=PAI3 PE=1 SV=1	IPA3_YEAST	8 kDa	NA	0.32	-0.14	13.771	0.685525	13.95	13.83	13.99	13.77	13.65	13.66	13.8	13.76	13.63	13.67
YMR231W	PEP5	13	733545	736634	W	tethering complex subunit PEP5|VPT11|VPS11|VPL9|VAM1|END1	Histone E3 ligase, component of CORVET membrane tethering complex; peripheral vacuolar membrane protein required for protein trafficking and vacuole biogenesis; interacts with Pep7p; involved in ubiquitination and degradation of excess histones	1192	E3 ubiquitin-protein ligase PEP5 OS=Saccharomyces cerevisiae (strain ATCC 204508 / S288c) GN=PEP5 PE=1 SV=2	PEP5_YEAST	117 kDa	NA	0.31	-0.14	11.822	0.678698	11.81	11.43	12.29	12.02	11.95	11.84	11.39	11.81	12.2	11.48
YMR247C	RKR1	13	763351	768039	C	ubiquitin-protein ligase RKR1|LTN1	RING domain E3 ubiquitin ligase; involved in ubiquitin-mediated degradation of non-stop proteins and translationally stalled ER membrane proteins; component of ribosome-bound RQC (ribosome quality control) complex; degrades products of mRNAs lacking a termination codon regardless of a poly(A) tail; functional connections to chromatin modification; homolog of mouse Listerin, mutations in which rep…	1037	E3 ubiquitin-protein ligase listerin OS=Saccharomyces cerevisiae (strain ATCC 204508 / S288c) GN=RKR1 PE=1 SV=1	LTN1_YEAST	180 kDa	NA	0.25	-0.14	11.873	0.628031	11.75	11.55	12.53	11.96	12	11.65	11.66	11.84	12.15	11.64
YNL163C	RIA1	14	326741	330073	C	GTPase RIA1|EFL1	Cytoplasmic GTPase/eEF2-like factor involved in ribosomal biogenesis; with Sdo1p, a guanine nucleotide exchange factor (GEF), promotes release of Tif6p from 60S ribosomal subunits in the cytoplasm so that they can assemble with 40S subunits to generate mature ribosomes; required for quality control check of newly made large ribosomal subunits before they are released into the pool of translating …	496	Ribosome assembly protein 1 OS=Saccharomyces cerevisiae (strain ATCC 204508 / S288c) GN=RIA1 PE=1 SV=1	RIA1_YEAST	124 kDa	NA	0.06	-0.14	12.788	0.315213	12.6	12.63	13.2	12.92	13.05	12.9	12.24	12.71	12.93	12.7
YNL169C	PSD1	14	316169	317671	C	phosphatidylserine decarboxylase 1	Phosphatidylserine decarboxylase of the mitochondrial inner membrane; converts phosphatidylserine to phosphatidylethanolamine; regulates mitochondrial fusion and morphology by affecting lipid mixing in the mitochondrial membrane and by influencing the ratio of long to short forms of Mgm1p; partly exposed to the mitochondrial intermembrane space; autocatalytically processed	1293	Phosphatidylserine decarboxylase proenzyme 1, mitochondrial OS=Saccharomyces cerevisiae (strain ATCC 204508 / S288c) GN=PSD1 PE=1 SV=1	PSD1_YEAST	57 kDa	NA	0.36	-0.14	13.69	0.720556	13.52	13.27	14.22	13.86	13.94	13.77	13.36	13.3	13.88	13.78
YOR014W	RTS1	15	357674	359947	W	protein phosphatase 2A regulatory subunit RTS1|SCS1	B-type regulatory subunit of protein phosphatase 2A (PP2A); Rts1p and Cdc55p are alternative regulatory subunits for PP2A catalytic subunits, Pph21p and Pph22p; PP2A-Rts1p protects cohesin when recruited by Sgo1p to the pericentromere; highly enriched at centromeres in the absence of Cdc55p; required for maintenance of septin ring organization during cytokinesis, for ring disassembly in G1 and fo…	281	Serine/threonine-protein phosphatase 2A 56 kDa regulatory subunit delta isoform OS=Saccharomyces cerevisiae (strain ATCC 204508 / S288c) GN=RTS1 PE=1 SV=2	2A5D_YEAST	85 kDa	NA	0.017	-0.14	12.63	0.153951	12.62	12.45	13.01	12.73	12.73	12.57	12.63	12.53	12.66	12.37
YOR089C	VPS21	15	490196	490828	C	Rab family GTPase VPS21|YPT51|YPT21|VPT12|VPS12	Endosomal Rab family GTPase; required for endocytic transport and sorting of vacuolar hydrolases; required for endosomal localization of the CORVET complex; required with YPT52 for MVB biogenesis and sorting; involved in autophagy and ionic stress tolerance; geranylgeranylation required for membrane association; protein abundance increases in response to DNA replication stress; mammalian Rab5 hom…	305	Vacuolar protein sorting-associated protein 21 OS=Saccharomyces cerevisiae (strain ATCC 204508 / S288c) GN=VPS21 PE=1 SV=1	VPS21_YEAST	23 kDa	NA	0.02	-0.14	13.136	0.171523	13	12.93	13.62	13.31	13.22	13.14	12.92	12.97	13.32	12.93
YPL126W	NAN1	16	310210	312900	W	UTP17	U3 snoRNP protein; component of the small (ribosomal) subunit (SSU) processosome containing U3 snoRNA; required for the biogenesis of18S rRNA	381	NET1-associated nuclear protein 1 OS=Saccharomyces cerevisiae (strain ATCC 204508 / S288c) GN=NAN1 PE=1 SV=1	UTP17_YEAST	101 kDa	NA	0.034	-0.14	14.422	0.230524	14.37	14.21	14.82	14.51	14.63	14.45	13.97	14.39	14.53	14.34
YPL141C	FRK1	16	283464	286061	C	protein kinase FRK1	Protein kinase of unknown cellular role; green fluorescent protein (GFP)-fusion protein localizes to the cytoplasm; interacts with rRNA transcription and ribosome biogenesis factors and the long chain fatty acyl-CoA synthetase Faa3p; FRK1 has a paralog, KIN4, that arose from the whole genome duplication	419	Fatty acyl-CoA synthetase and RNA processing-associated kinase 1 OS=Saccharomyces cerevisiae (strain ATCC 204508 / S288c) GN=FRK1 PE=1 SV=1	FRK1_YEAST	98 kDa	TRUE	0.042	-0.14	11.927	0.260239	12.05	11.86	12.03	12.02	12	11.78	11.96	11.71	11.88	11.98
YPR181C	SEC23	16	897361	899667	C	GTPase-activating protein SEC23	GTPase-activating protein, stimulates the GTPase activity of Sar1p; component of the Sec23p-Sec24p heterodimer of the COPII vesicle coat, involved in ER to Golgi transport; substrate of Ubp3/Bre5 complex; ubiquitylated by Ub-ligase Rsp5p; proteasome-mediated degradation of Sec23p is regulated by Cdc48p	569	Protein transport protein SEC23 OS=Saccharomyces cerevisiae (strain ATCC 204508 / S288c) GN=SEC23 PE=1 SV=1	SEC23_YEAST	85 kDa	NA	0.086	-0.14	13.41	0.394929	13.16	13.01	13.91	13.72	13.64	13.4	13.05	13.36	13.55	13.3
YAL035W	FUN12	1	76427	79435	W	translation initiation factor eIF5B|eIF5B|yIF2	Translation initiation factor eIF5B; GTPase that promotes Met-tRNAiMet binding to ribosomes and ribosomal subunit joining; promotes GTP-dependent maturation of 18S rRNA by Nob1p; protein abundance increases in response to DNA replication stress; homolog of bacterial IF2	148	Eukaryotic translation initiation factor 5B OS=Saccharomyces cerevisiae (strain ATCC 204508 / S288c) GN=FUN12 PE=1 SV=2	IF2P_YEAST	112 kDa	TRUE	0.002	-0.13	13.942	0.0329936	13.8	13.68	14.42	14.09	14.15	14.06	13.55	13.79	14.09	13.79
YBR058C	UBP14	2	353672	356017	C	ubiquitin-specific protease UBP14|GID6	Ubiquitin-specific protease; specifically disassembles unanchored ubiquitin chains; involved in fructose-1,6-bisphosphatase (Fbp1p) degradation; similar to human isopeptidase T	1360	Ubiquitin carboxyl-terminal hydrolase 14 OS=Saccharomyces cerevisiae (strain ATCC 204508 / S288c) GN=UBP14 PE=1 SV=2	UBP14_YEAST	89 kDa	NA	0.39	-0.13	12.394	0.735688	12.38	11.89	12.93	12.51	12.55	12.64	12.01	12.14	12.51	12.38
YBR078W	ECM33	2	393123	394742	W		GPI-anchored protein of unknown function; possible role in apical bud growth; GPI-anchoring on the plasma membrane crucial to function; phosphorylated in mitochondria; similar to Sps2p; ECM33 has a paralog, PST1, that arose from the whole genome duplication	644	Cell wall protein ECM33 OS=Saccharomyces cerevisiae (strain ATCC 204508 / S288c) GN=ECM33 PE=1 SV=3	ECM33_YEAST	44 kDa	NA	0.11	-0.13	14.097	0.438983	14.04	14.05	14.46	14.27	14.14	13.71	13.92	14.14	14.08	14.16
YBR084W	MIS1	2	411054	413981	W	trifunctional formate-tetrahydrofolate ligase/methenyltetrahydrofolate cyclohydrolase/methylenetetrahydrofolate dehydrogenase MIS1	Mitochondrial C1-tetrahydrofolate synthase; involved in interconversion between different oxidation states of tetrahydrofolate (THF); provides activities of formyl-THF synthetase, methenyl-THF cyclohydrolase, and methylene-THF dehydrogenase	265	C-1-tetrahydrofolate synthase, mitochondrial OS=Saccharomyces cerevisiae (strain ATCC 204508 / S288c) GN=MIS1 PE=1 SV=1	C1TM_YEAST	106 kDa	TRUE	0.014	-0.13	13.319	0.13683	13.12	13	13.82	13.46	13.51	13.33	13.01	13.27	13.52	13.15
YCR063W	BUD31	3	228318	228791	W	U2 snRNP complex subunit BUD31|CWC14	Component of the SF3b subcomplex of the U2 snRNP; increases efficiency of first and second step pre-mRNA splicing; diploid mutants display a random budding pattern instead of the wild-type bipolar pattern; facilitates passage through G1/S Start, but is not required for G2/M transition or exit from mitosis	537	Pre-mRNA-splicing factor BUD31 OS=Saccharomyces cerevisiae (strain ATCC 204508 / S288c) GN=BUD31 PE=1 SV=1	BUD31_YEAST	18 kDa	NA	0.074	-0.13	13.776	0.359587	13.93	14.13	13.68	13.89	13.6	13.42	14.07	13.81	13.61	13.62
YDR454C	GUK1	4	1366264	1366827	C	BRA3|guanylate kinase|PUR5	Guanylate kinase; converts GMP to GDP; required for growth and mannose outer chain elongation of cell wall N-linked glycoproteins	1537	Guanylate kinase OS=Saccharomyces cerevisiae (strain ATCC 204508 / S288c) GN=GUK1 PE=1 SV=2	KGUA_YEAST	21 kDa	NA	0.47	-0.13	13.669	0.794582	13.72	13.73	13.82	13.66	13.53	13.29	14.41	13.57	13.65	13.31
YEL032W	MCM3	5	86937	89852	W	MCM DNA helicase complex subunit MCM3	Protein involved in DNA replication; component of the Mcm2-7 hexameric helicase complex that binds chromatin as a part of the pre-replicative complex	1305	DNA replication licensing factor MCM3 OS=Saccharomyces cerevisiae (strain ATCC 204508 / S288c) GN=MCM3 PE=1 SV=1	MCM3_YEAST	108 kDa	NA	0.37	-0.13	12.08	0.725985	11.93	11.77	12.33	12.39	12.29	12.12	11.64	11.97	12.09	12.27
YER120W	SCS2	5	401135	401869	W	phosphatidylinositol-binding protein SCS2	Integral ER membrane protein, regulates phospholipid metabolism; one of 6 proteins (Ist2p, Scs2p, Scs22p, Tcb1p, Tcb2p, Tcb3p) that connect ER to plasma membrane (PM) and regulate PI4P levels by controlling access of Sac1p phosphatase to substrate PI4P in the PM; interacts with FFAT motifs in Opi1p, Swh1p, Osh2p, and Osh3p; involved in telomeric silencing; VAP homolog; SCS2 has a paralog, SCS22, …	130	Vesicle-associated membrane protein-associated protein SCS2 OS=Saccharomyces cerevisiae (strain ATCC 204508 / S288c) GN=SCS2 PE=1 SV=3	SCS2_YEAST	27 kDa	NA	0.001	-0.13	12.594	0.0181119	12.64	12.43	12.88	12.62	12.77	12.65	12.31	12.4	12.67	12.57
YFL017C	GNA1	6	103983	104462	C	glucosamine 6-phosphate N-acetyltransferase|PAT1	Glucosamine-6-phosphate acetyltransferase; evolutionarily conserved; required for multiple cell cycle events including passage through START, DNA synthesis, and mitosis; involved in UDP-N-acetylglucosamine synthesis, forms GlcNAc6P from AcCoA	294	Glucosamine 6-phosphate N-acetyltransferase OS=Saccharomyces cerevisiae (strain ATCC 204508 / S288c) GN=GNA1 PE=1 SV=1	GNA1_YEAST	18 kDa	NA	0.018	-0.13	13.752	0.159658	13.94	13.89	13.71	13.85	13.71	13.54	13.86	13.7	13.67	13.65
YGL055W	OLE1	7	398628	400160	W	stearoyl-CoA 9-desaturase|MDM2	Delta(9) fatty acid desaturase; required for monounsaturated fatty acid synthesis and for normal distribution of mitochondria	852	Acyl-CoA desaturase 1 OS=Saccharomyces cerevisiae (strain ATCC 204508 / S288c) GN=OLE1 PE=1 SV=2	ACO1_YEAST	58 kDa	NA	0.18	-0.13	13.031	0.549764	12.96	12.83	13.47	13.26	13.07	12.71	13.08	12.74	13.19	13
YGL252C	RTG2	7	25718	27484	C		Sensor of mitochondrial dysfunction; regulates the subcellular location of Rtg1p and Rtg3p, transcriptional activators of the retrograde (RTG) and TOR pathways; Rtg2p is inhibited by the phosphorylated form of Mks1p	1205	Retrograde regulation protein 2 OS=Saccharomyces cerevisiae (strain ATCC 204508 / S288c) GN=RTG2 PE=1 SV=2	RTG2_YEAST	66 kDa	NA	0.32	-0.13	11.515	0.685525	11.54	11.16	11.81	11.89	11.66	11.45	11.08	11.46	11.46	11.64
YGR245C	SDA1	7	979765	982068	C		Protein required for actin organization and passage through Start; highly conserved nuclear protein; required for actin cytoskeleton organization; plays a critical role in G1 events; binds Nap1p; involved in 60S ribosome biogenesis	1070	Protein SDA1 OS=Saccharomyces cerevisiae (strain ATCC 204508 / S288c) GN=SDA1 PE=1 SV=1	SDA1_YEAST	87 kDa	NA	0.27	-0.13	13.121	0.64333	13.01	12.73	13.68	13.35	13.2	13.19	12.78	13.03	13.28	12.96
YHR031C	RRM3	8	170799	172970	C	RTT104	DNA helicase involved in rDNA replication and Ty1 transposition; binds to and suppresses DNA damage at G4 motifs in vivo; relieves replication fork pauses at telomeric regions; structurally and functionally related to Pif1p	2282	ATP-dependent DNA helicase RRM3 OS=Saccharomyces cerevisiae (strain ATCC 204508 / S288c) GN=RRM3 PE=1 SV=1	RRM3_YEAST	82 kDa	TRUE	0.83	-0.13	12.421	0.948676	12.23	12.31	12.62	12.47	12.46	12.15	13.18	12.53	12.23	12.03
YHR115C	DMA1	8	340109	341359	C	ubiquitin-conjugating protein DMA1|CHF1	Ubiquitin-protein ligase (E3); controls septin dynamics, spindle position checkpoint (SPOC) with ligase Dma2p by regulating recruitment of Elm1p to bud neck; regulates levels of eIF2 subunit Gcd11p, as well as abundance, localization, and ubiquitination of Cdk inhibitory kinase Swe1p; ubiquitinates cyclin Pcl1p; ortholog of human RNF8, similar to human Chfr; contains FHA, RING fingers; DMA1 has a…	930	E3 ubiquitin-protein ligase DMA1 OS=Saccharomyces cerevisiae (strain ATCC 204508 / S288c) GN=DMA1 PE=1 SV=1	DMA1_YEAST	46 kDa	TRUE	0.21	-0.13	13.721	0.586731	14.02	13.9	13.71	13.59	13.72	13.81	13.49	13.61	13.61	13.75
YIL125W	KGD1	9	122689	125733	W	alpha-ketoglutarate dehydrogenase KGD1|OGD1	Subunit of the mitochondrial alpha-ketoglutarate dehydrogenase complex; catalyzes a key step in the tricarboxylic acid (TCA) cycle, the oxidative decarboxylation of alpha-ketoglutarate to form succinyl-CoA	583	2-oxoglutarate dehydrogenase, mitochondrial OS=Saccharomyces cerevisiae (strain ATCC 204508 / S288c) GN=KGD1 PE=1 SV=2	ODO1_YEAST	114 kDa	NA	0.091	-0.13	14.089	0.405663	13.83	13.64	14.71	14.26	14.38	14.21	13.54	13.95	14.36	14.01
YIL130W	ASG1	9	102782	105676	W		Zinc cluster protein proposed to be a transcriptional regulator; regulator involved in the stress response; null mutants have a respiratory deficiency, calcofluor white sensitivity and slightly increased cycloheximide resistance	808	Activator of stress genes 1 OS=Saccharomyces cerevisiae (strain ATCC 204508 / S288c) GN=ASG1 PE=1 SV=1	ASG1_YEAST	109 kDa	NA	0.17	-0.13	13.74	0.530482	13.75	13.51	14.1	13.8	13.89	13.66	13.72	13.62	13.84	13.51
YIL137C	TMA108	9	89948	92788	C	TAE3|RBF108	Ribosome-associated, nascent chain binding factor; binds N-terminal region of nascent peptides during translation; recognizes target proteins via its putative metallopeptidase peptide-binding pocket	1078	Protein TMA108 OS=Saccharomyces cerevisiae (strain ATCC 204508 / S288c) GN=TMA108 PE=1 SV=1	TM108_YEAST	108 kDa	NA	0.27	-0.13	13.971	0.64333	13.73	13.79	14.36	14.18	14.1	13.8	14.14	13.64	14.04	13.93
YJL061W	NUP82	10	320016	322157	W	linker nucleoporin NUP82|HRB187	Linker nucleoporin component of the nuclear pore complex (NPC); also part of the NPC cytoplasmic filaments; contributes to nucleocytoplasmic transport and NPC biogenesis; forms stable associations with three FG-nucleoporins (Nsp1p, Nup159p, and Nup116p); relocalizes to the cytosol in response to hypoxia	775	Nucleoporin NUP82 OS=Saccharomyces cerevisiae (strain ATCC 204508 / S288c) GN=NUP82 PE=1 SV=2	NUP82_YEAST	82 kDa	NA	0.16	-0.13	13.506	0.51995	13.43	13.17	13.93	13.73	13.64	13.63	13.22	13.39	13.53	13.39
YKL069W	YKL069W	11	307285	307827	W	L-methionine (R)-S-oxide reductase|fRMsr|YKG9	Methionine-R-sulfoxide reductase; reduces the R enantiomer of free Met-SO, in contrast to Ycl033Cp which reduces Met-R-SO in a peptide linkage; has a role in protection against oxidative stress; relative distribution to the nucleus increases upon DNA replication stress	558	Free methionine-R-sulfoxide reductase OS=Saccharomyces cerevisiae (strain ATCC 204508 / S288c) GN=YKL069W PE=1 SV=1	FRMSR_YEAST	20 kDa	NA	0.08	-0.13	14.259	0.374684	14.42	14.43	14.2	14.46	14.15	14.11	14.14	14.22	14.2	14.26
YKL105C	SEG2	11	239185	242583	C		Eisosome component; likely plays only a minor role in eisosome assembly; shown to interact with Seg1p by affinity purification and mass spec; SWAT-GFP and mCherry fusion proteins localize to the cell periphery; similar to <i>A. gossypii</i> SEG gene which is important for stabilizing eisosomes; SEG2 has a paralog, SEG1, that arose from the whole genome duplication	893	Eisosome protein SEG2 OS=Saccharomyces cerevisiae (strain ATCC 204508 / S288c) GN=SEG2 PE=1 SV=1	SEG2_YEAST	126 kDa	NA	0.2	-0.13	12.044	0.571744	11.97	12.06	12.18	12.19	12.13	11.98	12.02	11.85	12.06	12
YKL159C	RCN1	11	153816	154451	C		Protein involved in calcineurin regulation during calcium signaling; has similarity to H. sapiens DSCR1 which is found in the Down Syndrome candidate region	1367	Calcipressin-like protein OS=Saccharomyces cerevisiae (strain ATCC 204508 / S288c) GN=RCN1 PE=1 SV=1	RCN1_YEAST	24 kDa	NA	0.39	-0.13	11.496	0.735688	11.65	11.47	11.62	11.67	11.37	11.39	11.76	11.06	11.36	11.61
YKL210W	UBA1	11	39163	42237	W	E1 ubiquitin-activating protein UBA1	Ubiquitin activating enzyme (E1); involved in ubiquitin-mediated protein degradation and essential for viability; protein abundance increases in response to DNA replication stress	114	Ubiquitin-activating enzyme E1 1 OS=Saccharomyces cerevisiae (strain ATCC 204508 / S288c) GN=UBA1 PE=1 SV=2	UBA1_YEAST	114 kDa	NA	0.001	-0.13	13.657	0.0181119	13.46	13.27	14.22	13.79	13.92	13.74	13.25	13.51	13.85	13.56
YKR001C	VPS1	11	440608	442722	C	dynamin-like GTPase VPS1|VPT26|VPL1|SPO15|LAM1|GRD1	Dynamin-like GTPase required for vacuolar sorting; also involved in actin cytoskeleton organization, endocytosis, late Golgi-retention of some proteins, regulation of peroxisome biogenesis	302	Vacuolar protein sorting-associated protein 1 OS=Saccharomyces cerevisiae (strain ATCC 204508 / S288c) GN=VPS1 PE=1 SV=2	VPS1_YEAST	79 kDa	TRUE	0.02	-0.13	14.07	0.171523	13.9	13.69	14.52	14.25	14.32	14.15	13.76	13.86	14.25	14
YLR032W	RAD5	12	204991	208500	W	DNA helicase RAD5|SNM2|REV2	DNA helicase/Ubiquitin ligase; involved in error-free DNA damage tolerance (DDT), replication fork regression during postreplication repair by template switching, error-prone translesion synthesis; promotes synthesis of free and PCNA-bound polyubiquitin chains by Ubc13p-Mms2p; forms nuclear foci upon DNA replication stress; associates with native telomeres, cooperates with homologous recombinatio…	991	DNA repair protein RAD5 OS=Saccharomyces cerevisiae (strain ATCC 204508 / S288c) GN=RAD5 PE=1 SV=1	RAD5_YEAST	134 kDa	NA	0.24	-0.13	11.673	0.618507	11.56	11.57	11.82	11.76	11.97	11.74	11.29	11.64	11.91	11.47
YLR245C	CDD1	12	626502	626930	C	cytidine deaminase	Cytidine deaminase; catalyzes the modification of cytidine to uridine in vitro but native RNA substrates have not been identified, localizes to both the nucleus and cytoplasm	675	Cytidine deaminase OS=Saccharomyces cerevisiae (strain ATCC 204508 / S288c) GN=CDD1 PE=1 SV=1	CDD_YEAST	16 kDa	NA	0.12	-0.13	13.115	0.456388	13.08	13.14	13.17	13.28	13.21	12.92	13.26	12.91	13.03	13.15
YLR249W	YEF3	12	636780	639914	W	translation elongation factor EF-3|EF-3|eEF3|TEF3	Translation elongation factor 3; contains two ABC cassettes; binds and hydrolyzes ATP; YEF3 has a paralog, HEF3, that arose from the whole genome duplication	2560	Cluster of Elongation factor 3A OS=Saccharomyces cerevisiae (strain ATCC 204508 / S288c) GN=YEF3 PE=1 SV=4 (EF3A_YEAST)	EF3A_YEAST [2]	116 kDa	TRUE	0.96	-0.13	13.422	0.98199	13.2	12.86	14.01	13.61	13.77	13.54	12.92	13.25	13.76	13.3
YML111W	BUL2	13	46942	49704	W	ubiquitin-ubiquitin ligase BUL2	Component of the Rsp5p E3-ubiquitin ligase complex; involved in intracellular amino acid permease sorting, functions in heat shock element mediated gene expression, essential for growth in stress conditions; BUL2 has a paralog, BUL1, that arose from the whole genome duplication	684	Ubiquitin ligase-binding protein BUL2 OS=Saccharomyces cerevisiae (strain ATCC 204508 / S288c) GN=BUL2 PE=1 SV=1	BUL2_YEAST	105 kDa	NA	0.12	-0.13	13.397	0.456388	13.32	13.32	13.69	13.55	13.57	13.09	13.54	13.21	13.32	13.36
YMR016C	SOK2	13	303236	305593	C		Nuclear protein that negatively regulates pseudohyphal differentiation; plays a regulatory role in the cyclic AMP (cAMP)-dependent protein kinase (PKA) signal transduction pathway; relocalizes to the cytosol in response to hypoxia; SOK2 has a paralog, PHD1, that arose from the whole genome duplication	293	Protein SOK2 OS=Saccharomyces cerevisiae (strain ATCC 204508 / S288c) GN=SOK2 PE=1 SV=1	SOK2_YEAST	86 kDa	TRUE	0.018	-0.13	11.932	0.159658	11.96	12.09	12.02	11.99	11.94	11.81	11.97	11.9	11.75	11.89
YMR125W	STO1	13	517539	520446	W	SUT1|CBP80|GCR3|CBC1	Large subunit of the nuclear mRNA cap-binding protein complex; interacts with Npl3p to carry nuclear poly(A)+ mRNA to cytoplasm; also involved in nuclear mRNA degradation and telomere maintenance; orthologous to mammalian CBP80	646	Nuclear cap-binding protein complex subunit 1 OS=Saccharomyces cerevisiae (strain ATCC 204508 / S288c) GN=STO1 PE=1 SV=2	NCBP1_YEAST	100 kDa	NA	0.11	-0.13	13.248	0.438983	13.24	13	13.71	13.47	13.26	13.17	13.09	13.08	13.19	13.27
YMR205C	PFK2	13	671887	674766	C	6-phosphofructokinase subunit beta	Beta subunit of heterooctameric phosphofructokinase; involved in glycolysis; indispensable for anaerobic growth; activated by fructose-2,6-bisphosphate and AMP; mutation inhibits glucose induction of cell cycle-related genes	117	ATP-dependent 6-phosphofructokinase subunit beta OS=Saccharomyces cerevisiae (strain ATCC 204508 / S288c) GN=PFK2 PE=1 SV=4	PFKA2_YEAST	105 kDa	TRUE	0.001	-0.13	13.817	0.0181119	13.64	13.46	14.25	13.99	14.06	13.81	13.58	13.7	14.02	13.66
YNL281W	HCH1	14	108467	108928	W		Heat shock protein regulator; binds to Hsp90p and may stimulate ATPase activity; originally identified as a high-copy number suppressor of a HSP90 loss-of-function mutation; role in regulating Hsp90 inhibitor drug sensitivity; GFP-fusion protein localizes to the cytoplasm and nucleus; protein abundance increases in response to DNA replication stress	2211	Hsp90 co-chaperone HCH1 OS=Saccharomyces cerevisiae (strain ATCC 204508 / S288c) GN=HCH1 PE=1 SV=1	HCH1_YEAST	17 kDa	NA	0.8	-0.13	14.116	0.938406	14.13	14.1	14.33	14.09	14.04	13.65	14.92	13.99	14.24	13.67
YNR047W	FPK1	14	708523	711204	W	serine/threonine protein kinase FPK1	Ser/Thr protein kinase; phosphorylates several aminophospholipid translocase family members, regulating phospholipid translocation and membrane asymmetry; phosphorylates and inhibits upstream inhibitory kinase, Ypk1p; localizes to the cytoplasm, early endosome/TGN compartments and thplasma membrane; localizes to the shmoo tip where it has a redundant role in the cellular response to mating pherom…	1551	Flippase kinase 1 OS=Saccharomyces cerevisiae (strain ATCC 204508 / S288c) GN=FPK1 PE=1 SV=1	FPK1_YEAST	101 kDa	TRUE	0.48	-0.13	12.07	0.8	11.85	11.77	12.41	12.24	12.28	12.5	11.77	11.98	12.03	11.87
YOR133W	EFT1	15	575098	577626	W	elongation factor 2	Elongation factor 2 (EF-2), also encoded by EFT2; catalyzes ribosomal translocation during protein synthesis; contains diphthamide, the unique posttranslationally modified histidine residue specifically ADP-ribosylated by diphtheria toxin; EFT1 has a paralog, EFT2, that arose from the whole genome duplication	109	Elongation factor 2 OS=Saccharomyces cerevisiae (strain ATCC 204508 / S288c) GN=EFT1 PE=1 SV=1	EF2_YEAST	93 kDa	NA	0.001	-0.13	13.467	0.0181119	13.23	13.06	13.96	13.65	13.76	13.69	12.98	13.29	13.72	13.33
YOR286W	RDL2	15	850280	850729	W	thiosulfate sulfurtransferase RDL2|AIM42|FMP31	Protein with rhodanese activity; contains a rhodanese-like domain similar to Rdl1p, Uba4p, Tum1p, and Ych1p; overexpression causes a cell cycle delay; null mutant displays elevated frequency of mitochondrial genome loss	1121	Thiosulfate sulfurtransferase RDL2, mitochondrial OS=Saccharomyces cerevisiae (strain ATCC 204508 / S288c) GN=RDL2 PE=1 SV=1	RDL2_YEAST	17 kDa	NA	0.28	-0.13	15.338	0.649821	15.39	15.41	15.4	15.41	15.24	15.09	15.79	15.25	15.29	15.11
YPL038W	MET31	16	480535	481068	W		Zinc-finger DNA-binding transcription factor; targets strong transcriptional activator Met4p to promoters of sulfur metabolic genes; involved in transcriptional regulation of the methionine biosynthetic genes; feedforward loop controlling expression of MET32 and the lack of such a loop for MET31 may account for the differential actions of Met31p and Met32p; MET31 has a paralog, MET32, that arose …	1146	Transcriptional regulator MET31 OS=Saccharomyces cerevisiae (strain ATCC 204508 / S288c) GN=MET31 PE=1 SV=1	MET31_YEAST	20 kDa	NA	0.3	-0.13	13.463	0.669251	13.72	13.65	13.25	13.45	13.54	13.3	13.61	13.42	13.23	13.46
YAL020C	ATS1	1	113614	114615	C	KTI13|FUN28	Protein required for modification of wobble nucleosides in tRNA; acts with Elongator complex, Kti11p, and Kti12p; has a potential role in regulatory interactions between microtubules and the cell cycle; forms a stable heterodimer with Kti11p	947	Protein ATS1 OS=Saccharomyces cerevisiae (strain ATCC 204508 / S288c) GN=ATS1 PE=1 SV=2	ATS1_YEAST	36 kDa	NA	0.22	-0.12	13.806	0.594161	13.88	13.83	13.83	13.79	14.08	13.81	13.41	13.78	13.82	13.83
YBR017C	KAP104	2	270947	273703	C		Transportin or cytosolic karyopherin beta 2; functions in the rg-nuclear localization signal-mediated nuclear import/reimport of mRNA-binding proteins Nab2p and Hrp1p; regulates asymmetric protein synthesis in daughter cells during mitosis	934	Importin subunit beta-2 OS=Saccharomyces cerevisiae (strain ATCC 204508 / S288c) GN=KAP104 PE=1 SV=1	IMB2_YEAST	104 kDa	NA	0.21	-0.12	13.293	0.586731	13.19	13.05	13.83	13.36	13.44	13.32	12.9	13.16	13.46	13.22
YBR086C	IST2	2	420201	423041	C		Cortical ER protein involved in ER-plasma membrane tethering; one of 6 proteins (Ist2p, Scs2p, Scs22p, Tcb1p, Tcb2p, Tcb3p) that connect ER to the plasma membrane (PM) and regulate PM phosphatidylinositol-4-phosphate (PI4P) levels by controlling access of Sac1p phosphatase to its substrate PI4P in the PM; localizes to the mother cell in small-budded cells and to the bud in medium- and large-budde…	380	Increased sodium tolerance protein 2 OS=Saccharomyces cerevisiae (strain ATCC 204508 / S288c) GN=IST2 PE=1 SV=2	IST2_YEAST	106 kDa	NA	0.034	-0.12	12.839	0.230524	12.9	12.55	13.28	12.93	12.89	12.78	12.67	12.6	12.98	12.81
YBR094W	PBY1	2	432036	434297	W	putative tubulin tyrosine ligase	Putative tubulin tyrosine ligase associated with P-bodies; may have a role in mRNA metabolism; yeast knockout collection strain identified as a pby1 null mutant is actually wild-type for PBY1 and deleted for mms4	2369	Probable tubulin--tyrosine ligase PBY1 OS=Saccharomyces cerevisiae (strain ATCC 204508 / S288c) GN=PBY1 PE=1 SV=2	TTL_YEAST	86 kDa	NA	0.87	-0.12	12.968	0.957629	12.83	12.71	13.16	13.04	13.02	12.89	12.85	13.34	12.91	12.93
YCR004C	YCP4	3	119575	120318	C	flavodoxin-like fold family protein	Protein of unknown function; has sequence and structural similarity to flavodoxins; predicted to be palmitoylated; the authentic, non-tagged protein is detected in highly purified mitochondria in high-throughput studies	103	Flavoprotein-like protein YCP4 OS=Saccharomyces cerevisiae (strain ATCC 204508 / S288c) GN=YCP4 PE=1 SV=1	YCP4_YEAST	26 kDa	TRUE	0.00083	-0.12	13.853	0.0181119	13.93	13.96	13.92	13.95	13.83	13.85	13.63	13.83	13.85	13.78
YDL166C	FAP7	4	163449	164042	C	nucleoside-triphosphatase	Essential NTPase required for small ribosome subunit synthesis; mediates processing of the 20S pre-rRNA at site D in the cytoplasm but associates only transiently with 43S preribosomes via Rps14p; complex with Rps14 is conserved between humans, yeast, and arches; may be the endonuclease for site D; depletion leads to accumulation of pre-40S ribosomes in 80S-like ribosomes; human TAF9 functionally…	158	Adenylate kinase isoenzyme 6 homolog FAP7 OS=Saccharomyces cerevisiae (strain ATCC 204508 / S288c) GN=FAP7 PE=1 SV=1	KAD6_YEAST	23 kDa	NA	0.002	-0.12	13.369	0.0329936	13.47	13.61	13.34	13.41	13.36	13.26	13.19	13.31	13.38	13.36
YDR224C	HTB1	4	914317	914712	C	histone H2B|SPT12	Histone H2B; core histone protein required for chromatin assembly and chromosome function; nearly identical to HTB2; Rad6p-Bre1p-Lge1p mediated ubiquitination regulates reassembly after DNA replication, transcriptional activation, meiotic DSB formation and H3 methylation	2465	Cluster of Histone H2B.1 OS=Saccharomyces cerevisiae (strain ATCC 204508 / S288c) GN=HTB1 PE=1 SV=2 (H2B1_YEAST)	H2B1_YEAST [2]	14 kDa	TRUE	0.92	-0.12	13.919	0.973366	13.96	14.08	13.88	13.96	13.83	13.54	14.37	13.9	13.87	13.8
YEL013W	VAC8	5	128825	130561	W	protein anchor VAC8|YEB3	Phosphorylated and palmitoylated vacuolar membrane protein; interacts with Atg13p, required for the cytoplasm-to-vacuole targeting (Cvt) pathway; interacts with Nvj1p to form nucleus-vacuole junctions	374	Vacuolar protein 8 OS=Saccharomyces cerevisiae (strain ATCC 204508 / S288c) GN=VAC8 PE=1 SV=3	VAC8_YEAST	63 kDa	NA	0.033	-0.12	13.735	0.229758	13.6	13.43	14.35	13.88	13.86	13.71	13.38	13.62	13.88	13.64
YEL043W	YEL043W	5	70478	73348	W		Predicted cytoskeleton protein involved in intracellular signaling; based on quantitative analysis of protein-protein interaction maps; may interact with ribosomes, based on co-purification studies; contains fibronectin type III domain fold	1524	Uncharacterized protein YEL043W OS=Saccharomyces cerevisiae (strain ATCC 204508 / S288c) GN=YEL043W PE=1 SV=1	YEF3_YEAST	106 kDa	NA	0.47	-0.12	10.668	0.794582	10.72	10.16	11.6	11.23	10.24	10.41	10.96	10.73	10.22	10.41
YEL060C	PRB1	5	40046	41953	C	proteinase B|CVT1	Vacuolar proteinase B (yscB) with H3 N-terminal endopeptidase activity; serine protease of the subtilisin family; involved in protein degradation in the vacuole and required for full protein degradation during sporulation; activity inhibited by Pbi2p; protein abundance increases in response to DNA replication stress; PRB1 has a paralog, YSP3, that arose from the whole genome duplication	48	Cerevisin OS=Saccharomyces cerevisiae (strain ATCC 204508 / S288c) GN=PRB1 PE=1 SV=1	PRTB_YEAST	70 kDa	NA	0.0001	-0.12	14.39	0.00438983	14.54	14.6	14.37	14.43	14.31	14.27	14.53	14.33	14.25	14.27
YER164W	CHD1	5	505392	509798	W	chromatin-remodeling ATPase CHD1	Chromatin remodeler that regulates various aspects of transcription; acts in in conjunction with Isw1b to regulate chromatin structure and maintain chromatin integrity during transcription elongation by RNAP II by preventing trans-histone exchange over coding regions; contains a chromo domain, a helicase domain and a DNA-binding domain; component of both the SAGA and SLIK complexes	251	Chromo domain-containing protein 1 OS=Saccharomyces cerevisiae (strain ATCC 204508 / S288c) GN=CHD1 PE=1 SV=1	CHD1_YEAST	168 kDa	TRUE	0.011	-0.12	12.984	0.113056	12.88	12.77	13.34	13.05	13.18	13.02	12.85	12.88	13.03	12.84
YGL187C	COX4	7	149704	150171	C	cytochrome c oxidase subunit IV	Subunit IV of cytochrome c oxidase; the terminal member of the mitochondrial inner membrane electron transport chain; precursor N-terminal 25 residues are cleaved during mitochondrial import; phosphorylated; spermidine enhances translation	724	Cytochrome c oxidase subunit 4, mitochondrial OS=Saccharomyces cerevisiae (strain ATCC 204508 / S288c) GN=COX4 PE=1 SV=1	COX4_YEAST	17 kDa	TRUE	0.14	-0.12	12.755	0.488679	12.95	12.94	12.82	12.71	12.64	12.43	13.11	12.72	12.67	12.56
YGR086C	PIL1	7	649598	650617	C	lipid-binding protein PIL1	Eisosome core component; eisosomes are large immobile cell cortex structures associated with endocytosis; detected in phosphorylated state in mitochondria; phosphorylated on Thr233 upon Pkc1p hyperactivation in a Slt2p MAPK-dependent fashion; null mutant shows activation of Pkc1p/Ypk1p stress resistance pathways; member of BAR domain family; protein increases in abundance and relocalizes from pla…	116	Sphingolipid long chain base-responsive protein PIL1 OS=Saccharomyces cerevisiae (strain ATCC 204508 / S288c) GN=PIL1 PE=1 SV=1	PIL1_YEAST	38 kDa	TRUE	0.001	-0.12	13.53	0.0181119	13.67	13.8	13.36	13.64	13.45	13.41	13.64	13.47	13.39	13.47
YHR041C	SRB2	8	189131	189864	C	MED20|HRS2	Subunit of the RNA polymerase II mediator complex; associates with core polymerase subunits to form the RNA polymerase II holoenzyme; general transcription factor involved in telomere maintenance	1213	Mediator of RNA polymerase II transcription subunit 20 OS=Saccharomyces cerevisiae (strain ATCC 204508 / S288c) GN=SRB2 PE=1 SV=1	MED20_YEAST	23 kDa	NA	0.32	-0.12	14.267	0.685525	14.38	14.35	14.27	14.38	14.19	14	14.64	14.2	14.13	14.13
YHR047C	AAP1	8	198740	201310	C	arginine/alanine aminopeptidase|AAP1'	Arginine/alanine amino peptidase; overproduction stimulates glycogen accumulation; AAP1 has a paralog, APE2, that arose from the whole genome duplication	1175	Alanine/arginine aminopeptidase OS=Saccharomyces cerevisiae (strain ATCC 204508 / S288c) GN=AAP1 PE=1 SV=2	AAP1_YEAST	98 kDa	TRUE	0.31	-0.12	13.723	0.678698	13.58	13.4	14.19	13.86	13.95	13.74	13.58	13.42	13.9	13.61
YIL109C	SEC24	9	157385	160165	C	COPII subunit SEC24|ANU1	Component of the Sec23p-Sec24p heterodimer of the COPII vesicle coat; required for cargo selection during vesicle formation in ER to Golgi transport; homologous to Sfb3p; SEC24 has a paralog, SFB2, that arose from the whole genome duplication	898	Cluster of Protein transport protein SEC24 OS=Saccharomyces cerevisiae (strain ATCC 204508 / S288c) GN=SEC24 PE=1 SV=1 (SEC24_YEAST)	SEC24_YEAST [2]	104 kDa	TRUE	0.2	-0.12	12.772	0.571744	12.54	12.36	13.17	13.03	13.02	12.65	12.64	12.64	12.98	12.69
YJR109C	CPA2	10	629585	632941	C	carbamoyl-phosphate synthase (glutamine-hydrolyzing) CPA2	Large subunit of carbamoyl phosphate synthetase; carbamoyl phosphate synthetase catalyzes a step in the synthesis of citrulline, an arginine precursor	290	Carbamoyl-phosphate synthase arginine-specific large chain OS=Saccharomyces cerevisiae (strain ATCC 204508 / S288c) GN=CPA2 PE=1 SV=1	CARB_YEAST	124 kDa	TRUE	0.018	-0.12	13.454	0.159658	13.18	13.04	14.21	13.58	13.76	13.56	12.99	13.33	13.68	13.21
YJR117W	STE24	10	642007	643368	W	zinc metalloprotease|PIO2|AFC1	Highly conserved zinc metalloprotease; functions in two steps of a-factor maturation, C-terminal CAAX proteolysis and the first step of N-terminal proteolytic processing; cleaves both isoprenylated and non-prenylated oligopeptides; contains multiple transmembrane spans; human homolog ZMPSTE24 implicated in mandibuloacral dysplasia (MAD), and can complement yeast null mutant	2228	CAAX prenyl protease 1 OS=Saccharomyces cerevisiae (strain ATCC 204508 / S288c) GN=STE24 PE=1 SV=1	STE24_YEAST	52 kDa	NA	0.8	-0.12	13.845	0.938406	13.76	13.56	14.3	13.87	13.94	13.61	14.24	13.64	13.93	13.6
YLR056W	ERG3	12	253861	254958	W	C-5 sterol desaturase|PSO6|SYR1	C-5 sterol desaturase; glycoprotein that catalyzes the introduction of a C-5(6) double bond into episterol, a precursor in ergosterol biosynthesis; transcriptionally down-regulated when ergosterol is in excess; mutants are viable, but cannot grow on non-fermentable carbon sources; substrate of HRD ubiquitin ligase; mutation is functionally complemented by human SC5D	1657	Delta(7)-sterol 5(6)-desaturase OS=Saccharomyces cerevisiae (strain ATCC 204508 / S288c) GN=ERG3 PE=1 SV=1	ERG3_YEAST	43 kDa	NA	0.54	-0.12	13.655	0.841516	13.47	13.19	14.2	13.75	13.86	13.63	13.49	13.43	13.98	13.55
YLR129W	DIP2	12	399657	402488	W	snoRNA-binding rRNA-processing protein DIP2|UTP12	Nucleolar protein; specifically associated with the U3 snoRNA, part of the large ribonucleoprotein complex known as the small subunit (SSU) processome, required for 18S rRNA biogenesis, part of the active pre-rRNA processing complex	1085	U3 small nucleolar RNA-associated protein 12 OS=Saccharomyces cerevisiae (strain ATCC 204508 / S288c) GN=DIP2 PE=1 SV=1	UTP12_YEAST	106 kDa	NA	0.27	-0.12	12.835	0.64333	12.67	12.59	13.21	12.93	13.1	12.77	12.62	12.63	13.12	12.71
YLR253W	MCP2	12	642627	644336	W	MRX13	Mitochondrial protein of unknown function involved in lipid homeostasis; associates with mitochondrial ribosome; integral membrane protein that localizes to the mitochondrial inner membrane; involved in mitochondrial morphology; non-essential gene which interacts genetically with MDM10, and other members of the ERMES complex; transcription is periodic during the metabolic cycle; homologous to hum…	1388	ABC1 family protein MCP2 OS=Saccharomyces cerevisiae (strain ATCC 204508 / S288c) GN=MCP2 PE=1 SV=1	MCP2_YEAST	66 kDa	NA	0.4	-0.12	12.716	0.743185	12.66	12.26	13.41	12.83	12.79	12.92	12.32	12.57	12.99	12.41
YLR438C-A	LSM3	12	1013909	1014178	C	U4/U6-U5 snRNP complex subunit LSM3|USS2|SMX4	Lsm (Like Sm) protein; part of heteroheptameric complexes (Lsm2p-7p and either Lsm1p or 8p): cytoplasmic Lsm1p complex involved in mRNA decay; nuclear Lsm8p complex part of U6 snRNP and possibly involved in processing tRNA, snoRNA, and rRNA; protein increases in abundance and relocalizes from nucleus to cytoplasmic foci upon DNA replication stress	2159	U6 snRNA-associated Sm-like protein LSm3 OS=Saccharomyces cerevisiae (strain ATCC 204508 / S288c) GN=LSM3 PE=1 SV=1	LSM3_YEAST	10 kDa	NA	0.77	-0.12	12.711	0.925	12.98	12.9	12.53	12.74	12.69	12.6	12.57	12.51	12.71	12.88
YML086C	ALO1	13	95791	97371	C	D-arabinono-1,4-lactone oxidase	D-Arabinono-1,4-lactone oxidase; catalyzes the final step in biosynthesis of dehydro-D-arabinono-1,4-lactone, which is protective against oxidative stress	352	D-arabinono-1,4-lactone oxidase OS=Saccharomyces cerevisiae (strain ATCC 204508 / S288c) GN=ALO1 PE=1 SV=1	ALO_YEAST	59 kDa	NA	0.029	-0.12	12.45	0.215833	12.3	12.13	12.83	12.7	12.81	12.66	11.73	12.16	12.7	12.48
YMR031C	EIS1	13	332212	334743	C		Component of the eisosome required for proper eisosome assembly; similar to Uso1p; authentic, non-tagged protein is detected in a phosphorylated state in highly purified mitochondria in high-throughput studies; protein increases in abundance and relocalizes from plasma membrane to cytoplasm upon DNA replication stress; EIS1 has a paralog, YKL050C, that arose from the whole genome duplication	28	Eisosome protein 1 OS=Saccharomyces cerevisiae (strain ATCC 204508 / S288c) GN=EIS1 PE=1 SV=1	EIS1_YEAST	93 kDa	NA	0.0001	-0.12	13.779	0.00438983	13.9	13.99	13.77	13.8	13.72	13.59	13.95	13.73	13.65	13.69
YMR080C	NAM7	13	426712	429627	C	SUT2|ATP-dependent RNA helicase NAM7|SUP113|UPF1|MOF4|IFS2	ATP-dependent RNA helicase of the SFI superfamily; involved in nonsense mediated mRNA decay; required for efficient translation termination at nonsense codons and targeting of NMD substrates to P-bodies; binds to the small ribosomal subunit via an interaction with Rps26; forms cytoplasmic foci upon DNA replication stress	319	ATP-dependent helicase NAM7 OS=Saccharomyces cerevisiae (strain ATCC 204508 / S288c) GN=NAM7 PE=1 SV=1	NAM7_YEAST	109 kDa	NA	0.022	-0.12	12.656	0.179182	12.57	12.49	12.86	12.89	12.75	12.44	12.65	12.65	12.7	12.56
YMR183C	SSO2	13	626921	627808	C	syntaxin	Plasma membrane t-SNARE; involved in fusion of secretory vesicles at the plasma membrane; syntaxin homolog that is functionally redundant with Sso1p; SSO2 has a paralog, SSO1, that arose from the whole genome duplication	831	Protein SSO2 OS=Saccharomyces cerevisiae (strain ATCC 204508 / S288c) GN=SSO2 PE=1 SV=2	SSO2_YEAST	34 kDa	TRUE	0.17	-0.12	12.102	0.530482	12.13	12.04	12.55	12.13	12.01	11.86	12.34	11.95	12.14	11.87
YMR237W	BCH1	13	743749	745923	W	exomer complex subunit	Member of the ChAPs family (Chs5p-Arf1p-binding proteins); members include Bch1p, Bch2p, Bud7p, and Chs6p; ChAPs family proteins form the exomer complex with Chs5p to mediate export of specific cargo proteins from the Golgi to the plasma membrane; interacts selectively with the activated, GTP-bound form of Arf1p; may interact with ribosomes; protein abundance increases and forms cytoplasmic foci …	710	Protein BCH1 OS=Saccharomyces cerevisiae (strain ATCC 204508 / S288c) GN=BCH1 PE=1 SV=1	BCH1_YEAST	82 kDa	NA	0.13	-0.12	12.632	0.470909	12.6	12.33	13.13	12.71	12.81	12.61	12.35	12.48	12.72	12.58
YOR116C	RPO31	15	539763	544145	C	DNA-directed RNA polymerase III core subunit RPO31|C160|RPC160|RPC1	RNA polymerase III largest subunit C160; part of core enzyme; similar to bacterial beta-prime subunit and to RPA190 and RPO21	426	DNA-directed RNA polymerase III subunit RPC1 OS=Saccharomyces cerevisiae (strain ATCC 204508 / S288c) GN=RPO31 PE=1 SV=1	RPC1_YEAST	162 kDa	TRUE	0.043	-0.12	12.643	0.262665	12.59	12.53	12.78	12.83	12.82	12.59	12.58	12.48	12.62	12.61
YPL249C	GYP5	16	76669	79353	C		GTPase-activating protein (GAP) for yeast Rab family members; involved in ER to Golgi trafficking; exhibits GAP activity toward Ypt1p that is stimulated by Gyl1p, also acts on Sec4p; interacts with Gyl1p, Rvs161p and Rvs167p; involved in recruiting Rvs167p to the bud tip during polarized growth; relocalizes from bud neck to cytoplasm upon DNA replication stress; GYP5 has a paralog, GYL1, that aro…	712	GTPase-activating protein GYP5 OS=Saccharomyces cerevisiae (strain ATCC 204508 / S288c) GN=GYP5 PE=1 SV=1	GYP5_YEAST	102 kDa	NA	0.13	-0.12	13.446	0.470909	13.38	13.29	13.81	13.56	13.5	13.39	13.49	13.25	13.5	13.29
YAL025C	MAK16	1	100225	101145	C	ribosome biosynthesis protein MAK16	Essential nuclear protein; constituent of 66S pre-ribosomal particles; required for maturation of 25S and 5.8S rRNAs; required for maintenance of M1 satellite double-stranded RNA of the L-A virus	154	Protein MAK16 OS=Saccharomyces cerevisiae (strain ATCC 204508 / S288c) GN=MAK16 PE=1 SV=2	MAK16_YEAST	36 kDa	TRUE	0.002	-0.11	14.662	0.0329936	14.84	14.89	14.56	14.72	14.56	14.54	14.66	14.67	14.59	14.59
YAR042W	SWH1	1	192619	196185	W	oxysterol-binding protein related protein SWH1|OSH1|YAR044W	Protein similar to mammalian oxysterol-binding protein; contains ankyrin repeats and FFAT motif; interacts with ER anchor Scs2p at the nucleus-vacuole junction; regulated by sterol binding; SWH1 has a paralog, OSH2, that arose from the whole genome duplication	1066	Oxysterol-binding protein homolog 1 OS=Saccharomyces cerevisiae (strain ATCC 204508 / S288c) GN=SWH1 PE=1 SV=4	OSH1_YEAST	135 kDa	NA	0.26	-0.11	12.634	0.635283	12.47	12.45	12.86	12.83	12.86	12.51	12.77	12.64	12.63	12.32
YBR092C	PHO3	2	427698	429101	C	acid phosphatase PHO3|phoC	Constitutively expressed acid phosphatase similar to Pho5p; brought to the cell surface by transport vesicles; hydrolyzes thiamin phosphates in the periplasmic space, increasing cellular thiamin uptake; expression is repressed by thiamin	2172	Cluster of Constitutive acid phosphatase OS=Saccharomyces cerevisiae (strain ATCC 204508 / S288c) GN=PHO3 PE=1 SV=2 (PPA3_YEAST)	PPA3_YEAST [4]	53 kDa	TRUE	0.77	-0.11	13.537	0.925	13.62	13.62	13.47	13.85	13.41	13.32	13.87	13.5	13.46	13.25
YDR060W	MAK21	4	570649	573726	W	RNA-binding ribosome biosynthesis protein MAK21|NOC1	Constituent of 66S pre-ribosomal particles; required for large (60S) ribosomal subunit biogenesis; acts as part of a Mak21p-Noc2p-Rrp5p module that associates with nascent pre-rRNA during transcription and has a role in bigenesis of the large ribosomal subunit; involved in nuclear export of pre-ribosomes; required for maintenance of dsRNA virus; homolog of human CAATT-binding protein	722	Ribosome biogenesis protein MAK21 OS=Saccharomyces cerevisiae (strain ATCC 204508 / S288c) GN=MAK21 PE=1 SV=1	MAK21_YEAST	117 kDa	NA	0.14	-0.11	14.381	0.488679	14.27	14.07	14.75	14.67	14.5	14.31	14.23	14.18	14.5	14.33
YDR398W	UTP5	4	1267471	1269402	W		Subunit of U3-containing Small Subunit (SSU) processome complex; involved in production of 18S rRNA and assembly of small ribosomal subunit	988	U3 small nucleolar RNA-associated protein 5 OS=Saccharomyces cerevisiae (strain ATCC 204508 / S288c) GN=UTP5 PE=1 SV=1	UTP5_YEAST	72 kDa	NA	0.23	-0.11	15.265	0.607237	15.29	15.26	15.34	15.32	15.42	15.28	14.99	15.17	15.31	15.27
YEL002C	WBP1	5	148722	150014	C	dolichyl-diphosphooligosaccharide-protein glycotransferase	Beta subunit of the oligosaccharyl transferase glycoprotein complex; required for N-linked glycosylation of proteins in the endoplasmic reticulum; human homolog DDOST can complement yeast growth defect during down-regulation of yeast gene	1073	Dolichyl-diphosphooligosaccharide--protein glycosyltransferase subunit WBP1 OS=Saccharomyces cerevisiae (strain ATCC 204508 / S288c) GN=WBP1 PE=1 SV=1	OSTB_YEAST	49 kDa	NA	0.27	-0.11	13.894	0.64333	13.77	13.59	14.5	14	13.98	13.78	13.71	13.7	14.11	13.8
YFL007W	BLM10	6	123479	129910	W	YFL006W	Proteasome activator; binds the core proteasome (CP) and stimulates proteasome-mediated protein degradation by inducing gate opening; required for sequestering CP into proteasome storage granule (PSG) during quiescent phase and for nuclear import of CP in proliferating cells; required for resistance to bleomycin, may be involved in protecting against oxidative damage; similar to mammalian PA200	907	Proteasome activator BLM10 OS=Saccharomyces cerevisiae (strain ATCC 204508 / S288c) GN=BLM10 PE=1 SV=2	BLM10_YEAST	246 kDa	NA	0.2	-0.11	12.7	0.571744	12.78	12.42	13.29	12.64	12.82	12.63	12.57	12.51	12.71	12.63
YGR083C	GCD2	7	644860	646815	C	translation initiation factor eIF2B subunit delta|GCD12	Delta subunit of the translation initiation factor eIF2B; the guanine-nucleotide exchange factor for eIF2; activity subsequently regulated by phosphorylated eIF2; first identified as a negative regulator of GCN4 expression	727	Translation initiation factor eIF-2B subunit delta OS=Saccharomyces cerevisiae (strain ATCC 204508 / S288c) GN=GCD2 PE=1 SV=1	EI2BD_YEAST	71 kDa	NA	0.14	-0.11	12.55	0.488679	12.37	12.33	12.99	12.69	12.69	12.6	12.33	12.46	12.59	12.45
YGR200C	ELP2	7	899904	902270	C	Elongator subunit ELP2|KTI3|TOT2	Subunit of Elongator complex; binds to microtubules via conserved alkaline residues; has two seven-bladed WD40 &	1684	Elongator complex protein 2 OS=Saccharomyces cerevisiae (strain ATCC 204508 / S288c) GN=ELP2 PE=1 SV=1	ELP2_YEAST	89 kDa	NA	0.55	-0.11	12.663	0.84994	12.29	12.19	13.29	12.91	12.9	12.56	12.49	12.58	12.93	12.49
YHR110W	ERP5	8	332282	332920	W		Protein with similarity to Emp24p and Erv25p; member of the p24 family involved in ER to Golgi transport	1216	Protein ERP5 OS=Saccharomyces cerevisiae (strain ATCC 204508 / S288c) GN=ERP5 PE=1 SV=1	ERP5_YEAST	24 kDa	NA	0.32	-0.11	11.085	0.685525	11.21	11.49	10.95	11.16	11.02	11.25	10.43	11.09	11.07	11.18
YIL078W	THS1	9	212499	214703	W	threonine--tRNA ligase THS1	Threonyl-tRNA synthetase; essential cytoplasmic protein; human homolog TARS can complement yeast null mutant	306	Threonine--tRNA ligase, cytoplasmic OS=Saccharomyces cerevisiae (strain ATCC 204508 / S288c) GN=THS1 PE=1 SV=2	SYTC_YEAST	85 kDa	NA	0.021	-0.11	14.58	0.174888	14.35	14.14	15.07	14.74	14.86	14.89	14.07	14.41	14.79	14.48
YJL012C	VTC4	10	411234	413399	C	YJL012C-A|PHM3	Vacuolar membrane polyphosphate polymerase; subunit of the vacuolar transporter chaperone (VTC) complex involved in synthesis and transfer of polyP to the vacuole; regulates membrane trafficking; role in non-autophagic vacuolar fusion; protein abundance increases in response to DNA replication stress	339	Vacuolar transporter chaperone 4 OS=Saccharomyces cerevisiae (strain ATCC 204508 / S288c) GN=VTC4 PE=1 SV=2	VTC4_YEAST	83 kDa	NA	0.026	-0.11	14.124	0.199231	14.11	13.82	14.52	14.2	14.29	14.04	13.93	13.97	14.27	14.09
YJR024C	MDE1	10	470230	470964	C	methylthioribulose 1-phosphate dehydratase MDE1	5'-methylthioribulose-1-phosphate dehydratase; acts in the methionine salvage pathway; potential Smt3p sumoylation substrate; expression downregulated by caspofungin and deletion mutant is caspofungin resistant	405	Methylthioribulose-1-phosphate dehydratase OS=Saccharomyces cerevisiae (strain ATCC 204508 / S288c) GN=MDE1 PE=1 SV=1	MTNB_YEAST	27 kDa	NA	0.038	-0.11	13.686	0.245436	13.78	13.84	13.56	13.79	13.69	13.63	13.77	13.57	13.62	13.61
YKL006C-A	SFT1	11	430198	430632	C		Intra-Golgi v-SNARE; required for transport of proteins between an early and a later Golgi compartment	1438	Protein transport protein SFT1 OS=Saccharomyces cerevisiae (strain ATCC 204508 / S288c) GN=SFT1 PE=1 SV=1	SFT1_YEAST	11 kDa	NA	0.42	-0.11	12.221	0.758577	11.99	11.78	12.88	12.44	12.36	12.18	11.97	12.15	12.54	11.92
YKL104C	GFA1	11	243220	245373	C	glutamine--fructose-6-phosphate transaminase (isomerizing) GFA1	Glutamine-fructose-6-phosphate amidotransferase; catalyzes the formation of glucosamine-6-P and glutamate from fructose-6-P and glutamine in the first step of chitin biosynthesis; GFA1 has a paralogous region, comprising ORFs YMR084W-YMR085W, that arose from the whole genome duplication	1013	Glutamine--fructose-6-phosphate aminotransferase [isomerizing] OS=Saccharomyces cerevisiae (strain ATCC 204508 / S288c) GN=GFA1 PE=1 SV=4	GFA1_YEAST	80 kDa	NA	0.24	-0.11	13.035	0.618507	12.88	12.44	13.49	13.28	13.25	13.18	12.73	12.83	13.26	13.01
YLR038C	COX12	12	224921	225172	C	cytochrome c oxidase subunit VIb	Subunit VIb of cytochrome c oxidase; cytochrome c oxidase is also known as respiratory Complex IV and is the terminal member of the mitochondrial inner membrane electron transport chain; required for assembly of cytochrome c oxidase but not required for activity after assembly; phosphorylated; easily released from the intermembrane space, suggesting a loose association with Complex IV	1341	Cytochrome c oxidase subunit 6B OS=Saccharomyces cerevisiae (strain ATCC 204508 / S288c) GN=COX12 PE=1 SV=2	COX12_YEAST	10 kDa	NA	0.38	-0.11	13.236	0.729577	13.43	13.46	13.33	13.19	13	12.98	13.41	13.23	13.38	12.95
YLR167W	RPS31	12	498947	499405	W	eS31|ubiquitin-ribosomal 40S subunit protein S31 fusion protein|S31e|UB13|YS24|S37|S31|UBI3|RPS37	Fusion protein cleaved to yield ribosomal protein S31 and ubiquitin; ubiquitin may facilitate assembly of the ribosomal protein into ribosomes; interacts genetically with translation factor eIF2B; homologous to mammalian ribosomal protein S27A, no bacterial homolog	2184	Cluster of Ubiquitin-40S ribosomal protein S31 OS=Saccharomyces cerevisiae (strain ATCC 204508 / S288c) GN=RPS31 PE=1 SV=3 (RS27A_YEAST)	RS27A_YEAST [3]	17 kDa	TRUE	0.78	-0.11	13.032	0.930968	13.19	13.21	13	13.09	12.98	12.83	13.06	13.02	13.06	12.88
YLR262C	YPT6	12	668244	668891	C	Rab family GTPase YPT6	Rab family GTPase; required for endosome-to-Golgii, intra-Golgi retrograde, and retrograde Golgi-to-ER transport; temporarily at the Golgi, dissociating into the cytosol on arrival of the late Golgi GTPase Ypt32p; Golgi-localized form is GTP bound, while cytosolic form is GDP-bound; required for delivery of Atg9p to the phagophore assembly site during autophagy under heat stress, with Ypt6p for s…	1211	GTP-binding protein YPT6 OS=Saccharomyces cerevisiae (strain ATCC 204508 / S288c) GN=YPT6 PE=1 SV=1	YPT6_YEAST	24 kDa	NA	0.32	-0.11	13.242	0.685525	13.02	12.94	13.7	13.38	13.44	13.41	12.81	13.2	13.33	13.19
YLR306W	UBC12	12	744151	744851	W	NEDD8-conjugating protein UBC12	Enzyme that mediates the conjugation of Rub1p; a ubiquitin-like protein, to other proteins; related to E2 ubiquitin-conjugating enzymes	1320	NEDD8-conjugating enzyme UBC12 OS=Saccharomyces cerevisiae (strain ATCC 204508 / S288c) GN=UBC12 PE=1 SV=1	UBC12_YEAST	21 kDa	NA	0.37	-0.11	10.768	0.725985	11.03	10.66	10.84	11.1	10.55	10.36	11.23	10.91	10.62	10.38
YLR384C	IKI3	12	888851	892900	C	Elongator subunit IKI3|KTI7|TOT1|ELP1	Subunit of Elongator complex; Elongator is required for modification of wobble nucleosides in tRNA; maintains structural integrity of Elongator; homolog of human IKAP, mutations in which cause familial dysautonomia (FD)	627	Elongator complex protein 1 OS=Saccharomyces cerevisiae (strain ATCC 204508 / S288c) GN=IKI3 PE=1 SV=1	ELP1_YEAST	153 kDa	NA	0.1	-0.11	12.125	0.415064	12.07	11.88	12.28	12.28	12.37	12.1	12.09	11.91	12.12	12.15
YLR388W	RPS29A	12	898651	898821	W	uS14|ribosomal 40S subunit protein S29A|S14|YS29|S36A|S29A|YS29A	Protein component of the small (40S) ribosomal subunit; homologous to mammalian ribosomal protein S29 and bacterial S14; RPS29A has a paralog, RPS29B, that arose from the whole genome duplication	443	40S ribosomal protein S29-A OS=Saccharomyces cerevisiae (strain ATCC 204508 / S288c) GN=RPS29A PE=1 SV=3	RS29A_YEAST	7 kDa	NA	0.048	-0.11	15.478	0.283189	15.66	15.71	15.34	15.59	15.4	15.27	15.38	15.44	15.55	15.44
YNL021W	HDA1	14	593227	595347	W	histone deacetylase HDA1	Putative catalytic subunit of a class II histone deacetylase complex; role in azole resistance via Hsp90p, and in the heat shock response; Hda1p interacts with the Hda2p-Hda3p subcomplex to form an active tetramer; deletion increases histone H2B, H3 and H4 acetylation; other members of the HDA1 histone deacetylase complex are Hda2p and Hda3p	594	Histone deacetylase HDA1 OS=Saccharomyces cerevisiae (strain ATCC 204508 / S288c) GN=HDA1 PE=1 SV=1	HDA1_YEAST	80 kDa	NA	0.093	-0.11	12.392	0.408254	12.34	12.46	12.62	12.41	12.39	12.45	12.27	12.27	12.25	12.46
YNL098C	RAS2	14	439602	440570	C	Ras family GTPase RAS2|TSL7|GLC5|CYR3|CTN5	GTP-binding protein; regulates nitrogen starvation response, sporulation, and filamentous growth; farnesylation and palmitoylation required for activity and localization to plasma membrane; homolog of mammalian Ras proto-oncogenes; RAS2 has a paralog, RAS1, that arose from the whole genome duplication	256	Ras-like protein 2 OS=Saccharomyces cerevisiae (strain ATCC 204508 / S288c) GN=RAS2 PE=1 SV=4	RAS2_YEAST	35 kDa	NA	0.012	-0.11	12.606	0.121882	12.71	12.73	12.63	12.63	12.57	12.55	12.61	12.54	12.62	12.47
YNL256W	FOL1	14	164623	167097	W	trifunctional dihydropteroate synthetase/dihydrohydroxymethylpterin pyrophosphokinase/dihydroneopterin aldolase FOL1	Multifunctional enzyme of the folic acid biosynthesis pathway; has dihydropteroate synthetase, dihydro-6-hydroxymethylpterin pyrophosphokinase, and dihydroneopterin aldolase activities	809	Folic acid synthesis protein FOL1 OS=Saccharomyces cerevisiae (strain ATCC 204508 / S288c) GN=FOL1 PE=1 SV=2	FOL1_YEAST	93 kDa	NA	0.17	-0.11	13.802	0.530482	13.68	13.4	14.11	14.02	14.09	13.85	13.65	13.67	13.88	13.67
YOR224C	RPB8	15	760825	761265	C	DNA-directed RNA polymerase core subunit RPB8|ABC14.5	RNA polymerase subunit ABC14.5; common to RNA polymerases I, II, and III	879	DNA-directed RNA polymerases I, II, and III subunit RPABC3 OS=Saccharomyces cerevisiae (strain ATCC 204508 / S288c) GN=RPB8 PE=1 SV=1	RPAB3_YEAST	17 kDa	NA	0.19	-0.11	14.052	0.560478	14.21	14.3	13.94	14.07	14.03	13.98	13.94	14.01	14.03	14.01
YOR229W	WTM2	15	768409	769812	W	transcriptional modulator	Transcriptional modulator; involved in regulation of meiosis, silencing, and expression of RNR genes; involved in response to replication stress; contains WD repeats; relocalizes to the cytosol in response to hypoxia; WTM2 has a paralog, UME1, that arose from the whole genome duplication	617	Transcriptional modulator WTM2 OS=Saccharomyces cerevisiae (strain ATCC 204508 / S288c) GN=WTM2 PE=1 SV=1	WTM2_YEAST	52 kDa	NA	0.1	-0.11	12.491	0.415064	12.59	12.59	12.47	12.55	12.52	12.35	12.53	12.54	12.25	12.52
YOR322C	LDB19	15	918606	921062	C	ART1	Alpha-arrestin involved in ubiquitin-dependent endocytosis; regulates endocytosis of plasma membrane proteins by recruiting the ubiquitin ligase Rsp5p to its targets; involved in the basal internalization and turnover of alpha-factor receptor Ste2p; recruits ubiquitin ligase Rsp5p to Ste2p via its 2 PPXY motifs; inhibited by Npr1p-mediated phosphorylation, which affects translocation between the …	1781	Protein LDB19 OS=Saccharomyces cerevisiae (strain ATCC 204508 / S288c) GN=LDB19 PE=1 SV=1	LDB19_YEAST	90 kDa	NA	0.59	-0.11	11.581	0.86431	11.76	11.23	11.83	11.7	11.52	11.21	11.83	11.6	11.69	11.44
YPL210C	SRP72	16	154290	156212	C	signal recognition particle subunit SRP72	Core component of the signal recognition particle (SRP); the SRP is a ribonucleoprotein (RNP) complex that functions in targeting nascent secretory proteins to the endoplasmic reticulum (ER) membrane	1071	Signal recognition particle subunit SRP72 OS=Saccharomyces cerevisiae (strain ATCC 204508 / S288c) GN=SRP72 PE=1 SV=2	SRP72_YEAST	74 kDa	TRUE	0.27	-0.11	11.206	0.64333	11.4	10.83	11.84	11.22	11.16	11.13	10.93	11.05	11.3	11.2
YAR015W	ADE1	1	169375	170295	W	phosphoribosylaminoimidazolesuccinocarboxamide synthase	N-succinyl-5-aminoimidazole-4-carboxamide ribotide synthetase; required for 'de novo' purine nucleotide biosynthesis; red pigment accumulates in mutant cells deprived of adenine; protein abundance increases in response to DNA replication stress	125	Phosphoribosylaminoimidazole-succinocarboxamide synthase OS=Saccharomyces cerevisiae (strain ATCC 204508 / S288c) GN=ADE1 PE=1 SV=2	PUR7_YEAST	35 kDa	NA	0.001	-0.1	14.435	0.0181119	14.55	14.61	14.39	14.46	14.37	14.28	14.7	14.36	14.31	14.32
YBL007C	SLA1	2	212632	216366	C	cytoskeletal protein-binding protein SLA1	Cytoskeletal protein binding protein; required for assembly of the cortical actin cytoskeleton; interacts with proteins regulating actin dynamics and proteins required for endocytosis; found in the nucleus and cell cortex; has 3 SH3 domains	230	Actin cytoskeleton-regulatory complex protein SLA1 OS=Saccharomyces cerevisiae (strain ATCC 204508 / S288c) GN=SLA1 PE=1 SV=1	SLA1_YEAST	136 kDa	NA	0.008	-0.1	13.452	0.088547	13.3	13.33	13.82	13.54	13.56	13.48	13.25	13.35	13.55	13.34
YBL105C	PKC1	2	14241	17696	C	protein kinase C|CLY7|CLY5|STT1|HPO2|CLY15	Protein serine/threonine kinase; essential for cell wall remodeling during growth; localized to sites of polarized growth and the mother-daughter bud neck; homolog of the alpha, beta, and gamma isoforms of mammalian protein kinase C (PKC)	620	Protein kinase C-like 1 OS=Saccharomyces cerevisiae (strain ATCC 204508 / S288c) GN=PKC1 PE=1 SV=3	KPC1_YEAST	131 kDa	NA	0.1	-0.1	12.161	0.415064	12.05	12.02	12.44	12.28	12.24	12.14	12.09	12.1	12.13	12.12
YBR024W	SCO2	2	289445	290350	W	putative thioredoxin peroxidase SCO2	Protein anchored to mitochondrial inner membrane; may have a redundant function with Sco1p in delivery of copper to cytochrome c oxidase; interacts with Cox2p; SCO2 has a paralog, SCO1, that arose from the whole genome duplication	625	Protein SCO2, mitochondrial OS=Saccharomyces cerevisiae (strain ATCC 204508 / S288c) GN=SCO2 PE=1 SV=1	SCO2_YEAST	35 kDa	NA	0.1	-0.1	12.908	0.415064	13.05	13.04	12.75	12.97	12.95	12.93	13.02	12.88	12.81	12.68
YBR081C	SPT7	2	401253	405251	C	SAGA histone acetyltransferase complex subunit SPT7|GIT2	Subunit of the SAGA transcriptional regulatory complex; involved in proper assembly of the complex; also present as a C-terminally truncated form in the SLIK/SALSA transcriptional regulatory complex	972	Transcriptional activator SPT7 OS=Saccharomyces cerevisiae (strain ATCC 204508 / S288c) GN=SPT7 PE=1 SV=1	SPT7_YEAST	153 kDa	NA	0.23	-0.1	12.838	0.607237	12.78	12.72	13.01	12.99	12.94	12.82	12.96	12.59	12.76	12.81
YBR244W	GPX2	2	707528	708016	W	glutathione peroxidase GPX2|AMI1	Phospholipid hydroperoxide glutathione peroxidase; protects cells from phospholipid hydroperoxides and nonphospholipid peroxides during oxidative stress; induced by glucose starvation; protein abundance increases in response to DNA replication stress	2421	Glutathione peroxidase 2 OS=Saccharomyces cerevisiae (strain ATCC 204508 / S288c) GN=GPX2 PE=1 SV=1	GPX2_YEAST	18 kDa	TRUE	0.89	-0.1	13.66	0.962463	13.8	13.79	13.51	13.71	13.62	13.45	14.14	13.6	13.63	13.35
YBR245C	ISW1	2	708150	711539	C	chromatin-remodeling ATPase ISW1|SGN2	ATPase subunit of imitation-switch (ISWI) class chromatin remodelers; with Ioc3p forms Isw1a complex involved in repression of transcription initiation; with Ioc2p and Ioc4p forms Isw1b complex involved in regulation of transcription elongation; Isw1b recruited to ORFs by H3K36 methylation and acts with Chd1p to prevent trans-histone exchange over coding regions; Isw1p import into nucleus depends…	838	ISWI chromatin-remodeling complex ATPase ISW1 OS=Saccharomyces cerevisiae (strain ATCC 204508 / S288c) GN=ISW1 PE=1 SV=2	ISW1_YEAST	131 kDa	TRUE	0.18	-0.1	12.882	0.549764	12.73	12.68	13.27	13.05	12.93	12.95	12.7	12.82	12.82	12.87
YDL051W	LHP1	4	363952	364779	W	YLA1|LAH1	RNA binding protein required for maturation of tRNA and U6 snRNA; acts as a molecular chaperone for RNAs transcribed by polymerase III; homologous to human La (SS-B) autoantigen	755	La protein homolog OS=Saccharomyces cerevisiae (strain ATCC 204508 / S288c) GN=LHP1 PE=1 SV=2	LHP1_YEAST	32 kDa	NA	0.15	-0.1	13.228	0.507843	13.33	13.45	13.14	13.22	13.18	13.01	13.52	13.23	13.09	13.11
YDL055C	PSA1	4	355674	356759	C	mannose-1-phosphate guanylyltransferase|SRB1|VIG9|MPG1	GDP-mannose pyrophosphorylase (mannose-1-phosphate guanyltransferase); synthesizes GDP-mannose from GTP and mannose-1-phosphate in cell wall biosynthesis; required for normal cell wall structure	113	Mannose-1-phosphate guanyltransferase OS=Saccharomyces cerevisiae (strain ATCC 204508 / S288c) GN=PSA1 PE=1 SV=2	MPG1_YEAST	40 kDa	TRUE	0.001	-0.1	13.598	0.0181119	13.74	13.83	13.48	13.57	13.63	13.6	13.48	13.52	13.53	13.6
YDL058W	USO1	4	345665	351037	W	INT1	Essential protein involved in vesicle-mediated ER to Golgi transport; binds membranes and functions during vesicle docking to the Golgi; required for assembly of the ER-to-Golgi SNARE complex	702	Intracellular protein transport protein USO1 OS=Saccharomyces cerevisiae (strain ATCC 204508 / S288c) GN=USO1 PE=1 SV=2	USO1_YEAST	206 kDa	NA	0.13	-0.1	12.97	0.470909	12.79	12.67	13.45	13.1	13.12	12.86	12.74	12.98	13.12	12.87
YDR129C	SAC6	4	713340	715379	C	fimbrin|ABP67	Fimbrin, actin-bundling protein; cooperates with Scp1p in organization and maintenance of the actin cytoskeleton; phosphorylated by Cdc28p/Clb2p in metaphase on T103, to regulate conformation, and modulate actin filament binding affinity and actin cable dynamics; relocalizes from the plasma membrane to the cytoplasm upon DNA replication stress; human homologs PLS3 and LCP1 implicated in spinocere…	1032	Fimbrin OS=Saccharomyces cerevisiae (strain ATCC 204508 / S288c) GN=SAC6 PE=1 SV=1	FIMB_YEAST	72 kDa	NA	0.25	-0.1	14.35	0.628031	14.19	13.93	14.91	14.48	14.58	14.49	13.93	14.18	14.62	14.19
YDR324C	UTP4	4	1114433	1116763	C		Subunit of U3-containing 90S preribosome and SSU processome complexes; involved in production of 18S rRNA and assembly of small ribosomal subunit; member of t-Utp subcomplex involved with transcription of 35S rRNA transcript; Small Subunit processome is also known as SSU processome	1490	U3 small nucleolar RNA-associated protein 4 OS=Saccharomyces cerevisiae (strain ATCC 204508 / S288c) GN=UTP4 PE=1 SV=1	UTP4_YEAST	88 kDa	NA	0.45	-0.1	12.508	0.78169	12.25	12.21	12.83	12.7	12.79	12.51	12.44	12.44	12.5	12.41
YDR452W	PPN1	4	1362878	1364902	W	endopolyphosphatase|PHM5	Dual endo- and exopolyphosphatase with a role in phosphate metabolism; acts as both an endopolyphosphatase cleaving long chains of polyphosphate distributively to generate shorter polymer chains and as an exopolyphosphatase catalyzing the hydrolysis of terminal phosphate from polyphosphate; localizes to the vacuole, nucleus and cytosol; functions as a homodimer; relocalizes from vacuole to cytopl…	1110	Endopolyphosphatase OS=Saccharomyces cerevisiae (strain ATCC 204508 / S288c) GN=PPN1 PE=1 SV=1	PPN1_YEAST	78 kDa	NA	0.28	-0.1	13.75	0.649821	13.84	13.92	13.68	13.78	13.75	13.7	13.85	13.6	13.58	13.8
YGL120C	PRP43	7	281634	283937	C	DEAH-box ATP-dependent RNA helicase PRP43|JA1	RNA helicase in the DEAH-box family; functions in both RNA polymerase I and polymerase II transcript metabolism; catalyzes removal of U2, U5, and U6 snRNPs from the postsplicing lariat-intron ribonucleoprotein complex; required for efficient biogenesis of both small- and large-subunit rRNAs; acts with Sqs1p to promote 20S to 18S rRNA processing catalyzed by endonuclease Nob1p	957	Pre-mRNA-splicing factor ATP-dependent RNA helicase PRP43 OS=Saccharomyces cerevisiae (strain ATCC 204508 / S288c) GN=PRP43 PE=1 SV=1	PRP43_YEAST	88 kDa	TRUE	0.22	-0.1	14.142	0.594161	13.94	13.73	14.62	14.27	14.35	14.25	13.97	14.02	14.29	13.98
YGL150C	INO80	7	221104	225573	C	chromatin-remodeling ATPase INO80	ATPase and nucleosome spacing factor; subunit of complex containing actin and actin-related proteins that has chromatin remodeling activity and 3' to 5' DNA helicase activity in vitro; promotes nucleosome shifts in the 3 prime direction; has a role in modulating stress gene transcription	994	Putative DNA helicase INO80 OS=Saccharomyces cerevisiae (strain ATCC 204508 / S288c) GN=INO80 PE=1 SV=1	INO80_YEAST	171 kDa	TRUE	0.24	-0.1	12.885	0.618507	12.81	12.5	13.32	13.05	13.03	12.9	12.69	12.8	13.03	12.72
YGL222C	EDC1	7	80659	81186	C		RNA-binding protein that activates mRNA decapping directly; binds to mRNA substrate and enhances activity of decapping proteins Dcp1p and Dcp2p; has a role in translation during heat stress; protein becomes more abundant and forms cytoplasmic foci in response to DNA replication stress; EDC1 has a paralog, EDC2, that arose from the whole genome duplication	888	Enhancer of mRNA-decapping protein 1 OS=Saccharomyces cerevisiae (strain ATCC 204508 / S288c) GN=EDC1 PE=1 SV=1	EDC1_YEAST	19 kDa	NA	0.2	-0.1	14.168	0.571744	14.36	14.43	13.94	14.27	14.12	14.17	14.18	14.16	13.98	14.07
YHR008C	SOD2	8	122889	123590	C	superoxide dismutase SOD2	Mitochondrial manganese superoxide dismutase; protects cells against oxygen toxicity and oxidative stress; human mitochondrial SOD2 can complement a yeast null mutant and human cytoplasmic SOD1 can also complement when targeted to the mitochondrial matrix	1269	Superoxide dismutase [Mn], mitochondrial OS=Saccharomyces cerevisiae (strain ATCC 204508 / S288c) GN=SOD2 PE=1 SV=1	SODM_YEAST	26 kDa	NA	0.35	-0.1	14.04	0.714905	14.19	14.27	13.95	14	13.94	13.77	14.43	14.04	13.84	13.97
YHR087W	RTC3	8	280820	281155	W	HGI1	Protein of unknown function involved in RNA metabolism; has structural similarity to SBDS, the human protein mutated in Shwachman-Diamond Syndrome (the yeast SBDS ortholog = SDO1); null mutation suppresses cdc13-1 temperature sensitivity; protein abundance increases in response to DNA replication stress	2486	Restriction of telomere capping protein 3 OS=Saccharomyces cerevisiae (strain ATCC 204508 / S288c) GN=RTC3 PE=1 SV=1	SDO1L_YEAST	12 kDa	NA	0.93	-0.1	13.964	0.975972	14.03	14.08	14.14	13.87	13.73	13.7	14.69	13.85	13.98	13.57
YHR143W-A	RPC10	8	387233	387445	W	DNA-directed RNA polymerase core subunit RPC10|ABC10-alpha|RPB12	RNA polymerase subunit ABC10-alpha, found in RNA pol I, II, and III; relocalizes from nucleolus to cytoplasm upon DNA replication stress	751	DNA-directed RNA polymerases I, II, and III subunit RPABC4 OS=Saccharomyces cerevisiae (strain ATCC 204508 / S288c) GN=RPC10 PE=1 SV=1	RPAB4_YEAST	8 kDa	NA	0.15	-0.1	13.955	0.507843	14.08	14.14	13.91	14.08	13.81	13.69	14	13.97	14.02	13.85
YIL118W	RHO3	9	139752	140447	W	Rho family GTPase RHO3	Non-essential small GTPase of the Rho/Rac family of Ras-like proteins; involved in the establishment of cell polarity; GTPase activity positively regulated by the GTPase activating protein (GAP) Rgd1p	142	GTP-binding protein RHO3 OS=Saccharomyces cerevisiae (strain ATCC 204508 / S288c) GN=RHO3 PE=1 SV=2	RHO3_YEAST	25 kDa	NA	0.001	-0.1	14.391	0.0181119	14.58	14.63	14.29	14.43	14.31	14.36	14.35	14.27	14.31	14.38
YJL087C	TRL1	10	270002	272485	C	tRNA ligase|RLG1|LIG1	tRNA ligase; required for tRNA splicing and for both splicing and translation of HAC1 mRNA in the UPR; has phosphodiesterase, polynucleotide kinase, and ligase activities; localized at the inner nuclear envelope and partially to polysomes	645	tRNA ligase OS=Saccharomyces cerevisiae (strain ATCC 204508 / S288c) GN=TRL1 PE=1 SV=1	TRNL_YEAST	95 kDa	NA	0.11	-0.1	12.741	0.438983	12.67	12.67	12.99	12.73	12.94	12.78	12.47	12.68	12.71	12.77
YJR105W	ADO1	10	623581	624603	W	adenosine kinase	Adenosine kinase; required for the utilization of S-adenosylmethionine (AdoMet); may be involved in recycling adenosine produced through the methyl cycle	297	Adenosine kinase OS=Saccharomyces cerevisiae (strain ATCC 204508 / S288c) GN=ADO1 PE=1 SV=1	ADK_YEAST	36 kDa	NA	0.019	-0.1	13.474	0.165134	13.61	13.72	13.4	13.47	13.38	13.32	13.7	13.37	13.43	13.34
YKL087C	CYT2	11	277189	277863	C	cytochrome c1 heme lyase CYT2|CC1HL	Cytochrome c1 heme lyase; involved in maturation of cytochrome c1, which is a subunit of the mitochondrial ubiquinol-cytochrome-c reductase; links heme covalently to apocytochrome c1; human homolog HCCS can complement yeast cyt2 null mutant	653	Cytochrome c1 heme lyase OS=Saccharomyces cerevisiae (strain ATCC 204508 / S288c) GN=CYT2 PE=3 SV=1	CYT2_YEAST	26 kDa	NA	0.11	-0.1	14.235	0.438983	14.44	14.38	14.16	14.25	14.18	14.12	14.21	14.19	14.17	14.25
YKL167C	MRP49	11	133721	134134	C	mitochondrial 54S ribosomal protein MRP49	Mitochondrial ribosomal protein of the large subunit; not essential for mitochondrial translation	1276	54S ribosomal protein MRP49, mitochondrial OS=Saccharomyces cerevisiae (strain ATCC 204508 / S288c) GN=MRP49 PE=1 SV=1	RM49_YEAST	16 kDa	NA	0.35	-0.1	12.987	0.714905	13.12	12.98	12.9	13.18	12.99	12.6	13.42	12.83	12.85	13
YKR042W	UTH1	11	519527	520624	W	SUN family protein UTH1	Mitochondrial inner membrane protein; role in mitophagy is disputed; implicated in cell wall biogenesis, the oxidative stress response, life span during starvation, and cell death; SUN family member; UTH1 has a paralog, NCA3, that arose from the whole genome duplication	977	Probable secreted beta-glucosidase UTH1 OS=Saccharomyces cerevisiae (strain ATCC 204508 / S288c) GN=UTH1 PE=1 SV=2	UTH1_YEAST	37 kDa	NA	0.23	-0.1	12.127	0.607237	12.25	12.21	12.15	12.24	11.98	11.82	12.42	12.17	11.99	12.04
YKR068C	BET3	11	570328	570909	C	TRAPP complex core subunit BET3	Core component of transport protein particle (TRAPP) complexes I-III; TRAPP complexes are related multimeric guanine nucleotide-exchange factors for the GTPase Ypt1, regulating ER-Golgi traffic (TRAPPI), intra-Golgi traffic (TRAPPII), endosome-Golgi traffic (TRAPPII and III) and autophagy (TRAPPIII); hydrophilic homodimeric protein that acts in conjunction with SNARE proteins in targeting and fus…	891	Trafficking protein particle complex subunit BET3 OS=Saccharomyces cerevisiae (strain ATCC 204508 / S288c) GN=BET3 PE=1 SV=1	BET3_YEAST	22 kDa	NA	0.2	-0.1	14.324	0.571744	14.37	14.52	14.3	14.49	14.16	14.2	14.39	14.27	14.25	14.29
YLR187W	SKG3	12	524865	527945	W		Protein of unknown function; green fluorescent protein (GFP)-fusion protein localizes to the cell periphery, cytoplasm, bud, and bud neck; potential Cdc28p substrate; similar to Skg4p; relocalizes from bud neck to cytoplasm upon DNA replication stress; SKG3 has a paralog, CAF120, that arose from the whole genome duplication	562	Protein SKG3 OS=Saccharomyces cerevisiae (strain ATCC 204508 / S288c) GN=SKG3 PE=1 SV=1	SKG3_YEAST	114 kDa	NA	0.082	-0.1	11.841	0.380609	11.83	11.68	12	11.98	11.97	11.7	11.82	11.83	11.87	11.73
YLR420W	URA4	12	963785	964879	W	dihydroorotase	Dihydroorotase; catalyzes the third enzymatic step in the de novo biosynthesis of pyrimidines, converting carbamoyl-L-aspartate into dihydroorotate	506	Dihydroorotase OS=Saccharomyces cerevisiae (strain ATCC 204508 / S288c) GN=URA4 PE=1 SV=2	PYRC_YEAST	40 kDa	NA	0.064	-0.1	13.406	0.330858	13.49	13.57	13.39	13.43	13.39	13.23	13.51	13.39	13.38	13.28
YML010W	SPT5	13	247677	250868	W	transcription elongation factor SPT5	Spt4p/5p (DSIF) transcription elongation factor complex subunit; the Spt4/5 complex binds to ssRNA in a sequence-specific manner, and in concert with RNAP I and II has multiple roles regulating transcriptional elongation, RNA processing, quality control, and transcription-coupled repair; interacts with DNA upstream of RNAPII and the non-template strand of the transcription bubble; Spt5p is the on…	112	Transcription elongation factor SPT5 OS=Saccharomyces cerevisiae (strain ATCC 204508 / S288c) GN=SPT5 PE=1 SV=1	SPT5_YEAST	116 kDa	NA	0.001	-0.1	13.072	0.0181119	12.95	12.86	13.37	13.15	13.32	13.16	12.79	13.03	13.06	13.03
YMR156C	TPP1	13	570300	571016	C	polynucleotide 3'-phosphatase	DNA 3'-phosphatase; functions in repair of endogenous damage of double-stranded DNA, activity is specific for removal of 3' phosphates at strand breaks; similar to the l-2-haloacid dehalogenase superfamily; homolog of human polynucleotide kinase/3'-phosphatase	1083	Polynucleotide 3'-phosphatase OS=Saccharomyces cerevisiae (strain ATCC 204508 / S288c) GN=TPP1 PE=3 SV=1	TPP1_YEAST	27 kDa	NA	0.27	-0.1	11.91	0.64333	12.03	11.89	11.89	12.05	11.9	11.72	11.99	11.94	11.76	11.93
YMR202W	ERG2	13	667537	668205	W	C-8 sterol isomerase ERG2|END11	C-8 sterol isomerase; catalyzes isomerization of delta-8 double bond to delta-7 position at an intermediate step in ergosterol biosynthesis; transcriptionally down-regulated when ergosterol is in excess; mutation is functionally complemented by human EBP	1937	C-8 sterol isomerase OS=Saccharomyces cerevisiae (strain ATCC 204508 / S288c) GN=ERG2 PE=1 SV=1	ERG2_YEAST	25 kDa	NA	0.66	-0.1	11.523	0.885699	11.18	11.59	11.81	11.8	11.44	11.61	11.16	11.48	11.68	11.48
YMR294W	JNM1	13	856966	858087	W	PAC3|INS1	Component of the yeast dynactin complex; consisting of Nip100p, Jnm1p, and Arp1p; required for proper nuclear migration and spindle partitioning during mitotic anaphase B	795	Nuclear migration protein JNM1 OS=Saccharomyces cerevisiae (strain ATCC 204508 / S288c) GN=JNM1 PE=1 SV=2	JNM1_YEAST	44 kDa	NA	0.16	-0.1	12.277	0.51995	12.33	12.38	12.25	12.38	12.26	12.11	12.55	12.14	12.1	12.27
YMR309C	NIP1	13	892988	895426	C	translation initiation factor eIF3 core subunit c	eIF3c subunit of the eukaryotic translation initiation factor 3 (eIF3); involved in the assembly of preinitiation complex and start codon selection; eIF3 is also involved in programmed stop codon readthrough	655	Eukaryotic translation initiation factor 3 subunit C OS=Saccharomyces cerevisiae (strain ATCC 204508 / S288c) GN=NIP1 PE=1 SV=2	EIF3C_YEAST	93 kDa	NA	0.12	-0.1	13.377	0.456388	13.12	13.01	13.86	13.54	13.62	13.44	13.1	13.26	13.64	13.18
YNL192W	CHS1	14	276502	279897	W	chitin synthase CHS1|USA4	Chitin synthase I; requires activation from zymogenic form in order to catalyze the transfer of N-acetylglucosamine (GlcNAc) to chitin; required for repairing the chitin septum during cytokinesis; transcription activated by mating factor	1311	Chitin synthase 1 OS=Saccharomyces cerevisiae (strain ATCC 204508 / S288c) GN=CHS1 PE=1 SV=2	CHS1_YEAST	130 kDa	NA	0.37	-0.1	12.022	0.725985	11.86	11.89	12.62	12.07	12.03	12.14	11.73	11.85	12.01	12.02
YNL243W	SLA2	14	188051	190957	W	MOP2|END4	Adaptor protein that links actin to clathrin and endocytosis; involved in membrane cytoskeleton assembly and cell polarization; present in the actin cortical patch of the emerging bud tip; dimer in vivo	717	Protein SLA2 OS=Saccharomyces cerevisiae (strain ATCC 204508 / S288c) GN=SLA2 PE=1 SV=5	SLA2_YEAST	109 kDa	NA	0.13	-0.1	12.558	0.470909	12.43	12.29	13.01	12.77	12.61	12.39	12.54	12.51	12.64	12.39
YNL297C	MON2	14	71673	76583	C	YSL2	Protein with a role in endocytosis and vacuole integrity; peripheral membrane protein; interacts with and negatively regulates Arl1p; localizes to the endosome; member of the Sec7p family of proteins	798	Protein MON2 OS=Saccharomyces cerevisiae (strain ATCC 204508 / S288c) GN=MON2 PE=1 SV=1	MON2_YEAST	187 kDa	NA	0.16	-0.1	14.817	0.51995	14.96	14.89	14.99	14.8	14.77	14.93	14.64	14.55	14.83	14.81
YNR021W	YNR021W	14	668377	669591	W		Putative protein of unknown function; green fluorescent protein (GFP)-fusion protein localizes to the endoplasmic reticulum; YNR021W is not an essential gene	1249	UPF0674 endoplasmic reticulum membrane protein YNR021W OS=Saccharomyces cerevisiae (strain ATCC 204508 / S288c) GN=YNR021W PE=1 SV=3	YN8B_YEAST	47 kDa	TRUE	0.34	-0.1	14.58	0.701673	14.48	14.06	15.17	14.81	14.72	14.66	14.15	14.34	14.91	14.5
YOL031C	SIL1	15	266264	267529	C	SLS1	Nucleotide exchange factor for the ER lumenal Hsp70 chaperone Kar2p; required for protein translocation into the endoplasmic reticulum (ER); homolog of Yarrowia lipolytica SLS1; GrpE-like protein	321	Nucleotide exchange factor SIL1 OS=Saccharomyces cerevisiae (strain ATCC 204508 / S288c) GN=SIL1 PE=1 SV=1	SIL1_YEAST	48 kDa	NA	0.022	-0.1	13.945	0.179182	14.08	14.11	13.83	14.06	13.89	13.85	13.97	13.99	13.74	13.93
YOL038W	PRE6	15	255337	256101	W	proteasome core particle subunit alpha 4	Alpha 4 subunit of the 20S proteasome; may replace alpha 3 subunit (Pre9p) under stress conditions to create a more active proteasomal isoform; GFP-fusion protein relocates from cytosol to the mitochondrial surface upon oxidative stress	509	Proteasome subunit alpha type-4 OS=Saccharomyces cerevisiae (strain ATCC 204508 / S288c) GN=PRE6 PE=1 SV=1	PSA4_YEAST	28 kDa	NA	0.065	-0.1	14.317	0.333366	14.46	14.52	14.21	14.39	14.2	14.09	14.5	14.34	14.3	14.16
YOL052C	SPE2	15	232446	233636	C	adenosylmethionine decarboxylase SPE2	S-adenosylmethionine decarboxylase; required for the biosynthesis of spermidine and spermine; cells lacking Spe2p require spermine or spermidine for growth in the presence of oxygen but not when grown anaerobically	268	S-adenosylmethionine decarboxylase proenzyme OS=Saccharomyces cerevisiae (strain ATCC 204508 / S288c) GN=SPE2 PE=1 SV=1	DCAM_YEAST	46 kDa	NA	0.014	-0.1	12.946	0.13683	13.05	13.1	12.92	12.96	12.96	12.88	12.88	12.88	12.88	12.95
YOR109W	INP53	15	525278	528601	W	phosphatidylinositol-3-/phosphoinositide 5-phosphatase INP53|SOP2|SJL3	Polyphosphatidylinositol phosphatase; dephosphorylates multiple phosphatidylinositol phosphates; involved in trans Golgi network-to-early endosome pathway; hyperosmotic stress causes translocation to actin patches; contains Sac1 and 5-ptase domains; INP53 has a paralog, INP52, that arose from the whole genome duplication	458	Polyphosphatidylinositol phosphatase INP53 OS=Saccharomyces cerevisiae (strain ATCC 204508 / S288c) GN=INP53 PE=1 SV=1	INP53_YEAST	125 kDa	TRUE	0.052	-0.1	12.885	0.296	12.82	12.67	13.25	12.96	13.05	12.72	12.77	12.74	12.98	12.89
YOR386W	PHR1	15	1066839	1068536	W	deoxyribodipyrimidine photo-lyase PHR1	DNA photolyase involved in photoreactivation; repairs pyrimidine dimers in the presence of visible light; induced by DNA damage; regulated by transcriptional repressor Rph1p	1899	Deoxyribodipyrimidine photo-lyase, mitochondrial OS=Saccharomyces cerevisiae (strain ATCC 204508 / S288c) GN=PHR1 PE=1 SV=1	PHR_YEAST	66 kDa	NA	0.65	-0.1	15.608	0.879112	15.9	15.91	15.23	15.72	15.45	15.63	15.51	15.71	15.56	15.46
YPL086C	ELP3	16	384773	386446	C	Elongator subunit ELP3|KAT9|KTI8|TOT3|HPA1	Subunit of Elongator complex; Elongator is required for modification of wobble nucleosides in tRNA; exhibits histone acetyltransferase activity that is directed to histones H3 and H4; disruption confers resistance to K. lactis zymotoxin; human homolog ELP3 can partially complement yeast elp3 null mutant	1445	Elongator complex protein 3 OS=Saccharomyces cerevisiae (strain ATCC 204508 / S288c) GN=ELP3 PE=1 SV=1	ELP3_YEAST	64 kDa	NA	0.43	-0.1	13.652	0.76754	13.49	13.26	14.1	13.74	13.9	13.67	13.56	13.49	13.75	13.56
YPL243W	SRP68	16	88517	90316	W	signal recognition particle subunit SRP68	Core component of the signal recognition particle (SRP) complex; SRP complex functions in targeting nascent secretory proteins to the endoplasmic reticulum (ER) membrane; relocalizes from cytoplasm to the nuclear periphery upon DNA replication stress	965	Signal recognition particle subunit SRP68 OS=Saccharomyces cerevisiae (strain ATCC 204508 / S288c) GN=SRP68 PE=1 SV=1	SRP68_YEAST	69 kDa	NA	0.22	-0.1	13.956	0.594161	13.73	13.7	14.38	14.08	14.19	14.12	13.48	13.86	14.14	13.88
YCR011C	ADP1	3	133724	136873	C	putative ATP-dependent permease ADP1	Putative ATP-dependent permease of the ABC transporter family	492	Probable ATP-dependent permease OS=Saccharomyces cerevisiae (strain ATCC 204508 / S288c) GN=ADP1 PE=1 SV=2	ADP1_YEAST	117 kDa	NA	0.059	-0.09	13.154	0.313135	13.25	13.06	13.25	13.36	13.11	12.94	13.2	13.13	13.12	13.12
YDL085C-A	YDL085C-A	4	302464	302670	C		Putative protein of unknown function; green fluorescent protein (GFP)-fusion protein localizes to the cytoplasm and nucleus	2038	SERF-like protein YDL085C-A OS=Saccharomyces cerevisiae (strain ATCC 204508 / S288c) GN=YDL085C-A PE=1 SV=1	YD85C_YEAST	8 kDa	NA	0.71	-0.09	15.132	0.900539	15.33	15.36	15.03	15.06	14.98	14.93	15.64	15.07	15.02	14.9
YDR063W	AIM7	4	578663	579112	W	GMF1|GMF	Protein that interacts with Arp2/3 complex; interacts with Arp2/3 complex to stimulate actin filament debranching and inhibit actin nucleation; has similarity to Cof1p and also to human glia maturation factor (GMF); null mutant displays elevated mitochondrial genome loss	1461	Protein AIM7 OS=Saccharomyces cerevisiae (strain ATCC 204508 / S288c) GN=AIM7 PE=1 SV=1	AIM7_YEAST	17 kDa	NA	0.43	-0.09	15.872	0.76754	15.94	15.93	16.16	15.8	15.77	15.64	16.28	15.83	15.91	15.46
YDR457W	TOM1	4	1369790	1379596	W	E3 ubiquitin-protein ligase TOM1	E3 ubiquitin ligase of the hect-domain class; has a role in mRNA export from the nucleus and may regulate transcriptional coactivators; involved in degradation of excess histones; interacts with Dia2p and is required for Dia2p degradation; required to target Cdc6p for ubiquitin-mediated destruction during G1 phase	1224	E3 ubiquitin-protein ligase TOM1 OS=Saccharomyces cerevisiae (strain ATCC 204508 / S288c) GN=TOM1 PE=1 SV=1	TOM1_YEAST	374 kDa	NA	0.33	-0.09	12.569	0.695443	12.41	12.08	12.93	12.86	12.74	12.41	12.78	12.39	12.61	12.48
YDR486C	VPS60	4	1427431	1428120	C	CHM5|MOS10	Protein involved in late endosome to vacuole transport; cytoplasmic and vacuolar membrane protein; required for normal filament maturation during pseudohyphal growth; may function in targeting cargo proteins for degradation; interacts with Vta1p	2476	Vacuolar protein-sorting-associated protein 60 OS=Saccharomyces cerevisiae (strain ATCC 204508 / S288c) GN=VPS60 PE=1 SV=2	VPS60_YEAST	26 kDa	NA	0.92	-0.09	11.824	0.973366	11.87	12.02	11.87	11.69	11.81	11.72	12.33	11.8	11.69	11.44
YDR527W	RBA50	4	1491094	1492413	W		Protein involved in transcription; interacts with RNA polymerase II subunits Rpb2p, Rpb3, and Rpb11p; has similarity to human RPAP1	822	RNA polymerase II-associated protein RBA50 OS=Saccharomyces cerevisiae (strain ATCC 204508 / S288c) GN=RBA50 PE=1 SV=2	RBA50_YEAST	50 kDa	NA	0.17	-0.09	14.197	0.530482	14.22	14.34	14.29	14.24	14.09	14.07	14.31	14.25	14	14.16
YEL038W	UTR4	5	80462	81145	W	putative acireductone synthase UTR4	Protein with sequence similarity to acireductone synthases; involved in methionine salvage; found in both the cytoplasm and nucleus	904	Enolase-phosphatase E1 OS=Saccharomyces cerevisiae (strain ATCC 204508 / S288c) GN=UTR4 PE=1 SV=2	ENOPH_YEAST	25 kDa	NA	0.2	-0.09	13.842	0.571744	13.93	13.96	13.87	13.85	13.77	13.67	14.19	13.82	13.74	13.62
YER057C	HMF1	5	270737	271126	C	putative isoleucine biosynthesis protein HMF1|HIG1	Member of the p14.5 protein family; functionally complements Mmf1p function when targeted to mitochondria; heat shock inducible; high-dosage growth inhibitor; forms a homotrimer in vitro; HMF1 has a paralog, MMF1, that arose from the whole genome duplication	1585	Protein HMF1 OS=Saccharomyces cerevisiae (strain ATCC 204508 / S288c) GN=HMF1 PE=1 SV=1	HMF1_YEAST	14 kDa	NA	0.5	-0.09	15.041	0.813442	15.1	15.19	15.06	14.99	14.96	14.78	15.58	14.92	14.95	14.88
YFL044C	OTU1	6	44655	45560	C	ubiquitin-specific protease OTU1|YOD1	Deubiquitylation enzyme that binds to the chaperone-ATPase Cdc48p; may contribute to regulation of protein degradation by deubiquitylating substrates that have been ubiquitylated by Ufd2p; member of the Ovarian Tumor (OTU) family; protein abundance increases in response to DNA replication stress	760	Ubiquitin thioesterase OTU1 OS=Saccharomyces cerevisiae (strain ATCC 204508 / S288c) GN=OTU1 PE=1 SV=1	OTU1_YEAST	34 kDa	NA	0.15	-0.09	14.678	0.507843	14.86	14.88	14.53	14.69	14.69	14.54	14.79	14.58	14.63	14.59
YGL027C	CWH41	7	443642	446143	C	DER7|GLS1	Processing alpha glucosidase I; ER type II integral membrane N-glycoprotein involved in assembly of cell wall beta 1,6 glucan and asparagine-linked protein glycosylation; also involved in ER protein quality control and sensing of ER stress	1067	Mannosyl-oligosaccharide glucosidase OS=Saccharomyces cerevisiae (strain ATCC 204508 / S288c) GN=CWH41 PE=1 SV=1	CWH41_YEAST	97 kDa	NA	0.26	-0.09	13.211	0.635283	13.09	12.87	13.63	13.36	13.39	13.29	12.9	13.09	13.3	13.19
YGR033C	TIM21	7	554248	554967	C	FMP17	Nonessential component of the TIM23 complex; interacts with the Translocase of the Outer Mitochondrial membrane (TOM complex) and with respiratory enzymes; may regulate the Translocase of the Inner Mitochondrial membrane (TIM23 complex) activity	651	Mitochondrial import inner membrane translocase subunit TIM21 OS=Saccharomyces cerevisiae (strain ATCC 204508 / S288c) GN=TIM21 PE=1 SV=1	TIM21_YEAST	27 kDa	NA	0.11	-0.09	13.88	0.438983	13.96	13.84	13.85	14.09	13.91	13.94	13.53	13.84	13.88	13.96
YGR042W	MTE1	7	579476	580291	W		Protein of unknown function; involved in maintenance of proper telomere length; green fluorescent protein (GFP)-fusion protein localizes to both the cytoplasm and the nucleus; forms nuclear foci upon DNA replication stress	1517	Uncharacterized protein YGR042W OS=Saccharomyces cerevisiae (strain ATCC 204508 / S288c) GN=YGR042W PE=4 SV=1	YG1T_YEAST	31 kDa	NA	0.46	-0.09	12.691	0.790577	12.68	12.4	12.97	13.06	12.67	12.54	12.43	13.03	12.53	12.6
YGR128C	UTP8	7	747950	750091	C		Nucleolar protein required for export of tRNAs from the nucleus; also copurifies with the small subunit (SSU) processome containing the U3 snoRNA that is involved in processing of pre-18S rRNA	2041	U3 small nucleolar RNA-associated protein 8 OS=Saccharomyces cerevisiae (strain ATCC 204508 / S288c) GN=UTP8 PE=1 SV=1	UTP8_YEAST	80 kDa	NA	0.71	-0.09	13.881	0.900539	13.7	13.41	14.2	14.07	14.15	13.98	13.65	13.57	14.12	13.96
YGR162W	TIF4631	7	824059	826917	W	translation initiation factor eIF4G|eiF4G1	Translation initiation factor eIF4G; subunit of the mRNA cap-binding protein complex (eIF4F) that also contains eIF4E (Cdc33p); interacts with Pab1p and with eIF4A (Tif1p); also has a role in biogenesis of the large ribosomal subunit; TIF4631 has a paralog, TIF4632, that arose from the whole genome duplication	203	Eukaryotic initiation factor 4F subunit p150 OS=Saccharomyces cerevisiae (strain ATCC 204508 / S288c) GN=TIF4631 PE=1 SV=2	IF4F1_YEAST	107 kDa	TRUE	0.0057	-0.09	13.667	0.0736493	13.52	13.45	14.02	13.75	13.87	13.9	13.25	13.54	13.76	13.61
YGR280C	PXR1	7	1050910	1051725	C	telomerase inhibitor|PinX1|GNO1	Essential protein involved in rRNA and snoRNA maturation; competes with TLC1 RNA for binding to Est2p, suggesting a role in negative regulation of telomerase; human homolog inhibits telomerase; contains a G-patch RNA interacting domain	366	Protein PXR1 OS=Saccharomyces cerevisiae (strain ATCC 204508 / S288c) GN=PXR1 PE=1 SV=1	PXR1_YEAST	31 kDa	NA	0.032	-0.09	14.502	0.22895	14.65	14.7	14.36	14.54	14.49	14.47	14.52	14.47	14.38	14.44
YHR141C	RPL42B	8	381990	382751	C	eL42|ribosomal 60S subunit protein L42B|L44e|YP44|YL27|L42B|L41B|MAK18	Ribosomal 60S subunit protein L42B; required for propagation of the killer toxin-encoding M1 double-stranded RNA satellite of the L-A double-stranded RNA virus; homologous to mammalian ribosomal protein L36A, no bacterial homolog; RPL42B has a paralog, RPL42A, that arose from the whole genome duplication	435	60S ribosomal protein L42-B OS=Saccharomyces cerevisiae (strain ATCC 204508 / S288c) GN=RPL42B PE=1 SV=1	RL44B_YEAST	12 kDa	NA	0.046	-0.09	15.016	0.273885	15.2	15.21	14.91	15.09	14.91	14.91	14.98	14.97	15	14.98
YIL064W	EFM4	9	241943	242716	W	SEE1	Lysine methyltransferase; involved in the dimethylation of eEF1A (Tef1p/Tef2p) at lysine 316; sequence similarity to S-adenosylmethionine-dependent methyltransferases of the seven beta-strand family; role in vesicular transport	2175	Protein-lysine N-methyltransferase EFM4 OS=Saccharomyces cerevisiae (strain ATCC 204508 / S288c) GN=EFM4 PE=1 SV=1	EFM4_YEAST	29 kDa	NA	0.77	-0.09	13.876	0.925	14.04	14.08	13.82	13.73	13.81	13.76	14.35	13.76	13.71	13.7
YIL129C	TAO3	9	106107	113237	C	PAG1	Component of the RAM signaling network; is involved in regulation of Ace2p activity and cellular morphogenesis, interacts with protein kinase Cbk1p and also with Kic1p	1031	Cell morphogenesis protein PAG1 OS=Saccharomyces cerevisiae (strain ATCC 204508 / S288c) GN=TAO3 PE=1 SV=1	TAO3_YEAST	270 kDa	NA	0.25	-0.09	12.181	0.628031	12.16	12.02	12.64	12.2	12.25	11.86	12.09	12.15	12.17	12.27
YIL157C	COA1	9	46949	47542	C	FMP35	Mitochondrial inner membrane protein; required for assembly of the cytochrome c oxidase complex (complex IV); interacts with complex IV assembly factor Shy1p during the early stages of assembly	715	Cytochrome c oxidase assembly factor 1 OS=Saccharomyces cerevisiae (strain ATCC 204508 / S288c) GN=COA1 PE=1 SV=1	COA1_YEAST	22 kDa	NA	0.13	-0.09	13.378	0.470909	13.43	13.6	13.22	13.42	13.43	13.29	13.46	13.27	13.33	13.33
YIR035C	YIR035C	9	421026	421790	C	sepiapterin reductase family protein	Putative cytoplasmic short-chain dehydrogenase/reductase	975	Uncharacterized oxidoreductase YIR035C OS=Saccharomyces cerevisiae (strain ATCC 204508 / S288c) GN=YIR035C PE=1 SV=1	YIV5_YEAST	27 kDa	NA	0.23	-0.09	12.182	0.607237	12.34	12.36	12.15	12.14	12.12	12.04	12.35	12.15	11.98	12.19
YJR001W	AVT1	10	436802	438610	W		Vacuolar transporter; imports large neutral amino acids into the vacuole; member of a family of seven S. cerevisiae genes (AVT1-7) related to vesicular GABA-glycine transporters	1045	Vacuolar amino acid transporter 1 OS=Saccharomyces cerevisiae (strain ATCC 204508 / S288c) GN=AVT1 PE=1 SV=1	AVT1_YEAST	65 kDa	NA	0.26	-0.09	12.408	0.635283	12.29	12.47	12.68	12.48	12.35	12.33	12.35	12.27	12.51	12.35
YKL024C	URA6	11	392526	393140	C	bifunctional uridylate/adenylate kinase|SOC8	Uridylate kinase; catalyzes the seventh enzymatic step in the de novo biosynthesis of pyrimidines, converting uridine monophosphate (UMP) into uridine-5'-diphosphate (UDP)	1822	Uridylate kinase OS=Saccharomyces cerevisiae (strain ATCC 204508 / S288c) GN=URA6 PE=1 SV=1	KCY_YEAST	23 kDa	NA	0.61	-0.09	14.268	0.872873	14.28	14.38	14.39	14.24	14.15	13.92	14.85	14.23	14.2	14.04
YKL077W	YKL077W	11	291453	292631	W		Putative protein of unknown function; green fluorescent protein (GFP)-fusion protein localizes to the vacuole	481	Uncharacterized protein YKL077W OS=Saccharomyces cerevisiae (strain ATCC 204508 / S288c) GN=YKL077W PE=1 SV=1	YKH7_YEAST	46 kDa	NA	0.057	-0.09	13.851	0.310147	14.05	14.08	13.77	13.9	13.89	13.87	13.38	13.81	13.84	13.92
YLR078C	BOS1	12	285736	286559	C	SEC32	v-SNARE (vesicle specific SNAP receptor); localized to the endoplasmic reticulum membrane and necessary for vesicular transport from the ER to the Golgi; required for efficient nuclear fusion during mating	833	Protein transport protein BOS1 OS=Saccharomyces cerevisiae (strain ATCC 204508 / S288c) GN=BOS1 PE=1 SV=1	BOS1_YEAST	28 kDa	NA	0.17	-0.09	12.587	0.530482	12.46	12.62	12.71	12.69	12.69	12.58	12.45	12.57	12.61	12.49
YLR083C	EMP70	12	294091	296094	C	TMN1|p24a	Protein with a role in cellular adhesion and filamentous growth; also endosome-to-vacuole sorting; similar to Tmn3p; member of Transmembrane Nine family of proteins with 9 transmembrane segments; EMP70 has a paralog, TMN2, that arose from the whole genome duplication	414	Transmembrane 9 superfamily member 1 OS=Saccharomyces cerevisiae (strain ATCC 204508 / S288c) GN=EMP70 PE=1 SV=2	TMN1_YEAST	76 kDa	TRUE	0.041	-0.09	14.341	0.25837	14.46	14.52	14.26	14.37	14.3	14.17	14.36	14.31	14.33	14.33
YLR096W	KIN2	12	332590	336033	W	serine/threonine protein kinase KIN2	Serine/threonine protein kinase involved in regulation of exocytosis; localizes to the cytoplasmic face of the plasma membrane; KIN2 has a paralog, KIN1, that arose from the whole genome duplication	689	Serine/threonine-protein kinase KIN2 OS=Saccharomyces cerevisiae (strain ATCC 204508 / S288c) GN=KIN2 PE=1 SV=3	KIN2_YEAST	128 kDa	TRUE	0.13	-0.09	13.046	0.470909	13.08	13.03	13.11	13.32	12.91	12.89	13.09	13.03	13.05	12.95
YLR200W	YKE2	12	549012	549356	W	tubulin-binding prefolding complex subunit YKE2|PFD6|GIM1	Subunit of the heterohexameric Gim/prefoldin protein complex; involved in the folding of alpha-tubulin, beta-tubulin, and actin; prefoldin complex also localizes to chromatin of actively transcribed genes in the nucleus and facilitates transcriptional elongation	1008	Prefoldin subunit 6 OS=Saccharomyces cerevisiae (strain ATCC 204508 / S288c) GN=YKE2 PE=1 SV=1	PFD6_YEAST	13 kDa	NA	0.24	-0.09	13.749	0.618507	13.88	13.87	13.71	13.7	13.7	13.48	14.22	13.61	13.68	13.64
YLR353W	BUD8	12	834352	836163	W		Protein involved in bud-site selection; diploid mutants display a unipolar budding pattern instead of the wild-type bipolar pattern, and bud at the proximal pole; BUD8 has a paralog, BUD9, that arose from the whole genome duplication	935	Bud site selection protein 8 OS=Saccharomyces cerevisiae (strain ATCC 204508 / S288c) GN=BUD8 PE=1 SV=2	BUD8_YEAST	66 kDa	TRUE	0.21	-0.09	12.174	0.586731	12.09	12.24	12.31	12.36	12.13	11.95	12.2	12.24	12.02	12.2
YML027W	YOX1	13	221406	222563	W		Homeobox transcriptional repressor; binds to Mcm1p and to early cell cycle boxes (ECBs) in the promoters of cell cycle-regulated genes expressed in M/G1 phase; expression is cell cycle-regulated; phosphorylated by Cdc28p; relocalizes from nucleus to cytoplasm upon DNA replication stress; YOX1 has a paralog, YHP1, that arose from the whole genome duplication	1259	Homeobox protein YOX1 OS=Saccharomyces cerevisiae (strain ATCC 204508 / S288c) GN=YOX1 PE=1 SV=2	YOX1_YEAST	43 kDa	NA	0.34	-0.09	13.165	0.701673	13.33	13.28	13.04	13.26	13.12	13.02	13.41	13.01	13.01	13.17
YMR261C	TPS3	13	790205	793369	C	trehalose 6-phosphate synthase/phosphatase complex subunit	Regulatory subunit of trehalose-6-phosphate synthase/phosphatase; involved in synthesis of storage carbohydrate trehalose; expression is induced by stress conditions and repressed by the Ras-cAMP pathway; TPS3 has a paralog, TSL1, that arose from the whole genome duplication	811	Trehalose synthase complex regulatory subunit TPS3 OS=Saccharomyces cerevisiae (strain ATCC 204508 / S288c) GN=TPS3 PE=1 SV=3	TPS3_YEAST	119 kDa	TRUE	0.17	-0.09	13.044	0.530482	12.93	12.76	13.35	13.23	13.18	12.92	12.79	13.02	13.24	13.02
YMR298W	LIP1	13	863819	864271	W	sphingosine N-acyltransferase subunit LIP1	Ceramide synthase subunit; single-span ER membrane protein associated with Lag1p and Lac1p and required for ceramide synthase activity, null mutant grows extremely slowly and is defective in ceramide synthesis	832	Ceramide synthase subunit LIP1 OS=Saccharomyces cerevisiae (strain ATCC 204508 / S288c) GN=LIP1 PE=1 SV=1	LIP1_YEAST	17 kDa	NA	0.17	-0.09	14.873	0.530482	15.02	15.09	14.83	14.94	14.8	14.99	14.41	14.85	14.92	14.88
YNL088W	TOP2	14	457704	461990	W	DNA topoisomerase 2|TRF3|TOR3	Topoisomerase II; relieves torsional strain in DNA by cleaving and re-sealing phosphodiester backbone of both positively and negatively supercoiled DNA; cleaves complementary strands; localizes to axial cores in meiosis; required for replication slow zone (RSZ) breakage following Mec1p inactivation; human homolog TOP2A implicated in cancers, and can complement yeast null mutant	2114	DNA topoisomerase 2 OS=Saccharomyces cerevisiae (strain ATCC 204508 / S288c) GN=TOP2 PE=1 SV=2	TOP2_YEAST	164 kDa	NA	0.75	-0.09	13.419	0.919309	13.18	13.14	14	13.55	13.56	13.23	13.17	13.36	13.61	13.39
YNL102W	POL1	14	430087	434493	W	DNA-directed DNA polymerase alpha catalytic subunit POL1|HPR3|CRT5|CDC17	Catalytic subunit of the DNA polymerase I alpha-primase complex; required for the initiation of DNA replication during mitotic DNA synthesis and premeiotic DNA synthesis	741	DNA polymerase alpha catalytic subunit A OS=Saccharomyces cerevisiae (strain ATCC 204508 / S288c) GN=POL1 PE=1 SV=2	DPOA_YEAST	167 kDa	NA	0.14	-0.09	12.791	0.488679	12.69	12.82	12.92	12.92	12.84	12.86	12.59	12.73	12.77	12.77
YNL271C	BNI1	14	129522	135383	C	formin BNI1|SHE5|PPF3	Formin; polarisome component; nucleates the formation of linear actin filaments, involved in cell processes such as budding and mitotic spindle orientation which require the formation of polarized actin cables; recruited to the division site in a Glc7p/Ref2p dependent manner following release of Bnr1p; functionally redundant with BNR1	721	Protein BNI1 OS=Saccharomyces cerevisiae (strain ATCC 204508 / S288c) GN=BNI1 PE=1 SV=3	BNI1_YEAST	220 kDa	NA	0.14	-0.09	12.114	0.488679	11.95	11.87	12.42	12.31	12.26	12.1	11.97	11.98	12.21	12.07
YOL004W	SIN3	15	316938	321548	W	transcriptional regulator SIN3|UME4|SDS16|SDI1|RPD1|GAM2|CPE1	Component of both the Rpd3S and Rpd3L histone deacetylase complexes; involved in transcriptional repression and activation of diverse processes, including mating-type switching and meiosis; involved in the maintenance of chromosomal integrity	824	Transcriptional regulatory protein SIN3 OS=Saccharomyces cerevisiae (strain ATCC 204508 / S288c) GN=SIN3 PE=1 SV=2	SIN3_YEAST	175 kDa	NA	0.17	-0.09	13.237	0.530482	13.23	13.02	13.46	13.45	13.26	13.05	13.41	13.12	13.21	13.16
YOL036W	YOL036W	15	256745	259030	W		Protein of unknown function; potential Cdc28p substrate; YOL036W has a paralog, YIR016W, that arose from the whole genome duplication	485	Uncharacterized protein YOL036W OS=Saccharomyces cerevisiae (strain ATCC 204508 / S288c) GN=YOL036W PE=1 SV=1	YO036_YEAST	84 kDa	NA	0.058	-0.09	11.813	0.311015	11.96	11.97	11.78	11.86	11.73	11.77	11.85	11.65	11.71	11.85
YOL087C	DUF1	15	155287	158637	C		Ubiquitin-binding protein of unknown function; contains one WD40 repeat in a beta-propeller fold; green fluorescent protein (GFP)-fusion protein localizes to the cytoplasm; homolog of human WDR48/UAF1, which is involved in regulating the Fanconi anemia pathway; deletion mutant is sensitive to various chemicals including phenanthroline, sanguinarine, and nordihydroguaiaretic acid	1391	Uncharacterized WD repeat-containing protein YOL087C OS=Saccharomyces cerevisiae (strain ATCC 204508 / S288c) GN=YOL087C PE=1 SV=1	YO087_YEAST	125 kDa	NA	0.4	-0.09	12.362	0.743185	12.36	12.31	12.38	12.76	12.21	12.24	12.56	12.31	12.18	12.31
YOR290C	SNF2	15	855147	860258	C	SWI/SNF catalytic subunit SNF2|TYE3|SWI2|HAF1|GAM1	Catalytic subunit of the SWI/SNF chromatin remodeling complex; involved in transcriptional regulation; contains DNA-stimulated ATPase activity; functions interdependently in transcriptional activation with Snf5p and Snf6p	706	Transcription regulatory protein SNF2 OS=Saccharomyces cerevisiae (strain ATCC 204508 / S288c) GN=SNF2 PE=1 SV=1	SNF2_YEAST	194 kDa	TRUE	0.13	-0.09	13.574	0.470909	13.6	13.53	13.7	13.66	13.64	13.56	13.44	13.46	13.57	13.58
YOR294W	RRS1	15	868340	868951	W		Essential protein that binds ribosomal protein L11; required for nuclear export of the 60S pre-ribosomal subunit during ribosome biogenesis; localizes to the nucleolus and in foci along nuclear periphery; cooperates with Ebp2p and Mps3p to mediate telomere clustering by binding Sir4p, but is not involved in telomere tethering; mouse homolog shows altered expression in Huntington's disease model m…	2152	Regulator of ribosome biosynthesis OS=Saccharomyces cerevisiae (strain ATCC 204508 / S288c) GN=RRS1 PE=1 SV=1	RRS1_YEAST	23 kDa	NA	0.76	-0.09	14.349	0.921536	14.43	14.57	14.29	14.29	14.25	13.94	14.97	14.33	14.11	14.31
YPL259C	APM1	16	51244	52671	C	YAP54	Mu1-like medium subunit of the AP-1 complex; binds clathrin; involved in clathrin-dependent Golgi protein sorting; the AP-1 complex is the clathrin-associated protein complex	1000	AP-1 complex subunit mu-1-I OS=Saccharomyces cerevisiae (strain ATCC 204508 / S288c) GN=APM1 PE=1 SV=2	AP1M1_YEAST	54 kDa	NA	0.24	-0.09	13.237	0.618507	13.28	13.28	13.39	13.32	13.24	13.21	13.09	12.96	13.25	13.35
YAR018C	KIN3	1	170396	171703	C	serine/threonine protein kinase KIN3|NPK1|FUN52	Nonessential serine/threonine protein kinase; possible role in DNA damage response; influences tolerance to high levels of ethanol	1130	Serine/threonine-protein kinase KIN3 OS=Saccharomyces cerevisiae (strain ATCC 204508 / S288c) GN=KIN3 PE=3 SV=2	KIN3_YEAST	51 kDa	NA	0.29	-0.08	11.653	0.662346	11.71	11.74	11.67	11.62	11.71	11.75	11.59	11.62	11.42	11.7
YBR015C	MNN2	2	267710	269503	C	alpha-1,2-mannosyltransferase MNN2|LDB8|CRV4|TTP1	Alpha-1,2-mannosyltransferase; responsible for addition of the first alpha-1,2-linked mannose to form the branches on the mannan backbone of oligosaccharides, localizes to an early Golgi compartment	671	Alpha-1,2-mannosyltransferase MNN2 OS=Saccharomyces cerevisiae (strain ATCC 204508 / S288c) GN=MNN2 PE=1 SV=1	MNN2_YEAST	68 kDa	NA	0.12	-0.08	11.832	0.456388	11.74	11.63	12.26	11.86	11.93	11.75	11.57	11.69	12	11.89
YBR135W	CKS1	2	504854	505306	W	cyclin-dependent protein kinase regulatory subunit CKS1	Cyclin-dependent protein kinase regulatory subunit and adaptor; interacts with Cdc28p (aka Cdk1p); required for G1/S and G2/M phase transitions and budding; mediates phosphorylation and degradation of Sic1p; modulates proteolysis of M-phase targets through interactions with the proteasome; role in transcriptional regulation, recruiting proteasomal subunits to target gene promoters; human homologs…	1611	Cyclin-dependent kinases regulatory subunit OS=Saccharomyces cerevisiae (strain ATCC 204508 / S288c) GN=CKS1 PE=1 SV=1	CKS1_YEAST	18 kDa	NA	0.51	-0.08	13.417	0.821966	13.52	13.67	13.32	13.39	13.33	13.19	13.69	13.36	13.5	13.2
YBR189W	RPS9B	2	604508	605508	W	ribosomal 40S subunit protein S9B|rp21|YS11|S9B|S4|S13|SUP46|RPS13A	Protein component of the small (40S) ribosomal subunit; homologous to mammalian ribosomal protein S9 and bacterial S4; RPS9B has a paralog, RPS9A, that arose from the whole genome duplication	2499	Cluster of 40S ribosomal protein S9-B OS=Saccharomyces cerevisiae (strain ATCC 204508 / S288c) GN=RPS9B PE=1 SV=4 (RS9B_YEAST)	RS9B_YEAST [2]	22 kDa	TRUE	0.94	-0.08	9.641	0.976966	9.49	9.84	9.77	9.84	9.2	9.53	10.47	9.31	9.09	9.87
YBR265W	TSC10	2	738582	739544	W	3-dehydrosphinganine reductase	3-ketosphinganine reductase; catalyzes the second step in phytosphingosine synthesis; essential for growth in the absence of exogenous dihydrosphingosine or phytosphingosine; localized to lipid droplets; member of short chain dehydrogenase/reductase protein family	602	3-ketodihydrosphingosine reductase TSC10 OS=Saccharomyces cerevisiae (strain ATCC 204508 / S288c) GN=TSC10 PE=1 SV=2	TSC10_YEAST	36 kDa	NA	0.095	-0.08	12.995	0.412144	13.01	12.93	13.12	13.12	13.11	13.08	12.64	12.85	12.98	13.11
YBR275C	RIF1	2	751356	757106	C	DNA-binding protein RIF1	Protein that binds to the Rap1p C-terminus; acts synergistically with Rif2p to help control telomere length and establish telomeric silencing; involved in control of DNA replication; contributes to resection of DNA double strand breaks (DSBs); deletion results in telomere elongation	915	Telomere length regulator protein RIF1 OS=Saccharomyces cerevisiae (strain ATCC 204508 / S288c) GN=RIF1 PE=1 SV=3	RIF1_YEAST	218 kDa	NA	0.21	-0.08	12.925	0.586731	13	12.94	13.11	12.88	12.9	12.89	12.85	12.79	13.03	12.86
YCR036W	RBK1	3	193297	194298	W	putative ribokinase	Putative ribokinase	948	Probable ribokinase OS=Saccharomyces cerevisiae (strain ATCC 204508 / S288c) GN=RBK1 PE=1 SV=2	RBSK_YEAST	37 kDa	NA	0.22	-0.08	14.484	0.594161	14.62	14.74	14.34	14.48	14.46	14.49	14.2	14.49	14.44	14.58
YDL040C	NAT1	4	378874	381438	C	peptide alpha-N-acetyltransferase complex A subunit NAT1|NAA15|AAA1	Subunit of protein N-terminal acetyltransferase NatA; NatA comprised of Nat1p, Ard1p, and Nat5p; N-terminally acetylates many proteins to influence multiple processes such as cell cycle progression, heat-shock resistance, mating, sporulation, telomeric silencing and early stages of mitophagy; orthologous to human NAA15; expression of both human NAA10 and NAA15 functionally complements ard1 nat1 d…	726	N-terminal acetyltransferase A complex subunit NAT1 OS=Saccharomyces cerevisiae (strain ATCC 204508 / S288c) GN=NAT1 PE=1 SV=2	NAT1_YEAST	99 kDa	NA	0.14	-0.08	13.754	0.488679	13.55	13.4	14.16	13.89	14	13.87	13.46	13.64	13.89	13.68
YDL061C	RPS29B	4	340628	340798	C	uS14|ribosomal 40S subunit protein S29B|S14|YS29|S36B|S29B|YS29B	Protein component of the small (40S) ribosomal subunit; homologous to mammalian ribosomal protein S29 and bacterial S14; RPS29B has a paralog, RPS29A, that arose from the whole genome duplication	641	40S ribosomal protein S29-B OS=Saccharomyces cerevisiae (strain ATCC 204508 / S288c) GN=RPS29B PE=1 SV=3	RS29B_YEAST	7 kDa	NA	0.11	-0.08	16.603	0.438983	16.77	16.83	16.49	16.64	16.51	16.48	16.49	16.58	16.71	16.53
YDR011W	SNQ2	4	465919	470424	W	ATP-binding cassette transporter SNQ2	Plasma membrane ATP-binding cassette (ABC) transporter; multidrug transporter involved in multidrug resistance and resistance to singlet oxygen species	1358	Protein SNQ2 OS=Saccharomyces cerevisiae (strain ATCC 204508 / S288c) GN=SNQ2 PE=1 SV=2	SNQ2_YEAST	169 kDa	TRUE	0.38	-0.08	15.134	0.729577	15.22	14.92	15.33	15.21	15.18	15.02	15.08	15.04	15.24	15.1
YDR062W	LCB2	4	576474	578159	W	serine C-palmitoyltransferase LCB2|TSC1|SCS1	Component of serine palmitoyltransferase; responsible along with Lcb1p for the first committed step in sphingolipid synthesis, which is the condensation of serine with palmitoyl-CoA to form 3-ketosphinganine	1500	Serine palmitoyltransferase 2 OS=Saccharomyces cerevisiae (strain ATCC 204508 / S288c) GN=LCB2 PE=1 SV=1	LCB2_YEAST	63 kDa	NA	0.45	-0.08	13.22	0.78169	13.14	12.83	13.68	13.39	13.28	13.12	13.05	13.03	13.4	13.28
YDR067C	OCA6	4	582791	583465	C	protein-tyrosine-phosphatase	Cytoplasmic protein required for replication of Brome mosaic virus; S. cerevisiae is a model system for studying positive-strand RNA virus replication; null mutation confers sensitivity to tunicamycin and DTT	1096	Putative tyrosine-protein phosphatase OCA6 OS=Saccharomyces cerevisiae (strain ATCC 204508 / S288c) GN=OCA6 PE=1 SV=1	OCA6_YEAST	26 kDa	NA	0.27	-0.08	11.173	0.64333	11.29	11.29	11.16	11.09	11.2	11	11.37	11.26	10.92	11.15
YDR107C	TMN2	4	669016	671034	C		Protein with a role in cellular adhesion and filamentous growth; similar to Tmn3p; member of the evolutionarily conserved Transmembrane Nine family of proteins with nine membrane-spanning segments; TMN2 has a paralog, EMP70, that arose from the whole genome duplication	1196	Transmembrane 9 superfamily member 2 OS=Saccharomyces cerevisiae (strain ATCC 204508 / S288c) GN=TMN2 PE=1 SV=1	TMN2_YEAST	76 kDa	TRUE	0.32	-0.08	13.417	0.685525	13.58	13.59	13.39	13.32	13.44	13.2	13.58	13.25	13.34	13.48
YDR174W	HMO1	4	812110	812850	W	HSM2	Chromatin associated high mobility group (HMG) family member; involved in compacting, bending, bridging and looping DNA; rDNA-binding component that regulates transcription from RNA polymerase I promoters; regulates start site selection of ribosomal protein genes via RNA polymerase II promoters; role in genome maintenance; associates with a 5'-3' DNA helicase and Fpr1p, a prolyl isomerase; reloca…	837	High mobility group protein 1 OS=Saccharomyces cerevisiae (strain ATCC 204508 / S288c) GN=HMO1 PE=1 SV=1	HMO1_YEAST	28 kDa	TRUE	0.17	-0.08	13.235	0.530482	13.37	13.45	13.12	13.3	13.09	13.22	13.22	13.2	13.21	13.17
YDR280W	RRP45	4	1020747	1021664	W	exosome non-catalytic core subunit RRP45	Exosome non-catalytic core component; involved in 3'-5' RNA processing and degradation in both the nucleus and the cytoplasm; has similarity to E. coli RNase PH and to human hRrp45p (PM/SCL-75, EXOSC9); protein abundance increases in response to DNA replication stress	605	Exosome complex component RRP45 OS=Saccharomyces cerevisiae (strain ATCC 204508 / S288c) GN=RRP45 PE=1 SV=1	RRP45_YEAST	34 kDa	NA	0.096	-0.08	13.408	0.413023	13.49	13.55	13.32	13.48	13.35	13.22	13.65	13.31	13.35	13.36
YDR293C	SSD1	4	1045640	1049392	C	mRNA-binding translational repressor SSD1|SRK1|RLT1|MCS1|CLA1	Translational repressor with a role in polar growth and wall integrity; regulated by Cbk1p phosphorylation to effect bud-specific translational control and localization of specific mRNAs; interacts with TOR pathway components; contains a functional N-terminal nuclear localization sequence and nucleocytoplasmic shuttling appears to be critical to Ssd1p function	801	Protein SSD1 OS=Saccharomyces cerevisiae (strain ATCC 204508 / S288c) GN=SSD1 PE=1 SV=1	SSD1_YEAST	140 kDa	NA	0.16	-0.08	13.182	0.51995	13.08	12.99	13.48	13.29	13.3	13.21	12.92	13.16	13.3	13.09
YDR335W	MSN5	4	1141168	1144842	W	karyopherin MSN5|STE21|KAP142	Karyopherin; involved in nuclear import and export of proteins, including import of replication protein A and export of Far1p and transcription factors Swi5p, Swi6p, Msn2p, and Pho4p; required for re-export of mature tRNAs after their retrograde import from the cytoplasm; exportin-5 homolog	1743	Protein MSN5 OS=Saccharomyces cerevisiae (strain ATCC 204508 / S288c) GN=MSN5 PE=1 SV=1	MSN5_YEAST	142 kDa	NA	0.58	-0.08	12.992	0.85791	12.88	12.39	13.88	13.18	12.92	12.84	12.91	12.51	13.43	12.98
YDR341C	YDR341C	4	1151803	1153626	C	arginine--tRNA ligase|ArgRS|RRS1	Arginyl-tRNA synthetase; the authentic, non-tagged protein is detected in highly purified mitochondria in high-throughput studies; YDR341C has a paralog, MSR1, that arose from the whole genome duplication	687	Arginine--tRNA ligase, cytoplasmic OS=Saccharomyces cerevisiae (strain ATCC 204508 / S288c) GN=YDR341C PE=1 SV=1	SYRC_YEAST	70 kDa	TRUE	0.13	-0.08	14.943	0.470909	14.66	14.48	15.41	15.1	15.28	15.22	14.41	14.82	15.19	14.86
YDR500C	RPL37B	4	1450198	1450853	C	eL37|ribosomal 60S subunit protein L37B|L37e|YL35|L43|L37B	Ribosomal 60S subunit protein L37B; required for processing of 27SB pre-rRNA and formation of stable 66S assembly intermediates; protein abundance increases in response to DNA replication stress; homologous to mammalian ribosomal protein L37, no bacterial homolog; RPL37B has a paralog, RPL37A, that arose from the whole genome duplication	835	60S ribosomal protein L37-B OS=Saccharomyces cerevisiae (strain ATCC 204508 / S288c) GN=RPL37B PE=1 SV=2	RL37B_YEAST	10 kDa	TRUE	0.17	-0.08	14.291	0.530482	14.42	14.55	14.21	14.34	14.13	14.15	14.34	14.29	14.33	14.15
YER125W	RSP5	5	410189	412618	W	NEDD4 family E3 ubiquitin-protein ligase|SMM1|UBY1|NPI1|MUT2|MDP1	NEDD4 family E3 ubiquitin ligase; regulates processes including: MVB sorting, the heat shock response, transcription, endocytosis and ribosome stability; ubiquitinates Sec23p, Sna3p, Ste4p, Nfi1p, Rpo21p and Sem1p; autoubiquitinates; deubiquitinated by Ubp2p; regulated by SUMO ligase Siz1p, in turn regulates Siz1p SUMO ligase activity; required for efficient Golgi-to-ER trafficking in COPI mutant…	630	E3 ubiquitin-protein ligase RSP5 OS=Saccharomyces cerevisiae (strain ATCC 204508 / S288c) GN=RSP5 PE=1 SV=1	RSP5_YEAST	92 kDa	NA	0.11	-0.08	13.881	0.438983	13.84	13.86	14.07	13.93	13.93	13.9	13.78	13.78	13.91	13.81
YER172C	BRR2	5	529530	536021	C	ATP-dependent RNA helicase BRR2|PRP44|SNU246|SLT22|RSS1	RNA-dependent ATPase RNA helicase (DEIH box); required for disruption of U4/U6 base-pairing in native snRNPs to activate the spliceosome for catalysis; homologous to human U5-200kD	1327	Pre-mRNA-splicing helicase BRR2 OS=Saccharomyces cerevisiae (strain ATCC 204508 / S288c) GN=BRR2 PE=1 SV=2	BRR2_YEAST	246 kDa	NA	0.37	-0.08	12.472	0.725985	12.43	12.46	12.75	12.45	12.47	12.51	12.47	12.35	12.41	12.42
YFL004W	VTC2	6	131810	134296	W	vacuolar transporter chaperone|PHM1	Regulatory subunit of the vacuolar transporter chaperone (VTC) complex; involved in membrane trafficking, vacuolar polyphosphate accumulation, microautophagy and non-autophagic vacuolar fusion; VTC2 has a paralog, VTC3, that arose from the whole genome duplication	432	Vacuolar transporter chaperone 2 OS=Saccharomyces cerevisiae (strain ATCC 204508 / S288c) GN=VTC2 PE=1 SV=1	VTC2_YEAST	95 kDa	TRUE	0.045	-0.08	13.76	0.271047	13.7	13.49	14.06	13.84	13.91	13.64	13.73	13.66	13.77	13.8
YFL005W	SEC4	6	130334	130981	W	Rab family GTPase SEC4|SRO6	Rab family GTPase; essential for vesicle-mediated exocytic secretion and autophagy; associates with the exocyst component Sec15p and may regulate polarized delivery of transport vesicles to the exocyst at the plasma membrane	548	Ras-related protein SEC4 OS=Saccharomyces cerevisiae (strain ATCC 204508 / S288c) GN=SEC4 PE=1 SV=1	SEC4_YEAST	24 kDa	NA	0.076	-0.08	13.816	0.361838	13.7	13.73	14.16	13.92	13.82	13.86	13.65	13.61	13.96	13.75
YFL034W	MIL1	6	65477	68698	W		Predicted lipase; binds variant medium clathrin chain Apm2p and contributes to its membrane recruitment; putative integral membrane protein that interacts with Rpp0p component of ribosomal stalk	1547	Uncharacterized membrane protein YFL034W OS=Saccharomyces cerevisiae (strain ATCC 204508 / S288c) GN=YFL034W PE=1 SV=2	YFD4_YEAST	120 kDa	NA	0.48	-0.08	11.193	0.8	11.16	11.1	11.25	11.43	11.19	11.33	11.51	10.91	11.11	10.94
YFL038C	YPT1	6	55366	55986	C	Rab family GTPase YPT1|YP2	Rab family GTPase; involved in the ER-to-Golgi step of the secretory pathway; complex formation with the Rab escort protein Mrs6p is required for prenylation of Ypt1p by type II protein geranylgeranyltransferase (Bet2p-Bet4p); binds to unspliced HAC1 mRNA; regulates the unfolded protein response (UPR) by promoting the decay of HAC1 RNA; localizes to the early Golgi, the transitional Golgi and ER …	372	GTP-binding protein YPT1 OS=Saccharomyces cerevisiae (strain ATCC 204508 / S288c) GN=YPT1 PE=1 SV=2	YPT1_YEAST	23 kDa	NA	0.033	-0.08	13.693	0.229758	13.58	13.49	14.07	13.82	13.78	13.72	13.53	13.51	13.86	13.57
YFR011C	MIC19	6	166746	167258	C	AIM13|MCS19	Component of the MICOS complex; MICOS (formerly MINOS or MitOS) is a mitochondrial inner membrane complex that extends into the intermembrane space and has a role in the maintenance of crista junctions, inner membrane architecture, and formation of contact sites to the outer membrane; Mic19p is peripheral to the inner membrane and may connect Mic60p with the Mic10p-Mic12p-Mic27p subcomplex; both …	634	MICOS complex subunit MIC19 OS=Saccharomyces cerevisiae (strain ATCC 204508 / S288c) GN=MIC19 PE=1 SV=1	MIC19_YEAST	19 kDa	NA	0.11	-0.08	14.912	0.438983	15.08	15.1	14.82	14.9	14.8	14.78	15.13	14.87	14.85	14.79
YFR040W	SAP155	6	234242	237250	W		Protein required for function of the Sit4p protein phosphatase; forms a complex with Sit4p; member of a family of similar proteins including Sap4p, Sap185p, and Sap190p; protein abundance increases in response to DNA replication stress; SAP155 has a paralog, SAP4, that arose from the whole genome duplication	961	SIT4-associating protein SAP155 OS=Saccharomyces cerevisiae (strain ATCC 204508 / S288c) GN=SAP155 PE=1 SV=4	SA155_YEAST	115 kDa	NA	0.22	-0.08	13.002	0.594161	13.05	12.97	13.06	13.01	13.14	13.03	12.92	12.91	13.02	12.91
YHR040W	BCD1	8	187924	189024	W		Essential protein required for the accumulation of box C/D snoRNA	1056	Box C/D snoRNA protein 1 OS=Saccharomyces cerevisiae (strain ATCC 204508 / S288c) GN=BCD1 PE=1 SV=1	BCD1_YEAST	42 kDa	TRUE	0.26	-0.08	11.805	0.635283	11.84	12	11.7	11.89	11.8	11.56	11.92	11.79	11.72	11.83
YHR104W	GRE3	8	323409	324392	W	trifunctional aldehyde reductase/xylose reductase/glucose 1-dehydrogenase (NADP(+))	Aldose reductase; involved in methylglyoxal, d-xylose, arabinose, and galactose metabolism; stress induced (osmotic, ionic, oxidative, heat shock, starvation and heavy metals); regulated by the HOG pathway; protein abundance increases in response to DNA replication stress	201	NADPH-dependent aldose reductase GRE3 OS=Saccharomyces cerevisiae (strain ATCC 204508 / S288c) GN=GRE3 PE=1 SV=1	GRE3_YEAST	37 kDa	NA	0.0051	-0.08	14.795	0.0667121	14.9	14.97	14.75	14.76	14.8	14.74	14.65	14.77	14.79	14.82
YHR149C	SKG6	8	394455	396659	C		Integral membrane protein; localizes primarily to growing sites such as the bud tip or the cell periphery; potential Cdc28p substrate; Skg6p interacts with Zds1p and Zds2p; SKG6 has a paralog, TOS2, that arose from the whole genome duplication	2094	Protein SKG6 OS=Saccharomyces cerevisiae (strain ATCC 204508 / S288c) GN=SKG6 PE=1 SV=2	SKG6_YEAST	82 kDa	NA	0.73	-0.08	12.078	0.910303	12.15	12.12	12.1	12.29	11.94	12	12.07	12.01	12.04	12.06
YHR206W	SKN7	8	512732	514600	W	kinase-regulated stress-responsive transcription factor SKN7|POS9|BRY1	Nuclear response regulator and transcription factor; physically interacts with the Tup1-Cyc8 complex and recruits Tup1p to its targets; part of a branched two-component signaling system; required for optimal induction of heat-shock genes in response to oxidative stress; involved in osmoregulation; relocalizes to the cytosol in response to hypoxia; SKN7 has a paralog, HMS2, that arose from the who…	557	Transcription factor SKN7 OS=Saccharomyces cerevisiae (strain ATCC 204508 / S288c) GN=SKN7 PE=1 SV=1	SKN7_YEAST	69 kDa	NA	0.08	-0.08	12.771	0.374684	12.88	12.91	12.68	12.66	12.97	12.78	12.36	12.84	12.7	12.93
YJL055W	YJL055W	10	333357	334094	W		Putative protein of unknown function; functions together with HAM1 to mediate resistance to 5-FU; specifically reduces the incorporation of 5-FU into RNA, without affecting uptake or incorporation of uracil into RNA; proposed to be involved in the metabolism of purine and pyrimidine base analogues; deletion mutants are sensitive to HAP and AHA	1154	LOG family protein YJL055W OS=Saccharomyces cerevisiae (strain ATCC 204508 / S288c) GN=YJL055W PE=1 SV=1	YJF5_YEAST	27 kDa	TRUE	0.3	-0.08	11.068	0.669251	11.18	11.25	10.98	11.09	11.03	10.91	11.34	11.06	10.89	10.95
YJR060W	CBF1	10	548759	549814	W	GFII|CP1|CPF1|CEP1	Basic helix-loop-helix (bHLH) protein; forms homodimer to bind E-box consensus sequence CACGTG present at MET gene promoters and centromere DNA element I (CDEI); affects nucleosome positioning at this motif; associates with other transcription factors such as Met4p and Isw1p to mediate transcriptional activation or repression; associates with kinetochore proteins, required for chromosome segregat…	738	Centromere-binding protein 1 OS=Saccharomyces cerevisiae (strain ATCC 204508 / S288c) GN=CBF1 PE=1 SV=2	CBF1_YEAST	39 kDa	NA	0.14	-0.08	13.833	0.488679	13.93	13.93	13.77	13.89	13.78	13.61	14.17	13.79	13.73	13.73
YJR096W	YJR096W	10	611195	612043	W	aldo-keto reductase superfamily protein	Xylose and arabinose reductase; member of the aldo-keto reductase (AKR) family; GFP-fusion protein is induced in response to the DNA-damaging agent MMS	335	Uncharacterized oxidoreductase YJR096W OS=Saccharomyces cerevisiae (strain ATCC 204508 / S288c) GN=YJR096W PE=1 SV=1	YJ66_YEAST	32 kDa	TRUE	0.025	-0.08	13.999	0.19503	14.08	14.2	13.97	14.03	13.91	13.84	14.11	13.95	13.91	13.99
YJR104C	SOD1	10	622550	623014	C	superoxide dismutase SOD1|CRS4	Cytosolic copper-zinc superoxide dismutase; detoxifies superoxide; stabilizes Yck1p and Yck2p kinases in glucose to repress respiration; phosphorylated by Dun1p, enters nucleus under oxidative stress to promote transcription of stress response genes; human ortholog SOD1 implicated in ALS complements a null allele; abundance increases under DNA replication stress and during exposure to boric acid;…	1297	Superoxide dismutase [Cu-Zn] OS=Saccharomyces cerevisiae (strain ATCC 204508 / S288c) GN=SOD1 PE=1 SV=2	SODC_YEAST	16 kDa	NA	0.36	-0.08	14.14	0.720556	14.24	14.32	14.06	14.16	14.02	13.93	14.5	14.05	14.17	13.95
YKL053C-A	MDM35	11	339182	339442	C		Mitochondrial intermembrane space protein; forms complex with Ups2p that transfers phosphatidylserine from outer membrane to inner membrane for phosphatidylethanolamine synthesis; mutation affects mitochondrial distribution and morphology; contains twin cysteine-x9-cysteine motifs; protein abundance increases in response to DNA replication stress	2207	Mitochondrial distribution and morphology protein 35 OS=Saccharomyces cerevisiae (strain ATCC 204508 / S288c) GN=MDM35 PE=1 SV=3	MDM35_YEAST	10 kDa	NA	0.79	-0.08	14.286	0.93643	14.41	14.38	14.34	14.2	14.27	14.02	14.4	14.27	14.39	14.18
YKL095W	YJU2	11	262277	263113	W	mRNA splicing protein YJU2|CWC16	Essential protein required for pre-mRNA splicing; associates transiently with the spliceosomal NTC ("nineteen complex") and acts after Prp2p to promote the first catalytic reaction of splicing	1308	Protein CWC16 OS=Saccharomyces cerevisiae (strain ATCC 204508 / S288c) GN=YJU2 PE=1 SV=1	CWC16_YEAST	32 kDa	NA	0.37	-0.08	12.639	0.725985	12.68	12.82	12.67	12.73	12.46	12.41	12.9	12.61	12.55	12.56
YKR082W	NUP133	11	592825	596298	W	RAT3	Subunit of Nup84p subcomplex of nuclear pore complex (NPC); contributes to nucleocytoplasmic transport, NPC biogenesis; is involved in establishment of a normal nucleocytoplasmic concentration gradient of GTPase Gsp1p; also plays roles in several processes that may require localization of genes or chromosomes at nuclear periphery, including double-strand break repair, transcription and chromatin …	640	Nucleoporin NUP133 OS=Saccharomyces cerevisiae (strain ATCC 204508 / S288c) GN=NUP133 PE=1 SV=1	NU133_YEAST	133 kDa	NA	0.11	-0.08	13.912	0.438983	13.78	13.75	14.22	14.02	14.08	13.92	13.62	13.88	14	13.85
YLR178C	TFS1	12	513162	513821	C	DKA1	Inhibitor of carboxypeptidase Y (Prc1p), and Ras GAP (Ira2p); phosphatidylethanolamine-binding protein (PEBP) family member and ortholog of hPEBP1/RKIP, a natural metastasis suppressor; targets to vacuolar membranes during stationary phase; acetylated by NatB N-terminal acetyltransferase; protein abundance increases in response to DNA replication stress	771	Carboxypeptidase Y inhibitor OS=Saccharomyces cerevisiae (strain ATCC 204508 / S288c) GN=TFS1 PE=1 SV=2	CPYI_YEAST	24 kDa	NA	0.15	-0.08	14.474	0.507843	14.66	14.87	14.46	14.34	14.36	14.46	14.53	14.23	14.37	14.46
YLR199C	PBA1	12	547853	548769	C	POC1	Protein involved in 20S proteasome assembly; forms a heterodimer with Add66p that binds to proteasome precursors; interaction with Pba1p-Add66p may affect function of the mature proteasome and its role in maintaining respiratory metabolism; similar to human PAC1 constituent of the PAC1-PAC2 complex involved in proteasome assembly	383	Proteasome chaperone 1 OS=Saccharomyces cerevisiae (strain ATCC 204508 / S288c) GN=PBA1 PE=1 SV=2	POC1_YEAST	31 kDa	NA	0.034	-0.08	13.7	0.230524	13.77	13.84	13.6	13.73	13.76	13.74	13.54	13.64	13.68	13.7
YLR215C	CDC123	12	570776	571858	C	cell proliferation protein CDC123	Assembly factor for the eIF2 translation initiation factor complex; regulates translational initiation; conserved residues of this ATP-Grasp protein that bind to ATP-Mg2+ in the pombe ortholog are required for complex assembly in budding yeast; interaction with eIF2 subunit Gcd11p facilitates complex assembly and activity; required for the START transition and timely progression through G2; regul…	1206	Cell division cycle protein 123 OS=Saccharomyces cerevisiae (strain ATCC 204508 / S288c) GN=CDC123 PE=1 SV=1	CD123_YEAST	42 kDa	NA	0.32	-0.08	13.408	0.685525	13.48	13.57	13.43	13.41	13.29	13.25	13.55	13.37	13.39	13.34
YLR219W	MSC3	12	574151	576337	W		Protein of unknown function; green fluorescent protein (GFP)-fusion protein localizes to the cell periphery; msc3 mutants are defective in directing meiotic recombination events to homologous chromatids; potential Cdc28p substrate; protein abundance increases in response to DNA replication stress	505	Meiotic sister-chromatid recombination protein 3 OS=Saccharomyces cerevisiae (strain ATCC 204508 / S288c) GN=MSC3 PE=1 SV=1	MSC3_YEAST	81 kDa	NA	0.064	-0.08	13.387	0.330858	13.4	13.42	13.48	13.35	13.46	13.49	13.31	13.34	13.22	13.4
YLR293C	GSP1	12	720771	721430	C	Ran GTPase GSP1|CST17|CNR1	Ran GTPase; GTP binding protein (mammalian Ranp homolog) involved in the maintenance of nuclear organization, RNA processing and transport; regulated by Srm1p, Rna1p, Yrb1p, Yrb2p, Yrp4p, Yrb30p, Cse1p and Kap95p; GSP1 has a paralog, GSP2, that arose from the whole genome duplication	635	GTP-binding nuclear protein GSP1/CNR1 OS=Saccharomyces cerevisiae (strain ATCC 204508 / S288c) GN=GSP1 PE=1 SV=1	GSP1_YEAST (+1)	25 kDa	NA	0.11	-0.08	14.426	0.438983	14.56	14.66	14.31	14.41	14.34	14.28	14.63	14.32	14.36	14.39
YLR410W	VIP1	12	937541	940981	W	inositol polyphosphate kinase VIP1	Inositol hexakisphosphate and inositol heptakisphosphate kinase; inositol heptakisphosphate (IP7) production is important for phosphate signaling; involved in cortical actin cytoskeleton function, and invasive pseudohyphal growth analogous to S. pombe asp1; inositol hexakisphosphate is also known as IP6	531	Inositol hexakisphosphate and diphosphoinositol-pentakisphosphate kinase OS=Saccharomyces cerevisiae (strain ATCC 204508 / S288c) GN=VIP1 PE=1 SV=1	VIP1_YEAST	130 kDa	NA	0.073	-0.08	12.794	0.356736	12.69	12.6	13.1	12.91	12.97	12.83	12.53	12.71	12.96	12.64
YMR184W	ADD37	13	628189	628785	W		Protein of unknown function; involved in ER-associated protein degradation; green fluorescent protein (GFP)-fusion protein localizes to the cytoplasm and is induced in response to the DNA-damaging agent MMS; YMR184W is not an essential gene; protein abundance increases in response to DNA replication stress	995	Alpha1-proteinase inhibitor-degradation deficient protein 37 OS=Saccharomyces cerevisiae (strain ATCC 204508 / S288c) GN=ADD37 PE=1 SV=1	ADD37_YEAST	22 kDa	NA	0.24	-0.08	11.669	0.618507	11.89	11.85	11.55	11.73	11.5	11.52	11.86	11.65	11.54	11.6
YMR270C	RRN9	13	805326	806423	C		Protein involved in promoting high level transcription of rDNA; subunit of UAF (upstream activation factor) for RNA polymerase I	1707	RNA polymerase I-specific transcription initiation factor RRN9 OS=Saccharomyces cerevisiae (strain ATCC 204508 / S288c) GN=RRN9 PE=1 SV=1	RRN9_YEAST	43 kDa	NA	0.56	-0.08	12.481	0.855189	12.54	12.59	12.43	12.46	12.54	12.29	12.71	12.39	12.34	12.52
YNL015W	PBI2	14	605384	605611	W	IB2|I2B|LMA1	Cytosolic inhibitor of vacuolar proteinase B (PRB1); required for efficient vacuole inheritance; with thioredoxin forms protein complex LMA1, which assists in priming SNARE molecules and promotes vacuole fusion; protein abundance increases in response to DNA replication stress	2512	Protease B inhibitor 2 OS=Saccharomyces cerevisiae (strain ATCC 204508 / S288c) GN=PBI2 PE=1 SV=1	IPB2_YEAST	9 kDa	NA	0.94	-0.08	14.743	0.976966	14.77	14.75	14.89	14.69	14.61	14.44	15.39	14.7	14.77	14.42
YNL068C	FKH2	14	495701	498289	C	forkhead family transcription factor FKH2	Forkhead family transcription factor; rate-limiting activator of replication origins; evolutionarily conserved regulator of lifespan; binds multiple chromosomal elements with distinct specificities, cell cycle dynamics; positively regulates transcriptional elongation; facilitates clustering, activation of early-firing replication origins; negative role in chromatin silencing at HML and HMR; major…	716	Fork head protein homolog 2 OS=Saccharomyces cerevisiae (strain ATCC 204508 / S288c) GN=FKH2 PE=1 SV=1	FKH2_YEAST	94 kDa	TRUE	0.13	-0.08	12.409	0.470909	12.43	12.44	12.5	12.51	12.35	12.24	12.76	12.36	12.19	12.31
YNL161W	CBK1	14	332597	334867	W	serine/threonine protein kinase CBK1	Serine/threonine protein kinase of the the RAM signaling network; Ndr/LATS family member; binds regulatory subunit Mob2p; involved in regulation of cellular morphogenesis, polarized growth, and septum destruction; phosphorylation by Cbk1p regulates localization and activity of Ace2p transcription factor and Ssd1p translational repressor; Cbk1p activity is regulated by both phosphorylation and spe…	1880	Serine/threonine-protein kinase CBK1 OS=Saccharomyces cerevisiae (strain ATCC 204508 / S288c) GN=CBK1 PE=1 SV=1	CBK1_YEAST	87 kDa	NA	0.64	-0.08	11.158	0.879112	11.21	10.76	11.39	11.26	11.31	11.12	11.32	11.01	11.2	11
YNL215W	IES2	14	244468	245430	W		Protein that associates with the INO80 chromatin remodeling complex; associates with the INO80 complex under low-salt conditions; essential for growth under anaerobic conditions; protein abundance increases in response to DNA replication stress	1868	Ino eighty subunit 2 OS=Saccharomyces cerevisiae (strain ATCC 204508 / S288c) GN=IES2 PE=1 SV=1	IES2_YEAST	36 kDa	NA	0.64	-0.08	13.722	0.879112	13.94	13.9	13.49	13.79	13.63	13.32	14.19	13.58	13.67	13.71
YNL260C	LTO1	14	156859	157455	C	ribosome biosynthesis protein LTO1	Essential protein that forms a complex with Rli1p and Yae1p; ortholog of human ORAOV1, which is overexpressed in solid tumors; inviability of null mutant under standard conditions is complemented by overexpression of ORAOV1; essential for growth under standard (aerobic) conditions but not under anaerobic conditions; may have a role in protection of ribosomal assembly and function from damage due …	1985	Uncharacterized ORAOV1 family protein YNL260C OS=Saccharomyces cerevisiae (strain ATCC 204508 / S288c) GN=YNL260C PE=1 SV=1	YN00_YEAST	23 kDa	NA	0.68	-0.08	13.693	0.894919	13.94	13.87	13.45	13.68	13.61	13.57	13.84	13.72	13.6	13.65
YNR018W	RCF2	14	664270	664944	W	AIM38	Cytochrome c oxidase subunit; has a role in assembly of respiratory supercomplexes; similar to Rcf1p, and either Rcf1p or Rcf2p is required for late-stage assembly of the Cox12p and Cox13p subunits and for cytochrome c oxidase activity; associates with the cytochrome c oxidase - cytochrome bc1 supercomplex; null mutant accumulates reactive oxygen species; member of the conserved hypoxia induced g…	654	Respiratory supercomplex factor 2, mitochondrial OS=Saccharomyces cerevisiae (strain ATCC 204508 / S288c) GN=RCF2 PE=1 SV=1	RCF2_YEAST	25 kDa	NA	0.11	-0.08	13.949	0.438983	13.99	14.03	13.94	14.06	13.9	13.95	14	13.84	13.91	13.87
YNR029C	YNR029C	14	677199	678488	C		Putative protein of unknown function; deletion confers reduced fitness in saline	1417	Uncharacterized protein YNR029C OS=Saccharomyces cerevisiae (strain ATCC 204508 / S288c) GN=YNR029C PE=1 SV=1	YN8H_YEAST	48 kDa	NA	0.41	-0.08	12.785	0.7494	12.94	12.87	12.7	12.85	12.72	12.56	13.04	12.77	12.64	12.76
YNR050C	LYS9	14	714048	715388	C	saccharopine dehydrogenase (NADP+, L-glutamate-forming)|LYS13	Saccharopine dehydrogenase (NADP+, L-glutamate-forming); catalyzes the formation of saccharopine from alpha-aminoadipate 6-semialdehyde, the seventh step in lysine biosynthesis pathway; exhibits genetic and physical interactions with TRM112	307	Saccharopine dehydrogenase [NADP(+), L-glutamate-forming] OS=Saccharomyces cerevisiae (strain ATCC 204508 / S288c) GN=LYS9 PE=1 SV=1	LYS9_YEAST	49 kDa	NA	0.021	-0.08	14.167	0.174887	14.25	14.31	14.2	14.06	14.23	14.19	13.95	14.15	14.14	14.19
YOL143C	RIB4	15	54595	55104	C	lumazine synthase RIB4	Lumazine synthase (DMRL synthase); catalyzes synthesis of immediate precursor to riboflavin; DMRL synthase stands for 6,7-dimethyl-8-ribityllumazine synthase	2182	6,7-dimethyl-8-ribityllumazine synthase OS=Saccharomyces cerevisiae (strain ATCC 204508 / S288c) GN=RIB4 PE=1 SV=2	RIB4_YEAST	19 kDa	NA	0.78	-0.08	16.254	0.930968	16.48	16.46	16.2	16.21	16.16	16.01	16.33	16.25	16.32	16.12
YOR157C	PUP1	15	630966	631751	C	proteasome core particle subunit beta 2	Beta 2 subunit of the 20S proteasome; endopeptidase with trypsin-like activity that cleaves after basic residues; synthesized as a proprotein before being proteolytically processed for assembly into 20S particle; human homolog is subunit Z	514	Proteasome subunit beta type-2 OS=Saccharomyces cerevisiae (strain ATCC 204508 / S288c) GN=PUP1 PE=1 SV=1	PSB2_YEAST	28 kDa	NA	0.067	-0.08	13.179	0.338926	13.29	13.36	13.03	13.24	13.15	13.03	13.3	13.18	13.07	13.14
YOR184W	SER1	15	679357	680544	W	O-phospho-L-serine:2-oxoglutarate transaminase|ADE9	3-phosphoserine aminotransferase; catalyzes the formation of phosphoserine from 3-phosphohydroxypyruvate, required for serine and glycine biosynthesis; regulated by the general control of amino acid biosynthesis mediated by Gcn4p; protein abundance increases in response to DNA replication stress	1122	Phosphoserine aminotransferase OS=Saccharomyces cerevisiae (strain ATCC 204508 / S288c) GN=SER1 PE=1 SV=1	SERC_YEAST	43 kDa	NA	0.28	-0.08	13.276	0.649821	13.31	13.46	13.17	13.26	13.37	13.25	13.13	13.28	13.19	13.34
YOR352W	TFB6	15	997213	998244	W	TFIIH complex subunit TFB6	Subunit of TFIIH complex; facilities dissociation of the Ssl2p helices from TFIIH; expression levels regulated by Arg5,6p; green fluorescent protein (GFP)-fusion protein localizes to the cytoplasm and nucleus	1300	Uncharacterized protein YOR352W OS=Saccharomyces cerevisiae (strain ATCC 204508 / S288c) GN=YOR352W PE=1 SV=1	YO352_YEAST	39 kDa	NA	0.36	-0.08	12.748	0.720556	12.87	12.95	12.77	12.74	12.57	12.59	12.82	12.76	12.58	12.83
YPL085W	SEC16	16	387067	393654	W	LPF1	COPII vesicle coat protein required for ER transport vesicle budding; essential factor in endoplasmic reticulum exit site (ERES) formation, as well as in COPII-mediated ER-to-Golgi traffic; bound to periphery of ER membranes and may act to stabilize initial COPII complexes; interacts with Sec23p, Sec24p and Sec31p	942	COPII coat assembly protein SEC16 OS=Saccharomyces cerevisiae (strain ATCC 204508 / S288c) GN=SEC16 PE=1 SV=2	SEC16_YEAST	242 kDa	NA	0.22	-0.08	13.51	0.594161	13.53	13.44	13.71	13.53	13.54	13.34	13.63	13.42	13.56	13.4
YPL267W	ACM1	16	38169	38798	W		Pseudosubstrate inhibitor of the APC/C; suppresses APC/C [Cdh1]-mediated proteolysis of mitotic cyclins; associates with Cdh1p, Bmh1p and Bmh2p; cell cycle regulated protein; the anaphase-promoting complex/cyclosome is also known as APC/C	1208	APC/C-CDH1 modulator 1 OS=Saccharomyces cerevisiae (strain ATCC 204508 / S288c) GN=ACM1 PE=1 SV=1	ACM1_YEAST	24 kDa	NA	0.32	-0.08	12.932	0.685525	13.08	13.05	12.72	13.12	12.89	12.79	13.17	12.96	12.93	12.61
YPR004C	AIM45	16	564007	565041	C		Putative ortholog of mammalian ETF-alpha; interacts with frataxin, Yfh1p; null mutant displays elevated frequency of mitochondrial genome loss; may have a role in oxidative stress response; ETF-alpha is an electron transfer flavoprotein complex subunit	136	Probable electron transfer flavoprotein subunit alpha, mitochondrial OS=Saccharomyces cerevisiae (strain ATCC 204508 / S288c) GN=AIM45 PE=1 SV=1	ETFA_YEAST	37 kDa	NA	0.001	-0.08	14.202	0.0181119	14.32	14.39	14.21	14.17	14.14	14.14	14.13	14.19	14.14	14.19
YPR024W	YME1	16	610481	612724	W	i-AAA protease YME1|YTA11|OSD1	Catalytic subunit of i-AAA protease complex; complex is located in mitochondrial inner membrane; responsible for degradation of unfolded or misfolded mitochondrial gene products; serves as nonconventional translocation motor to pull PNPase into intermembrane space; also has role in intermembrane space protein folding; mutation causes elevated rate of mitochondrial turnover; human homolog YME1L1 c…	1453	Mitochondrial inner membrane i-AAA protease supercomplex subunit YME1 OS=Saccharomyces cerevisiae (strain ATCC 204508 / S288c) GN=YME1 PE=1 SV=1	YME1_YEAST	82 kDa	NA	0.43	-0.08	12.059	0.76754	11.91	11.83	12.31	12.19	12.25	11.79	12.22	12.06	12.12	11.91
YPR062W	FCY1	16	677165	677641	W	cytosine deaminase|yCD	Cytosine deaminase; zinc metalloenzyme that catalyzes the hydrolytic deamination of cytosine to uracil; of biomedical interest because it also catalyzes the deamination of 5-fluorocytosine (5FC) to form anticancer drug 5-fluorouracil (5FU)	1447	Cytosine deaminase OS=Saccharomyces cerevisiae (strain ATCC 204508 / S288c) GN=FCY1 PE=1 SV=1	FCY1_YEAST	18 kDa	NA	0.43	-0.08	13.086	0.76754	13.23	13.22	13.03	13.16	12.95	12.98	13.19	13.13	13	12.97
YBL028C	YBL028C	2	167518	167838	C		Protein of unknown function that may interact with ribosomes; green fluorescent protein (GFP)-fusion protein localizes to the nucleolus; predicted to be involved in ribosome biogenesis	1980	UPF0642 protein YBL028C OS=Saccharomyces cerevisiae (strain ATCC 204508 / S288c) GN=YBL028C PE=1 SV=1	YBC8_YEAST	12 kDa	NA	0.68	-0.07	13.151	0.894919	13.29	13.24	13.09	13.29	12.95	12.8	13.52	13.21	13.07	13.05
YBL069W	AST1	2	90741	92030	W		Lipid raft associated protein; interacts with the plasma membrane ATPase Pma1p and has a role in its targeting to the plasma membrane by influencing its incorporation into lipid rafts; sometimes classified in the medium-chain dehydrogenase/reductases (MDRs) superfamily; AST1 has a paralog, AST2, that arose from the whole genome duplication	1751	Protein AST1 OS=Saccharomyces cerevisiae (strain ATCC 204508 / S288c) GN=AST1 PE=4 SV=2	AST1_YEAST	48 kDa	TRUE	0.58	-0.07	11.882	0.85791	11.9	12.02	11.93	11.83	11.94	12.03	11.42	11.75	12.09	11.91
YBR077C	SLM4	2	391805	392293	C	GSE1|NIR1|EGO3	Component of the EGO and GSE complexes; essential for integrity and function of EGO; EGO is involved in the regulation of microautophagy and GSE is required for proper sorting of amino acid permease Gap1p; gene exhibits synthetic genetic interaction with MSS4	1274	Protein SLM4 OS=Saccharomyces cerevisiae (strain ATCC 204508 / S288c) GN=SLM4 PE=1 SV=1	SLM4_YEAST	18 kDa	NA	0.35	-0.07	13.526	0.714905	13.71	13.75	13.32	13.54	13.47	13.49	13.71	13.4	13.45	13.42
YBR164C	ARL1	2	567875	568426	C	Arf family GTPase ARL1|DLP2	Soluble GTPase with a role in regulation of membrane traffic; regulates potassium influx; role in membrane organization at trans-Golgi network; required for delivery of Atg9p to the phagophore assembly site during autophagy under high temperature stress; required with Ypt6p for starvation-induced autophagy; required for the CVT pathway under non-starvation conditions; G protein of the Ras superfa…	820	ADP-ribosylation factor-like protein 1 OS=Saccharomyces cerevisiae (strain ATCC 204508 / S288c) GN=ARL1 PE=1 SV=4	ARL1_YEAST	20 kDa	NA	0.17	-0.07	13.39	0.530482	13.43	13.56	13.42	13.37	13.35	13.44	13.43	13.09	13.48	13.33
YBR198C	TAF5	2	616127	618523	C	chromatin modification protein|TafII90|TAF90	Subunit (90 kDa) of TFIID and SAGA complexes; involved in RNA polymerase II transcription initiation and in chromatin modification	528	Transcription initiation factor TFIID subunit 5 OS=Saccharomyces cerevisiae (strain ATCC 204508 / S288c) GN=TAF5 PE=1 SV=1	TAF5_YEAST	89 kDa	NA	0.072	-0.07	13.717	0.3552	13.59	13.53	14.03	13.8	13.84	13.76	13.55	13.69	13.71	13.67
YDR512C	EMI1	4	1470500	1471063	C		Non-essential protein of unknown function; required for transcriptional induction of the early meiotic-specific transcription factor IME1, also required for sporulation; contains twin cysteine-x9-cysteine motifs; deletion affects mitochondrial morphology	1230	Early meiotic induction protein 1 OS=Saccharomyces cerevisiae (strain ATCC 204508 / S288c) GN=EMI1 PE=3 SV=1	EMI1_YEAST	21 kDa	NA	0.33	-0.07	13.933	0.695443	14.04	14.11	13.87	14	13.88	13.8	13.76	13.9	13.99	13.98
YDR519W	FPR2	4	1480425	1480832	W	peptidylprolyl isomerase family protein FPR2|FKB2	Membrane-bound peptidyl-prolyl cis-trans isomerase (PPIase); binds to the drugs FK506 and rapamycin; expression pattern suggests possible involvement in ER protein trafficking; relocalizes from nucleus to vacuole upon DNA replication stress; mutation is functionally complemented by human FKBP2	2157	Peptidyl-prolyl cis-trans isomerase FPR2 OS=Saccharomyces cerevisiae (strain ATCC 204508 / S288c) GN=FPR2 PE=1 SV=1	FKBP2_YEAST	14 kDa	NA	0.76	-0.07	14.398	0.921536	14.48	14.45	14.53	14.35	14.28	14.09	14.9	14.4	14.46	14.04
YER034W	YER034W	5	221846	222403	W		Protein of unknown function; non-essential gene; expression induced upon calcium shortage; protein abundance increases in response to DNA replication stress	2295	Uncharacterized protein YER034W OS=Saccharomyces cerevisiae (strain ATCC 204508 / S288c) GN=YER034W PE=1 SV=1	YEM4_YEAST	21 kDa	NA	0.84	-0.07	13.114	0.95129	13.29	13.24	12.97	13.23	12.96	12.91	13.5	13.02	13.05	12.97
YER047C	SAP1	5	243810	246503	C	putative AAA family ATPase SAP1	Putative ATPase of the AAA family; interacts with the Sin1p transcriptional repressor in the two-hybrid system	2044	Protein SAP1 OS=Saccharomyces cerevisiae (strain ATCC 204508 / S288c) GN=SAP1 PE=1 SV=1	SAP1_YEAST	100 kDa	NA	0.71	-0.07	10.839	0.900539	10.78	10.52	11.1	11.07	10.88	11.3	10.27	10.59	10.97	10.91
YER094C	PUP3	5	348729	349346	C	proteasome core particle subunit beta 3|SCS32	Beta 3 subunit of the 20S proteasome; involved in ubiquitin-dependent catabolism; human homolog is subunit C10	718	Proteasome subunit beta type-3 OS=Saccharomyces cerevisiae (strain ATCC 204508 / S288c) GN=PUP3 PE=1 SV=1	PSB3_YEAST	23 kDa	NA	0.13	-0.07	13.898	0.470909	13.96	14.15	13.8	13.97	13.84	13.87	13.77	13.88	13.84	13.9
YER128W	VFA1	5	415859	416470	W		Protein that interacts with Vps4p and has a role in vacuolar sorting; stimulates the ATPase activity of Vps4; localizes to endosomes in a Vps4-dependent manner; overexpression causes canavanine sensitivity and confers a partial class D vacuole morphology	1653	VPS4-associated protein 1 OS=Saccharomyces cerevisiae (strain ATCC 204508 / S288c) GN=VFA1 PE=1 SV=1	VFA1_YEAST	23 kDa	NA	0.53	-0.07	11.621	0.837523	11.84	11.82	11.58	11.65	11.32	11.2	12.05	11.56	11.55	11.64
YFL045C	SEC53	6	43628	44392	C	phosphomannomutase SEC53|ALG4	Phosphomannomutase; involved in synthesis of GDP-mannose and dolichol-phosphate-mannose; required for folding and glycosylation of secretory proteins in the ER lumen	406	Phosphomannomutase OS=Saccharomyces cerevisiae (strain ATCC 204508 / S288c) GN=SEC53 PE=1 SV=1	PMM_YEAST	29 kDa	NA	0.039	-0.07	13.765	0.250025	13.92	13.96	13.65	13.78	13.65	13.62	14.01	13.7	13.72	13.64
YGR078C	PAC10	7	639772	640371	C	tubulin-binding prefolding complex subunit PAC10|RKS2|PFD3|GIM2	Part of the heteromeric co-chaperone GimC/prefoldin complex; complex promotes efficient protein folding	827	Prefoldin subunit 3 OS=Saccharomyces cerevisiae (strain ATCC 204508 / S288c) GN=PAC10 PE=1 SV=1	PFD3_YEAST	23 kDa	NA	0.17	-0.07	13.63	0.530482	13.79	13.82	13.5	13.7	13.47	13.49	13.83	13.56	13.58	13.56
YGR103W	NOP7	7	695417	697234	W	mRNA-binding ribosome synthesis protein NOP7|YPH1	Component of several different pre-ribosomal particles; forms a complex with Ytm1p and Erb1p that is required for maturation of the large ribosomal subunit; required for exit from G<sub>0</sub> and the initiation of cell proliferation	840	Pescadillo homolog OS=Saccharomyces cerevisiae (strain ATCC 204508 / S288c) GN=NOP7 PE=1 SV=1	PESC_YEAST	70 kDa	NA	0.18	-0.07	13.99	0.549764	13.83	13.68	14.5	14.02	14.17	13.97	13.91	13.82	14.17	13.83
YGR130C	YGR130C	7	751394	753844	C		Component of the eisosome with unknown function; GFP-fusion protein localizes to the cytoplasm; specifically phosphorylated in vitro by mammalian diphosphoinositol pentakisphosphate (IP7)	449	Uncharacterized protein YGR130C OS=Saccharomyces cerevisiae (strain ATCC 204508 / S288c) GN=YGR130C PE=1 SV=1	YG3A_YEAST	93 kDa	NA	0.051	-0.07	13.95	0.292882	14.07	14.13	13.87	13.99	13.83	13.74	14.27	13.92	13.86	13.82
YGR159C	NSR1	7	806412	807656	C	SHE5	Nucleolar protein that binds nuclear localization sequences; required for pre-rRNA processing and ribosome biogenesis; binds to single stranded telomeric DNA and mRNA; methylated by Hmt1p; interaction with Top1p and nucleolar localization are negatively regulated by polyphosphorylation	272	Nuclear localization sequence-binding protein OS=Saccharomyces cerevisiae (strain ATCC 204508 / S288c) GN=NSR1 PE=1 SV=1	NSR1_YEAST	45 kDa	TRUE	0.016	-0.07	13.708	0.150691	13.85	13.93	13.59	13.71	13.64	13.58	13.87	13.68	13.59	13.64
YGR264C	MES1	7	1019598	1021853	C	methionine--tRNA ligase MES1|MetRS|MESI	Methionyl-tRNA synthetase; forms a complex with glutamyl-tRNA synthetase (Gus1p) and Arc1p, which increases the catalytic efficiency of both tRNA synthetases; also has a role in nuclear export of tRNAs; mutations in human ortholog MARS are associated with pediatric pulmonary alveolar proteinosis	338	Methionine--tRNA ligase, cytoplasmic OS=Saccharomyces cerevisiae (strain ATCC 204508 / S288c) GN=MES1 PE=1 SV=4	SYMC_YEAST	86 kDa	NA	0.026	-0.07	14.328	0.199231	14.12	13.98	14.81	14.43	14.56	14.61	13.77	14.23	14.44	14.33
YGR279C	SCW4	7	1048798	1049958	C	putative family 17 glucosidase	Cell wall protein with similarity to glucanases; scw4 scw10 double mutants exhibit defects in mating; SCW4 has a paralog, SCW10, that arose from the whole genome duplication	950	Probable family 17 glucosidase SCW4 OS=Saccharomyces cerevisiae (strain ATCC 204508 / S288c) GN=SCW4 PE=1 SV=1	SCW4_YEAST	40 kDa	NA	0.22	-0.07	12.826	0.594161	12.96	12.96	12.87	12.78	12.71	12.69	12.99	12.86	12.73	12.71
YHR019C	DED81	8	141894	143558	C	asparagine--tRNA ligase DED81	Cytosolic asparaginyl-tRNA synthetase; required for protein synthesis, catalyzes the specific attachment of asparagine to its cognate tRNA	762	Asparagine--tRNA ligase, cytoplasmic OS=Saccharomyces cerevisiae (strain ATCC 204508 / S288c) GN=DED81 PE=1 SV=1	SYNC_YEAST	62 kDa	NA	0.15	-0.07	13.796	0.507843	13.5	13.34	14.31	13.96	14.08	14.04	13.32	13.68	14.05	13.68
YHR169W	DBP8	8	442181	443476	W	ATP-dependent RNA helicase DBP8	ATPase, putative RNA helicase of the DEAD-box family; component of 90S preribosome complex involved in production of 18S rRNA and assembly of 40S small ribosomal subunit; ATPase activity stimulated by association with Esf2p	2520	ATP-dependent RNA helicase DBP8 OS=Saccharomyces cerevisiae (strain ATCC 204508 / S288c) GN=DBP8 PE=1 SV=1	DBP8_YEAST	48 kDa	NA	0.94	-0.07	14.26	0.976966	14.25	14.19	14.27	14.33	14.39	14.43	14.09	14.08	14.17	14.4
YIL051C	MMF1	9	257843	258280	C	isoleucine biosynthesis protein MMF1|IBM1	Mitochondrial protein required for transamination of isoleucine; but not of valine or leucine; may regulate specificity of branched-chain transaminases Bat1p and Bat2p; induction of expression in response to stress is mediated by a Hog1p-regulated antisense RNA and gene looping; interacts genetically with mitochondrial ribosomal protein genes; MMF1 has a paralog, HMF1, that arose from the whole g…	417	Protein MMF1, mitochondrial OS=Saccharomyces cerevisiae (strain ATCC 204508 / S288c) GN=MMF1 PE=1 SV=1	MMF1_YEAST	16 kDa	NA	0.042	-0.07	13.781	0.260239	13.89	13.95	13.69	13.78	13.77	13.67	13.95	13.68	13.73	13.7
YIL135C	VHS2	9	95065	96375	C		Regulator of septin dynamics; involved in the regulation of septin dynamics at bud neck after mitotic entry, likely by stabilizing septin structure; regulated at post-translational level by cell cycle dependent phosphorylation; likely phosphorylated by Cdc28p and dephosphorylated by Cdc14p before cytokinesis; high-copy suppressor of synthetic lethality of sis2 sit4 double mutant; VHS2 has a paral…	978	Protein VHS2 OS=Saccharomyces cerevisiae (strain ATCC 204508 / S288c) GN=VHS2 PE=1 SV=1	VHS2_YEAST	48 kDa	NA	0.23	-0.07	12.994	0.607237	13.25	13.08	12.82	13.02	12.98	12.94	13.07	12.91	12.83	13.04
YIL143C	SSL2	9	80510	83041	C	TFIIH/NER complex ATPase/helicase subunit SSL2|RAD25|LOM3	Component of RNA polymerase transcription factor TFIIH holoenzyme; acts as dsDNA-dependent translocase in context of TFIIH, unwinds DNA strands during initiation and promotes transcription start site (TSS) scanning; has DNA-dependent ATPase/helicase activity; interacts functionally with TFIIB, has roles in TSS selection and gene looping to juxtapose initiation and termination regions; involved in…	2254	DNA repair helicase RAD25 OS=Saccharomyces cerevisiae (strain ATCC 204508 / S288c) GN=SSL2 PE=1 SV=1	RAD25_YEAST	95 kDa	NA	0.82	-0.07	11.652	0.945171	11.77	11.68	11.52	11.79	11.65	11.82	11.79	11.42	11.57	11.51
YIR006C	PAN1	9	365466	369908	C	DIM2|MIP3|MDP3	Part of actin cytoskeleton-regulatory complex Pan1p-Sla1p-End3p; associates with actin patches on cell cortex; promotes protein-protein interactions essential for endocytosis; binds to and activates Arp2/3 complex in vitro; phosphorylation of Thr-1225 is regulated by MAPK Hog1p in response to osmotic stress; previously thought to be a subunit of poly(A) ribonuclease	499	Actin cytoskeleton-regulatory complex protein PAN1 OS=Saccharomyces cerevisiae (strain ATCC 204508 / S288c) GN=PAN1 PE=1 SV=2	PAN1_YEAST	160 kDa	TRUE	0.061	-0.07	12.856	0.319818	12.8	12.65	13.12	12.96	12.93	12.86	12.74	12.82	12.87	12.81
YJL033W	HCA4	10	383837	386149	W	RNA-dependent ATPase HCA4|ECM24|DBP4	DEAD box RNA helicase; component of the SSU; interacts with Bfr2p and Enp2p; high-copy number suppression of a U14 snoRNA processing mutant suggests an involvement in 18S rRNA synthesis	575	ATP-dependent RNA helicase HCA4 OS=Saccharomyces cerevisiae (strain ATCC 204508 / S288c) GN=HCA4 PE=1 SV=2	DBP4_YEAST	87 kDa	NA	0.089	-0.07	13.012	0.401585	12.82	12.82	13.36	13.19	13.15	13.11	12.8	12.94	13.13	12.8
YJL143W	TIM17	10	147101	147577	W	protein transporter TIM17|SMS1|MPI2|MIM17	Essential component of the TIM23 complex; with Tim23p, contributes to the architecture and function of the import channel; may link the import motor to the core Translocase of the Inner Mitochondrial membrane (TIM23 complex)	1147	Mitochondrial import inner membrane translocase subunit TIM17 OS=Saccharomyces cerevisiae (strain ATCC 204508 / S288c) GN=TIM17 PE=1 SV=1	TIM17_YEAST	17 kDa	NA	0.3	-0.07	15.407	0.669251	15.5	15.62	15.28	15.47	15.31	15.4	15.48	15.37	15.37	15.27
YJL190C	RPS22A	10	74910	75302	C	uS8|ribosomal 40S subunit protein S22A|S8|rp50|YS22|S24A|S22A|RPS24	Protein component of the small (40S) ribosomal subunit; homologous to mammalian ribosomal protein S15A and bacterial S8; RPS22A has a paralog, RPS22B, that arose from the whole genome duplication	556	40S ribosomal protein S22-A OS=Saccharomyces cerevisiae (strain ATCC 204508 / S288c) GN=RPS22A PE=1 SV=2	RS22A_YEAST (+1)	15 kDa	NA	0.08	-0.07	14.627	0.374684	14.81	14.9	14.42	14.63	14.53	14.59	14.68	14.56	14.57	14.58
YJR049C	UTR1	10	526884	528476	C	NADH/NAD(+) kinase	ATP-NADH kinase; phosphorylates both NAD and NADH; active as a hexamer; enhances the activity of ferric reductase (Fre1p); UTR1 has a paralog, YEF1, that arose from the whole genome duplication	2388	NAD(+) kinase OS=Saccharomyces cerevisiae (strain ATCC 204508 / S288c) GN=UTR1 PE=1 SV=2	UTR1_YEAST	59 kDa	NA	0.88	-0.07	12.391	0.960472	12.07	12.16	12.69	12.5	12.56	12.68	12.19	12.36	12.27	12.43
YKL028W	TFA1	11	385758	387206	W	transcription factor TFIIE subunit TFA1	TFIIE large subunit; involved in recruitment of RNA polymerase II to the promoter, activation of TFIIH, and promoter opening	1472	Transcription initiation factor IIE subunit alpha OS=Saccharomyces cerevisiae (strain ATCC 204508 / S288c) GN=TFA1 PE=1 SV=1	T2EA_YEAST	55 kDa	NA	0.44	-0.07	12.781	0.773659	12.94	12.88	12.69	12.74	12.78	12.61	13.09	12.75	12.65	12.68
YKL173W	SNU114	11	122517	125543	W	U5 snRNP GTPase SNU114|GIN10	GTPase component of U5 snRNP involved in mRNA splicing via spliceosome; binds directly to U5 snRNA; proposed to be involved in conformational changes of the spliceosome; similarity to ribosomal translocation factor EF-2	878	Pre-mRNA-splicing factor SNU114 OS=Saccharomyces cerevisiae (strain ATCC 204508 / S288c) GN=SNU114 PE=1 SV=1	SN114_YEAST	114 kDa	NA	0.19	-0.07	13.002	0.560478	13.03	12.98	13.1	13.09	12.99	13.07	13	12.93	12.92	12.91
YKL196C	YKT6	11	74932	75534	C	palmitoyltransferase YKT6	Vesicle membrane protein (v-SNARE) with acyltransferase activity; involved in trafficking to and within the Golgi, endocytic trafficking to the vacuole, and vacuolar fusion; membrane localization due to prenylation at the carboxy-terminus; human homolog YKT6 can complement yeast ykt6 mutant	534	Synaptobrevin homolog YKT6 OS=Saccharomyces cerevisiae (strain ATCC 204508 / S288c) GN=YKT6 PE=1 SV=1	YKT6_YEAST	23 kDa	NA	0.073	-0.07	13.93	0.356736	13.92	13.94	14.08	13.96	13.94	14.16	13.78	13.69	13.9	13.93
YLR109W	AHP1	12	368781	369311	W	thioredoxin peroxidase AHP1|cTPxIII	Thiol-specific peroxiredoxin; reduces hydroperoxides to protect against oxidative damage; function in vivo requires covalent conjugation to Urm1p	1741	Peroxiredoxin type-2 OS=Saccharomyces cerevisiae (strain ATCC 204508 / S288c) GN=AHP1 PE=1 SV=4	AHP1_YEAST	19 kDa	NA	0.58	-0.07	14.127	0.85791	14.23	14.35	14	14.14	14.06	13.99	14.24	14.1	14.09	14.07
YLR185W	RPL37A	12	522663	523288	W	eL37|ribosomal 60S subunit protein L37A|L37e|YL35|L43|L37A	Ribosomal 60S subunit protein L37A; required for processing of 27SB pre-rRNA and formation of stable 66S assembly intermediates; homologous to mammalian ribosomal protein L37, no bacterial homolog; RPL37A has a paralog, RPL37B, that arose from the whole genome duplication	936	60S ribosomal protein L37-A OS=Saccharomyces cerevisiae (strain ATCC 204508 / S288c) GN=RPL37A PE=1 SV=2	RL37A_YEAST	10 kDa	TRUE	0.22	-0.07	14.22	0.594161	14.35	14.48	14.08	14.22	14.09	14.13	14.32	14.24	14.13	14.16
YML006C	GIS4	13	256092	258416	C		CAAX box containing protein of unknown function; proposed to be involved in the RAS/cAMP signaling pathway	1443	Protein GIS4 OS=Saccharomyces cerevisiae (strain ATCC 204508 / S288c) GN=GIS4 PE=1 SV=1	GIS4_YEAST	87 kDa	NA	0.42	-0.07	11.81	0.758577	11.87	12.1	11.9	11.72	11.65	11.92	11.66	11.71	11.68	11.89
YML078W	CPR3	13	111002	111550	W	peptidylprolyl isomerase CPR3|CYP3	Mitochondrial peptidyl-prolyl cis-trans isomerase (cyclophilin); catalyzes the cis-trans isomerization of peptide bonds N-terminal to proline residues; involved in protein refolding after import into mitochondria	1047	Peptidyl-prolyl cis-trans isomerase C, mitochondrial OS=Saccharomyces cerevisiae (strain ATCC 204508 / S288c) GN=CPR3 PE=1 SV=1	CYPC_YEAST	20 kDa	TRUE	0.26	-0.07	13.966	0.635283	14.12	14.14	13.88	13.93	13.89	13.77	14.31	13.92	13.86	13.84
YML100W	TSL1	13	70624	73920	W	trehalose 6-phosphate synthase/phosphatase complex subunit	Large subunit of trehalose 6-phosphate synthase/phosphatase complex; Tps1p-Tps2p complex converts uridine-5'-diphosphoglucose and glucose 6-phosphate to trehalose; contributes to survival to acute lethal heat stress; mutant has aneuploidy tolerance; protein abundance increases in response to DNA replication stress; TSL1 has a paralog, TPS3, that arose from the whole genome duplication	711	Trehalose synthase complex regulatory subunit TSL1 OS=Saccharomyces cerevisiae (strain ATCC 204508 / S288c) GN=TSL1 PE=1 SV=1	TSL1_YEAST	123 kDa	TRUE	0.13	-0.07	12.979	0.470909	12.83	12.8	13.33	13.03	13.1	13.02	12.76	12.84	13.2	12.88
YMR008C	PLB1	13	280590	282584	C	lysophospholipase	Phospholipase B (lysophospholipase) involved in lipid metabolism; required for efficient acyl chain remodeling of newly synthesized phosphatidylethanolamine-derived phosphatidylcholine; required for deacylation of phosphatidylcholine and phosphatidylethanolamine but not phosphatidylinositol; PLB1 has a paralog, PLB3, that arose from the whole genome duplication	1148	Lysophospholipase 1 OS=Saccharomyces cerevisiae (strain ATCC 204508 / S288c) GN=PLB1 PE=1 SV=2	PLB1_YEAST	72 kDa	NA	0.3	-0.07	13.249	0.669251	13.16	13.06	13.6	13.29	13.34	13.05	13.3	13.16	13.27	13.26
YMR095C	SNO1	13	457285	457959	C	putative pyridoxal 5'-phosphate synthase	Protein of unconfirmed function; involved in pyridoxine metabolism; expression is induced during stationary phase; forms a putative glutamine amidotransferase complex with Snz1p, with Sno1p serving as the glutaminase	1966	Pyridoxal 5'-phosphate synthase subunit SNO1 OS=Saccharomyces cerevisiae (strain ATCC 204508 / S288c) GN=SNO1 PE=1 SV=1	SNO1_YEAST	25 kDa	NA	0.67	-0.07	13.731	0.888986	13.79	13.87	13.79	13.55	13.73	13.68	13.95	13.81	13.68	13.46
YNL298W	CLA4	14	68915	71443	W	serine/threonine protein kinase CLA4|ERC10	Cdc42p-activated signal transducing kinase; member of the PAK (p21-activated kinase) family, along with Ste20p and Skm1p; involved in septin ring assembly, vacuole inheritance, cytokinesis, sterol uptake regulation; phosphorylates Cdc3p and Cdc10p; CLA4 has a paralog, SKM1, that arose from the whole genome duplication	940	Serine/threonine-protein kinase CLA4 OS=Saccharomyces cerevisiae (strain ATCC 204508 / S288c) GN=CLA4 PE=1 SV=1	CLA4_YEAST	94 kDa	NA	0.22	-0.07	12.099	0.594161	11.99	11.97	12.31	12.27	12.14	12.06	12.03	12.22	12	12
YOL021C	DIS3	15	282421	285426	C	exosome catalytic subunit DIS3|MTR17|RRP44	Exosome core complex catalytic subunit; has both endonuclease and 3'-5' exonuclease activity; involved in 3'-5' RNA processing and degradation in both the nucleus and the cytoplasm; role in degradation of tRNAs; similar to E. coli RNase R and to human DIS3, which partially complements dis3-81 heat sensitivity; mutations in Dis3p analogous to human mutations implicated in multiple myeloma impair e…	1968	Exosome complex exonuclease DIS3 OS=Saccharomyces cerevisiae (strain ATCC 204508 / S288c) GN=DIS3 PE=1 SV=1	RRP44_YEAST	114 kDa	NA	0.67	-0.07	12.137	0.888986	12.01	11.81	12.5	12.27	12.28	12.09	12.2	12.05	12.25	11.91
YOL030W	GAS5	15	268187	269641	W	1,3-beta-glucanosyltransferase	1,3-beta-glucanosyltransferase; has similarity to Gas1p; localizes to the cell wall	411	1,3-beta-glucanosyltransferase GAS5 OS=Saccharomyces cerevisiae (strain ATCC 204508 / S288c) GN=GAS5 PE=1 SV=1	GAS5_YEAST	52 kDa	NA	0.04	-0.07	12.621	0.254545	12.56	12.51	12.98	12.68	12.6	12.65	12.54	12.53	12.59	12.57
YOL127W	RPL25	15	80348	81190	W	uL23|ribosomal 60S subunit protein L25|L23|rpl6L|YL25|L25	Ribosomal 60S subunit protein L25; primary rRNA-binding ribosomal protein component of large ribosomal subunit; binds to 25S rRNA via a conserved C-terminal motif; homologous to mammalian ribosomal protein L23A and bacterial L23	860	60S ribosomal protein L25 OS=Saccharomyces cerevisiae (strain ATCC 204508 / S288c) GN=RPL25 PE=1 SV=4	RL25_YEAST	16 kDa	NA	0.19	-0.07	13.205	0.560478	13.38	13.49	12.98	13.25	13.07	13.18	13.29	13.1	13.14	13.17
YOR043W	WHI2	15	410870	412330	W		Protein required for full activation of the general stress response; required with binding partner Psr1p, possibly through Msn2p dephosphorylation; regulates growth during the diauxic shift; negative regulator of G1 cyclin expression; SWAT-GFP, seamless-GFP and mCherry fusion proteins localize to the cell periphery	1094	Growth regulation protein OS=Saccharomyces cerevisiae (strain ATCC 204508 / S288c) GN=WHI2 PE=1 SV=2	WHI2_YEAST	55 kDa	NA	0.27	-0.07	12.9	0.64333	12.8	12.91	13.07	12.92	13.01	13.16	12.57	12.84	12.78	12.94
YOR086C	TCB1	15	483219	486779	C	tricalbin	Lipid-binding ER protein involved in ER-plasma membrane tethering; one of 6 proteins (Ist2p, Scs2p, Scs22p, Tcb1p, Tcb2p, Tcb3p) that connect ER to plasma membrane and regulate PI4P levels by controlling access of Sac1p phosphatase to its substrate PI4P in PM; contains 3 calcium and lipid binding domains; non-tagged protein also localizes to mitochondria; C-termini of Tcb1p, Tcb2p and Tcb3p inter…	1309	Tricalbin-1 OS=Saccharomyces cerevisiae (strain ATCC 204508 / S288c) GN=TCB1 PE=1 SV=1	TCB1_YEAST	134 kDa	NA	0.37	-0.07	14.53	0.725985	14.43	14.28	14.78	14.61	14.69	14.36	14.47	14.48	14.74	14.46
YOR098C	NUP1	15	507948	511178	C	FG-nucleoporin NUP1	FG-nucleoporin component of central core of the nuclear pore complex; contributes directly to nucleocytoplasmic transport and maintenance of thenuclear pore complex (NPC) permeability barrier; possible karyopherin release factor that accelerates release of karyopherin-cargo complexes after transport across NPC; both NUP1 and NUP60 are homologous to human NUP153	1489	Nucleoporin NUP1 OS=Saccharomyces cerevisiae (strain ATCC 204508 / S288c) GN=NUP1 PE=1 SV=1	NUP1_YEAST	114 kDa	NA	0.45	-0.07	12.178	0.78169	12.18	12.18	12.22	12.31	12.18	12.09	12.19	12.19	12.1	12.14
YOR122C	PFY1	15	552298	552887	C	profilin|CLS5|PRF1	Profilin; binds actin, phosphatidylinositol 4,5-bisphosphate, and polyproline regions; involved in cytoskeleton organization; required for normal timing of actin polymerization in response to thermal stress; protein abundance increases in response to DNA replication stress; highly conserved protein; human PFN1 (profilin 1) complements temperature sensitive pfy1 mutants, PFN1 mutations are a rare …	2177	Profilin OS=Saccharomyces cerevisiae (strain ATCC 204508 / S288c) GN=PFY1 PE=1 SV=2	PROF_YEAST	14 kDa	NA	0.77	-0.07	12.443	0.925	12.37	12.57	12.53	12.45	12.3	12.22	12.99	12.43	12.35	12.22
YOR163W	DDP1	15	642741	643307	W	polyphosphatase DDP1	Polyphosphate phosphatase; hydrolyzes diphosphorylated inositol polyphosphates and diadenosine polyphosphates; high specificity for diadenosine hexa- and pentaphosphates; contains endopolyphosphatase activity with a high affinity for polyphosphates, an activity also observed for its human DIPP homologs; possesses mRNA decapping activity; nudix hydrolase family member; protein abundance increases …	1769	Diphosphoinositol polyphosphate phosphohydrolase DDP1 OS=Saccharomyces cerevisiae (strain ATCC 204508 / S288c) GN=DDP1 PE=1 SV=3	DDP1_YEAST	22 kDa	NA	0.59	-0.07	13.331	0.86431	13.47	13.45	13.22	13.39	13.21	13.13	13.63	13.26	13.3	13.25
YOR367W	SCP1	15	1026007	1026609	W		Component of yeast cortical actin cytoskeleton; binds and cross links actin filaments; originally identified by its homology to calponin (contains a calponin-like repeat) but the Scp1p domain structure is more similar to transgelin	847	Transgelin OS=Saccharomyces cerevisiae (strain ATCC 204508 / S288c) GN=SCP1 PE=1 SV=1	SCP1_YEAST	23 kDa	NA	0.18	-0.07	14.386	0.549764	14.4	14.48	14.43	14.48	14.3	14.24	14.5	14.37	14.3	14.36
YPL037C	EGD1	16	481428	481901	C		Subunit beta1 of the nascent polypeptide-associated complex (NAC); involved in protein targeting, associated with cytoplasmic ribosomes; enhances DNA binding of the Gal4p activator; homolog of human BTF3b; EGD1 has a paralog, BTT1, that arose from the whole genome duplication	1590	Nascent polypeptide-associated complex subunit beta-1 OS=Saccharomyces cerevisiae (strain ATCC 204508 / S288c) GN=EGD1 PE=1 SV=2	NACB1_YEAST	17 kDa	NA	0.5	-0.07	13.818	0.813442	13.95	14.01	13.65	13.85	13.68	13.67	14.14	13.77	13.79	13.67
YPL059W	GRX5	16	444579	445031	W	monothiol glutaredoxin GRX5	Glutathione-dependent oxidoreductase; mitochondrial matrix protein involved at an early step in the biogenesis of iron-sulfur centers along with Bol1p; hydroperoxide and superoxide-radical responsive; monothiol glutaredoxin subfamily member along with Grx3p and Grx4p	2019	Monothiol glutaredoxin-5, mitochondrial OS=Saccharomyces cerevisiae (strain ATCC 204508 / S288c) GN=GRX5 PE=1 SV=1	GLRX5_YEAST	17 kDa	NA	0.7	-0.07	13.318	0.900539	13.42	13.43	13.31	13.25	13.23	12.98	13.75	13.27	13.46	13.08
YPL084W	BRO1	16	394038	396572	W	NPI3|ASI6|VPS31|LPF2	Cytoplasmic class E vacuolar protein sorting (VPS) factor; coordinates deubiquitination in the multivesicular body (MVB) pathway by recruiting Doa4p to endosomes	1242	Vacuolar-sorting protein BRO1 OS=Saccharomyces cerevisiae (strain ATCC 204508 / S288c) GN=BRO1 PE=1 SV=2	BRO1_YEAST	97 kDa	TRUE	0.34	-0.07	12.018	0.701673	11.9	11.92	12.28	12.07	12.09	11.98	12.1	11.95	12.06	11.83
YPR182W	SMX3	16	900194	900454	W	mRNA splicing protein SMX3|Sm F|SmF	Core Sm protein Sm F; part of heteroheptameric complex (with Smb1p, Smd1p, Smd2p, Smd3p, Sme1p, and Smx2p) that is part of the spliceosomal U1, U2, U4, and U5 snRNPs; homolog of human Sm F	1771	Small nuclear ribonucleoprotein F OS=Saccharomyces cerevisiae (strain ATCC 204508 / S288c) GN=SMX3 PE=1 SV=1	RUXF_YEAST	10 kDa	NA	0.59	-0.07	13.83	0.86431	13.99	13.93	13.74	13.81	13.78	13.6	14.15	13.71	13.78	13.81
YAL049C	AIM2	1	51855	52595	C	protein AIM2	Cytoplasmic protein involved in mitochondrial function or organization; null mutant displays reduced frequency of mitochondrial genome loss; potential Hsp82p interactor	2415	Protein AIM2 OS=Saccharomyces cerevisiae (strain ATCC 204508 / S288c) GN=AIM2 PE=1 SV=1	AIM2_YEAST	27 kDa	NA	0.89	-0.06	14.491	0.962463	14.61	14.52	14.39	14.52	14.41	14.28	15.05	14.29	14.49	14.35
YBL059C-A	CMC2	2	110125	110539	C		Protein involved in respiratory chain complex assembly or maintenance; protein of the mitochondrial intermembrane space; contains twin Cx9C motifs that can form coiled coil-helix-coiled-coil helix fold	1199	COX assembly mitochondrial protein 2 OS=Saccharomyces cerevisiae (strain ATCC 204508 / S288c) GN=CMC2 PE=1 SV=1	COXM2_YEAST	13 kDa	NA	0.32	-0.06	14.273	0.685525	14.49	14.32	14.09	14.34	14.22	14.18	14.37	14.2	14.23	14.29
YBR009C	HHF1	2	255373	255684	C	histone H4	Histone H4; core histone protein required for chromatin assembly and chromosome function; one of two identical histone proteins (see also HHF2); contributes to telomeric silencing; N-terminal domain involved in maintaining genomic integrity	916	Histone H4 OS=Saccharomyces cerevisiae (strain ATCC 204508 / S288c) GN=HHF1 PE=1 SV=2	H4_YEAST	11 kDa	NA	0.21	-0.06	15.141	0.586731	15.29	15.36	14.95	15.18	15.04	15.06	15.24	15.06	15.09	15.14
YBR057C	MUM2	2	352193	353293	C	SPOT8	Protein essential for meiotic DNA replication and sporulation; cytoplasmic protein; subunit of the MIS complex which controls mRNA methylation during during the induction of sporulation; also interacts with Orc2p, which is a component of the origin recognition complex	2604	Protein MUM2 OS=Saccharomyces cerevisiae (strain ATCC 204508 / S288c) GN=MUM2 PE=1 SV=1	MUM2_YEAST	41 kDa	NA	0.99	-0.06	12.831	0.992683	12.99	12.84	12.79	12.79	12.79	12.59	13.16	12.99	12.6	12.77
YBR059C	AKL1	2	356861	360187	C	serine/threonine protein kinase AKL1	Ser-Thr protein kinase; member (with Ark1p and Prk1p) of the Ark kinase family; involved in endocytosis and actin cytoskeleton organization	1380	Serine/threonine-protein kinase AKL1 OS=Saccharomyces cerevisiae (strain ATCC 204508 / S288c) GN=AKL1 PE=1 SV=1	AKL1_YEAST	124 kDa	TRUE	0.39	-0.06	12.158	0.735688	12.05	12	12.44	12.23	12.2	12.02	12.16	12.14	12.23	12.11
YBR106W	PHO88	2	452658	453224	W	SND3	Protein involved in SRP-independent targeting of substrates to the ER; component of an alternative ER targeting pathway that has partial functional redundancy with the GET pathway; preference for substrates with downstream transmembrane domains; interacts with Snd1p, Env10p/Snd2p, and Sec61p-translocon subunits; can compensate for loss of SRP; role in phosphate transport, interacting with pho88, …	425	Inorganic phosphate transport protein PHO88 OS=Saccharomyces cerevisiae (strain ATCC 204508 / S288c) GN=PHO88 PE=1 SV=1	PHO88_YEAST	21 kDa	NA	0.043	-0.06	14.792	0.262665	14.67	14.51	15.29	14.85	14.91	14.94	14.47	14.55	14.92	14.81
YCR009C	RVS161	3	130745	131542	C	amphiphysin-like protein RVS161|SPE161|FUS7|END6	Amphiphysin-like lipid raft protein; N-BAR domain protein that interacts with Rvs167p and regulates polarization of the actin cytoskeleton, endocytosis, cell polarity, cell fusion and viability following starvation or osmotic stress	688	Reduced viability upon starvation protein 161 OS=Saccharomyces cerevisiae (strain ATCC 204508 / S288c) GN=RVS161 PE=1 SV=1	RV161_YEAST	30 kDa	NA	0.13	-0.06	15.229	0.470909	15.34	15.42	15.15	15.26	15.09	15.08	15.42	15.2	15.2	15.13
YCR066W	RAD18	3	231500	232963	W	E3 ubiquitin-protein ligase RAD18	E3 ubiquitin ligase; forms heterodimer with Rad6p to monoubiquitinate PCNA-K164; heterodimer binds single-stranded DNA and has single-stranded DNA dependent ATPase activity; required for postreplication repair; SUMO-targeted ubiquitin ligase (STUbl) that contains a SUMO-interacting motif (SIM) which stimulates its ubiquitin ligase activity towards the sumoylated form of PCNA	986	Postreplication repair E3 ubiquitin-protein ligase RAD18 OS=Saccharomyces cerevisiae (strain ATCC 204508 / S288c) GN=RAD18 PE=1 SV=1	RAD18_YEAST	55 kDa	NA	0.23	-0.06	11.525	0.607237	11.73	11.68	11.42	11.56	11.45	11.19	11.48	11.52	11.52	11.7
YDL150W	RPC53	4	183343	184611	W	DNA-directed RNA polymerase III subunit C53|C53|RPC4	RNA polymerase III subunit C53	1630	DNA-directed RNA polymerase III subunit RPC4 OS=Saccharomyces cerevisiae (strain ATCC 204508 / S288c) GN=RPC53 PE=1 SV=2	RPC4_YEAST	47 kDa	NA	0.52	-0.06	11.963	0.831358	12.02	12.14	11.82	12.08	11.85	11.88	12.21	11.92	11.78	11.93
YDL165W	CDC36	4	164290	164865	W	CCR4-NOT core subunit CDC36|NOT2|DNA19	Component of the CCR4-NOT core complex, involved in mRNA decapping; this complex has multiple roles in regulating mRNA levels including regulation of transcription and destabilizing mRNAs through deadenylation; basal transcription factor	1864	General negative regulator of transcription subunit 2 OS=Saccharomyces cerevisiae (strain ATCC 204508 / S288c) GN=CDC36 PE=1 SV=1	NOT2_YEAST	22 kDa	NA	0.63	-0.06	12.766	0.879112	12.84	13.03	12.57	12.87	12.68	12.59	12.72	12.84	12.72	12.8
YDR032C	PST2	4	504099	504695	C	flavodoxin-like fold family protein	Protein with similarity to a family of flavodoxin-like proteins; induced by oxidative stress in a Yap1p dependent manner; the authentic, non-tagged protein is detected in highly purified mitochondria in high-throughput studies; protein abundance increases in response to DNA replication stress; PST2 has a paralog, RFS1, that arose from the whole genome duplication	1475	Protoplast secreted protein 2 OS=Saccharomyces cerevisiae (strain ATCC 204508 / S288c) GN=PST2 PE=1 SV=1	PST2_YEAST	21 kDa	TRUE	0.44	-0.06	15.435	0.773659	15.57	15.72	15.19	15.51	15.26	15.34	15.68	15.34	15.37	15.37
YDR077W	SED1	4	600793	601809	W		Major stress-induced structural GPI-cell wall glycoprotein; associates with translating ribosomes, possible role in mitochondrial genome maintenance; ORF contains two distinct variable minisatellites; SED1 has a paralog, SPI1, that arose from the whole genome duplication	1806	Cell wall protein SED1 OS=Saccharomyces cerevisiae (strain ATCC 204508 / S288c) GN=SED1 PE=1 SV=1	SED1_YEAST	34 kDa	NA	0.6	-0.06	13.747	0.868156	13.77	13.98	13.72	13.71	13.68	13.7	13.82	13.66	13.74	13.69
YDR167W	TAF10	4	789449	790069	W	TafII25|TAF25|TAF23	Subunit (145 kDa) of TFIID and SAGA complexes; involved in RNA polymerase II transcription initiation and in chromatin modification	938	Transcription initiation factor TFIID subunit 10 OS=Saccharomyces cerevisiae (strain ATCC 204508 / S288c) GN=TAF10 PE=1 SV=1	TAF10_YEAST	23 kDa	NA	0.22	-0.06	14.208	0.594161	14.41	14.32	14.09	14.2	14.12	14.02	14.47	14.22	14.13	14.1
YDR172W	SUP35	4	808324	810381	W	translation termination factor GTPase eRF3|eRF3|[PSI(+)]|[PSI]|SUP36|SUP2|SUF12|SAL3|PNM2|GST1	Translation termination factor eRF3; has a role in mRNA deadenylation and decay; altered protein conformation creates the [PSI(+)] prion that modifies cellular fitness, alters translational fidelity by affecting reading frame selection, and results in a nonsense suppressor phenotype; many stress-response genes are repressed in the presence of [PSI(+)]	479	Eukaryotic peptide chain release factor GTP-binding subunit OS=Saccharomyces cerevisiae (strain ATCC 204508 / S288c) GN=SUP35 PE=1 SV=1	ERF3_YEAST	77 kDa	NA	0.057	-0.06	14.82	0.310147	14.68	14.54	15.19	14.84	15.08	15.08	14.36	14.73	14.91	14.79
YDR226W	ADK1	4	916486	917154	W	adenylate kinase ADK1|AKY2|AKY1	Adenylate kinase, required for purine metabolism; localized to the cytoplasm and the mitochondria; lacks cleavable signal sequence; protein abundance increases in response to DNA replication stress; mutations affecting Adk1p catalytic activity deregulate expression of phosphate utilization genes PHO5 and PHO84; human homolog AK1 can complement yeast adk1 mutant	2527	Adenylate kinase OS=Saccharomyces cerevisiae (strain ATCC 204508 / S288c) GN=ADK1 PE=1 SV=2	KAD2_YEAST	24 kDa	TRUE	0.95	-0.06	14.386	0.979109	14.45	14.47	14.38	14.38	14.24	14.16	14.93	14.31	14.38	14.16
YDR312W	SSF2	4	1087581	1088942	W	rRNA-binding ribosome biosynthesis protein	Protein required for ribosomal large subunit maturation; functionally redundant with Ssf1p; member of the Brix family; SSF2 has a paralog, SSF1, that arose from the whole genome duplication	1204	Cluster of Ribosome biogenesis protein SSF2 OS=Saccharomyces cerevisiae (strain ATCC 204508 / S288c) GN=SSF2 PE=1 SV=1 (SSF2_YEAST)	SSF2_YEAST [2]	52 kDa	TRUE	0.32	-0.06	13.384	0.685525	13.43	13.55	13.47	13.41	13.21	13.36	13.32	13.41	13.31	13.37
YDR485C	VPS72	4	1424820	1427207	C	SWC2	Htz1p-binding component of the SWR1 complex; exchanges histone variant H2AZ (Htz1p) for chromatin-bound histone H2A; may function as a lock that prevents removal of H2AZ from nucleosomes; required for vacuolar protein sorting	2031	Vacuolar protein sorting-associated protein 72 OS=Saccharomyces cerevisiae (strain ATCC 204508 / S288c) GN=VPS72 PE=1 SV=2	VPS72_YEAST	91 kDa	NA	0.7	-0.06	11.265	0.900539	11.39	11.57	11.33	11.23	10.95	10.8	11.76	11.06	11.31	11.25
YDR487C	RIB3	4	1428354	1428980	C	3,4-dihydroxy-2-butanone-4-phosphate synthase RIB3	3,4-dihydroxy-2-butanone-4-phosphate synthase (DHBP synthase); required for riboflavin biosynthesis from ribulose-5-phosphate, also has an unrelated function in mitochondrial respiration	1842	3,4-dihydroxy-2-butanone 4-phosphate synthase OS=Saccharomyces cerevisiae (strain ATCC 204508 / S288c) GN=RIB3 PE=1 SV=1	RIB3_YEAST	23 kDa	NA	0.62	-0.06	14.172	0.874619	14.27	14.27	14.14	14.11	14.1	14.02	14.49	14.12	14.12	14.08
YEL054C	RPL12A	5	52721	53218	C	uL11|ribosomal 60S subunit protein L12A|L11|YL23|L15A|L12A	Ribosomal 60S subunit protein L12A; rpl12a rpl12b double mutant exhibits slow growth and slow translation; homologous to mammalian ribosomal protein L12 and bacterial L11; RPL12A has a paralog, RPL12B, that arose from the whole genome duplication	1988	60S ribosomal protein L12-A OS=Saccharomyces cerevisiae (strain ATCC 204508 / S288c) GN=RPL12A PE=1 SV=1	RL12A_YEAST	18 kDa	NA	0.69	-0.06	12.849	0.897139	12.92	12.99	12.74	12.86	12.78	12.68	13.2	12.74	12.81	12.77
YER174C	GRX4	5	538434	539168	C	monothiol glutaredoxin GRX4	Glutathione-dependent oxidoreductase; hydroperoxide and superoxide-radical responsive; monothiol glutaredoxin subfamily member along with Grx3p and Grx5p; protects cells from oxidative damage; with Grx3p, binds to Aft1p in iron-replete conditions, promoting its dissociation from promoters; mutant has increased aneuploidy tolerance; transcription regulated by Yap5p; GRX4 has a paralog, GRX3, that …	1408	Monothiol glutaredoxin-4 OS=Saccharomyces cerevisiae (strain ATCC 204508 / S288c) GN=GRX4 PE=1 SV=1	GLRX4_YEAST	27 kDa	TRUE	0.41	-0.06	13.15	0.7494	13.27	13.43	13.05	13.13	13.01	13.12	13.29	13.08	13.06	13.06
YGR029W	ERV1	7	543553	544205	W	flavin-linked sulfhydryl oxidase	Flavin-linked sulfhydryl oxidase of the mitochondrial IMS; N-terminus is an intrinsically disordered domain that in the cytosol helps target Erv1p to mitochondria, and in the intermembrane space oxidizes Mia40p as part of a disulfide relay system that promotes intermembrane space retention of imported proteins; functional ortholog of human GFER (ALR); human GFER carrying N-terminal 21 amino acids…	2194	Mitochondrial FAD-linked sulfhydryl oxidase ERV1 OS=Saccharomyces cerevisiae (strain ATCC 204508 / S288c) GN=ERV1 PE=1 SV=2	ERV1_YEAST	22 kDa	NA	0.79	-0.06	13.831	0.93643	13.99	14.04	13.57	13.77	13.84	13.6	14.3	13.89	13.68	13.63
YGR204W	ADE3	7	905934	908774	W	trifunctional formate-tetrahydrofolate ligase/methenyltetrahydrofolate cyclohydrolase/methylenetetrahydrofolate dehydrogenase ADE3	Cytoplasmic trifunctional enzyme C1-tetrahydrofolate synthase; involved in single carbon metabolism and required for biosynthesis of purines, thymidylate, methionine, and histidine; null mutation causes auxotrophy for adenine and histidine	853	C-1-tetrahydrofolate synthase, cytoplasmic OS=Saccharomyces cerevisiae (strain ATCC 204508 / S288c) GN=ADE3 PE=1 SV=1	C1TC_YEAST	102 kDa	TRUE	0.18	-0.06	14.232	0.549764	13.97	13.71	14.78	14.35	14.52	14.45	13.75	14.14	14.43	14.22
YHR042W	NCP1	8	190543	192618	W	CPR1	NADP-cytochrome P450 reductase; involved in ergosterol biosynthesis; associated and coordinately regulated with Erg11p	917	NADPH--cytochrome P450 reductase OS=Saccharomyces cerevisiae (strain ATCC 204508 / S288c) GN=NCP1 PE=1 SV=3	NCPR_YEAST	77 kDa	NA	0.21	-0.06	13.474	0.586731	13.34	13.1	13.88	13.56	13.67	13.65	13.03	13.41	13.59	13.51
YHR076W	PTC7	8	251101	252225	W	type 2C protein phosphatase PTC7	Type 2C serine/threonine protein phosphatase (PP2C); alternatively spliced to create two mRNA isoforms; protein from spliced form localizes to the mitochondria while the one from the unspliced form is localized to the nuclear envelope; activates coenzyme Q6 biosynthesis by dephosphorylation of demethoxy-Q6 hydroxylase Coq7p	657	Protein phosphatase 2C homolog 7, mitochondrial OS=Saccharomyces cerevisiae (strain ATCC 204508 / S288c) GN=PTC7 PE=1 SV=2	PP2C7_YEAST	38 kDa	NA	0.12	-0.06	13.399	0.456388	13.51	13.46	13.35	13.48	13.36	13.22	13.54	13.4	13.36	13.31
YHR200W	RPN10	8	499079	499885	W	proteasome regulatory particle base subunit RPN10|SUN1|MCB1	Non-ATPase base subunit of the 19S RP of the 26S proteasome; N-terminus plays a role in maintaining the structural integrity of the regulatory particle (RP); binds selectively to polyubiquitin chains; homolog of the mammalian S5a protein	1362	26S proteasome regulatory subunit RPN10 OS=Saccharomyces cerevisiae (strain ATCC 204508 / S288c) GN=RPN10 PE=1 SV=3	RPN10_YEAST	30 kDa	NA	0.39	-0.06	12.473	0.735688	12.56	12.63	12.36	12.61	12.31	12.23	12.8	12.44	12.37	12.42
YIL124W	AYR1	9	126204	127097	W	GBG1|acylglycerone-phosphate reductase	Bifunctional triacylglycerol lipase and 1-acyl DHAP reductase; NADPH-dependent 1-acyl dihydroxyacetone phosphate reductase involved in phosphatidic acid biosynthesis; lipid droplet triacylglycerol lipase involved in the mobilization of non-polar lipids; found in lipid particles, the endoplasmic reticulum and the mitochondrial outer membrane; required for spore germination; role in cell wall biosy…	526	NADPH-dependent 1-acyldihydroxyacetone phosphate reductase OS=Saccharomyces cerevisiae (strain ATCC 204508 / S288c) GN=AYR1 PE=1 SV=1	AYR1_YEAST	33 kDa	TRUE	0.07	-0.06	14.674	0.347985	14.8	14.79	14.58	14.63	14.73	14.72	14.46	14.69	14.61	14.73
YJL065C	DLS1	10	315054	315557	C		Subunit of ISW2/yCHRAC chromatin accessibility complex; ISW2/yCHRAC also includes Itc1p, Isw2p, and Dpb4p; involved in inheritance of telomeric silencing; DLS1 has a paralog, DPB3, that arose from the whole genome duplication	1872	Protein DLS1 OS=Saccharomyces cerevisiae (strain ATCC 204508 / S288c) GN=DLS1 PE=1 SV=1	DLS1_YEAST	19 kDa	NA	0.64	-0.06	14.505	0.879112	14.64	14.58	14.39	14.52	14.49	14.26	14.83	14.5	14.51	14.33
YJR034W	PET191	10	496683	497009	W		Protein required for assembly of cytochrome c oxidase; exists as an oligomer; described as both an integral mitochondrial inner membrane protein facing the intermembrane space (IMS) and as a soluble IMS protein; contains a twin Cx9C motif; imported into the IMS via the MIA import machinery	1774	Mitochondrial protein PET191 OS=Saccharomyces cerevisiae (strain ATCC 204508 / S288c) GN=PET191 PE=1 SV=1	PT191_YEAST	12 kDa	NA	0.59	-0.06	14.125	0.86431	14.28	14.24	14.12	14.09	13.94	13.91	14.53	14.03	14.13	13.98
YJR090C	GRR1	10	590872	594327	C	SCF ubiquitin ligase complex subunit GRR1|SDC1|SSU2|COT2|CAT80	F-box protein component of an SCF ubiquitin-ligase complex; modular substrate specificity factor which associates with core SCF (Cdc53p, Skp1p and Hrt1p/Rbx1p) to form the SCF(Grr1) complex; SCF(Grr1) acts as a ubiquitin-protein ligase directing ubiquitination of substrates such as: Gic2p, Mks1p, Mth1p, Cln1p, Cln2p and Cln3p; involved in carbon catabolite repression, glucose-dependent divalent c…	1580	SCF E3 ubiquitin ligase complex F-box protein GRR1 OS=Saccharomyces cerevisiae (strain ATCC 204508 / S288c) GN=GRR1 PE=1 SV=1	GRR1_YEAST	133 kDa	NA	0.49	-0.06	13.775	0.808344	13.9	14.01	13.82	13.68	13.61	13.56	14.06	13.69	13.82	13.6
YKL138C-A	HSK3	11	184803	185012	C		Essential subunit of the Dam1 complex (aka DASH complex); complex couples kinetochores to the force produced by MT depolymerization thereby aiding in chromosome segregation; is transferred to the kinetochore prior to mitosis	1421	DASH complex subunit HSK3 OS=Saccharomyces cerevisiae (strain ATCC 204508 / S288c) GN=HSK3 PE=1 SV=1	HSK3_YEAST	8 kDa	NA	0.41	-0.06	13.018	0.7494	13.07	13.12	12.92	13.1	13.01	12.7	13.33	12.97	12.95	13.01
YKL206C	ADD66	11	49006	49809	C	POC2|PBA2	Protein involved in 20S proteasome assembly; forms a heterodimer with Pba1p that binds to proteasome precursors; interaction with Pba1p-Add66p may affect function of the mature proteasome and its role in maintaining respiratory metabolism; similar to human PAC2 constituent of the PAC1-PAC2 complex involved in proteasome assembly	1662	Proteasome assembly chaperone 2 OS=Saccharomyces cerevisiae (strain ATCC 204508 / S288c) GN=ADD66 PE=1 SV=1	POC2_YEAST	31 kDa	NA	0.54	-0.06	15.007	0.841516	15.1	15.21	14.87	14.91	15.1	15.16	14.74	14.91	14.98	15.09
YKR076W	ECM4	11	582283	583395	W	S-glutathionyl-(chloro)hydroquinone reductase|GTO2	S-glutathionyl-(chloro)hydroquinone reductase (GS-HQR); glutathione transferase involved in cell-surface biosynthesis and architecture; catalyzes glutathione (GSH)-dependent reduction of GS-trichloro-p-hydroquinone to trichloro-p-hydroquinone; expression upregulated upon exposure to genotoxic agents, such as methyl methanesulfonate, cisplatin and bleomycin; not an essential gene; similar to YGR15…	1256	Glutathione S-transferase omega-like 2 OS=Saccharomyces cerevisiae (strain ATCC 204508 / S288c) GN=ECM4 PE=1 SV=1	GTO2_YEAST	43 kDa	NA	0.34	-0.06	13.853	0.701673	13.99	13.94	13.84	13.78	13.86	14.01	13.74	13.84	13.76	13.77
YLR009W	RLP24	12	166537	167136	W	ATPase-activating ribosome biosynthesis protein	Essential protein required for ribosomal large subunit biogenesis; associated with pre-60S ribosomal subunits; stimulates the ATPase activity of Afg2p, which is required for release of Rlp24p from the pre-60S particle; has similarity to Rpl24Ap and Rpl24Bp	1132	Ribosome biogenesis protein RLP24 OS=Saccharomyces cerevisiae (strain ATCC 204508 / S288c) GN=RLP24 PE=1 SV=1	RLP24_YEAST	24 kDa	NA	0.29	-0.06	15.976	0.662346	16.15	16.18	15.79	16.01	15.89	15.91	16.11	15.96	15.89	15.87
YLR126C	YLR126C	12	394765	395520	C	putative amidotransferase	Putative glutamine amidotransferase; has Aft1p-binding motif in the promoter; may be involved in copper and iron homeostasis; YLR126C is not an essential protein; relocalizes from nucleus to cytoplasmic foci upon DNA replication stress	593	Putative glutamine amidotransferase YLR126C OS=Saccharomyces cerevisiae (strain ATCC 204508 / S288c) GN=YLR126C PE=1 SV=1	YL126_YEAST	29 kDa	NA	0.093	-0.06	12.929	0.408254	12.95	13.03	12.96	12.92	12.93	12.77	13.08	12.94	12.89	12.82
YLR153C	ACS2	12	445524	447575	C	acetate--CoA ligase ACS2	Acetyl-coA synthetase isoform; along with Acs1p, acetyl-coA synthetase isoform is the nuclear source of acetyl-coA for histone acetylation; mutants affect global transcription; required for growth on glucose; expressed under anaerobic conditions	1062	Acetyl-coenzyme A synthetase 2 OS=Saccharomyces cerevisiae (strain ATCC 204508 / S288c) GN=ACS2 PE=1 SV=1	ACS2_YEAST	75 kDa	TRUE	0.26	-0.06	14.438	0.635283	14.16	13.91	14.99	14.59	14.74	14.78	13.84	14.29	14.69	14.39
YML022W	APT1	13	228937	229500	W	adenine phosphoribosyltransferase APT1	Adenine phosphoribosyltransferase; catalyzes the formation of AMP from adenine and 5-phosphoribosylpyrophosphate; involved in the salvage pathway of purine nucleotide biosynthesis; APT1 has a paralog, APT2, that arose from the whole genome duplication	1091	Adenine phosphoribosyltransferase 1 OS=Saccharomyces cerevisiae (strain ATCC 204508 / S288c) GN=APT1 PE=1 SV=3	APT1_YEAST	21 kDa	NA	0.27	-0.06	14.897	0.64333	15.01	15.13	14.83	14.83	14.77	14.83	15.12	14.81	14.87	14.77
YML081C-A	ATP18	13	103983	104162	C	F1F0 ATP synthase subunit i	Subunit of the mitochondrial F1F0 ATP synthase; F1F0 ATP synthase is a large, evolutionarily conserved enzyme complex required for ATP synthesis; termed subunit I or subunit j; does not correspond to known ATP synthase subunits in other organisms	1392	ATP synthase subunit J, mitochondrial OS=Saccharomyces cerevisiae (strain ATCC 204508 / S288c) GN=ATP18 PE=1 SV=1	ATP18_YEAST	7 kDa	NA	0.4	-0.06	14.42	0.743185	14.52	14.74	14.35	14.39	14.24	14.22	14.65	14.31	14.52	14.26
YML117W	NAB6	13	34243	37647	W		Putative RNA-binding protein; associates with mRNAs encoding cell wall proteins in high-throughput studies; deletion mutants display increased sensitivity to some cell wall disrupting agents; expression negatively regulated by cAMP	1690	RNA-binding protein NAB6 OS=Saccharomyces cerevisiae (strain ATCC 204508 / S288c) GN=NAB6 PE=1 SV=1	NAB6_YEAST	126 kDa	TRUE	0.55	-0.06	11.738	0.84994	11.75	11.7	11.94	11.86	11.63	11.71	11.95	11.28	11.76	11.8
YMR086W	SEG1	13	439208	442090	W		Component of eisosome required for proper eisosome assembly; precedes Pil1p/Lsp1p during eisosome formation, controls eisosome length and shape; diffusely distributed, forms heterogeneous patches at plasma membrane in small buds, also found in medium and large buds; expression repressed by cAMP; similar to A. gossypii SEG gene and to S. pombe Sle1p, important for generating eisosomes; SEG1 has a …	387	Eisosome protein SEG1 OS=Saccharomyces cerevisiae (strain ATCC 204508 / S288c) GN=SEG1 PE=1 SV=1	SEG1_YEAST	106 kDa	NA	0.035	-0.06	12.855	0.235455	12.83	12.87	12.99	12.82	12.92	12.88	12.77	12.84	12.84	12.79
YMR260C	TIF11	13	789378	789839	C		Translation initiation factor eIF1A; essential protein that forms a complex with Sui1p (eIF1) and the 40S ribosomal subunit and scans for the start codon; C-terminus associates with Fun12p (eIF5B); N terminus interacts with eIF2 and eIF3	1364	Eukaryotic translation initiation factor 1A OS=Saccharomyces cerevisiae (strain ATCC 204508 / S288c) GN=TIF11 PE=1 SV=1	IF1A_YEAST	17 kDa	TRUE	0.39	-0.06	13.57	0.735688	13.69	13.75	13.5	13.53	13.48	13.35	13.83	13.53	13.57	13.47
YMR276W	DSK2	13	818827	819948	W		Nuclear-enriched ubiquitin-like polyubiquitin-binding protein; required for spindle pole body (SPB) duplication and for transit through the G2/M phase of the cell cycle; involved in proteolysis; interacts with the proteasome; protein abundance increases in response to DNA replication stress	1773	Ubiquitin domain-containing protein DSK2 OS=Saccharomyces cerevisiae (strain ATCC 204508 / S288c) GN=DSK2 PE=1 SV=2	DSK2_YEAST	39 kDa	TRUE	0.59	-0.06	14.76	0.86431	14.85	14.84	14.68	14.8	14.7	14.62	15.11	14.75	14.67	14.58
YMR290C	HAS1	13	850074	851591	C	ATP-dependent RNA helicase HAS1	ATP-dependent RNA helicase; involved in the biogenesis of 40S and 60S ribosome subunits; localizes to both the nuclear periphery and nucleolus; highly enriched in nuclear pore complex fractions; constituent of 66S pre-ribosomal particles	629	ATP-dependent RNA helicase HAS1 OS=Saccharomyces cerevisiae (strain ATCC 204508 / S288c) GN=HAS1 PE=1 SV=1	HAS1_YEAST	57 kDa	NA	0.1	-0.06	13.361	0.415064	13.2	13.02	13.77	13.4	13.69	13.72	12.68	13.34	13.43	13.36
YNL010W	YNL010W	14	613635	614360	W	putative phosphoric monoester hydrolase	Putative protein of unknown function; similar to phosphoserine phosphatases; green fluorescent protein (GFP)-fusion protein localizes to the cytoplasm and nucleus; homozygous diploid mutant shows an increase in glycogen accumulation	733	Uncharacterized phosphatase YNL010W OS=Saccharomyces cerevisiae (strain ATCC 204508 / S288c) GN=YNL010W PE=1 SV=1	YNB0_YEAST	27 kDa	NA	0.14	-0.06	13.335	0.488679	13.43	13.45	13.31	13.34	13.27	13.24	13.48	13.32	13.32	13.19
YNL099C	OCA1	14	438567	439283	C	putative tyrosine protein phosphatase OCA1	Putative protein tyrosine phosphatase; required for cell cycle arrest in response to oxidative damage of DNA	1601	Putative tyrosine-protein phosphatase OCA1 OS=Saccharomyces cerevisiae (strain ATCC 204508 / S288c) GN=OCA1 PE=1 SV=1	OCA1_YEAST	27 kDa	NA	0.5	-0.06	13.527	0.813442	13.53	13.67	13.44	13.68	13.39	13.44	13.92	13.42	13.32	13.46
YNL212W	VID27	14	247461	249809	W		Cytoplasmic protein of unknown function; possibly involved in vacuolar protein degradation; not essential for proteasome-dependent degradation of fructose-1,6-bisphosphatase (FBPase); null mutants exhibit normal growth; contains two PH-like domains	2276	Vacuolar import and degradation protein 27 OS=Saccharomyces cerevisiae (strain ATCC 204508 / S288c) GN=VID27 PE=1 SV=1	VID27_YEAST	89 kDa	NA	0.83	-0.06	11.691	0.948676	11.67	11.21	12.08	11.65	11.92	11.8	11.46	11.66	11.76	11.7
YNL277W	MET2	14	117349	118809	W	homoserine O-acetyltransferase	L-homoserine-O-acetyltransferase; catalyzes the conversion of homoserine to O-acetyl homoserine which is the first step of the methionine biosynthetic pathway	1887	Homoserine O-acetyltransferase OS=Saccharomyces cerevisiae (strain ATCC 204508 / S288c) GN=MET2 PE=1 SV=2	MET2_YEAST	54 kDa	NA	0.64	-0.06	12.584	0.879112	12.7	12.85	12.39	12.48	12.63	12.62	12.4	12.61	12.29	12.87
YOL077C	BRX1	15	185848	186723	C		Nucleolar protein; constituent of 66S pre-ribosomal particles; depletion leads to defects in rRNA processing and a block in the assembly of large ribosomal subunits; possesses a sigma(70)-like RNA-binding motif	668	Ribosome biogenesis protein BRX1 OS=Saccharomyces cerevisiae (strain ATCC 204508 / S288c) GN=BRX1 PE=1 SV=2	BRX1_YEAST	34 kDa	NA	0.12	-0.06	14.003	0.456388	14.06	14.18	13.9	14.02	14	14.03	13.93	14.03	13.92	13.96
YOL108C	INO4	15	111431	111886	C		Transcription factor involved in phospholipid synthesis; required for derepression of inositol-choline-regulated genes involved in phospholipid synthesis; forms a complex, with Ino2p, that binds the inositol-choline-responsive element through a basic helix-loop-helix domain	1706	Protein INO4 OS=Saccharomyces cerevisiae (strain ATCC 204508 / S288c) GN=INO4 PE=1 SV=1	INO4_YEAST	17 kDa	NA	0.56	-0.06	11.669	0.855189	11.78	11.81	11.53	11.79	11.57	11.41	12	11.65	11.59	11.56
YOL140W	ARG8	15	58759	60030	W	acetylornithine transaminase	Acetylornithine aminotransferase; catalyzes the fourth step in the biosynthesis of the arginine precursor ornithine	395	Acetylornithine aminotransferase, mitochondrial OS=Saccharomyces cerevisiae (strain ATCC 204508 / S288c) GN=ARG8 PE=1 SV=1	ARGD_YEAST	47 kDa	TRUE	0.037	-0.06	13.119	0.243223	13.2	13.28	13.09	13.04	13.18	13.16	12.83	13.17	13.06	13.18
YOR281C	PLP2	15	846269	847129	C		Protein that interacts with the CCT complex to stimulate actin folding; has similarity to phosducins; null mutant lethality is complemented by mouse phosducin-like protein MgcPhLP; CCT is short for chaperonin containing TCP-1; essential gene	1049	Phosducin-like protein 2 OS=Saccharomyces cerevisiae (strain ATCC 204508 / S288c) GN=PLP2 PE=1 SV=1	PLP2_YEAST	33 kDa	NA	0.26	-0.06	14.138	0.635283	14.25	14.29	14.05	14.1	14.12	14.04	14.31	14.09	14.04	14.09
YPL023C	MET12	16	504339	506312	C	methylenetetrahydrofolate reductase (NAD(P)H) MET12	Protein with MTHFR activity in vitro; null mutant has no phenotype and is prototrophic for methionine; MET13 encodes major isozyme of methylenetetrahydrofolate reductase (MTHFR)	2311	Methylenetetrahydrofolate reductase 1 OS=Saccharomyces cerevisiae (strain ATCC 204508 / S288c) GN=MET12 PE=1 SV=2	MTHR1_YEAST	74 kDa	NA	0.84	-0.06	12.777	0.95129	12.61	12.63	13.17	12.67	12.95	12.99	12.5	12.66	12.96	12.63
YPL117C	IDI1	16	327864	328730	C	isopentenyl-diphosphate delta-isomerase IDI1|LPH10|BOT2	Isopentenyl diphosphate:dimethylallyl diphosphate isomerase; catalyzes an essential activation step in the isoprenoid biosynthetic pathway; required for viability; isopentenyl diphosphate:dimethylallyl diphosphate isomerase is also known as IPP isomerase	763	Isopentenyl-diphosphate Delta-isomerase OS=Saccharomyces cerevisiae (strain ATCC 204508 / S288c) GN=IDI1 PE=1 SV=2	IDI1_YEAST	33 kDa	NA	0.15	-0.06	13.918	0.507843	14.01	14.07	13.88	13.95	13.83	13.76	14.16	13.84	13.86	13.82
YPL127C	HHO1	16	308828	309604	C	histone H1	Histone H1, linker histone with roles in meiosis and sporulation; decreasing levels early in sporulation may promote meiosis, and increasing levels during sporulation facilitate compaction of spore chromatin; binds to promoters and within genes in mature spores; may be recruited by Ume6p to promoter regions, contributing to transcriptional repression outside of meiosis; suppresses DNA repair invo…	1273	Histone H1 OS=Saccharomyces cerevisiae (strain ATCC 204508 / S288c) GN=HHO1 PE=1 SV=1	H1_YEAST	28 kDa	TRUE	0.35	-0.06	13.596	0.714905	13.73	13.74	13.45	13.62	13.53	13.49	13.81	13.51	13.54	13.54
YPL170W	DAP1	16	228314	228772	W		Heme-binding protein; involved in regulation of cytochrome P450 protein Erg11p; damage response protein, related to mammalian membrane progesterone receptors; mutations lead to defects in telomeres, mitochondria, and sterol synthesis	2393	Damage response protein 1 OS=Saccharomyces cerevisiae (strain ATCC 204508 / S288c) GN=DAP1 PE=1 SV=1	DAP1_YEAST	17 kDa	NA	0.88	-0.06	13.068	0.960472	13.05	13.09	13.06	13.13	13.01	12.8	13.54	13.03	12.99	12.98
YPL178W	CBC2	16	212158	212784	W	CBP20|SAE1|MUD13	Small subunit of the heterodimeric cap binding complex with Sto1p; interacts with Npl3p, possibly to package mRNA for export from the nucleus; may have a role in telomere maintenance; contains an RNA-binding motif	1339	Nuclear cap-binding protein subunit 2 OS=Saccharomyces cerevisiae (strain ATCC 204508 / S288c) GN=CBC2 PE=1 SV=1	NCBP2_YEAST	24 kDa	NA	0.38	-0.06	13.988	0.729577	14.11	14.07	13.92	14.05	13.82	13.85	14.36	13.95	13.84	13.91
YPL195W	APL5	16	176223	179021	W	YKS4	Delta adaptin-like subunit of the clathrin associated protein complex; functions in transport of alkaline phosphatase to the vacuole via the alternate pathway; suppressor of loss of casein kinase 1 function; the clathrin associated protein complex is also known as AP-3	1516	AP-3 complex subunit delta OS=Saccharomyces cerevisiae (strain ATCC 204508 / S288c) GN=APL5 PE=1 SV=1	AP3D_YEAST	107 kDa	NA	0.46	-0.06	12.319	0.790577	12.24	12	12.62	12.51	12.38	12.19	12.44	12.1	12.38	12.33
YPR019W	MCM4	16	596750	599551	W	MCM DNA helicase complex subunit MCM4|CDC54|HCD21	Essential helicase component of heterohexameric MCM2-7 complexes; MCM2-7 complexes bind pre-replication complexes on DNA and melt DNA prior to replication; forms an Mcm4p-6p-7p subcomplex; shows nuclear accumulation in G1; homolog of S. pombe Cdc21p	2238	DNA replication licensing factor MCM4 OS=Saccharomyces cerevisiae (strain ATCC 204508 / S288c) GN=MCM4 PE=1 SV=2	MCM4_YEAST	105 kDa	NA	0.81	-0.06	12.062	0.94203	11.95	11.67	12.46	12.22	12.15	12.04	12	12.08	12.08	11.97
YPR020W	ATP20	16	599870	600217	W	F1F0 ATP synthase subunit g	Subunit g of the mitochondrial F1F0 ATP synthase; reversibly phosphorylated on two residues; unphosphorylated form is required for dimerization of the ATP synthase complex, which in turn determines oligomerization of the complex and the shape of inner membrane cristae	765	ATP synthase subunit g, mitochondrial OS=Saccharomyces cerevisiae (strain ATCC 204508 / S288c) GN=ATP20 PE=1 SV=1	ATPN_YEAST	13 kDa	NA	0.15	-0.06	13.843	0.507843	13.97	14.09	13.78	13.84	13.67	13.77	13.89	13.76	13.84	13.82
YPR035W	GLN1	16	642208	643320	W	glutamate--ammonia ligase	Glutamine synthetase (GS); synthesizes glutamine from glutamate and ammonia; with Glt1p, forms the secondary pathway for glutamate biosynthesis from ammonia; expression regulated by nitrogen source and by amino acid limitation; forms filaments of back-to-back stacks of cylindrical homo-decamers at low pH, leading to enzymatic inactivation and storage during states of advanced cellular starvation;…	263	Glutamine synthetase OS=Saccharomyces cerevisiae (strain ATCC 204508 / S288c) GN=GLN1 PE=1 SV=4	GLNA_YEAST	42 kDa	TRUE	0.014	-0.06	13.87	0.13683	13.93	14	13.8	13.86	13.95	13.87	13.65	13.91	13.8	13.93
YPR159W	KRE6	16	857583	859745	W	beta-glucan synthesis-associated protein KRE6|CWH48	Type II integral membrane protein; required for beta-1,6 glucan biosynthesis; putative beta-glucan synthase; localizes to ER, plasma membrane, sites of polarized growth and secretory vesicles; functionally redundant with Skn1p; KRE6 has a paralog, SKN1, that arose from the whole genome duplication	1150	Beta-glucan synthesis-associated protein KRE6 OS=Saccharomyces cerevisiae (strain ATCC 204508 / S288c) GN=KRE6 PE=1 SV=2	KRE6_YEAST	80 kDa	NA	0.3	-0.06	13.022	0.669251	12.98	12.92	13.19	13.06	13.21	12.92	12.72	12.98	13.12	13.12
YPR174C	YPR174C	16	888043	888708	C		Protein of unknown function; green fluorescent protein (GFP)-fusion protein localizes to the nuclear periphery; potential Cdc28p substrate; binds phosphatidylinositols and phosphatidylethanolamine in a large-scale study; relative distribution to foci at the nuclear periphery increases upon DNA replication stress; YPR174C has a paralog, NBP1, that arose from the whole genome duplication	2326	Nuclear envelope protein YPR174C OS=Saccharomyces cerevisiae (strain ATCC 204508 / S288c) GN=YPR174C PE=1 SV=1	YP174_YEAST	25 kDa	NA	0.85	-0.06	14.448	0.951383	14.57	14.41	14.43	14.63	14.25	14.21	14.8	14.53	14.32	14.33
YAL059W	ECM1	1	36509	37147	W		Pre-ribosomal factor involved in 60S ribosomal protein subunit export; associates with the pre-60S particle; shuttles between the nucleus and cytoplasm	1102	Shuttling pre-60S factor ECM1 OS=Saccharomyces cerevisiae (strain ATCC 204508 / S288c) GN=ECM1 PE=1 SV=2	ECM1_YEAST	24 kDa	NA	0.28	-0.05	14.448	0.649821	14.58	14.59	14.32	14.46	14.37	14.37	14.68	14.44	14.31	14.36
YBL033C	RIB1	2	158656	159693	C	GTP cyclohydrolase II	GTP cyclohydrolase II; catalyzes the first step of the riboflavin biosynthesis pathway	1883	GTP cyclohydrolase-2 OS=Saccharomyces cerevisiae (strain ATCC 204508 / S288c) GN=RIB1 PE=1 SV=2	RIB1_YEAST	38 kDa	NA	0.64	-0.05	13.491	0.879112	13.57	13.58	13.4	13.54	13.42	13.31	13.63	13.53	13.51	13.42
YBR014C	GRX7	2	266725	267336	C	glutathione-disulfide reductase GRX7	Cis-golgi localized monothiol glutaredoxin; more similar in activity to dithiol than other monothiol glutaredoxins; involved in the oxidative stress response; does not bind metal ions; GRX7 has a paralog, GRX6, that arose from the whole genome duplication	1456	Monothiol glutaredoxin-7 OS=Saccharomyces cerevisiae (strain ATCC 204508 / S288c) GN=GRX7 PE=1 SV=1	GLRX7_YEAST	23 kDa	NA	0.43	-0.05	13.681	0.76754	13.75	13.67	13.77	13.72	13.62	13.62	13.76	13.5	13.72	13.68
YBR062C	YBR062C	2	365976	366600	C		Protein of unknown function that interacts with Msb2p; may play a role in activation of the filamentous growth pathway	2078	Uncharacterized RING finger protein YBR062C OS=Saccharomyces cerevisiae (strain ATCC 204508 / S288c) GN=YBR062C PE=1 SV=2	YBR2_YEAST	21 kDa	NA	0.72	-0.05	11.874	0.906122	11.87	12.13	11.76	11.84	11.85	11.54	12.34	11.84	11.87	11.7
YBR089C-A	NHP6B	2	426190	426489	C	high-mobility group nucleosome-binding protein|YBR090C-A	High-mobility group (HMG) protein; binds to and remodels nucleosomes; involved in recruiting FACT and other chromatin remodelling complexes to the chromosomes; functionally redundant with Nhp6Ap; required for transcriptional initiation fidelity of some tRNA genes; homologous to mammalian HMGB1 and HMGB2; NHP6B has a paralog, NHP6A, that arose from the whole genome duplication	1981	Non-histone chromosomal protein 6B OS=Saccharomyces cerevisiae (strain ATCC 204508 / S288c) GN=NHP6B PE=1 SV=3	NHP6B_YEAST	11 kDa	TRUE	0.68	-0.05	14.716	0.894919	14.89	14.8	14.58	14.71	14.62	14.44	15.15	14.66	14.76	14.55
YBR139W	YBR139W	2	515664	517190	W	carboxypeptidase C	Putative serine type carboxypeptidase; role in phytochelatin synthesis; green fluorescent protein (GFP)-fusion protein localizes to the vacuole; expression induced by nitrogen limitation in a GLN3, GAT1-independent manner	874	Putative serine carboxypeptidase YBR139W OS=Saccharomyces cerevisiae (strain ATCC 204508 / S288c) GN=YBR139W PE=1 SV=1	YBY9_YEAST	58 kDa	NA	0.19	-0.05	13.815	0.560478	13.9	13.95	13.82	13.7	13.9	13.97	13.36	13.78	13.8	13.97
YBR216C	YBP1	2	655576	657600	C		Protein involved in cellular response to oxidative stress; required for oxidation of specific cysteine residues of transcription factor Yap1p, resulting in nuclear localization of Yap1p in response to stress; YBP1 has a paralog, YBP2, that arose from the whole genome duplication	1651	YAP1-binding protein 1 OS=Saccharomyces cerevisiae (strain ATCC 204508 / S288c) GN=YBP1 PE=1 SV=1	YBP1_YEAST	78 kDa	NA	0.53	-0.05	12.38	0.837523	12.43	12.28	12.35	12.52	12.4	12.09	12.55	12.37	12.2	12.61
YCL032W	STE50	3	63441	64481	W		Adaptor protein for various signaling pathways; involved in mating response, invasive/filamentous growth, osmotolerance; acts as an adaptor that links G protein-associated Cdc42p-Ste20p complex to the effector Ste11p to modulate signal transduction	1704	Protein STE50 OS=Saccharomyces cerevisiae (strain ATCC 204508 / S288c) GN=STE50 PE=1 SV=1	STE50_YEAST	39 kDa	NA	0.56	-0.05	13.79	0.855189	13.82	13.98	13.76	13.75	13.74	13.68	13.92	13.69	13.79	13.77
YCR051W	YCR051W	3	214071	214739	W		Putative protein of unknown function; green fluorescent protein (GFP)-fusion protein localizes to the cytoplasm and nucleus; contains ankyrin (Ank) repeats; YCR051W is not an essential gene	659	Ankyrin repeat-containing protein YCR051W OS=Saccharomyces cerevisiae (strain ATCC 204508 / S288c) GN=YCR051W PE=1 SV=1	YCU1_YEAST	25 kDa	NA	0.12	-0.05	12.574	0.456388	12.72	12.63	12.52	12.6	12.48	12.38	12.91	12.56	12.55	12.39
YDL006W	PTC1	4	439909	440754	W	type 2C protein phosphatase PTC1|TPD1|KCS2|CWH47	Type 2C protein phosphatase (PP2C); dephosphorylates Hog1p, inactivating osmosensing MAPK cascade; involved in Fus3p activation during pheromone response; deletion affects precursor tRNA splicing, mitochondrial inheritance, and sporulation	1127	Protein phosphatase 2C homolog 1 OS=Saccharomyces cerevisiae (strain ATCC 204508 / S288c) GN=PTC1 PE=1 SV=1	PP2C1_YEAST	32 kDa	NA	0.29	-0.05	14.833	0.662346	14.91	14.92	14.79	14.85	14.8	14.73	14.96	14.78	14.78	14.81
YDL019C	OSH2	4	417663	421514	C	oxysterol-binding protein related protein OSH2	Member of an oxysterol-binding protein family with seven members; in S. cerevisiae, family members have overlapping, redundant functions in sterol metabolism and collectively perform a function essential for viability; contains FFAT motif; interacts with ER anchor Scs2p at patches at the plasma membrane and at the nuclear envelope; regulated by sterol binding; OSH2 has a paralog, SWH1, that arose…	943	Oxysterol-binding protein homolog 2 OS=Saccharomyces cerevisiae (strain ATCC 204508 / S288c) GN=OSH2 PE=1 SV=1	OSH2_YEAST	146 kDa	NA	0.22	-0.05	13.186	0.594161	13.2	13.09	13.2	13.21	13.37	13.26	12.93	13.1	13.18	13.32
YDL045W-A	MRP10	4	372248	372535	W	mitochondrial 37S ribosomal protein YmS-T|YmS-T	Mitochondrial ribosomal protein of the small subunit; contains twin cysteine-x9-cysteine motifs; oxidized by Mia40p during import into mitochondria	851	37S ribosomal protein MRP10, mitochondrial OS=Saccharomyces cerevisiae (strain ATCC 204508 / S288c) GN=MRP10 PE=1 SV=1	MRP10_YEAST	11 kDa	NA	0.18	-0.05	13.922	0.549764	14.12	14.1	13.84	13.95	13.92	13.94	13.46	13.92	13.92	14.05
YDL105W	NSE4	4	272389	273597	W	Smc5-Smc6 complex subunit NSE4|QRI2	Component of the SMC5-SMC6 complex; this complex plays a key role in the removal of X-shaped DNA structures that arise between sister chromatids during DNA replication and repair	1143	Non-structural maintenance of chromosome element 4 OS=Saccharomyces cerevisiae (strain ATCC 204508 / S288c) GN=NSE4 PE=1 SV=1	NSE4_YEAST	46 kDa	NA	0.29	-0.05	13.082	0.662346	13.26	13.25	12.99	13.04	13.02	12.99	13.06	13.06	13.07	13.08
YDL182W	LYS20	4	133437	134723	W	homocitrate synthase LYS20	Homocitrate synthase isozyme and functions in DNA repair; catalyzes the condensation of acetyl-CoA and alpha-ketoglutarate to form homocitrate, which is the first step in the lysine biosynthesis pathway; LYS20 has a paralog, LYS21, that arose from the whole genome duplication	1374	Cluster of Homocitrate synthase, cytosolic isozyme OS=Saccharomyces cerevisiae (strain ATCC 204508 / S288c) GN=LYS20 PE=1 SV=1 (HOSC_YEAST)	HOSC_YEAST [2]	47 kDa	TRUE	0.39	-0.05	12.969	0.735688	12.99	13.1	12.85	12.9	13.08	12.94	12.92	13.04	12.84	13.03
YDL198C	GGC1	4	103649	104551	C	SHM1|YHM1	Mitochondrial GTP/GDP transporter; essential for mitochondrial genome maintenance; has a role in mitochondrial iron transport; member of the mitochondrial carrier family	371	Mitochondrial GTP/GDP carrier protein 1 OS=Saccharomyces cerevisiae (strain ATCC 204508 / S288c) GN=GGC1 PE=1 SV=1	GGC1_YEAST	33 kDa	NA	0.033	-0.05	14.806	0.229758	14.89	14.98	14.76	14.72	14.84	14.85	14.59	14.85	14.72	14.86
YDR050C	TPI1	4	555726	556472	C	triose-phosphate isomerase TPI1	Triose phosphate isomerase, abundant glycolytic enzyme; mRNA half-life is regulated by iron availability; transcription is controlled by activators Reb1p, Gcr1p, and Rap1p through binding sites in the 5' non-coding region; inhibition of Tpi1p activity by PEP (phosphoenolpyruvate) stimulates redox metabolism in respiring cells; E104D mutation in human homolog TPI1 causes a rare autosomal disease; …	982	Triosephosphate isomerase OS=Saccharomyces cerevisiae (strain ATCC 204508 / S288c) GN=TPI1 PE=1 SV=2	TPIS_YEAST	27 kDa	NA	0.23	-0.05	12.686	0.607237	12.87	12.9	12.44	12.71	12.59	12.67	12.81	12.61	12.57	12.69
YDR071C	PAA1	4	588827	589402	C	polyamine acetyltransferase	Polyamine acetyltransferase; acetylates polyamines (e.g. putrescine, spermidine, spermine) and also aralkylamines (e.g. tryptamine, phenylethylamine); may be involved in transcription and/or DNA replication	845	Polyamine N-acetyltransferase 1 OS=Saccharomyces cerevisiae (strain ATCC 204508 / S288c) GN=PAA1 PE=1 SV=1	PAA1_YEAST	22 kDa	NA	0.18	-0.05	13.644	0.549764	13.72	13.79	13.56	13.63	13.61	13.5	13.86	13.59	13.62	13.56
YDR092W	UBC13	4	629876	630605	W	E2 ubiquitin-conjugating protein UBC13	E2 ubiquitin-conjugating enzyme; involved in the error-free DNA postreplication repair pathway; interacts with Mms2p to assemble ubiquitin chains at the Ub Lys-63 residue; DNA damage triggers redistribution from the cytoplasm to the nucleus	1253	Ubiquitin-conjugating enzyme E2 13 OS=Saccharomyces cerevisiae (strain ATCC 204508 / S288c) GN=UBC13 PE=1 SV=1	UBC13_YEAST	17 kDa	NA	0.34	-0.05	15.058	0.701673	15.15	15.25	14.96	15.13	14.92	14.98	15.21	15.01	15	14.97
YDR171W	HSP42	4	806621	807748	W	heat shock protein HSP42	Small heat shock protein (sHSP) with chaperone activity; forms barrel-shaped oligomers that suppress unfolded protein aggregation; involved in cytoskeleton reorganization after heat shock; protein abundance increases and forms cytoplasmic foci in response to DNA replication stress	2170	Heat shock protein 42 OS=Saccharomyces cerevisiae (strain ATCC 204508 / S288c) GN=HSP42 PE=1 SV=1	HSP42_YEAST	43 kDa	NA	0.77	-0.05	11.41	0.925	11.44	11.52	11.36	11.52	11.22	11.19	11.88	11.32	11.41	11.24
YDR272W	GLO2	4	1009010	1009834	W	hydroxyacylglutathione hydrolase GLO2	Cytoplasmic glyoxalase II; catalyzes the hydrolysis of S-D-lactoylglutathione into glutathione and D-lactate; GLO2 has a paralog, GLO4, that arose from the whole genome duplication	325	Hydroxyacylglutathione hydrolase, cytoplasmic isozyme OS=Saccharomyces cerevisiae (strain ATCC 204508 / S288c) GN=GLO2 PE=1 SV=1	GLO2_YEAST	31 kDa	NA	0.023	-0.05	14.546	0.184427	14.62	14.72	14.48	14.55	14.48	14.43	14.59	14.56	14.53	14.5
YDR305C	HNT2	4	1072746	1073488	C	bis(5'-adenosyl)-triphosphatase|APH1	Dinucleoside triphosphate hydrolase; has similarity to the tumor suppressor FHIT and belongs to the histidine triad (HIT) superfamily of nucleotide-binding proteins	1654	Bis(5'-adenosyl)-triphosphatase OS=Saccharomyces cerevisiae (strain ATCC 204508 / S288c) GN=HNT2 PE=1 SV=2	HNT2_YEAST	24 kDa	NA	0.53	-0.05	13.93	0.837523	14.03	14.11	13.83	13.84	13.95	13.73	14.19	13.93	13.82	13.87
YDR321W	ASP1	4	1108702	1109847	W	asparaginase ASP1	Cytosolic L-asparaginase, involved in asparagine catabolism; catalyzes hydrolysis of L-asparagine to aspartic acid and ammonia; important enzyme for the treatment of acute lymphoblastic leukemia; has low glutaminase activity and dependence; synthesized constitutively	734	L-asparaginase 1 OS=Saccharomyces cerevisiae (strain ATCC 204508 / S288c) GN=ASP1 PE=1 SV=1	ASPG1_YEAST	41 kDa	NA	0.14	-0.05	12.453	0.488679	12.58	12.52	12.39	12.43	12.49	12.48	12.28	12.46	12.41	12.49
YDR330W	UBX5	4	1127872	1129374	W		UBX domain-containing protein that interacts with Cdc48p; ubiquitin regulatory X is also known as UBX	1316	UBX domain-containing protein 5 OS=Saccharomyces cerevisiae (strain ATCC 204508 / S288c) GN=UBX5 PE=1 SV=1	UBX5_YEAST	57 kDa	TRUE	0.37	-0.05	13.353	0.725985	13.45	13.46	13.22	13.35	13.36	13.17	13.71	13.31	13.16	13.34
YDR430C	CYM1	4	1325501	1328470	C	MOP112	Lysine-specific metalloprotease of the pitrilysin family; metalloprotease of the intermembrane space; degrades proteins and presequence peptides cleaved from imported proteins; required for normal mitochondrial morphology	1571	Mitochondrial presequence protease OS=Saccharomyces cerevisiae (strain ATCC 204508 / S288c) GN=CYM1 PE=1 SV=2	CYM1_YEAST	112 kDa	NA	0.49	-0.05	13.499	0.808344	13.41	13.28	13.87	13.64	13.43	13.53	13.61	13.37	13.46	13.39
YDR449C	UTP6	4	1357580	1358902	C	snoRNA-binding rRNA-processing protein UTP6	Nucleolar protein; component of the small subunit (SSU) processome containing the U3 snoRNA that is involved in processing of pre-18S rRNA	2198	U3 small nucleolar RNA-associated protein 6 OS=Saccharomyces cerevisiae (strain ATCC 204508 / S288c) GN=UTP6 PE=1 SV=2	UTP6_YEAST	52 kDa	NA	0.79	-0.05	12.233	0.93643	11.77	11.72	12.78	12.35	12.59	12.83	11.67	11.92	12.49	12.21
YDR464W	SPP41	4	1388872	1393179	W		Protein of unknown function; involved in negative regulation of expression of spliceosome components PRP4 and PRP3; relocalizes to the cytosol in response to hypoxia	1716	Protein SPP41 OS=Saccharomyces cerevisiae (strain ATCC 204508 / S288c) GN=SPP41 PE=1 SV=2	SPP41_YEAST	162 kDa	NA	0.57	-0.05	12.203	0.856819	12.31	12.18	12.18	12.34	12.13	12.15	12.46	11.98	12.11	12.19
YDR468C	TLG1	4	1398026	1398700	C		Essential t-SNARE that mediates fusion of vesicles with the late Golgi; forms a complex with Tlg2p and Vti1p; mediates fusion of endosome-derived vesicles with the late Golgi; binds the docking complex VFT (Vps fifty-three) through interaction with Vps51p	2516	T-SNARE affecting a late Golgi compartment protein 1 OS=Saccharomyces cerevisiae (strain ATCC 204508 / S288c) GN=TLG1 PE=1 SV=1	TLG1_YEAST	26 kDa	NA	0.94	-0.05	11.416	0.976966	11.45	11.25	11.63	11.46	11.41	11.24	11.6	11.36	11.53	11.23
YDR477W	SNF1	4	1412373	1414274	W	AMP-activated serine/threonine-protein kinase catalytic subunit SNF1|PAS14|HAF3|GLC2|CCR1|CAT1	AMP-activated S/T protein kinase; forms a complex with Snf4p and members of the Sip1p/Sip2p/Gal83p family; required for transcription of glucose-repressed genes, thermotolerance, sporulation, and peroxisome biogenesis; regulates nucleocytoplasmic shuttling of Hxk2p; regulates filamentous growth and acts as a non-canonical GEF, activating Arf3p during invasive growth; SUMOylation by Mms21p inhibit…	1416	Carbon catabolite-derepressing protein kinase OS=Saccharomyces cerevisiae (strain ATCC 204508 / S288c) GN=SNF1 PE=1 SV=1	SNF1_YEAST	72 kDa	NA	0.41	-0.05	13.287	0.7494	13.29	13.06	13.6	13.32	13.48	13.52	12.6	13.15	13.44	13.41
YEL026W	SNU13	5	101943	102323	W	RNA binding protein SNU13	RNA binding protein; part of U3 snoRNP involved in rRNA processing, part of U4/U6-U5 tri-snRNP involved in mRNA splicing, similar to human 15.5K protein	873	13 kDa ribonucleoprotein-associated protein OS=Saccharomyces cerevisiae (strain ATCC 204508 / S288c) GN=SNU13 PE=1 SV=1	SNU13_YEAST	14 kDa	NA	0.19	-0.05	15.401	0.560478	15.55	15.6	15.26	15.37	15.34	15.3	15.56	15.32	15.38	15.33
YEL034W	HYP2	5	85676	86149	W	translation elongation factor eIF-5A|eIF-5A|eIF5A|TIF51A	Translation elongation factor eIF-5A; required for translation of proteins containing polyproline stretches, including Bni1p, and this leads to a requirement for mating projection formation; structural homolog of bacterial EF-P; undergoes an essential hypusination modification; HYP2 has a paralog, ANB1, that arose from the whole genome duplication; human EIF5A complements the inviability of the y…	2442	Cluster of Eukaryotic translation initiation factor 5A-1 OS=Saccharomyces cerevisiae (strain ATCC 204508 / S288c) GN=HYP2 PE=1 SV=3 (IF5A1_YEAST)	IF5A1_YEAST [2]	17 kDa	TRUE	0.9	-0.05	12.448	0.965217	12.56	12.4	12.4	12.32	12.42	11.97	13.41	12.33	12.46	12.21
YER018C	SPC25	5	191959	192624	C	kinetochore-associated Ndc80 complex subunit SPC25	Component of the kinetochore-associated Ndc80 complex; involved in chromosome segregation, spindle checkpoint activity, and kinetochore clustering; evolutionarily conserved; other members include Ndc80p, Nuf2p, Spc24p, and Spc25p	1436	Kinetochore protein SPC25 OS=Saccharomyces cerevisiae (strain ATCC 204508 / S288c) GN=SPC25 PE=1 SV=1	SPC25_YEAST	25 kDa	NA	0.42	-0.05	12.653	0.758577	12.7	12.67	12.63	12.73	12.61	12.49	12.73	12.7	12.74	12.53
YER114C	BOI2	5	390590	393712	C	BEB1	Protein implicated in polar growth, functionally redundant with Boi1p; interacts with bud-emergence protein Bem1p; contains an SH3 (src homology 3) domain and a PH (pleckstrin homology) domain; BOI2 has a paralog, BOI1, that arose from the whole genome duplication	2360	Protein BOI2 OS=Saccharomyces cerevisiae (strain ATCC 204508 / S288c) GN=BOI2 PE=1 SV=1	BOI2_YEAST	116 kDa	NA	0.87	-0.05	12.453	0.957629	12.42	12.29	12.72	12.43	12.5	12.32	12.5	12.56	12.45	12.34
YER117W	RPL23B	5	396769	397653	W	uL14|ribosomal 60S subunit protein L23B|L14|YL32|L23B|L17aB	Ribosomal 60S subunit protein L23B; homologous to mammalian ribosomal protein L23 and bacterial L14; RPL23B has a paralog, RPL23A, that arose from the whole genome duplication	754	60S ribosomal protein L23-B OS=Saccharomyces cerevisiae (strain ATCC 204508 / S288c) GN=RPL23B PE=1 SV=1	RL23B_YEAST	14 kDa	NA	0.15	-0.05	13.169	0.507843	13.3	13.36	13.06	13.16	13.09	13.07	13.32	13.1	13.1	13.13
YER156C	YER156C	5	483325	484341	C		Putative protein of unknown function; interacts with Hsp82p and copurifies with Ipl1p; expression is copper responsive and downregulated in strains deleted for MAC1, a copper-responsive transcription factor; similarity to mammalian MYG1	291	UPF0160 protein YER156C OS=Saccharomyces cerevisiae (strain ATCC 204508 / S288c) GN=YER156C PE=1 SV=1	YEY6_YEAST	38 kDa	NA	0.018	-0.05	14.752	0.159658	14.86	14.9	14.66	14.76	14.72	14.7	14.79	14.73	14.69	14.71
YFR014C	CMK1	6	172537	173877	C	calmodulin-dependent protein kinase CMK1	Calmodulin-dependent protein kinase; may play a role in stress response, many Ca++/calmodulin dependent phosphorylation substrates demonstrated in vitro, amino acid sequence similar to mammalian Cam Kinase II; CMK1 has a paralog, CMK2, that arose from the whole genome duplication	1440	Calcium/calmodulin-dependent protein kinase I OS=Saccharomyces cerevisiae (strain ATCC 204508 / S288c) GN=CMK1 PE=1 SV=2	KCC1_YEAST	50 kDa	NA	0.42	-0.05	14.559	0.758577	14.61	14.68	14.58	14.59	14.46	14.58	14.49	14.6	14.49	14.51
YGL101W	YGL101W	7	312193	312840	W		Protein of unknown function; non-essential gene; interacts with the DNA helicase Hpr5p; YGL101W has a paralog, YBR242W, that arose from the whole genome duplication	2406	HD domain-containing protein YGL101W OS=Saccharomyces cerevisiae (strain ATCC 204508 / S288c) GN=YGL101W PE=1 SV=1	YGK1_YEAST	25 kDa	NA	0.89	-0.05	13.785	0.962464	13.83	13.92	13.67	13.83	13.78	13.66	13.83	13.8	13.61	13.92
YGL157W	ARI1	7	209006	210049	W	carbonyl reductase (NADPH-dependent) ARI1	NADPH-dependent aldehyde reductase; utilizes aromatic and alophatic aldehyde substrates; member of the short-chain dehydrogenase/reductase superfamily	889	NADPH-dependent aldehyde reductase ARI1 OS=Saccharomyces cerevisiae (strain ATCC 204508 / S288c) GN=ARI1 PE=1 SV=1	ARI1_YEAST	38 kDa	TRUE	0.2	-0.05	14.423	0.571744	14.52	14.61	14.3	14.44	14.36	14.37	14.54	14.36	14.37	14.36
YGL197W	MDS3	7	124698	129161	W		Putative component of the TOR regulatory pathway; negative regulator of early meiotic gene expression; required, with Pmd1p, for growth under alkaline conditions; has an N-terminal kelch-like domain; MDS3 has a paralog, PMD1, that arose from the whole genome duplication	1219	Negative regulator of sporulation MDS3 OS=Saccharomyces cerevisiae (strain ATCC 204508 / S288c) GN=MDS3 PE=1 SV=2	MDS3_YEAST	167 kDa	NA	0.33	-0.05	13.518	0.695443	13.45	13.44	13.86	13.46	13.62	13.4	13.43	13.48	13.56	13.48
YGL201C	MCM6	7	117854	120907	C	MCM DNA helicase complex subunit MCM6	Protein involved in DNA replication; component of the Mcm2-7 hexameric helicase complex that binds chromatin as a part of the pre-replicative complex; forms a subcomplex with Mcm4p and Mcm7p	1343	DNA replication licensing factor MCM6 OS=Saccharomyces cerevisiae (strain ATCC 204508 / S288c) GN=MCM6 PE=1 SV=2	MCM6_YEAST	113 kDa	NA	0.38	-0.05	11.072	0.729577	10.93	10.82	11.52	11	11.25	10.99	11	11	11.12	11.09
YGR126W	YGR126W	7	745835	746527	W		Putative protein of unknown function; green fluorescent protein (GFP)-fusion protein localizes to both the cytoplasm and the nucleus and is induced in response to the DNA-damaging agent MMS	1325	Uncharacterized protein YGR126W OS=Saccharomyces cerevisiae (strain ATCC 204508 / S288c) GN=YGR126W PE=1 SV=1	YG36_YEAST	26 kDa	NA	0.37	-0.05	12.845	0.725985	12.9	12.92	12.87	12.78	12.88	12.63	13.04	12.85	12.78	12.8
YGR167W	CLC1	7	832456	833157	W	SCD4	Clathrin light chain; subunit of the major coat protein involved in intracellular protein transport and endocytosis; regulates endocytic progression; thought to regulate clathrin function; the clathrin triskelion is a trimeric molecule composed of three heavy chains that radiate from a vertex and three light chains which bind noncovalently near the vertex of the triskelion	1678	Clathrin light chain OS=Saccharomyces cerevisiae (strain ATCC 204508 / S288c) GN=CLC1 PE=1 SV=1	CLC1_YEAST	27 kDa	NA	0.55	-0.05	13.031	0.84994	13.19	13.15	12.9	13	12.93	12.85	13.42	12.97	12.99	12.91
YGR208W	SER2	7	911883	912812	W	phosphoserine phosphatase	Phosphoserine phosphatase of the phosphoglycerate pathway; involved in serine and glycine biosynthesis, expression is regulated by the available nitrogen source	709	Phosphoserine phosphatase OS=Saccharomyces cerevisiae (strain ATCC 204508 / S288c) GN=SER2 PE=1 SV=1	SERB_YEAST	34 kDa	NA	0.13	-0.05	14.216	0.470909	14.3	14.34	14.13	14.23	14.19	14.11	14.22	14.24	14.24	14.16
YGR277C	CAB4	7	1045644	1046561	C	putative pantetheine-phosphate adenylyltransferase	Subunit of the CoA-Synthesizing Protein Complex (CoA-SPC); subunits of this complex are: Cab2p, Cab3p, Cab4p, Cab5p, Sis2p and Vhs3p; probable pantetheine-phosphate adenylyltransferase (PPAT); PPAT catalyzes the fourth step in the biosynthesis of coenzyme A from pantothenate; null mutant lethality is complemented by E. coli coaD (encoding PPAT) and by human COASY	1605	Phosphopantetheine adenylyltransferase OS=Saccharomyces cerevisiae (strain ATCC 204508 / S288c) GN=CAB4 PE=1 SV=1	COAD_YEAST	34 kDa	NA	0.51	-0.05	13.09	0.821966	13.12	13.18	12.96	13.11	13.17	13.17	12.8	13.13	13.04	13.22
YHR005C-A	TIM10	8	115620	115901	C	protein transporter TIM10|MRS11	Essential protein of the mitochondrial intermembrane space; forms a complex with Tim9p (TIM10 complex) that delivers hydrophobic proteins to the TIM22 complex for insertion into the inner membrane	1287	Mitochondrial import inner membrane translocase subunit TIM10 OS=Saccharomyces cerevisiae (strain ATCC 204508 / S288c) GN=TIM10 PE=1 SV=1	TIM10_YEAST	10 kDa	NA	0.36	-0.05	15.147	0.720556	15.29	15.37	15.07	15.11	15.06	15.06	15.06	15.13	15.26	15.06
YHR128W	FUR1	8	362115	362765	W	uracil phosphoribosyltransferase	Uracil phosphoribosyltransferase; synthesizes UMP from uracil; involved in the pyrimidine salvage pathway	1065	Uracil phosphoribosyltransferase OS=Saccharomyces cerevisiae (strain ATCC 204508 / S288c) GN=FUR1 PE=1 SV=2	UPP_YEAST	25 kDa	NA	0.26	-0.05	14.012	0.635283	14.13	14.23	13.88	14.03	13.88	13.93	14.08	13.99	13.98	13.99
YHR148W	IMP3	8	393534	394085	W	snoRNA-binding rRNA-processing protein IMP3	Component of the SSU processome; SSU processome is required for pre-18S rRNA processing, essential protein that interacts with Mpp10p and mediates interactions of Imp4p and Mpp10p with U3 snoRNA	1131	U3 small nucleolar ribonucleoprotein protein IMP3 OS=Saccharomyces cerevisiae (strain ATCC 204508 / S288c) GN=IMP3 PE=1 SV=1	IMP3_YEAST	22 kDa	NA	0.29	-0.05	13.968	0.662346	14.02	14.07	13.87	14.03	13.95	13.79	14.26	13.89	13.89	13.91
YHR158C	KEL1	8	413685	417179	C		Protein required for proper cell fusion and cell morphology; forms a complex with Bud14p and Kel2p that regulates Bnr1p (formin) to affect actin cable assembly, cytokinesis, and polarized growth; functions in a complex with Kel2p to negatively regulate mitotic exit, interacts with Tem1p and Lte1p; localizes to regions of polarized growth; potential Cdc28p substrate	642	Kelch repeat-containing protein 1 OS=Saccharomyces cerevisiae (strain ATCC 204508 / S288c) GN=KEL1 PE=1 SV=1	KEL1_YEAST	131 kDa	NA	0.11	-0.05	12.677	0.438983	12.78	12.66	12.68	12.76	12.62	12.58	12.78	12.59	12.59	12.73
YIL010W	DOT5	9	334882	335529	W	thioredoxin peroxidase DOT5	Nuclear thiol peroxidase; functions as an alkyl-hydroperoxide reductase during post-diauxic growth	1960	Peroxiredoxin DOT5 OS=Saccharomyces cerevisiae (strain ATCC 204508 / S288c) GN=DOT5 PE=1 SV=1	DOT5_YEAST	24 kDa	NA	0.67	-0.05	14.821	0.888986	14.92	14.98	14.76	14.8	14.72	14.68	15.09	14.82	14.77	14.67
YIL021W	RPB3	9	312905	313861	W	DNA-directed RNA polymerase II core subunit RPB3|B44	RNA polymerase II third largest subunit B44; part of central core; similar to prokaryotic alpha subunit	744	DNA-directed RNA polymerase II subunit RPB3 OS=Saccharomyces cerevisiae (strain ATCC 204508 / S288c) GN=RPB3 PE=1 SV=2	RPB3_YEAST	35 kDa	NA	0.14	-0.05	13.703	0.488679	13.82	13.87	13.64	13.7	13.61	13.54	13.81	13.72	13.61	13.71
YIL027C	EMC5	9	303679	304104	C	KRE27	Member of conserved ER transmembrane complex; required for efficient folding of proteins in the ER; null mutant displays induction of the unfolded protein response, and also shows K1 killer toxin resistance; homologous to worm B0334.15/EMC-5, fly CG15168, human MMGT	1427	ER membrane protein complex subunit 5 OS=Saccharomyces cerevisiae (strain ATCC 204508 / S288c) GN=EMC5 PE=1 SV=1	EMC5_YEAST	16 kDa	NA	0.41	-0.05	14.082	0.7494	13.98	14.09	14.36	14.11	14.06	14.3	13.77	14.03	14.09	14.03
YIL034C	CAP2	9	289226	290089	C	F-actin-capping protein subunit beta	Beta subunit of the capping protein heterodimer (Cap1p and Cap2p); capping protein (CP) binds to the barbed ends of actin filaments preventing further polymerization; localized predominantly to cortical actin patches; protein increases in abundance and relocalizes from bud neck to plasma membrane upon DNA replication stress	1431	F-actin-capping protein subunit beta OS=Saccharomyces cerevisiae (strain ATCC 204508 / S288c) GN=CAP2 PE=1 SV=3	CAPZB_YEAST	33 kDa	NA	0.42	-0.05	13.527	0.758577	13.63	13.68	13.48	13.48	13.43	13.41	13.71	13.62	13.41	13.42
YIL044C	AGE2	9	272950	273846	C	SAT2	ADP-ribosylation factor (ARF) GTPase activating protein (GAP) effector; involved in Trans-Golgi-Network (TGN) transport; contains C2C2H2 cysteine/histidine motif	1226	ADP-ribosylation factor GTPase-activating protein effector protein 2 OS=Saccharomyces cerevisiae (strain ATCC 204508 / S288c) GN=AGE2 PE=1 SV=1	AGE2_YEAST	33 kDa	NA	0.33	-0.05	12.687	0.695443	12.83	12.8	12.58	12.68	12.59	12.51	12.98	12.7	12.69	12.51
YIL095W	PRK1	9	183937	186369	W	serine/threonine protein kinase PRK1|PAK1	Protein serine/threonine kinase; regulates the organization and function of the actin cytoskeleton and reduces endocytic ability of cell through the phosphorylation of the Pan1p-Sla1p-End3p protein complex; PRK1 has a paralog, ARK1, that arose from the whole genome duplication	1220	Actin-regulating kinase PRK1 OS=Saccharomyces cerevisiae (strain ATCC 204508 / S288c) GN=PRK1 PE=1 SV=1	PRK1_YEAST	91 kDa	TRUE	0.33	-0.05	13.347	0.695443	13.4	13.35	13.32	13.39	13.45	13.49	13.16	13.35	13.3	13.26
YJL068C	YJL068C	10	313016	313915	C	S-formylglutathione hydrolase|SFGH	Esterase that can function as an S-formylglutathione hydrolase; non-essential intracellular esterase; may be involved in the detoxification of formaldehyde, which can be metabolized to S-formylglutathione; similar to human esterase D	573	S-formylglutathione hydrolase OS=Saccharomyces cerevisiae (strain ATCC 204508 / S288c) GN=YJL068C PE=1 SV=1	SFGH_YEAST	34 kDa	NA	0.088	-0.05	13.648	0.401268	13.75	13.77	13.55	13.66	13.6	13.58	13.64	13.64	13.64	13.65
YJL159W	HSP150	10	120449	121690	W	heat shock protein HSP150|PIR2|ORE1|CCW7	O-mannosylated heat shock protein; secreted and covalently attached to the cell wall via beta-1,3-glucan and disulfide bridges; required for cell wall stability; induced by heat shock, oxidative stress, and nitrogen limitation; HSP150 has a paralog, PIR3, that arose from the whole genome duplication	1513	Cluster of Cell wall mannoprotein HSP150 OS=Saccharomyces cerevisiae (strain ATCC 204508 / S288c) GN=HSP150 PE=1 SV=2 (HS150_YEAST)	HS150_YEAST [5]	41 kDa	TRUE	0.46	-0.05	12.559	0.790577	12.85	12.47	13.01	12.41	12.4	12.24	12.78	12.54	12.42	12.47
YJL179W	PFD1	10	88787	89116	W	prefolding complex chaperone subunit|GIM6	Subunit of heterohexameric prefoldin; prefoldin binds cytosolic chaperonin and transfers target proteins to it; involved in the biogenesis of actin and of alpha- and gamma-tubulin; prefoldin complex also localizes to chromatin of actively transcribed genes in the nucleus and facilitates transcriptional elongation	1449	Prefoldin subunit 1 OS=Saccharomyces cerevisiae (strain ATCC 204508 / S288c) GN=PFD1 PE=1 SV=2	PFD1_YEAST	13 kDa	NA	0.43	-0.05	14.532	0.76754	14.64	14.7	14.41	14.51	14.45	14.38	14.75	14.53	14.52	14.43
YJR070C	LIA1	10	569621	570598	C	MMD1	Deoxyhypusine hydroxylase; HEAT-repeat containing metalloenzyme that catalyzes hypusine formation; binds to and is required for the modification of Hyp2p (eIF5A); complements S. pombe mmd1 mutants defective in mitochondrial positioning; protein abundance increases in response to DNA replication stress	1195	Deoxyhypusine hydroxylase OS=Saccharomyces cerevisiae (strain ATCC 204508 / S288c) GN=LIA1 PE=1 SV=1	DOHH_YEAST	36 kDa	NA	0.32	-0.05	13.18	0.685525	13.27	13.25	13.14	13.23	13.13	13.01	13.44	13.12	13.13	13.08
YJR099W	YUH1	10	615576	616286	W	ubiquitin-specific protease YUH1	Ubiquitin C-terminal hydrolase; cleaves ubiquitin-protein fusions to generate monomeric ubiquitin; hydrolyzes the peptide bond at the C-terminus of ubiquitin; also the major processing enzyme for the ubiquitin-like protein Rub1p	1186	Ubiquitin carboxyl-terminal hydrolase YUH1 OS=Saccharomyces cerevisiae (strain ATCC 204508 / S288c) GN=YUH1 PE=1 SV=1	UBL1_YEAST	26 kDa	NA	0.31	-0.05	12.601	0.678698	12.71	12.81	12.41	12.67	12.52	12.51	12.73	12.64	12.48	12.53
YJR133W	XPT1	10	672991	673620	W	xanthine phosphoribosyltransferase	Xanthine-guanine phosphoribosyl transferase; required for xanthine utilization and for optimal utilization of guanine	1446	Xanthine phosphoribosyltransferase 1 OS=Saccharomyces cerevisiae (strain ATCC 204508 / S288c) GN=XPT1 PE=1 SV=1	XPT1_YEAST	24 kDa	NA	0.43	-0.05	14.976	0.76754	15.04	15.13	14.9	14.99	14.91	14.88	15.18	14.94	14.94	14.85
YJR144W	MGM101	10	700882	701691	W	MGM9	Protein with a role in mitochondrial DNA recombinational repair; also involved in interstrand cross-link repair; binds to and catalyzes the annealing of single-stranded mtDNA; oligomerizes to form rings and filaments; related to Rad52-type recombination proteins, with limited overall similarity but sharing conserved functionally important residues; component of the mitochondrial nucleoid, require…	637	Mitochondrial genome maintenance protein MGM101 OS=Saccharomyces cerevisiae (strain ATCC 204508 / S288c) GN=MGM101 PE=1 SV=1	MG101_YEAST	30 kDa	NA	0.11	-0.05	14.514	0.438983	14.65	14.73	14.46	14.43	14.42	14.45	14.68	14.51	14.43	14.38
YKL022C	CDC16	11	394726	397248	C	anaphase promoting complex subunit CDC16	Subunit of the anaphase-promoting complex/cyclosome (APC/C); which is a ubiquitin-protein ligase required for degradation of anaphase inhibitors, including mitotic cyclins, during the metaphase/anaphase transition; required for sporulation; relocalizes to the cytosol in response to hypoxia	2146	Anaphase-promoting complex subunit CDC16 OS=Saccharomyces cerevisiae (strain ATCC 204508 / S288c) GN=CDC16 PE=1 SV=1	CDC16_YEAST	95 kDa	NA	0.76	-0.05	12.413	0.921536	12.56	12.01	12.61	12.52	12.44	12.33	12.56	12.28	12.5	12.32
YKL063C	YKL063C	11	321015	321518	C		Putative protein of unknown function; green fluorescent protein (GFP)-fusion protein localizes to the Golgi	846	Uncharacterized protein YKL063C OS=Saccharomyces cerevisiae (strain ATCC 204508 / S288c) GN=YKL063C PE=1 SV=1	YKG3_YEAST	19 kDa	NA	0.18	-0.05	13.89	0.549764	13.93	14.1	13.83	13.93	13.8	13.92	13.8	13.79	13.89	13.91
YKL128C	PMU1	11	200884	201771	C	putative phosphomutase	Putative phosphomutase; contains a region homologous to the active site of phosphomutases; overexpression suppresses the histidine auxotrophy of an ade3 ade16 ade17 triple mutant and the temperature sensitivity of a tps2 mutant	971	Probable phosphoglycerate mutase PMU1 OS=Saccharomyces cerevisiae (strain ATCC 204508 / S288c) GN=PMU1 PE=1 SV=1	PMU1_YEAST	34 kDa	NA	0.23	-0.05	13.645	0.607237	13.8	13.85	13.5	13.6	13.63	13.62	13.51	13.68	13.51	13.75
[truncated: 1,861 more rows]
