# Supplementary material for: Simultaneous quantification of mRNA and protein in single cells reveals post-transcriptional effects of genetic variation
Source: eLife journal article supplement (doi:10.7554/elife.60645), 2020-11-16
Supplement: supp [file elife-60645-supp-v1.zip › elife_poa_e60645_Figure_7_source_data_3.xlsx]

## Sheet: Sheet1
SourceData_07_3: Comparison of differential expression in mRNA versus protein (BY YAK1-Q578* compared to BY YAK1-WT, used in Figure 7 and S14)
sysname	name	chromosome	position_up	position_down	strand	alias	annotation	RNA_mean	RNA_log2FC	RNA_pvalue	RNA_adjusted_pvalue	Prot_mean	Prot_log2FC	Prot_pvalue	Prot_adjusted_pvalue	category
YFL014W	HSP12	6	107256	107585	W	lipid-binding protein HSP12|HOR5|GLP1	Plasma membrane protein involved in maintaining membrane organization; involved in maintaining organization during stress conditions; induced by heat shock, oxidative stress, osmostress, stationary phase, glucose depletion, oleate and alcohol; protein abundance increased in response to DNA replication stress and dietary restriction; regulated by the HOG and Ras-Pka pathways; required for dietary …	12.2897	-0.431356	8.40488e-13	1.61234e-10	13.625	-0.99	0.0001	0.00438983	RPL
YKL096W	CWP1	11	261132	261851	W	YJU1	Cell wall mannoprotein that localizes to birth scars of daughter cells; linked to a beta-1,3- and beta-1,6-glucan heteropolymer through a phosphodiester bond; required for propionic acid resistance	12.3402	-0.372496	1.43495e-12	2.50247e-10	14.32	-0.61	0.0001	0.00438983	RPL
YDL204W	RTN2	4	94605	95786	W		Reticulon protein; involved in nuclear pore assembly and maintenance of tubular ER morphology; promotes membrane curvature; regulates the ER asymmetry-induced inheritance block during ER stress; role in ER-derived peroxisomal biogenesis; interacts with Sec6p, Yip3p, and Sbh1p; less abundant than RTN1; member of RTNLA (reticulon-like A) subfamily; protein increases in abundance and relocalizes to …	9.42909	-0.166151	0.00107892	0.0163831	11.525	-0.6	0.0001	0.00438983	RPL
YBR006W	UGA2	2	247010	248503	W	succinate-semialdehyde dehydrogenase (NAD(P)(+))|UGA5	Succinate semialdehyde dehydrogenase; involved in the utilization of gamma-aminobutyrate (GABA) as a nitrogen source; part of the 4-aminobutyrate and glutamate degradation pathways; localized to the cytoplasm	10.5134	-0.198373	8.79774e-06	0.000377843	14.426	-0.5	0.0001	0.00438983	RPL
YML128C	MSC1	13	15135	16676	C		Protein of unknown function; mutant is defective in directing meiotic recombination events to homologous chromatids; the authentic, non-tagged protein is detected in highly purified mitochondria and is phosphorylated	11.5726	-0.384564	3.3938e-09	3.42655e-07	14.036	-0.5	0.0001	0.00438983	RPL
YIR038C	GTT1	9	423809	424513	C	bifunctional glutathione transferase/peroxidase	ER associated glutathione S-transferase; capable of homodimerization; glutathione transferase for Yvc1p vacuolar cation channel; expression induced during the diauxic shift and throughout stationary phase; functional overlap with Gtt2p, Grx1p, and Grx2p	10.9822	-0.425782	1.00671e-25	1.15872e-22	13.361	-0.4	0.0001	0.00438983	RPL
YGR088W	CTT1	7	654634	656322	W	catalase T|SPS101	Cytosolic catalase T; has a role in protection from oxidative damage by hydrogen peroxide	10.3438	-0.434671	8.68093e-15	2.49794e-12	12.512	-0.39	0.0001	0.00438983	RPL
YER110C	KAP123	5	378762	382103	C	YRB4	Karyopherin beta; mediates nuclear import of ribosomal proteins prior to assembly into ribosomes and import of histones H3 and H4; localizes to the nuclear pore, nucleus, and cytoplasm; exhibits genetic interactions with RAI1	14.2231	-0.140017	8.09836e-05	0.00229726	14.186	-0.35	0.0001	0.00438983	RPL
YER062C	GPP2	5	279930	280682	C	HOR2|glycerol-1-phosphatase HOR2	DL-glycerol-3-phosphate phosphatase involved in glycerol biosynthesis; also known as glycerol-1-phosphatase; induced in response to hyperosmotic or oxidative stress, and during diauxic shift; GPP2 has a paralog, GPP1, that arose from the whole genome duplication	12.4811	-0.389264	1.99019e-13	4.24206e-11	13.385	-0.3	0.0001	0.00438983	RPL
YPR036W	VMA13	16	643836	645272	W	H(+)-transporting V1 sector ATPase subunit H|CLS11	Subunit H of the V1 peripheral membrane domain of V-ATPase; part of the electrogenic proton pump found throughout the endomembrane system; serves as an activator or a structural stabilizer of the V-ATPase; the V1 peripheral membrane domain of the vacuolar H+-ATPase (V-ATPase) has eight subunits	14.3906	-0.109858	0.000361986	0.00710999	13.644	-0.28	0.00054	0.01665	RPL
YNL160W	YGP1	14	336545	337609	W		Cell wall-related secretory glycoprotein; induced by nutrient deprivation-associated growth arrest and upon entry into stationary phase; may be involved in adaptation prior to stationary phase entry; YGP1 has a paralog, SPS100, that arose from the whole genome duplication	13.8199	-0.291849	5.45005e-06	0.000248929	12.675	-0.25	0.0001	0.00438983	RPL
YPR043W	RPL43A	16	654166	654847	W	eL43|ribosomal 60S subunit protein L43A|L43e|L43A	Ribosomal 60S subunit protein L43A; null mutation confers a dominant lethal phenotype; homologous to mammalian ribosomal protein L37A, no bacterial homolog; RPL43A has a paralog, RPL43B, that arose from the whole genome duplication	15.1431	-0.155065	4.1118e-05	0.00138383	13.972	-0.25	0.002	0.0329936	RPL
YOR317W	FAA1	15	909343	911445	W	long-chain fatty acid-CoA ligase FAA1	Long chain fatty acyl-CoA synthetase; activates fatty acids with a preference for C12:0-C16:0 chain lengths; role in the competitive import of long-chain fatty acids and sphingoid long-chain bases; accounts for most acyl-CoA synthetase activity; localizes to lipid particles and the plasma membrane; role in sphingolipid-to-glycerolipid metabolism; forms ER foci upon replication stress; faa1 faa4 d…	13.4897	-0.146716	0.000716963	0.0121356	14.255	-0.24	0.00025	0.00938406	RPL
YNL141W	AAH1	14	359596	360639	W	adenine deaminase	Adenine deaminase (adenine aminohydrolase); converts adenine to hypoxanthine; involved in purine salvage; transcriptionally regulated by nutrient levels and growth phase; Aah1p degraded upon entry into quiescence via SCF and the proteasome	12.9616	-0.367657	2.32202e-24	2.2272e-21	13.617	-0.23	0.0001	0.00438983	RPL
YGR189C	CRH1	7	876669	878192	C	transglycosylase	Chitin transglycosylase; functions in the transfer of chitin to beta(1-6) and beta(1-3) glucans in the cell wall; similar and functionally redundant to Utr2; localizes to sites of polarized growth; expression induced by cell wall stress	13.7929	-0.145153	0.000628671	0.0111323	14.222	-0.22	0.001	0.0181119	RPL
YML001W	YPT7	13	267174	267800	W	Rab family GTPase YPT7|VAM4|AST4	Rab family GTPase; GTP-binding protein of the rab family; required for homotypic fusion event in vacuole inheritance, for endosome-endosome fusion; localizes to sites of contact between the vacuole and mitochondria (vCLAMPs); interacts with the cargo selection/retromer complex for retrograde sorting; similar to mammalian Rab7	12.0306	-0.119375	0.00118012	0.0174143	14.681	-0.22	0.0001	0.00438983	RPL
YMR305C	SCW10	13	879063	880232	C	putative family 17 glucosidase	Cell wall protein with similarity to glucanases; may play a role in conjugation during mating based on mutant phenotype and its regulation by Ste12p; SWC10 has a paralog, SCW4, that arose from the whole genome duplication	14.3167	-0.181468	5.18977e-09	4.81728e-07	14.04	-0.22	0.002	0.0329936	RPL
YER088C	DOT6	5	333176	335188	C	PBF2	Protein involved in rRNA and ribosome biogenesis; activated in stochastic pulses of nuclear localization; binds polymerase A and C motif; subunit of the RPD3L histone deacetylase complex; has chromatin specific SANT domain; involved in telomeric gene silencing and filamentation; relative distribution to the nucleus increases upon DNA replication stress	12.8112	-0.156884	4.24793e-05	0.00141311	10.078	-0.21	0.00057	0.016969	RPL
YPR010C	RPA135	16	577585	581196	C	DNA-directed RNA polymerase I core subunit RPA135|A135|SRP3|RRN2|RPA2	RNA polymerase I second largest subunit A135	14.9508	-0.0932376	0.00265377	0.0322111	13.696	-0.19	0.003	0.047378	RPL
YFR006W	YFR006W	6	156145	157752	W	putative Xaa-Pro dipeptidase	Putative X-Pro aminopeptidase; green fluorescent protein (GFP)-fusion protein localizes to the cytoplasm; YFR006W is not an essential gene	11.9521	-0.121695	6.35118e-05	0.00196511	12.898	-0.18	0.001	0.0181119	RPL
YKL216W	URA1	11	25215	26159	W	dihydroorotate dehydrogenase	Dihydroorotate dehydrogenase; catalyzes the fourth enzymatic step in the de novo biosynthesis of pyrimidines, converting dihydroorotic acid into orotic acid	15.4776	-0.202743	4.04004e-08	3.18499e-06	15.87	-0.15	0.0001	0.00438983	RPL
YLR304C	ACO1	12	735212	737548	C	aconitate hydratase ACO1|GLU1	Aconitase; required for the tricarboxylic acid (TCA) cycle and also independently required for mitochondrial genome maintenance; component of the mitochondrial nucleoid; mutation leads to glutamate auxotrophy; human homolog ACO2 can complement yeast null mutant	13.9717	-0.237821	5.55118e-08	4.14896e-06	14.884	-0.15	0.0001	0.00438983	RPL
YOL151W	GRE2	15	43694	44722	W	methylglyoxal reductase (NADPH-dependent) GRE2	3-methylbutanal reductase and NADPH-dependent methylglyoxal reductase; stress induced (osmotic, ionic, oxidative, heat shock and heavy metals); regulated by the HOG pathway; restores resistance to glycolaldehyde by coupling reduction of glycolaldehyde to ethylene glycol and oxidation of NADPH to NADP+; protein abundance increases in response to DNA replication stress; methylglyoxal reductase (NAD…	11.4767	-0.340219	1.66277e-20	1.19616e-17	14.573	-0.15	0.00035	0.0119276	RPL
YCR004C	YCP4	3	119575	120318	C	flavodoxin-like fold family protein	Protein of unknown function; has sequence and structural similarity to flavodoxins; predicted to be palmitoylated; the authentic, non-tagged protein is detected in highly purified mitochondria in high-throughput studies	12.6429	-0.0893934	0.00379818	0.0413946	13.853	-0.12	0.00083	0.0181119	RPL
YDL166C	FAP7	4	163449	164042	C	nucleoside-triphosphatase	Essential NTPase required for small ribosome subunit synthesis; mediates processing of the 20S pre-rRNA at site D in the cytoplasm but associates only transiently with 43S preribosomes via Rps14p; complex with Rps14 is conserved between humans, yeast, and arches; may be the endonuclease for site D; depletion leads to accumulation of pre-40S ribosomes in 80S-like ribosomes; human TAF9 functionally…	11.0957	-0.124353	0.00381191	0.0413946	13.369	-0.12	0.002	0.0329936	RPL
YGR086C	PIL1	7	649598	650617	C	lipid-binding protein PIL1	Eisosome core component; eisosomes are large immobile cell cortex structures associated with endocytosis; detected in phosphorylated state in mitochondria; phosphorylated on Thr233 upon Pkc1p hyperactivation in a Slt2p MAPK-dependent fashion; null mutant shows activation of Pkc1p/Ypk1p stress resistance pathways; member of BAR domain family; protein increases in abundance and relocalizes from pla…	14.3874	-0.137582	0.000358992	0.00709966	13.53	-0.12	0.001	0.0181119	RPL
YDL055C	PSA1	4	355674	356759	C	mannose-1-phosphate guanylyltransferase|SRB1|VIG9|MPG1	GDP-mannose pyrophosphorylase (mannose-1-phosphate guanyltransferase); synthesizes GDP-mannose from GTP and mannose-1-phosphate in cell wall biosynthesis; required for normal cell wall structure	16.1672	-0.185412	5.05737e-08	3.82963e-06	13.598	-0.1	0.001	0.0181119	RPL
YKR046C	PET10	11	524223	525074	C		Protein of unknown function that localizes to lipid particles; localization suggests a role in lipid metabolism; expression pattern suggests a role in respiratory growth; computational analysis of large-scale protein-protein interaction data suggests a role in ATP/ADP exchange	9.78336	0.162292	0.00123835	0.0180423	13.543	0.1	0.001	0.0181119	RPH
YHL034C	SBP1	8	33193	34077	C	SSB1|SSBR1	Protein that binds eIF4G and has a role in repression of translation; has an RGG motif; found in cytoplasmic P bodies; binds to mRNAs under glucose starvation stress, most often in the 5' UTR; found associated with small nucleolar RNAs snR10 and snR11; SBP1 has a paralog, RNP1, that arose from the whole genome duplication	13.9884	0.0992061	0.00366396	0.0403948	15.213	0.11	0.0027	0.0437063	RPH
YER079W	YER079W	5	318920	319552	W		Putative protein of unknown function	9.10742	0.167506	0.00307137	0.0354435	13.941	0.14	0.002	0.0329936	RPH
YBR145W	ADH5	2	533762	534817	W	alcohol dehydrogenase ADH5	Alcohol dehydrogenase isoenzyme V; involved in ethanol production; ADH5 has a paralog, ADH1, that arose from the whole genome duplication	11.8643	0.276314	4.39162e-09	4.14324e-07	15.645	0.18	0.001	0.0181119	RPH
YDR258C	HSP78	4	971808	974243	C	chaperone ATPase HSP78	Oligomeric mitochondrial matrix chaperone; cooperates with Ssc1p in mitochondrial thermotolerance after heat shock; able to prevent the aggregation of misfolded proteins as well as resolubilize protein aggregates	12.0451	0.211376	2.39557e-05	0.000884296	14.302	0.18	0.001	0.0181119	RPH
YMR108W	ILV2	13	484084	486147	W	acetolactate synthase catalytic subunit|THI1|SMR1	Acetolactate synthase; catalyses the first common step in isoleucine and valine biosynthesis and is the target of several classes of inhibitors, localizes to the mitochondria; expression of the gene is under general amino acid control	15.6967	0.105162	0.00020507	0.00473966	14.179	0.19	0.00062	0.0180427	RPH
YPR145W	ASN1	16	822620	824338	W	asparagine synthase (glutamine-hydrolyzing) 1	Asparagine synthetase; catalyzes the synthesis of L-asparagine from L-aspartate in the asparagine biosynthetic pathway; ASN1 has a paralog, ASN2, that arose from the whole genome duplication	15.3935	0.1346	0.000428338	0.00816254	14.299	0.2	0.001	0.0181119	RPH
YDR391C	YDR391C	4	1257358	1258056	C		Putative protein of unknown function; possibly involved in zinc homeostasis; Bdf1p-dependent transcription induced by salt stress; green fluorescent protein (GFP)-fusion protein localizes to both the cytoplasm and the nucleus	10.1805	0.187576	4.79386e-05	0.00154127	13.681	0.22	0.0026	0.0423522	RPH
YGL117W	YGL117W	7	288512	289309	W		Putative protein of unknown function	11.6526	0.2061	0.000140919	0.00352605	13.704	0.22	0.0001	0.00438983	RPH
YGL039W	YGL039W	7	423961	425007	W	carbonyl reductase (NADPH-dependent)	Aldehyde reductase; reduces aliphatic aldehyde substrates using NADH as cofactor; shown to reduce carbonyl compounds to chiral alcohols	11.2045	0.228617	1.53341e-07	1.03064e-05	13.659	0.23	0.00069	0.0181119	RPH
YHL021C	AIM17	8	64462	65859	C	FMP12	Protein of unknown function; the authentic, non-tagged protein is detected in highly purified mitochondria in high-throughput studies; null mutant displays reduced frequency of mitochondrial genome loss	10.83	0.302353	1.11011e-07	7.60556e-06	13.984	0.23	0.001	0.0181119	RPH
YNL134C	YNL134C	14	372451	373581	C		NADH-dependent aldehyde reductase, involved in detoxification of furfural; expression is up-regulated in the presence of furfural and 5-hydroxymethylfurfural, which are compounds generated during lignocellulosic biomass pre-treatment; green fluorescent protein (GFP)-fusion protein localizes to both the cytoplasm and nucleus; protein abundance increases in response to DNA replication stress	12.8524	0.193364	0.000203491	0.00472213	16.561	0.25	0.0001	0.00438983	RPH
YBR046C	ZTA1	2	330507	331511	C	NADPH:quinone reductase	NADPH-dependent quinone reductase; GFP-tagged protein localizes to the cytoplasm and nucleus; has similarity to E. coli quinone oxidoreductase and to human zeta-crystallin	10.8174	0.320476	1.01458e-17	4.49148e-15	14.364	0.27	0.0004	0.01295	RPH
YOR120W	GCY1	15	551114	552052	W	glycerol 2-dehydrogenase (NADP(+)) GCY1|GCY	Glycerol dehydrogenase; involved in an alternative pathway for glycerol catabolism used under microaerobic conditions; also has mRNA binding activity; member of the aldo-keto reductase (AKR) family; human homolog AKR1B1 can complement yeast null mutant; protein abundance increases in response to DNA replication stress; GCY1 has a paralog, YPR1, that arose from the whole genome duplication	10.1191	0.324666	7.69002e-09	6.50825e-07	13.38	0.29	0.0001	0.00438983	RPH
YGR234W	YHB1	7	959904	961103	W	flavohemoglobin|YHB4	Nitric oxide oxidoreductase; flavohemoglobin that plays role in oxidative and nitrosative stress responses; protects against nitration of cellular targets and against cell growth inhibition under aerobic or anaerobic conditions; yeast flavohemoglobin Yhb1p and human homolog neuroglobin NGB protect cells against alpha-synuclein cytotoxicity and aggregate formation; protein increases in abundance, …	13.7523	0.433358	2.23697e-36	4.29125e-33	13.68	0.32	0.0001	0.00438983	RPH
YDR342C	HXT7	4	1154216	1155928	C	hexose transporter HXT7	High-affinity glucose transporter; member of the major facilitator superfamily, nearly identical to Hxt6p, expressed at high basal levels relative to other HXTs, expression repressed by high glucose levels; HXT7 has a paralog, HXT4, that arose from the whole genome duplication	12.1952	-0.505276	6.37646e-15	1.93139e-12	13.451	-0.6	0.056	0.306638	RL
YPL246C	RBD2	16	84509	85297	C	putative rhomboid protease RBD2	Possible rhomboid protease; has similarity to eukaryotic rhomboid proteases including Pcp1p	11.8195	-0.13936	0.000286135	0.00596633	12.132	-0.31	0.16	0.51995	RL
YDL192W	ARF1	4	116321	116866	W	Arf family GTPase ARF1	ADP-ribosylation factor; GTPase of the Ras superfamily involved in regulation of coated vesicle formation in intracellular trafficking within the Golgi; ARF1 has a paralog, ARF2, that arose from the whole genome duplication; arf1 arf2 double null mutation is complemented by human ARF1, ARF4, ARF5, or ARF6	14.4637	-0.127148	0.00478488	0.0486519	11.866	-0.29	0.33	0.695443	RL
YER019W	ISC1	5	192797	194230	W	inositol phosphosphingolipid phospholipase	Inositol phosphosphingolipid phospholipase C; mitochondrial membrane localized; hydrolyzes complex sphingolipids to produce ceramide; activates genes required for non-fermentable carbon source metabolism during diauxic shift; activated by phosphatidylserine, cardiolipin, and phosphatidylglycerol; mediates Na+ and Li+ halotolerance; ortholog of mammalian neutral sphingomyelinase type 2	11.3231	-0.121781	0.00280093	0.0334719	12.698	-0.26	0.29	0.662346	RL
YDL181W	INH1	4	135179	135436	W	ATPase inhibitor	Protein that inhibits ATP hydrolysis by the F1F0-ATP synthase; inhibitory function is enhanced by stabilizing proteins Stf1p and Stf2p; has a calmodulin-binding motif and binds calmodulin in vitro; INH1 has a paralog, STF1, that arose from the whole genome duplication	8.50219	-0.185108	0.00395676	0.0423255	15.304	-0.18	0.091	0.405663	RL
YEL042W	GDA1	5	73771	75327	W	guanosine diphosphatase	Guanosine diphosphatase located in the Golgi; involved in the transport of GDP-mannose into the Golgi lumen, converting GDP to GMP after mannose is transferred to substrates; null mutants are defective in sporulation and pre-meiotic S phase entry; orthologous to human ENTPD6, a meiosis-associated non-obstructive azoospermia (NOA) related gene identified in GWAS studies	13.1419	-0.0874587	0.00271042	0.0325647	11.214	-0.18	0.48	0.8	RL
YKL078W	DHR2	11	288845	291052	W	RNA helicase	Predominantly nucleolar DEAH-box ATP-dependent RNA helicase; required for 18S rRNA synthesis	11.7179	-0.103749	0.00280338	0.0334719	12.803	-0.17	0.073	0.356736	RL
YMR170C	ALD2	13	601562	603082	C	aldehyde dehydrogenase (NAD(+)) ALD2	Cytoplasmic aldehyde dehydrogenase; involved in ethanol oxidation and beta-alanine biosynthesis; uses NAD+ as the preferred coenzyme; expression is stress induced and glucose repressed; very similar to Ald3p	10.413	-0.135133	0.000190825	0.00446422	13.275	-0.17	0.055	0.30438	RL
YJL198W	PHO90	10	60844	63489	W	SPX domain-containing inorganic phosphate transporter	Low-affinity phosphate transporter; acts upstream of Pho81p in regulation of the PHO pathway; deletion of pho84, pho87, pho89, pho90, and pho91 causes synthetic lethality; transcription independent of Pi and Pho4p activity; overexpression results in vigorous growth; PHO90 has a paralog, PHO87, that arose from the whole genome duplication	12.9401	-0.0992967	0.00121812	0.0178834	14.627	-0.15	0.2	0.571744	RL
YBR078W	ECM33	2	393123	394742	W		GPI-anchored protein of unknown function; possible role in apical bud growth; GPI-anchoring on the plasma membrane crucial to function; phosphorylated in mitochondria; similar to Sps2p; ECM33 has a paralog, PST1, that arose from the whole genome duplication	15.8933	-0.0772011	0.00122667	0.017963	14.097	-0.13	0.11	0.438983	RL
YKR042W	UTH1	11	519527	520624	W	SUN family protein UTH1	Mitochondrial inner membrane protein; role in mitophagy is disputed; implicated in cell wall biogenesis, the oxidative stress response, life span during starvation, and cell death; SUN family member; UTH1 has a paralog, NCA3, that arose from the whole genome duplication	15.1476	-0.145302	2.24106e-05	0.000854126	12.127	-0.1	0.23	0.607238	RL
YLR420W	URA4	12	963785	964879	W	dihydroorotase	Dihydroorotase; catalyzes the third enzymatic step in the de novo biosynthesis of pyrimidines, converting carbamoyl-L-aspartate into dihydroorotate	13.7697	-0.174796	1.54014e-07	1.03064e-05	13.406	-0.1	0.064	0.330858	RL
YPL086C	ELP3	16	384773	386446	C	Elongator subunit ELP3|KAT9|KTI8|TOT3|HPA1	Subunit of Elongator complex; Elongator is required for modification of wobble nucleosides in tRNA; exhibits histone acetyltransferase activity that is directed to histones H3 and H4; disruption confers resistance to K. lactis zymotoxin; human homolog ELP3 can partially complement yeast elp3 null mutant	12.7774	-0.0970423	0.00148694	0.02072	13.652	-0.1	0.43	0.76754	RL
YEL038W	UTR4	5	80462	81145	W	putative acireductone synthase UTR4	Protein with sequence similarity to acireductone synthases; involved in methionine salvage; found in both the cytoplasm and nucleus	11.247	-0.16888	4.62768e-05	0.0014962	13.842	-0.09	0.2	0.571744	RL
YKL024C	URA6	11	392526	393140	C	bifunctional uridylate/adenylate kinase|SOC8	Uridylate kinase; catalyzes the seventh enzymatic step in the de novo biosynthesis of pyrimidines, converting uridine monophosphate (UMP) into uridine-5'-diphosphate (UDP)	12.0096	-0.111893	0.000194048	0.00452124	14.268	-0.09	0.61	0.872873	RL
YML027W	YOX1	13	221406	222563	W		Homeobox transcriptional repressor; binds to Mcm1p and to early cell cycle boxes (ECBs) in the promoters of cell cycle-regulated genes expressed in M/G1 phase; expression is cell cycle-regulated; phosphorylated by Cdc28p; relocalizes from nucleus to cytoplasm upon DNA replication stress; YOX1 has a paralog, YHP1, that arose from the whole genome duplication	10.1896	-0.173383	0.000123287	0.00316748	13.165	-0.09	0.34	0.701673	RL
YAR018C	KIN3	1	170396	171703	C	serine/threonine protein kinase KIN3|NPK1|FUN52	Nonessential serine/threonine protein kinase; possible role in DNA damage response; influences tolerance to high levels of ethanol	10.4143	-0.116262	0.00177011	0.0236309	11.653	-0.08	0.29	0.662346	RL
YBR189W	RPS9B	2	604508	605508	W	ribosomal 40S subunit protein S9B|rp21|YS11|S9B|S4|S13|SUP46|RPS13A	Protein component of the small (40S) ribosomal subunit; homologous to mammalian ribosomal protein S9 and bacterial S4; RPS9B has a paralog, RPS9A, that arose from the whole genome duplication	16.2461	-0.146627	0.00155822	0.0212502	9.641	-0.08	0.94	0.976966	RL
YDR500C	RPL37B	4	1450198	1450853	C	eL37|ribosomal 60S subunit protein L37B|L37e|YL35|L43|L37B	Ribosomal 60S subunit protein L37B; required for processing of 27SB pre-rRNA and formation of stable 66S assembly intermediates; protein abundance increases in response to DNA replication stress; homologous to mammalian ribosomal protein L37, no bacterial homolog; RPL37B has a paralog, RPL37A, that arose from the whole genome duplication	13.8901	-0.208963	6.93512e-05	0.00211173	14.291	-0.08	0.17	0.530482	RL
YHR040W	BCD1	8	187924	189024	W		Essential protein required for the accumulation of box C/D snoRNA	10.9919	-0.114702	0.00333146	0.0375933	11.805	-0.08	0.26	0.635283	RL
YJR104C	SOD1	10	622550	623014	C	superoxide dismutase SOD1|CRS4	Cytosolic copper-zinc superoxide dismutase; detoxifies superoxide; stabilizes Yck1p and Yck2p kinases in glucose to repress respiration; phosphorylated by Dun1p, enters nucleus under oxidative stress to promote transcription of stress response genes; human ortholog SOD1 implicated in ALS complements a null allele; abundance increases under DNA replication stress and during exposure to boric acid;…	14.8595	-0.118854	0.00274256	0.0328821	14.14	-0.08	0.36	0.720556	RL
YNL015W	PBI2	14	605384	605611	W	IB2|I2B|LMA1	Cytosolic inhibitor of vacuolar proteinase B (PRB1); required for efficient vacuole inheritance; with thioredoxin forms protein complex LMA1, which assists in priming SNARE molecules and promotes vacuole fusion; protein abundance increases in response to DNA replication stress	9.62756	-0.207984	1.47804e-06	7.59474e-05	14.743	-0.08	0.94	0.976966	RL
YNR018W	RCF2	14	664270	664944	W	AIM38	Cytochrome c oxidase subunit; has a role in assembly of respiratory supercomplexes; similar to Rcf1p, and either Rcf1p or Rcf2p is required for late-stage assembly of the Cox12p and Cox13p subunits and for cytochrome c oxidase activity; associates with the cytochrome c oxidase - cytochrome bc1 supercomplex; null mutant accumulates reactive oxygen species; member of the conserved hypoxia induced g…	12.242	-0.155816	4.71235e-07	2.7673e-05	13.949	-0.08	0.11	0.438983	RL
YOL143C	RIB4	15	54595	55104	C	lumazine synthase RIB4	Lumazine synthase (DMRL synthase); catalyzes synthesis of immediate precursor to riboflavin; DMRL synthase stands for 6,7-dimethyl-8-ribityllumazine synthase	13.7046	-0.251212	1.39013e-09	1.60004e-07	16.254	-0.08	0.78	0.930968	RL
YGR279C	SCW4	7	1048798	1049958	C	putative family 17 glucosidase	Cell wall protein with similarity to glucanases; scw4 scw10 double mutants exhibit defects in mating; SCW4 has a paralog, SCW10, that arose from the whole genome duplication	13.9832	-0.138602	0.000558609	0.0101094	12.826	-0.07	0.22	0.594161	RL
YLR109W	AHP1	12	368781	369311	W	thioredoxin peroxidase AHP1|cTPxIII	Thiol-specific peroxiredoxin; reduces hydroperoxides to protect against oxidative damage; function in vivo requires covalent conjugation to Urm1p	15.5312	-0.154535	1.01976e-07	7.07074e-06	14.127	-0.07	0.58	0.85791	RL
YLR185W	RPL37A	12	522663	523288	W	eL37|ribosomal 60S subunit protein L37A|L37e|YL35|L43|L37A	Ribosomal 60S subunit protein L37A; required for processing of 27SB pre-rRNA and formation of stable 66S assembly intermediates; homologous to mammalian ribosomal protein L37, no bacterial homolog; RPL37A has a paralog, RPL37B, that arose from the whole genome duplication	13.0026	-0.252501	9.55256e-08	6.78703e-06	14.22	-0.07	0.22	0.594161	RL
YOR367W	SCP1	15	1026007	1026609	W		Component of yeast cortical actin cytoskeleton; binds and cross links actin filaments; originally identified by its homology to calponin (contains a calponin-like repeat) but the Scp1p domain structure is more similar to transgelin	10.4018	-0.119489	0.00192761	0.0253274	14.386	-0.07	0.18	0.549764	RL
YAL049C	AIM2	1	51855	52595	C	protein AIM2	Cytoplasmic protein involved in mitochondrial function or organization; null mutant displays reduced frequency of mitochondrial genome loss; potential Hsp82p interactor	11.0691	-0.127522	0.00161541	0.0218232	14.491	-0.06	0.89	0.962463	RL
YDR032C	PST2	4	504099	504695	C	flavodoxin-like fold family protein	Protein with similarity to a family of flavodoxin-like proteins; induced by oxidative stress in a Yap1p dependent manner; the authentic, non-tagged protein is detected in highly purified mitochondria in high-throughput studies; protein abundance increases in response to DNA replication stress; PST2 has a paralog, RFS1, that arose from the whole genome duplication	12.609	-0.137927	0.000643552	0.0112916	15.435	-0.06	0.44	0.773659	RL
YDR077W	SED1	4	600793	601809	W		Major stress-induced structural GPI-cell wall glycoprotein; associates with translating ribosomes, possible role in mitochondrial genome maintenance; ORF contains two distinct variable minisatellites; SED1 has a paralog, SPI1, that arose from the whole genome duplication	15.5704	-0.218555	2.60469e-05	0.000942768	13.747	-0.06	0.6	0.868156	RL
YIL124W	AYR1	9	126204	127097	W	GBG1|acylglycerone-phosphate reductase	Bifunctional triacylglycerol lipase and 1-acyl DHAP reductase; NADPH-dependent 1-acyl dihydroxyacetone phosphate reductase involved in phosphatidic acid biosynthesis; lipid droplet triacylglycerol lipase involved in the mobilization of non-polar lipids; found in lipid particles, the endoplasmic reticulum and the mitochondrial outer membrane; required for spore germination; role in cell wall biosy…	11.8027	-0.163048	4.61817e-05	0.0014962	14.674	-0.06	0.07	0.347985	RL
YPR159W	KRE6	16	857583	859745	W	beta-glucan synthesis-associated protein KRE6|CWH48	Type II integral membrane protein; required for beta-1,6 glucan biosynthesis; putative beta-glucan synthase; localizes to ER, plasma membrane, sites of polarized growth and secretory vesicles; functionally redundant with Skn1p; KRE6 has a paralog, SKN1, that arose from the whole genome duplication	13.452	-0.180341	4.57566e-15	1.46294e-12	13.022	-0.06	0.3	0.669251	RL
YDR050C	TPI1	4	555726	556472	C	triose-phosphate isomerase TPI1	Triose phosphate isomerase, abundant glycolytic enzyme; mRNA half-life is regulated by iron availability; transcription is controlled by activators Reb1p, Gcr1p, and Rap1p through binding sites in the 5' non-coding region; inhibition of Tpi1p activity by PEP (phosphoenolpyruvate) stimulates redox metabolism in respiring cells; E104D mutation in human homolog TPI1 causes a rare autosomal disease; …	17.2134	-0.166568	0.000312283	0.006373	12.686	-0.05	0.23	0.607238	RL
YDR321W	ASP1	4	1108702	1109847	W	asparaginase ASP1	Cytosolic L-asparaginase, involved in asparagine catabolism; catalyzes hydrolysis of L-asparagine to aspartic acid and ammonia; important enzyme for the treatment of acute lymphoblastic leukemia; has low glutaminase activity and dependence; synthesized constitutively	13.2967	-0.117096	0.00016766	0.00404876	12.453	-0.05	0.14	0.488679	RL
YEL026W	SNU13	5	101943	102323	W	RNA binding protein SNU13	RNA binding protein; part of U3 snoRNP involved in rRNA processing, part of U4/U6-U5 tri-snRNP involved in mRNA splicing, similar to human 15.5K protein	13.0416	-0.144736	0.000168141	0.00404876	15.401	-0.05	0.19	0.560478	RL
YEL034W	HYP2	5	85676	86149	W	translation elongation factor eIF-5A|eIF-5A|eIF5A|TIF51A	Translation elongation factor eIF-5A; required for translation of proteins containing polyproline stretches, including Bni1p, and this leads to a requirement for mating projection formation; structural homolog of bacterial EF-P; undergoes an essential hypusination modification; HYP2 has a paralog, ANB1, that arose from the whole genome duplication; human EIF5A complements the inviability of the y…	15.0252	-0.158794	0.000509269	0.00930426	12.448	-0.05	0.9	0.965217	RL
YJR070C	LIA1	10	569621	570598	C	MMD1	Deoxyhypusine hydroxylase; HEAT-repeat containing metalloenzyme that catalyzes hypusine formation; binds to and is required for the modification of Hyp2p (eIF5A); complements S. pombe mmd1 mutants defective in mitochondrial positioning; protein abundance increases in response to DNA replication stress	13.7051	-0.115481	0.000147645	0.00364676	13.18	-0.05	0.32	0.685525	RL
YPL154C	PEP4	16	259714	260931	C	proteinase A|yscA|PRA1|PHO9	Vacuolar aspartyl protease (proteinase A); required for posttranslational precursor maturation of vacuolar proteinases; important for protein turnover after oxidative damage; plays a protective role in acetic acid induced apoptosis; synthesized as a zymogen, self-activates	14.1308	-0.110745	0.000712155	0.0120898	13.419	-0.05	0.87	0.957629	RL
YBL092W	RPL32	2	45978	46370	W	eL32|ribosomal 60S subunit protein L32|L32e|L32	Ribosomal 60S subunit protein L32; overexpression disrupts telomeric silencing; homologous to mammalian ribosomal protein L32, no bacterial homolog	15.9929	-0.12576	0.00460791	0.0472701	14.853	-0.04	0.65	0.879112	RL
YCR031C	RPS14A	3	177500	178220	C	uS11|ribosomal 40S subunit protein S14A|S11|rp59A|S14A|RPL59|CRY1	Protein component of the small (40S) ribosomal subunit; required for ribosome assembly and 20S pre-rRNA processing; mutations confer cryptopleurine resistance; homologous to mammalian ribosomal protein S14 and bacterial S11; RPS14A has a paralog, RPS14B, that arose from the whole genome duplication	15.5386	-0.127157	5.59999e-05	0.00177077	13.59	-0.04	0.33	0.695443	RL
YGL103W	RPL28	7	310967	311927	W	uL15|ribosomal 60S subunit protein L28|L15|rp44|YL24|L29|L28|CYH2	Ribosomal 60S subunit protein L28; homologous to mammalian ribosomal protein L27A and bacterial L15; may have peptidyl transferase activity; can mutate to cycloheximide resistance	16.0497	-0.128712	0.0043353	0.0456118	12.904	-0.04	0.32	0.685525	RL
YPR052C	NHP6A	16	665693	665974	C	high-mobility group nucleosome-binding protein	High-mobility group (HMG) protein; binds to and remodels nucleosomes; involved in recruiting FACT and other chromatin remodelling complexes to chromosomes; functionally redundant with Nhp6Bp; required for transcriptional initiation fidelity of some tRNA genes; homologous to mammalian HMGB1 and HMGB2; NHP6A has a paralog, NHP6B, that arose from the whole genome duplication; protein abundance incre…	11.5337	-0.124098	0.00298909	0.0348929	13.983	-0.04	0.29	0.662346	RL
YBL030C	PET9	2	163041	163997	C	ADP/ATP carrier protein PET9|OP1|ANC2|AAC2	Major ADP/ATP carrier of the mitochondrial inner membrane; exchanges cytosolic ADP for mitochondrially synthesized ATP; also imports heme and ATP; required for viability in many lab strains that carry a sal1 mutation; PET9 has a paralog, AAC3, that arose from the whole genome duplication; human homolog SLC25A4 implicated in progressive external ophthalmoplegia can complement yeast null mutant	13.6521	-0.133212	0.00111839	0.0167178	14.545	-0.03	0.3	0.669251	RL
YBL055C	YBL055C	2	115573	116829	C	3'-5'-exodeoxyribonuclease|Tat-D	3'-->5' exonuclease and endonuclease with a possible role in apoptosis; has similarity to mammalian and C. elegans apoptotic nucleases	11.5735	-0.105854	0.00387669	0.0419419	13.564	-0.03	0.13	0.470909	RL
YCR012W	PGK1	3	137746	138996	W	phosphoglycerate kinase	3-phosphoglycerate kinase; catalyzes transfer of high-energy phosphoryl groups from the acyl phosphate of 1,3-bisphosphoglycerate to ADP to produce ATP; key enzyme in glycolysis and gluconeogenesis	18.0101	-0.110346	0.00406157	0.0433661	12.984	-0.03	0.63	0.879112	RL
YCR047C	BUD23	3	210718	211545	C	18S rRNA (guanine1575-N7)-methyltransferase	Methyltransferase that methylates residue G1575 of 18S rRNA; required for rRNA processing and nuclear export of 40S ribosomal subunits independently of methylation activity; diploid mutant displays random budding pattern; functional homolog of human WBSCR22	11.6291	-0.104984	0.000695702	0.0118852	13.262	-0.03	0.4	0.743185	RL
YDR382W	RPP2B	4	1239492	1239824	W	ribosomal protein P2B|YP2beta|P2B|L45|YPA1|RPL45	Ribosomal protein P2 beta; a component of the ribosomal stalk, which is involved in the interaction between translational elongation factors and the ribosome; free (non-ribosomal) P2 stimulates the phosphorylation of the eIF2 alpha subunit (Sui2p) by Gcn2p; regulates the accumulation of P1 (Rpp1Ap and Rpp1Bp) in the cytoplasm	14.9368	-0.136185	0.00149074	0.0207227	12.648	-0.03	0.69	0.897139	RL
YHR203C	RPS4B	8	504476	505530	C	eS4|ribosomal 40S subunit protein S4B|S4e|rp5|YS6|S7B|S4B	Protein component of the small (40S) ribosomal subunit; homologous to mammalian ribosomal protein S4, no bacterial homolog; RPS4B has a paralog, RPS4A, that arose from the whole genome duplication	15.9826	-0.110735	0.000473765	0.00888117	14.274	-0.03	0.2	0.571744	RL
YKL152C	GPM1	11	163642	164385	C	phosphoglycerate mutase GPM1	Tetrameric phosphoglycerate mutase; mediates the conversion of 3-phosphoglycerate to 2-phosphoglycerate during glycolysis and the reverse reaction during gluconeogenesis	17.5834	-0.13587	0.000102671	0.00273196	13.726	-0.03	0.99	0.992683	RL
YML024W	RPS17A	13	225889	226697	W	eS17|ribosomal 40S subunit protein S17A|S17e|rp51A|S17A|RPL51A|RP51A	Ribosomal protein 51 (rp51) of the small (40s) subunit; homologous to mammalian ribosomal protein S17, no bacterial homolog; RPS17A has a paralog, RPS17B, that arose from the whole genome duplication	14.9205	-0.162209	0.000688752	0.0118321	13.046	-0.03	0.49	0.808344	RL
YPL090C	RPS6A	16	377291	378395	C	eS6|ribosomal 40S subunit protein S6A|S6e|rp9|YS4|S6A|S10A	Protein component of the small (40S) ribosomal subunit; homologous to mammalian ribosomal protein S6, no bacterial homolog; phosphorylated on S233 by Ypk3p in a TORC1-dependent manner, and on S232 in a TORC1/2-dependent manner by Ypk1/2/3p; RPS6A has a paralog, RPS6B, that arose from the whole genome duplication	16.3478	-0.136582	0.00324085	0.0368599	13.709	-0.03	0.075	0.361732	RL
YAL003W	EFB1	1	142174	143160	W	translation elongation factor 1 subunit beta|EF-1beta|eEF1Balpha|TEF5	Translation elongation factor 1 beta; stimulates nucleotide exchange to regenerate EF-1 alpha-GTP for the next elongation cycle; part of the EF-1 complex, which facilitates binding of aminoacyl-tRNA to the ribosomal A site; human homolog EEF1B2 can complement yeast efb1 mutants	16.0564	-0.137676	0.000236856	0.00516328	13.713	-0.02	0.76	0.921536	RL
YBR088C	POL30	2	424990	425766	C	proliferating cell nuclear antigen|PCNA	Proliferating cell nuclear antigen (PCNA); functions as the sliding replication clamp for DNA polymerase delta; may function as a docking site for other proteins required for mitotic and meiotic chromosomal DNA replication and for DNA repair; PCNA ubiquitination at K164 plays a crucial role during Okazaki fragment processing	12.6958	-0.104995	0.00241788	0.0301188	15.258	-0.02	0.92	0.973366	RL
YGL047W	ALG13	7	411552	412160	W	N-acetylglucosaminyldiphosphodolichol N-acetylglucosaminyltransferase catalytic subunit ALG13	Catalytic component of UDP-GlcNAc transferase; required for the second step of dolichyl-linked oligosaccharide synthesis; anchored to the ER membrane via interaction with Alg14p; similar to bacterial and human glycosyltransferases; protein abundance increases in response to DNA replication stress; both human homologs ALG13 and ALG14 are required to complement yeast alg13 mutant	9.28433	-0.155478	0.00159034	0.021637	12.258	-0.02	0.71	0.900539	RL
YGR173W	RBG2	7	843854	844960	W	GIR1	Protein with a role in translation; forms a complex with Gir2p; has similarity to mammalian developmentally regulated GTP-binding protein	12.2197	-0.0954318	0.000959598	0.0150476	14.162	-0.02	0.41	0.7494	RL
YNL067W	RPL9B	14	499681	500256	W	uS4|uL6|ribosomal 60S subunit protein L9B|L6|rp24|YL11|L9B|L8B	Ribosomal 60S subunit protein L9B; homologous to mammalian ribosomal protein L9 and bacterial L6; RPL9B has a paralog, RPL9A, that arose from a single-locus duplication	13.9169	-0.169365	0.000271791	0.00574864	13.253	-0.02	0.92	0.973366	RL
YNL135C	FPR1	14	371882	372226	C	peptidylprolyl isomerase FPR1|RBP1|FKB1	Peptidyl-prolyl cis-trans isomerase (PPIase); binds to the drugs FK506 and rapamycin; also binds to the nonhistone chromatin binding protein Hmo1p and may regulate its assembly or function; N-terminally propionylated in vivo; mutation is functionally complemented by human FKBP1A	13.0702	-0.0868577	0.00391521	0.0420878	14.15	-0.02	0.57	0.85682	RL
YNL178W	RPS3	14	302680	303402	W	uS3|ribosomal 40S subunit protein S3|rp13|YS3|S3|SUF14	Protein component of the small (40S) ribosomal subunit; has apurinic/apyrimidinic (AP) endonuclease activity; essential for viability; nascent Rps3p is bound by specific chaperone Yar1p during translation; homologous to mammalian ribosomal protein S3 and bacterial S3	16.6381	-0.141978	0.00191037	0.0251583	13.905	-0.02	0.36	0.720556	RL
YGL035C	MIG1	7	431548	433062	C	transcription factor MIG1|TDS22|SSN1|CAT4	Transcription factor involved in glucose repression; sequence specific DNA binding protein containing two Cys2His2 zinc finger motifs; regulated by the SNF1 kinase and the GLC7 phosphatase; regulates filamentous growth along with Mig2p in response to glucose depletion; activated in stochastic pulses of nuclear localization, shuttling between cytosol and nucleus depending on external glucose level…	11.6054	-0.143833	0.000227861	0.00511421	12.838	-0.01	0.98	0.99071	RL
YGL156W	AMS1	7	210416	213667	W	alpha-mannosidase	Vacuolar alpha mannosidase; involved in free oligosaccharide (fOS) degradation; delivered to the vacuole in a novel pathway separate from the secretory pathway	9.59925	-0.182859	0.000470296	0.00884494	13.686	-0.01	0.82	0.945171	RL
YGR027C	RPS25A	7	534132	534458	C	eS25|ribosomal 40S subunit protein S25A|S25e|rp45|YS23|S31A|S25A|RPS31A	Protein component of the small (40S) ribosomal subunit; homologous to mammalian ribosomal protein S25, no bacterial homolog; RPS25A has a paralog, RPS25B, that arose from the whole genome duplication	15.0191	-0.151346	6.18755e-05	0.00193529	15.48	-0.01	0.88	0.960472	RL
YMR278W	PRM15	13	822763	824631	W	PGM3|phosphoribomutase PRM15	Phosphoribomutase; catalyzes interconversion of ribose-1-phosphate and ribose-5-phosphate; has some phosphoglucomutase activity but primary activity in vivo is phosphoribomutase; contributes to ribose recycling in the pentose phosphate pathway; transcription induced in response to stress; green fluorescent protein (GFP)-fusion protein localizes to the cytoplasm and nucleus; non-essential	11.2201	-0.142619	7.13079e-05	0.00214857	13.601	-0.01	0.65	0.879112	RL
YOL039W	RPP2A	15	254297	254617	W	P2A|ribosomal protein P2A|RPLA2|RPL44	Ribosomal protein P2 alpha; a component of the ribosomal stalk, which is involved in the interaction between translational elongation factors and the ribosome; free (non-ribosomal) P2 stimulates the phosphorylation of the eIF2 alpha subunit (Sui2p) by Gcn2p; regulates the accumulation of P1 (Rpp1Ap and Rpp1Bp) in the cytoplasm	14.8141	-0.129409	0.000684731	0.0117983	12.365	-0.01	0.72	0.906122	RL
YOL121C	RPS19A	15	92026	92850	C	eS19|ribosomal 40S subunit protein S19A|S19e|rp55a|YS16A|S19A|S16aA	Protein component of the small (40S) ribosomal subunit; required for assembly and maturation of pre-40 S particles; homologous to mammalian ribosomal protein S19, no bacterial homolog; mutations in human RPS19 are associated with Diamond Blackfan anemia; RPS19A has a paralog, RPS19B, that arose from the whole genome duplication	14.5486	-0.157638	0.000265759	0.00566461	13.726	-0.01	0.71	0.900539	RL
YOR251C	TUM1	15	802550	803464	C	thiosulfate sulfurtransferase	Rhodanese domain sulfur transferase; accepts persulfite from Nfs1p and transfers it to Uba4p in the pathway for 2-thiolation of the wobble uridine base of tRNAs; also stimulates sulfur transfer by Nfs1p; may be mitochondrially localized	11.6653	-0.106752	0.00164819	0.022162	14.933	-0.01	0.82	0.945171	RL
YPR041W	TIF5	16	648704	649921	W	translation initiation factor eIF5|SUI5	Translation initiation factor eIF5; functions both as a GTPase-activating protein to mediate hydrolysis of ribosome-bound GTP and as a GDP dissociation inhibitor to prevent recycling of eIF2	14.0379	-0.0736382	0.00253566	0.0309825	14.081	-0.01	0.7	0.900539	RL
YBL072C	RPS8A	2	88523	89125	C	eS8|ribosomal 40S subunit protein S8A|S8e|rp19|YS9|S8A|S14A	Protein component of the small (40S) ribosomal subunit; homologous to mammalian ribosomal protein S8, no bacterial homolog; RPS8A has a paralog, RPS8B, that arose from the whole genome duplication	16.1883	-0.122283	0.00110373	0.016624	14.09	0	0.81	0.94203	RL
YGL030W	RPL30	7	439091	439638	W	eL30|ribosomal 60S subunit protein L30|L30e|rp73|YL38|L32|L30	Ribosomal 60S subunit protein L30; involved in pre-rRNA processing in the nucleolus; autoregulates splicing of its transcript; homologous to mammalian ribosomal protein L30, no bacterial homolog	14.9742	-0.190995	0.000103012	0.00273196	13.239	0	0.71	0.900539	RL
YGR244C	LSC2	7	978036	979319	C	succinate--CoA ligase (GDP-forming) subunit beta	Beta subunit of succinyl-CoA ligase; succinyl-CoA ligase is a mitochondrial enzyme of the TCA cycle that catalyzes the nucleotide-dependent conversion of succinyl-CoA to succinate	12.4122	-0.101677	0.00131495	0.0190618	13.87	0	0.97	0.986376	RL
YHR113W	APE4	8	336337	337809	W	aspartyl aminopeptidase	Cytoplasmic aspartyl aminopeptidase with possible vacuole function; Cvt pathway cargo protein; cleaves unblocked N-terminal acidic amino acids from peptide substrates; forms a 12-subunit homo-oligomer; M18 metalloprotease family	11.7935	-0.134208	0.000499874	0.00919098	13.393	0	0.76	0.921536	RL
YLR248W	RCK2	12	634252	636084	W	serine/threonine protein kinase RCK2|CMK3|CLK1	Protein kinase involved in response to oxidative and osmotic stress; identified as suppressor of S. pombe cell cycle checkpoint mutations; similar to CaM (calmodulin) kinases; RCK2 has a paralog, RCK1, that arose from the whole genome duplication	12.8425	-0.126415	7.14818e-06	0.000314107	13.44	0	0.65	0.879112	RL
YOR020W-A	YOR020W-A	15	371685	371957	W		Putative protein of unknown function; conserved in A. gossypii; the authentic, non-tagged protein is detected in highly purified mitochondria in high-throughput studies	8.42223	-0.166503	0.00391486	0.0420878	13.571	0	0.85	0.951383	RL
YOR332W	VMA4	15	943656	944357	W	H(+)-transporting V1 sector ATPase subunit E	Subunit E of the V1 domain of the vacuolar H+-ATPase (V-ATPase); V-ATPase is an electrogenic proton pump found throughout the endomembrane system; V1 domain has eight subunits; required for the V1 domain to assemble onto the vacuolar membrane; protein abundance increases in response to DNA replication stress	14.0235	-0.115211	0.00043023	0.00817153	13.647	0	0.47	0.794582	RL
YBL039C	URA7	2	143989	145728	C	CTP synthase URA7	Major CTP synthase isozyme (see also URA8); catalyzes the ATP-dependent transfer of the amide nitrogen from glutamine to UTP, forming CTP, the final step in de novo biosynthesis of pyrimidines; involved in phospholipid biosynthesis; capable of forming cytoplasmic filaments termed cytoophidium, especially during conditions of glucose depletion; URA7 has a paralog, URA8, that arose from the whole g…	14.2901	-0.160057	6.12831e-07	3.42412e-05	14.494	0.01	0.58	0.85791	RL
YBR010W	HHT1	2	256331	256741	W	histone H3|SIN2|BUR5	Histone H3; core histone protein required for chromatin assembly, part of heterochromatin-mediated telomeric and HM silencing; one of two identical histone H3 proteins (see HHT2); regulated by acetylation, methylation, and phosphorylation; H3K14 acetylation plays an important role in the unfolding of strongly positioned nucleosomes during repair of UV damage	13.5841	-0.14504	0.00108968	0.0164596	15.205	0.01	0.71	0.900539	RL
YIL041W	GVP36	9	276525	277505	W		BAR domain protein that localizes to early and late Golgi vesicles; required for adaptation to varying nutrient concentrations, fluid-phase endocytosis, polarization of the actin cytoskeleton, and vacuole biogenesis	12.8853	-0.105783	0.00292487	0.0344226	13.133	0.01	0.56	0.855189	RL
YKL056C	TMA19	11	334412	334915	C	MMI1|RBF18	Protein that associates with ribosomes; homolog of translationally controlled tumor protein; green fluorescent protein (GFP)-fusion protein localizes to the cytoplasm and relocates to the mitochondrial outer surface upon oxidative stress	15.5523	-0.164448	0.000807629	0.013356	13.942	0.01	0.3	0.669251	RL
YKL181W	PRS1	11	107316	108599	W	ribose phosphate diphosphokinase subunit PRS1|PRP1	5-phospho-ribosyl-1(alpha)-pyrophosphate synthetase; synthesizes PRPP, which is required for nucleotide, histidine, and tryptophan biosynthesis; plays a key role in cell wall integrity (CWI) pathway; one of five related enzymes, which are active as heteromultimeric complexes; missense mutations in human homolog PRPS1 are associated with neuropathic Arts syndrome and Charcot-Marie Tooth (CMTX5) di…	14.1844	-0.102675	0.00213204	0.0273274	14.016	0.01	0.97	0.986376	RL
YML012W	ERV25	13	246116	246751	W		Member of the p24 family involved in ER to Golgi transport; role in misfolded protein quality control; forms a heterotrimeric complex with Erp1, Erp2p, and Emp24,	13.4274	-0.124903	0.000275677	0.00576916	13.741	0.01	0.47	0.794582	RL
YMR318C	ADH6	13	911061	912143	C	NADP-dependent alcohol dehydrogenase|ADHVI	NADPH-dependent medium chain alcohol dehydrogenase; has broad substrate specificity; member of the cinnamyl family of alcohol dehydrogenases; may be involved in fusel alcohol synthesis or in aldehyde tolerance; protein abundance increases in response to DNA replication stress	13.7279	-0.126666	0.000316164	0.00639285	14.056	0.01	0.62	0.874619	RL
YAL038W	CDC19	1	71786	73288	W	pyruvate kinase CDC19|PYK1	Pyruvate kinase; functions as a homotetramer in glycolysis to convert phosphoenolpyruvate to pyruvate, the input for aerobic (TCA cycle) or anaerobic (glucose fermentation) respiration; regulated via allosteric activation by fructose bisphosphate; CDC19 has a paralog, PYK2, that arose from the whole genome duplication	18.2018	-0.126859	2.29247e-05	0.00086797	13.414	0.02	0.16	0.51995	RL
YGR192C	TDH3	7	882812	883810	C	glyceraldehyde-3-phosphate dehydrogenase (phosphorylating) TDH3|GAPDH|GPD|SSS2|HSP36|HSP35|GLD1	Glyceraldehyde-3-phosphate dehydrogenase (GAPDH), isozyme 3; involved in glycolysis and gluconeogenesis; tetramer that catalyzes the reaction of glyceraldehyde-3-phosphate to 1,3 bis-phosphoglycerate; detected in the cytoplasm and cell wall; GAPDH-derived antimicrobial peptides secreted by S. cerevisiae are active against a wide variety of wine-related yeasts and bacteria; binds AU-rich RNA	19.2576	-0.100422	0.00493502	0.0496903	15.333	0.02	0.92	0.973366	RL
YHL001W	RPL14B	8	104277	105091	W	eL14|ribosomal 60S subunit protein L14B|L14e|L14B	Ribosomal 60S subunit protein L14B; homologous to mammalian ribosomal protein L14, no bacterial homolog; RPL14B has a paralog, RPL14A, that arose from the whole genome duplication; protein abundance increases in response to DNA replication stress	13.9455	-0.148615	0.000775559	0.0129372	15.376	0.02	0.84	0.95129	RL
YLR340W	RPP0	12	805887	806825	W	uL10|ribosomal protein P0|P0|L10E|A0|RPL10E	Conserved ribosomal protein P0 of the ribosomal stalk; involved in interaction between translational elongation factors and the ribosome; phosphorylated on serine 302; homologous to mammalian ribosomal protein LP0 and bacterial L10	16.6464	-0.125409	0.000210945	0.00481742	13.938	0.02	0.28	0.649821	RL
YMR116C	ASC1	13	499456	500688	C	RACK1|guanine nucleotide-binding protein subunit beta|ASU9|NAD1|CPC2	G-protein beta subunit and guanine dissociation inhibitor for Gpa2p; ortholog of RACK1 that inhibits translation; core component of the small (40S) ribosomal subunit; required to prevent frameshifting at ribosomes stalled at repeated CGA codons; regulates P-body formation induced by replication stress; represses Gcn4p in the absence of amino acid starvation	17.0902	-0.135846	0.00118823	0.0174892	13.183	0.02	0.48	0.8	RL
YPL220W	RPL1A	16	135790	136443	W	uL1|PUB2|ribosomal 60S subunit protein L1A|L1|L1A|SSM1	Ribosomal 60S subunit protein L1A; N-terminally acetylated; homologous to mammalian ribosomal protein L10A and bacterial L1; RPL1A has a paralog, RPL1B, that arose from the whole genome duplication; rpl1a rpl1b double null mutation is lethal	15.3573	-0.132843	0.00326938	0.0369652	14.512	0.02	0.71	0.900539	RL
YPR132W	RPS23B	16	794965	795767	W	uS12|ribosomal 40S subunit protein S23B|rp37|YS14|S28B|S23B|S12	Ribosomal protein 28 (rp28) of the small (40S) ribosomal subunit; required for translational accuracy; homologous to mammalian ribosomal protein S23 and bacterial S12; RPS23B has a paralog, RPS23A, that arose from the whole genome duplication; deletion of both RPS23A and RPS23B is lethal	15.4444	-0.171707	0.000352661	0.00702271	14.699	0.02	0.16	0.51995	RL
YAL036C	RBG1	1	75043	76152	C	GTP-binding protein RBG1|FUN11	Member of the DRG family of GTP-binding proteins; associates with translating ribosomes; interacts with Tma46p, Ygr250cp, Gir2p and Yap1p via two-hybrid	13.058	-0.10262	0.000489021	0.00907844	13.934	0.03	0.67	0.888986	RL
YJR077C	MIR1	10	577255	578190	C	PTP	Mitochondrial phosphate carrier; imports inorganic phosphate into mitochondria; functionally redundant with Pic2p but more abundant than Pic2p under normal conditions; phosphorylated	13.0984	-0.122843	0.00144802	0.020375	13.823	0.03	0.53	0.837523	RL
YLR405W	DUS4	12	929789	930892	W	tRNA dihydrouridine synthase	Dihydrouridine synthase; member of a widespread family of conserved proteins including Smm1p, Dus1p, and Dus3p	10.8504	-0.127405	0.00027278	0.00574864	13.055	0.03	0.89	0.962463	RL
YDR188W	CCT6	4	836421	838061	W	chaperonin-containing T-complex subunit CCT6|TCP20|TCP6|HTR3	Subunit of the cytosolic chaperonin Cct ring complex; related to Tcp1p, essential protein that is required for the assembly of actin and tubulins in vivo; contains an ATP-binding motif	14.1564	-0.104513	9.35751e-05	0.0025644	13.115	0.04	0.53	0.837523	RL
YJL167W	ERG20	10	105014	106072	W	bifunctional (2E,6E)-farnesyl diphosphate synthase/dimethylallyltranstransferase|FPP1|FDS1|BOT3	Farnesyl pyrophosphate synthetase; has both dimethylallyltranstransferase and geranyltranstransferase activities; catalyzes the formation of C15 farnesyl pyrophosphate units for isoprenoid and sterol biosynthesis	14.3134	-0.113804	7.98787e-05	0.00228707	13.782	0.04	0.39	0.735688	RL
YOL120C	RPL18A	15	93395	94402	C	eL18|ribosomal 60S subunit protein L18A|L18e|rp28A|L18A|RP28A	Ribosomal 60S subunit protein L18A; intron of RPL18A pre-mRNA forms stem-loop structures that are a target for Rnt1p cleavage leading to degradation; homologous to mammalian ribosomal protein L18, no bacterial homolog; RPL18A has a paralog, RPL18B, that arose from the whole genome duplication	15.9101	-0.131755	0.000881189	0.014009	14.601	0.04	0.68	0.894919	RL
YHL011C	PRS3	8	80654	81616	C	ribose phosphate diphosphokinase subunit PRS3	5-phospho-ribosyl-1(alpha)-pyrophosphate synthetase; synthesizes PRPP, which is required for nucleotide, histidine, and tryptophan biosynthesis; one of five related enzymes, which are active as heteromultimeric complexes	13.2405	-0.113057	7.59785e-05	0.00222525	12.62	0.05	0.67	0.888986	RL
YHR070W	TRM5	8	234881	236380	W	tRNA (guanine) methyltransferase	tRNA(m(1)G37)methyltransferase; methylates a tRNA base adjacent to the anticodon that has a role in prevention of frameshifting; localized to both cytoplasm and mitochondria, and modifies both cytoplasmic and mitochondrial tRNAs; mutations in human ortholog TRMT5 are associated with skeletal muscle respiratory chain deficiencies, and trm5 mutations analogous to disease mutations decrease respirat…	11.5208	-0.169654	9.92538e-07	5.24042e-05	13.173	0.05	0.54	0.841516	RL
YOR374W	ALD4	15	1039840	1041399	W	aldehyde dehydrogenase (NADP(+)) ALD4|ALDH2|ALD7	Mitochondrial aldehyde dehydrogenase; required for growth on ethanol and conversion of acetaldehyde to acetate; phosphorylated; activity is K+ dependent; utilizes NADP+ or NAD+ equally as coenzymes; expression is glucose repressed; can substitute for cytosolic NADP-dependent aldehyde dehydrogenase when directed to the cytosol; human homolog ALDH2 can complement yeast ald4 mutant	11.869	-0.249877	5.98294e-07	3.40909e-05	14.675	0.05	0.43	0.76754	RL
YPR080W	TEF1	16	700594	701970	W	translation elongation factor EF-1 alpha|eEF1A|EF-1 alpha	Translational elongation factor EF-1 alpha; in the GTP-bound active form, binds to and delivers aminoacylated tRNA to the A-site of ribosomes for elongation of nascent polypeptides; associates with vacuolar Rho1p GTPase; may also have a role in tRNA re-export from the nucleus; TEF1 has a paralog, TEF2, that arose from the whole genome duplication	18.7527	-0.121126	0.000420475	0.00803932	13.995	0.05	0.49	0.808344	RL
YML056C	IMD4	13	162194	164176	C	IMP dehydrogenase IMD4	Inosine monophosphate dehydrogenase; catalyzes the rate-limiting step in the de novo synthesis of GTP; member of a four-gene family in S. cerevisiae, constitutively expressed; IMD4 has a paralog, IMD3, that arose from the whole genome duplication	15.0708	-0.146892	0.000100631	0.00269364	13.987	0.06	0.12	0.456388	RL
YPL061W	ALD6	16	432588	434090	W	aldehyde dehydrogenase (NADP(+)) ALD6|ALD1	Cytosolic aldehyde dehydrogenase; activated by Mg2+ and utilizes NADP+ as the preferred coenzyme; required for conversion of acetaldehyde to acetate; constitutively expressed; locates to the mitochondrial outer surface upon oxidative stress	14.6949	-0.218932	6.76764e-11	9.49945e-09	13.892	0.06	0.17	0.530482	RL
YIL083C	CAB2	9	203556	204653	C	phosphopantothenate--cysteine ligase CAB2	Subunit of the CoA-Synthesizing Protein Complex (CoA-SPC); subunits of this complex are: Cab2p, Cab3p, Cab4p, Cab5p, Sis2p and Vhs3p; probable phosphopantothenoylcysteine synthetase (PPCS), which catalyzes the second step of coenzyme A biosynthesis from pantothenate; null mutant lethality is complemented by human homolog PPCS and by E. coli coaBC (encoding a bifunctional enzyme with PPCS activity)	11.3037	-0.0965025	0.00268049	0.0322724	13.744	0.07	0.39	0.735688	RL
YLR447C	VMA6	12	1026856	1027893	C	H(+)-transporting V0 sector ATPase subunit d	Subunit d of the V0 integral membrane domain of V-ATPase; part of the electrogenic proton pump found in the endomembrane system; required for V1 domain assembly on the vacuolar membrane; the V0 integral membrane domain of vacuolar H+-ATPase (V-ATPase) has five subunits	14.0114	-0.100112	0.00205821	0.0267382	14.456	0.07	0.3	0.669251	RL
YPL249C-A	RPL36B	16	75699	76239	C	eL36|ribosomal 60S subunit protein L36B|L36e|YL39|L39|L36B	Ribosomal 60S subunit protein L36B; binds to 5.8 S rRNA; homologous to mammalian ribosomal protein L36, no bacterial homolog; RPL36B has a paralog, RPL36A, that arose from the whole genome duplication	14.8784	-0.089091	0.00440472	0.0460057	16.118	0.07	0.88	0.960472	RL
YER099C	PRS2	5	358105	359061	C	ribose phosphate diphosphokinase subunit PRS2	5-phospho-ribosyl-1(alpha)-pyrophosphate synthetase, synthesizes PRPP; which is required for nucleotide, histidine, and tryptophan biosynthesis; one of five related enzymes, which are active as heteromultimeric complexes; PRS2 has a paralog, PRS4, that arose from the whole genome duplication	11.5583	-0.107515	0.000698086	0.0118861	12.375	0.08	0.34	0.701673	RL
YFR044C	DUG1	6	239992	241437	C	metallodipeptidase	Cys-Gly metallo-di-peptidase; forms a complex with Dug2p and Dug3p to degrade glutathione (GSH) and other peptides containing a gamma-glu-X bond in an alternative pathway to GSH degradation by gamma-glutamyl transpeptidase (Ecm38p); human homolog CNDP2 can complement yeast dug1 mutant	13.6488	-0.0853789	0.00364209	0.0402308	14.178	0.08	0.0048	0.065736	RL
YIL018W	RPL2B	9	316768	317932	W	uL2|ribosomal 60S subunit protein L2B|L2|rp8|YL6|L5B|L2B|LOT2|RPL5A	Ribosomal 60S subunit protein L2B; homologous to mammalian ribosomal protein L2 and bacterial L2; RPL2B has a paralog, RPL2A, that arose from the whole genome duplication; expression is upregulated at low temperatures	16.6421	-0.133935	0.0030732	0.0354435	15.683	0.08	0.019	0.165134	RL
YOL086C	ADH1	15	159548	160594	C	alcohol dehydrogenase ADH1|ADC1	Alcohol dehydrogenase; fermentative isozyme active as homo- or heterotetramers; required for the reduction of acetaldehyde to ethanol, the last step in the glycolytic pathway; ADH1 has a paralog, ADH5, that arose from the whole genome duplication	18.4275	-0.1375	6.7692e-05	0.00207217	13.517	0.09	0.81	0.94203	RL
YIR012W	SQT1	9	378486	379781	W		Specific chaperone for ribosomal protein Rpl10p; binds nascent Rpl10p during translation; contains multiple WD repeats; interacts with Qsr1p in a two-hybrid assay; protein abundance increases in response to DNA replication stress	13.2992	-0.112207	0.000861025	0.0138801	14.768	0.1	0.15	0.507843	RL
YPL048W	CAM1	16	464401	465648	W	translation elongation factor EF1B gamma|CPBP|TEF3	One of two isoforms of the gamma subunit of eEF1B; stimulates the release of GDP from eEF1A (Tef1p/Tef2p) post association with the ribosomal complex with eEF1Balpha subunit; nuclear protein required for transcription of MXR1; binds the MXR1 promoter in the presence of other nuclear factors; binds calcium and phospholipids	13.4101	-0.0930294	0.00200197	0.0261025	14.937	0.1	0.73	0.910303	RL
YMR217W	GUA1	13	701790	703367	W	GMP synthase (glutamine-hydrolyzing)	GMP synthase; highly conserved enzyme that catalyzes the second step in the biosynthesis of GMP from inosine 5'-phosphate (IMP); transcription is not subject to regulation by guanine but is negatively regulated by nutrient starvation; reduction-of-function mutation gua1-G388D causes changes in cellular guanine nucleotide pools, defects in general protein synthesis, and impaired translation of GCN…	15.226	-0.10597	8.24811e-05	0.00231551	14.161	0.11	0.075	0.361732	RL
YER152C	YER152C	5	472657	473988	C	2-aminoadipate transaminase	Protein with 2-aminoadipate transaminase activity; shares amino acid similarity with the aminotransferases Aro8p and Aro9p; YER152C is not an essential gene	11.892	-0.135138	1.39734e-05	0.000562357	12.08	0.13	0.36	0.720556	RL
YMR241W	YHM2	13	751961	752905	W		Citrate and oxoglutarate carrier protein; exports citrate from and imports oxoglutarate into the mitochondrion, causing net export of NADPH reducing equivalents; also associates with mt nucleoids and has a role in replication and segregation of the mt genome	13.1239	-0.100161	0.00248304	0.0305994	15.339	0.13	0.26	0.635283	RL
YNR035C	ARC35	14	693019	694047	C	END9	Subunit of the ARP2/3 complex; ARP2/3 is required for the motility and integrity of cortical actin patches; required for cortical localization of calmodulin	12.9039	-0.0769512	0.00449067	0.0463839	14.215	0.14	0.21	0.586731	RL
YOR063W	RPL3	15	444686	445849	W	uL3|ribosomal 60S subunit protein L3|rp1|YL1|L3|YOR29-14|TCM1|MAK8	Ribosomal 60S subunit protein L3; homologous to mammalian ribosomal protein L3 and bacterial L3; plays an important role in function of eIF5B in stimulating 3' end processing of 18S rRNA in context of 80S ribosomes that have not yet engaged in translation; involved in replication and maintenance of killer double stranded RNA virus	17.5065	-0.129478	0.000165232	0.00403392	14.031	0.14	0.082	0.380609	RL
YDR012W	RPL4B	4	471853	472941	W	uL4|ribosomal 60S subunit protein L4B|L4|rp2|YL2|L4B|L2B	Ribosomal 60S subunit protein L4B; homologous to mammalian ribosomal protein L4 and bacterial L4; RPL4B has a paralog, RPL4A, that arose from the whole genome duplication	15.6209	-0.116202	3.48235e-06	0.000168411	16.254	0.16	0.51	0.821966	RL
YLR044C	PDC1	12	232390	234081	C	indolepyruvate decarboxylase 1	Major of three pyruvate decarboxylase isozymes; key enzyme in alcoholic fermentation; decarboxylates pyruvate to acetaldehyde; involved in amino acid catabolism; subject to glucose-, ethanol-, and autoregulation; activated by phosphorylation in response to glucose levels; N-terminally propionylated in vivo	18.3528	-0.122367	0.000172032	0.00410807	14.151	0.16	0.043	0.262665	RL
YLR061W	RPL22A	12	263194	263948	W	eL22|ribosomal 60S subunit protein L22A|L22e|rp4|l1c|YL31|L22A	Ribosomal 60S subunit protein L22A; required for translation of long 5' UTR of IME1 mRNA and meiotic entry; required for the oxidative stress response, pseudohyphal and invasive growth; homologous to mammalian ribosomal protein L22, no bacterial homolog; RPL22A has a paralog, RPL22B, that arose from the whole genome duplication	14.8	-0.143174	0.000600306	0.0107291	8.41	0.17	0.49	0.808344	RL
YNL209W	SSB2	14	252059	253900	W	Hsp70 family ATPase SSB2|YG103	Cytoplasmic ATPase that is a ribosome-associated molecular chaperone; functions with J-protein partner Zuo1p; may be involved in the folding of newly-synthesized polypeptide chains; member of the HSP70 family; SSB2 has a paralog, SSB1, that arose from the whole genome duplication	16.7985	-0.112853	3.86939e-05	0.0013099	14.161	0.2	0.6	0.868156	RL
YPL274W	SAM3	16	22938	24701	W	bifunctional polyamine/amino acid permease SAM3	High-affinity S-adenosylmethionine permease; required for utilization of S-adenosylmethionine as a sulfur source; has similarity to S-methylmethionine permease Mmp1p	12.7269	0.115182	0.000366252	0.00712088	13.407	-0.38	0.19	0.560478	RH
YPL058C	PDR12	16	445842	450377	C	ATP-binding cassette multidrug transporter PDR12	Plasma membrane ATP-binding cassette (ABC) transporter; weak-acid-inducible multidrug transporter required for weak organic acid resistance; induced by sorbate and benzoate and regulated by War1p; mutants exhibit sorbate hypersensitivity	11.7485	0.178251	1.17011e-05	0.000484458	13.798	-0.32	0.25	0.628031	RH
YIL121W	QDR2	9	132244	133872	W	cation transporter	Plasma membrane transporter of the major facilitator superfamily; member of the 12-spanner drug:H(+) antiporter DHA1 family; exports copper; has broad substrate specificity and can transport many mono- and divalent cations; transports a variety of drugs and is required for resistance to quinidine, barban, cisplatin, and bleomycin; contributes to potassium homeostasis; expression is regulated by c…	14.3727	0.159134	6.88882e-10	8.09085e-08	12.921	-0.21	0.27	0.64333	RH
YBR115C	LYS2	2	469748	473926	C	L-aminoadipate-semialdehyde dehydrogenase	Alpha aminoadipate reductase; catalyzes the reduction of alpha-aminoadipate to alpha-aminoadipate 6-semialdehyde, which is the fifth step in biosynthesis of lysine; activation requires posttranslational phosphopantetheinylation by Lys5p	13.8144	0.115978	0.00143487	0.020375	13.852	-0.15	0.021	0.174887	RH
YJR137C	MET5	10	678957	683285	C	sulfite reductase (NADPH) subunit beta|ECM17	Sulfite reductase beta subunit; involved in amino acid biosynthesis, transcription repressed by methionine	12.6881	0.149301	0.000315736	0.00639285	14.264	-0.14	0.004	0.0578771	RH
YHR047C	AAP1	8	198740	201310	C	arginine/alanine aminopeptidase|AAP1'	Arginine/alanine amino peptidase; overproduction stimulates glycogen accumulation; AAP1 has a paralog, APE2, that arose from the whole genome duplication	12.082	0.160559	1.73323e-05	0.0006832	13.723	-0.12	0.31	0.678698	RH
YJR109C	CPA2	10	629585	632941	C	carbamoyl-phosphate synthase (glutamine-hydrolyzing) CPA2	Large subunit of carbamoyl phosphate synthetase; carbamoyl phosphate synthetase catalyzes a step in the synthesis of citrulline, an arginine precursor	14.5617	0.209121	4.99903e-06	0.00023308	13.454	-0.12	0.018	0.159658	RH
YKL095W	YJU2	11	262277	263113	W	mRNA splicing protein YJU2|CWC16	Essential protein required for pre-mRNA splicing; associates transiently with the spliceosomal NTC ("nineteen complex") and acts after Prp2p to promote the first catalytic reaction of splicing	9.27958	0.132317	0.00487474	0.0492178	12.639	-0.08	0.37	0.725985	RH
YDR512C	EMI1	4	1470500	1471063	C		Non-essential protein of unknown function; required for transcriptional induction of the early meiotic-specific transcription factor IME1, also required for sporulation; contains twin cysteine-x9-cysteine motifs; deletion affects mitochondrial morphology	10.5252	0.185891	0.000137764	0.00346813	13.933	-0.07	0.33	0.695443	RH
YJR090C	GRR1	10	590872	594327	C	SCF ubiquitin ligase complex subunit GRR1|SDC1|SSU2|COT2|CAT80	F-box protein component of an SCF ubiquitin-ligase complex; modular substrate specificity factor which associates with core SCF (Cdc53p, Skp1p and Hrt1p/Rbx1p) to form the SCF(Grr1) complex; SCF(Grr1) acts as a ubiquitin-protein ligase directing ubiquitination of substrates such as: Gic2p, Mks1p, Mth1p, Cln1p, Cln2p and Cln3p; involved in carbon catabolite repression, glucose-dependent divalent c…	11.9111	0.106131	0.00449735	0.0463839	13.775	-0.06	0.49	0.808344	RH
YDL019C	OSH2	4	417663	421514	C	oxysterol-binding protein related protein OSH2	Member of an oxysterol-binding protein family with seven members; in S. cerevisiae, family members have overlapping, redundant functions in sterol metabolism and collectively perform a function essential for viability; contains FFAT motif; interacts with ER anchor Scs2p at patches at the plasma membrane and at the nuclear envelope; regulated by sterol binding; OSH2 has a paralog, SWH1, that arose…	12.1762	0.129431	0.00107644	0.0163831	13.186	-0.05	0.22	0.594161	RH
YKR083C	DAD2	11	596421	596822	C	HSK1	Essential subunit of the Dam1 complex (aka DASH complex); complex couples kinetochores to the force produced by MT depolymerization thereby aiding in chromosome segregation; is transferred to the kinetochore prior to mitosis	9.18662	0.158764	0.00146	0.0204435	12.371	-0.04	0.74	0.916595	RH
YNL077W	APJ1	14	481391	482977	W		Chaperone with a role in SUMO-mediated protein degradation; member of the DnaJ-like family; conserved across eukaryotes; overexpression interferes with propagation of the [Psi+] prion; the authentic, non-tagged protein is detected in highly purified mitochondria in high-throughput studies; forms nuclear foci upon DNA replication stress	9.90784	0.169749	0.000639146	0.0112831	9.048	-0.03	0.2	0.571744	RH
YFL026W	STE2	6	82580	83875	W	alpha-factor pheromone receptor STE2	Receptor for alpha-factor pheromone; seven transmembrane-domain GPCR that interacts with both pheromone and a heterotrimeric G protein to initiate the signaling response that leads to mating between haploid a and alpha cells	15.3974	0.138114	2.01108e-06	0.000100642	12.077	-0.02	0.46	0.790577	RH
YGL009C	LEU1	7	476313	478652	C	3-isopropylmalate dehydratase LEU1	Isopropylmalate isomerase; catalyzes the second step in the leucine biosynthesis pathway	18.0747	0.122579	0.000128286	0.00327193	14.031	-0.01	0.3	0.669251	RH
YGL224C	SDT1	7	78015	78857	C	nucleotidase|SSM1	Pyrimidine nucleotidase; responsible for production of nicotinamide riboside and nicotinic acid riboside; overexpression suppresses the 6-AU sensitivity of transcription elongation factor S-II, as well as resistance to other pyrimidine derivatives; SDT1 has a paralog, PHM8, that arose from the whole genome duplication	11.0443	0.131132	0.00107572	0.0163831	13.041	-0.01	0.77	0.925	RH
YDL235C	YPD1	4	33415	33918	C		Osmotic stress-responsive phosphorelay intermediate sensor protein; phosphorylated by the plasma membrane sensor Sln1p in response to osmotic stress and then in turn phosphorylates the response regulators Ssk1p in the cytosol and Skn7p in the nucleus	11.2278	0.103416	0.000566446	0.0102191	13.355	0	0.82	0.945171	RH
YDR289C	RTT103	4	1038280	1039509	C		Protein involved in transcription termination by RNA polymerase II; interacts with exonuclease Rat1p and Rai1p; has an RPR domain (carboxy-terminal domain interacting domain); also involved in regulation of Ty1 transposition	10.9765	0.126455	0.000164769	0.00403392	13.946	0	0.56	0.855189	RH
YER024W	YAT2	5	202192	204963	W	carnitine O-acetyltransferase YAT2	Carnitine acetyltransferase; has similarity to Yat1p, which is a carnitine acetyltransferase associated with the mitochondrial outer membrane	11.2686	0.18104	2.40877e-05	0.000884296	13.871	0	0.65	0.879112	RH
YER175C	TMT1	5	539464	540363	C	TAM1	Trans-aconitate methyltransferase; cytosolic enzyme that catalyzes the methyl esterification of 3-isopropylmalate, an intermediate of the leucine biosynthetic pathway, and trans-aconitate, which inhibits the citric acid cycle	11.7581	0.166562	0.00160246	0.0217224	15.032	0	0.69	0.897139	RH
YBR222C	PCS60	2	666720	668351	C	FAT2	Oxalyl-CoA synthetase; capable of catalyzing conversion of oxalate to oxalyl-CoA; catalyzes first step in pathway of oxalate degradation that functions to protect yeast from inhibitory effects of oxalate; peroxisomal protein that binds mRNA; localizes to both peroxisomal peripheral membrane and matrix, expression is highly inducible by oleic acid; similar to E. coli long chain acyl-CoA synthetase	12.1165	0.118439	0.00481262	0.0487617	14.953	0.01	0.95	0.979109	RH
YDR381C-A	YDR381C-A	4	1238312	1238850	C		Protein of unknown function; localized to the mitochondrial outer membrane	8.71586	0.167021	0.00136033	0.0194744	13.122	0.01	0.69	0.897139	RH
YEL007W	MIT1	5	141892	143892	W	TOS9	Transcriptional regulator of pseudohyphal growth; protein with sequence similarity to S. pombe gti1+ (gluconate transport inducer 1) and C. albicans Wor1	12.382	0.238853	2.41241e-05	0.000884296	11.362	0.01	0.94	0.976966	RH
YGR205W	TDA10	7	909213	910085	W	putative ATP-dependent kinase	ATP-binding protein of unknown function; crystal structure resembles that of E.coli pantothenate kinase and other small kinases; null mutant is sensitive to expression of the top1-T722A allele	9.72975	0.255897	8.14324e-07	4.42117e-05	13.441	0.01	0.76	0.921536	RH
YPL228W	CET1	16	118382	120031	W	polynucleotide 5'-phosphatase|CES5	RNA 5'-triphosphatase involved in mRNA 5' capping; subunit of mRNA capping enzyme, which is a heterotetramer composed of a Cet1p homodimer and two molecules of guanylyltransferase Ceg1p; Cet1p also has a role in regulation of RNAPII pausing at promoter-proximal sites; interaction between Cet1p and Ceg1p is required for Ceg1p nuclear import; mammalian enzyme is single bifunctional polypeptide; hum…	11.4939	0.0925923	0.00293881	0.0344458	14.251	0.02	0.22	0.594161	RH
YDR035W	ARO3	4	521816	522928	W	3-deoxy-7-phosphoheptulonate synthase ARO3	3-deoxy-D-arabino-heptulosonate-7-phosphate (DAHP) synthase; catalyzes the first step in aromatic amino acid biosynthesis and is feedback-inhibited by phenylalanine or high concentration of tyrosine or tryptophan	14.1751	0.106834	0.000778287	0.0129452	14.373	0.03	0.055	0.30438	RH
YDR533C	HSP31	4	1501447	1502160	C	glutathione-independent methylglyoxalase	Methylglyoxalase that converts methylglyoxal to D-lactate; involved in oxidative stress resistance, diauxic shift, and stationary phase survival; has similarity to E. coli Hsp31 and C. albicans Glx3p; member of the DJ-1/ThiJ/PfpI superfamily, which includes human DJ-1 involved in Parkinson's disease and cancer; exists as a dimer and contains a putative metal-binding site; protein abundance increa…	10.6597	0.16686	0.000770886	0.0128967	13.823	0.03	0.44	0.773659	RH
YJL165C	HAL5	10	106894	109461	C	protein kinase HAL5	Putative protein kinase; overexpression increases sodium and lithium tolerance, whereas gene disruption increases cation and low pH sensitivity and impairs potassium uptake, suggesting a role in regulation of Trk1p and/or Trk2p transporters; HAL5 has a paralog, KKQ8, that arose from the whole genome duplication	12.064	0.119837	0.0006431	0.0112916	12.72	0.03	0.83	0.948676	RH
YDL025C	RTK1	4	405344	407206	C	putative serine/threonine protein kinase RTK1	Putative protein kinase, potentially phosphorylated by Cdc28p; interacts with ribosome biogenesis factors, Cka2, Gus1 and Arc1; protein abundance increases in response to DNA replication stress	10.7596	0.170151	2.21501e-06	0.000109891	12.254	0.04	0.95	0.979109	RH
YLR257W	YLR257W	12	658826	659791	W		Protein of unknown function; protein abundance increases in response to DNA replication stress	12.6349	0.138577	7.97631e-05	0.00228707	14.164	0.04	0.065	0.333366	RH
YOR273C	TPO4	15	834452	836431	C		Polyamine transporter of the major facilitator superfamily; member of the 12-spanner drug:H(+) antiporter DHA1 family; recognizes spermine, putrescine, and spermidine; localizes to the plasma membrane	11.222	0.2266	0.000470254	0.00884494	11.512	0.04	0.88	0.960472	RH
YPL219W	PCL8	16	136750	138228	W		Cyclin; interacts with Pho85p cyclin-dependent kinase (Cdk) to phosphorylate and regulate glycogen synthase, also activates Pho85p for Glc8p phosphorylation; PCL8 has a paralog, PCL10, that arose from the whole genome duplication	9.36515	0.149934	0.00370189	0.0405977	12.65	0.04	0.7	0.900539	RH
YDR515W	SLF1	4	1473429	1474772	W	SRO99	RNA binding protein that associates with polysomes; may be involved in regulating mRNA translation; involved in the copper-dependent mineralization of copper sulfide complexes on cell surface in cells cultured in copper salts; SLF1 has a paralog, SRO9, that arose from the whole genome duplication; protein abundance increases in response to DNA replication stress	10.88	0.141884	4.37287e-05	0.00143828	12.516	0.05	0.25	0.628031	RH
YIL015W	BAR1	9	322342	324105	W	aspartyl protease BAR1|SST1	Aspartyl protease; secreted into the periplasmic space of mating type a cell; helps cells find mating partners; cleaves and inactivates alpha factor allowing cells to recover from alpha-factor-induced cell cycle arrest	14.1566	0.112086	3.62074e-07	2.1934e-05	12.601	0.05	0.27	0.64333	RH
YCL030C	HIS4	3	65934	68333	C	trifunctional histidinol dehydrogenase/phosphoribosyl-AMP cyclohydrolase/phosphoribosyl-ATP diphosphatase	Multifunctional enzyme containing phosphoribosyl-ATP pyrophosphatase; phosphoribosyl-AMP cyclohydrolase, and histidinol dehydrogenase activities; catalyzes the second, third, ninth and tenth steps in histidine biosynthesis	14.5451	0.140983	0.000338786	0.00679344	13.756	0.06	0.61	0.872873	RH
YCL035C	GRX1	3	60841	61173	C	dithiol glutaredoxin GRX1	Glutathione-dependent disulfide oxidoreductase; hydroperoxide and superoxide-radical responsive, heat-stable, with active site cysteine pair; protects cells from oxidative damage; GRX1 has a paralog, GRX2, that arose from the whole genome duplication; protein abundance increases in response to DNA replication stress	11.6899	0.144458	8.46691e-05	0.00236539	13.19	0.06	0.28	0.649821	RH
YER073W	ALD5	5	304030	305592	W	aldehyde dehydrogenase (NAD(P)(+)) ALD5	Mitochondrial aldehyde dehydrogenase; involved in regulation or biosynthesis of electron transport chain components and acetate formation; activated by K+; utilizes NADP+ as the preferred coenzyme; constitutively expressed	14.9145	0.0767986	0.00389381	0.0420429	13.886	0.06	0.19	0.560478	RH
YJL200C	ACO2	10	56444	58813	C	aconitate hydratase ACO2	Putative mitochondrial aconitase isozyme; similarity to Aco1p, an aconitase required for the TCA cycle; expression induced during growth on glucose, by amino acid starvation via Gcn4p, and repressed on ethanol	13.4166	0.101751	0.000660734	0.0115578	13.07	0.06	0.38	0.729577	RH
YBL107C	MIX23	2	9961	10551	C	MIC23	Mitochondrial intermembrane space protein of unknown function; imported via the MIA import machinery; contains an unusual twin cysteine motif (CX13C CX14C)	10.5007	0.11768	0.00153168	0.0209693	12.308	0.07	0.44	0.773659	RH
YGR186W	TFG1	7	867774	869981	W	transcription factor IIF subunit TFG1|RAP74|SSU71	TFIIF (Transcription Factor II) largest subunit; involved in both transcription initiation and elongation of RNA polymerase II; homologous to human RAP74	13.2322	0.0755489	0.00346803	0.0388298	13.432	0.07	0.14	0.488679	RH
YOR347C	PYK2	15	984942	986462	C	pyruvate kinase PYK2	Pyruvate kinase; appears to be modulated by phosphorylation; transcription repressed by glucose, and Pyk2p may be active under low glycolytic flux; PYK2 has a paralog, CDC19, that arose from the whole genome duplication	9.65118	0.160865	0.00336976	0.037951	12.29	0.07	0.4	0.743185	RH
YGR017W	YGR017W	7	523787	524680	W		Putative protein of unknown function; green fluorescent protein (GFP)-fusion protein localizes to both the nucleus and the cytoplasm	11.9688	0.118711	0.00169347	0.0227178	12.961	0.09	0.1	0.415064	RH
YJR059W	PTK2	10	545787	548243	W	protein kinase PTK2|STK2	Serine/threonine protein kinase; involved in regulation of ion transport across plasma membrane; carboxyl terminus is essential for glucose-dependent Pma1p activation via phosphorylation of Pma1p-Ser899; enhances spermine uptake; PTK2 has a paralog, PTK1, that arose from the whole genome duplication	11.3565	0.133171	0.00427497	0.0451817	13.692	0.09	0.16	0.51995	RH
YJR008W	MHO1	10	452430	453446	W		Protein of unknown function; inhibits haploid invasive growth when overexpressed; synthetically lethal with phospholipase C (PLC1); expression induced by mild heat-stress on a non-fermentable carbon source, upon entry into stationary phase and upon nitrogen deprivation; repressed by inosine and choline in an Opi1p-dependent manner; highly conserved from bacteria to human; Memo, the human homolog,…	9.69082	0.202242	0.000263736	0.00564239	13.757	0.1	0.075	0.361732	RH
YDL174C	DLD1	4	145826	147589	C	D-lactate dehydrogenase	Major mitochondrial D-lactate dehydrogenase; oxidizes D-lactate to pyruvate, transcription is heme-dependent, repressed by glucose, and derepressed in ethanol or lactate; located in the mitochondrial inner membrane	12.182	0.111389	0.000165422	0.00403392	12.995	0.11	0.21	0.586731	RH
YKL120W	OAC1	11	217344	218318	W		Mitochondrial inner membrane transporter; transports oxaloacetate, sulfate, thiosulfate, and isopropylmalate; member of the mitochondrial carrier family	15.2164	0.113025	0.000364215	0.00712088	14.103	0.11	0.62	0.874619	RH
YKR069W	MET1	11	571612	573393	W	uroporphyrinogen-III C-methyltransferase|MET20	S-adenosyl-L-methionine uroporphyrinogen III transmethylase; involved in the biosynthesis of siroheme, a prosthetic group used by sulfite reductase; required for sulfate assimilation and methionine biosynthesis	10.9147	0.166599	0.000236722	0.00516328	12.434	0.11	0.078	0.367978	RH
YDR516C	EMI2	4	1474974	1476476	C	putative glucokinase	Non-essential protein of unknown function; required for transcriptional induction of the early meiotic-specific transcription factor IME1; required for sporulation; expression regulated by glucose-repression transcription factors Mig1/2p; EMI2 has a paralog, GLK1, that arose from the whole genome duplication; protein abundance increases in response to DNA replication stress	11.9529	0.198944	7.82382e-05	0.00226262	13.612	0.12	0.15	0.507843	RH
YIL116W	HIS5	9	142928	144085	W	histidinol-phosphate transaminase	Histidinol-phosphate aminotransferase; catalyzes the seventh step in histidine biosynthesis; responsive to general control of amino acid biosynthesis; mutations cause histidine auxotrophy and sensitivity to Cu, Co, and Ni salts	12.9941	0.114625	0.00340365	0.0381832	14.518	0.12	0.29	0.662346	RH
YER123W	YCK3	5	404813	406387	W	casein kinase YCK3|CKI3	Palmitoylated vacuolar membrane-localized casein kinase I isoform; negatively regulates vacuole fusion during hypertonic stress via phosphorylation of Vps41p; shares essential functions with Hrr25p; regulates vesicle fusion in AP-3 pathway	11.6735	0.106401	0.00144711	0.020375	12.505	0.13	0.32	0.685525	RH
YGL082W	YGL082W	7	355827	356972	W		Putative protein of unknown function; predicted prenylation/proteolysis target of Afc1p and Rce1p; green fluorescent protein (GFP)-fusion protein localizes to the cytoplasm and nucleus; not an essential gene; YGL082W has a paralog, YPL191C, that arose from the whole genome duplication	11.5604	0.0938087	0.00427872	0.0451817	13.84	0.13	0.37	0.725985	RH
YIL114C	POR2	9	149143	149988	C	putative porin POR2|YVDAC2	Putative mitochondrial porin (voltage-dependent anion channel); not required for mitochondrial membrane permeability or mitochondrial osmotic stability; POR2 has a paralog, POR1, that arose from the whole genome duplication	10.4359	0.150158	0.000873026	0.0139563	11.46	0.14	0.21	0.586731	RH
YGL125W	MET13	7	272520	274322	W	methylenetetrahydrofolate reductase (NAD(P)H) MET13|MRPL45|MET11	Major isozyme of methylenetetrahydrofolate reductase; catalyzes the reduction of 5,10-methylenetetrahydrofolate to 5-methyltetrahydrofolate in the methionine biosynthesis pathway	12.1146	0.150852	5.03597e-05	0.00161011	14.698	0.15	0.48	0.8	RH
YJR010W	MET3	10	456239	457774	W	sulfate adenylyltransferase	ATP sulfurylase; catalyzes the primary step of intracellular sulfate activation, essential for assimilatory reduction of sulfate to sulfide, involved in methionine metabolism; human homolog PAPSS2 complements yeast null mutant	11.1878	0.159437	0.000822729	0.013528	13.51	0.15	0.16	0.51995	RH
YER142C	MAG1	5	455146	456036	C	MMS5	3-methyl-adenine DNA glycosylase; involved in protecting DNA against alkylating agents; initiates base excision repair by removing damaged bases to create abasic sites that are subsequently repaired; protein abundance increases in response to DNA replication stress	9.61413	0.131939	0.00285213	0.0337043	11.698	0.16	0.2	0.571744	RH
YGL184C	STR3	7	154615	156012	C	cystathionine beta-lyase STR3	Peroxisomal cystathionine beta-lyase; converts cystathionine into homocysteine; may be redox regulated by Gto1p; involved in the release of the aromatic thiol 3-mercaptohexanol during wine fermentation	9.40539	0.323779	2.54492e-07	1.62734e-05	11.557	0.18	0.43	0.76754	RH
YDR295C	HDA2	4	1052623	1054647	C	PLO2	Subunit of the HDA1 histone deacetylase complex; possibly tetrameric trichostatin A-sensitive class II histone deacetylase complex contains Hda1p homodimer and an Hda2p-Hda3p heterodimer; involved in telomere maintenance; relocalizes to the cytosol in response to hypoxia	11.0416	0.109381	0.000695973	0.0118852	12.586	0.19	0.17	0.530482	RH
YHR030C	SLT2	8	168890	170344	C	mitogen-activated serine/threonine-protein kinase SLT2|LYT2|SLK2|MPK1|BYC2	Serine/threonine MAP kinase; coordinates expression of all 19S regulatory particle assembly-chaperones (RACs) to control proteasome abundance; involved in regulating maintenance of cell wall integrity, cell cycle progression, nuclear mRNA retention in heat shock, septum assembly; required for mitophagy, pexophagy; affects recruitment of mitochondria to phagophore assembly site; plays role in adap…	11.9104	0.164884	0.00021396	0.00484779	13.057	0.25	0.13	0.470909	RH
YDL223C	HBT1	4	57265	60405	C		Shmoo tip protein, substrate of Hub1p ubiquitin-like protein; mutants are defective for mating projection formation, thereby implicating Hbt1p in polarized cell morphogenesis; HBT1 has a paralog, YNL195C, that arose from the whole genome duplication	9.79133	-0.0235152	0.666228	0.863361	11.872	-0.96	0.0001	0.00438983	PL
YBR072W	HSP26	2	382030	382674	W	chaperone protein HSP26	Small heat shock protein (sHSP) with chaperone activity; forms hollow, sphere-shaped oligomers that suppress unfolded proteins aggregation; long-lived protein that is preferentially retained in mother cells and forms cytoplasmic foci; oligomer activation requires heat-induced conformational change; also has mRNA binding activity	9.59492	-0.0761655	0.184941	0.477158	13.972	-0.76	0.0001	0.00438983	PL
YPR127W	YPR127W	16	790083	791120	W	pyridoxine 4-dehydrogenase	Putative pyridoxine 4-dehydrogenase; differentially expressed during alcoholic fermentation; expression activated by transcription factor YRM1/YOR172W; green fluorescent protein (GFP)-fusion protein localizes to both the cytoplasm and the nucleus	10.8641	-0.0497577	0.303963	0.608243	14.431	-0.36	0.0001	0.00438983	PL
YDR238C	SEC26	4	937895	940816	C	coatomer subunit beta	Essential beta-coat protein of the COPI coatomer; involved in ER-to-Golgi protein trafficking and maintenance of normal ER morphology; shares 43% sequence identity with mammalian beta-coat protein (beta-COP)	14.2407	-0.0358519	0.204981	0.503755	14.007	-0.34	0.001	0.0181119	PL
YDR233C	RTN1	4	929470	930357	C		Reticulon protein; involved in nuclear pore assembly and maintenance of tubular ER morphology; promotes membrane curvature; regulates the ER asymmetry-induced inheritance block during ER stress; role in ER-derived peroxisomal biogenesis; increases tubular ER when overexpressed; mutants have reduced phosphatidylserine transfer between the ER and mitochondria; interacts with exocyst subunit Sec6p, …	14.3722	-0.00485801	0.906314	0.967149	13.052	-0.29	0.003	0.047378	PL
YGL195W	GCN1	7	131525	139543	W	AAS103|NDR1	Positive regulator of the Gcn2p kinase activity; forms a complex with Gcn20p; proposed to stimulate Gcn2p activation by an uncharged tRNA	14.2273	-0.0187052	0.613321	0.831142	13.631	-0.29	0.0001	0.00438983	PL
YJL130C	URA2	10	165723	172367	C	bifunctional carbamoylphosphate synthetase/aspartate transcarbamylase	Bifunctional carbamoylphosphate synthetase/aspartate transcarbamylase; catalyzes the first two enzymatic steps in the de novo biosynthesis of pyrimidines; both activities are subject to feedback inhibition by UTP	14.5287	-0.0275248	0.520241	0.770444	13.806	-0.28	0.0001	0.00438983	PL
YNR038W	DBP6	14	695595	697484	W	putative ATP-dependent RNA helicase DBP6	Essential protein involved in ribosome biogenesis; putative ATP-dependent RNA helicase of the DEAD-box protein family; human homolog DDX51 complements yeast dbp6 mutant	12.2636	-0.0297559	0.403826	0.693694	12.058	-0.27	0.001	0.0181119	PL
YJL084C	ALY2	10	274862	278002	C	ART3	Alpha arrestin; controls nutrient-mediated intracellular sorting of permease Gap1p; interacts with AP-1 subunit Apl4p; phosphorylated by Npr1p and also by cyclin-CDK complex Pcl7p-Pho85p; promotes endocytosis of plasma membrane proteins; ALY2 has a paralog, ALY1, that arose from the whole genome duplication	10.9863	-0.0192309	0.671845	0.866085	11.786	-0.26	0.002	0.0329936	PL
YKL212W	SAC1	11	34543	36414	W	phosphatidylinositol-3-phosphatase SAC1|RSD1	Phosphatidylinositol phosphate (PtdInsP) phosphatase; involved in hydrolysis of PtdIns[4]P in the early and medial Golgi; regulated by interaction with Vps74p; ER localized transmembrane protein which cycles through the Golgi; involved in protein trafficking and processing, secretion, and cell wall maintenance; regulates sphingolipid biosynthesis through the modulation of PtdIns(4)P metabolism	13.6891	-0.0288911	0.242117	0.545276	13.367	-0.26	0.001	0.0181119	PL
YOR151C	RPB2	15	612997	616671	C	DNA-directed RNA polymerase II core subunit RPB2|B150|SOH2|SIT2|RPO22|RPB150	RNA polymerase II second largest subunit B150; part of central core; similar to bacterial beta subunit	14.2229	0.0235905	0.326886	0.633624	13.291	-0.26	0.0001	0.00438983	PL
YKL182W	FAS1	11	100671	106826	W	tetrafunctional fatty acid synthase subunit FAS1	Beta subunit of fatty acid synthetase; complex catalyzes the synthesis of long-chain saturated fatty acids; contains acetyltransacylase, dehydratase, enoyl reductase, malonyl transacylase, and palmitoyl transacylase activities	15.9269	-0.0063464	0.850208	0.942226	14.252	-0.25	0.0001	0.00438983	PL
YIL075C	RPN2	9	217863	220700	C	proteasome regulatory particle base subunit RPN2|SEN3	Subunit of the 26S proteasome; substrate of the N-acetyltransferase Nat1p; protein abundance increases in response to DNA replication stress	14.5234	0.0248181	0.296271	0.60258	13.526	-0.24	0.00075	0.0181119	PL
YBL076C	ILS1	2	81043	84261	C	isoleucine--tRNA ligase ILS1	Cytoplasmic isoleucine-tRNA synthetase; target of the G1-specific inhibitor reveromycin A	15.6982	-0.010642	0.611532	0.830128	13.909	-0.23	0.00019	0.00757077	PL
YMR012W	CLU1	13	291134	294967	W	translation initiation factor 3 subunit CLU1|TIF31	Subunit of the eukaryotic translation initiation factor 3 (eIF3); component of unknown function; deletion causes defects in mitochondrial organization but not in growth or translation initiation; can rescue cytokinesis and mitochondrial organization defects of the Dictyostelium cluA- mutant; eIF3 is also involved in programmed stop codon readthrough	14.6856	0.0577491	0.0929084	0.329275	13.694	-0.23	0.00064	0.0181119	PL
YDL140C	RPO21	4	205360	210561	C	DNA-directed RNA polymerase II core subunit RPO21|B220|SUA8|RPB220|RPB1	RNA polymerase II largest subunit B220; part of central core; phosphorylation of C-terminal heptapeptide repeat domain regulates association with transcription and splicing factors; similar to bacterial beta-prime	13.5075	0.00507045	0.888639	0.958058	13.079	-0.22	0.00011	0.00474833	PL
YMR145C	NDE1	13	554793	556475	C	NADH-ubiquinone reductase (H(+)-translocating) NDE1|NDH1	Mitochondrial external NADH dehydrogenase; type II NAD(P)H:quinone oxidoreductase that catalyzes the oxidation of cytosolic NADH; Nde1p and Nde2p provide cytosolic NADH to the mitochondrial respiratory chain; NDE1 has a paralog, NDE2, that arose from the whole genome duplication	13.1922	-0.0458192	0.375723	0.673141	13.94	-0.22	0.0006	0.0176591	PL
YGR019W	UGA1	7	525229	526644	W	4-aminobutyrate transaminase	Gamma-aminobutyrate (GABA) transaminase; also known as 4-aminobutyrate aminotransferase; involved in the 4-aminobutyrate and glutamate degradation pathways; required for normal oxidative stress tolerance and nitrogen utilization; protein abundance increases in response to DNA replication stress	11.5488	0.0102592	0.837155	0.937533	14.332	-0.21	0.0001	0.00438983	PL
YNL287W	SEC21	14	91994	94801	W	coatomer subunit gamma	Gamma subunit of coatomer; coatomer is a heptameric protein complex that together with Arf1p forms the COPI coat; involved in ER to Golgi transport of selective cargo	14.0318	0.00501472	0.84809	0.941322	13.957	-0.21	0.001	0.0181119	PL
YPL160W	CDC60	16	246990	250262	W	leucine--tRNA ligase CDC60|LeuRS	Cytosolic leucyl tRNA synthetase; ligates leucine to the appropriate tRNA; human homolog LARS can complement yeast temperature-sensitive mutant at restrictive temperature	15.3953	-0.0154876	0.555962	0.795363	13.432	-0.2	0.0001	0.00438983	PL
YDL145C	COP1	4	194571	198176	C	coatomer subunit alpha|SOO1|RET1|SEC33	Alpha subunit of COPI vesicle coatomer complex; complex surrounds transport vesicles in the early secretory pathway	14.2747	0.0281692	0.484852	0.75049	13.435	-0.19	0.00089	0.0181119	PL
YDR170C	SEC7	4	796193	802222	C	Arf family guanine nucleotide exchange factor SEC7	Guanine nucleotide exchange factor (GEF) for ADP ribosylation factors; involved in proliferation of the Golgi, intra-Golgi transport and ER-to-Golgi transport; found in the cytoplasm and on Golgi-associated coated vesicles	13.4252	0.0010352	0.979964	0.993529	13.102	-0.19	0.00034	0.0117413	PL
YGL206C	CHC1	7	102543	107504	C	clathrin heavy chain|SWA5	Clathrin heavy chain; subunit of the major coat protein involved in intracellular protein transport and endocytosis; the clathrin triskelion is a trimeric molecule composed of three heavy chains that radiate from a vertex and three light chains which bind noncovalently near the vertex of the triskelion; the light chain (CLC1) is thought to regulate function	13.0949	0.0411321	0.352648	0.654462	13.484	-0.19	0.001	0.0181119	PL
YPL226W	NEW1	16	121767	125357	W		ATP binding cassette protein; cosediments with polysomes and is required for biogenesis of the small ribosomal subunit; Asn/Gln-rich rich region supports [NU+] prion formation and susceptibility to [PSI+] prion induction	14.7568	-0.0261199	0.375543	0.673141	13.297	-0.19	0.0001	0.00438983	PL
YGL173C	XRN1	7	175527	180113	C	chromatin-binding exonuclease XRN1|KEM1|SKI1|SEP1|RAR5|DST2	Evolutionarily-conserved 5'-3' exonuclease; component of cytoplasmic processing (P) bodies involved in mRNA decay; also enters the nucleus and positively regulates transcription initiation and elongation; plays a role in microtubule-mediated processes, filamentous growth, ribosomal RNA maturation, and telomere maintenance; activated by the scavenger decapping enzyme Dcs1p	13.809	0.026391	0.566865	0.802535	13.564	-0.18	0.0001	0.00438983	PL
YGR061C	ADE6	7	611889	615965	C	phosphoribosylformylglycinamidine synthase	Formylglycinamidine-ribonucleotide (FGAM)-synthetase; catalyzes a step in the 'de novo' purine nucleotide biosynthetic pathway	14.0198	-0.0306539	0.418552	0.706324	13.837	-0.18	0.0001	0.00438983	PL
YGR094W	VAS1	7	672186	675500	W	valine--tRNA ligase	Mitochondrial and cytoplasmic valyl-tRNA synthetase; human homolog VARS2 implicated in mitochondrial diseases, can partially complement yeast null mutant	15.5914	0.0081721	0.723557	0.891648	13.971	-0.18	0.00017	0.00687969	PL
YNR016C	ACC1	14	654673	661374	C	acetyl-CoA carboxylase ACC1|MTR7|FAS3|ABP2	Acetyl-CoA carboxylase, biotin containing enzyme; catalyzes carboxylation of cytosolic acetyl-CoA to form malonyl-CoA and regulates histone acetylation by regulating the availablity of acetyl-CoA; required for de novo biosynthesis of long-chain fatty acids; ACC1 has a paralog, HFA1, that arose from the whole genome duplication	15.477	-0.050846	0.121062	0.381056	13.511	-0.18	0.0001	0.00438983	PL
YOR048C	RAT1	15	418630	421650	C	ssRNA exonuclease RAT1|XRN2|TAP1|HKE1	Nuclear 5' to 3' single-stranded RNA exonuclease; involved in RNA metabolism, including rRNA and snoRNA processing, as well as poly (A+) dependent and independent mRNA transcription termination; required for cotranscriptional pre-rRNA cleavage; displaces Cdk1p from elongating transcripts, especially as RNAPII reaches the poly(A) site, negatively regulates phosphorylation of the CTD of RNAPII, and…	12.768	-0.0053994	0.864872	0.949873	12.005	-0.18	0.001	0.0181119	PL
YPL231W	FAS2	16	108652	114315	W	trifunctional fatty acid synthase subunit FAS2	Alpha subunit of fatty acid synthetase; complex catalyzes the synthesis of long-chain saturated fatty acids; contains the acyl-carrier protein domain and beta-ketoacyl reductase, beta-ketoacyl synthase and self-pantetheinylation activities	16.0473	-0.00166877	0.9619	0.985739	13.73	-0.18	0.0001	0.00438983	PL
YGR240C	PFK1	7	970771	973734	C	6-phosphofructokinase subunit alpha	Alpha subunit of heterooctameric phosphofructokinase; involved in glycolysis, indispensable for anaerobic growth, activated by fructose-2,6-bisphosphate and AMP, mutation inhibits glucose induction of cell cycle-related genes	15.6162	-0.0190499	0.511188	0.766853	14.066	-0.17	0.0001	0.00438983	PL
YKL014C	URB1	11	411619	416913	C	NPA1	Protein required for the normal accumulation of 25S and 5.8S rRNAs; nucleolar protein; associated with the 27SA2 pre-ribosomal particle; proposed to be involved in the biogenesis of the 60S ribosomal subunit	13.2655	0.0289951	0.44661	0.724802	12.681	-0.17	0.001	0.0181119	PL
YLR106C	MDN1	12	349006	363738	C	AAA family ATPase midasin|REA1	Huge dynein-related AAA-type ATPase (midasin); forms extended pre-60S particle with the Rix1 complex (Rix1p-Ipi1p-Ipi3p); acts in removal of ribosomal biogenesis factors at successive steps of pre-60S assembly and export from nucleus	14.2161	0.0191355	0.641952	0.849553	13.171	-0.17	0.00072	0.0181119	PL
YML072C	TCB3	13	124730	129367	C		Cortical ER protein involved in ER-plasma membrane tethering; one of 6 proteins (Ist2p, Scs2p, Scs22p, Tcb1p, Tcb2p, Tcb3p) that connect ER to the plasma membrane (PM) and regulate PM phosphatidylinositol-4-phosphate (PI4P) levels by controlling access of Sac1p phosphatase to its substrate PI4P in the PM; localized to the bud via specific mRNA transport; non-tagged protein detected in a phosphory…	14.2057	0.0143551	0.710268	0.883994	12.659	-0.17	0.00043	0.0137494	PL
YMR229C	RRP5	13	725934	731123	C		RNA binding protein involved in synthesis of 18S and 5.8S rRNAs; component of ribosomal small subunit (SSU) processome and 90S preribosome; required for pre-rRNA packaging and compaction of processome into dense terminal balls; part of Mak21p-Noc2p-Rrp5p module that associates with nascent pre-rRNA during transcription with role in biogenesis of large ribosomal subunit; binds single stranded trac…	14.4708	-0.00262667	0.937924	0.978208	14.133	-0.17	0.0001	0.00438983	PL
YOR341W	RPA190	15	960987	965981	W	DNA-directed RNA polymerase I core subunit RPA190|A190|RRN1	RNA polymerase I largest subunit A190	14.6655	-0.0215644	0.470781	0.740954	14.208	-0.16	0.001	0.0181119	PL
YBR079C	RPG1	2	395383	398277	C	translation initiation factor eIF3 core subunit a|TIF32	eIF3a subunit of the eukaryotic translation initiation factor 3 (eIF3); subunit of the core complex of eIF3; essential for translation; part of a Prt1p-Rpg1p-Nip1p subcomplex that stimulates binding of mRNA and tRNA(i)Met to ribosomes; involved in translation reinitiation; eIF3 is also involved in programmed stop codon readthrough	14.458	-0.015168	0.672095	0.866085	14.309	-0.15	0.00056	0.016969	PL
YHR027C	RPN1	8	161730	164711	C	proteasome regulatory particle base subunit RPN1|NAS1|HRD2	Non-ATPase base subunit of the 19S RP of the 26S proteasome; may participate in the recognition of several ligands of the proteasome; contains a leucine-rich repeat (LRR) domain, a site for protein-protein interactions; RP is the acronym for regulatory particle	14.5899	0.00705979	0.771977	0.910575	13.982	-0.15	0.001	0.0181119	PL
YDR127W	ARO1	4	704484	709250	W	pentafunctional protein ARO1p	Pentafunctional arom protein; catalyzes steps 2 through 6 in the biosynthesis of chorismate, which is a precursor to aromatic amino acids	13.7947	0.060803	0.110211	0.361386	14.038	-0.14	0.00012	0.0050129	PL
YAL035W	FUN12	1	76427	79435	W	translation initiation factor eIF5B|eIF5B|yIF2	Translation initiation factor eIF5B; GTPase that promotes Met-tRNAiMet binding to ribosomes and ribosomal subunit joining; promotes GTP-dependent maturation of 18S rRNA by Nob1p; protein abundance increases in response to DNA replication stress; homolog of bacterial IF2	15.2795	-0.0333282	0.181122	0.471016	13.942	-0.13	0.002	0.0329936	PL
YER120W	SCS2	5	401135	401869	W	phosphatidylinositol-binding protein SCS2	Integral ER membrane protein, regulates phospholipid metabolism; one of 6 proteins (Ist2p, Scs2p, Scs22p, Tcb1p, Tcb2p, Tcb3p) that connect ER to plasma membrane (PM) and regulate PI4P levels by controlling access of Sac1p phosphatase to substrate PI4P in the PM; interacts with FFAT motifs in Opi1p, Swh1p, Osh2p, and Osh3p; involved in telomeric silencing; VAP homolog; SCS2 has a paralog, SCS22, …	12.9757	-0.035262	0.383779	0.679165	12.594	-0.13	0.001	0.0181119	PL
YKL210W	UBA1	11	39163	42237	W	E1 ubiquitin-activating protein UBA1	Ubiquitin activating enzyme (E1); involved in ubiquitin-mediated protein degradation and essential for viability; protein abundance increases in response to DNA replication stress	14.5166	0.00779638	0.740382	0.897876	13.657	-0.13	0.001	0.0181119	PL
YMR205C	PFK2	13	671887	674766	C	6-phosphofructokinase subunit beta	Beta subunit of heterooctameric phosphofructokinase; involved in glycolysis; indispensable for anaerobic growth; activated by fructose-2,6-bisphosphate and AMP; mutation inhibits glucose induction of cell cycle-related genes	14.9083	-0.0151841	0.678257	0.86701	13.817	-0.13	0.001	0.0181119	PL
YEL060C	PRB1	5	40046	41953	C	proteinase B|CVT1	Vacuolar proteinase B (yscB) with H3 N-terminal endopeptidase activity; serine protease of the subtilisin family; involved in protein degradation in the vacuole and required for full protein degradation during sporulation; activity inhibited by Pbi2p; protein abundance increases in response to DNA replication stress; PRB1 has a paralog, YSP3, that arose from the whole genome duplication	10.9885	-0.0401358	0.494557	0.757566	14.39	-0.12	0.0001	0.00438983	PL
YMR031C	EIS1	13	332212	334743	C		Component of the eisosome required for proper eisosome assembly; similar to Uso1p; authentic, non-tagged protein is detected in a phosphorylated state in highly purified mitochondria in high-throughput studies; protein increases in abundance and relocalizes from plasma membrane to cytoplasm upon DNA replication stress; EIS1 has a paralog, YKL050C, that arose from the whole genome duplication	12.4776	-0.0485149	0.233045	0.535185	13.779	-0.12	0.0001	0.00438983	PL
YAL025C	MAK16	1	100225	101145	C	ribosome biosynthesis protein MAK16	Essential nuclear protein; constituent of 66S pre-ribosomal particles; required for maturation of 25S and 5.8S rRNAs; required for maintenance of M1 satellite double-stranded RNA of the L-A virus	13.2874	-0.0583525	0.167436	0.451969	14.662	-0.11	0.002	0.0329936	PL
YAR015W	ADE1	1	169375	170295	W	phosphoribosylaminoimidazolesuccinocarboxamide synthase	N-succinyl-5-aminoimidazole-4-carboxamide ribotide synthetase; required for 'de novo' purine nucleotide biosynthesis; red pigment accumulates in mutant cells deprived of adenine; protein abundance increases in response to DNA replication stress	12.4966	-0.0497441	0.140954	0.414295	14.435	-0.1	0.001	0.0181119	PL
YIL118W	RHO3	9	139752	140447	W	Rho family GTPase RHO3	Non-essential small GTPase of the Rho/Rac family of Ras-like proteins; involved in the establishment of cell polarity; GTPase activity positively regulated by the GTPase activating protein (GAP) Rgd1p	12.0757	-0.00448242	0.8937	0.959918	14.391	-0.1	0.001	0.0181119	PL
YPR004C	AIM45	16	564007	565041	C		Putative ortholog of mammalian ETF-alpha; interacts with frataxin, Yfh1p; null mutant displays elevated frequency of mitochondrial genome loss; may have a role in oxidative stress response; ETF-alpha is an electron transfer flavoprotein complex subunit	12.3998	-0.0261785	0.39427	0.687403	14.202	-0.08	0.001	0.0181119	PL
YER165W	PAB1	5	510373	512106	W	polyadenylate-binding protein	Poly(A) binding protein; part of the 3'-end RNA-processing complex, mediates interactions between the 5' cap structure and the 3' mRNA poly(A) tail, involved in control of poly(A) tail length, interacts with translation factor eIF-4G; stimulates, but is not required for the deadenylation activity of the Pan2p-Pan3p poly(A)-ribonuclease complex	14.9619	-0.0248944	0.493544	0.757022	13.993	0.06	0.001	0.0181119	PH
YDR348C	PAL1	4	1170326	1171825	C		Protein of unknown function thought to be involved in endocytosis; physically interacts with Ede1p and is found at endocytic sites at cell periphery during early stages of endocytosis; green fluorescent protein (GFP)-fusion protein localizes to bud neck; potential Cdc28p substrate; similar to S. pombe Pal1 protein; relocalizes from bud neck to cytoplasm upon DNA replication stress; PAL1 has a par…	12.0876	0.00353924	0.927938	0.97486	12.994	0.07	0.001	0.0181119	PH
YER023W	PRO3	5	201076	201936	W	pyrroline-5-carboxylate reductase|ORE2	Delta 1-pyrroline-5-carboxylate reductase; catalyzes the last step in proline biosynthesis	13.355	-0.103182	0.000109526	0.0028776	14.582	0.07	0.001	0.0181119	PH
YBR263W	SHM1	2	736264	737736	W	glycine hydroxymethyltransferase SHM1|TMP3|SHMT1	Mitochondrial serine hydroxymethyltransferase; converts serine to glycine plus 5,10 methylenetetrahydrofolate; involved in generating precursors for purine, pyrimidine, amino acid, and lipid biosynthesis; reverse reaction generates serine	13.5707	-0.0200632	0.40933	0.699018	14.692	0.08	0.002	0.0329936	PH
YGR178C	PBP1	7	851047	853215	C	MRS16	Component of glucose deprivation induced stress granules; involved in P-body-dependent granule assembly; similar to human ataxin-2; interacts with Pab1p to regulate mRNA polyadenylation; interacts with Mkt1p to regulate HO translation; protein increases in abundance and relative distribution to the nucleus increases upon DNA replication stress	13.199	-0.00265619	0.944831	0.98203	13.877	0.08	0.00028	0.0098	PH
YLR196W	PWP1	12	543968	545698	W	rRNA-processing protein PWP1	Protein with WD-40 repeats involved in rRNA processing; associates with trans-acting ribosome biogenesis factors; similar to beta-transducin superfamily	13.9758	-0.0431209	0.188319	0.481892	14.638	0.08	0.001	0.0181119	PH
YDR381W	YRA1	4	1236558	1238004	W	RNA-binding protein YRA1|SHE11	Nuclear polyadenylated RNA-binding protein; required for export of poly(A)+ mRNA from the nucleus; proposed to couple mRNA export with 3' end processing via its interactions with Mex67p and Pcf11p; interacts with DBP2; inhibits the helicase activity of Dbp2; functionally redundant with Yra2p, another REF family member	13.6309	0.00588335	0.866883	0.951068	14.299	0.09	0.00083	0.0181119	PH
YJR045C	SSC1	10	519638	521602	C	Hsp70 family ATPase SSC1|mtHSP70|ENS1	Hsp70 family ATPase; constituent of the import motor component of the Translocase of the Inner Mitochondrial membrane (TIM23 complex); involved in protein translocation and folding; subunit of SceI endonuclease; SSC1 has a paralog, ECM10, that arose from the whole genome duplication	14.8694	0.0353803	0.390257	0.684631	12.226	0.09	0.0001	0.00438983	PH
YLR287C	YLR287C	12	710991	712058	C		Putative protein of unknown function; green fluorescent protein (GFP)-fusion protein localizes to the cytoplasm; YLR287C is not an essential gene	11.708	-0.0367564	0.277889	0.58028	14.243	0.09	0.002	0.0329936	PH
YNL037C	IDH1	14	557920	559002	C	isocitrate dehydrogenase (NAD(+)) IDH1	Subunit of mitochondrial NAD(+)-dependent isocitrate dehydrogenase; complex catalyzes the oxidation of isocitrate to alpha-ketoglutarate in the TCA cycle	12.6156	-0.017476	0.647012	0.851403	14.854	0.09	0.00038	0.0124582	PH
YBL051C	PIN4	2	122753	124759	C	MDT1	Protein involved in G2/M phase progression and response to DNA damage; interacts with Rad53p; contains an RNA recognition motif, a nuclear localization signal, and several SQ/TQ cluster domains; hyperphosphorylated in response to DNA damage	12.292	0.0626297	0.201343	0.501398	13.796	0.1	0.00051	0.0159145	PH
YER068W	MOT2	5	293050	294813	W	CCR4-NOT core ubiquitin-protein ligase subunit MOT2|SIG1|NOT4	Ubiquitin-protein ligase subunit of the CCR4-NOT complex; with Ubc4p, ubiquitinates nascent polypeptide-associated complex subunits and histone demethyase Jhd2p; CCR4-NOT has roles in transcription regulation, mRNA degradation, and post-transcriptional modifications; regulates levels of DNA Polymerase-{alpha} to promote efficient and accurate DNA replication	11.621	0.037736	0.38312	0.679086	13.482	0.1	0.0022	0.0360633	PH
YFL022C	FRS2	6	93499	95010	C	phenylalanine--tRNA ligase subunit alpha	Alpha subunit of cytoplasmic phenylalanyl-tRNA synthetase; forms a tetramer with Frs1p to form active enzyme; evolutionarily distant from mitochondrial phenylalanyl-tRNA synthetase based on protein sequence, but substrate binding is similar	14.0999	-0.0191224	0.586256	0.81616	13.878	0.1	0.001	0.0181119	PH
YJL026W	RNR2	10	392404	393603	W	ribonucleotide-diphosphate reductase subunit RNR2|CRT6	Ribonucleotide-diphosphate reductase (RNR), small subunit; the RNR complex catalyzes the rate-limiting step in dNTP synthesis and is regulated by DNA replication and DNA damage checkpoint pathways via localization of the small subunits; RNR2 has a paralog, RNR4, that arose from the whole genome duplication	13.705	-0.094549	0.00259142	0.0315299	13.764	0.1	0.00026	0.00962	PH
YJR076C	CDC11	10	575354	576601	C	septin CDC11|PSL9	Component of the septin ring that is required for cytokinesis; present at the ends of rod-like septin hetero-oligomers; C-terminal extension is important for recruitment of Bni5p to the mother-bud neck, which in turn is required for Myo1p recruitment and cytokinesis; septin rings at the mother-bud neck act as scaffolds for recruiting cell division factors and as barriers to prevent diffusion of s…	12.591	0.00234925	0.928674	0.975268	14.059	0.1	0.00074	0.0181119	PH
YLR172C	DPH5	12	501260	502162	C	diphthine synthase	Methyltransferase required for synthesis of diphthamide; diphthamide is a modified histidine residue of translation elongation factor 2 (Eft1p or Eft2p); not essential for viability; GFP-Dph5p fusion protein localizes to the cytoplasm	12.8422	0.00806944	0.820061	0.930161	15.345	0.1	0.0001	0.00438983	PH
YLR387C	REH1	12	896374	897672	C		Cytoplasmic 60S subunit biogenesis factor; associates with pre-60S particles; similar to Rei1p and shares partially redundant function in cytoplasmic 60S subunit maturation; contains dispersed C2H2 zinc finger domains	12.1942	0.0416823	0.27076	0.574144	14.968	0.1	0.00069	0.0181119	PH
YLR399C	BDF1	12	919536	921596	C	chromatin-binding protein BDF1	Protein involved in transcription initiation; functions at TATA-containing promoters; associates with the basal transcription factor TFIID; contains two bromodomains; corresponds to the C-terminal region of mammalian TAF1; redundant with Bdf2p; BDF1 has a paralog, BDF2, that arose from the whole genome duplication	13.0284	0.0407626	0.232648	0.534875	14.324	0.1	0.00057	0.016969	PH
YBR149W	ARA1	2	539987	541021	W	D-arabinose 1-dehydrogenase (NAD(P)(+)) ARA1	NADP+ dependent arabinose dehydrogenase; involved in carbohydrate metabolism; purified as homodimer; naturally occurs with a N-terminus degradation product	13.1175	0.0517265	0.153223	0.431408	14.317	0.11	0.0001	0.00438983	PH
YER080W	AIM9	5	319963	321846	W	FMP29	Protein of unknown function; the authentic, non-tagged protein is detected in highly purified mitochondria in high-throughput studies; null mutant displays elevated frequency of mitochondrial genome loss	12.6335	0.0694846	0.0614051	0.256822	13.75	0.11	0.001	0.0181119	PH
YLR354C	TAL1	12	836350	837357	C	sedoheptulose-7-phosphate:D-glyceraldehyde-3-phosphate transaldolase TAL1	Transaldolase, enzyme in the non-oxidative pentose phosphate pathway; converts sedoheptulose 7-phosphate and glyceraldehyde 3-phosphate to erythrose 4-phosphate and fructose 6-phosphate; TAL1 has a paralog, NQM1, that arose from the whole genome duplication	14.7386	-0.0191558	0.614659	0.832353	14.293	0.11	0.00025	0.00938406	PH
YPL106C	SSE1	16	350194	352275	C	adenyl-nucleotide exchange factor SSE1|MSI3|LPG3	ATPase component of heat shock protein Hsp90 chaperone complex; serves as nucleotide exchange factor to load ATP onto the SSA class of cytosolic Hsp70s; plays a role in prion propagation and determining prion variants; binds unfolded proteins; member of Hsp110 subclass of HSP70 proteins; deletion results in spindle elongation in S phase; SSE1 has a paralog, SSE2, that arose from the whole genome …	16.0525	-0.0260336	0.465405	0.737447	13.724	0.11	0.001	0.0181119	PH
YBR200W	BEM1	2	620872	622527	W	phosphatidylinositol-3-phosphate-binding protein BEM1|SRO1	Protein containing SH3-domains; involved in establishing cell polarity and morphogenesis; functions as a scaffold protein for complexes that include Cdc24p, Ste5p, Ste20p, and Rsr1p	11.4323	0.00859812	0.809177	0.925624	13.481	0.12	0.00027	0.0098	PH
YDR234W	LYS4	4	931129	933210	W	homoaconitate hydratase LYS4|LYS3	Homoaconitase; catalyzes the conversion of homocitrate to homoisocitrate, which is a step in the lysine biosynthesis pathway	13.073	0.0470518	0.138877	0.412403	13.328	0.12	0.002	0.0329936	PH
YGR119C	NUP57	7	728046	729671	C	FG-nucleoporin NUP57	FG-nucleoporin component of central core of the nuclear pore complex; contributes directly to nucleocytoplasmic transport and maintenance of the nuclear pore complex (NPC) permeability barrier; found in stable complex with Nic96p and two other FG-nucleoproteins (Nsp1p and Nup49p)	12.784	0.0316839	0.257559	0.560823	13.378	0.12	0.0001	0.00438983	PH
YIL142W	CCT2	9	83302	84885	W	chaperonin-containing T-complex subunit CCT2|TCP2|BIN3	Subunit beta of the cytosolic chaperonin Cct ring complex; related to Tcp1p, required for the assembly of actin and tubulins in vivo	14.2112	-0.0422535	0.121474	0.381805	14.734	0.12	0.0001	0.00438983	PH
YNL229C	URE2	14	219137	220201	C	[URE3]	Nitrogen catabolite repression transcriptional regulator; inhibits GLN3 transcription in good nitrogen source; role in sequestering Gln3p and Gat1p to the cytoplasm; has glutathione peroxidase activity and can mutate to acquire GST activity; self-assembly under limited nitrogen conditions creates [URE3] prion and releases catabolite repression	12.2029	0.0438308	0.161777	0.442863	14.101	0.12	0.0001	0.00438983	PH
YPR088C	SRP54	16	711403	713028	C	RNA-binding signal recognition particle subunit SRP54|SRH1	Signal recognition particle (SRP) subunit (homolog of mammalian SRP54); contains the signal sequence-binding activity of SRP, interacts with the SRP RNA, and mediates binding of SRP to signal receptor; contains GTPase domain	13.3214	-0.0793511	0.00326391	0.0369652	13.864	0.12	0.001	0.0181119	PH
YLR058C	SHM2	12	257992	259401	C	glycine hydroxymethyltransferase SHM2|SHMT2	Cytosolic serine hydroxymethyltransferase; converts serine to glycine plus 5,10 methylenetetrahydrofolate; major isoform involved in generating precursors for purine, pyrimidine, amino acid, and lipid biosynthesis	14.4148	-0.0093204	0.784194	0.915053	15.078	0.13	0.00012	0.0050129	PH
YLR369W	SSQ1	12	859552	861525	W	Hsp70 family ATPase SSQ1|SSH1|SSC2	Mitochondrial hsp70-type molecular chaperone; required for assembly of iron/sulfur clusters into proteins at a step after cluster synthesis, and for maturation of Yfh1p, which is a homolog of human frataxin implicated in Friedreich's ataxia	11.4628	0.0408242	0.173493	0.462247	13.406	0.13	0.0001	0.00438983	PH
YML114C	TAF8	13	42043	43575	C	TafII65|TAF65	TFIID subunit (65 kDa); involved in RNA polymerase II transcription initiation	11.0191	0.0144733	0.743108	0.899141	13.178	0.13	0.001	0.0181119	PH
YNL274C	GOR1	14	121118	122170	C	glyoxylate reductase	Glyoxylate reductase; null mutation results in increased biomass after diauxic shift; the authentic, non-tagged protein is detected in highly purified mitochondria in high-throughput studies; protein abundance increases in response to DNA replication stress	10.6624	0.0988163	0.088737	0.319908	13.794	0.13	0.00037	0.0122859	PH
YOL109W	ZEO1	15	110297	110638	W		Peripheral membrane protein of the plasma membrane; interacts with Mid2p; regulates the cell integrity pathway mediated by Pkc1p and Slt2p; the authentic protein is detected in a phosphorylated state in highly purified mitochondria	14.8467	0.0647107	0.0983422	0.340021	13.517	0.13	0.00013	0.00534444	PH
YPR112C	MRD1	16	749256	751919	C	RNA-binding ribosome biosynthesis protein MRD1	Essential conserved small ribosomal subunit (40s) synthesis factor; component of the 90S preribosome; required for production of 18S rRNA and small ribosomal subunit; contains five consensus RNA-binding domains and binds to the pre-rRNA at two sites within the 18S region	13.5166	-0.0244286	0.441531	0.723189	13.253	0.13	0.001	0.0181119	PH
YHR064C	SSZ1	8	225525	227141	C	PDR13	Hsp70 protein that interacts with Zuo1p (a DnaJ homolog); interacts with Zuo1p to form a ribosome-associated complex that binds the ribosome via the Zuo1p subunit; also involved in pleiotropic drug resistance via sequential activation of PDR1 and PDR5; binds ATP	15.315	-0.0656636	0.0394401	0.202117	14.517	0.14	0.0001	0.00438983	PH
YHR207C	SET5	8	514905	516485	C	S-adenosylmethionine-dependent methyltransferase	Methyltransferase involved in methylation of histone H4 Lys5, -8, -12; S-adenosylmethionine-dependent; zinc-finger protein, contains one canonical and two unusual fingers in unusual arrangements; deletion enhances replication of positive-strand RNA virus	11.3954	0.0120042	0.724496	0.891648	13.768	0.14	0.003	0.047378	PH
YKL151C	NNR2	11	164917	165930	C	NADHX dehydratase	Widely-conserved NADHX dehydratase; converts (S)-NADHX to NADH in ATP-dependent manner; YKL151C promoter contains STREs (stress response elements) and expression is induced by heat shock or methyl methanesulfonate; downstream intergenic region drives antisense expression and mediates coordinated regulation of YKL151C and GPM1 phosphoglycerate mutase; protein abundance increases in response to DNA…	10.9674	0.0494484	0.273943	0.576092	13.537	0.14	0.00046	0.0145293	PH
YNR001C	CIT1	14	629622	631061	C	citrate (Si)-synthase CIT1|LYS6|CS1	Citrate synthase; catalyzes the condensation of acetyl coenzyme A and oxaloacetate to form citrate; the rate-limiting enzyme of the TCA cycle; nuclear encoded mitochondrial protein; CIT1 has a paralog, CIT2, that arose from the whole genome duplication	12.9734	0.00990612	0.834938	0.937285	14.706	0.14	0.00086	0.0181119	PH
YOR090C	PTC5	15	491123	492841	C	type 2C protein phosphatase PTC5|PPP1	Mitochondrial type 2C protein phosphatase (PP2C); involved in regulation of pyruvate dehydrogenase activity by dephosphorylating the serine 133 of the Pda1p subunit; localizes to the intermembrane space and is imported via the presequence pathway and processed by the inner membrane protease (Imp1p-Imp2p); acts in concert with kinases Pkp1p and Pkp2p and phosphatase Ptc6p	11.7064	-0.0308759	0.446907	0.724802	12.942	0.14	0.0001	0.00438983	PH
YBL064C	PRX1	2	100371	101156	C	thioredoxin peroxidase PRX1	Mitochondrial peroxiredoxin with thioredoxin peroxidase activity; has a role in reduction of hydroperoxides; reactivation requires Trr2p and glutathione; induced during respiratory growth and oxidative stress; phosphorylated; protein abundance increases in response to DNA replication stress	11.4319	0.0848778	0.0668046	0.270393	14.899	0.15	0.0001	0.00438983	PH
YBR196C	PGI1	2	612236	613900	C	glucose-6-phosphate isomerase|CDC30	Glycolytic enzyme phosphoglucose isomerase; catalyzes the interconversion of glucose-6-phosphate and fructose-6-phosphate; required for cell cycle progression and completion of the gluconeogenic events of sporulation	16.704	-0.0688717	0.0306412	0.171737	13.888	0.15	0.0001	0.00438983	PH
YFR051C	RET2	6	250163	251803	C	coatomer subunit delta	Delta subunit of the coatomer complex (COPI); COPI coats Golgi-derived transport vesicles; involved in retrograde transport between Golgi and ER	13.0907	-0.076296	0.0275743	0.16127	14.334	0.15	0.0001	0.00438983	PH
YGR145W	ENP2	7	781767	783890	W	ribosome biosynthesis protein ENP2	Component of the SSU; required for pre-18S rRNA processing, biogenesis of the small ribosomal subunit; interacts with U3 snoRNA, Mpp10p and Bfr2p; contains WD repeats, and has homology to Spb1p	13.4311	-0.0154166	0.635528	0.846439	14.34	0.15	0.0013	0.0233819	PH
YJL008C	CCT8	10	419957	421663	C	chaperonin-containing T-complex subunit CCT8	Subunit of the cytosolic chaperonin Cct ring complex; related to Tcp1p, required for the assembly of actin and tubulins in vivo	14.1032	-0.0314993	0.163551	0.445474	14.651	0.15	0.002	0.0329936	PH
YMR273C	ZDS1	13	811233	813980	C	OSS1|NRC1|CKM1|CES1	Protein with a role in regulating Swe1p-dependent polarized growth; involved in maintaining Cdc55p in the cytoplasm where it promotes mitotic entry; involved in mitotic exit through Cdc14p regulation; interacts with silencing proteins at telomeres; has a role in Bcy1p localization; implicated in mRNA nuclear export; ZDS1 has a paralog, ZDS2, that arose from the whole genome duplication	11.2047	0.0405162	0.341829	0.647856	13.149	0.15	0.002	0.0329936	PH
YDL126C	CDC48	4	236157	238664	C	AAA family ATPase CDC48	AAA ATPase; subunit of polyUb-selective segregase complex involved in ERAD, INM-associated degradation (INMAD), mitotic spindle disassembly, macroautophagy, PMN, ribosome-associated degradation, ribophagy, homotypic ER membrane fusion, SCF complex disassembly, cell wall integrity during heat stress, and telomerase regulation; mobilizes membrane-anchored transcription factors by regulated Ub/prote…	15.4339	0.0214648	0.472598	0.742101	14.79	0.16	0.0001	0.00438983	PH
YDR427W	RPN9	4	1322205	1323386	W	proteasome regulatory particle lid subunit RPN9|NAS7	Non-ATPase regulatory subunit of the 26S proteasome; similar to putative proteasomal subunits in other species; null mutant is temperature sensitive and exhibits cell cycle and proteasome assembly defects; protein abundance increases in response to DNA replication stress; relocalizes to the cytosol in response to hypoxia	12.8656	0.0346973	0.261951	0.565251	14.426	0.16	0.001	0.0181119	PH
YKL080W	VMA5	11	285030	286208	W	H(+)-transporting V1 sector ATPase subunit C|VAT3|CSL5	Subunit C of the V1 peripheral membrane domain of V-ATPase; part of the electrogenic proton pump found throughout the endomembrane system; required for the V1 domain to assemble onto the vacuolar membrane; the V1 peripheral membrane domain of vacuolar H+-ATPase (V-ATPase) has eight subunits	13.8763	-0.0112226	0.694288	0.877218	14.853	0.16	0.001	0.0181119	PH
YLR401C	DUS3	12	922442	924448	C	tRNA dihydrouridine synthase DUS3	Dihydrouridine synthase; member of a widespread family of conserved proteins including Smm1p, Dus1p, and Dus4p; contains a consensus oleate response element (ORE) in its promoter region; forms nuclear foci upon DNA replication stress	12.5329	-0.0486208	0.139449	0.412457	13.861	0.16	0.003	0.047378	PH
YNL121C	TOM70	14	398684	400537	C	protein channel TOM70|OMP1|MOM72|MAS70	Component of the TOM (translocase of outer membrane) complex; involved in the recognition and initial import steps for all mitochondrially directed proteins; acts as a receptor for incoming precursor proteins; TOM70 has a paralog, TOM71, that arose from the whole genome duplication	13.9126	0.0348167	0.145129	0.419468	15.189	0.16	0.0001	0.00438983	PH
YNR043W	MVD1	14	701895	703085	W	diphosphomevalonate decarboxylase MVD1|ERG19	Mevalonate pyrophosphate decarboxylase; essential enzyme involved in the biosynthesis of isoprenoids and sterols, including ergosterol; acts as a homodimer	12.8428	-0.0477702	0.10166	0.346185	13.653	0.16	0.001	0.0181119	PH
YGR185C	TYS1	7	866336	867520	C	tyrosine--tRNA ligase TYS1|TyrRS|TTS1	Cytoplasmic tyrosyl-tRNA synthetase; required for cytoplasmic protein synthesis; interacts with positions 34 and 35 of the tRNATyr anticodon; mutations in human ortholog YARS are associated with Charcot-Marie-Tooth (CMT) neuropathies; human ortholog YARS functionally complements the heat sensitivity of a ts allele; protein abundance increases in response to DNA replication stress	14.308	0.0150452	0.659259	0.858962	14.698	0.17	0.00028	0.0098	PH
YCR053W	THR4	3	216697	218241	W	threonine synthase THR4	Threonine synthase; conserved protein that catalyzes formation of threonine from O-phosphohomoserine; expression is regulated by the GCN4-mediated general amino acid control pathway	14.6628	0.00586099	0.872191	0.95304	13.918	0.18	0.0001	0.00438983	PH
YER082C	UTP7	5	324272	325936	C	KRE31	Nucleolar protein; component of the small subunit (SSU) processome containing the U3 snoRNA that is involved in processing of pre-18S rRNA	13.1394	-0.0423106	0.235594	0.538461	13.633	0.18	0.00037	0.0122859	PH
YFR053C	HXK1	6	253592	255049	C	hexokinase 1	Hexokinase isoenzyme 1; a cytosolic protein that catalyzes phosphorylation of glucose during glucose metabolism; expression is highest during growth on non-glucose carbon sources; glucose-induced repression involves hexokinase Hxk2p; HXK1 has a paralog, HXK2, that arose from the whole genome duplication	12.8767	0.071779	0.270356	0.574144	14.343	0.18	0.0001	0.00438983	PH
YPL118W	MRP51	16	326628	327662	W	mitochondrial 37S ribosomal protein MRP51	Mitochondrial ribosomal protein of the small subunit; MRP51 exhibits genetic interactions with mutations in the COX2 and COX3 mRNA 5'-untranslated leader sequences	11.9206	0.00983754	0.773567	0.910777	13.444	0.18	0.00066	0.0181119	PH
YDR175C	RSM24	4	813193	814152	C	mitochondrial 37S ribosomal protein RSM24	Mitochondrial ribosomal protein of the small subunit	10.8391	-0.0538823	0.130869	0.397652	12.614	0.21	0.002	0.0329936	PH
YDR266C	HEL2	4	1000104	1002023	C	E3 ubiquitin-protein ligase HEL2	RING finger ubiquitin ligase (E3); involved in ubiquitination and degradation of excess histones; interacts with Ubc4p and Rad53p; null mutant sensitive to hydroxyurea (HU); green fluorescent protein (GFP)-fusion protein localizes to the cytoplasm; computational analysis suggests a role as a transcription factor	12.37	0.0152894	0.637708	0.847664	13.232	0.22	0.0001	0.00438983	PH
YER086W	ILV1	5	328477	330207	W	threonine ammonia-lyase ILV1|ISO1	Threonine deaminase, catalyzes first step in isoleucine biosynthesis; expression is under general amino acid control; ILV1 locus exhibits highly positioned nucleosomes whose organization is independent of known ILV1 regulation	14.3147	-0.0280058	0.283215	0.587161	14.163	0.23	0.0001	0.00438983	PH
YOL154W	ZPS1	15	34658	35407	W		Putative GPI-anchored protein; transcription is induced under low-zinc conditions, as mediated by the Zap1p transcription factor, and at alkaline pH	9.40681	-0.0828112	0.156081	0.433999	14.811	0.3	0.0007	0.0181119	PH
YDR070C	FMP16	4	588098	588379	C		Protein of unknown function; may be involved in responding to conditions of stress; the authentic, non-tagged protein is detected in highly purified mitochondria in high-throughput studies; protein abundance increases in response to DNA replication stress	5.99857	-0.315781	6.06801e-07	3.42367e-05	14.361	-0.92	0.008	0.088547	no
YJL082W	IML2	10	281185	283380	W		Protein required for clearance of inclusion bodies; localizes to the inclusion bodies formed under protein misfolding stress; the authentic, non-tagged protein is detected in highly purified mitochondria in high-throughput studies; protein abundance increases in response to DNA replication stress; IML2 has a paralog, YKR018C, that arose from the whole genome duplication	10.8726	0.109892	0.0329038	0.179742	11.395	-0.81	0.025	0.19503	no
YGR043C	NQM1	7	580435	581436	C	sedoheptulose-7-phosphate:D-glyceraldehyde-3-phosphate transaldolase NQM1	Transaldolase of unknown function; transcription is repressed by Mot1p and induced by alpha-factor and during diauxic shift; NQM1 has a paralog, TAL1, that arose from the whole genome duplication	8.47827	-0.325151	1.14705e-08	9.56706e-07	11.44	-0.8	0.008	0.088547	no
YHR094C	HXT1	8	290913	292625	C	hexose transporter HXT1|HOR4	Low-affinity glucose transporter of the major facilitator superfamily; expression is induced by Hxk2p in the presence of glucose and repressed by Rgt1p when glucose is limiting; HXT1 has a paralog, HXT6, what arose from the whole genome duplication	15.2339	0.0630055	0.143146	0.416865	10.765	-0.65	0.026	0.199231	no
YDR345C	HXT3	4	1162957	1164660	C	hexose transporter HXT3	Low affinity glucose transporter of the major facilitator superfamily; expression is induced in low or high glucose conditions; HXT3 has a paralog, HXT5, that arose from the whole genome duplication	15.9583	0.0282228	0.375086	0.673097	12.649	-0.56	0.26	0.635283	no
YLL032C	YLL032C	12	74270	76747	C		Protein of unknown function; may interact with ribosomes, based on co-purification experiments; green fluorescent protein (GFP)-fusion protein localizes to the cytoplasm; YLL032C is not an essential gene	10.9493	0.0288882	0.434665	0.718821	14.909	-0.56	0.19	0.560478	no
YGL008C	PMA1	7	479910	482666	C	H(+)-exporting P2-type ATPase PMA1|KTI10	Plasma membrane P2-type H+-ATPase; pumps protons out of cell; major regulator of cytoplasmic pH and plasma membrane potential; long-lived protein asymmetrically distributed at plasma membrane between mother cells and buds; accumulates at high levels in mother cells during aging, buds emerge with very low levels of Pma1p, newborn cells have low levels of Pma1p; Hsp30p plays a role in Pma1p regulat…	18.0735	-0.089378	0.0109553	0.0885505	13.642	-0.53	0.013	0.130504	no
YDL052C	SLC1	4	362672	363583	C	1-acylglycerol-3-phosphate O-acyltransferase SLC1	1-acyl-sn-glycerol-3-phosphate acyltransferase; catalyzes the acylation of lysophosphatidic acid to form phosphatidic acid, a key intermediate in lipid metabolism; enzymatic activity detected in lipid particles and microsomes	11.8217	0.0208496	0.647464	0.851693	14.92	-0.49	0.005	0.065736	no
YDR395W	SXM1	4	1263324	1266158	W	KAP108	Nuclear transport factor (karyopherin); involved in protein transport between the cytoplasm and nucleoplasm; similar to Nmd5p, Cse1p, Lph2p, and the human cellular apoptosis susceptibility protein, CAS1	13.4869	-0.0423325	0.116321	0.372734	12.501	-0.49	0.089	0.401585	no
YGR090W	UTP22	7	662358	666071	W	rRNA-processing protein UTP22	Component of the small-subunit processome; required for nuclear export of tRNAs; may facilitate binding of Utp8p to aminoacylated tRNAs and their delivery to Los1p for export; conserved from yeast to mammals	13.6409	-0.00124666	0.973785	0.991183	13.064	-0.46	0.0039	0.0578771	no
YJR143C	PMT4	10	698326	700614	C	dolichyl-phosphate-mannose-protein mannosyltransferase	Protein O-mannosyltransferase; transfers mannose residues from dolichyl phosphate-D-mannose to protein serine/threonine residues; appears to form homodimers in vivo and does not complex with other Pmt proteins; target for new antifungals	13.5637	-0.0333762	0.139382	0.412457	13.718	-0.46	0.029	0.215833	no
YPL232W	SSO1	16	107275	108147	W	syntaxin	Plasma membrane t-SNARE; involved in fusion of secretory vesicles at the plasma membrane and in vesicle fusion during sporulation; forms a complex with Sec9p that binds v-SNARE Snc2p; syntaxin homolog; functionally redundant with Sso2p; SSO1 has a paralog, SSO2, that arose from the whole genome duplication	12.2785	0.0213898	0.504126	0.763008	12.069	-0.41	0.042	0.260239	no
YOR153W	PDR5	15	619840	624375	W	ATP-binding cassette multidrug transporter PDR5|STS1|YDR1|LEM1	Plasma membrane ATP-binding cassette (ABC) transporter; multidrug transporter actively regulated by Pdr1p; also involved in steroid transport, cation resistance, and cellular detoxification during exponential growth; PDR5 has a paralog, PDR15, that arose from the whole genome duplication	14.8807	-0.035339	0.442456	0.723736	13.5	-0.38	0.016	0.150691	no
YAL023C	PMT2	1	106272	108551	C	dolichyl-phosphate-mannose-protein mannosyltransferase PMT2|FUN25	Protein O-mannosyltransferase of the ER membrane; transfers mannose residues from dolichyl phosphate-D-mannose to protein serine/threonine residues; involved in ER quality control; acts in a complex with Pmt1p, can instead interact with Pmt5p; antifungal drug target; PMT2 has a paralog, PMT3, that arose from the whole genome duplication	14.2998	-0.0514854	0.143324	0.416983	13.964	-0.37	0.025	0.19503	no
YNL132W	KRE33	14	375321	378491	W	ribosome biosynthesis protein KRE33|RRA1	Protein required for biogenesis of the small ribosomal subunit; heterozygous mutant shows haploinsufficiency in K1 killer toxin resistance; essential gene; NAT10, the human homolog, implicated in several types of cancer and premature aging.	13.4819	-0.057969	0.0827031	0.307465	13.712	-0.37	0.007	0.0827854	no
YKL065C	YET1	11	316437	317057	C		Endoplasmic reticulum transmembrane protein; may interact with ribosomes, based on co-purification experiments; homolog of human BAP31 protein; YET1 has a paralog, YET2, that arose from the whole genome duplication	12.2555	0.0867617	0.00727887	0.0664919	13.27	-0.36	0.15	0.507843	no
YNR031C	SSK2	14	680694	685433	C	mitogen-activated protein kinase kinase kinase SSK2	MAP kinase kinase kinase of HOG1 mitogen-activated signaling pathway; interacts with Ssk1p, leading to autophosphorylation and activation of Ssk2p which phosphorylates Pbs2p; also mediates actin cytoskeleton recovery from osmotic stress; a HOG-independent function of Ssk2p mediates the calcium-sensitive phenotype of the ptp2 msg5 double disruptant; SSK2 has a paralog, SSK22, that arose from the w…	11.8895	0.0246411	0.427822	0.714161	11.377	-0.36	0.02	0.171523	no
YMR307W	GAS1	13	887003	888682	W	1,3-beta-glucanosyltransferase GAS1|GGP1|CWH52	Beta-1,3-glucanosyltransferase; required for cell wall assembly and also has a role in transcriptional silencing; localizes to cell surface via a glycosylphosphatidylinositol (GPI) anchor; also found at nuclear periphery; genetic interactions with histone H3 lysine acetyltransferases GCN5 and SAS3 indicate previously unsuspected functions for Gas1 in DNA damage response and cell cycle regulation	16.395	-0.154645	4.43054e-11	6.53789e-09	14.822	-0.35	0.004	0.0578771	no
YPR183W	DPM1	16	900755	901558	W	dolichyl-phosphate beta-D-mannosyltransferase|SED3	Dolichol phosphate mannose (Dol-P-Man) synthase of ER membrane; catalyzes formation of Dol-P-Man from Dol-P and GDP-Man; required for biosynthesis of glycosyl phosphatidylinositol (GPI) membrane anchor, as well as O-mannosylation and protein N- and O-linked glycosylation; human homolog DPM1 can complement yeast mutant strains	12.503	-0.0739563	0.0627012	0.260538	13.4	-0.35	0.004	0.0578771	no
YCR017C	CWH43	3	144773	147634	C		GPI lipid remodelase; responsible for introducing ceramides into GPI anchors having a C26:0 fatty acid in sn-2 of the glycerol moiety; can also use lyso-GPI protein anchors and various base resistant lipids as substrates; contains 14-16 transmembrane segments and several putative glycosylation and phosphorylation sites; null mutation is synthetically lethal with pkc1 deletion	13.1795	0.00796064	0.755442	0.90226	12.726	-0.34	0.16	0.51995	no
YGL238W	CSE1	7	49552	52434	W	importin-alpha export receptor|KAP109	Nuclear envelope protein that acts as a recycling factor; mediates the nuclear export of Srp1p (importin alpha) back to the cytoplasm after its import substrates have been released into the nucleoplasm, thereby allowing the participation of Srp1p in multiple rounds of nuclear import; required for accurate chromosome segregation; homolog of metazoan CAS and human CSE1L, overexpression of which is …	13.4321	0.00576765	0.825703	0.932847	12.222	-0.34	0.005	0.065736	no
YPL024W	RMI1	16	503517	504242	W	NCE4	Subunit of the RecQ (Sgs1p) - Topo III (Top3p) complex; stimulates superhelical relaxing, DNA catenation/decatenation and ssDNA binding activities of Top3p; involved in response to DNA damage; functions in S phase-mediated cohesion establishment via a pathway involving the Ctf18-RFC complex and Mrc1p; stimulates Top3p DNA catenation/decatenation activity; null mutants display increased rates of r…	9.85742	-0.172912	6.6957e-05	0.00206063	11.43	-0.34	0.004	0.0578771	no
YDR508C	GNP1	4	1466453	1468444	C	glutamine permease GNP1	High-affinity glutamine permease; also transports Leu, Ser, Thr, Cys, Met and Asn; expression is fully dependent on Grr1p and modulated by the Ssy1p-Ptr3p-Ssy5p (SPS) sensor of extracellular amino acids; GNP1 has a paralog, AGP1, that arose from the whole genome duplication	14.3376	-0.0438945	0.133172	0.402735	12.006	-0.33	0.004	0.0578771	no
YGL022W	STT3	7	452404	454560	W	dolichyl-diphosphooligosaccharide--protein glycosyltransferase subunit STT3	Subunit of the oligosaccharyltransferase complex of the ER lumen; complex catalyzes asparagine-linked glycosylation of newly synthesized proteins; forms a subcomplex with Ost3p and Ost4p and is directly involved in catalysis	13.8591	-0.0406714	0.240522	0.543465	13.443	-0.33	0.11	0.438983	no
YJR046W	TAH11	10	522048	523862	W	CDT1|SID2	DNA replication licensing factor; required for pre-replication complex assembly	11.3997	0.00975381	0.802187	0.92129	11.562	-0.33	0.1	0.415064	no
YLR342W	FKS1	12	809997	815627	W	1,3-beta-D-glucan synthase|PBR1|GSC1|ETG1|CWH53|CND1	Catalytic subunit of 1,3-beta-D-glucan synthase; functionally redundant with alternate catalytic subunit Gsc2p; binds to regulatory subunit Rho1p; involved in cell wall synthesis and maintenance; localizes to sites of cell wall remodeling; FKS1 has a paralog, GSC2, that arose from the whole genome duplication	15.4804	-0.069649	0.0984909	0.340021	13.456	-0.33	0.032	0.22895	no
YGR198W	YPP1	7	894693	897146	W		Cargo-transport protein involved in endocytosis; interacts with phosphatidylinositol-4-kinase Stt4p; is required, along with Efr3p, for the assembly and recruitment of multiple copies of the kinase into phosphoinositide kinase (PIK) patches at the plasma membrane; positively regulates Stt4p; GFP-fusion protein localizes to the cytoplasm; YGR198W is an essential gene	12.3081	0.021241	0.505505	0.764218	12.332	-0.32	0.038	0.245436	no
YBR054W	YRO2	2	343101	344135	W		Protein with a putative role in response to acid stress; null mutant is sensitive to acetic acid; transcription is regulated by Haa1p and induced in the presence of acetic acid; protein observed in plasma membrane foci in the presence of acetic acid; the authentic, non-tagged protein is detected in a phosphorylated state in highly purified mitochondria in high-throughput studies	12.491	-0.0930805	0.136596	0.408581	12.719	-0.31	0.17	0.530482	no
YDL095W	PMT1	4	287059	289512	W	dolichyl-phosphate-mannose-protein mannosyltransferase PMT1	Protein O-mannosyltransferase of the ER membrane; transfers mannose from dolichyl phosphate-D-mannose to protein serine and threonine residues; 1 of 7 related proteins involved in O-glycosylation which is essential for cell wall rigidity; involved in ER quality control; amino terminus faces cytoplasm, carboxyl terminus faces ER lumen	14.2831	-0.0588634	0.0502165	0.230322	12.89	-0.31	0.033	0.229758	no
YMR259C	TRM732	13	784621	788883	C	tRNA methylation protein TRM732	Protein involved in 2'-O-methylation of C32 of substrate tRNAs; interacts with 2'-O-ribose methyltransferase Trm7p; green fluorescent protein (GFP)-fusion protein localizes to the cytoplasm; non-essential gene; yeast null mutant can be functionally complemented by human THADA, mutations in which have been implicated in epithelial thyroid adenomas, type 2 diabetes, and polycystic ovary syndrome (P…	12.6074	0.00432805	0.887945	0.958058	12.43	-0.31	0.16	0.51995	no
YDL212W	SHR3	4	78426	79058	W	APF1	Endoplasmic reticulum packaging chaperone; required for incorporation of amino acid permeases into COPII coated vesicles for transport to the cell surface	12.7275	-0.0220078	0.555532	0.795363	14.235	-0.3	0.096	0.413023	no
YGR284C	ERV29	7	1060658	1061590	C		Protein localized to COPII-coated vesicles; involved in vesicle formation and incorporation of specific secretory cargo; protein abundance increases in response to DNA replication stress	12.6439	-0.0545889	0.125854	0.38901	12.359	-0.3	0.22	0.594161	no
YMR308C	PSE1	13	888952	892221	C	KAP121	Karyopherin/importin that interacts with the nuclear pore complex; acts as the nuclear import receptor for specific proteins, including Pdr1p, Yap1p, Ste12p, and Aft1p	14.2384	0.0183669	0.562647	0.79967	13.522	-0.3	0.006	0.0736493	no
YDL072C	YET3	4	329836	330447	C		Protein of unknown function; YET3 null mutant decreases the level of secreted invertase; homolog of human BAP31 protein; protein abundance increases in response to DNA replication stress	11.955	0.0350138	0.296238	0.60258	13.943	-0.29	0.15	0.507843	no
YHR077C	NMD2	8	252374	255756	C	SUP111|UPF2|SUA1|IFS1	Protein involved in the nonsense-mediated mRNA decay (NMD) pathway; interacts with Nam7p and Upf3p; involved in telomere maintenance	13.0397	0.0174675	0.477668	0.746397	12.552	-0.29	0.074	0.359587	no
YKR018C	YKR018C	11	473723	475900	C		Protein of unknown function; green fluorescent protein (GFP)-fusion protein localizes to the cytoplasm and nucleus; protein abundance increases in response to DNA replication stress; YKR018C has a paralog, IML2, that arose from the whole genome duplication	13.0559	-0.00547967	0.842839	0.939481	13.117	-0.29	0.006	0.0736493	no
YLR450W	HMG2	12	1032627	1035764	W	hydroxymethylglutaryl-CoA reductase (NADPH) HMG2	HMG-CoA reductase; converts HMG-CoA to mevalonate, a rate-limiting step in sterol biosynthesis; one of two isozymes; overproduction induces assembly of peripheral ER membrane arrays and short nuclear-associated membrane stacks; forms foci at nuclear periphery upon DNA replication stress; HMG2 has a paralog, HMG1, that arose from the whole genome duplication; human homolog HMGCR can complement yea…	12.1581	0.00489775	0.878796	0.955501	12.693	-0.29	0.25	0.628031	no
YML048W	GSF2	13	178426	179637	W	ECM6	Endoplasmic reticulum (ER) localized integral membrane protein; may promote secretion of certain hexose transporters, including Gal2p; involved in glucose-dependent repression	13.1464	0.0571049	0.0205726	0.135464	12.745	-0.29	0.068	0.341318	no
YPL012W	RRP12	16	529723	533409	W	mRNA-binding protein RRP12	Protein required for export of the ribosomal subunits; associates with the RNA components of the pre-ribosomes; has a role in nuclear import in association with Pse1p; also plays a role in the cell cycle and the DNA damage response; contains HEAT-repeats	14.3118	0.019583	0.534424	0.779519	11.567	-0.29	0.018	0.159658	no
YBR029C	CDS1	2	296369	297742	C	phosphatidate cytidylyltransferase|CDG1	Phosphatidate cytidylyltransferase (CDP-diglyceride synthetase); an enzyme that catalyzes that conversion of CTP + phosphate into diphosphate + CDP-diaclglyerol, a critical step in the synthesis of all major yeast phospholipids; human homolog CDS1 can complement yeast cds1 null mutant	13.0521	0.00582929	0.817067	0.929944	13.502	-0.28	0.46	0.790577	no
YDL112W	TRM3	4	258915	263225	W	tRNA (guanosine(18)-2'-O)-methyltransferase	2'-O-ribose methyltransferase; catalyzes the ribose methylation of the guanosine nucleotide at position 18 of tRNAs	13.1677	0.0238941	0.435249	0.719167	11.763	-0.28	0.17	0.530482	no
YEL036C	ANP1	5	83050	84552	C	MNN8|GEM3	Subunit of the alpha-1,6 mannosyltransferase complex; type II membrane protein; has a role in retention of glycosyltransferases in the Golgi; involved in osmotic sensitivity and resistance to aminonitrophenyl propanediol	12.5403	-0.0502601	0.0863728	0.316067	11.728	-0.28	0.018	0.159658	no
YEL055C	POL5	5	48471	51539	C	DNA-directed DNA polymerase	DNA Polymerase phi; has sequence similarity to the human MybBP1A and weak sequence similarity to B-type DNA polymerases, not required for chromosomal DNA replication; required for the synthesis of rRNA	13.4799	0.0288787	0.330473	0.637632	12.499	-0.28	0.024	0.190675	no
YGR060W	ERG25	7	610564	611493	W	methylsterol monooxygenase	C-4 methyl sterol oxidase; catalyzes the first of three steps required to remove two C-4 methyl groups from an intermediate in ergosterol biosynthesis; mutants accumulate the sterol intermediate 4,4-dimethylzymosterol; human MSMO1 functionally complements the growth defect caused by repression of ERG25 expression	14.1363	-0.0715154	0.0381773	0.198474	13.205	-0.28	0.34	0.701673	no
YMR015C	ERG5	13	300869	302485	C	C-22 sterol desaturase|CYP61	C-22 sterol desaturase; a cytochrome P450 enzyme that catalyzes the formation of the C-22(23) double bond in the sterol side chain in ergosterol biosynthesis; may be a target of azole antifungal drugs	13.0707	0.0503705	0.199016	0.498752	12.393	-0.28	0.14	0.488679	no
YMR296C	LCB1	13	859215	860891	C	serine C-palmitoyltransferase LCB1|TSC2|END8	Component of serine palmitoyltransferase; responsible along with Lcb2p for the first committed step in sphingolipid synthesis, which is the condensation of serine with palmitoyl-CoA to form 3-ketosphinganine	12.9871	-0.0317291	0.342866	0.648525	11.913	-0.28	0.17	0.530482	no
YGR261C	APL6	7	1014321	1016750	C	YKS5	Beta3-like subunit of the yeast AP-3 complex; functions in transport of alkaline phosphatase to the vacuole via the alternate pathway; exists in both cytosolic and peripherally associated membrane-bound pools	12.7191	0.0261899	0.343168	0.648568	14.085	-0.27	0.098	0.415064	no
YBL017C	PEP1	2	186844	191583	C	type I sorting receptor|VPT1|VPS10	Type I transmembrane sorting receptor for multiple vacuolar hydrolases; cycles between the late-Golgi and prevacuolar endosome-like compartments	13.306	0.00282539	0.93454	0.977158	13.36	-0.26	0.023	0.184427	no
YCR042C	TAF2	3	201174	205397	C	TafII150|TSM1|TAF150	TFIID subunit (150 kDa); involved in RNA polymerase II transcription initiation	12.3925	0.0618217	0.0326955	0.179238	13.847	-0.26	0.1	0.415064	no
YGL233W	SEC15	7	59122	61854	W	Rab GTPase-binding exocyst subunit SEC15	Essential 113 kDa subunit of the exocyst complex; the exocyst mediates polarized targeting and tethering of post-Golgi secretory vesicles to active sites of exocytosis prior to SNARE-mediated fusion; interacts with and functions as a downstream effector of active, GTP-bound Sec4p, a Rab family GTPase	11.9266	0.0572396	0.123652	0.385898	12.408	-0.26	0.047	0.278558	no
YKL010C	UFD4	11	421424	425875	C	putative ubiquitin-protein ligase UFD4	Ubiquitin-protein ligase (E3); interacts with Rpt4p and Rpt6p, two subunits of the 19S particle of the 26S proteasome; cytoplasmic E3 involved in the degradation of ubiquitin fusion proteins; relative distribution to the nucleus increases upon DNA replication stress	12.198	0.0333825	0.384391	0.679413	10.011	-0.26	0.3	0.669251	no
YOR270C	VPH1	15	828052	830574	C	H(+)-transporting V0 sector ATPase subunit a	Subunit a of vacuolar-ATPase V0 domain; one of two isoforms (Vph1p and Stv1p); Vph1p is located in V-ATPase complexes of the vacuole while Stv1p is located in V-ATPase complexes of the Golgi and endosomes; relative distribution to the vacuolar membrane decreases upon DNA replication stress; human homolog ATP6V0A4 implicated in renal tubular acidosis, can complement yeast null mutant	14.9472	-0.0543593	0.0809204	0.303781	12.29	-0.26	0.0045	0.06475	no
YPR149W	NCE102	16	829918	830439	W	NCE2	Protein of unknown function; contains transmembrane domains; involved in secretion of proteins that lack classical secretory signal sequences; component of the detergent-insoluble glycolipid-enriched complexes (DIGs); NCE102 has a paralog, FHN1, that arose from the whole genome duplication	13.9312	0.00108276	0.97614	0.992173	12.066	-0.26	0.067	0.338926	no
YDR211W	GCD6	4	884727	886865	W	translation initiation factor eIF2B catalytic subunit epsilon	Catalytic epsilon subunit of the translation initiation factor eIF2B; eIF2B is the guanine-nucleotide exchange factor for eIF2; activity subsequently regulated by phosphorylated eIF2; first identified as a negative regulator of GCN4 expression; forms cytoplasmic foci upon DNA replication stress	13.5749	-0.0664466	0.0232312	0.146203	13.334	-0.25	0.038	0.245436	no
YER141W	COX15	5	453459	454919	W		Protein required for the hydroxylation of heme O to form heme A; heme A is an essential prosthetic group for cytochrome c oxidase	11.649	0.0142333	0.704549	0.881644	11.595	-0.25	0.36	0.720556	no
YHR098C	SFB3	8	299145	301934	C	LST1	Component of the Sec23p-Sfb3p heterodimer of the COPII vesicle coat; COPII coat is required for cargo selection during vesicle formation in ER to Golgi transport; scaffolding function of Lst1p required to generate vesicles that can accommodate difficult cargo proteins that include large oligomeric assemblies and asymmetrically distributed membrane proteins; homologous to Sec24p and Sfb2p	13.0627	0.00308543	0.920834	0.973617	12.269	-0.25	0.23	0.607238	no
YHR190W	ERG9	8	484845	486179	W	bifunctional farnesyl-diphosphate farnesyltransferase/squalene synthase	Farnesyl-diphosphate farnesyl transferase (squalene synthase); joins two farnesyl pyrophosphate moieties to form squalene in the sterol biosynthesis pathway	13.4124	-0.00841024	0.761674	0.904499	14.439	-0.25	0.011	0.113056	no
YMR196W	YMR196W	13	655076	658342	W		Putative protein of unknown function; green fluorescent protein (GFP)-fusion protein localizes to the cytoplasm; YMR196W is not an essential gene	11.2855	-0.148924	0.00707434	0.0650933	12.546	-0.25	0.015	0.144963	no
YOR304W	ISW2	15	884514	887876	W	DNA translocase	ATP-dependent DNA translocase involved in chromatin remodeling; ATPase component that, with Itc1p, forms a complex required for repression of a-specific genes, INO1, and early meiotic genes during mitotic growth; the Isw2 complex exhibits basal levels of chromatin binding throughout the genome as well as target-specific chromatin interactions; targeted by Ume6p- and Sua7p-dependent DNA looping to…	12.2511	0.0725687	0.0451613	0.218018	11.182	-0.25	0.049	0.287127	no
YBL079W	NUP170	2	75259	79767	W	NLE3	Subunit of inner ring of nuclear pore complex (NPC); contributes to NPC assembly and nucleocytoplasmic transport; interacts with genomic regions that contain ribosomal protein and subtelomeric genes, where it functions in nucleosome positioning and as a repressor of transcription; both Nup170p and NUP157p are similar to human Nup155p; NUP170 has a paralog, NUP157, that arose from the whole genome…	13.1808	-0.0137635	0.730342	0.894379	13.643	-0.24	0.26	0.635283	no
YBR218C	PYC2	2	658707	662249	C	pyruvate carboxylase 2	Pyruvate carboxylase isoform; cytoplasmic enzyme that converts pyruvate to oxaloacetate; differentially regulated than isoform Pyc1p; mutations in the human homolog are associated with lactic acidosis; PYC2 has a paralog, PYC1, that arose from the whole genome duplication	13.7785	0.0293878	0.449063	0.726759	14.629	-0.24	0.008	0.088547	no
YDL110C	TMA17	4	264512	264964	C	ADC17	ATPase dedicated chaperone that adapts proteasome assembly to stress; Tma17p is induced upon stress; interacts with Rpt6p to assist its pairing to Rpt3p and early steps in proteasome biogenesis; associates with ribosomes; heterozygous deletion demonstrated increases in chromosome instability in a rad9 deletion background; protein abundance is decreased upon intracellular iron depletion	10.0959	-0.155488	0.00151194	0.0208662	13.593	-0.24	0.006	0.0736493	no
YDL190C	UFD2	4	118707	121592	C	ubiquitin-ubiquitin ligase UFD2	Ubiquitin chain assembly factor (E4); cooperates with a ubiquitin-activating enzyme (E1), a ubiquitin-conjugating enzyme (E2), and a ubiquitin protein ligase (E3) to conjugate ubiquitin to substrates; also functions as an E3	12.4114	-0.0131629	0.665866	0.863361	12.626	-0.24	0.29	0.662346	no
YDR164C	SEC1	4	782041	784215	C		Sm-like protein involved in docking and fusion of exocytic vesicles; binds to assembled SNARE complexes at the membrane and stimulates membrane fusion; localization to sites of secretion (bud neck and bud tip) is dependent on SNARE function; interacts directly with essential exocyst subunit Sec6p	11.6344	0.0340725	0.40055	0.69159	11.246	-0.24	0.17	0.530482	no
YFR002W	NIC96	6	150016	152535	W	linker nucleoporin NIC96	Linker nucleoporin component of the nuclear pore complex (NPC); also part of the NPC nuclear basket; contributes to nucleocytoplasmic transport and NPC biogenesis; forms stable associations with three FG-nucleoporins (Nsp1p, Nup57p, and Nup49p)	12.889	0.0163308	0.509521	0.766313	13.288	-0.24	0.28	0.649821	no
YML125C	PGA3	13	20761	21699	C	cytochrome-b5 reductase|NQR1	Putative cytochrome b5 reductase, localized to the plasma membrane; may be involved in regulation of lifespan; required for maturation of Gas1p and Pho8p, proposed to be involved in protein trafficking; PGA3 has a paralog, AIM33, that arose from the whole genome duplication	13.1754	-0.0645626	0.0898584	0.322202	12.788	-0.24	0.15	0.507843	no
YMR302C	YME2	13	870073	872625	C	PRP12|RNA12	Integral inner mitochondrial membrane protein; role in maintaining mitochondrial nucleoid structure and number; mutants exhibit an increased rate of mitochondrial DNA escape; shows some sequence similarity to exonucleases	11.9057	0.00634948	0.854667	0.943709	12.266	-0.24	0.037	0.243223	no
YNL180C	RHO5	14	299654	300649	C	Rho family GTPase RHO5|YNS0	Non-essential small GTPase of the Rho/Rac family of Ras-like proteins; RAC1 ortholog; regulated by phosphorylation and ubiquitination; likely involved in protein kinase C (Pkc1p)-dependent signal transduction pathway that controls cell integrity	12.2024	-0.0852766	0.01427	0.106793	13.52	-0.24	0.0001	0.00438983	no
YNL313C	EMW1	14	45308	48022	C	tetratricopeptide repeat-containing protein EMW1	Essential conserved protein with a role in cell wall integrity; contains six TPR (tetratricopeptide repeat) domains clustered in the C-terminal region; conditional mutant is suppressed by overexpression of GFA1; protein abundance increases in response to DNA replication stress	13.0278	-0.0366436	0.335708	0.641435	13.751	-0.24	0.26	0.635283	no
YBR069C	TAT1	2	376574	378433	C	amino acid transporter TAT1|VAP1|TAP1	Amino acid transporter for valine, leucine, isoleucine, and tyrosine; low-affinity tryptophan and histidine transporter; overexpression confers FK506 and FTY720 resistance; protein abundance increases in response to DNA replication stress	14.043	-0.0368625	0.19728	0.495569	11.328	-0.23	0.28	0.649821	no
YDR093W	DNF2	4	631282	636120	W	aminophospholipid-translocating P4-type ATPase DNF2	Aminophospholipid translocase (flippase); type 4 P-type ATPase; involved in phospholipid translocation, contributing to endocytosis, protein transport, and cellular polarization; localizes primarily to the plasma membrane; localizes to the shmoo tip where it has a redundant role in the cellular response to mating pheromone; DNF2 has a paralog, DNF1, that arose from the whole genome duplication	12.5254	0.0241591	0.606613	0.826678	12.219	-0.23	0.065	0.333366	no
YDR303C	RSC3	4	1068729	1071386	C		Component of the RSC chromatin remodeling complex; essential gene required for maintenance of proper ploidy and regulation of ribosomal protein genes and the cell wall/stress response; RSC3 has a paralog, RSC30, that arose from the whole genome duplication	11.9696	0.0073205	0.829297	0.934551	12.422	-0.23	0.12	0.456388	no
YER021W	RPN3	5	196948	198519	W	proteasome regulatory particle lid subunit RPN3|SUN2	Essential non-ATPase regulatory subunit of the 26S proteasome lid; similar to the p58 subunit of the human 26S proteasome; temperature-sensitive alleles cause metaphase arrest, suggesting a role for the proteasome in cell cycle control	13.7905	-0.00385697	0.858408	0.945843	13.589	-0.23	0.056	0.306638	no
YER166W	DNF1	5	512744	517459	W	aminophospholipid-translocating P4-type ATPase DNF1	Aminophospholipid translocase (flippase); type 4 P-type ATPase; involved in phospholipid translocation, contributing to endocytosis, protein transport, and cellular polarization; localizes primarily to the plasma membrane; localizes to the shmoo tip where it has a redundant role in the cellular response to mating pheromone; DNF1 has a paralog, DNF2, that arose from the whole genome duplication	12.9426	0.00980577	0.828416	0.934551	11.806	-0.23	0.092	0.406621	no
YGR157W	CHO2	7	802440	805049	W	phosphatidylethanolamine N-methyltransferase|PEM1	Phosphatidylethanolamine methyltransferase (PEMT); catalyzes the first step in the conversion of phosphatidylethanolamine to phosphatidylcholine during the methylation pathway of phosphatidylcholine biosynthesis	14.1084	0.0391664	0.246074	0.548473	12.892	-0.23	0.017	0.153951	no
YIL126W	STH1	9	117992	122071	W	RSC chromatin remodeling complex ATPase subunit STH1|NPS1	ATPase component of the RSC chromatin remodeling complex; required for expression of early meiotic genes; promotes base excision repair in chromatin; essential helicase-related protein homologous to Snf2p	13.2748	0.0647192	0.0462892	0.221258	13.743	-0.23	0.084	0.3885	no
YOL090W	MSH2	15	147382	150276	W	mismatch repair ATPase MSH2|PMS5	Protein that binds to DNA mismatches; forms heterodimers with Msh3p and Msh6p that bind to DNA mismatches to initiate the mismatch repair process; contains a Walker ATP-binding motif required for repair activity and involved in interstrand cross-link repair; Msh2p-Msh6p binds to and hydrolyzes ATP	12.1168	0.00397023	0.902984	0.964839	12.685	-0.23	0.064	0.330858	no
YOR254C	SEC63	15	805032	807023	C	protein-transporting protein SEC63|PTL1	Essential subunit of Sec63 complex; with Sec61 complex, Kar2p/BiP and Lhs1p forms a channel competent for SRP-dependent and post-translational SRP-independent protein targeting and import into the ER; other members are Sec62p, Sec66p, and Sec72p	13.8339	0.0199697	0.419182	0.706411	13.383	-0.23	0.021	0.174887	no
YPL009C	RQC2	16	535820	538936	C	TAE2	Component of RQC, which mediates nascent chain degradation; RQC (ribosome quality control complex) is a ribosome-bound complex required for degradation of polypeptides arising from stalled translation; recruits alanine- and threonine-charged tRNA to the A site and directs the elongation of nascent chains independently of mRNA or 40S subunits; monitors translation stress and signals this to Hsf1p	13.0536	0.060033	0.16115	0.442048	12.267	-0.23	0.026	0.199231	no
YPL135W	ISU1	16	297553	298050	W	iron-binding protein ISU1|NUA1	Conserved protein of the mitochondrial matrix; performs a scaffolding function during assembly of iron-sulfur clusters, interacts physically and functionally with yeast frataxin (Yfh1p); ISU1 has a paralog, ISU2, that arose from the whole genome duplication; isu1 isu2 double mutant is inviable; human homolog ISCU implicated in mitochondrial myopathy, can complement isu1 isu2 double mutant	11.6249	-0.0459039	0.185015	0.477158	14.584	-0.23	0.037	0.243223	no
YBR283C	SSH1	2	768943	770415	C		Subunit of the Ssh1 translocon complex; Sec61p homolog involved in co-translational pathway of protein translocation; not essential	13.9398	0.0148941	0.560732	0.798692	13.202	-0.22	0.14	0.488679	no
YDL193W	NUS1	4	114672	115799	W	ditrans,polycis-polyprenyl diphosphate synthase	Forms dehydrodolichyl diphosphate syntase complex with RER2 or SRT1; tet-repressible mutant shows accumulation of hypoglycosylated forms of CPY, suggesting that Nus1p may be involved in protein trafficking; mutations in human homolog NUS1 have been implicated in congenital scoliosis, neurological impairment, refractory epilepsy, hearing deficit, and visual impairment; human cis-prenyltransferase …	11.2965	0.0167755	0.664838	0.862715	12.388	-0.22	0.34	0.701673	no
YDR031W	MIX14	4	503498	503863	W	MIC14	Mitochondrial intermembrane space protein of unknown function; required for normal oxygen consumption; contains twin cysteine-x9-cysteine motifs; protein abundance increases in response to DNA replication stress	8.4739	-0.124875	0.0306977	0.171737	13.512	-0.22	0.043	0.262665	no
YDR186C	SND1	4	832859	835492	C		Protein involved in SRP-independent targeting of substrates to the ER; component of an alternative ER targeting pathway that has partial functional redundancy with the GET pathway; preference for substrates with downstream transmembrane domains; interacts with Env10p/Snd2p and Pho88p/Snd3p; can compensate for loss of SRP; may interact with ribosomes, based on co-purification experiments; GFP-fusi…	12.7671	0.056472	0.0604884	0.2554	10.965	-0.22	0.22	0.594161	no
YGR266W	YGR266W	7	1022656	1024761	W		Protein of unknown function; predicted to contain a single transmembrane domain; mutant has increased aneuploidy tolerance; localized to both the mitochondrial outer membrane and the plasma membrane; protein abundance increases in response to DNA replication stress	11.4244	-0.0462295	0.149189	0.425194	11.474	-0.22	0.072	0.3552	no
YNL036W	NCE103	14	559814	560479	W	carbonate dehydratase NCE103|NCE3	Carbonic anhydrase; metalloenzyme that catalyzes CO2 hydration to bicarbonate, which is an important metabolic substrate, and protons; not expressed under conditions of high CO2, such as inside a growing colony, but transcription is induced in response to low CO2 levels, such as on the colony surface in ambient air; poorly transcribed under aerobic conditions and at an undetectable level under an…	11.5713	-0.0404704	0.486257	0.751453	13.164	-0.22	0.073	0.356736	no
YBR037C	SCO1	2	310565	311452	C	Cu-binding protein SCO1|PET161	Copper-binding protein of mitochondrial inner membrane; required for cytochrome c oxidase activity and respiration; may function to deliver copper to cytochrome c oxidase; similar to thioredoxins; SCO1 has a paralog, SCO2, that arose from the whole genome duplication	9.54401	-0.0611893	0.213746	0.513187	12.012	-0.21	0.023	0.184427	no
YCL045C	EMC1	3	44623	46905	C		Member of conserved endoplasmic reticulum membrane complex; involved in efficient folding of proteins in the ER; null mutant displays induction of the unfolded protein response; interacts with Gal80p; homologous to worm H17B01.4/EMC-1, fly CG2943, and human KIAA0090	13.5868	0.0208299	0.593326	0.819043	13.594	-0.21	0.045	0.271047	no
YCR093W	CDC39	3	280117	286443	W	CCR4-NOT core subunit CDC39|SMD6|ROS1|NOT1	Subunit of the CCR4-NOT1 core complex; this complex has multiple roles in the regulation of mRNA levels including regulation of transcription and destabilization of mRNA by deadenylation; basal transcription factor that increases initiation and elongation; activates the ATPase activity of Dhh1p, resulting in processing body disassembly	13.1254	0.0966916	0.0413134	0.208195	11.27	-0.21	0.66	0.885699	no
YDR309C	GIC2	4	1079048	1080199	C		Redundant rho-like GTPase Cdc42p effector; involved in initiation of budding and cellular polarization; interacts with Cdc42p via the Cdc42/Rac-interactive binding (CRIB) domain and with PI(4,5)P2 via a polybasic region; GIC2 has a paralog, GIC1, that arose from the whole genome duplication	12.2948	-0.0284569	0.457435	0.732278	11.216	-0.21	0.019	0.165134	no
YDR483W	KRE2	4	1421157	1422485	W	alpha-1,2-mannosyltransferase KRE2|MNT1	Alpha1,2-mannosyltransferase of the Golgi; involved in protein mannosylation; KRE2 has a paralog, KTR6, that arose from the whole genome duplication	13.7719	-0.012416	0.563802	0.800365	16.066	-0.21	0.066	0.336496	no
YHR007C	ERG11	8	120091	121683	C	sterol 14-demethylase|CYP51	Lanosterol 14-alpha-demethylase; catalyzes C-14 demethylation of lanosterol to form 4,4''-dimethyl cholesta-8,14,24-triene-3-beta-ol in ergosterol biosynthesis pathway; transcriptionally down-regulated when ergosterol is in excess; member of cytochrome P450 family; associated and coordinately regulated with the P450 reductase Ncp1p; human CYP51A1 functionally complements the lethality of the erg1…	14.9751	-0.0886284	0.0156027	0.113874	13.556	-0.21	0.06	0.315213	no
YHR106W	TRR2	8	325598	326626	W	thioredoxin-disulfide reductase TRR2	Mitochondrial thioredoxin reductase; involved in protection against oxidative stress, required with Glr1p to maintain the redox state of Trx3p; contains active-site motif (CAVC) present in prokaryotic orthologs; binds NADPH and FAD; TRR2 has a paralog, TRR1, that arose from the whole genome duplication	10.3001	-0.217128	1.96497e-08	1.59274e-06	13.086	-0.21	0.03	0.220739	no
YIL031W	ULP2	9	292633	295737	W	SUMO protease ULP2|SMT4	Peptidase that deconjugates Smt3/SUMO-1 peptides from proteins; plays a role in chromosome cohesion at centromeric regions and recovery from checkpoint arrest induced by DNA damage or DNA replication defects; potential Cdc28p substrate; human homolog PML implicated in promyelocytic leukemia can partially complement yeast null mutant	11.1236	0.0709664	0.103059	0.349455	15.671	-0.21	0.19	0.560478	no
YML031W	NDC1	13	214189	216156	W		Subunit of the transmembrane ring of the nuclear pore complex (NPC); contributes to nucleocytoplasmic transport, NPC biogenesis and spindle pole body duplication; homologous to human NDC1	12.5767	-0.00574064	0.86415	0.949625	12.099	-0.21	0.22	0.594161	no
YML061C	PIF1	13	148953	151532	C	DNA helicase PIF1|TST1	DNA helicase, potent G-quadruplex DNA binder/unwinder; possesses strand annealing activity; promotes DNA synthesis during break-induced replication; important for crossover recombination; translation from different start sites produces mitochondrial and nuclear forms; nuclear form is a catalytic inhibitor of telomerase; mitochondrial form involved in DNA repair and recombination; mutations affect…	11.7494	-0.0216078	0.494498	0.757566	11.12	-0.21	0.09	0.404687	no
YPL032C	SVL3	16	488887	491364	C		Protein of unknown function; mutant phenotype suggests a potential role in vacuolar function; green fluorescent protein (GFP)-fusion protein localizes to the cell periphery, cytoplasm, bud, and bud neck; relocalizes from bud neck to cytoplasm upon DNA replication stress; SVL3 has a paralog, PAM1, that arose from the whole genome duplication	12.6889	-0.0113745	0.813725	0.928606	13.155	-0.21	0.005	0.065736	no
YBR074W	PFF1	2	386286	389216	W	YBR075W	Multi-spanning vacuolar membrane protease; glycosylated transmembrane protein bearing homology to the M28 family of metalloproteases; has a lumenal-facing protease domain; proposed role in vacuole physiology	12.4881	-0.0110861	0.669274	0.86512	13.847	-0.2	0.48	0.8	no
YDR074W	TPS2	4	593893	596583	W	trehalose-phosphatase TPS2|PFK3|HOG2	Phosphatase subunit of the trehalose-6-P synthase/phosphatase complex; involved in synthesis of the storage carbohydrate trehalose; expression is induced by stress conditions and repressed by the Ras-cAMP pathway; protein abundance increases in response to DNA replication stress	12.0732	0.115196	0.0381565	0.198474	12.82	-0.2	0.27	0.64333	no
YDR181C	SAS4	4	825910	827355	C		Subunit of the SAS complex (Sas2p, Sas4p, Sas5p); acetylates free histones and nucleosomes and regulates transcriptional silencing; required for the HAT activity of Sas2p	10.6792	0.0128559	0.725647	0.891757	12.616	-0.2	0.059	0.313135	no
YEL031W	SPF1	5	90258	93905	W	ion-transporting P-type ATPase SPF1|PER9|PIO1|COD1	P-type ATPase, ion transporter of the ER membrane; required to maintain normal lipid composition of intracellular compartments and proper targeting of mitochondrial outer membrane tail-anchored proteins; involved in ER function and Ca2+ homeostasis; required for regulating Hmg2p degradation; confers sensitivity to a killer toxin (SMKT) produced by Pichia farinosa KK1	14.1899	0.00360652	0.923876	0.973678	14.109	-0.2	0.005	0.065736	no
YGR047C	TFC4	7	586392	589469	C	transcription factor TFIIIC subunit TFC4|tau 131|PCF1	Subunit of RNA polymerase III transcription initiation factor complex; one of six subunits of RNA polymerase III transcription initiation factor complex (TFIIIC); part of the TauA domain of TFIIIC that binds BoxA DNA promoter sites of tRNA and similar genes; has TPR motifs; human homolog is TFIIIC-102	11.6495	0.0462157	0.122524	0.383429	11.815	-0.2	0.34	0.701673	no
YHR039C	MSC7	8	184875	186809	C	meiotic recombination directing protein	Protein of unknown function; green fluorescent protein (GFP)-fusion protein localizes to the endoplasmic reticulum; msc7 mutants are defective in directing meiotic recombination events to homologous chromatids	13.0657	-0.00355647	0.917607	0.972708	12.558	-0.2	0.14	0.488679	no
YIL039W	TED1	9	278426	279847	W		GPI-glycan remodelase; conserved phosphoesterase domain-containing protein; acts together with Emp24p/Erv25p in cargo exit from the ER; functional ortholog of mammalian GPI-glycan remodelase PGAP5; deletion confers sensitivity to 4-(N-(S-glutathionylacetyl)amino) phenylarsenoxide (GSAO)	12.7843	-0.0202278	0.44651	0.724802	13.32	-0.2	0.016	0.150691	no
YIL136W	OM45	9	93619	94800	W		Mitochondrial outer membrane protein of unknown function; major constituent of the outer membrane, extending into the intermembrane space; interacts with porin (Por1p) and with Om14p; imported via the presequence pathway involving the TOM and TIM23 complexes, then assembled in the outer membrane by Mim1p; protein abundance increases in response to DNA replication stress	11.1381	-0.15914	0.00200474	0.0261025	12.959	-0.2	0.004	0.0578771	no
YJL005W	CYR1	10	425157	431237	W	adenylate cyclase|FIL1|TSM0185|SRA4|HSR1|CDC35	Adenylate cyclase; required for cAMP production and cAMP-dependent protein kinase signaling; the cAMP pathway controls a variety of cellular processes, including metabolism, cell cycle, stress response, stationary phase, and sporulation	12.3394	-0.0397558	0.363505	0.664308	10.435	-0.2	0.65	0.879112	no
YKR002W	PAP1	11	443232	444938	W	polynucleotide adenylyltransferase PAP1	Poly(A) polymerase; one of three factors required for mRNA 3'-end polyadenylation, forms multiprotein complex with polyadenylation factor I (PF I), also required for mRNA nuclear export; may also polyadenylate rRNAs; required for gene looping	11.548	0.0299449	0.322146	0.62931	13.215	-0.2	0.15	0.507843	no
YLL048C	YBT1	12	41280	46265	C	bile acid-transporting ATPase YBT1|BAT1	Transporter of the ATP-binding cassette (ABC) family; involved in bile acid transport; negative regulator of vacuole fusion; regulates release of lumenal Ca2+ stores; similar to mammalian bile transporters; YBT1 has a paralog, VMR1, that arose from the whole genome duplication	13.8239	0.00089775	0.977276	0.992452	13.509	-0.2	0.48	0.8	no
YNL044W	YIP3	14	545268	545877	W		Protein localized to COPII vesicles; proposed to be involved in ER to Golgi transport; interacts with members of the Rab GTPase family and Yip1p; also interacts with Rtn1p	11.877	-0.0461097	0.301208	0.606314	14.772	-0.2	0.12	0.456388	no
YNL123W	NMA111	14	394685	397678	W	YNM3	Serine protease and general molecular chaperone; involved in response to heat stress and promotion of apoptosis; may contribute to lipid homeostasis; sequence similarity to the mammalian Omi/HtrA2 family of serine proteases	13.4045	0.013131	0.66787	0.864041	13.296	-0.2	0.042	0.260239	no
YOL060C	MAM3	15	214017	216137	C		Protein required for normal mitochondrial morphology; has similarity to hemolysins	11.5942	-0.0560844	0.204074	0.503252	12.323	-0.2	0.006	0.0736493	no
YOR038C	HIR2	15	402761	405388	C	SPT1	Subunit of HIR nucleosome assembly complex; involved in regulation of histone gene transcription; recruits Swi-Snf complexes to histone gene promoters; promotes heterochromatic gene silencing with Asf1p; relocalizes to the cytosol in response to hypoxia	11.0514	-0.0267214	0.4814	0.748842	12.119	-0.2	0.16	0.51995	no
YOR125C	CAT5	15	559030	559731	C	putative monooxygenase CAT5|COQ7	Protein required for ubiquinone (Coenzyme Q) biosynthesis; localizes to the matrix face of the mitochondrial inner membrane in a large complex with ubiquinone biosynthetic enzymes; required for gluconeogenic gene activation	9.98788	-0.0821002	0.0816364	0.305076	13.98	-0.2	0.042	0.260239	no
YPL093W	NOG1	16	370978	372921	W	putative GTPase NOG1	Putative GTPase; associates with free 60S ribosomal subunits in the nucleolus and is required for 60S ribosomal subunit biogenesis; constituent of 66S pre-ribosomal particles; member of the ODN family of nucleolar G-proteins	14.4925	-0.0611818	0.0861508	0.315795	12.867	-0.2	0.005	0.065736	no
YPR028W	YOP1	16	623527	624202	W	YIP2	Reticulon-interacting protein; ER integral membrane protein involved in the generation of tubular ER morphology; promotes membrane curvature; forms tubules in vitro; regulates the ER asymmetry-induced inheritance block during ER stress; role in ER-derived peroxisomal biogenesis; interacts with Yip1p to mediate membrane traffic and with Sey1p to maintain ER morphology; facilitates lipid exchange b…	13.5668	-0.0374531	0.336311	0.641522	13.682	-0.2	0.23	0.607238	no
YDR334W	SWR1	4	1135932	1140476	W	chromatin-remodeling protein SWR1	Swi2/Snf2-related ATPase; structural component of the SWR1 complex, which exchanges histone variant H2AZ (Htz1p) for chromatin-bound histone H2A; relocalizes to the cytosol in response to hypoxia; chronological aging factor that mediates lifespan extension by dietary restriction	12.3879	0.0605408	0.0434539	0.213194	11.856	-0.19	0.065	0.333366	no
YER167W	BCK2	5	518216	520771	W	CTR7	Serine/threonine-rich protein involved in PKC1 signaling pathway; protein kinase C (PKC1) signaling pathway controls cell integrity; overproduction suppresses pkc1 mutations	11.9563	-0.032203	0.323884	0.630779	12.472	-0.19	0.049	0.287127	no
YJL109C	UTP10	10	212000	217309	C	snoRNA-binding rRNA-processing protein UTP10	Nucleolar protein; component of the small subunit (SSU) processome containing the U3 snoRNA that is involved in processing of pre-18S rRNA; mutant has increased aneuploidy tolerance	13.9401	-0.0178663	0.698268	0.878451	14.047	-0.19	0.017	0.153951	no
YJL154C	VPS35	10	131101	133935	C	retromer subunit VPS35|VPT7|GRD9	Endosomal subunit of membrane-associated retromer complex; required for retrograde transport; receptor that recognizes retrieval signals on cargo proteins, forms subcomplex with Vps26p and Vps29p that selects cargo proteins for retrieval; interacts with Ypt7p; overexpression of wild-type human VPS35 or Parkinson's-associated vps35-D686N or vps35-P299S variants complements Ni2+ resistance and Cd2+…	12.3408	-0.0222769	0.512054	0.766853	13.846	-0.19	0.39	0.735688	no
YKL141W	SDH3	11	179667	180263	W	succinate dehydrogenase cytochrome b subunit SDH3|YKL4|CYB3	Subunit of succinate dehydrogenase and of TIM22 translocase; functions as cytochrome b subunit of succinate dehydrogenase, which couples oxidation of succinate to transfer of electrons to ubiquinone as part of the TCA cycle and the mitochondrial respiratory chain; also required for mitochondrial inner membrane protein import as part of the TIM22 complex; SDH3 has a paralog, SHH3, that arose from …	11.8238	0.0121833	0.730578	0.894379	12.954	-0.19	0.13	0.470909	no
YKL215C	OXP1	11	26827	30687	C	5-oxoprolinase	5-oxoprolinase; enzyme is ATP-dependent and functions as a dimer; similar to mouse Oplah gene; green fluorescent protein (GFP)-fusion protein localizes to the cytoplasm; protein abundance increases in response to DNA replication stress	11.772	0.0135754	0.728524	0.893195	13.082	-0.19	0.056	0.306638	no
YLR398C	SKI2	12	915156	919019	C	SKI complex RNA helicase subunit SKI2	Ski complex component and putative RNA helicase; mediates 3'-5' RNA degradation by the cytoplasmic exosome; null mutants have superkiller phenotype of increased viral dsRNAs and are synthetic lethal with mutations in 5'-3' mRNA decay; mutations in the human ortholog, SKIV2L, causes Syndromic diarrhea/Trichohepatoenteric (SD/THE) syndrome	12.553	-0.00705609	0.858975	0.946287	12.617	-0.19	0.062	0.32375	no
YML054C	CYB2	13	165533	167308	C	FCB2	Cytochrome b2 (L-lactate cytochrome-c oxidoreductase); component of the mitochondrial intermembrane space, required for lactate utilization; expression is repressed by glucose and anaerobic conditions	9.15378	0.0243661	0.665502	0.863361	11.894	-0.19	0.13	0.470909	no
YMR070W	MOT3	13	409154	410626	W	[MOT3]|[MOT3+]|ROX7	Transcriptional repressor, activator; role in cellular adjustment to osmotic stress including modulation of mating efficiency; involved in repression of subset of hypoxic genes by Rox1p, repression of several DAN/TIR genes during aerobic growth, ergosterol biosynthetic genes in response to hyperosmotic stress; contributes to recruitment of Tup1p-Cyc8p general repressor to promoters; relocalizes t…	11.4031	-0.0182349	0.635073	0.846334	14.92	-0.19	0.038	0.245436	no
YOR165W	SEY1	15	644566	646896	W	dynamin-like GTPase SEY1	Dynamin-like GTPase that mediates homotypic ER fusion; has a role in ER morphology; interacts physically and genetically with Yop1p and Rtn1p; functional ortholog of the human atlastin ATL1, defects in which cause a form of the human disease hereditary spastic paraplegia; homolog of Arabidopsis RHD3	12.7713	-0.0296372	0.279327	0.582437	13.813	-0.19	0.17	0.530482	no
YPR160W	GPH1	16	861306	864014	W	glycogen phosphorylase	Glycogen phosphorylase required for the mobilization of glycogen; non-essential; regulated by cyclic AMP-mediated phosphorylation; phosphorylation by Cdc28p may coordinately regulate carbohydrate metabolism and the cell cycle; expression is regulated by stress-response elements and by the HOG MAP kinase pathway	11.2877	-0.0786192	0.224144	0.524911	13.628	-0.19	0.009	0.0975314	no
YBL004W	UTP20	2	227636	235117	W		Component of the small-subunit (SSU) processome; SSU processome is involved in the biogenesis of the 18S rRNA	13.5849	0.050018	0.157478	0.436343	12.574	-0.18	0.06	0.315213	no
YCR057C	PWP2	3	220457	223228	C	snoRNA-binding rRNA-processing protein PWP2|UTP1|YCR058C|YCR055C	Conserved 90S pre-ribosomal component; essential for proper endonucleolytic cleavage of the 35 S rRNA precursor at A0, A1, and A2 sites; contains eight WD-repeats; PWP2 deletion leads to defects in cell cycle and bud morphogenesis	13.5562	-0.04853	0.0934167	0.330635	13.31	-0.18	0.05	0.291667	no
YDR155C	CPR1	4	768512	769000	C	peptidylprolyl isomerase CPR1|CPH1|CYP1	Cytoplasmic peptidyl-prolyl cis-trans isomerase (cyclophilin); catalyzes the cis-trans isomerization of peptide bonds N-terminal to proline residues; binds the drug cyclosporin A; N-terminally propionylated in vivo; protein abundance increases in response to DNA replication stress	15.3362	-0.149448	0.000485925	0.00905016	14.338	-0.18	0.031	0.224902	no
YER155C	BEM2	5	476345	482848	C	TSL1|SUP9|IPL2	Rho GTPase activating protein (RhoGAP); involved in the control of cytoskeleton organization and cellular morphogenesis; required for bud emergence; potential GAP for Rho4p	13.655	0.0361804	0.402563	0.692395	12.113	-0.18	0.081	0.378682	no
YFR030W	MET10	6	213312	216419	W	sulfite reductase subunit alpha	Subunit alpha of assimilatory sulfite reductase; complex converts sulfite into sulfide	12.5455	0.124585	0.00567151	0.0550413	13.764	-0.18	0.099	0.415064	no
YGL012W	ERG4	7	472855	474276	W	delta(24(24(1)))-sterol reductase	C-24(28) sterol reductase; catalyzes the final step in ergosterol biosynthesis; mutants are viable, but lack ergosterol	14.0253	0.0531272	0.135167	0.405783	12.576	-0.18	0.37	0.725985	no
YGL070C	RPB9	7	374459	374827	C	DNA-directed RNA polymerase II core subunit RPB9|B12.6|SSU73|SHI	RNA polymerase II subunit B12.6; contacts DNA; mutations affect transcription start site selection and fidelity of transcription	10.2209	-0.0747381	0.12593	0.38901	13.605	-0.18	0.2	0.571744	no
YGR201C	YGR201C	7	902520	903197	C		Putative protein of unknown function	9.1843	-0.00213526	0.964421	0.98699	11.342	-0.18	0.093	0.408254	no
YGR218W	CRM1	7	932541	935795	W	exportin CRM1|XPO1|KAP124	Major karyopherin; involved in export of proteins, RNAs, and ribosomal subunits from the nucleus; exportin	13.5063	0.0190622	0.597832	0.821519	13.628	-0.18	0.033	0.229758	no
YHR133C	NSG1	8	370722	371597	C		Protein involved in regulation of sterol biosynthesis; specifically stabilizes Hmg2p, one of two HMG-CoA isoenzymes that catalyze the rate-limiting step in sterol biosynthesis; forms foci at the nuclear periphery upon DNA replication stress; relocalizes to the cytosol in response to hypoxia; homolog of mammalian INSIG proteins; NSG1 has a paralog, NSG2, that arose from the whole genome duplication	12.1497	-0.0147287	0.677079	0.866487	13.545	-0.18	0.13	0.470909	no
YHR135C	YCK1	8	372694	374310	C	serine/threonine protein kinase YCK1|CKI2	Palmitoylated plasma membrane-bound casein kinase I (CK1) isoform; shares redundant functions with Yck2p in morphogenesis, proper septin assembly, endocytic trafficking, and glucose sensing; stabilized by Sod1p binding in the presence of glucose and oxygen, causing glucose repression of respiratory metabolism; involved in the phosphorylation and regulation of glucose sensor Rgt2p; YCK1 has a para…	12.4658	-0.0131681	0.744386	0.899141	8.33286	-0.18	0.59	0.86431	no
YHR197W	RIX1	8	493896	496187	W	IPI2	Component of the Rix1 complex and possibly pre-replicative complexes; required for processing of ITS2 sequences from 35S pre-rRNA; component of the pre-60S ribosomal particle with the dynein-related AAA-type ATPase Mdn1p; required for pre-replicative complex (pre-RC) formation and maintenance during DNA replication licensing; relocalizes to the cytosol in response to hypoxia; essential gene	12.8745	-0.013847	0.734696	0.895277	12.386	-0.18	0.072	0.3552	no
YJL050W	MTR4	10	342522	345743	W	ATP-dependent RNA helicase MTR4|DOB1	ATP-dependent 3'-5' RNA helicase of the DExD/H family; involved in nuclear RNA processing and degradation both as a component of TRAMP complex and in TRAMP-independent processes; TRAMP unwinds RNA duplexes, with Mtr4p unwinding activity stimulated by Pap2p/Air2p but not dependent on ongoing polyadenylation; contains an arch domain, with two coiled-coil arms/stalks and a globular fist/KOW domain, …	14.0905	-0.104085	0.000138002	0.00346813	12.833	-0.18	0.008	0.088547	no
YLL040C	VPS13	12	54211	63645	C	membrane morphogenesis protein VPS13|VPT2|SOI1	Protein involved in prospore membrane morphogenesis; peripheral membrane protein that localizes to the prospore membrane and at numerous membrane contact sites; involved in sporulation, vacuolar protein sorting, prospore membrane formation during sporulation, and protein-Golgi retention; required for mitochondrial integrity; contains a PH-like domain; homologous to human CHAC and COH1 which are i…	12.7545	-0.0230456	0.63851	0.847664	11.857	-0.18	0.033	0.229758	no
YMR304W	UBP15	13	874987	878679	W	ubiquitin-specific protease UBP15	Ubiquitin-specific protease involved in protein deubiquitination; forms a complex with AAA peroxins Pex1p and Pex6p; deubiquitinates mono- and polyubiquitinated forms of Pex5p; deubiquitinates Clb5p, counteracting APC activity, and facilitating both Clb5p accumulation and S phase entry; physically interacts with anaphase-promoting complex/cyclosome (APC/C) activator, Cdh1p; catalytic activity reg…	11.5622	-0.0308605	0.432821	0.718455	11.289	-0.18	0.17	0.530482	no
YNL200C	NNR1	14	263713	264453	C	NADHX epimerase	NADHX epimerase; catalyzes isomerization of (R)- and (S)-NADHX; homologous to AIBP in mammals and the N- terminal domain of YjeF in E.coli; enzyme is widespread in eukaryotes, prokaryotes and archaea; the authentic, non-tagged protein is detected in highly purified mitochondria in high-throughput studies	9.9432	-0.0369422	0.509588	0.766313	12.336	-0.18	0.1	0.415064	no
YOL057W	YOL057W	15	220767	222902	W	dipeptidyl-peptidase III	Dipeptidyl-peptidase III; cleaves dipeptides from the amino terminus of target proteins; highly active on synthetic substrate Arg-Arg-2-naphthylamide; mammalian ortholog may be a biomarker for some cancers	12.579	-0.0731007	0.0412115	0.207919	13.502	-0.18	0.27	0.64333	no
YOL082W	ATG19	15	168727	169974	W	CVT19	Receptor protein for the cytoplasm-to-vacuole targeting (Cvt) pathway; delivers cargo proteins aminopeptidase I (Ape1p) and alpha-mannosidase (Ams1p) to the phagophore assembly site for packaging into Cvt vesicles; interaction with Atg19p during the Cvt pathway requires phosphorylation by Hrr25p	10.9582	-0.101271	0.00649684	0.0610936	11.843	-0.18	0.087	0.397407	no
YOL098C	SDD3	15	132725	135838	C		Putative metalloprotease; overproduction suppresses lethality due to expression of the dominant PET9 allele AAC2-A128P	13.1608	0.0448707	0.199496	0.498752	13.893	-0.18	0.036	0.239077	no
YPL207W	TYW1	16	159909	162341	W	putative tRNA 4-demethylwyosine synthase	Iron-sulfer protein required for synthesis of Wybutosine modified tRNA; Wybutosine is a modified guanosine found at the 3'-position adjacent to the anticodon of phenylalanine tRNA which supports reading frame maintenance by stabilizing codon-anticodon interactions; induction by Yap5p in response to iron provides protection from high iron toxicity; overexpression results in increased cellular iron	13.694	-0.042412	0.117106	0.374071	11.943	-0.18	0.046	0.273885	no
YPR091C	NVJ2	16	716156	718468	C		Lipid-binding ER protein, enriched at nucleus-vacuolar junctions (NVJ); may be involved in sterol metabolism or signaling at the NVJ; contains a synaptotagmin-like-mitochondrial-lipid binding protein (SMP) domain; binds phosphatidylinositols and other lipids in a large-scale study; may interact with ribosomes, based on co-purification experiments	12.1394	0.0129701	0.768143	0.90792	13.249	-0.18	0.22	0.594161	no
YAL017W	PSK1	1	120225	124295	W	serine/threonine protein kinase PSK1|FUN31	PAS domain-containing serine/threonine protein kinase; coordinately regulates protein synthesis and carbohydrate metabolism and storage in response to a unknown metabolite that reflects nutritional status; PSK1 has a paralog, PSK2, that arose from the whole genome duplication	11.4378	0.0467278	0.328212	0.634484	13.681	-0.17	0.013	0.130504	no
YCR077C	PAT1	3	250238	252628	C	MRT1	Deadenylation-dependent mRNA-decapping factor; also required for faithful chromosome transmission, maintenance of rDNA locus stability, and protection of mRNA 3'-UTRs from trimming; associated with topoisomerase II; binds to mRNAs under glucose starvation, most often in the 3' UTR; functionally linked to Pab1p; forms cytoplasmic foci upon DNA replication stress; phosphorylation by PKA inhibits P …	12.4449	-0.025342	0.401255	0.69159	13.586	-0.17	0.004	0.0578771	no
YDL022W	GPD1	4	411825	413000	W	glycerol-3-phosphate dehydrogenase (NAD(+)) GPD1|OSR5|OSG1|HOR1|DAR1	NAD-dependent glycerol-3-phosphate dehydrogenase; key enzyme of glycerol synthesis, essential for growth under osmotic stress; expression regulated by high-osmolarity glycerol response pathway; protein abundance increases in response to DNA replication stress; constitutively inactivated via phosphorylation by the protein kinases Ypk1p and Ypk2p, dephosphorylation increases catalytic activity; for…	12.9337	-0.123574	0.0134639	0.102975	14.458	-0.17	0.0001	0.00438983	no
YDL171C	GLT1	4	149203	155640	C	glutamate synthase (NADH)	NAD(+)-dependent glutamate synthase (GOGAT); synthesizes glutamate from glutamine and alpha-ketoglutarate; with Gln1p, forms the secondary pathway for glutamate biosynthesis from ammonia; expression regulated by nitrogen source; assembles into filaments as cells approach stationary phase and under cytosolic acidification and starvation conditions	13.3638	0.0436669	0.185892	0.478448	13.547	-0.17	0.005	0.065736	no
YDL209C	CWC2	4	86207	87226	C	NTC40	Member of the NineTeen Complex (NTC); this complex contains Prp19p and stabilizes U6 snRNA in catalytic forms of the spliceosome containing U2, U5, and U6 snRNAs; binds directly to U6 snRNA; similar to S. pombe Cwf2	10.3033	-0.0352064	0.449703	0.727182	14.087	-0.17	0.033	0.229758	no
YDR055W	PST1	4	563527	564861	W	HPF2	Cell wall protein that contains a putative GPI-attachment site; secreted by regenerating protoplasts; up-regulated by activation of the cell integrity pathway, as mediated by Rlm1p; upregulated by cell wall damage via disruption of FKS1; PST1 has a paralog, ECM33, that arose from the whole genome duplication	13.4207	-0.018568	0.716984	0.887937	14.344	-0.17	0.046	0.273885	no
YDR097C	MSH6	4	640109	643837	C	PMS6|mismatch repair ATPase MSH6|PMS3	Protein required for mismatch repair in mitosis and meiosis; forms a complex with Msh2p to repair both single-base & insertion-deletion mispairs; also involved in interstrand cross-link repair; potentially phosphorylated by Cdc28p	12.034	-0.0162048	0.650024	0.853179	11.617	-0.17	0.19	0.560478	no
YDR162C	NBP2	4	780390	781100	C		Protein involved in the HOG (high osmolarity glycerol) pathway; negatively regulates Hog1p by recruitment of phosphatase Ptc1p the Pbs2p-Hog1p complex; interacts with Bck1p and down regulates the cell wall integrity pathway; found in the nucleus and cytoplasm, contains an SH3 domain and a Ptc1p binding domain (PBM)	10.5397	0.078635	0.0297646	0.168598	11.672	-0.17	0.019	0.165134	no
YDR294C	DPL1	4	1050459	1052228	C	sphinganine-1-phosphate aldolase DPL1|BST1	Dihydrosphingosine phosphate lyase; regulates intracellular levels of sphingolipid long-chain base phosphates (LCBPs), degrades phosphorylated long chain bases, prefers C16 dihydrosphingosine-l-phosphate as a substrate	12.8119	-0.00520618	0.887712	0.958058	13.246	-0.17	0.21	0.586731	no
YGL242C	YGL242C	7	44652	45197	C		Protein of unknown function; N-terminally propionylated in vivo; deletion mutant is viable	11.0364	-0.0210369	0.578245	0.810101	13.891	-0.17	0.067	0.338926	no
YGR097W	ASK10	7	678695	682135	W	RGC2	Regulator of the Fps1p glycerol channel; under nonstress conditions, binds to Fps1p to positively regulate glycerol transport; under osmotic stress, multiple phosphorylation by Hog1p causes Ask10p to dissociate from Fps1p; forms homodimers and heterodimerizes with paralog Rgc1p; phosphorylated in response to oxidative stress; has a role in destruction of Ssn8p; associates with RNA polymerase II h…	11.8251	0.0777373	0.0828928	0.307723	12.701	-0.17	0.053	0.299063	no
YHR023W	MYO1	8	151666	157452	W	myosin 1	Type II myosin heavy chain; required for wild-type cytokinesis and cell separation; localizes to the actomyosin ring; binds to myosin light chains Mlc1p and Mlc2p through its IQ1 and IQ2 motifs respectively	12.7917	0.0200071	0.62606	0.840442	12.393	-0.17	0.076	0.361838	no
YJR048W	CYC1	10	526335	526664	W	cytochrome c isoform 1	Cytochrome c, isoform 1; also known as iso-1-cytochrome c; electron carrier of mitochondrial intermembrane space that transfers electrons from ubiquinone-cytochrome c oxidoreductase to cytochrome c oxidase during cellular respiration; CYC1 has a paralog, CYC7, that arose from the whole genome duplication; human homolog CYC1 can complement yeast null mutant; mutations in human CYC1 cause insulin-r…	9.52486	-0.0025678	0.958314	0.984425	15.467	-0.17	0.75	0.919309	no
YKL157W	APE2	11	154991	158232	W	metallo-aminopeptidase|YKL158W|LAP1	Aminopeptidase yscII; may have a role in obtaining leucine from dipeptide substrates; APE2 has a paralog, AAP1, that arose from the whole genome duplication	13.2397	-0.0363016	0.21996	0.520492	13.389	-0.17	0.014	0.13683	no
YLR019W	PSR2	12	180288	181481	W	putative phosphatase	Plasma membrane phosphatase involved in the general stress response; required with Psr1p and Whi2p for full activation of STRE-mediated gene expression, possibly through dephosphorylation of Msn2p; PSR2 has a paralog, PSR1, that arose from the whole genome duplication	11.3383	-0.0784562	0.0210847	0.13711	12.756	-0.17	0.049	0.287127	no
YMR021C	MAC1	13	317165	318418	C	CUA1	Copper-sensing transcription factor; involved in regulation of genes required for high affinity copper transport; required for regulation of yeast copper genes in response to DNA-damaging agents; undergoes changes in redox state in response to changing levels of copper or MMS	10.45	0.0222555	0.58451	0.81548	13.228	-0.17	0.23	0.607238	no
YMR054W	STV1	13	383303	385975	W	H(+)-transporting V0 sector ATPase subunit a	Subunit a of the vacuolar-ATPase V0 domain; one of two isoforms (Stv1p and Vph1p); Stv1p is located in V-ATPase complexes of the Golgi and endosomes while Vph1p is located in V-ATPase complexes of the vacuole	12.3826	0.00870071	0.772554	0.910575	12.397	-0.17	0.15	0.507843	no
YMR089C	YTA12	13	445609	448086	C	m-AAA protease subunit YTA12|RCA1	Mitochondrial inner membrane m-AAA protease component; mediates degradation of misfolded or unassembled proteins; also required for correct assembly of mitochondrial enzyme complexes; overexpression of human AFG3L2 complements respiratory defect of yeast afg3 yta12 double null mutation, but overexpression of disease-associated AFG3L2 variants does not; expression of both human SPG7 (paraplegin) a…	12.5233	-0.0107894	0.722936	0.891648	12.294	-0.17	0.039	0.250025	no
YMR173W	DDR48	13	608689	609981	W	DNA damage-responsive protein 48|FSP	DNA damage-responsive protein; expression is increased in response to heat-shock stress or treatments that produce DNA lesions; contains multiple repeats of the amino acid sequence NNNDSYGS; protein abundance increases in response to DNA replication stress	13.5504	-0.19408	6.33167e-05	0.00196511	10.727	-0.17	0.004	0.0578771	no
YMR246W	FAA4	13	759807	761891	W	long-chain fatty acid-CoA ligase FAA4	Long chain fatty acyl-CoA synthetase; activates fatty acids with a preference for C12:0-C16:0 chain lengths; role in the competitive import of long-chain fatty acids and sphingoid long-chain bases; role in stationary phase survival; localizes to lipid particles and the plasma membrane; role in sphingolipid-to-glycerolipid metabolism; forms cytoplasmic foci upon replication stress; faa1 faa4 doubl…	14.2573	0.0212962	0.602963	0.823777	12.725	-0.17	0.027	0.205073	no
YMR250W	GAD1	13	770801	772558	W	glutamate decarboxylase GAD1	Glutamate decarboxylase; converts glutamate into gamma-aminobutyric acid (GABA) during glutamate catabolism; involved in response to oxidative stress	11.0261	-0.100169	0.122239	0.382952	13.06	-0.17	0.14	0.488679	no
YMR266W	RSN1	13	798518	801379	W		Membrane protein of unknown function; overexpression suppresses NaCl sensitivity of sro7 mutant cells by restoring sodium pump (Ena1p) localization to the plasma membrane	13.1562	0.0165729	0.632576	0.844854	11.94	-0.17	0.051	0.292882	no
YNL115C	YNL115C	14	410119	412053	C		Putative protein of unknown function; green fluorescent protein (GFP)-fusion protein localizes to mitochondria; YNL115C is not an essential gene	11.2458	-0.11988	0.000880859	0.014009	12.839	-0.17	0.03	0.220739	no
YNL310C	ZIM17	14	51907	52431	C	HEP1|TIM15|FMP28	Protein co-chaperone with a zinc finger motif; essential for protein import into mitochondria; may act with Pam18p to facilitate recognition and folding of imported proteins by Ssc1p (mtHSP70) in the mitochondrial matrix; required for the maintenance of Ssc1p solubility and assists in the functional interaction of Ssc1p with substrate proteins	9.93246	-0.0407634	0.362629	0.664011	11.049	-0.17	0.21	0.586731	no
YPL151C	PRP46	16	266180	267535	C	mRNA splicing protein PRP46|NTC50	Member of the NineTeen Complex (NTC); this complex contains Prp19p and stabilizes U6 snRNA in catalytic forms of the spliceosome containing U2, U5, and U6 snRNAs	10.6523	-0.0998369	0.00863964	0.0753351	12.803	-0.17	0.01	0.104858	no
YCR018C	SRD1	3	148238	148903	C		Protein involved in the processing of pre-rRNA to mature rRNA; contains a C2/C2 zinc finger motif; srd1 mutation suppresses defects caused by the rrp1-1 mutation	9.92113	-0.0747588	0.145855	0.420327	12.495	-0.16	0.16	0.51995	no
YDR001C	NTH1	4	450220	452475	C	alpha,alpha-trehalase NTH1	Neutral trehalase, degrades trehalose; required for thermotolerance and may mediate resistance to other cellular stresses; phosphorylated and activated by Cdc28p at the G1/S phase transition to coordinately regulate carbohydrate metabolism and the cell cycle; inhibited by Dcs1p; NTH1 has a paralog, NTH2, that arose from the whole genome duplication	12.3561	0.0386676	0.314769	0.621874	11.511	-0.16	0.53	0.837523	no
YDR122W	KIN1	4	694700	697894	W	serine/threonine protein kinase KIN1	Serine/threonine protein kinase involved in regulation of exocytosis; localizes to the cytoplasmic face of the plasma membrane; KIN1 has a paralog, KIN2, that arose from the whole genome duplication	11.4192	-0.019142	0.642048	0.849553	12.378	-0.16	0.12	0.456388	no
YER013W	PRP22	5	178841	182278	W	DEAH-box ATP-dependent RNA helicase PRP22	DEAH-box RNA-dependent ATPase/ATP-dependent RNA helicase; associates with lariat intermediates before the second catalytic step of splicing; mediates ATP-dependent mRNA release from the spliceosome and unwinds RNA duplexes; required for proofreading the exon ligation reaction	11.4491	0.0689679	0.0633575	0.261577	12.71	-0.16	0.18	0.549764	no
YER031C	YPT31	5	214076	214747	C	Rab family GTPase YPT31|YPT8	Rab family GTPase; involved in the exocytic pathway; mediates intra-Golgi traffic or the budding of post-Golgi vesicles from the trans-Golgi; YPT31 has a paralog, YPT32, that arose from the whole genome duplication; localizes to the transitional and late Golgi	12.562	-0.109819	0.000994312	0.0155496	14.582	-0.16	0.005	0.065736	no
YGL013C	PDR1	7	469092	472298	C	drug-responsive transcription factor PDR1|TPE3|TPE1|TIL1|SMR2|NRA2|CYH3|BOR2|ANT1|AMY1	Transcription factor that regulates the pleiotropic drug response; zinc cluster protein that is a master regulator involved in recruiting other zinc cluster proteins to pleiotropic drug response elements (PDREs) to fine tune the regulation of multidrug resistance genes; relocalizes to the cytosol in response to hypoxia; PDR1 has a paralog, PDR3, that arose from the whole genome duplication	12.0254	0.0636003	0.0880883	0.319415	11.198	-0.16	0.26	0.635283	no
YGL137W	SEC27	7	249869	252738	W	coatomer subunit beta'	Essential beta'-coat protein of the COPI coatomer; involved in ER-to-Golgi and Golgi-to-ER transport; contains WD40 domains that mediate cargo selective interactions; 45% sequence identity to mammalian beta'-COP	14.1214	-0.0471241	0.0635681	0.262247	14.449	-0.16	0.01	0.104858	no
YGL207W	SPT16	7	98969	102076	W	chromatin-remodeling protein SPT16|SSF1|CDC68	Subunit of the heterodimeric FACT complex (Spt16p-Pob3p); FACT associates with chromatin via interaction with Nhp6Ap and Nhp6Bp, and reorganizes nucleosomes to facilitate access to DNA by RNA and DNA polymerases; specifically required for diauxic shift-induced H2B deposition onto rDNA genes; mutations cause reduced nucleosome occupancy over highly transcribed regions; coregulates transcription wi…	13.6753	0.0334493	0.434637	0.718821	13.272	-0.16	0.034	0.230524	no
YGR248W	SOL4	7	985972	986739	W	6-phosphogluconolactonase SOL4	6-phosphogluconolactonase; protein abundance increases in response to DNA replication stress; SOL4 has a paralog, SOL3, that arose from the whole genome duplication	8.94996	-0.0483443	0.44032	0.722567	13.32	-0.16	0.017	0.153951	no
YHL030W	ECM29	8	40084	45690	W		Scaffold protein; assists in association of the proteasome core particle with the regulatory particle; inhibits proteasomal ATPase activity; degraded by the mature proteasome after assembly; contains HEAT-like repeats; protein increases in abundance and relocalizes from nucleus to cytoplasm upon DNA replication stress	12.0933	0.0525316	0.138586	0.412177	13.21	-0.16	0.14	0.488679	no
YJL098W	SAP185	10	242082	245258	W		Protein that forms a complex with the Sit4p protein phosphatase; required for Sit4p function; member of a family of similar proteins including Sap4p, Sap155p, and Sap190p; SAP185 has a paralog, SAP190, that arose from the whole genome duplication	13.0483	-0.0264445	0.420361	0.707078	11.955	-0.16	0.11	0.438983	no
YLR093C	NYV1	12	326513	327415	C	MAM2	v-SNARE component of the vacuolar SNARE complex; involved in vesicle fusion; inhibits ATP-dependent Ca(2+) transport activity of Pmc1p in the vacuolar membrane	11.522	0.00293285	0.927418	0.974848	12.089	-0.16	0.24	0.618507	no
YLR378C	SEC61	12	875736	877178	C	translocon subunit SEC61	Conserved ER protein translocation channel; essential subunit of Sec61 complex (Sec61p, Sbh1p, and Sss1p); forms channel for SRP-dependent protein import; with Sec63 complex allows SRP-independent protein import into ER; involved in posttranslational soluble protein import into the ER, ERAD of soluble substrates, and misfolded soluble protein export from the ER	13.1298	-0.0428046	0.2376	0.541326	13.03	-0.16	0.24	0.618507	no
YLR389C	STE23	12	899577	902660	C	metalloendopeptidase	Metalloprotease; involved in N-terminal processing of pro-a-factor to mature form; expressed in both haploids and diploids; one of two yeast homologs of human insulin-degrading enzyme (hIDE); homolog Axl1p is also involved in processing of pro-a-factor	12.8256	0.00542083	0.855551	0.944142	12.523	-0.16	0.16	0.51995	no
YLR419W	YLR419W	12	958428	962735	W	putative helicase	Putative helicase with limited sequence similarity to human Rb protein; the authentic, non-tagged protein is detected in highly purified mitochondria in high-throughput studies; YLR419W is not an essential gene	12.239	0.0163856	0.634169	0.846334	11.94	-0.16	0.069	0.344335	no
YMR215W	GAS3	13	696796	698370	W	putative 1,3-beta-glucanosyltransferase	Putative 1,3-beta-glucanosyltransferase; has similarity go other GAS family members; low abundance, possibly inactive member of the GAS family of GPI-containing proteins; localizes to the cell wall; mRNA induced during sporulation	12.959	-0.044624	0.130804	0.397652	12.661	-0.16	0.051	0.292882	no
YOR054C	VHS3	15	427833	429857	C	phosphopantothenoylcysteine decarboxylase complex subunit VHS3|YOR29-05	Negative regulatory subunit of protein phosphatase 1 Ppz1p; involved in coenzyme A biosynthesis; subunit of the phosphopantothenoylcysteine decarboxylase (PPCDC; Cab3p, Sis2p, Vhs3p) complex and the CoA-Synthesizing Protein Complex (CoA-SPC: Cab2p, Cab3p, Cab4p, Cab5p, Sis2p and Vhs3p)	10.8744	0.060789	0.174719	0.463583	11.898	-0.16	0.21	0.586731	no
YOR101W	RAS1	15	515244	516173	W	Ras family GTPase RAS1	GTPase involved in G-protein signaling in adenylate cyclase activation; plays a role in cell proliferation; localized to the plasma membrane; homolog of mammalian RAS proto-oncogenes; relative distribution to the nucleus increases upon DNA replication stress; RAS1 has a paralog, RAS2, that arose from the whole genome duplication	12.3044	-0.076742	0.0429667	0.212151	12.72	-0.16	0.0008	0.0181119	no
YPR042C	PUF2	16	650435	653662	C		PUF family mRNA-binding protein; Pumilio homology domain confers RNA binding activity; preferentially binds mRNAs encoding membrane-associated proteins; binding site composed of two UAAU tetranucleotides, separated by a 3-nt linker; PUF2 has a paralog, JSN1, that arose from the whole genome duplication	10.6535	0.0900276	0.0602362	0.255248	13.255	-0.16	0.12	0.456388	no
YAL041W	CDC24	1	62840	65404	W	Rho family guanine nucleotide exchange factor CDC24|CLS4	Guanine nucleotide exchange factor (GEF) for Cdc42p; required for polarity establishment and maintenance, and mutants have morphological defects in bud formation and shmooing; relocalizes from nucleus to cytoplasm upon DNA replication stress; thermosensitivity of the cdc24-4 mutant in the presence of sorbitol is functionally complemented by human CDC42	12.0048	-0.0283936	0.422489	0.708094	13.061	-0.15	0.082	0.380609	no
YBR023C	CHS3	2	284428	287925	C	chitin synthase CHS3|KTI2|DIT101|CSD2|CAL1	Chitin synthase III; catalyzes the transfer of N-acetylglucosamine (GlcNAc) to chitin; required for synthesis of the majority of cell wall chitin, the chitin ring during bud emergence, and spore wall chitosan; contains overlapping di-leucine and di-acidic signals that mediate, respectively, intracellular trafficking by AP-1 and trafficking to plasma membrane by exomer complex; requires AP-3 compl…	12.9728	0.0161313	0.581551	0.812954	13.033	-0.15	0.47	0.794582	no
YDL132W	CDC53	4	224304	226751	W	cullin CDC53	Cullin; structural protein of SCF complexes (which also contain Skp1p, Cdc34p, Hrt1p and an F-box protein) involved in ubiquitination; SCF promotes the G1-S transition by targeting G1 cyclins and the Cln-CDK inhibitor Sic1p for degradation; human homolog CUL1 can complement yeast cdc53 null mutant	12.6843	0.0302393	0.261542	0.565206	12.867	-0.15	0.39	0.735688	no
YDR409W	SIZ1	4	1289406	1292120	W	SUMO ligase SIZ1|ULL1	SUMO E3 ligase; promotes attachment of small ubiquitin-related modifier sumo (Smt3p) to primarily cytoplasmic proteins; regulates Rsp5p ubiquitin ligase activity and is in turn itself regulated by Rsp5p; required for sumoylation of septins and histone H3 variant Cse4p, a prerequisite for STUbL-mediated Ub-dependent degradation; localizes to the septin ring; acts as an adapter between E2, Ubc9p an…	10.7595	0.0500639	0.290711	0.596189	11.683	-0.15	0.36	0.720556	no
YEL040W	UTR2	5	78053	79456	W	CRH2	Chitin transglycosylase; functions in the transfer of chitin to beta(1-6) and beta(1-3) glucans in the cell wall; similar to and functionally redundant with Crh1; glycosylphosphatidylinositol (GPI)-anchored protein localized to bud neck	15.1902	0.0765331	0.0278651	0.162147	14.177	-0.15	0.31	0.678698	no
YEL058W	PCM1	5	43252	44925	W	phosphoacetylglucosamine mutase PCM1|AGM1	Essential N-acetylglucosamine-phosphate mutase; converts GlcNAc-6-P to GlcNAc-1-P, which is a precursor for the biosynthesis of chitin and for the formation of N-glycosylated mannoproteins and glycosylphosphatidylinositol anchors	12.6673	-0.04092	0.268879	0.573324	12.913	-0.15	0.11	0.438983	no
YFR049W	YMR31	6	248523	248894	W	KGD4|mitochondrial 37S ribosomal protein YMR31	Subunit of the mitochondrial alpha-ketoglutarate dehydrogenase; recruits E3 subunit (Lpd1p) to the E1-E2 (Kgd1p, Kgd2p) core; has similarity to human mitochondrial ribosomal protein MRP-S36	9.57313	0.0406725	0.437179	0.720831	15.085	-0.15	0.24	0.618507	no
YGL020C	GET1	7	457163	457870	C	GET complex subunit GET1|MDM39	Subunit of the GET complex; involved in insertion of proteins into the ER membrane; required for the retrieval of HDEL proteins from the Golgi to the ER in an ERD2 dependent fashion and for normal mitochondrial morphology and inheritance	11.8153	-0.0210852	0.557663	0.796637	13.413	-0.15	0.16	0.51995	no
YGR270W	YTA7	7	1027370	1031509	W		Protein that localizes to chromatin; has a role in regulation of histone gene expression; has a bromodomain-like region that interacts with the N-terminal tail of histone H3, and an ATPase domain; relocalizes to the cytosol in response to hypoxia; potentially phosphorylated by Cdc28p	12.8461	0.0554459	0.192286	0.488785	13.423	-0.15	0.052	0.296	no
YHR186C	KOG1	8	475999	480672	C	ubiquitin-binding TORC1 subunit KOG1|LAS24	Subunit of TORC1; TORC1 is a rapamycin-sensitive complex involved in growth control that contains Tor1p or Tor2p, Lst8p and Tco89p; contains four HEAT repeats and seven WD-40 repeats; may act as a scaffold protein to couple TOR and its effectors	11.6533	-0.00708194	0.877254	0.955137	13.031	-0.15	0.68	0.894919	no
YIL053W	GPP1	9	255115	255867	W	RHR2|glycerol-1-phosphatase RHR2	Constitutively expressed DL-glycerol-3-phosphate phosphatase; also known as glycerol-1-phosphatase; involved in glycerol biosynthesis, induced in response to both anaerobic and osmotic stress; GPP1 has a paralog, GPP2, that arose from the whole genome duplication	15.724	-0.189947	1.58251e-07	1.04682e-05	13.413	-0.15	0.034	0.230524	no
YKL062W	MSN4	11	323228	325120	W	stress-responsive transcriptional activator MSN4	Stress-responsive transcriptional activator; activated in stochastic pulses of nuclear localization in response to various stress conditions; binds DNA at stress response elements of responsive genes, inducing gene expression; involved in diauxic shift	11.2461	-0.061915	0.0981366	0.340021	12.094	-0.15	0.016	0.150691	no
YLR310C	CDC25	12	752224	756993	C	Ras family guanine nucleotide exchange factor CDC25|CDC25'|CTN1	Membrane bound guanine nucleotide exchange factor; also known as a GEF or GDP-release factor; indirectly regulates adenylate cyclase through activation of Ras1p and Ras2p by stimulating the exchange of GDP for GTP; required for progression through G1; thermosensitivity of the cdc25-5 mutant is functionally complemented by human RASGRF1 or by a fragment of human SOS1 comprising the CDC25-related c…	12.8147	0.0491382	0.169113	0.455214	13.068	-0.15	0.039	0.250025	no
YLR347C	KAP95	12	823828	826413	C	karyopherin beta|RSL1	Karyopherin beta; forms a complex with Srp1p/Kap60p; interacts with nucleoporins to mediate nuclear import of NLS-containing cargo proteins via the nuclear pore complex; regulates PC biosynthesis; GDP-to-GTP exchange factor for Gsp1p	12.7798	-0.00205805	0.941846	0.979636	12.491	-0.15	0.031	0.224902	no
YMR109W	MYO5	13	486587	490246	W	myosin 5	One of two type I myosin motors; contains proline-rich tail homology 2 (TH2) and SH3 domains; MYO5 deletion has little effect on growth, but myo3 myo5 double deletion causes severe defects in growth and actin cytoskeleton organization; MYO5 has a paralog, MYO3, that arose from the whole genome duplication	12.5497	-0.000126597	0.99721	0.999274	13.844	-0.15	0.029	0.215833	no
YOR206W	NOC2	15	727512	729644	W	mRNA-binding ribosome synthesis protein NOC2	Protein involved in ribosome biogenesis; forms a nucleolar complex with Mak21p that binds to 90S and 66S pre-ribosomes; forms a nuclear complex with Noc3p that binds to 66S pre-ribosomes; both complexes mediate intranuclear transport of ribosomal precursors; acts as part of a Mak21p-Noc2p-Rrp5p module that associates with nascent pre-rRNA during transcription and has a role in bigenesis of the la…	14.0263	0.0103543	0.757851	0.902801	13.955	-0.15	0.036	0.239077	no
YOR326W	MYO2	15	925721	930445	W	myosin 2|CDC66	Type V myosin motor involved in actin-based transport of cargos; required for the polarized delivery of secretory vesicles, the vacuole, late Golgi elements, peroxisomes, and the mitotic spindle; MYO2 has a paralog, MYO4, that arose from the whole genome duplication	14.1131	0.0339849	0.285341	0.588751	12.933	-0.15	0.13	0.470909	no
YPR164W	MMS1	16	870703	874926	W	SLM6|RTT108	Subunit of E3 ubiquitin ligase complex involved in replication repair; stabilizes protein components of the replication fork such as the fork-pausing complex and leading strand polymerase, preventing fork collapse and promoting efficient recovery during replication stress; regulates Ty1 transposition; involved with Rtt101p in nonfunctional rRNA decay	11.8955	0.0128038	0.754618	0.90226	13.521	-0.15	0.28	0.649821	no
YAL046C	BOL3	1	57029	57385	C	AIM1	Protein involved in Fe-S cluster transfer to mitochondrial clients; protects [4Fe-4S] clusters from damage due to oxidative stress by acting along with Nfu1p at a late step in the transfer of [4Fe-4S] clusters from the ISA complex to mitochondrial client proteins like lipoate synthase and succinate dehydrogenase; sequence similarity to human BOLA family member, BOLA3, mutations of which are assoc…	9.72797	-0.112093	0.0343282	0.185501	13.167	-0.14	0.48	0.8	no
YCL057C-A	MIC10	3	24032	24325	C	MOS1|MCS10|MIO10	Conserved component of the MICOS complex; MICOS (formerly MINOS or MitOS) is a mitochondrial inner membrane complex that extends into the intermembrane space and has a role in the maintenance of crista junctions, inner membrane architecture, and formation of contact sites to the outer membrane; forms a subcomplex with Mic12p and Mic27p whose assembly and stability requires cardiolipin; homo-oligo…	10.1228	-0.20076	7.61727e-05	0.00222525	14.063	-0.14	0.05	0.291667	no
YCR054C	CTR86	3	218376	220067	C		Essential protein of unknown function; with orthologs in Ashbya gossypii and Candida albicans; similar to human ATXN10, mutations in which cause spinocerebellar ataxia type 10; codon usage corresponds to that observed for yeast genes expressed at low levels; relative distribution to the nucleus increases upon DNA replication stress	11.1332	0.00621984	0.855195	0.944006	12.11	-0.14	0.2	0.571744	no
YDL063C	SYO1	4	338272	340134	C		Transport adaptor or symportin; facilitates synchronized nuclear coimport of the two 5S-rRNA binding proteins Rpl5p and Rpl11p; binds to nascent Rpl5p during translation; required for biogenesis of the large ribosomal subunit; green fluorescent protein (GFP)-fusion protein localizes to the cytoplasm and nucleus	12.9123	-0.0884177	0.00572237	0.0553446	12.762	-0.14	0.37	0.725985	no
YDL164C	CDC9	4	164987	167254	C	DNA ligase (ATP) CDC9|MMS8	DNA ligase I found in nucleus and mitochondria; essential enzyme that joins Okazaki fragments during DNA replication; also acts in ribonucleotide excision repair, base excision repair, and recombination; DNA ligase I mutants trigger ubiquitination of PCNA at K107, facilitating Rad59p-mediated bypass of unligated Okazaki fragments; human homolog LIG1 can complement yeast cdc9 temperature-sensitive…	11.6728	0.00621625	0.851584	0.942226	12.879	-0.14	0.095	0.412144	no
YDR463W	STP1	4	1386816	1388375	W	SSY2|BAP1	Transcription factor; contains a N-terminal regulatory motif (RI) that acts as a cytoplasmic retention determinant and as an Asi dependent degron in the nucleus; undergoes proteolytic processing by SPS (Ssy1p-Ptr3p-Ssy5p)-sensor component Ssy5p in response to extracellular amino acids; activates transcription of amino acid permease genes and may have a role in tRNA processing; STP1 has a paralog,…	11.9311	0.00890394	0.805595	0.923546	12.013	-0.14	0.2	0.571744	no
YER070W	RNR1	5	298950	301616	W	ribonucleotide-diphosphate reductase subunit RNR1|SDS12|RIR1|CRT7	Major isoform of large subunit of ribonucleotide-diphosphate reductase; the RNR complex catalyzes rate-limiting step in dNTP synthesis, regulated by DNA replication and DNA damage checkpoint pathways via localization of small subunits; relative distribution to the nucleus increases upon DNA replication stress; RNR1 has a paralog, RNR3, that arose from the whole genome duplication	14.0701	-0.0964928	0.0152683	0.112221	12.964	-0.14	0.058	0.311014	no
YGR116W	SPT6	7	720409	724764	W	chromatin-remodeling histone chaperone SPT6|SSN20|CRE2	Nucleosome remodeling protein; functions in various aspects of transcription, chromatin maintenance, and RNA processing; required for the maintenance of chromatin structure during transcription in order to inhibit transcription from promoters within the coding region; required for H3K36 trimethylation but not dimethylation by Set2p	13.9463	0.0213956	0.509029	0.766274	12.89	-0.14	0.35	0.714905	no
YGR271C-A	EFG1	7	1037800	1038501	C	YGR272C	Essential protein required for maturation of 18S rRNA; null mutant is sensitive to hydroxyurea and is delayed in recovering from alpha-factor arrest; green fluorescent protein (GFP)-fusion protein localizes to the nucleolus	11.4374	0.0237527	0.5824	0.813523	13.789	-0.14	0.095	0.412144	no
YHL009C	YAP3	8	84068	85060	C		Basic leucine zipper (bZIP) transcription factor	10.219	0.00108849	0.980206	0.993529	13.368	-0.14	0.01	0.104858	no
YHR049W	FSH1	8	206462	207193	W	putative serine hydrolase	Putative serine hydrolase; localizes to both the nucleus and cytoplasm; sequence is similar to S. cerevisiae Fsh2p and Fsh3p and the human candidate tumor suppressor OVCA2	12.4159	-0.139587	0.00108566	0.016442	15.481	-0.14	0.017	0.153951	no
YIR037W	HYR1	9	423128	423619	W	peroxiredoxin HYR1|ORP1|GPX3	Thiol peroxidase; functions as a hydroperoxide receptor to sense intracellular hydroperoxide levels and transduce a redox signal to the Yap1p transcription factor; HYR1 has a paralog, GPX1, that arose from the whole genome duplication	11.885	-0.113949	0.0132999	0.10242	15.522	-0.14	0.26	0.635283	no
YJL010C	NOP9	10	417562	419562	C	RNA-binding RNA processing protein NOP9	Essential subunit of U3-containing 90S preribosome; involved in production of 18S rRNA and assembly of small ribosomal subunit; also part of pre-40S ribosome and required for its export into cytoplasm; binds RNA and contains pumilio domain	12.8079	-0.0251909	0.364214	0.664308	13.323	-0.14	0.11	0.438983	no
YJL039C	NUP192	10	368748	373799	C		Essential subunit of inner ring of nuclear pore complex (NPC); plays a role in modulating transport through the NPC; homologous to human NUP205	12.9507	-0.00596251	0.871206	0.952976	14.575	-0.14	0.036	0.239077	no
YKR060W	UTP30	11	556518	557342	W		Putative subunit of U3-containing 90S preribosome complex; complex is involved in production of 18S rRNA and assembly of small ribosomal subunit	11.2283	-0.0374991	0.397095	0.688505	11.462	-0.14	0.046	0.273885	no
YLL010C	PSR1	12	129330	130613	C	phosphatase	Plasma membrane associated protein phosphatase; involved in the general stress response; required along with binding partner Whi2p for full activation of STRE-mediated gene expression, possibly through dephosphorylation of Msn2p; PSR1 has a paralog, PSR2, that arose from the whole genome duplication	11.2058	-0.000622509	0.988839	0.995064	13.606	-0.14	0.009	0.0975314	no
YLR300W	EXG1	12	728955	730301	W	glucan 1,3-beta-glucosidase|SCW6|BGL1	Major exo-1,3-beta-glucanase of the cell wall; involved in cell wall beta-glucan assembly; exists as three differentially glycosylated isoenzymes; EXG1 has a paralog, SPR1, that arose from the whole genome duplication	15.1979	-0.0884521	0.0126003	0.0984459	12.469	-0.14	0.001	0.0181119	no
YLR409C	UTP21	12	934414	937233	C	rRNA-processing protein UTP21	Subunit of U3-containing 90S preribosome and SSU processome complexes; involved in production of 18S rRNA and assembly of small ribosomal subunit; synthetic defect with STI1 Hsp90 cochaperone; human homolog linked to glaucoma; Small Subunit processome is also known as SSU processome	13.5052	-0.0576073	0.0511133	0.232535	13.94	-0.14	0.22	0.594161	no
YLR413W	INA1	12	951156	953183	W		Protein of unknown function; not an essential gene; YLR413W has a paralog, FAT3, that arose from the whole genome duplication	14.0633	0.0857373	0.0460845	0.220829	13.461	-0.14	0.65	0.879112	no
YMR231W	PEP5	13	733545	736634	W	tethering complex subunit PEP5|VPT11|VPS11|VPL9|VAM1|END1	Histone E3 ligase, component of CORVET membrane tethering complex; peripheral vacuolar membrane protein required for protein trafficking and vacuole biogenesis; interacts with Pep7p; involved in ubiquitination and degradation of excess histones	11.2856	-0.00193618	0.958843	0.984679	11.822	-0.14	0.31	0.678698	no
YMR247C	RKR1	13	763351	768039	C	ubiquitin-protein ligase RKR1|LTN1	RING domain E3 ubiquitin ligase; involved in ubiquitin-mediated degradation of non-stop proteins and translationally stalled ER membrane proteins; component of ribosome-bound RQC (ribosome quality control) complex; degrades products of mRNAs lacking a termination codon regardless of a poly(A) tail; functional connections to chromatin modification; homolog of mouse Listerin, mutations in which rep…	12.3308	0.00717285	0.861679	0.947557	11.873	-0.14	0.25	0.628031	no
YNL163C	RIA1	14	326741	330073	C	GTPase RIA1|EFL1	Cytoplasmic GTPase/eEF2-like factor involved in ribosomal biogenesis; with Sdo1p, a guanine nucleotide exchange factor (GEF), promotes release of Tif6p from 60S ribosomal subunits in the cytoplasm so that they can assemble with 40S subunits to generate mature ribosomes; required for quality control check of newly made large ribosomal subunits before they are released into the pool of translating …	12.8007	-0.0361282	0.15552	0.433633	12.788	-0.14	0.06	0.315213	no
YNL169C	PSD1	14	316169	317671	C	phosphatidylserine decarboxylase 1	Phosphatidylserine decarboxylase of the mitochondrial inner membrane; converts phosphatidylserine to phosphatidylethanolamine; regulates mitochondrial fusion and morphology by affecting lipid mixing in the mitochondrial membrane and by influencing the ratio of long to short forms of Mgm1p; partly exposed to the mitochondrial intermembrane space; autocatalytically processed	12.5357	0.002898	0.931132	0.975969	13.69	-0.14	0.36	0.720556	no
YOR014W	RTS1	15	357674	359947	W	protein phosphatase 2A regulatory subunit RTS1|SCS1	B-type regulatory subunit of protein phosphatase 2A (PP2A); Rts1p and Cdc55p are alternative regulatory subunits for PP2A catalytic subunits, Pph21p and Pph22p; PP2A-Rts1p protects cohesin when recruited by Sgo1p to the pericentromere; highly enriched at centromeres in the absence of Cdc55p; required for maintenance of septin ring organization during cytokinesis, for ring disassembly in G1 and fo…	12.506	0.0638249	0.113838	0.368883	12.63	-0.14	0.017	0.153951	no
YOR089C	VPS21	15	490196	490828	C	Rab family GTPase VPS21|YPT51|YPT21|VPT12|VPS12	Endosomal Rab family GTPase; required for endocytic transport and sorting of vacuolar hydrolases; required for endosomal localization of the CORVET complex; required with YPT52 for MVB biogenesis and sorting; involved in autophagy and ionic stress tolerance; geranylgeranylation required for membrane association; protein abundance increases in response to DNA replication stress; mammalian Rab5 hom…	11.9953	0.0429236	0.244429	0.547562	13.136	-0.14	0.02	0.171523	no
YPL126W	NAN1	16	310210	312900	W	UTP17	U3 snoRNP protein; component of the small (ribosomal) subunit (SSU) processosome containing U3 snoRNA; required for the biogenesis of18S rRNA	14.0556	-0.0253862	0.392537	0.686269	14.422	-0.14	0.034	0.230524	no
YPL141C	FRK1	16	283464	286061	C	protein kinase FRK1	Protein kinase of unknown cellular role; green fluorescent protein (GFP)-fusion protein localizes to the cytoplasm; interacts with rRNA transcription and ribosome biogenesis factors and the long chain fatty acyl-CoA synthetase Faa3p; FRK1 has a paralog, KIN4, that arose from the whole genome duplication	11.3662	0.0197794	0.575211	0.80799	11.927	-0.14	0.042	0.260239	no
YPR181C	SEC23	16	897361	899667	C	GTPase-activating protein SEC23	GTPase-activating protein, stimulates the GTPase activity of Sar1p; component of the Sec23p-Sec24p heterodimer of the COPII vesicle coat, involved in ER to Golgi transport; substrate of Ubp3/Bre5 complex; ubiquitylated by Ub-ligase Rsp5p; proteasome-mediated degradation of Sec23p is regulated by Cdc48p	13.6183	-0.00945445	0.770516	0.909783	13.41	-0.14	0.086	0.394929	no
YBR058C	UBP14	2	353672	356017	C	ubiquitin-specific protease UBP14|GID6	Ubiquitin-specific protease; specifically disassembles unanchored ubiquitin chains; involved in fructose-1,6-bisphosphatase (Fbp1p) degradation; similar to human isopeptidase T	12.4622	-0.0294711	0.283429	0.587161	12.394	-0.13	0.39	0.735688	no
YBR084W	MIS1	2	411054	413981	W	trifunctional formate-tetrahydrofolate ligase/methenyltetrahydrofolate cyclohydrolase/methylenetetrahydrofolate dehydrogenase MIS1	Mitochondrial C1-tetrahydrofolate synthase; involved in interconversion between different oxidation states of tetrahydrofolate (THF); provides activities of formyl-THF synthetase, methenyl-THF cyclohydrolase, and methylene-THF dehydrogenase	14.5003	-0.0392132	0.0943514	0.332512	13.319	-0.13	0.014	0.13683	no
YCR063W	BUD31	3	228318	228791	W	U2 snRNP complex subunit BUD31|CWC14	Component of the SF3b subcomplex of the U2 snRNP; increases efficiency of first and second step pre-mRNA splicing; diploid mutants display a random budding pattern instead of the wild-type bipolar pattern; facilitates passage through G1/S Start, but is not required for G2/M transition or exit from mitosis	7.71103	-0.0284842	0.644383	0.850557	13.776	-0.13	0.074	0.359587	no
YDR454C	GUK1	4	1366264	1366827	C	BRA3|guanylate kinase|PUR5	Guanylate kinase; converts GMP to GDP; required for growth and mannose outer chain elongation of cell wall N-linked glycoproteins	13.6696	-0.0447908	0.169857	0.456777	13.669	-0.13	0.47	0.794582	no
YEL032W	MCM3	5	86937	89852	W	MCM DNA helicase complex subunit MCM3	Protein involved in DNA replication; component of the Mcm2-7 hexameric helicase complex that binds chromatin as a part of the pre-replicative complex	12.198	-0.0379292	0.252406	0.555755	12.08	-0.13	0.37	0.725985	no
YFL017C	GNA1	6	103983	104462	C	glucosamine 6-phosphate N-acetyltransferase|PAT1	Glucosamine-6-phosphate acetyltransferase; evolutionarily conserved; required for multiple cell cycle events including passage through START, DNA synthesis, and mitosis; involved in UDP-N-acetylglucosamine synthesis, forms GlcNAc6P from AcCoA	10.6462	-0.161005	5.76352e-05	0.00181252	13.752	-0.13	0.018	0.159658	no
YGL055W	OLE1	7	398628	400160	W	stearoyl-CoA 9-desaturase|MDM2	Delta(9) fatty acid desaturase; required for monounsaturated fatty acid synthesis and for normal distribution of mitochondria	14.7254	0.0141056	0.727493	0.892691	13.031	-0.13	0.18	0.549764	no
YGL252C	RTG2	7	25718	27484	C		Sensor of mitochondrial dysfunction; regulates the subcellular location of Rtg1p and Rtg3p, transcriptional activators of the retrograde (RTG) and TOR pathways; Rtg2p is inhibited by the phosphorylated form of Mks1p	12.6639	0.0145605	0.586571	0.81616	11.515	-0.13	0.32	0.685525	no
YGR245C	SDA1	7	979765	982068	C		Protein required for actin organization and passage through Start; highly conserved nuclear protein; required for actin cytoskeleton organization; plays a critical role in G1 events; binds Nap1p; involved in 60S ribosome biogenesis	13.7919	-0.0902049	0.00546074	0.0535376	13.121	-0.13	0.27	0.64333	no
YHR031C	RRM3	8	170799	172970	C	RTT104	DNA helicase involved in rDNA replication and Ty1 transposition; binds to and suppresses DNA damage at G4 motifs in vivo; relieves replication fork pauses at telomeric regions; structurally and functionally related to Pif1p	11.3707	-0.0573468	0.0710218	0.281883	12.421	-0.13	0.83	0.948676	no
YHR115C	DMA1	8	340109	341359	C	ubiquitin-conjugating protein DMA1|CHF1	Ubiquitin-protein ligase (E3); controls septin dynamics, spindle position checkpoint (SPOC) with ligase Dma2p by regulating recruitment of Elm1p to bud neck; regulates levels of eIF2 subunit Gcd11p, as well as abundance, localization, and ubiquitination of Cdk inhibitory kinase Swe1p; ubiquitinates cyclin Pcl1p; ortholog of human RNF8, similar to human Chfr; contains FHA, RING fingers; DMA1 has a…	11.4093	-0.0330661	0.365492	0.66451	13.721	-0.13	0.21	0.586731	no
YIL125W	KGD1	9	122689	125733	W	alpha-ketoglutarate dehydrogenase KGD1|OGD1	Subunit of the mitochondrial alpha-ketoglutarate dehydrogenase complex; catalyzes a key step in the tricarboxylic acid (TCA) cycle, the oxidative decarboxylation of alpha-ketoglutarate to form succinyl-CoA	12.2109	0.051306	0.234287	0.536752	14.089	-0.13	0.091	0.405663	no
YIL130W	ASG1	9	102782	105676	W		Zinc cluster protein proposed to be a transcriptional regulator; regulator involved in the stress response; null mutants have a respiratory deficiency, calcofluor white sensitivity and slightly increased cycloheximide resistance	12.6516	0.00511319	0.901051	0.963771	13.74	-0.13	0.17	0.530482	no
YIL137C	TMA108	9	89948	92788	C	TAE3|RBF108	Ribosome-associated, nascent chain binding factor; binds N-terminal region of nascent peptides during translation; recognizes target proteins via its putative metallopeptidase peptide-binding pocket	12.2458	0.0218302	0.603435	0.823777	13.971	-0.13	0.27	0.64333	no
YJL061W	NUP82	10	320016	322157	W	linker nucleoporin NUP82|HRB187	Linker nucleoporin component of the nuclear pore complex (NPC); also part of the NPC cytoplasmic filaments; contributes to nucleocytoplasmic transport and NPC biogenesis; forms stable associations with three FG-nucleoporins (Nsp1p, Nup159p, and Nup116p); relocalizes to the cytosol in response to hypoxia	12.1527	-0.00273248	0.926978	0.974742	13.506	-0.13	0.16	0.51995	no
YKL069W	YKL069W	11	307285	307827	W	L-methionine (R)-S-oxide reductase|fRMsr|YKG9	Methionine-R-sulfoxide reductase; reduces the R enantiomer of free Met-SO, in contrast to Ycl033Cp which reduces Met-R-SO in a peptide linkage; has a role in protection against oxidative stress; relative distribution to the nucleus increases upon DNA replication stress	10.7317	-0.0891396	0.0478754	0.225469	14.259	-0.13	0.08	0.374684	no
YKL105C	SEG2	11	239185	242583	C		Eisosome component; likely plays only a minor role in eisosome assembly; shown to interact with Seg1p by affinity purification and mass spec; SWAT-GFP and mCherry fusion proteins localize to the cell periphery; similar to <i>A. gossypii</i> SEG gene which is important for stabilizing eisosomes; SEG2 has a paralog, SEG1, that arose from the whole genome duplication	11.3408	0.0459277	0.257109	0.560267	12.044	-0.13	0.2	0.571744	no
YKL159C	RCN1	11	153816	154451	C		Protein involved in calcineurin regulation during calcium signaling; has similarity to H. sapiens DSCR1 which is found in the Down Syndrome candidate region	8.6356	0.0158854	0.785507	0.91547	11.496	-0.13	0.39	0.735688	no
YKR001C	VPS1	11	440608	442722	C	dynamin-like GTPase VPS1|VPT26|VPL1|SPO15|LAM1|GRD1	Dynamin-like GTPase required for vacuolar sorting; also involved in actin cytoskeleton organization, endocytosis, late Golgi-retention of some proteins, regulation of peroxisome biogenesis	13.7075	-0.00839719	0.783727	0.91483	14.07	-0.13	0.02	0.171523	no
YLR032W	RAD5	12	204991	208500	W	DNA helicase RAD5|SNM2|REV2	DNA helicase/Ubiquitin ligase; involved in error-free DNA damage tolerance (DDT), replication fork regression during postreplication repair by template switching, error-prone translesion synthesis; promotes synthesis of free and PCNA-bound polyubiquitin chains by Ubc13p-Mms2p; forms nuclear foci upon DNA replication stress; associates with native telomeres, cooperates with homologous recombinatio…	11.4674	-3.29941e-05	0.9992	0.999682	11.673	-0.13	0.24	0.618507	no
YLR245C	CDD1	12	626502	626930	C	cytidine deaminase	Cytidine deaminase; catalyzes the modification of cytidine to uridine in vitro but native RNA substrates have not been identified, localizes to both the nucleus and cytoplasm	8.20413	-0.140034	0.013523	0.103199	13.115	-0.13	0.12	0.456388	no
YLR249W	YEF3	12	636780	639914	W	translation elongation factor EF-3|EF-3|eEF3|TEF3	Translation elongation factor 3; contains two ABC cassettes; binds and hydrolyzes ATP; YEF3 has a paralog, HEF3, that arose from the whole genome duplication	17.916	-0.0595224	0.0302413	0.170962	13.422	-0.13	0.96	0.981991	no
YML111W	BUL2	13	46942	49704	W	ubiquitin-ubiquitin ligase BUL2	Component of the Rsp5p E3-ubiquitin ligase complex; involved in intracellular amino acid permease sorting, functions in heat shock element mediated gene expression, essential for growth in stress conditions; BUL2 has a paralog, BUL1, that arose from the whole genome duplication	11.7574	-0.00496544	0.89763	0.961448	13.397	-0.13	0.12	0.456388	no
YMR016C	SOK2	13	303236	305593	C		Nuclear protein that negatively regulates pseudohyphal differentiation; plays a regulatory role in the cyclic AMP (cAMP)-dependent protein kinase (PKA) signal transduction pathway; relocalizes to the cytosol in response to hypoxia; SOK2 has a paralog, PHD1, that arose from the whole genome duplication	11.8818	-0.0253704	0.557853	0.796637	11.932	-0.13	0.018	0.159658	no
YMR125W	STO1	13	517539	520446	W	SUT1|CBP80|GCR3|CBC1	Large subunit of the nuclear mRNA cap-binding protein complex; interacts with Npl3p to carry nuclear poly(A)+ mRNA to cytoplasm; also involved in nuclear mRNA degradation and telomere maintenance; orthologous to mammalian CBP80	13.3128	0.0370074	0.233769	0.535993	13.248	-0.13	0.11	0.438983	no
YNL281W	HCH1	14	108467	108928	W		Heat shock protein regulator; binds to Hsp90p and may stimulate ATPase activity; originally identified as a high-copy number suppressor of a HSP90 loss-of-function mutation; role in regulating Hsp90 inhibitor drug sensitivity; GFP-fusion protein localizes to the cytoplasm and nucleus; protein abundance increases in response to DNA replication stress	12.0303	-0.0554796	0.142925	0.416865	14.116	-0.13	0.8	0.938406	no
YNR047W	FPK1	14	708523	711204	W	serine/threonine protein kinase FPK1	Ser/Thr protein kinase; phosphorylates several aminophospholipid translocase family members, regulating phospholipid translocation and membrane asymmetry; phosphorylates and inhibits upstream inhibitory kinase, Ypk1p; localizes to the cytoplasm, early endosome/TGN compartments and thplasma membrane; localizes to the shmoo tip where it has a redundant role in the cellular response to mating pherom…	9.42616	0.109452	0.0287502	0.165015	12.07	-0.13	0.48	0.8	no
YOR133W	EFT1	15	575098	577626	W	elongation factor 2	Elongation factor 2 (EF-2), also encoded by EFT2; catalyzes ribosomal translocation during protein synthesis; contains diphthamide, the unique posttranslationally modified histidine residue specifically ADP-ribosylated by diphtheria toxin; EFT1 has a paralog, EFT2, that arose from the whole genome duplication	16.6559	-0.0655786	0.0467584	0.222576	13.467	-0.13	0.001	0.0181119	no
YOR286W	RDL2	15	850280	850729	W	thiosulfate sulfurtransferase RDL2|AIM42|FMP31	Protein with rhodanese activity; contains a rhodanese-like domain similar to Rdl1p, Uba4p, Tum1p, and Ych1p; overexpression causes a cell cycle delay; null mutant displays elevated frequency of mitochondrial genome loss	10.9624	-0.00663497	0.875765	0.955013	15.338	-0.13	0.28	0.649821	no
YPL038W	MET31	16	480535	481068	W		Zinc-finger DNA-binding transcription factor; targets strong transcriptional activator Met4p to promoters of sulfur metabolic genes; involved in transcriptional regulation of the methionine biosynthetic genes; feedforward loop controlling expression of MET32 and the lack of such a loop for MET31 may account for the differential actions of Met31p and Met32p; MET31 has a paralog, MET32, that arose …	9.99794	-0.0344541	0.51254	0.766853	13.463	-0.13	0.3	0.669251	no
YAL020C	ATS1	1	113614	114615	C	KTI13|FUN28	Protein required for modification of wobble nucleosides in tRNA; acts with Elongator complex, Kti11p, and Kti12p; has a potential role in regulatory interactions between microtubules and the cell cycle; forms a stable heterodimer with Kti11p	10.4657	-0.0407586	0.286273	0.589605	13.806	-0.12	0.22	0.594161	no
YBR017C	KAP104	2	270947	273703	C		Transportin or cytosolic karyopherin beta 2; functions in the rg-nuclear localization signal-mediated nuclear import/reimport of mRNA-binding proteins Nab2p and Hrp1p; regulates asymmetric protein synthesis in daughter cells during mitosis	13.2937	-0.00376987	0.890525	0.959014	13.293	-0.12	0.21	0.586731	no
YBR086C	IST2	2	420201	423041	C		Cortical ER protein involved in ER-plasma membrane tethering; one of 6 proteins (Ist2p, Scs2p, Scs22p, Tcb1p, Tcb2p, Tcb3p) that connect ER to the plasma membrane (PM) and regulate PM phosphatidylinositol-4-phosphate (PI4P) levels by controlling access of Sac1p phosphatase to its substrate PI4P in the PM; localizes to the mother cell in small-budded cells and to the bud in medium- and large-budde…	13.8049	-0.000677984	0.987749	0.994781	12.839	-0.12	0.034	0.230524	no
YBR094W	PBY1	2	432036	434297	W	putative tubulin tyrosine ligase	Putative tubulin tyrosine ligase associated with P-bodies; may have a role in mRNA metabolism; yeast knockout collection strain identified as a pby1 null mutant is actually wild-type for PBY1 and deleted for mms4	11.6892	-0.00959995	0.745562	0.899141	12.968	-0.12	0.87	0.957629	no
YDR224C	HTB1	4	914317	914712	C	histone H2B|SPT12	Histone H2B; core histone protein required for chromatin assembly and chromosome function; nearly identical to HTB2; Rad6p-Bre1p-Lge1p mediated ubiquitination regulates reassembly after DNA replication, transcriptional activation, meiotic DSB formation and H3 methylation	14.2044	-0.0783369	0.0207093	0.135904	13.919	-0.12	0.92	0.973366	no
YEL013W	VAC8	5	128825	130561	W	protein anchor VAC8|YEB3	Phosphorylated and palmitoylated vacuolar membrane protein; interacts with Atg13p, required for the cytoplasm-to-vacuole targeting (Cvt) pathway; interacts with Nvj1p to form nucleus-vacuole junctions	12.1726	0.0516745	0.0918949	0.327118	13.735	-0.12	0.033	0.229758	no
YEL043W	YEL043W	5	70478	73348	W		Predicted cytoskeleton protein involved in intracellular signaling; based on quantitative analysis of protein-protein interaction maps; may interact with ribosomes, based on co-purification studies; contains fibronectin type III domain fold	12.2886	-0.015115	0.7344	0.895277	10.668	-0.12	0.47	0.794582	no
YER164W	CHD1	5	505392	509798	W	chromatin-remodeling ATPase CHD1	Chromatin remodeler that regulates various aspects of transcription; acts in in conjunction with Isw1b to regulate chromatin structure and maintain chromatin integrity during transcription elongation by RNAP II by preventing trans-histone exchange over coding regions; contains a chromo domain, a helicase domain and a DNA-binding domain; component of both the SAGA and SLIK complexes	12.3568	0.0760612	0.0707874	0.281147	12.984	-0.12	0.011	0.113056	no
YGL187C	COX4	7	149704	150171	C	cytochrome c oxidase subunit IV	Subunit IV of cytochrome c oxidase; the terminal member of the mitochondrial inner membrane electron transport chain; precursor N-terminal 25 residues are cleaved during mitochondrial import; phosphorylated; spermidine enhances translation	10.9529	-0.127815	0.0150496	0.110897	12.755	-0.12	0.14	0.488679	no
YHR041C	SRB2	8	189131	189864	C	MED20|HRS2	Subunit of the RNA polymerase II mediator complex; associates with core polymerase subunits to form the RNA polymerase II holoenzyme; general transcription factor involved in telomere maintenance	10.3231	-0.0867852	0.0329189	0.179742	14.267	-0.12	0.32	0.685525	no
YIL109C	SEC24	9	157385	160165	C	COPII subunit SEC24|ANU1	Component of the Sec23p-Sec24p heterodimer of the COPII vesicle coat; required for cargo selection during vesicle formation in ER to Golgi transport; homologous to Sfb3p; SEC24 has a paralog, SFB2, that arose from the whole genome duplication	13.2942	-0.0581691	0.0798706	0.302206	12.772	-0.12	0.2	0.571744	no
YJR117W	STE24	10	642007	643368	W	zinc metalloprotease|PIO2|AFC1	Highly conserved zinc metalloprotease; functions in two steps of a-factor maturation, C-terminal CAAX proteolysis and the first step of N-terminal proteolytic processing; cleaves both isoprenylated and non-prenylated oligopeptides; contains multiple transmembrane spans; human homolog ZMPSTE24 implicated in mandibuloacral dysplasia (MAD), and can complement yeast null mutant	13.2227	0.0213925	0.525142	0.772346	13.845	-0.12	0.8	0.938406	no
YLR056W	ERG3	12	253861	254958	W	C-5 sterol desaturase|PSO6|SYR1	C-5 sterol desaturase; glycoprotein that catalyzes the introduction of a C-5(6) double bond into episterol, a precursor in ergosterol biosynthesis; transcriptionally down-regulated when ergosterol is in excess; mutants are viable, but cannot grow on non-fermentable carbon sources; substrate of HRD ubiquitin ligase; mutation is functionally complemented by human SC5D	14.1788	-0.0325168	0.252706	0.555755	13.655	-0.12	0.54	0.841516	no
YLR129W	DIP2	12	399657	402488	W	snoRNA-binding rRNA-processing protein DIP2|UTP12	Nucleolar protein; specifically associated with the U3 snoRNA, part of the large ribonucleoprotein complex known as the small subunit (SSU) processome, required for 18S rRNA biogenesis, part of the active pre-rRNA processing complex	13.5147	0.00752579	0.806171	0.923838	12.835	-0.12	0.27	0.64333	no
YLR253W	MCP2	12	642627	644336	W	MRX13	Mitochondrial protein of unknown function involved in lipid homeostasis; associates with mitochondrial ribosome; integral membrane protein that localizes to the mitochondrial inner membrane; involved in mitochondrial morphology; non-essential gene which interacts genetically with MDM10, and other members of the ERMES complex; transcription is periodic during the metabolic cycle; homologous to hum…	11.4288	-0.0404346	0.196323	0.494331	12.716	-0.12	0.4	0.743185	no
YLR438C-A	LSM3	12	1013909	1014178	C	U4/U6-U5 snRNP complex subunit LSM3|USS2|SMX4	Lsm (Like Sm) protein; part of heteroheptameric complexes (Lsm2p-7p and either Lsm1p or 8p): cytoplasmic Lsm1p complex involved in mRNA decay; nuclear Lsm8p complex part of U6 snRNP and possibly involved in processing tRNA, snoRNA, and rRNA; protein increases in abundance and relocalizes from nucleus to cytoplasmic foci upon DNA replication stress	10.4159	0.00467854	0.917327	0.972636	12.711	-0.12	0.77	0.925	no
YML086C	ALO1	13	95791	97371	C	D-arabinono-1,4-lactone oxidase	D-Arabinono-1,4-lactone oxidase; catalyzes the final step in biosynthesis of dehydro-D-arabinono-1,4-lactone, which is protective against oxidative stress	12.2802	-0.0898325	0.0122326	0.0963287	12.45	-0.12	0.029	0.215833	no
YMR080C	NAM7	13	426712	429627	C	SUT2|ATP-dependent RNA helicase NAM7|SUP113|UPF1|MOF4|IFS2	ATP-dependent RNA helicase of the SFI superfamily; involved in nonsense mediated mRNA decay; required for efficient translation termination at nonsense codons and targeting of NMD substrates to P-bodies; binds to the small ribosomal subunit via an interaction with Rps26; forms cytoplasmic foci upon DNA replication stress	12.9816	-0.00146526	0.964796	0.98699	12.656	-0.12	0.022	0.179182	no
YMR183C	SSO2	13	626921	627808	C	syntaxin	Plasma membrane t-SNARE; involved in fusion of secretory vesicles at the plasma membrane; syntaxin homolog that is functionally redundant with Sso1p; SSO2 has a paralog, SSO1, that arose from the whole genome duplication	12.3045	0.00206983	0.940789	0.979533	12.102	-0.12	0.17	0.530482	no
YMR237W	BCH1	13	743749	745923	W	exomer complex subunit	Member of the ChAPs family (Chs5p-Arf1p-binding proteins); members include Bch1p, Bch2p, Bud7p, and Chs6p; ChAPs family proteins form the exomer complex with Chs5p to mediate export of specific cargo proteins from the Golgi to the plasma membrane; interacts selectively with the activated, GTP-bound form of Arf1p; may interact with ribosomes; protein abundance increases and forms cytoplasmic foci …	12.5954	-0.0330145	0.369504	0.667507	12.632	-0.12	0.13	0.470909	no
YOR116C	RPO31	15	539763	544145	C	DNA-directed RNA polymerase III core subunit RPO31|C160|RPC160|RPC1	RNA polymerase III largest subunit C160; part of core enzyme; similar to bacterial beta-prime subunit and to RPA190 and RPO21	13.1632	-0.0195899	0.519279	0.770003	12.643	-0.12	0.043	0.262665	no
YPL249C	GYP5	16	76669	79353	C		GTPase-activating protein (GAP) for yeast Rab family members; involved in ER to Golgi trafficking; exhibits GAP activity toward Ypt1p that is stimulated by Gyl1p, also acts on Sec4p; interacts with Gyl1p, Rvs161p and Rvs167p; involved in recruiting Rvs167p to the bud tip during polarized growth; relocalizes from bud neck to cytoplasm upon DNA replication stress; GYP5 has a paralog, GYL1, that aro…	10.8845	-0.0350416	0.478706	0.747008	13.446	-0.12	0.13	0.470909	no
YAR042W	SWH1	1	192619	196185	W	oxysterol-binding protein related protein SWH1|OSH1|YAR044W	Protein similar to mammalian oxysterol-binding protein; contains ankyrin repeats and FFAT motif; interacts with ER anchor Scs2p at the nucleus-vacuole junction; regulated by sterol binding; SWH1 has a paralog, OSH2, that arose from the whole genome duplication	11.9279	-0.0101102	0.826284	0.933298	12.634	-0.11	0.26	0.635283	no
YBR092C	PHO3	2	427698	429101	C	acid phosphatase PHO3|phoC	Constitutively expressed acid phosphatase similar to Pho5p; brought to the cell surface by transport vesicles; hydrolyzes thiamin phosphates in the periplasmic space, increasing cellular thiamin uptake; expression is repressed by thiamin	14.1725	-0.0820886	0.0169382	0.119754	13.537	-0.11	0.77	0.925	no
YDR060W	MAK21	4	570649	573726	W	RNA-binding ribosome biosynthesis protein MAK21|NOC1	Constituent of 66S pre-ribosomal particles; required for large (60S) ribosomal subunit biogenesis; acts as part of a Mak21p-Noc2p-Rrp5p module that associates with nascent pre-rRNA during transcription and has a role in bigenesis of the large ribosomal subunit; involved in nuclear export of pre-ribosomes; required for maintenance of dsRNA virus; homolog of human CAATT-binding protein	14.4025	0.0222145	0.464253	0.736839	14.381	-0.11	0.14	0.488679	no
YDR398W	UTP5	4	1267471	1269402	W		Subunit of U3-containing Small Subunit (SSU) processome complex; involved in production of 18S rRNA and assembly of small ribosomal subunit	13.389	-0.0509371	0.144092	0.418256	15.265	-0.11	0.23	0.607238	no
YEL002C	WBP1	5	148722	150014	C	dolichyl-diphosphooligosaccharide-protein glycotransferase	Beta subunit of the oligosaccharyl transferase glycoprotein complex; required for N-linked glycosylation of proteins in the endoplasmic reticulum; human homolog DDOST can complement yeast growth defect during down-regulation of yeast gene	13.6133	-0.00211285	0.936236	0.977536	13.894	-0.11	0.27	0.64333	no
YFL007W	BLM10	6	123479	129910	W	YFL006W	Proteasome activator; binds the core proteasome (CP) and stimulates proteasome-mediated protein degradation by inducing gate opening; required for sequestering CP into proteasome storage granule (PSG) during quiescent phase and for nuclear import of CP in proliferating cells; required for resistance to bleomycin, may be involved in protecting against oxidative damage; similar to mammalian PA200	13.0456	-0.0177135	0.617747	0.834734	12.7	-0.11	0.2	0.571744	no
YGR083C	GCD2	7	644860	646815	C	translation initiation factor eIF2B subunit delta|GCD12	Delta subunit of the translation initiation factor eIF2B; the guanine-nucleotide exchange factor for eIF2; activity subsequently regulated by phosphorylated eIF2; first identified as a negative regulator of GCN4 expression	13.3901	0.00655018	0.796027	0.918733	12.55	-0.11	0.14	0.488679	no
YGR200C	ELP2	7	899904	902270	C	Elongator subunit ELP2|KTI3|TOT2	Subunit of Elongator complex; binds to microtubules via conserved alkaline residues; has two seven-bladed WD40 &	13.3843	-0.0569226	0.0204321	0.134692	12.663	-0.11	0.55	0.84994	no
YHR110W	ERP5	8	332282	332920	W		Protein with similarity to Emp24p and Erv25p; member of the p24 family involved in ER to Golgi transport	11.1617	-0.0150892	0.670621	0.865265	11.085	-0.11	0.32	0.685525	no
YIL078W	THS1	9	212499	214703	W	threonine--tRNA ligase THS1	Threonyl-tRNA synthetase; essential cytoplasmic protein; human homolog TARS can complement yeast null mutant	15.6539	-0.0115692	0.628223	0.841383	14.58	-0.11	0.021	0.174887	no
YJL012C	VTC4	10	411234	413399	C	YJL012C-A|PHM3	Vacuolar membrane polyphosphate polymerase; subunit of the vacuolar transporter chaperone (VTC) complex involved in synthesis and transfer of polyP to the vacuole; regulates membrane trafficking; role in non-autophagic vacuolar fusion; protein abundance increases in response to DNA replication stress	12.6308	-0.0446804	0.0960225	0.336342	14.124	-0.11	0.026	0.199231	no
YJR024C	MDE1	10	470230	470964	C	methylthioribulose 1-phosphate dehydratase MDE1	5'-methylthioribulose-1-phosphate dehydratase; acts in the methionine salvage pathway; potential Smt3p sumoylation substrate; expression downregulated by caspofungin and deletion mutant is caspofungin resistant	11.6798	-0.0232239	0.510296	0.766615	13.686	-0.11	0.038	0.245436	no
YKL006C-A	SFT1	11	430198	430632	C		Intra-Golgi v-SNARE; required for transport of proteins between an early and a later Golgi compartment	9.30288	0.00472607	0.926498	0.974592	12.221	-0.11	0.42	0.758577	no
YKL104C	GFA1	11	243220	245373	C	glutamine--fructose-6-phosphate transaminase (isomerizing) GFA1	Glutamine-fructose-6-phosphate amidotransferase; catalyzes the formation of glucosamine-6-P and glutamate from fructose-6-P and glutamine in the first step of chitin biosynthesis; GFA1 has a paralogous region, comprising ORFs YMR084W-YMR085W, that arose from the whole genome duplication	13.5425	-0.026449	0.437935	0.721409	13.035	-0.11	0.24	0.618507	no
YLR038C	COX12	12	224921	225172	C	cytochrome c oxidase subunit VIb	Subunit VIb of cytochrome c oxidase; cytochrome c oxidase is also known as respiratory Complex IV and is the terminal member of the mitochondrial inner membrane electron transport chain; required for assembly of cytochrome c oxidase but not required for activity after assembly; phosphorylated; easily released from the intermembrane space, suggesting a loose association with Complex IV	9.54053	-0.144777	0.0157446	0.114551	13.236	-0.11	0.38	0.729577	no
YLR167W	RPS31	12	498947	499405	W	eS31|ubiquitin-ribosomal 40S subunit protein S31 fusion protein|S31e|UB13|YS24|S37|S31|UBI3|RPS37	Fusion protein cleaved to yield ribosomal protein S31 and ubiquitin; ubiquitin may facilitate assembly of the ribosomal protein into ribosomes; interacts genetically with translation factor eIF2B; homologous to mammalian ribosomal protein S27A, no bacterial homolog	16.8694	-0.0997977	0.0142166	0.106561	13.032	-0.11	0.78	0.930968	no
YLR262C	YPT6	12	668244	668891	C	Rab family GTPase YPT6	Rab family GTPase; required for endosome-to-Golgii, intra-Golgi retrograde, and retrograde Golgi-to-ER transport; temporarily at the Golgi, dissociating into the cytosol on arrival of the late Golgi GTPase Ypt32p; Golgi-localized form is GTP bound, while cytosolic form is GDP-bound; required for delivery of Atg9p to the phagophore assembly site during autophagy under heat stress, with Ypt6p for s…	10.8144	-0.0276427	0.466072	0.737485	13.242	-0.11	0.32	0.685525	no
YLR306W	UBC12	12	744151	744851	W	NEDD8-conjugating protein UBC12	Enzyme that mediates the conjugation of Rub1p; a ubiquitin-like protein, to other proteins; related to E2 ubiquitin-conjugating enzymes	9.07517	0.010381	0.846083	0.940738	10.768	-0.11	0.37	0.725985	no
YLR384C	IKI3	12	888851	892900	C	Elongator subunit IKI3|KTI7|TOT1|ELP1	Subunit of Elongator complex; Elongator is required for modification of wobble nucleosides in tRNA; maintains structural integrity of Elongator; homolog of human IKAP, mutations in which cause familial dysautonomia (FD)	13.6636	-0.045279	0.0660575	0.268625	12.125	-0.11	0.1	0.415064	no
YLR388W	RPS29A	12	898651	898821	W	uS14|ribosomal 40S subunit protein S29A|S14|YS29|S36A|S29A|YS29A	Protein component of the small (40S) ribosomal subunit; homologous to mammalian ribosomal protein S29 and bacterial S14; RPS29A has a paralog, RPS29B, that arose from the whole genome duplication	7.1633	-0.182938	0.00480702	0.0487617	15.478	-0.11	0.048	0.283189	no
YNL021W	HDA1	14	593227	595347	W	histone deacetylase HDA1	Putative catalytic subunit of a class II histone deacetylase complex; role in azole resistance via Hsp90p, and in the heat shock response; Hda1p interacts with the Hda2p-Hda3p subcomplex to form an active tetramer; deletion increases histone H2B, H3 and H4 acetylation; other members of the HDA1 histone deacetylase complex are Hda2p and Hda3p	11.745	0.0237603	0.481636	0.748842	12.392	-0.11	0.093	0.408254	no
YNL098C	RAS2	14	439602	440570	C	Ras family GTPase RAS2|TSL7|GLC5|CYR3|CTN5	GTP-binding protein; regulates nitrogen starvation response, sporulation, and filamentous growth; farnesylation and palmitoylation required for activity and localization to plasma membrane; homolog of mammalian Ras proto-oncogenes; RAS2 has a paralog, RAS1, that arose from the whole genome duplication	13.3608	-0.0101073	0.714504	0.887118	12.606	-0.11	0.012	0.121882	no
YNL256W	FOL1	14	164623	167097	W	trifunctional dihydropteroate synthetase/dihydrohydroxymethylpterin pyrophosphokinase/dihydroneopterin aldolase FOL1	Multifunctional enzyme of the folic acid biosynthesis pathway; has dihydropteroate synthetase, dihydro-6-hydroxymethylpterin pyrophosphokinase, and dihydroneopterin aldolase activities	12.8708	-0.00186563	0.937024	0.977714	13.802	-0.11	0.17	0.530482	no
YOR224C	RPB8	15	760825	761265	C	DNA-directed RNA polymerase core subunit RPB8|ABC14.5	RNA polymerase subunit ABC14.5; common to RNA polymerases I, II, and III	12.7864	-0.0797495	0.0429933	0.212151	14.052	-0.11	0.19	0.560478	no
YOR229W	WTM2	15	768409	769812	W	transcriptional modulator	Transcriptional modulator; involved in regulation of meiosis, silencing, and expression of RNR genes; involved in response to replication stress; contains WD repeats; relocalizes to the cytosol in response to hypoxia; WTM2 has a paralog, UME1, that arose from the whole genome duplication	10.2521	-0.0857254	0.027543	0.161251	12.491	-0.11	0.1	0.415064	no
YOR322C	LDB19	15	918606	921062	C	ART1	Alpha-arrestin involved in ubiquitin-dependent endocytosis; regulates endocytosis of plasma membrane proteins by recruiting the ubiquitin ligase Rsp5p to its targets; involved in the basal internalization and turnover of alpha-factor receptor Ste2p; recruits ubiquitin ligase Rsp5p to Ste2p via its 2 PPXY motifs; inhibited by Npr1p-mediated phosphorylation, which affects translocation between the …	12.0592	0.0217486	0.517319	0.768639	11.581	-0.11	0.59	0.86431	no
YPL210C	SRP72	16	154290	156212	C	signal recognition particle subunit SRP72	Core component of the signal recognition particle (SRP); the SRP is a ribonucleoprotein (RNP) complex that functions in targeting nascent secretory proteins to the endoplasmic reticulum (ER) membrane	13.2141	0.0255175	0.310551	0.617642	11.206	-0.11	0.27	0.64333	no
YBL007C	SLA1	2	212632	216366	C	cytoskeletal protein-binding protein SLA1	Cytoskeletal protein binding protein; required for assembly of the cortical actin cytoskeleton; interacts with proteins regulating actin dynamics and proteins required for endocytosis; found in the nucleus and cell cortex; has 3 SH3 domains	13.262	0.00161687	0.963317	0.986458	13.452	-0.1	0.008	0.088547	no
YBL105C	PKC1	2	14241	17696	C	protein kinase C|CLY7|CLY5|STT1|HPO2|CLY15	Protein serine/threonine kinase; essential for cell wall remodeling during growth; localized to sites of polarized growth and the mother-daughter bud neck; homolog of the alpha, beta, and gamma isoforms of mammalian protein kinase C (PKC)	12.2631	0.0554794	0.20001	0.499375	12.161	-0.1	0.1	0.415064	no
YBR024W	SCO2	2	289445	290350	W	putative thioredoxin peroxidase SCO2	Protein anchored to mitochondrial inner membrane; may have a redundant function with Sco1p in delivery of copper to cytochrome c oxidase; interacts with Cox2p; SCO2 has a paralog, SCO1, that arose from the whole genome duplication	9.80662	-0.0278801	0.51518	0.7677	12.908	-0.1	0.1	0.415064	no
YBR081C	SPT7	2	401253	405251	C	SAGA histone acetyltransferase complex subunit SPT7|GIT2	Subunit of the SAGA transcriptional regulatory complex; involved in proper assembly of the complex; also present as a C-terminally truncated form in the SLIK/SALSA transcriptional regulatory complex	12.3327	0.0795721	0.02513	0.154078	12.838	-0.1	0.23	0.607238	no
YBR244W	GPX2	2	707528	708016	W	glutathione peroxidase GPX2|AMI1	Phospholipid hydroperoxide glutathione peroxidase; protects cells from phospholipid hydroperoxides and nonphospholipid peroxides during oxidative stress; induced by glucose starvation; protein abundance increases in response to DNA replication stress	10.9424	-0.0315289	0.379747	0.677217	13.66	-0.1	0.89	0.962463	no
YBR245C	ISW1	2	708150	711539	C	chromatin-remodeling ATPase ISW1|SGN2	ATPase subunit of imitation-switch (ISWI) class chromatin remodelers; with Ioc3p forms Isw1a complex involved in repression of transcription initiation; with Ioc2p and Ioc4p forms Isw1b complex involved in regulation of transcription elongation; Isw1b recruited to ORFs by H3K36 methylation and acts with Chd1p to prevent trans-histone exchange over coding regions; Isw1p import into nucleus depends…	12.4525	0.0343426	0.441705	0.723189	12.882	-0.1	0.18	0.549764	no
YDL051W	LHP1	4	363952	364779	W	YLA1|LAH1	RNA binding protein required for maturation of tRNA and U6 snRNA; acts as a molecular chaperone for RNAs transcribed by polymerase III; homologous to human La (SS-B) autoantigen	13.4893	-0.00973134	0.800439	0.920934	13.228	-0.1	0.15	0.507843	no
YDL058W	USO1	4	345665	351037	W	INT1	Essential protein involved in vesicle-mediated ER to Golgi transport; binds membranes and functions during vesicle docking to the Golgi; required for assembly of the ER-to-Golgi SNARE complex	12.8638	0.0717051	0.0622439	0.259199	12.97	-0.1	0.13	0.470909	no
YDR129C	SAC6	4	713340	715379	C	fimbrin|ABP67	Fimbrin, actin-bundling protein; cooperates with Scp1p in organization and maintenance of the actin cytoskeleton; phosphorylated by Cdc28p/Clb2p in metaphase on T103, to regulate conformation, and modulate actin filament binding affinity and actin cable dynamics; relocalizes from the plasma membrane to the cytoplasm upon DNA replication stress; human homologs PLS3 and LCP1 implicated in spinocere…	14.0804	0.0134272	0.666164	0.863361	14.35	-0.1	0.25	0.628031	no
YDR324C	UTP4	4	1114433	1116763	C		Subunit of U3-containing 90S preribosome and SSU processome complexes; involved in production of 18S rRNA and assembly of small ribosomal subunit; member of t-Utp subcomplex involved with transcription of 35S rRNA transcript; Small Subunit processome is also known as SSU processome	13.5254	-0.00174949	0.951282	0.982652	12.508	-0.1	0.45	0.78169	no
YDR452W	PPN1	4	1362878	1364902	W	endopolyphosphatase|PHM5	Dual endo- and exopolyphosphatase with a role in phosphate metabolism; acts as both an endopolyphosphatase cleaving long chains of polyphosphate distributively to generate shorter polymer chains and as an exopolyphosphatase catalyzing the hydrolysis of terminal phosphate from polyphosphate; localizes to the vacuole, nucleus and cytosol; functions as a homodimer; relocalizes from vacuole to cytopl…	12.9373	0.0717225	0.0192364	0.129329	13.75	-0.1	0.28	0.649821	no
YGL120C	PRP43	7	281634	283937	C	DEAH-box ATP-dependent RNA helicase PRP43|JA1	RNA helicase in the DEAH-box family; functions in both RNA polymerase I and polymerase II transcript metabolism; catalyzes removal of U2, U5, and U6 snRNPs from the postsplicing lariat-intron ribonucleoprotein complex; required for efficient biogenesis of both small- and large-subunit rRNAs; acts with Sqs1p to promote 20S to 18S rRNA processing catalyzed by endonuclease Nob1p	13.872	-0.0416846	0.219074	0.519377	14.142	-0.1	0.22	0.594161	no
YGL150C	INO80	7	221104	225573	C	chromatin-remodeling ATPase INO80	ATPase and nucleosome spacing factor; subunit of complex containing actin and actin-related proteins that has chromatin remodeling activity and 3' to 5' DNA helicase activity in vitro; promotes nucleosome shifts in the 3 prime direction; has a role in modulating stress gene transcription	12.9751	0.0604861	0.0664534	0.269894	12.885	-0.1	0.24	0.618507	no
YGL222C	EDC1	7	80659	81186	C		RNA-binding protein that activates mRNA decapping directly; binds to mRNA substrate and enhances activity of decapping proteins Dcp1p and Dcp2p; has a role in translation during heat stress; protein becomes more abundant and forms cytoplasmic foci in response to DNA replication stress; EDC1 has a paralog, EDC2, that arose from the whole genome duplication	9.49701	0.0360165	0.525904	0.772875	14.168	-0.1	0.2	0.571744	no
YHR008C	SOD2	8	122889	123590	C	superoxide dismutase SOD2	Mitochondrial manganese superoxide dismutase; protects cells against oxygen toxicity and oxidative stress; human mitochondrial SOD2 can complement a yeast null mutant and human cytoplasmic SOD1 can also complement when targeted to the mitochondrial matrix	12.5106	-0.0950932	0.0378709	0.197595	14.04	-0.1	0.35	0.714905	no
YHR087W	RTC3	8	280820	281155	W	HGI1	Protein of unknown function involved in RNA metabolism; has structural similarity to SBDS, the human protein mutated in Shwachman-Diamond Syndrome (the yeast SBDS ortholog = SDO1); null mutation suppresses cdc13-1 temperature sensitivity; protein abundance increases in response to DNA replication stress	10.0105	-8.07054e-05	0.998933	0.999628	13.964	-0.1	0.93	0.975972	no
YHR143W-A	RPC10	8	387233	387445	W	DNA-directed RNA polymerase core subunit RPC10|ABC10-alpha|RPB12	RNA polymerase subunit ABC10-alpha, found in RNA pol I, II, and III; relocalizes from nucleolus to cytoplasm upon DNA replication stress	10.8447	-0.0844037	0.0674203	0.271711	13.955	-0.1	0.15	0.507843	no
YJL087C	TRL1	10	270002	272485	C	tRNA ligase|RLG1|LIG1	tRNA ligase; required for tRNA splicing and for both splicing and translation of HAC1 mRNA in the UPR; has phosphodiesterase, polynucleotide kinase, and ligase activities; localized at the inner nuclear envelope and partially to polysomes	11.6565	0.051483	0.117821	0.374825	12.741	-0.1	0.11	0.438983	no
YJR105W	ADO1	10	623581	624603	W	adenosine kinase	Adenosine kinase; required for the utilization of S-adenosylmethionine (AdoMet); may be involved in recycling adenosine produced through the methyl cycle	14.9908	-0.127529	0.00160417	0.0217224	13.474	-0.1	0.019	0.165134	no
YKL087C	CYT2	11	277189	277863	C	cytochrome c1 heme lyase CYT2|CC1HL	Cytochrome c1 heme lyase; involved in maturation of cytochrome c1, which is a subunit of the mitochondrial ubiquinol-cytochrome-c reductase; links heme covalently to apocytochrome c1; human homolog HCCS can complement yeast cyt2 null mutant	10.5275	0.038066	0.322975	0.629865	14.235	-0.1	0.11	0.438983	no
YKL167C	MRP49	11	133721	134134	C	mitochondrial 54S ribosomal protein MRP49	Mitochondrial ribosomal protein of the large subunit; not essential for mitochondrial translation	9.66236	-0.0035608	0.946452	0.982489	12.987	-0.1	0.35	0.714905	no
YKR068C	BET3	11	570328	570909	C	TRAPP complex core subunit BET3	Core component of transport protein particle (TRAPP) complexes I-III; TRAPP complexes are related multimeric guanine nucleotide-exchange factors for the GTPase Ypt1, regulating ER-Golgi traffic (TRAPPI), intra-Golgi traffic (TRAPPII), endosome-Golgi traffic (TRAPPII and III) and autophagy (TRAPPIII); hydrophilic homodimeric protein that acts in conjunction with SNARE proteins in targeting and fus…	11.0119	0.00667643	0.844955	0.940564	14.324	-0.1	0.2	0.571744	no
YLR187W	SKG3	12	524865	527945	W		Protein of unknown function; green fluorescent protein (GFP)-fusion protein localizes to the cell periphery, cytoplasm, bud, and bud neck; potential Cdc28p substrate; similar to Skg4p; relocalizes from bud neck to cytoplasm upon DNA replication stress; SKG3 has a paralog, CAF120, that arose from the whole genome duplication	9.97531	0.0624163	0.246927	0.549639	11.841	-0.1	0.082	0.380609	no
YML010W	SPT5	13	247677	250868	W	transcription elongation factor SPT5	Spt4p/5p (DSIF) transcription elongation factor complex subunit; the Spt4/5 complex binds to ssRNA in a sequence-specific manner, and in concert with RNAP I and II has multiple roles regulating transcriptional elongation, RNA processing, quality control, and transcription-coupled repair; interacts with DNA upstream of RNAPII and the non-template strand of the transcription bubble; Spt5p is the on…	13.6128	-0.0548427	0.0306587	0.171737	13.072	-0.1	0.001	0.0181119	no
YMR156C	TPP1	13	570300	571016	C	polynucleotide 3'-phosphatase	DNA 3'-phosphatase; functions in repair of endogenous damage of double-stranded DNA, activity is specific for removal of 3' phosphates at strand breaks; similar to the l-2-haloacid dehalogenase superfamily; homolog of human polynucleotide kinase/3'-phosphatase	8.75258	-0.056467	0.272564	0.575635	11.91	-0.1	0.27	0.64333	no
YMR202W	ERG2	13	667537	668205	W	C-8 sterol isomerase ERG2|END11	C-8 sterol isomerase; catalyzes isomerization of delta-8 double bond to delta-7 position at an intermediate step in ergosterol biosynthesis; transcriptionally down-regulated when ergosterol is in excess; mutation is functionally complemented by human EBP	13.3546	-0.0265354	0.513181	0.766853	11.523	-0.1	0.66	0.885699	no
YMR294W	JNM1	13	856966	858087	W	PAC3|INS1	Component of the yeast dynactin complex; consisting of Nip100p, Jnm1p, and Arp1p; required for proper nuclear migration and spindle partitioning during mitotic anaphase B	10.3199	0.0555409	0.124735	0.387694	12.277	-0.1	0.16	0.51995	no
YMR309C	NIP1	13	892988	895426	C	translation initiation factor eIF3 core subunit c	eIF3c subunit of the eukaryotic translation initiation factor 3 (eIF3); involved in the assembly of preinitiation complex and start codon selection; eIF3 is also involved in programmed stop codon readthrough	14.0536	0.011071	0.744616	0.899141	13.377	-0.1	0.12	0.456388	no
YNL192W	CHS1	14	276502	279897	W	chitin synthase CHS1|USA4	Chitin synthase I; requires activation from zymogenic form in order to catalyze the transfer of N-acetylglucosamine (GlcNAc) to chitin; required for repairing the chitin septum during cytokinesis; transcription activated by mating factor	13.3288	0.102112	0.00733291	0.0667713	12.022	-0.1	0.37	0.725985	no
YNL243W	SLA2	14	188051	190957	W	MOP2|END4	Adaptor protein that links actin to clathrin and endocytosis; involved in membrane cytoskeleton assembly and cell polarization; present in the actin cortical patch of the emerging bud tip; dimer in vivo	13.3468	-0.00723138	0.829051	0.934551	12.558	-0.1	0.13	0.470909	no
YNL297C	MON2	14	71673	76583	C	YSL2	Protein with a role in endocytosis and vacuole integrity; peripheral membrane protein; interacts with and negatively regulates Arl1p; localizes to the endosome; member of the Sec7p family of proteins	12.0716	0.0497353	0.232955	0.535185	14.817	-0.1	0.16	0.51995	no
YNR021W	YNR021W	14	668377	669591	W		Putative protein of unknown function; green fluorescent protein (GFP)-fusion protein localizes to the endoplasmic reticulum; YNR021W is not an essential gene	13.6282	0.00716712	0.807582	0.924639	14.58	-0.1	0.34	0.701673	no
YOL031C	SIL1	15	266264	267529	C	SLS1	Nucleotide exchange factor for the ER lumenal Hsp70 chaperone Kar2p; required for protein translocation into the endoplasmic reticulum (ER); homolog of Yarrowia lipolytica SLS1; GrpE-like protein	11.5678	-0.00484716	0.884438	0.958047	13.945	-0.1	0.022	0.179182	no
YOL038W	PRE6	15	255337	256101	W	proteasome core particle subunit alpha 4	Alpha 4 subunit of the 20S proteasome; may replace alpha 3 subunit (Pre9p) under stress conditions to create a more active proteasomal isoform; GFP-fusion protein relocates from cytosol to the mitochondrial surface upon oxidative stress	12.8974	-0.0680566	0.0107631	0.0877902	14.317	-0.1	0.065	0.333366	no
YOL052C	SPE2	15	232446	233636	C	adenosylmethionine decarboxylase SPE2	S-adenosylmethionine decarboxylase; required for the biosynthesis of spermidine and spermine; cells lacking Spe2p require spermine or spermidine for growth in the presence of oxygen but not when grown anaerobically	11.977	-0.0508772	0.134106	0.403769	12.946	-0.1	0.014	0.13683	no
YOR109W	INP53	15	525278	528601	W	phosphatidylinositol-3-/phosphoinositide 5-phosphatase INP53|SOP2|SJL3	Polyphosphatidylinositol phosphatase; dephosphorylates multiple phosphatidylinositol phosphates; involved in trans Golgi network-to-early endosome pathway; hyperosmotic stress causes translocation to actin patches; contains Sac1 and 5-ptase domains; INP53 has a paralog, INP52, that arose from the whole genome duplication	12.4547	-0.0144166	0.70104	0.879164	12.885	-0.1	0.052	0.296	no
YOR386W	PHR1	15	1066839	1068536	W	deoxyribodipyrimidine photo-lyase PHR1	DNA photolyase involved in photoreactivation; repairs pyrimidine dimers in the presence of visible light; induced by DNA damage; regulated by transcriptional repressor Rph1p	9.33323	0.128803	0.0141873	0.106561	15.608	-0.1	0.65	0.879112	no
YPL243W	SRP68	16	88517	90316	W	signal recognition particle subunit SRP68	Core component of the signal recognition particle (SRP) complex; SRP complex functions in targeting nascent secretory proteins to the endoplasmic reticulum (ER) membrane; relocalizes from cytoplasm to the nuclear periphery upon DNA replication stress	13.2418	0.0374626	0.147236	0.422195	13.956	-0.1	0.22	0.594161	no
YCR011C	ADP1	3	133724	136873	C	putative ATP-dependent permease ADP1	Putative ATP-dependent permease of the ABC transporter family	12.7478	-0.0316481	0.367136	0.66513	13.154	-0.09	0.059	0.313135	no
YDR063W	AIM7	4	578663	579112	W	GMF1|GMF	Protein that interacts with Arp2/3 complex; interacts with Arp2/3 complex to stimulate actin filament debranching and inhibit actin nucleation; has similarity to Cof1p and also to human glia maturation factor (GMF); null mutant displays elevated mitochondrial genome loss	11.0146	0.014121	0.731851	0.894416	15.872	-0.09	0.43	0.76754	no
YDR457W	TOM1	4	1369790	1379596	W	E3 ubiquitin-protein ligase TOM1	E3 ubiquitin ligase of the hect-domain class; has a role in mRNA export from the nucleus and may regulate transcriptional coactivators; involved in degradation of excess histones; interacts with Dia2p and is required for Dia2p degradation; required to target Cdc6p for ubiquitin-mediated destruction during G1 phase	13.1881	0.0350478	0.401528	0.691647	12.569	-0.09	0.33	0.695443	no
YDR486C	VPS60	4	1427431	1428120	C	CHM5|MOS10	Protein involved in late endosome to vacuole transport; cytoplasmic and vacuolar membrane protein; required for normal filament maturation during pseudohyphal growth; may function in targeting cargo proteins for degradation; interacts with Vta1p	11.1597	-0.019137	0.559441	0.797716	11.824	-0.09	0.92	0.973366	no
YDR527W	RBA50	4	1491094	1492413	W		Protein involved in transcription; interacts with RNA polymerase II subunits Rpb2p, Rpb3, and Rpb11p; has similarity to human RPAP1	12.292	-0.0548542	0.106972	0.355235	14.197	-0.09	0.17	0.530482	no
YER057C	HMF1	5	270737	271126	C	putative isoleucine biosynthesis protein HMF1|HIG1	Member of the p14.5 protein family; functionally complements Mmf1p function when targeted to mitochondria; heat shock inducible; high-dosage growth inhibitor; forms a homotrimer in vitro; HMF1 has a paralog, MMF1, that arose from the whole genome duplication	11.7831	-0.0930151	0.0062644	0.0594189	15.041	-0.09	0.5	0.813442	no
YFL044C	OTU1	6	44655	45560	C	ubiquitin-specific protease OTU1|YOD1	Deubiquitylation enzyme that binds to the chaperone-ATPase Cdc48p; may contribute to regulation of protein degradation by deubiquitylating substrates that have been ubiquitylated by Ufd2p; member of the Ovarian Tumor (OTU) family; protein abundance increases in response to DNA replication stress	10.5292	-0.0194406	0.637225	0.847327	14.678	-0.09	0.15	0.507843	no
YGL027C	CWH41	7	443642	446143	C	DER7|GLS1	Processing alpha glucosidase I; ER type II integral membrane N-glycoprotein involved in assembly of cell wall beta 1,6 glucan and asparagine-linked protein glycosylation; also involved in ER protein quality control and sensing of ER stress	12.9126	0.0292656	0.251184	0.554468	13.211	-0.09	0.26	0.635283	no
YGR033C	TIM21	7	554248	554967	C	FMP17	Nonessential component of the TIM23 complex; interacts with the Translocase of the Outer Mitochondrial membrane (TOM complex) and with respiratory enzymes; may regulate the Translocase of the Inner Mitochondrial membrane (TIM23 complex) activity	11.6206	-0.0623434	0.0520573	0.234055	13.88	-0.09	0.11	0.438983	no
YGR042W	MTE1	7	579476	580291	W		Protein of unknown function; involved in maintenance of proper telomere length; green fluorescent protein (GFP)-fusion protein localizes to both the cytoplasm and the nucleus; forms nuclear foci upon DNA replication stress	10.0462	-0.0176826	0.660526	0.859834	12.691	-0.09	0.46	0.790577	no
YGR128C	UTP8	7	747950	750091	C		Nucleolar protein required for export of tRNAs from the nucleus; also copurifies with the small subunit (SSU) processome containing the U3 snoRNA that is involved in processing of pre-18S rRNA	13.4146	0.0360641	0.273962	0.576092	13.881	-0.09	0.71	0.900539	no
YGR162W	TIF4631	7	824059	826917	W	translation initiation factor eIF4G|eiF4G1	Translation initiation factor eIF4G; subunit of the mRNA cap-binding protein complex (eIF4F) that also contains eIF4E (Cdc33p); interacts with Pab1p and with eIF4A (Tif1p); also has a role in biogenesis of the large ribosomal subunit; TIF4631 has a paralog, TIF4632, that arose from the whole genome duplication	14.5695	-0.0136669	0.70963	0.883391	13.667	-0.09	0.0057	0.0736493	no
YGR280C	PXR1	7	1050910	1051725	C	telomerase inhibitor|PinX1|GNO1	Essential protein involved in rRNA and snoRNA maturation; competes with TLC1 RNA for binding to Est2p, suggesting a role in negative regulation of telomerase; human homolog inhibits telomerase; contains a G-patch RNA interacting domain	12.5069	-0.0338934	0.439166	0.721712	14.502	-0.09	0.032	0.22895	no
YHR141C	RPL42B	8	381990	382751	C	eL42|ribosomal 60S subunit protein L42B|L44e|YP44|YL27|L42B|L41B|MAK18	Ribosomal 60S subunit protein L42B; required for propagation of the killer toxin-encoding M1 double-stranded RNA satellite of the L-A double-stranded RNA virus; homologous to mammalian ribosomal protein L36A, no bacterial homolog; RPL42B has a paralog, RPL42A, that arose from the whole genome duplication	14.747	-0.101908	0.0235257	0.147324	15.016	-0.09	0.046	0.273885	no
YIL064W	EFM4	9	241943	242716	W	SEE1	Lysine methyltransferase; involved in the dimethylation of eEF1A (Tef1p/Tef2p) at lysine 316; sequence similarity to S-adenosylmethionine-dependent methyltransferases of the seven beta-strand family; role in vesicular transport	11.6162	-0.0809222	0.021023	0.137018	13.876	-0.09	0.77	0.925	no
YIL129C	TAO3	9	106107	113237	C	PAG1	Component of the RAM signaling network; is involved in regulation of Ace2p activity and cellular morphogenesis, interacts with protein kinase Cbk1p and also with Kic1p	12.3048	0.0460214	0.257982	0.561529	12.181	-0.09	0.25	0.628031	no
YIL157C	COA1	9	46949	47542	C	FMP35	Mitochondrial inner membrane protein; required for assembly of the cytochrome c oxidase complex (complex IV); interacts with complex IV assembly factor Shy1p during the early stages of assembly	10.8334	0.0512806	0.14362	0.417442	13.378	-0.09	0.13	0.470909	no
YIR035C	YIR035C	9	421026	421790	C	sepiapterin reductase family protein	Putative cytoplasmic short-chain dehydrogenase/reductase	11.8372	-0.0847421	0.0509103	0.231795	12.182	-0.09	0.23	0.607238	no
YJR001W	AVT1	10	436802	438610	W		Vacuolar transporter; imports large neutral amino acids into the vacuole; member of a family of seven S. cerevisiae genes (AVT1-7) related to vesicular GABA-glycine transporters	12.5535	-0.025288	0.400937	0.69159	12.408	-0.09	0.26	0.635283	no
YKL077W	YKL077W	11	291453	292631	W		Putative protein of unknown function; green fluorescent protein (GFP)-fusion protein localizes to the vacuole	13.1164	0.00217656	0.949396	0.982652	13.851	-0.09	0.057	0.310147	no
YLR078C	BOS1	12	285736	286559	C	SEC32	v-SNARE (vesicle specific SNAP receptor); localized to the endoplasmic reticulum membrane and necessary for vesicular transport from the ER to the Golgi; required for efficient nuclear fusion during mating	10.9308	-0.0616266	0.0574034	0.24957	12.587	-0.09	0.17	0.530482	no
YLR083C	EMP70	12	294091	296094	C	TMN1|p24a	Protein with a role in cellular adhesion and filamentous growth; also endosome-to-vacuole sorting; similar to Tmn3p; member of Transmembrane Nine family of proteins with 9 transmembrane segments; EMP70 has a paralog, TMN2, that arose from the whole genome duplication	13.6117	-0.00764373	0.727899	0.892999	14.341	-0.09	0.041	0.25837	no
YLR096W	KIN2	12	332590	336033	W	serine/threonine protein kinase KIN2	Serine/threonine protein kinase involved in regulation of exocytosis; localizes to the cytoplasmic face of the plasma membrane; KIN2 has a paralog, KIN1, that arose from the whole genome duplication	12.2908	0.0520235	0.173613	0.462351	13.046	-0.09	0.13	0.470909	no
YLR200W	YKE2	12	549012	549356	W	tubulin-binding prefolding complex subunit YKE2|PFD6|GIM1	Subunit of the heterohexameric Gim/prefoldin protein complex; involved in the folding of alpha-tubulin, beta-tubulin, and actin; prefoldin complex also localizes to chromatin of actively transcribed genes in the nucleus and facilitates transcriptional elongation	10.7546	-0.0617375	0.105283	0.351885	13.749	-0.09	0.24	0.618507	no
YLR353W	BUD8	12	834352	836163	W		Protein involved in bud-site selection; diploid mutants display a unipolar budding pattern instead of the wild-type bipolar pattern, and bud at the proximal pole; BUD8 has a paralog, BUD9, that arose from the whole genome duplication	11.1425	-0.0517536	0.176137	0.464561	12.174	-0.09	0.21	0.586731	no
YMR261C	TPS3	13	790205	793369	C	trehalose 6-phosphate synthase/phosphatase complex subunit	Regulatory subunit of trehalose-6-phosphate synthase/phosphatase; involved in synthesis of storage carbohydrate trehalose; expression is induced by stress conditions and repressed by the Ras-cAMP pathway; TPS3 has a paralog, TSL1, that arose from the whole genome duplication	12.3322	0.0898063	0.0493559	0.228091	13.044	-0.09	0.17	0.530482	no
YMR298W	LIP1	13	863819	864271	W	sphingosine N-acyltransferase subunit LIP1	Ceramide synthase subunit; single-span ER membrane protein associated with Lag1p and Lac1p and required for ceramide synthase activity, null mutant grows extremely slowly and is defective in ceramide synthesis	11.6346	0.0185957	0.560451	0.798562	14.873	-0.09	0.17	0.530482	no
YNL088W	TOP2	14	457704	461990	W	DNA topoisomerase 2|TRF3|TOR3	Topoisomerase II; relieves torsional strain in DNA by cleaving and re-sealing phosphodiester backbone of both positively and negatively supercoiled DNA; cleaves complementary strands; localizes to axial cores in meiosis; required for replication slow zone (RSZ) breakage following Mec1p inactivation; human homolog TOP2A implicated in cancers, and can complement yeast null mutant	13.1163	0.0395832	0.252746	0.555755	13.419	-0.09	0.75	0.919309	no
YNL102W	POL1	14	430087	434493	W	DNA-directed DNA polymerase alpha catalytic subunit POL1|HPR3|CRT5|CDC17	Catalytic subunit of the DNA polymerase I alpha-primase complex; required for the initiation of DNA replication during mitotic DNA synthesis and premeiotic DNA synthesis	12.2718	-0.0239384	0.589417	0.817041	12.791	-0.09	0.14	0.488679	no
YNL271C	BNI1	14	129522	135383	C	formin BNI1|SHE5|PPF3	Formin; polarisome component; nucleates the formation of linear actin filaments, involved in cell processes such as budding and mitotic spindle orientation which require the formation of polarized actin cables; recruited to the division site in a Glc7p/Ref2p dependent manner following release of Bnr1p; functionally redundant with BNR1	12.298	0.0496451	0.253266	0.556135	12.114	-0.09	0.14	0.488679	no
YOL004W	SIN3	15	316938	321548	W	transcriptional regulator SIN3|UME4|SDS16|SDI1|RPD1|GAM2|CPE1	Component of both the Rpd3S and Rpd3L histone deacetylase complexes; involved in transcriptional repression and activation of diverse processes, including mating-type switching and meiosis; involved in the maintenance of chromosomal integrity	12.9231	0.0136602	0.750001	0.90117	13.237	-0.09	0.17	0.530482	no
YOL036W	YOL036W	15	256745	259030	W		Protein of unknown function; potential Cdc28p substrate; YOL036W has a paralog, YIR016W, that arose from the whole genome duplication	12.2792	0.0419916	0.222195	0.522399	11.813	-0.09	0.058	0.311014	no
YOL087C	DUF1	15	155287	158637	C		Ubiquitin-binding protein of unknown function; contains one WD40 repeat in a beta-propeller fold; green fluorescent protein (GFP)-fusion protein localizes to the cytoplasm; homolog of human WDR48/UAF1, which is involved in regulating the Fanconi anemia pathway; deletion mutant is sensitive to various chemicals including phenanthroline, sanguinarine, and nordihydroguaiaretic acid	11.7114	0.0874267	0.0113182	0.0910999	12.362	-0.09	0.4	0.743185	no
YOR290C	SNF2	15	855147	860258	C	SWI/SNF catalytic subunit SNF2|TYE3|SWI2|HAF1|GAM1	Catalytic subunit of the SWI/SNF chromatin remodeling complex; involved in transcriptional regulation; contains DNA-stimulated ATPase activity; functions interdependently in transcriptional activation with Snf5p and Snf6p	12.3919	0.0415598	0.342686	0.648525	13.574	-0.09	0.13	0.470909	no
YOR294W	RRS1	15	868340	868951	W		Essential protein that binds ribosomal protein L11; required for nuclear export of the 60S pre-ribosomal subunit during ribosome biogenesis; localizes to the nucleolus and in foci along nuclear periphery; cooperates with Ebp2p and Mps3p to mediate telomere clustering by binding Sir4p, but is not involved in telomere tethering; mouse homolog shows altered expression in Huntington's disease model m…	12.3494	-0.0427849	0.273982	0.576092	14.349	-0.09	0.76	0.921536	no
YPL259C	APM1	16	51244	52671	C	YAP54	Mu1-like medium subunit of the AP-1 complex; binds clathrin; involved in clathrin-dependent Golgi protein sorting; the AP-1 complex is the clathrin-associated protein complex	11.2018	0.04697	0.252642	0.555755	13.237	-0.09	0.24	0.618507	no
YBR015C	MNN2	2	267710	269503	C	alpha-1,2-mannosyltransferase MNN2|LDB8|CRV4|TTP1	Alpha-1,2-mannosyltransferase; responsible for addition of the first alpha-1,2-linked mannose to form the branches on the mannan backbone of oligosaccharides, localizes to an early Golgi compartment	13.0317	-0.00584188	0.886126	0.958058	11.832	-0.08	0.12	0.456388	no
YBR135W	CKS1	2	504854	505306	W	cyclin-dependent protein kinase regulatory subunit CKS1	Cyclin-dependent protein kinase regulatory subunit and adaptor; interacts with Cdc28p (aka Cdk1p); required for G1/S and G2/M phase transitions and budding; mediates phosphorylation and degradation of Sic1p; modulates proteolysis of M-phase targets through interactions with the proteasome; role in transcriptional regulation, recruiting proteasomal subunits to target gene promoters; human homologs…	10.4681	-0.0294386	0.471062	0.741105	13.417	-0.08	0.51	0.821966	no
YBR265W	TSC10	2	738582	739544	W	3-dehydrosphinganine reductase	3-ketosphinganine reductase; catalyzes the second step in phytosphingosine synthesis; essential for growth in the absence of exogenous dihydrosphingosine or phytosphingosine; localized to lipid droplets; member of short chain dehydrogenase/reductase protein family	11.4236	-0.0623978	0.0598273	0.255248	12.995	-0.08	0.095	0.412144	no
YBR275C	RIF1	2	751356	757106	C	DNA-binding protein RIF1	Protein that binds to the Rap1p C-terminus; acts synergistically with Rif2p to help control telomere length and establish telomeric silencing; involved in control of DNA replication; contributes to resection of DNA double strand breaks (DSBs); deletion results in telomere elongation	12.3739	0.0565069	0.163432	0.445474	12.925	-0.08	0.21	0.586731	no
YCR036W	RBK1	3	193297	194298	W	putative ribokinase	Putative ribokinase	11.5813	-0.0615685	0.0315993	0.174973	14.484	-0.08	0.22	0.594161	no
YDL040C	NAT1	4	378874	381438	C	peptide alpha-N-acetyltransferase complex A subunit NAT1|NAA15|AAA1	Subunit of protein N-terminal acetyltransferase NatA; NatA comprised of Nat1p, Ard1p, and Nat5p; N-terminally acetylates many proteins to influence multiple processes such as cell cycle progression, heat-shock resistance, mating, sporulation, telomeric silencing and early stages of mitophagy; orthologous to human NAA15; expression of both human NAA10 and NAA15 functionally complements ard1 nat1 d…	13.683	0.00330537	0.931368	0.975969	13.754	-0.08	0.14	0.488679	no
YDR011W	SNQ2	4	465919	470424	W	ATP-binding cassette transporter SNQ2	Plasma membrane ATP-binding cassette (ABC) transporter; multidrug transporter involved in multidrug resistance and resistance to singlet oxygen species	13.6024	0.0805364	0.00521657	0.051761	15.134	-0.08	0.38	0.729577	no
YDR062W	LCB2	4	576474	578159	W	serine C-palmitoyltransferase LCB2|TSC1|SCS1	Component of serine palmitoyltransferase; responsible along with Lcb1p for the first committed step in sphingolipid synthesis, which is the condensation of serine with palmitoyl-CoA to form 3-ketosphinganine	13.6995	-0.0310416	0.296557	0.602704	13.22	-0.08	0.45	0.78169	no
YDR067C	OCA6	4	582791	583465	C	protein-tyrosine-phosphatase	Cytoplasmic protein required for replication of Brome mosaic virus; S. cerevisiae is a model system for studying positive-strand RNA virus replication; null mutation confers sensitivity to tunicamycin and DTT	9.79384	0.0242681	0.57837	0.810101	11.173	-0.08	0.27	0.64333	no
YDR107C	TMN2	4	669016	671034	C		Protein with a role in cellular adhesion and filamentous growth; similar to Tmn3p; member of the evolutionarily conserved Transmembrane Nine family of proteins with nine membrane-spanning segments; TMN2 has a paralog, EMP70, that arose from the whole genome duplication	10.73	-0.0513107	0.208237	0.508228	13.417	-0.08	0.32	0.685525	no
YDR174W	HMO1	4	812110	812850	W	HSM2	Chromatin associated high mobility group (HMG) family member; involved in compacting, bending, bridging and looping DNA; rDNA-binding component that regulates transcription from RNA polymerase I promoters; regulates start site selection of ribosomal protein genes via RNA polymerase II promoters; role in genome maintenance; associates with a 5'-3' DNA helicase and Fpr1p, a prolyl isomerase; reloca…	12.8918	-0.0933426	0.0069847	0.064451	13.235	-0.08	0.17	0.530482	no
YDR280W	RRP45	4	1020747	1021664	W	exosome non-catalytic core subunit RRP45	Exosome non-catalytic core component; involved in 3'-5' RNA processing and degradation in both the nucleus and the cytoplasm; has similarity to E. coli RNase PH and to human hRrp45p (PM/SCL-75, EXOSC9); protein abundance increases in response to DNA replication stress	11.7543	-0.0438896	0.258875	0.562836	13.408	-0.08	0.096	0.413023	no
YDR293C	SSD1	4	1045640	1049392	C	mRNA-binding translational repressor SSD1|SRK1|RLT1|MCS1|CLA1	Translational repressor with a role in polar growth and wall integrity; regulated by Cbk1p phosphorylation to effect bud-specific translational control and localization of specific mRNAs; interacts with TOR pathway components; contains a functional N-terminal nuclear localization sequence and nucleocytoplasmic shuttling appears to be critical to Ssd1p function	12.802	0.0688353	0.0973729	0.339419	13.182	-0.08	0.16	0.51995	no
YDR335W	MSN5	4	1141168	1144842	W	karyopherin MSN5|STE21|KAP142	Karyopherin; involved in nuclear import and export of proteins, including import of replication protein A and export of Far1p and transcription factors Swi5p, Swi6p, Msn2p, and Pho4p; required for re-export of mature tRNAs after their retrograde import from the cytoplasm; exportin-5 homolog	12.6723	0.0202147	0.538036	0.781502	12.992	-0.08	0.58	0.85791	no
YDR341C	YDR341C	4	1151803	1153626	C	arginine--tRNA ligase|ArgRS|RRS1	Arginyl-tRNA synthetase; the authentic, non-tagged protein is detected in highly purified mitochondria in high-throughput studies; YDR341C has a paralog, MSR1, that arose from the whole genome duplication	14.7491	0.0358544	0.220018	0.520492	14.943	-0.08	0.13	0.470909	no
YER125W	RSP5	5	410189	412618	W	NEDD4 family E3 ubiquitin-protein ligase|SMM1|UBY1|NPI1|MUT2|MDP1	NEDD4 family E3 ubiquitin ligase; regulates processes including: MVB sorting, the heat shock response, transcription, endocytosis and ribosome stability; ubiquitinates Sec23p, Sna3p, Ste4p, Nfi1p, Rpo21p and Sem1p; autoubiquitinates; deubiquitinated by Ubp2p; regulated by SUMO ligase Siz1p, in turn regulates Siz1p SUMO ligase activity; required for efficient Golgi-to-ER trafficking in COPI mutant…	11.7589	0.0785131	0.0838747	0.308829	13.881	-0.08	0.11	0.438983	no
YER172C	BRR2	5	529530	536021	C	ATP-dependent RNA helicase BRR2|PRP44|SNU246|SLT22|RSS1	RNA-dependent ATPase RNA helicase (DEIH box); required for disruption of U4/U6 base-pairing in native snRNPs to activate the spliceosome for catalysis; homologous to human U5-200kD	12.4534	0.00970952	0.792031	0.917131	12.472	-0.08	0.37	0.725985	no
YFL004W	VTC2	6	131810	134296	W	vacuolar transporter chaperone|PHM1	Regulatory subunit of the vacuolar transporter chaperone (VTC) complex; involved in membrane trafficking, vacuolar polyphosphate accumulation, microautophagy and non-autophagic vacuolar fusion; VTC2 has a paralog, VTC3, that arose from the whole genome duplication	13.0089	0.0672082	0.0181196	0.124735	13.76	-0.08	0.045	0.271047	no
YFL005W	SEC4	6	130334	130981	W	Rab family GTPase SEC4|SRO6	Rab family GTPase; essential for vesicle-mediated exocytic secretion and autophagy; associates with the exocyst component Sec15p and may regulate polarized delivery of transport vesicles to the exocyst at the plasma membrane	12.4552	0.0047768	0.888376	0.958058	13.816	-0.08	0.076	0.361838	no
YFL034W	MIL1	6	65477	68698	W		Predicted lipase; binds variant medium clathrin chain Apm2p and contributes to its membrane recruitment; putative integral membrane protein that interacts with Rpp0p component of ribosomal stalk	11.5554	-0.0300667	0.418917	0.706324	11.193	-0.08	0.48	0.8	no
YFL038C	YPT1	6	55366	55986	C	Rab family GTPase YPT1|YP2	Rab family GTPase; involved in the ER-to-Golgi step of the secretory pathway; complex formation with the Rab escort protein Mrs6p is required for prenylation of Ypt1p by type II protein geranylgeranyltransferase (Bet2p-Bet4p); binds to unspliced HAC1 mRNA; regulates the unfolded protein response (UPR) by promoting the decay of HAC1 RNA; localizes to the early Golgi, the transitional Golgi and ER …	13.4814	-0.0925619	0.0229356	0.145689	13.693	-0.08	0.033	0.229758	no
YFR011C	MIC19	6	166746	167258	C	AIM13|MCS19	Component of the MICOS complex; MICOS (formerly MINOS or MitOS) is a mitochondrial inner membrane complex that extends into the intermembrane space and has a role in the maintenance of crista junctions, inner membrane architecture, and formation of contact sites to the outer membrane; Mic19p is peripheral to the inner membrane and may connect Mic60p with the Mic10p-Mic12p-Mic27p subcomplex; both …	10.4837	-0.0738369	0.0522071	0.234362	14.912	-0.08	0.11	0.438983	no
YFR040W	SAP155	6	234242	237250	W		Protein required for function of the Sit4p protein phosphatase; forms a complex with Sit4p; member of a family of similar proteins including Sap4p, Sap185p, and Sap190p; protein abundance increases in response to DNA replication stress; SAP155 has a paralog, SAP4, that arose from the whole genome duplication	12.7847	0.0870972	0.00615674	0.0586623	13.002	-0.08	0.22	0.594161	no
YHR104W	GRE3	8	323409	324392	W	trifunctional aldehyde reductase/xylose reductase/glucose 1-dehydrogenase (NADP(+))	Aldose reductase; involved in methylglyoxal, d-xylose, arabinose, and galactose metabolism; stress induced (osmotic, ionic, oxidative, heat shock, starvation and heavy metals); regulated by the HOG pathway; protein abundance increases in response to DNA replication stress	12.1272	-0.0754709	0.116451	0.372942	14.795	-0.08	0.0051	0.0667121	no
YHR149C	SKG6	8	394455	396659	C		Integral membrane protein; localizes primarily to growing sites such as the bud tip or the cell periphery; potential Cdc28p substrate; Skg6p interacts with Zds1p and Zds2p; SKG6 has a paralog, TOS2, that arose from the whole genome duplication	11.8931	-0.015204	0.735542	0.895503	12.078	-0.08	0.73	0.910303	no
YHR206W	SKN7	8	512732	514600	W	kinase-regulated stress-responsive transcription factor SKN7|POS9|BRY1	Nuclear response regulator and transcription factor; physically interacts with the Tup1-Cyc8 complex and recruits Tup1p to its targets; part of a branched two-component signaling system; required for optimal induction of heat-shock genes in response to oxidative stress; involved in osmoregulation; relocalizes to the cytosol in response to hypoxia; SKN7 has a paralog, HMS2, that arose from the who…	12.2469	0.00123989	0.971145	0.989894	12.771	-0.08	0.08	0.374684	no
YJL055W	YJL055W	10	333357	334094	W		Putative protein of unknown function; functions together with HAM1 to mediate resistance to 5-FU; specifically reduces the incorporation of 5-FU into RNA, without affecting uptake or incorporation of uracil into RNA; proposed to be involved in the metabolism of purine and pyrimidine base analogues; deletion mutants are sensitive to HAP and AHA	12.5563	-0.0504623	0.0796444	0.301747	11.068	-0.08	0.3	0.669251	no
YJR060W	CBF1	10	548759	549814	W	GFII|CP1|CPF1|CEP1	Basic helix-loop-helix (bHLH) protein; forms homodimer to bind E-box consensus sequence CACGTG present at MET gene promoters and centromere DNA element I (CDEI); affects nucleosome positioning at this motif; associates with other transcription factors such as Met4p and Isw1p to mediate transcriptional activation or repression; associates with kinetochore proteins, required for chromosome segregat…	11.0416	-0.0178195	0.602683	0.823663	13.833	-0.08	0.14	0.488679	no
YJR096W	YJR096W	10	611195	612043	W	aldo-keto reductase superfamily protein	Xylose and arabinose reductase; member of the aldo-keto reductase (AKR) family; GFP-fusion protein is induced in response to the DNA-damaging agent MMS	10.6202	-0.0274779	0.527017	0.773415	13.999	-0.08	0.025	0.19503	no
YKL053C-A	MDM35	11	339182	339442	C		Mitochondrial intermembrane space protein; forms complex with Ups2p that transfers phosphatidylserine from outer membrane to inner membrane for phosphatidylethanolamine synthesis; mutation affects mitochondrial distribution and morphology; contains twin cysteine-x9-cysteine motifs; protein abundance increases in response to DNA replication stress	8.93642	-0.0667117	0.253537	0.556135	14.286	-0.08	0.79	0.93643	no
YKR082W	NUP133	11	592825	596298	W	RAT3	Subunit of Nup84p subcomplex of nuclear pore complex (NPC); contributes to nucleocytoplasmic transport, NPC biogenesis; is involved in establishment of a normal nucleocytoplasmic concentration gradient of GTPase Gsp1p; also plays roles in several processes that may require localization of genes or chromosomes at nuclear periphery, including double-strand break repair, transcription and chromatin …	12.897	0.0464076	0.180708	0.470363	13.912	-0.08	0.11	0.438983	no
YLR178C	TFS1	12	513162	513821	C	DKA1	Inhibitor of carboxypeptidase Y (Prc1p), and Ras GAP (Ira2p); phosphatidylethanolamine-binding protein (PEBP) family member and ortholog of hPEBP1/RKIP, a natural metastasis suppressor; targets to vacuolar membranes during stationary phase; acetylated by NatB N-terminal acetyltransferase; protein abundance increases in response to DNA replication stress	10.3908	-0.0164408	0.782461	0.913957	14.474	-0.08	0.15	0.507843	no
YLR199C	PBA1	12	547853	548769	C	POC1	Protein involved in 20S proteasome assembly; forms a heterodimer with Add66p that binds to proteasome precursors; interaction with Pba1p-Add66p may affect function of the mature proteasome and its role in maintaining respiratory metabolism; similar to human PAC1 constituent of the PAC1-PAC2 complex involved in proteasome assembly	10.95	0.0143618	0.741756	0.898318	13.7	-0.08	0.034	0.230524	no
YLR215C	CDC123	12	570776	571858	C	cell proliferation protein CDC123	Assembly factor for the eIF2 translation initiation factor complex; regulates translational initiation; conserved residues of this ATP-Grasp protein that bind to ATP-Mg2+ in the pombe ortholog are required for complex assembly in budding yeast; interaction with eIF2 subunit Gcd11p facilitates complex assembly and activity; required for the START transition and timely progression through G2; regul…	10.9066	-0.00146336	0.966835	0.987914	13.408	-0.08	0.32	0.685525	no
YLR219W	MSC3	12	574151	576337	W		Protein of unknown function; green fluorescent protein (GFP)-fusion protein localizes to the cell periphery; msc3 mutants are defective in directing meiotic recombination events to homologous chromatids; potential Cdc28p substrate; protein abundance increases in response to DNA replication stress	10.9095	0.0395403	0.418912	0.706324	13.387	-0.08	0.064	0.330858	no
YLR293C	GSP1	12	720771	721430	C	Ran GTPase GSP1|CST17|CNR1	Ran GTPase; GTP binding protein (mammalian Ranp homolog) involved in the maintenance of nuclear organization, RNA processing and transport; regulated by Srm1p, Rna1p, Yrb1p, Yrb2p, Yrp4p, Yrb30p, Cse1p and Kap95p; GSP1 has a paralog, GSP2, that arose from the whole genome duplication	14.753	-0.0698649	0.00968048	0.0819282	14.426	-0.08	0.11	0.438983	no
YLR410W	VIP1	12	937541	940981	W	inositol polyphosphate kinase VIP1	Inositol hexakisphosphate and inositol heptakisphosphate kinase; inositol heptakisphosphate (IP7) production is important for phosphate signaling; involved in cortical actin cytoskeleton function, and invasive pseudohyphal growth analogous to S. pombe asp1; inositol hexakisphosphate is also known as IP6	12.5943	-0.0018807	0.961466	0.985696	12.794	-0.08	0.073	0.356736	no
YMR184W	ADD37	13	628189	628785	W		Protein of unknown function; involved in ER-associated protein degradation; green fluorescent protein (GFP)-fusion protein localizes to the cytoplasm and is induced in response to the DNA-damaging agent MMS; YMR184W is not an essential gene; protein abundance increases in response to DNA replication stress	10.2259	0.00368325	0.924144	0.973678	11.669	-0.08	0.24	0.618507	no
YMR270C	RRN9	13	805326	806423	C		Protein involved in promoting high level transcription of rDNA; subunit of UAF (upstream activation factor) for RNA polymerase I	11.224	0.00120973	0.974472	0.991528	12.481	-0.08	0.56	0.855189	no
YNL068C	FKH2	14	495701	498289	C	forkhead family transcription factor FKH2	Forkhead family transcription factor; rate-limiting activator of replication origins; evolutionarily conserved regulator of lifespan; binds multiple chromosomal elements with distinct specificities, cell cycle dynamics; positively regulates transcriptional elongation; facilitates clustering, activation of early-firing replication origins; negative role in chromatin silencing at HML and HMR; major…	11.9349	-0.0208206	0.607585	0.82753	12.409	-0.08	0.13	0.470909	no
YNL161W	CBK1	14	332597	334867	W	serine/threonine protein kinase CBK1	Serine/threonine protein kinase of the the RAM signaling network; Ndr/LATS family member; binds regulatory subunit Mob2p; involved in regulation of cellular morphogenesis, polarized growth, and septum destruction; phosphorylation by Cbk1p regulates localization and activity of Ace2p transcription factor and Ssd1p translational repressor; Cbk1p activity is regulated by both phosphorylation and spe…	11.8592	0.00214397	0.946264	0.982489	11.158	-0.08	0.64	0.879112	no
YNL215W	IES2	14	244468	245430	W		Protein that associates with the INO80 chromatin remodeling complex; associates with the INO80 complex under low-salt conditions; essential for growth under anaerobic conditions; protein abundance increases in response to DNA replication stress	11.3375	0.0143197	0.688366	0.872904	13.722	-0.08	0.64	0.879112	no
YNL260C	LTO1	14	156859	157455	C	ribosome biosynthesis protein LTO1	Essential protein that forms a complex with Rli1p and Yae1p; ortholog of human ORAOV1, which is overexpressed in solid tumors; inviability of null mutant under standard conditions is complemented by overexpression of ORAOV1; essential for growth under standard (aerobic) conditions but not under anaerobic conditions; may have a role in protection of ribosomal assembly and function from damage due …	9.87004	-0.00517398	0.907194	0.967371	13.693	-0.08	0.68	0.894919	no
YNR029C	YNR029C	14	677199	678488	C		Putative protein of unknown function; deletion confers reduced fitness in saline	11.4712	-0.0577789	0.0842438	0.309989	12.785	-0.08	0.41	0.7494	no
YNR050C	LYS9	14	714048	715388	C	saccharopine dehydrogenase (NADP+, L-glutamate-forming)|LYS13	Saccharopine dehydrogenase (NADP+, L-glutamate-forming); catalyzes the formation of saccharopine from alpha-aminoadipate 6-semialdehyde, the seventh step in lysine biosynthesis pathway; exhibits genetic and physical interactions with TRM112	13.0348	-0.0592385	0.125914	0.38901	14.167	-0.08	0.021	0.174887	no
YOR157C	PUP1	15	630966	631751	C	proteasome core particle subunit beta 2	Beta 2 subunit of the 20S proteasome; endopeptidase with trypsin-like activity that cleaves after basic residues; synthesized as a proprotein before being proteolytically processed for assembly into 20S particle; human homolog is subunit Z	12.2613	-0.0703412	0.024341	0.151114	13.179	-0.08	0.067	0.338926	no
YOR184W	SER1	15	679357	680544	W	O-phospho-L-serine:2-oxoglutarate transaminase|ADE9	3-phosphoserine aminotransferase; catalyzes the formation of phosphoserine from 3-phosphohydroxypyruvate, required for serine and glycine biosynthesis; regulated by the general control of amino acid biosynthesis mediated by Gcn4p; protein abundance increases in response to DNA replication stress	13.973	-0.0488894	0.171936	0.460228	13.276	-0.08	0.28	0.649821	no
YOR352W	TFB6	15	997213	998244	W	TFIIH complex subunit TFB6	Subunit of TFIIH complex; facilities dissociation of the Ssl2p helices from TFIIH; expression levels regulated by Arg5,6p; green fluorescent protein (GFP)-fusion protein localizes to the cytoplasm and nucleus	9.96821	0.0775222	0.0783975	0.299587	12.748	-0.08	0.36	0.720556	no
YPL085W	SEC16	16	387067	393654	W	LPF1	COPII vesicle coat protein required for ER transport vesicle budding; essential factor in endoplasmic reticulum exit site (ERES) formation, as well as in COPII-mediated ER-to-Golgi traffic; bound to periphery of ER membranes and may act to stabilize initial COPII complexes; interacts with Sec23p, Sec24p and Sec31p	12.3052	0.0577901	0.224284	0.524911	13.51	-0.08	0.22	0.594161	no
YPL267W	ACM1	16	38169	38798	W		Pseudosubstrate inhibitor of the APC/C; suppresses APC/C [Cdh1]-mediated proteolysis of mitotic cyclins; associates with Cdh1p, Bmh1p and Bmh2p; cell cycle regulated protein; the anaphase-promoting complex/cyclosome is also known as APC/C	9.62867	-0.0878769	0.0600124	0.255248	12.932	-0.08	0.32	0.685525	no
YPR024W	YME1	16	610481	612724	W	i-AAA protease YME1|YTA11|OSD1	Catalytic subunit of i-AAA protease complex; complex is located in mitochondrial inner membrane; responsible for degradation of unfolded or misfolded mitochondrial gene products; serves as nonconventional translocation motor to pull PNPase into intermembrane space; also has role in intermembrane space protein folding; mutation causes elevated rate of mitochondrial turnover; human homolog YME1L1 c…	12.6794	-0.0274576	0.382307	0.679066	12.059	-0.08	0.43	0.76754	no
YPR062W	FCY1	16	677165	677641	W	cytosine deaminase|yCD	Cytosine deaminase; zinc metalloenzyme that catalyzes the hydrolytic deamination of cytosine to uracil; of biomedical interest because it also catalyzes the deamination of 5-fluorocytosine (5FC) to form anticancer drug 5-fluorouracil (5FU)	12.9121	-0.058015	0.0573239	0.24957	13.086	-0.08	0.43	0.76754	no
YBL028C	YBL028C	2	167518	167838	C		Protein of unknown function that may interact with ribosomes; green fluorescent protein (GFP)-fusion protein localizes to the nucleolus; predicted to be involved in ribosome biogenesis	11.1208	-0.0796306	0.0795109	0.301747	13.151	-0.07	0.68	0.894919	no
YBL069W	AST1	2	90741	92030	W		Lipid raft associated protein; interacts with the plasma membrane ATPase Pma1p and has a role in its targeting to the plasma membrane by influencing its incorporation into lipid rafts; sometimes classified in the medium-chain dehydrogenase/reductases (MDRs) superfamily; AST1 has a paralog, AST2, that arose from the whole genome duplication	11.1951	-0.0564177	0.293123	0.598411	11.882	-0.07	0.58	0.85791	no
YBR077C	SLM4	2	391805	392293	C	GSE1|NIR1|EGO3	Component of the EGO and GSE complexes; essential for integrity and function of EGO; EGO is involved in the regulation of microautophagy and GSE is required for proper sorting of amino acid permease Gap1p; gene exhibits synthetic genetic interaction with MSS4	9.50383	-0.0723703	0.164467	0.447029	13.526	-0.07	0.35	0.714905	no
YBR164C	ARL1	2	567875	568426	C	Arf family GTPase ARL1|DLP2	Soluble GTPase with a role in regulation of membrane traffic; regulates potassium influx; role in membrane organization at trans-Golgi network; required for delivery of Atg9p to the phagophore assembly site during autophagy under high temperature stress; required with Ypt6p for starvation-induced autophagy; required for the CVT pathway under non-starvation conditions; G protein of the Ras superfa…	11.8906	-0.0283582	0.390436	0.684631	13.39	-0.07	0.17	0.530482	no
YBR198C	TAF5	2	616127	618523	C	chromatin modification protein|TafII90|TAF90	Subunit (90 kDa) of TFIID and SAGA complexes; involved in RNA polymerase II transcription initiation and in chromatin modification	12.5578	0.0224223	0.537877	0.781502	13.717	-0.07	0.072	0.3552	no
YDR519W	FPR2	4	1480425	1480832	W	peptidylprolyl isomerase family protein FPR2|FKB2	Membrane-bound peptidyl-prolyl cis-trans isomerase (PPIase); binds to the drugs FK506 and rapamycin; expression pattern suggests possible involvement in ER protein trafficking; relocalizes from nucleus to vacuole upon DNA replication stress; mutation is functionally complemented by human FKBP2	10.9763	-0.0545656	0.200777	0.500532	14.398	-0.07	0.76	0.921536	no
YER034W	YER034W	5	221846	222403	W		Protein of unknown function; non-essential gene; expression induced upon calcium shortage; protein abundance increases in response to DNA replication stress	9.19928	-0.0413932	0.421728	0.708094	13.114	-0.07	0.84	0.95129	no
YER047C	SAP1	5	243810	246503	C	putative AAA family ATPase SAP1	Putative ATPase of the AAA family; interacts with the Sin1p transcriptional repressor in the two-hybrid system	10.93	0.0432494	0.297112	0.602919	10.839	-0.07	0.71	0.900539	no
YER094C	PUP3	5	348729	349346	C	proteasome core particle subunit beta 3|SCS32	Beta 3 subunit of the 20S proteasome; involved in ubiquitin-dependent catabolism; human homolog is subunit C10	12.878	-0.0200503	0.563764	0.800365	13.898	-0.07	0.13	0.470909	no
YER128W	VFA1	5	415859	416470	W		Protein that interacts with Vps4p and has a role in vacuolar sorting; stimulates the ATPase activity of Vps4; localizes to endosomes in a Vps4-dependent manner; overexpression causes canavanine sensitivity and confers a partial class D vacuole morphology	9.51841	0.00923961	0.848539	0.94151	11.621	-0.07	0.53	0.837523	no
YFL045C	SEC53	6	43628	44392	C	phosphomannomutase SEC53|ALG4	Phosphomannomutase; involved in synthesis of GDP-mannose and dolichol-phosphate-mannose; required for folding and glycosylation of secretory proteins in the ER lumen	14.5177	-0.111357	0.00135329	0.0194219	13.765	-0.07	0.039	0.250025	no
YGR078C	PAC10	7	639772	640371	C	tubulin-binding prefolding complex subunit PAC10|RKS2|PFD3|GIM2	Part of the heteromeric co-chaperone GimC/prefoldin complex; complex promotes efficient protein folding	11.0111	-0.0975257	0.0100271	0.0842421	13.63	-0.07	0.17	0.530482	no
YGR103W	NOP7	7	695417	697234	W	mRNA-binding ribosome synthesis protein NOP7|YPH1	Component of several different pre-ribosomal particles; forms a complex with Ytm1p and Erb1p that is required for maturation of the large ribosomal subunit; required for exit from G<sub>0</sub> and the initiation of cell proliferation	14.52	-0.0197842	0.580271	0.811731	13.99	-0.07	0.18	0.549764	no
YGR130C	YGR130C	7	751394	753844	C		Component of the eisosome with unknown function; GFP-fusion protein localizes to the cytoplasm; specifically phosphorylated in vitro by mammalian diphosphoinositol pentakisphosphate (IP7)	12.0042	0.0694109	0.127486	0.39136	13.95	-0.07	0.051	0.292882	no
YGR159C	NSR1	7	806412	807656	C	SHE5	Nucleolar protein that binds nuclear localization sequences; required for pre-rRNA processing and ribosome biogenesis; binds to single stranded telomeric DNA and mRNA; methylated by Hmt1p; interaction with Top1p and nucleolar localization are negatively regulated by polyphosphorylation	15.3859	-0.135981	0.00116222	0.0172387	13.708	-0.07	0.016	0.150691	no
YGR264C	MES1	7	1019598	1021853	C	methionine--tRNA ligase MES1|MetRS|MESI	Methionyl-tRNA synthetase; forms a complex with glutamyl-tRNA synthetase (Gus1p) and Arc1p, which increases the catalytic efficiency of both tRNA synthetases; also has a role in nuclear export of tRNAs; mutations in human ortholog MARS are associated with pediatric pulmonary alveolar proteinosis	14.7128	-0.0602218	0.0361406	0.190985	14.328	-0.07	0.026	0.199231	no
YHR019C	DED81	8	141894	143558	C	asparagine--tRNA ligase DED81	Cytosolic asparaginyl-tRNA synthetase; required for protein synthesis, catalyzes the specific attachment of asparagine to its cognate tRNA	14.8059	-0.0504434	0.220497	0.520492	13.796	-0.07	0.15	0.507843	no
YHR169W	DBP8	8	442181	443476	W	ATP-dependent RNA helicase DBP8	ATPase, putative RNA helicase of the DEAD-box family; component of 90S preribosome complex involved in production of 18S rRNA and assembly of 40S small ribosomal subunit; ATPase activity stimulated by association with Esf2p	12.1128	-0.0679095	0.114213	0.369683	14.26	-0.07	0.94	0.976966	no
YIL051C	MMF1	9	257843	258280	C	isoleucine biosynthesis protein MMF1|IBM1	Mitochondrial protein required for transamination of isoleucine; but not of valine or leucine; may regulate specificity of branched-chain transaminases Bat1p and Bat2p; induction of expression in response to stress is mediated by a Hog1p-regulated antisense RNA and gene looping; interacts genetically with mitochondrial ribosomal protein genes; MMF1 has a paralog, HMF1, that arose from the whole g…	12.9845	-0.112288	0.00421281	0.0448146	13.781	-0.07	0.042	0.260239	no
YIL135C	VHS2	9	95065	96375	C		Regulator of septin dynamics; involved in the regulation of septin dynamics at bud neck after mitotic entry, likely by stabilizing septin structure; regulated at post-translational level by cell cycle dependent phosphorylation; likely phosphorylated by Cdc28p and dephosphorylated by Cdc14p before cytokinesis; high-copy suppressor of synthetic lethality of sis2 sit4 double mutant; VHS2 has a paral…	10.6864	-0.0181125	0.68851	0.872904	12.994	-0.07	0.23	0.607238	no
YIL143C	SSL2	9	80510	83041	C	TFIIH/NER complex ATPase/helicase subunit SSL2|RAD25|LOM3	Component of RNA polymerase transcription factor TFIIH holoenzyme; acts as dsDNA-dependent translocase in context of TFIIH, unwinds DNA strands during initiation and promotes transcription start site (TSS) scanning; has DNA-dependent ATPase/helicase activity; interacts functionally with TFIIB, has roles in TSS selection and gene looping to juxtapose initiation and termination regions; involved in…	12.0054	0.00643436	0.810749	0.926685	11.652	-0.07	0.82	0.945171	no
YIR006C	PAN1	9	365466	369908	C	DIM2|MIP3|MDP3	Part of actin cytoskeleton-regulatory complex Pan1p-Sla1p-End3p; associates with actin patches on cell cortex; promotes protein-protein interactions essential for endocytosis; binds to and activates Arp2/3 complex in vitro; phosphorylation of Thr-1225 is regulated by MAPK Hog1p in response to osmotic stress; previously thought to be a subunit of poly(A) ribonuclease	12.8429	0.0374006	0.374433	0.672344	12.856	-0.07	0.061	0.319818	no
YJL033W	HCA4	10	383837	386149	W	RNA-dependent ATPase HCA4|ECM24|DBP4	DEAD box RNA helicase; component of the SSU; interacts with Bfr2p and Enp2p; high-copy number suppression of a U14 snoRNA processing mutant suggests an involvement in 18S rRNA synthesis	13.4389	-0.0403506	0.241559	0.544525	13.012	-0.07	0.089	0.401585	no
YJL143W	TIM17	10	147101	147577	W	protein transporter TIM17|SMS1|MPI2|MIM17	Essential component of the TIM23 complex; with Tim23p, contributes to the architecture and function of the import channel; may link the import motor to the core Translocase of the Inner Mitochondrial membrane (TIM23 complex)	12.0456	-0.0549252	0.150988	0.428258	15.407	-0.07	0.3	0.669251	no
YJL190C	RPS22A	10	74910	75302	C	uS8|ribosomal 40S subunit protein S22A|S8|rp50|YS22|S24A|S22A|RPS24	Protein component of the small (40S) ribosomal subunit; homologous to mammalian ribosomal protein S15A and bacterial S8; RPS22A has a paralog, RPS22B, that arose from the whole genome duplication	15.5087	-0.121824	0.00893794	0.0768876	14.627	-0.07	0.08	0.374684	no
YJR049C	UTR1	10	526884	528476	C	NADH/NAD(+) kinase	ATP-NADH kinase; phosphorylates both NAD and NADH; active as a hexamer; enhances the activity of ferric reductase (Fre1p); UTR1 has a paralog, YEF1, that arose from the whole genome duplication	11.7369	-0.00409665	0.901186	0.963771	12.391	-0.07	0.88	0.960472	no
YKL028W	TFA1	11	385758	387206	W	transcription factor TFIIE subunit TFA1	TFIIE large subunit; involved in recruitment of RNA polymerase II to the promoter, activation of TFIIH, and promoter opening	12.3352	-0.00392724	0.908227	0.967902	12.781	-0.07	0.44	0.773659	no
YKL173W	SNU114	11	122517	125543	W	U5 snRNP GTPase SNU114|GIN10	GTPase component of U5 snRNP involved in mRNA splicing via spliceosome; binds directly to U5 snRNA; proposed to be involved in conformational changes of the spliceosome; similarity to ribosomal translocation factor EF-2	11.9858	0.0182116	0.513412	0.766853	13.002	-0.07	0.19	0.560478	no
YKL196C	YKT6	11	74932	75534	C	palmitoyltransferase YKT6	Vesicle membrane protein (v-SNARE) with acyltransferase activity; involved in trafficking to and within the Golgi, endocytic trafficking to the vacuole, and vacuolar fusion; membrane localization due to prenylation at the carboxy-terminus; human homolog YKT6 can complement yeast ykt6 mutant	12.5151	-0.00741638	0.822632	0.931644	13.93	-0.07	0.073	0.356736	no
YML006C	GIS4	13	256092	258416	C		CAAX box containing protein of unknown function; proposed to be involved in the RAS/cAMP signaling pathway	11.5498	-0.0192511	0.586174	0.81616	11.81	-0.07	0.42	0.758577	no
YML078W	CPR3	13	111002	111550	W	peptidylprolyl isomerase CPR3|CYP3	Mitochondrial peptidyl-prolyl cis-trans isomerase (cyclophilin); catalyzes the cis-trans isomerization of peptide bonds N-terminal to proline residues; involved in protein refolding after import into mitochondria	12.3234	-0.101746	0.0227691	0.144952	13.966	-0.07	0.26	0.635283	no
YML100W	TSL1	13	70624	73920	W	trehalose 6-phosphate synthase/phosphatase complex subunit	Large subunit of trehalose 6-phosphate synthase/phosphatase complex; Tps1p-Tps2p complex converts uridine-5'-diphosphoglucose and glucose 6-phosphate to trehalose; contributes to survival to acute lethal heat stress; mutant has aneuploidy tolerance; protein abundance increases in response to DNA replication stress; TSL1 has a paralog, TPS3, that arose from the whole genome duplication	11.8238	0.131333	0.0436558	0.213775	12.979	-0.07	0.13	0.470909	no
YMR008C	PLB1	13	280590	282584	C	lysophospholipase	Phospholipase B (lysophospholipase) involved in lipid metabolism; required for efficient acyl chain remodeling of newly synthesized phosphatidylethanolamine-derived phosphatidylcholine; required for deacylation of phosphatidylcholine and phosphatidylethanolamine but not phosphatidylinositol; PLB1 has a paralog, PLB3, that arose from the whole genome duplication	12.2874	-0.00598931	0.881161	0.956268	13.249	-0.07	0.3	0.669251	no
YMR095C	SNO1	13	457285	457959	C	putative pyridoxal 5'-phosphate synthase	Protein of unconfirmed function; involved in pyridoxine metabolism; expression is induced during stationary phase; forms a putative glutamine amidotransferase complex with Snz1p, with Sno1p serving as the glutaminase	10.3193	0.0867458	0.149829	0.426211	13.731	-0.07	0.67	0.888986	no
YNL298W	CLA4	14	68915	71443	W	serine/threonine protein kinase CLA4|ERC10	Cdc42p-activated signal transducing kinase; member of the PAK (p21-activated kinase) family, along with Ste20p and Skm1p; involved in septin ring assembly, vacuole inheritance, cytokinesis, sterol uptake regulation; phosphorylates Cdc3p and Cdc10p; CLA4 has a paralog, SKM1, that arose from the whole genome duplication	11.5138	0.02551	0.486653	0.75166	12.099	-0.07	0.22	0.594161	no
YOL021C	DIS3	15	282421	285426	C	exosome catalytic subunit DIS3|MTR17|RRP44	Exosome core complex catalytic subunit; has both endonuclease and 3'-5' exonuclease activity; involved in 3'-5' RNA processing and degradation in both the nucleus and the cytoplasm; role in degradation of tRNAs; similar to E. coli RNase R and to human DIS3, which partially complements dis3-81 heat sensitivity; mutations in Dis3p analogous to human mutations implicated in multiple myeloma impair e…	12.7323	-0.0319833	0.412181	0.701384	12.137	-0.07	0.67	0.888986	no
YOL030W	GAS5	15	268187	269641	W	1,3-beta-glucanosyltransferase	1,3-beta-glucanosyltransferase; has similarity to Gas1p; localizes to the cell wall	13.6227	0.0393449	0.240975	0.544031	12.621	-0.07	0.04	0.254545	no
YOL127W	RPL25	15	80348	81190	W	uL23|ribosomal 60S subunit protein L25|L23|rpl6L|YL25|L25	Ribosomal 60S subunit protein L25; primary rRNA-binding ribosomal protein component of large ribosomal subunit; binds to 25S rRNA via a conserved C-terminal motif; homologous to mammalian ribosomal protein L23A and bacterial L23	16.0083	-0.129988	0.00611637	0.0584713	13.205	-0.07	0.19	0.560478	no
YOR043W	WHI2	15	410870	412330	W		Protein required for full activation of the general stress response; required with binding partner Psr1p, possibly through Msn2p dephosphorylation; regulates growth during the diauxic shift; negative regulator of G1 cyclin expression; SWAT-GFP, seamless-GFP and mCherry fusion proteins localize to the cell periphery	12.1887	-0.0153081	0.636499	0.846752	12.9	-0.07	0.27	0.64333	no
YOR086C	TCB1	15	483219	486779	C	tricalbin	Lipid-binding ER protein involved in ER-plasma membrane tethering; one of 6 proteins (Ist2p, Scs2p, Scs22p, Tcb1p, Tcb2p, Tcb3p) that connect ER to plasma membrane and regulate PI4P levels by controlling access of Sac1p phosphatase to its substrate PI4P in PM; contains 3 calcium and lipid binding domains; non-tagged protein also localizes to mitochondria; C-termini of Tcb1p, Tcb2p and Tcb3p inter…	13.3886	0.00818443	0.815819	0.929895	14.53	-0.07	0.37	0.725985	no
YOR098C	NUP1	15	507948	511178	C	FG-nucleoporin NUP1	FG-nucleoporin component of central core of the nuclear pore complex; contributes directly to nucleocytoplasmic transport and maintenance of thenuclear pore complex (NPC) permeability barrier; possible karyopherin release factor that accelerates release of karyopherin-cargo complexes after transport across NPC; both NUP1 and NUP60 are homologous to human NUP153	13.1323	-0.0368924	0.303397	0.608168	12.178	-0.07	0.45	0.78169	no
YOR122C	PFY1	15	552298	552887	C	profilin|CLS5|PRF1	Profilin; binds actin, phosphatidylinositol 4,5-bisphosphate, and polyproline regions; involved in cytoskeleton organization; required for normal timing of actin polymerization in response to thermal stress; protein abundance increases in response to DNA replication stress; highly conserved protein; human PFN1 (profilin 1) complements temperature sensitive pfy1 mutants, PFN1 mutations are a rare …	13.4179	-0.0857335	0.00869697	0.0757202	12.443	-0.07	0.77	0.925	no
YOR163W	DDP1	15	642741	643307	W	polyphosphatase DDP1	Polyphosphate phosphatase; hydrolyzes diphosphorylated inositol polyphosphates and diadenosine polyphosphates; high specificity for diadenosine hexa- and pentaphosphates; contains endopolyphosphatase activity with a high affinity for polyphosphates, an activity also observed for its human DIPP homologs; possesses mRNA decapping activity; nudix hydrolase family member; protein abundance increases …	10.5162	-0.0584088	0.161	0.442014	13.331	-0.07	0.59	0.86431	no
YPL037C	EGD1	16	481428	481901	C		Subunit beta1 of the nascent polypeptide-associated complex (NAC); involved in protein targeting, associated with cytoplasmic ribosomes; enhances DNA binding of the Gal4p activator; homolog of human BTF3b; EGD1 has a paralog, BTT1, that arose from the whole genome duplication	14.4151	-0.0675233	0.0737532	0.288938	13.818	-0.07	0.5	0.813442	no
YPL059W	GRX5	16	444579	445031	W	monothiol glutaredoxin GRX5	Glutathione-dependent oxidoreductase; mitochondrial matrix protein involved at an early step in the biogenesis of iron-sulfur centers along with Bol1p; hydroperoxide and superoxide-radical responsive; monothiol glutaredoxin subfamily member along with Grx3p and Grx4p	11.2028	0.0256667	0.476042	0.744665	13.318	-0.07	0.7	0.900539	no
YPL084W	BRO1	16	394038	396572	W	NPI3|ASI6|VPS31|LPF2	Cytoplasmic class E vacuolar protein sorting (VPS) factor; coordinates deubiquitination in the multivesicular body (MVB) pathway by recruiting Doa4p to endosomes	11.6059	0.0388051	0.396659	0.688505	12.018	-0.07	0.34	0.701673	no
YPR182W	SMX3	16	900194	900454	W	mRNA splicing protein SMX3|Sm F|SmF	Core Sm protein Sm F; part of heteroheptameric complex (with Smb1p, Smd1p, Smd2p, Smd3p, Sme1p, and Smx2p) that is part of the spliceosomal U1, U2, U4, and U5 snRNPs; homolog of human Sm F	8.29268	-0.0948386	0.103542	0.349903	13.83	-0.07	0.59	0.86431	no
YBL059C-A	CMC2	2	110125	110539	C		Protein involved in respiratory chain complex assembly or maintenance; protein of the mitochondrial intermembrane space; contains twin Cx9C motifs that can form coiled coil-helix-coiled-coil helix fold	9.11313	0.0264456	0.606449	0.82665	14.273	-0.06	0.32	0.685525	no
YBR009C	HHF1	2	255373	255684	C	histone H4	Histone H4; core histone protein required for chromatin assembly and chromosome function; one of two identical histone proteins (see also HHF2); contributes to telomeric silencing; N-terminal domain involved in maintaining genomic integrity	13.7976	-0.0888459	0.0633142	0.261577	15.141	-0.06	0.21	0.586731	no
YBR057C	MUM2	2	352193	353293	C	SPOT8	Protein essential for meiotic DNA replication and sporulation; cytoplasmic protein; subunit of the MIS complex which controls mRNA methylation during during the induction of sporulation; also interacts with Orc2p, which is a component of the origin recognition complex	10.9666	0.0147421	0.676405	0.866085	12.831	-0.06	0.99	0.992683	no
YBR059C	AKL1	2	356861	360187	C	serine/threonine protein kinase AKL1	Ser-Thr protein kinase; member (with Ark1p and Prk1p) of the Ark kinase family; involved in endocytosis and actin cytoskeleton organization	12.2806	0.0183574	0.669502	0.86512	12.158	-0.06	0.39	0.735688	no
YBR106W	PHO88	2	452658	453224	W	SND3	Protein involved in SRP-independent targeting of substrates to the ER; component of an alternative ER targeting pathway that has partial functional redundancy with the GET pathway; preference for substrates with downstream transmembrane domains; interacts with Snd1p, Env10p/Snd2p, and Sec61p-translocon subunits; can compensate for loss of SRP; role in phosphate transport, interacting with pho88, …	14.3188	-0.0794655	0.0574042	0.24957	14.792	-0.06	0.043	0.262665	no
YCR009C	RVS161	3	130745	131542	C	amphiphysin-like protein RVS161|SPE161|FUS7|END6	Amphiphysin-like lipid raft protein; N-BAR domain protein that interacts with Rvs167p and regulates polarization of the actin cytoskeleton, endocytosis, cell polarity, cell fusion and viability following starvation or osmotic stress	12.5995	-0.00595709	0.841795	0.938873	15.229	-0.06	0.13	0.470909	no
YCR066W	RAD18	3	231500	232963	W	E3 ubiquitin-protein ligase RAD18	E3 ubiquitin ligase; forms heterodimer with Rad6p to monoubiquitinate PCNA-K164; heterodimer binds single-stranded DNA and has single-stranded DNA dependent ATPase activity; required for postreplication repair; SUMO-targeted ubiquitin ligase (STUbl) that contains a SUMO-interacting motif (SIM) which stimulates its ubiquitin ligase activity towards the sumoylated form of PCNA	9.81224	0.078478	0.0568403	0.248191	11.525	-0.06	0.23	0.607238	no
YDL150W	RPC53	4	183343	184611	W	DNA-directed RNA polymerase III subunit C53|C53|RPC4	RNA polymerase III subunit C53	12.2831	-0.0256326	0.500558	0.760219	11.963	-0.06	0.52	0.831358	no
YDL165W	CDC36	4	164290	164865	W	CCR4-NOT core subunit CDC36|NOT2|DNA19	Component of the CCR4-NOT core complex, involved in mRNA decapping; this complex has multiple roles in regulating mRNA levels including regulation of transcription and destabilizing mRNAs through deadenylation; basal transcription factor	10.7265	-0.0323581	0.424297	0.709421	12.766	-0.06	0.63	0.879112	no
YDR167W	TAF10	4	789449	790069	W	TafII25|TAF25|TAF23	Subunit (145 kDa) of TFIID and SAGA complexes; involved in RNA polymerase II transcription initiation and in chromatin modification	11.0648	-0.0506634	0.218683	0.519377	14.208	-0.06	0.22	0.594161	no
YDR172W	SUP35	4	808324	810381	W	translation termination factor GTPase eRF3|eRF3|[PSI(+)]|[PSI]|SUP36|SUP2|SUF12|SAL3|PNM2|GST1	Translation termination factor eRF3; has a role in mRNA deadenylation and decay; altered protein conformation creates the [PSI(+)] prion that modifies cellular fitness, alters translational fidelity by affecting reading frame selection, and results in a nonsense suppressor phenotype; many stress-response genes are repressed in the presence of [PSI(+)]	14.7211	-0.0539606	0.0548818	0.242398	14.82	-0.06	0.057	0.310147	no
YDR226W	ADK1	4	916486	917154	W	adenylate kinase ADK1|AKY2|AKY1	Adenylate kinase, required for purine metabolism; localized to the cytoplasm and the mitochondria; lacks cleavable signal sequence; protein abundance increases in response to DNA replication stress; mutations affecting Adk1p catalytic activity deregulate expression of phosphate utilization genes PHO5 and PHO84; human homolog AK1 can complement yeast adk1 mutant	14.5041	-0.0538414	0.079634	0.301747	14.386	-0.06	0.95	0.979109	no
YDR312W	SSF2	4	1087581	1088942	W	rRNA-binding ribosome biosynthesis protein	Protein required for ribosomal large subunit maturation; functionally redundant with Ssf1p; member of the Brix family; SSF2 has a paralog, SSF1, that arose from the whole genome duplication	11.6771	0.00748006	0.83929	0.937825	13.384	-0.06	0.32	0.685525	no
YDR485C	VPS72	4	1424820	1427207	C	SWC2	Htz1p-binding component of the SWR1 complex; exchanges histone variant H2AZ (Htz1p) for chromatin-bound histone H2A; may function as a lock that prevents removal of H2AZ from nucleosomes; required for vacuolar protein sorting	11.6947	0.0442289	0.166462	0.450498	11.265	-0.06	0.7	0.900539	no
YDR487C	RIB3	4	1428354	1428980	C	3,4-dihydroxy-2-butanone-4-phosphate synthase RIB3	3,4-dihydroxy-2-butanone-4-phosphate synthase (DHBP synthase); required for riboflavin biosynthesis from ribulose-5-phosphate, also has an unrelated function in mitochondrial respiration	12.8405	-0.000792146	0.983599	0.99373	14.172	-0.06	0.62	0.874619	no
YEL054C	RPL12A	5	52721	53218	C	uL11|ribosomal 60S subunit protein L12A|L11|YL23|L15A|L12A	Ribosomal 60S subunit protein L12A; rpl12a rpl12b double mutant exhibits slow growth and slow translation; homologous to mammalian ribosomal protein L12 and bacterial L11; RPL12A has a paralog, RPL12B, that arose from the whole genome duplication	15.1546	-0.0695962	0.0209484	0.136687	12.849	-0.06	0.69	0.897139	no
YER174C	GRX4	5	538434	539168	C	monothiol glutaredoxin GRX4	Glutathione-dependent oxidoreductase; hydroperoxide and superoxide-radical responsive; monothiol glutaredoxin subfamily member along with Grx3p and Grx5p; protects cells from oxidative damage; with Grx3p, binds to Aft1p in iron-replete conditions, promoting its dissociation from promoters; mutant has increased aneuploidy tolerance; transcription regulated by Yap5p; GRX4 has a paralog, GRX3, that …	11.0416	-0.0206113	0.630977	0.843306	13.15	-0.06	0.41	0.7494	no
YGR029W	ERV1	7	543553	544205	W	flavin-linked sulfhydryl oxidase	Flavin-linked sulfhydryl oxidase of the mitochondrial IMS; N-terminus is an intrinsically disordered domain that in the cytosol helps target Erv1p to mitochondria, and in the intermembrane space oxidizes Mia40p as part of a disulfide relay system that promotes intermembrane space retention of imported proteins; functional ortholog of human GFER (ALR); human GFER carrying N-terminal 21 amino acids…	10.9841	0.0274792	0.501016	0.760219	13.831	-0.06	0.79	0.93643	no
YGR204W	ADE3	7	905934	908774	W	trifunctional formate-tetrahydrofolate ligase/methenyltetrahydrofolate cyclohydrolase/methylenetetrahydrofolate dehydrogenase ADE3	Cytoplasmic trifunctional enzyme C1-tetrahydrofolate synthase; involved in single carbon metabolism and required for biosynthesis of purines, thymidylate, methionine, and histidine; null mutation causes auxotrophy for adenine and histidine	14.2065	0.0222833	0.573604	0.806915	14.232	-0.06	0.18	0.549764	no
YHR042W	NCP1	8	190543	192618	W	CPR1	NADP-cytochrome P450 reductase; involved in ergosterol biosynthesis; associated and coordinately regulated with Erg11p	13.2754	-0.0297743	0.443746	0.723736	13.474	-0.06	0.21	0.586731	no
YHR076W	PTC7	8	251101	252225	W	type 2C protein phosphatase PTC7	Type 2C serine/threonine protein phosphatase (PP2C); alternatively spliced to create two mRNA isoforms; protein from spliced form localizes to the mitochondria while the one from the unspliced form is localized to the nuclear envelope; activates coenzyme Q6 biosynthesis by dephosphorylation of demethoxy-Q6 hydroxylase Coq7p	11.3182	-0.0256884	0.465683	0.73748	13.399	-0.06	0.12	0.456388	no
YHR200W	RPN10	8	499079	499885	W	proteasome regulatory particle base subunit RPN10|SUN1|MCB1	Non-ATPase base subunit of the 19S RP of the 26S proteasome; N-terminus plays a role in maintaining the structural integrity of the regulatory particle (RP); binds selectively to polyubiquitin chains; homolog of the mammalian S5a protein	12.5184	-0.0851863	0.0158679	0.115303	12.473	-0.06	0.39	0.735688	no
YJL065C	DLS1	10	315054	315557	C		Subunit of ISW2/yCHRAC chromatin accessibility complex; ISW2/yCHRAC also includes Itc1p, Isw2p, and Dpb4p; involved in inheritance of telomeric silencing; DLS1 has a paralog, DPB3, that arose from the whole genome duplication	10.2404	0.0206535	0.650225	0.853179	14.505	-0.06	0.64	0.879112	no
YJR034W	PET191	10	496683	497009	W		Protein required for assembly of cytochrome c oxidase; exists as an oligomer; described as both an integral mitochondrial inner membrane protein facing the intermembrane space (IMS) and as a soluble IMS protein; contains a twin Cx9C motif; imported into the IMS via the MIA import machinery	8.599	-0.0351843	0.551851	0.793983	14.125	-0.06	0.59	0.86431	no
YKL206C	ADD66	11	49006	49809	C	POC2|PBA2	Protein involved in 20S proteasome assembly; forms a heterodimer with Pba1p that binds to proteasome precursors; interaction with Pba1p-Add66p may affect function of the mature proteasome and its role in maintaining respiratory metabolism; similar to human PAC2 constituent of the PAC1-PAC2 complex involved in proteasome assembly	10.5161	-0.0692275	0.0579554	0.250777	15.007	-0.06	0.54	0.841516	no
YKR076W	ECM4	11	582283	583395	W	S-glutathionyl-(chloro)hydroquinone reductase|GTO2	S-glutathionyl-(chloro)hydroquinone reductase (GS-HQR); glutathione transferase involved in cell-surface biosynthesis and architecture; catalyzes glutathione (GSH)-dependent reduction of GS-trichloro-p-hydroquinone to trichloro-p-hydroquinone; expression upregulated upon exposure to genotoxic agents, such as methyl methanesulfonate, cisplatin and bleomycin; not an essential gene; similar to YGR15…	9.29897	-0.119907	0.0411778	0.207919	13.853	-0.06	0.34	0.701673	no
YLR009W	RLP24	12	166537	167136	W	ATPase-activating ribosome biosynthesis protein	Essential protein required for ribosomal large subunit biogenesis; associated with pre-60S ribosomal subunits; stimulates the ATPase activity of Afg2p, which is required for release of Rlp24p from the pre-60S particle; has similarity to Rpl24Ap and Rpl24Bp	12.9219	0.00502592	0.894599	0.960168	15.976	-0.06	0.29	0.662346	no
YLR126C	YLR126C	12	394765	395520	C	putative amidotransferase	Putative glutamine amidotransferase; has Aft1p-binding motif in the promoter; may be involved in copper and iron homeostasis; YLR126C is not an essential protein; relocalizes from nucleus to cytoplasmic foci upon DNA replication stress	10.2457	-0.0456122	0.241191	0.544031	12.929	-0.06	0.093	0.408254	no
YLR153C	ACS2	12	445524	447575	C	acetate--CoA ligase ACS2	Acetyl-coA synthetase isoform; along with Acs1p, acetyl-coA synthetase isoform is the nuclear source of acetyl-coA for histone acetylation; mutants affect global transcription; required for growth on glucose; expressed under anaerobic conditions	14.7985	0.0509583	0.0757162	0.292644	14.438	-0.06	0.26	0.635283	no
YML022W	APT1	13	228937	229500	W	adenine phosphoribosyltransferase APT1	Adenine phosphoribosyltransferase; catalyzes the formation of AMP from adenine and 5-phosphoribosylpyrophosphate; involved in the salvage pathway of purine nucleotide biosynthesis; APT1 has a paralog, APT2, that arose from the whole genome duplication	12.9358	-0.097054	0.0141471	0.106427	14.897	-0.06	0.27	0.64333	no
YML117W	NAB6	13	34243	37647	W		Putative RNA-binding protein; associates with mRNAs encoding cell wall proteins in high-throughput studies; deletion mutants display increased sensitivity to some cell wall disrupting agents; expression negatively regulated by cAMP	12.6937	0.0421265	0.266606	0.570643	11.738	-0.06	0.55	0.84994	no
YMR086W	SEG1	13	439208	442090	W		Component of eisosome required for proper eisosome assembly; precedes Pil1p/Lsp1p during eisosome formation, controls eisosome length and shape; diffusely distributed, forms heterogeneous patches at plasma membrane in small buds, also found in medium and large buds; expression repressed by cAMP; similar to A. gossypii SEG gene and to S. pombe Sle1p, important for generating eisosomes; SEG1 has a …	11.7108	-0.0179528	0.672435	0.866085	12.855	-0.06	0.035	0.235455	no
YMR260C	TIF11	13	789378	789839	C		Translation initiation factor eIF1A; essential protein that forms a complex with Sui1p (eIF1) and the 40S ribosomal subunit and scans for the start codon; C-terminus associates with Fun12p (eIF5B); N terminus interacts with eIF2 and eIF3	14.231	0.00169568	0.949664	0.982652	13.57	-0.06	0.39	0.735688	no
YMR276W	DSK2	13	818827	819948	W		Nuclear-enriched ubiquitin-like polyubiquitin-binding protein; required for spindle pole body (SPB) duplication and for transit through the G2/M phase of the cell cycle; involved in proteolysis; interacts with the proteasome; protein abundance increases in response to DNA replication stress	12.9044	-0.0347408	0.450655	0.727495	14.76	-0.06	0.59	0.86431	no
YMR290C	HAS1	13	850074	851591	C	ATP-dependent RNA helicase HAS1	ATP-dependent RNA helicase; involved in the biogenesis of 40S and 60S ribosome subunits; localizes to both the nuclear periphery and nucleolus; highly enriched in nuclear pore complex fractions; constituent of 66S pre-ribosomal particles	13.5989	-0.0756273	0.044016	0.21489	13.361	-0.06	0.1	0.415064	no
YNL010W	YNL010W	14	613635	614360	W	putative phosphoric monoester hydrolase	Putative protein of unknown function; similar to phosphoserine phosphatases; green fluorescent protein (GFP)-fusion protein localizes to the cytoplasm and nucleus; homozygous diploid mutant shows an increase in glycogen accumulation	13.1455	-0.0396669	0.213432	0.51299	13.335	-0.06	0.14	0.488679	no
YNL099C	OCA1	14	438567	439283	C	putative tyrosine protein phosphatase OCA1	Putative protein tyrosine phosphatase; required for cell cycle arrest in response to oxidative damage of DNA	11.2411	-0.023737	0.472394	0.742101	13.527	-0.06	0.5	0.813442	no
YNL212W	VID27	14	247461	249809	W		Cytoplasmic protein of unknown function; possibly involved in vacuolar protein degradation; not essential for proteasome-dependent degradation of fructose-1,6-bisphosphatase (FBPase); null mutants exhibit normal growth; contains two PH-like domains	12.2261	-0.00208884	0.939243	0.97852	11.691	-0.06	0.83	0.948676	no
YNL277W	MET2	14	117349	118809	W	homoserine O-acetyltransferase	L-homoserine-O-acetyltransferase; catalyzes the conversion of homoserine to O-acetyl homoserine which is the first step of the methionine biosynthetic pathway	8.87154	0.153747	0.00734426	0.0667713	12.584	-0.06	0.64	0.879112	no
YOL077C	BRX1	15	185848	186723	C		Nucleolar protein; constituent of 66S pre-ribosomal particles; depletion leads to defects in rRNA processing and a block in the assembly of large ribosomal subunits; possesses a sigma(70)-like RNA-binding motif	13.3417	-0.0237493	0.461572	0.734407	14.003	-0.06	0.12	0.456388	no
YOL108C	INO4	15	111431	111886	C		Transcription factor involved in phospholipid synthesis; required for derepression of inositol-choline-regulated genes involved in phospholipid synthesis; forms a complex, with Ino2p, that binds the inositol-choline-responsive element through a basic helix-loop-helix domain	9.37855	0.0538209	0.223791	0.524397	11.669	-0.06	0.56	0.855189	no
YOL140W	ARG8	15	58759	60030	W	acetylornithine transaminase	Acetylornithine aminotransferase; catalyzes the fourth step in the biosynthesis of the arginine precursor ornithine	11.8561	0.0560322	0.146085	0.420571	13.119	-0.06	0.037	0.243223	no
YOR281C	PLP2	15	846269	847129	C		Protein that interacts with the CCT complex to stimulate actin folding; has similarity to phosducins; null mutant lethality is complemented by mouse phosducin-like protein MgcPhLP; CCT is short for chaperonin containing TCP-1; essential gene	12.0827	0.0310093	0.34711	0.651018	14.138	-0.06	0.26	0.635283	no
YPL023C	MET12	16	504339	506312	C	methylenetetrahydrofolate reductase (NAD(P)H) MET12	Protein with MTHFR activity in vitro; null mutant has no phenotype and is prototrophic for methionine; MET13 encodes major isozyme of methylenetetrahydrofolate reductase (MTHFR)	11.9233	0.00482453	0.877308	0.955137	12.777	-0.06	0.84	0.95129	no
YPL117C	IDI1	16	327864	328730	C	isopentenyl-diphosphate delta-isomerase IDI1|LPH10|BOT2	Isopentenyl diphosphate:dimethylallyl diphosphate isomerase; catalyzes an essential activation step in the isoprenoid biosynthetic pathway; required for viability; isopentenyl diphosphate:dimethylallyl diphosphate isomerase is also known as IPP isomerase	13.1701	-0.0479336	0.147391	0.42239	13.918	-0.06	0.15	0.507843	no
YPL127C	HHO1	16	308828	309604	C	histone H1	Histone H1, linker histone with roles in meiosis and sporulation; decreasing levels early in sporulation may promote meiosis, and increasing levels during sporulation facilitate compaction of spore chromatin; binds to promoters and within genes in mature spores; may be recruited by Ume6p to promoter regions, contributing to transcriptional repression outside of meiosis; suppresses DNA repair invo…	11.4733	-0.0318728	0.494874	0.757732	13.596	-0.06	0.35	0.714905	no
YPL170W	DAP1	16	228314	228772	W		Heme-binding protein; involved in regulation of cytochrome P450 protein Erg11p; damage response protein, related to mammalian membrane progesterone receptors; mutations lead to defects in telomeres, mitochondria, and sterol synthesis	10.1551	0.0663548	0.136817	0.408816	13.068	-0.06	0.88	0.960472	no
YPL178W	CBC2	16	212158	212784	W	CBP20|SAE1|MUD13	Small subunit of the heterodimeric cap binding complex with Sto1p; interacts with Npl3p, possibly to package mRNA for export from the nucleus; may have a role in telomere maintenance; contains an RNA-binding motif	11.9083	-0.00846121	0.792509	0.917433	13.988	-0.06	0.38	0.729577	no
YPL195W	APL5	16	176223	179021	W	YKS4	Delta adaptin-like subunit of the clathrin associated protein complex; functions in transport of alkaline phosphatase to the vacuole via the alternate pathway; suppressor of loss of casein kinase 1 function; the clathrin associated protein complex is also known as AP-3	12.8401	0.00758699	0.771231	0.910262	12.319	-0.06	0.46	0.790577	no
YPR019W	MCM4	16	596750	599551	W	MCM DNA helicase complex subunit MCM4|CDC54|HCD21	Essential helicase component of heterohexameric MCM2-7 complexes; MCM2-7 complexes bind pre-replication complexes on DNA and melt DNA prior to replication; forms an Mcm4p-6p-7p subcomplex; shows nuclear accumulation in G1; homolog of S. pombe Cdc21p	12.0391	-0.00380334	0.913304	0.970469	12.062	-0.06	0.81	0.94203	no
YPR020W	ATP20	16	599870	600217	W	F1F0 ATP synthase subunit g	Subunit g of the mitochondrial F1F0 ATP synthase; reversibly phosphorylated on two residues; unphosphorylated form is required for dimerization of the ATP synthase complex, which in turn determines oligomerization of the complex and the shape of inner membrane cristae	10.426	-0.0127535	0.797927	0.919952	13.843	-0.06	0.15	0.507843	no
YPR035W	GLN1	16	642208	643320	W	glutamate--ammonia ligase	Glutamine synthetase (GS); synthesizes glutamine from glutamate and ammonia; with Glt1p, forms the secondary pathway for glutamate biosynthesis from ammonia; expression regulated by nitrogen source and by amino acid limitation; forms filaments of back-to-back stacks of cylindrical homo-decamers at low pH, leading to enzymatic inactivation and storage during states of advanced cellular starvation;…	14.7502	0.00655009	0.839593	0.937825	13.87	-0.06	0.014	0.13683	no
YPR174C	YPR174C	16	888043	888708	C		Protein of unknown function; green fluorescent protein (GFP)-fusion protein localizes to the nuclear periphery; potential Cdc28p substrate; binds phosphatidylinositols and phosphatidylethanolamine in a large-scale study; relative distribution to foci at the nuclear periphery increases upon DNA replication stress; YPR174C has a paralog, NBP1, that arose from the whole genome duplication	9.6561	-0.0358623	0.46315	0.7359	14.448	-0.06	0.85	0.951383	no
YAL059W	ECM1	1	36509	37147	W		Pre-ribosomal factor involved in 60S ribosomal protein subunit export; associates with the pre-60S particle; shuttles between the nucleus and cytoplasm	11.6829	-0.0823432	0.0613835	0.256822	14.448	-0.05	0.28	0.649821	no
YBL033C	RIB1	2	158656	159693	C	GTP cyclohydrolase II	GTP cyclohydrolase II; catalyzes the first step of the riboflavin biosynthesis pathway	11.3181	-0.0159888	0.696836	0.878451	13.491	-0.05	0.64	0.879112	no
YBR014C	GRX7	2	266725	267336	C	glutathione-disulfide reductase GRX7	Cis-golgi localized monothiol glutaredoxin; more similar in activity to dithiol than other monothiol glutaredoxins; involved in the oxidative stress response; does not bind metal ions; GRX7 has a paralog, GRX6, that arose from the whole genome duplication	11.1253	-0.00472454	0.894137	0.96003	13.681	-0.05	0.43	0.76754	no
YBR062C	YBR062C	2	365976	366600	C		Protein of unknown function that interacts with Msb2p; may play a role in activation of the filamentous growth pathway	10.0596	0.0452158	0.29475	0.601307	11.874	-0.05	0.72	0.906122	no
YBR089C-A	NHP6B	2	426190	426489	C	high-mobility group nucleosome-binding protein|YBR090C-A	High-mobility group (HMG) protein; binds to and remodels nucleosomes; involved in recruiting FACT and other chromatin remodelling complexes to the chromosomes; functionally redundant with Nhp6Ap; required for transcriptional initiation fidelity of some tRNA genes; homologous to mammalian HMGB1 and HMGB2; NHP6B has a paralog, NHP6A, that arose from the whole genome duplication	11.1732	-0.0841496	0.0684533	0.27472	14.716	-0.05	0.68	0.894919	no
YBR139W	YBR139W	2	515664	517190	W	carboxypeptidase C	Putative serine type carboxypeptidase; role in phytochelatin synthesis; green fluorescent protein (GFP)-fusion protein localizes to the vacuole; expression induced by nitrogen limitation in a GLN3, GAT1-independent manner	12.0337	-0.083153	0.0611348	0.256822	13.815	-0.05	0.19	0.560478	no
YBR216C	YBP1	2	655576	657600	C		Protein involved in cellular response to oxidative stress; required for oxidation of specific cysteine residues of transcription factor Yap1p, resulting in nuclear localization of Yap1p in response to stress; YBP1 has a paralog, YBP2, that arose from the whole genome duplication	11.0383	0.0223397	0.53543	0.779904	12.38	-0.05	0.53	0.837523	no
YCL032W	STE50	3	63441	64481	W		Adaptor protein for various signaling pathways; involved in mating response, invasive/filamentous growth, osmotolerance; acts as an adaptor that links G protein-associated Cdc42p-Ste20p complex to the effector Ste11p to modulate signal transduction	10.4595	0.0290721	0.49172	0.75624	13.79	-0.05	0.56	0.855189	no
YCR051W	YCR051W	3	214071	214739	W		Putative protein of unknown function; green fluorescent protein (GFP)-fusion protein localizes to the cytoplasm and nucleus; contains ankyrin (Ank) repeats; YCR051W is not an essential gene	12.1897	-0.078562	0.0244285	0.151167	12.574	-0.05	0.12	0.456388	no
YDL006W	PTC1	4	439909	440754	W	type 2C protein phosphatase PTC1|TPD1|KCS2|CWH47	Type 2C protein phosphatase (PP2C); dephosphorylates Hog1p, inactivating osmosensing MAPK cascade; involved in Fus3p activation during pheromone response; deletion affects precursor tRNA splicing, mitochondrial inheritance, and sporulation	10.6821	-0.00660461	0.870816	0.952766	14.833	-0.05	0.29	0.662346	no
YDL045W-A	MRP10	4	372248	372535	W	mitochondrial 37S ribosomal protein YmS-T|YmS-T	Mitochondrial ribosomal protein of the small subunit; contains twin cysteine-x9-cysteine motifs; oxidized by Mia40p during import into mitochondria	9.89479	0.023736	0.586075	0.81616	13.922	-0.05	0.18	0.549764	no
YDL105W	NSE4	4	272389	273597	W	Smc5-Smc6 complex subunit NSE4|QRI2	Component of the SMC5-SMC6 complex; this complex plays a key role in the removal of X-shaped DNA structures that arise between sister chromatids during DNA replication and repair	9.64257	0.00592664	0.900086	0.963003	13.082	-0.05	0.29	0.662346	no
YDL182W	LYS20	4	133437	134723	W	homocitrate synthase LYS20	Homocitrate synthase isozyme and functions in DNA repair; catalyzes the condensation of acetyl-CoA and alpha-ketoglutarate to form homocitrate, which is the first step in the lysine biosynthesis pathway; LYS20 has a paralog, LYS21, that arose from the whole genome duplication	13.3732	0.00579813	0.886543	0.958058	12.969	-0.05	0.39	0.735688	no
YDL198C	GGC1	4	103649	104551	C	SHM1|YHM1	Mitochondrial GTP/GDP transporter; essential for mitochondrial genome maintenance; has a role in mitochondrial iron transport; member of the mitochondrial carrier family	12.5977	0.0145267	0.676122	0.866085	14.806	-0.05	0.033	0.229758	no
YDR071C	PAA1	4	588827	589402	C	polyamine acetyltransferase	Polyamine acetyltransferase; acetylates polyamines (e.g. putrescine, spermidine, spermine) and also aralkylamines (e.g. tryptamine, phenylethylamine); may be involved in transcription and/or DNA replication	12.6319	0.0252394	0.466454	0.737485	13.644	-0.05	0.18	0.549764	no
YDR092W	UBC13	4	629876	630605	W	E2 ubiquitin-conjugating protein UBC13	E2 ubiquitin-conjugating enzyme; involved in the error-free DNA postreplication repair pathway; interacts with Mms2p to assemble ubiquitin chains at the Ub Lys-63 residue; DNA damage triggers redistribution from the cytoplasm to the nucleus	11.0512	0.0374032	0.354133	0.656372	15.058	-0.05	0.34	0.701673	no
YDR171W	HSP42	4	806621	807748	W	heat shock protein HSP42	Small heat shock protein (sHSP) with chaperone activity; forms barrel-shaped oligomers that suppress unfolded protein aggregation; involved in cytoskeleton reorganization after heat shock; protein abundance increases and forms cytoplasmic foci in response to DNA replication stress	11.1881	0.117662	0.0514641	0.232869	11.41	-0.05	0.77	0.925	no
YDR272W	GLO2	4	1009010	1009834	W	hydroxyacylglutathione hydrolase GLO2	Cytoplasmic glyoxalase II; catalyzes the hydrolysis of S-D-lactoylglutathione into glutathione and D-lactate; GLO2 has a paralog, GLO4, that arose from the whole genome duplication	12.1033	0.0349463	0.241823	0.544907	14.546	-0.05	0.023	0.184427	no
YDR305C	HNT2	4	1072746	1073488	C	bis(5'-adenosyl)-triphosphatase|APH1	Dinucleoside triphosphate hydrolase; has similarity to the tumor suppressor FHIT and belongs to the histidine triad (HIT) superfamily of nucleotide-binding proteins	9.87454	0.0434449	0.328195	0.634484	13.93	-0.05	0.53	0.837523	no
YDR330W	UBX5	4	1127872	1129374	W		UBX domain-containing protein that interacts with Cdc48p; ubiquitin regulatory X is also known as UBX	11.1355	0.0126595	0.679614	0.867224	13.353	-0.05	0.37	0.725985	no
YDR430C	CYM1	4	1325501	1328470	C	MOP112	Lysine-specific metalloprotease of the pitrilysin family; metalloprotease of the intermembrane space; degrades proteins and presequence peptides cleaved from imported proteins; required for normal mitochondrial morphology	11.7519	0.027146	0.384759	0.679499	13.499	-0.05	0.49	0.808344	no
YDR449C	UTP6	4	1357580	1358902	C	snoRNA-binding rRNA-processing protein UTP6	Nucleolar protein; component of the small subunit (SSU) processome containing the U3 snoRNA that is involved in processing of pre-18S rRNA	12.3363	-0.0598573	0.147785	0.422926	12.233	-0.05	0.79	0.93643	no
YDR464W	SPP41	4	1388872	1393179	W		Protein of unknown function; involved in negative regulation of expression of spliceosome components PRP4 and PRP3; relocalizes to the cytosol in response to hypoxia	12.3758	-0.00376218	0.935851	0.977536	12.203	-0.05	0.57	0.85682	no
YDR468C	TLG1	4	1398026	1398700	C		Essential t-SNARE that mediates fusion of vesicles with the late Golgi; forms a complex with Tlg2p and Vti1p; mediates fusion of endosome-derived vesicles with the late Golgi; binds the docking complex VFT (Vps fifty-three) through interaction with Vps51p	10.8274	-0.0306199	0.430154	0.717132	11.416	-0.05	0.94	0.976966	no
YDR477W	SNF1	4	1412373	1414274	W	AMP-activated serine/threonine-protein kinase catalytic subunit SNF1|PAS14|HAF3|GLC2|CCR1|CAT1	AMP-activated S/T protein kinase; forms a complex with Snf4p and members of the Sip1p/Sip2p/Gal83p family; required for transcription of glucose-repressed genes, thermotolerance, sporulation, and peroxisome biogenesis; regulates nucleocytoplasmic shuttling of Hxk2p; regulates filamentous growth and acts as a non-canonical GEF, activating Arf3p during invasive growth; SUMOylation by Mms21p inhibit…	11.8207	0.017126	0.589545	0.817041	13.287	-0.05	0.41	0.7494	no
YER018C	SPC25	5	191959	192624	C	kinetochore-associated Ndc80 complex subunit SPC25	Component of the kinetochore-associated Ndc80 complex; involved in chromosome segregation, spindle checkpoint activity, and kinetochore clustering; evolutionarily conserved; other members include Ndc80p, Nuf2p, Spc24p, and Spc25p	9.10753	-0.0947004	0.0697125	0.277836	12.653	-0.05	0.42	0.758577	no
YER114C	BOI2	5	390590	393712	C	BEB1	Protein implicated in polar growth, functionally redundant with Boi1p; interacts with bud-emergence protein Bem1p; contains an SH3 (src homology 3) domain and a PH (pleckstrin homology) domain; BOI2 has a paralog, BOI1, that arose from the whole genome duplication	12.0173	-0.0446943	0.264521	0.567816	12.453	-0.05	0.87	0.957629	no
YER117W	RPL23B	5	396769	397653	W	uL14|ribosomal 60S subunit protein L23B|L14|YL32|L23B|L17aB	Ribosomal 60S subunit protein L23B; homologous to mammalian ribosomal protein L23 and bacterial L14; RPL23B has a paralog, RPL23A, that arose from the whole genome duplication	15.2703	-0.119782	0.0100989	0.0843294	13.169	-0.05	0.15	0.507843	no
YER156C	YER156C	5	483325	484341	C		Putative protein of unknown function; interacts with Hsp82p and copurifies with Ipl1p; expression is copper responsive and downregulated in strains deleted for MAC1, a copper-responsive transcription factor; similarity to mammalian MYG1	12.548	-0.134162	0.000245074	0.00532227	14.752	-0.05	0.018	0.159658	no
YFR014C	CMK1	6	172537	173877	C	calmodulin-dependent protein kinase CMK1	Calmodulin-dependent protein kinase; may play a role in stress response, many Ca++/calmodulin dependent phosphorylation substrates demonstrated in vitro, amino acid sequence similar to mammalian Cam Kinase II; CMK1 has a paralog, CMK2, that arose from the whole genome duplication	10.5513	-0.0793537	0.0547899	0.24226	14.559	-0.05	0.42	0.758577	no
YGL101W	YGL101W	7	312193	312840	W		Protein of unknown function; non-essential gene; interacts with the DNA helicase Hpr5p; YGL101W has a paralog, YBR242W, that arose from the whole genome duplication	10.9457	0.00241792	0.950672	0.982652	13.785	-0.05	0.89	0.962463	no
YGL157W	ARI1	7	209006	210049	W	carbonyl reductase (NADPH-dependent) ARI1	NADPH-dependent aldehyde reductase; utilizes aromatic and alophatic aldehyde substrates; member of the short-chain dehydrogenase/reductase superfamily	12.4948	-0.0402289	0.268426	0.572627	14.423	-0.05	0.2	0.571744	no
YGL197W	MDS3	7	124698	129161	W		Putative component of the TOR regulatory pathway; negative regulator of early meiotic gene expression; required, with Pmd1p, for growth under alkaline conditions; has an N-terminal kelch-like domain; MDS3 has a paralog, PMD1, that arose from the whole genome duplication	11.8309	-0.0317656	0.460198	0.733635	13.518	-0.05	0.33	0.695443	no
YGL201C	MCM6	7	117854	120907	C	MCM DNA helicase complex subunit MCM6	Protein involved in DNA replication; component of the Mcm2-7 hexameric helicase complex that binds chromatin as a part of the pre-replicative complex; forms a subcomplex with Mcm4p and Mcm7p	11.9455	-0.0430148	0.292002	0.597396	11.072	-0.05	0.38	0.729577	no
YGR126W	YGR126W	7	745835	746527	W		Putative protein of unknown function; green fluorescent protein (GFP)-fusion protein localizes to both the cytoplasm and the nucleus and is induced in response to the DNA-damaging agent MMS	8.02627	0.0470968	0.462349	0.73483	12.845	-0.05	0.37	0.725985	no
YGR167W	CLC1	7	832456	833157	W	SCD4	Clathrin light chain; subunit of the major coat protein involved in intracellular protein transport and endocytosis; regulates endocytic progression; thought to regulate clathrin function; the clathrin triskelion is a trimeric molecule composed of three heavy chains that radiate from a vertex and three light chains which bind noncovalently near the vertex of the triskelion	12.8684	0.0260769	0.370251	0.668381	13.031	-0.05	0.55	0.84994	no
YGR208W	SER2	7	911883	912812	W	phosphoserine phosphatase	Phosphoserine phosphatase of the phosphoglycerate pathway; involved in serine and glycine biosynthesis, expression is regulated by the available nitrogen source	11.9619	-0.0365011	0.28878	0.593547	14.216	-0.05	0.13	0.470909	no
YGR277C	CAB4	7	1045644	1046561	C	putative pantetheine-phosphate adenylyltransferase	Subunit of the CoA-Synthesizing Protein Complex (CoA-SPC); subunits of this complex are: Cab2p, Cab3p, Cab4p, Cab5p, Sis2p and Vhs3p; probable pantetheine-phosphate adenylyltransferase (PPAT); PPAT catalyzes the fourth step in the biosynthesis of coenzyme A from pantothenate; null mutant lethality is complemented by E. coli coaD (encoding PPAT) and by human COASY	11.0729	-0.00953102	0.807673	0.924639	13.09	-0.05	0.51	0.821966	no
YHR005C-A	TIM10	8	115620	115901	C	protein transporter TIM10|MRS11	Essential protein of the mitochondrial intermembrane space; forms a complex with Tim9p (TIM10 complex) that delivers hydrophobic proteins to the TIM22 complex for insertion into the inner membrane	12.0344	-0.00830815	0.795972	0.918733	15.147	-0.05	0.36	0.720556	no
YHR128W	FUR1	8	362115	362765	W	uracil phosphoribosyltransferase	Uracil phosphoribosyltransferase; synthesizes UMP from uracil; involved in the pyrimidine salvage pathway	13.5037	0.0169857	0.573938	0.806991	14.012	-0.05	0.26	0.635283	no
YHR148W	IMP3	8	393534	394085	W	snoRNA-binding rRNA-processing protein IMP3	Component of the SSU processome; SSU processome is required for pre-18S rRNA processing, essential protein that interacts with Mpp10p and mediates interactions of Imp4p and Mpp10p with U3 snoRNA	10.7929	-0.0747312	0.0441114	0.214954	13.968	-0.05	0.29	0.662346	no
YHR158C	KEL1	8	413685	417179	C		Protein required for proper cell fusion and cell morphology; forms a complex with Bud14p and Kel2p that regulates Bnr1p (formin) to affect actin cable assembly, cytokinesis, and polarized growth; functions in a complex with Kel2p to negatively regulate mitotic exit, interacts with Tem1p and Lte1p; localizes to regions of polarized growth; potential Cdc28p substrate	11.903	0.0377384	0.277584	0.580064	12.677	-0.05	0.11	0.438983	no
YIL010W	DOT5	9	334882	335529	W	thioredoxin peroxidase DOT5	Nuclear thiol peroxidase; functions as an alkyl-hydroperoxide reductase during post-diauxic growth	10.4757	-0.0901169	0.0385664	0.199775	14.821	-0.05	0.67	0.888986	no
YIL021W	RPB3	9	312905	313861	W	DNA-directed RNA polymerase II core subunit RPB3|B44	RNA polymerase II third largest subunit B44; part of central core; similar to prokaryotic alpha subunit	12.1898	-0.0202006	0.515078	0.7677	13.703	-0.05	0.14	0.488679	no
YIL027C	EMC5	9	303679	304104	C	KRE27	Member of conserved ER transmembrane complex; required for efficient folding of proteins in the ER; null mutant displays induction of the unfolded protein response, and also shows K1 killer toxin resistance; homologous to worm B0334.15/EMC-5, fly CG15168, human MMGT	10.8991	0.0132307	0.732455	0.894585	14.082	-0.05	0.41	0.7494	no
YIL034C	CAP2	9	289226	290089	C	F-actin-capping protein subunit beta	Beta subunit of the capping protein heterodimer (Cap1p and Cap2p); capping protein (CP) binds to the barbed ends of actin filaments preventing further polymerization; localized predominantly to cortical actin patches; protein increases in abundance and relocalizes from bud neck to plasma membrane upon DNA replication stress	12.0763	-0.0328586	0.431402	0.717549	13.527	-0.05	0.42	0.758577	no
YIL044C	AGE2	9	272950	273846	C	SAT2	ADP-ribosylation factor (ARF) GTPase activating protein (GAP) effector; involved in Trans-Golgi-Network (TGN) transport; contains C2C2H2 cysteine/histidine motif	11.5365	-0.0143518	0.64172	0.849553	12.687	-0.05	0.33	0.695443	no
YIL095W	PRK1	9	183937	186369	W	serine/threonine protein kinase PRK1|PAK1	Protein serine/threonine kinase; regulates the organization and function of the actin cytoskeleton and reduces endocytic ability of cell through the phosphorylation of the Pan1p-Sla1p-End3p protein complex; PRK1 has a paralog, ARK1, that arose from the whole genome duplication	10.8628	0.0509451	0.258165	0.561717	13.347	-0.05	0.33	0.695443	no
YJL068C	YJL068C	10	313016	313915	C	S-formylglutathione hydrolase|SFGH	Esterase that can function as an S-formylglutathione hydrolase; non-essential intracellular esterase; may be involved in the detoxification of formaldehyde, which can be metabolized to S-formylglutathione; similar to human esterase D	11.5579	-0.0772745	0.0324723	0.17866	13.648	-0.05	0.088	0.401268	no
YJL159W	HSP150	10	120449	121690	W	heat shock protein HSP150|PIR2|ORE1|CCW7	O-mannosylated heat shock protein; secreted and covalently attached to the cell wall via beta-1,3-glucan and disulfide bridges; required for cell wall stability; induced by heat shock, oxidative stress, and nitrogen limitation; HSP150 has a paralog, PIR3, that arose from the whole genome duplication	15.5032	-0.0758785	0.0701951	0.27941	12.559	-0.05	0.46	0.790577	no
YJL179W	PFD1	10	88787	89116	W	prefolding complex chaperone subunit|GIM6	Subunit of heterohexameric prefoldin; prefoldin binds cytosolic chaperonin and transfers target proteins to it; involved in the biogenesis of actin and of alpha- and gamma-tubulin; prefoldin complex also localizes to chromatin of actively transcribed genes in the nucleus and facilitates transcriptional elongation	9.08274	-0.0733246	0.145726	0.420327	14.532	-0.05	0.43	0.76754	no
YJR099W	YUH1	10	615576	616286	W	ubiquitin-specific protease YUH1	Ubiquitin C-terminal hydrolase; cleaves ubiquitin-protein fusions to generate monomeric ubiquitin; hydrolyzes the peptide bond at the C-terminus of ubiquitin; also the major processing enzyme for the ubiquitin-like protein Rub1p	10.2955	0.046002	0.242955	0.546381	12.601	-0.05	0.31	0.678698	no
YJR133W	XPT1	10	672991	673620	W	xanthine phosphoribosyltransferase	Xanthine-guanine phosphoribosyl transferase; required for xanthine utilization and for optimal utilization of guanine	11.2851	-0.0848126	0.0330291	0.179955	14.976	-0.05	0.43	0.76754	no
YJR144W	MGM101	10	700882	701691	W	MGM9	Protein with a role in mitochondrial DNA recombinational repair; also involved in interstrand cross-link repair; binds to and catalyzes the annealing of single-stranded mtDNA; oligomerizes to form rings and filaments; related to Rad52-type recombination proteins, with limited overall similarity but sharing conserved functionally important residues; component of the mitochondrial nucleoid, require…	11.8535	-0.00887122	0.818354	0.930022	14.514	-0.05	0.11	0.438983	no
YKL022C	CDC16	11	394726	397248	C	anaphase promoting complex subunit CDC16	Subunit of the anaphase-promoting complex/cyclosome (APC/C); which is a ubiquitin-protein ligase required for degradation of anaphase inhibitors, including mitotic cyclins, during the metaphase/anaphase transition; required for sporulation; relocalizes to the cytosol in response to hypoxia	11.1158	-0.0490965	0.20857	0.508825	12.413	-0.05	0.76	0.921536	no
YKL063C	YKL063C	11	321015	321518	C		Putative protein of unknown function; green fluorescent protein (GFP)-fusion protein localizes to the Golgi	10.576	0.0397764	0.379045	0.676824	13.89	-0.05	0.18	0.549764	no
YKL128C	PMU1	11	200884	201771	C	putative phosphomutase	Putative phosphomutase; contains a region homologous to the active site of phosphomutases; overexpression suppresses the histidine auxotrophy of an ade3 ade16 ade17 triple mutant and the temperature sensitivity of a tps2 mutant	12.0699	-0.0248805	0.432305	0.718147	13.645	-0.05	0.23	0.607238	no
YKR014C	YPT52	11	465367	466071	C	Rab family GTPase YPT52	Endosomal Rab family GTPase; required for vacuolar protein sorting, endocytosis and multivesicular body (MVB) biogenesis and sorting; required for localization of the CORVET complex to endosomes; involved in autophagy and ionic stress tolerance; similar to Vps21p and Ypt53p; mammalian Rab5 homolog; protein abundance increases in response to DNA replication stress	12.1786	0.072523	0.00855631	0.0749491	14.473	-0.05	0.14	0.488679	no
YKR062W	TFA2	11	559666	560652	W	transcription factor TFIIE subunit TFA2	TFIIE small subunit; involved in RNA polymerase II transcription initiation	11.4579	-0.0402254	0.213247	0.51299	12.68	-0.05	0.41	0.7494	no
YLL021W	SPA2	12	100947	105347	W	PPF1|PEA1|FUS6	Component of the polarisome; functions in actin cytoskeletal organization during polarized growth; acts as a scaffold for Mkk1p and Mpk1p cell wall integrity signaling components; potential Cdc28p substrate; coding sequence contains length polymorphisms in different strains; SPA2 has a paralog, SPH1, that arose from the whole genome duplication	13.0849	0.0349052	0.387897	0.682356	13.146	-0.05	0.11	0.438983	no
YLR008C	PAM18	12	165577	166083	C	TIM14	Subunit of the import motor (PAM complex); the PAM complex is a component of the Translocase of the Inner Mitochondrial membrane (TIM23 complex); essential J-protein cochaperone that stimulates Ssc1p ATPase activity to drive import; inhibited by Pam16p	11.3132	-0.00259464	0.929897	0.975645	15.562	-0.05	0.44	0.773659	no
YLR133W	CKI1	12	408445	410193	W	bifunctional choline kinase/ethanolamine kinase CKI1	Choline kinase; catalyzes the first step in phosphatidylcholine synthesis via the CDP-choline (Kennedy pathway); exhibits some ethanolamine kinase activity contributing to phosphatidylethanolamine synthesis via the CDP-ethanolamine pathway; CKI1 has a paralog, EKI1, that arose from the whole genome duplication	11.1469	-0.0588162	0.183205	0.473438	12.284	-0.05	0.19	0.560478	no
YLR216C	CPR6	12	572096	573211	C	peptidylprolyl isomerase CPR6|CYP40	Peptidyl-prolyl cis-trans isomerase (cyclophilin); catalyzes the cis-trans isomerization of peptide bonds N-terminal to proline residues; plays a role in determining prion variants; binds to Hsp82p and contributes to chaperone activity; protein abundance increases in response to DNA replication stress	13.7318	-0.0554766	0.10434	0.350976	14.024	-0.05	0.068	0.341318	no
YLR244C	MAP1	12	625168	626331	C	methionine aminopeptidase MAP1	Methionine aminopeptidase; catalyzes the cotranslational removal of N-terminal methionine from nascent polypeptides; function is partially redundant with that of Map2p	13.6748	-0.0594908	0.103106	0.349455	13.627	-0.05	0.43	0.76754	no
YLR421C	RPN13	12	965090	965560	C	proteasome regulatory particle lid subunit RPN13	Subunit of the 19S regulatory particle of the 26S proteasome lid; acts as a ubiquitin receptor for the proteasome; null mutants accumulate ubiquitinated Gcn4p and display decreased 26S proteasome stability; protein abundance increases in response to DNA replication stress	11.7252	-0.000746422	0.97983	0.993529	12.843	-0.05	0.2	0.571744	no
YLR439W	MRPL4	12	1014491	1015450	W	mitochondrial 54S ribosomal protein YmL4|YmL4	Mitochondrial ribosomal protein of the large subunit; homolog of prokaryotic L29 ribosomal protein; located at the ribosomal tunnel exit	10.2631	-0.0256488	0.581569	0.812954	14.431	-0.05	0.24	0.618507	no
YMR041C	ARA2	13	350966	351973	C	D-arabinose 1-dehydrogenase (NAD(P)(+)) ARA2	NAD-dependent arabinose dehydrogenase; involved in biosynthesis of dehydro-D-arabinono-1,4-lactone; similar to plant L-galactose dehydrogenase	9.79094	-0.0332093	0.448338	0.725911	13.276	-0.05	0.81	0.94203	no
YMR128W	ECM16	13	523696	527499	W	ATP-dependent RNA helicase ECM16|DHR1	Essential DEAH-box ATP-dependent RNA helicase specific to U3 snoRNP; predominantly nucleolar in distribution; required for 18S rRNA synthesis	13.332	4.87146e-05	0.998745	0.999613	13.165	-0.05	0.22	0.594161	no
YMR236W	TAF9	13	742971	743444	W	chromatin modification protein|TafII17|TAF17	Subunit (17 kDa) of TFIID and SAGA complexes; involved in RNA polymerase II transcription initiation and in chromatin modification, similar to histone H3	11.0975	-0.00285623	0.93711	0.977714	13.413	-0.05	0.62	0.874619	no
YMR238W	DFG5	13	746353	747729	W	putative mannan endo-1,6-alpha-mannosidase	Putative mannosidase; essential glycosylphosphatidylinositol (GPI)-anchored membrane protein required for cell wall biogenesis in bud formation, involved in filamentous growth, homologous to Dcw1p	12.0065	-0.0512017	0.0788735	0.301006	13.179	-0.05	0.89	0.962463	no
YMR275C	BUL1	13	815651	818581	C	ubiquitin-ubiquitin ligase BUL1|SMM2|RDS1|DAG1	Ubiquitin-binding component of the Rsp5p E3-ubiquitin ligase complex; disruption causes temperature-sensitive growth, overexpression causes missorting of amino acid permeases; BUL1 has a paralog, BUL2, that arose from the whole genome duplication	11.6057	0.0226171	0.566179	0.801959	14.69	-0.05	0.43	0.76754	no
YNL244C	SUI1	14	187170	187496	C	translation initiation factor eIF1|RFR1|MOF2	Translation initiation factor eIF1; component of a complex involved in recognition of the initiator codon; modulates translation accuracy at the initiation phase	12.8531	-0.0755368	0.0196615	0.131328	13.143	-0.05	0.54	0.841516	no
YNL309W	STB1	14	52662	53924	W		Protein with role in regulation of MBF-specific transcription at Start; phosphorylated by Cln-Cdc28p kinases in vitro; unphosphorylated form binds Swi6p, which is required for Stb1p function; expression is cell-cycle regulated; STB1 has a paralog, YOL131W, that arose from the whole genome duplication	9.56227	0.00307352	0.956007	0.984425	12.334	-0.05	0.61	0.872873	no
YNR032C-A	HUB1	14	687243	687464	C	ubiquitin-like protein HUB1	Ubiquitin-like protein modifier; promotes alternative splicing of SRC1 pre-mRNA; binds non-covalently to the HIND domain of Snu66, may function in modification of Sph1p and Hbt1p, functionally complemented by the human or S. pombe ortholog; mechanism of Hub1p adduct formation not yet clear	8.39894	-0.052742	0.382889	0.679086	14	-0.05	0.98	0.99071	no
YNR034W	SOL1	14	690321	691286	W		Protein with a possible role in tRNA export; shows similarity to 6-phosphogluconolactonase non-catalytic domains but does not exhibit this enzymatic activity; homologous to Sol3p and Sol4p; SOL1 has a paralog, SOL2, that arose from the whole genome duplication; protein abundance increases in response to DNA replication stress	9.61562	0.011931	0.819048	0.930161	11.111	-0.05	0.44	0.773659	no
YNR046W	TRM112	14	707788	708195	W	RNA methylation protein TRM112	Protein involved in methylation of tRNA, rRNA, and translation factors; also involved in ribosome biogenesis; subunit of tRNA methyltransferase (MTase) complexes in combination with Trm9p and Trm11p; N7-methylates G1575 of 18S rRNA as complex with Bud23p; subunit of complex with Mtq2p that methylates Sup45p (eRF1) in the ternary complex eRF1-eRF3-GTP; relative distribution to the nucleus increase…	11.2086	-0.0379174	0.407764	0.69738	11.419	-0.05	0.47	0.794582	no
YOL051W	GAL11	15	234940	238185	W	MED15|ABE1|SPT13|SDS4|RAR3	Subunit of the RNA polymerase II mediator complex; associates with core polymerase subunits to form the RNA polymerase II holoenzyme; affects transcription by acting as target of activators and repressors; forms part of the tail domain of mediator	12.1778	0.0372902	0.333709	0.640012	10.66	-0.05	0.2	0.571744	no
YOL142W	RRP40	15	55558	56280	W	exosome non-catalytic core subunit RRP40|MTR14	Exosome non-catalytic core component; involved in 3'-5' RNA processing and degradation in both the nucleus and the cytoplasm; predicted to contain both S1 and KH RNA binding domains; mutations in the human homolog, EXOSC3, cause pontocerebellar hypoplasia with motor neuron degeneration	11.4299	-0.0437577	0.236419	0.539197	12.464	-0.05	0.28	0.649821	no
YOR021C	SFM1	15	372798	373439	C	protein-arginine N-methyltransferase SFM1	SPOUT methyltransferase; catalyzes omega-monomethylation of Rps3p on Arg-146; not an essential gene; predicted to be involved in rRNA processing and ribosome biogenesis and in biopolymer catabolism	12.2686	-0.074833	0.0675496	0.271852	14.229	-0.05	0.8	0.938406	no
YOR057W	SGT1	15	432186	433373	W	co-chaperone SGT1|YOR29-08	Cochaperone protein; regulates activity of adenylyl cyclase Cyr1p; involved in kinetochore complex assembly; associates with the SCF (Skp1p/Cdc53p/F box protein) ubiquitin ligase complex; acts as a linker between Skp1p and HSP90 complexes; protein abundance increases in response to DNA replication stress	11.5131	-0.00340944	0.91907	0.972888	13.742	-0.05	0.54	0.841516	no
YOR065W	CYT1	15	447439	448368	W	ubiquinol--cytochrome-c reductase catalytic subunit CYT1|YOR29-16|CTC1	Cytochrome c1; component of the mitochondrial respiratory chain; expression is regulated by the heme-activated, glucose-repressed Hap2p/3p/4p/5p CCAAT-binding complex	11.2649	0.0180011	0.704362	0.881644	12.2	-0.05	0.66	0.885699	no
YOR099W	KTR1	15	511825	513006	W	alpha-1,2-mannosyltransferase KTR1	Alpha-1,2-mannosyltransferase; involved in O- and N-linked protein glycosylation; type II membrane protein; member of the KRE2/MNT1 mannosyltransferase family; relocalizes from vacuole to cytoplasm upon DNA replication stress	13.1772	-0.0567596	0.0481569	0.226055	14.336	-0.05	0.3	0.669251	no
YOR280C	FSH3	15	844992	845792	C	putative serine hydrolase	Putative serine hydrolase; likely target of Cyc8p-Tup1p-Rfx1p transcriptional regulation; sequence is similar to S. cerevisiae Fsh1p and Fsh2p and the human candidate tumor suppressor OVCA2	10.5014	0.0316972	0.376441	0.673847	13.285	-0.05	0.28	0.649821	no
YOR304C-A	BIL1	15	888520	888750	C	EDO1	Protein that binds Bud6p and has a role in actin cable assembly; involved in the Bnr1p-dependent pathway of cable assembly; localizes to bud tip and bud neck	8.00294	-0.0962141	0.121107	0.381056	13.46	-0.05	0.9	0.965217	no
YOR371C	GPB1	15	1031489	1034182	C	KRH2	Multistep regulator of cAMP-PKA signaling; inhibits PKA downstream of Gpa2p and Cyr1p, thereby increasing cAMP dependency; promotes ubiquitin-dependent proteolysis of Ira2p; regulated by G-alpha protein Gpa2p; GPB1 has a paralog, GPB2, that arose from the whole genome duplication	10.8455	-0.0116286	0.791414	0.91708	13.793	-0.05	0.54	0.841516	no
YPL217C	BMS1	16	139620	143171	C	GTPase BMS1	GTPase required for ribosomal subunit synthesis and rRNA processing; required for synthesis of 40S ribosomal subunits and for processing the 35S pre-rRNA at sites A0, A1, and A2; interacts with Rcl1p, which stimulates its GTPase and U3 snoRNA binding activities; has similarity to Tsr1p	13.9414	0.0076698	0.807265	0.924539	12.225	-0.05	0.41	0.7494	no
YAL016W	TPD3	1	124879	126786	W	protein phosphatase 2A structural subunit TPD3|FUN32	Regulatory subunit A of the heterotrimeric PP2A complex; the heterotrimeric protein phosphatase 2A (PP2A) complex also contains regulatory subunit Cdc55p and either catalytic subunit Pph21p or Pph22p; required for cell morphogenesis and transcription by RNA polymerase III	13.2051	-0.034771	0.211434	0.511151	11.113	-0.04	0.89	0.962463	no
YBL058W	SHP1	2	111437	112708	W	protein phosphatase regulator SHP1|UBX1	UBX domain-containing substrate adaptor for Cdc48p; ubiquitin regulatory X domain-containing protein that acts as a substrate recruiting cofactor for Cdc48p; positively regulates Glc7p PPase activity to promote growth and mitotic progression in complex with Cdc48p; ubiquitinated protein interactor involved in ER-associated degradation (ERAD); regulated by nuclear Ub-dependent degradation (INMAD p…	13.0089	-0.0478441	0.0978288	0.340021	12.81	-0.04	0.052	0.296	no
YBR152W	SPP381	2	546376	547251	W	U4/U6-U5 snRNP complex subunit SPP381	mRNA splicing factor, component of U4/U6.U5 tri-snRNP; interacts genetically and physically with Prp38p; relocalizes to the cytosol in response to hypoxia	9.20634	0.0328994	0.492849	0.756727	13.547	-0.04	0.95	0.979109	no
YBR279W	PAF1	2	761257	762594	W		Component of the Paf1p complex involved in transcription elongation; binds to and modulates the activity of RNA polymerases I and II; required for expression of a subset of genes, including cell cycle-regulated genes; involved in SER3 repression by helping to maintain SRG1 transcription-dependent nucleosome occupancy; homolog of human PD2/hPAF1	12.3925	0.0398418	0.239059	0.541435	15.162	-0.04	0.61	0.872873	no
YCL010C	SGF29	3	103571	104350	C		Component of the HAT/Core module of the SAGA, SLIK, and ADA complexes; HAT/Core module also contains Gcn5p, Ngg1p, and Ada2p; binds methylated histone H3K4; involved in transcriptional regulation through SAGA and TBP recruitment to target promoters and H3 acetylation	10.6126	-0.0824066	0.0352947	0.188249	12.283	-0.04	0.93	0.975972	no
YCL031C	RRP7	3	64675	65568	C		Essential protein involved in rRNA processing and ribosome biogenesis; protein abundance increases in response to DNA replication stress	12.7376	0.0162537	0.606256	0.826582	15.138	-0.04	0.37	0.725985	no
YCL050C	APA1	3	37836	38801	C	bifunctional AP-4-A phosphorylase/ADP sulfurylase|DTP1	AP4A phosphorylase; bifunctional diadenosine 5',5'''-P1,P4-tetraphosphate phosphorylase and ADP sulfurylase involved in catabolism of bis(5'-nucleosidyl) tetraphosphates; catalyzes phosphorolysis of dinucleoside oligophosphates, cleaving substrates' alpha/beta-anhydride bond and introducing Pi into the beta-position of the corresponding NDP formed; protein abundance increases under DNA replicatio…	13.5208	-0.00739977	0.787094	0.915801	15.957	-0.04	0.13	0.470909	no
YCL054W	SPB1	3	31449	33974	W	27S pre-rRNA (guanosine2922-2'-O)-methyltransferase	AdoMet-dependent methyltransferase; involved in rRNA processing and 60S ribosomal subunit maturation; methylates G2922 in the tRNA docking site of the large subunit rRNA and in the absence of snR52, U2921; suppressor of PAB1 mutants	13.9221	0.0115081	0.762914	0.905273	12.449	-0.04	0.7	0.900539	no
YDL059C	RAD59	4	344237	344953	C		Protein involved DNA double-strand break repair; repairs breaks in DNA during vegetative growth via recombination and single-strand annealing; anneals complementary single-stranded DNA; forms nuclear foci upon DNA replication stress; required for loading of Rad52p to DSBs; regulates replication fork progression in DNA ligase I-deficient cells; paralog of Rad52p	8.61594	0.0427682	0.430635	0.71731	13.896	-0.04	0.47	0.794582	no
YDL075W	RPL31A	4	322226	322988	W	eL31|ribosomal 60S subunit protein L31A|L31e|YL28|L34A|L31A|RPL34	Ribosomal 60S subunit protein L31A; associates with karyopherin Sxm1p; loss of both Rpl31p and Rpl39p confers lethality; homologous to mammalian ribosomal protein L31, no bacterial homolog; RPL31A has a paralog, RPL31B, that arose from the whole genome duplication	15.181	-0.094953	0.0259603	0.155992	14.578	-0.04	0.92	0.973366	no
YDL099W	BUG1	4	283419	284444	W		Cis-golgi localized protein involved in ER to Golgi transport; forms a complex with the mammalian GRASP65 homolog, Grh1p; mutants are compromised for the fusion of ER-derived vesicles with Golgi membranes	12.2168	0.0672056	0.0694328	0.277105	12.706	-0.04	0.031	0.224902	no
YDL195W	SEC31	4	107208	111029	W	WEB1	Component of the Sec13p-Sec31p complex of the COPII vesicle coat; COPII coat is required for vesicle formation in ER to Golgi transport; mutant has increased aneuploidy tolerance	13.5933	0.0300132	0.495348	0.757732	15.271	-0.04	0.31	0.678698	no
YDR007W	TRP1	4	461842	462516	W	phosphoribosylanthranilate isomerase TRP1	Phosphoribosylanthranilate isomerase; catalyzes the third step in tryptophan biosynthesis; in 2004, the sequence of TRP1 from strain S228C was updated by changing the previously annotated internal STOP (TAA) to serine (TCA); enhances vegetative growth at low and high temperatures when used as an auxotrophic marker in strains such as W303	11.1211	-0.0753386	0.0463608	0.221416	14.915	-0.04	0.97	0.986376	no
YDR057W	YOS9	4	565927	567555	W		ER quality-control lectin; integral subunit of the HRD ligase; participates in efficient ER retention of misfolded proteins by recognizing them and delivering them to Hrd1p; binds to glycans with terminal alpha-1,6 linked mannose on misfolded N-glycosylated proteins and participates in targeting proteins to ERAD; member of the OS-9 protein family	10.8994	0.0645688	0.0471061	0.223676	13.26	-0.04	0.64	0.879112	no
YDR096W	GIS1	4	637139	639823	W	histone demethylase GIS1	Histone demethylase and transcription factor; regulates genes during nutrient limitation; activity modulated by proteasome-mediated proteolysis; has JmjC and JmjN domain in N-terminus that interact, promoting stability and proper transcriptional activity; contains two transactivating domains downstream of Jmj domains and a C-terminal DNA binding domain; relocalizes to the cytosol in response to h…	10.251	0.0714423	0.146293	0.420637	13.828	-0.04	0.7	0.900539	no
YDR163W	CWC15	4	781423	781950	W	U2-type spliceosomal complex subunit CWC15	Non-essential protein involved in pre-mRNA splicing; component of a complex containing Cef1p; has similarity to S. pombe Cwf15p	9.91997	0.0213551	0.657873	0.857933	11.428	-0.04	0.64	0.879112	no
YDR214W	AHA1	4	892875	893927	W		Co-chaperone that binds Hsp82p and activates its ATPase activity; plays a role in determining prion variants; similar to Hch1p; expression is regulated by stresses such as heat shock; protein abundance increases in response to DNA replication stress	12.7051	-0.0648177	0.162836	0.444976	13.578	-0.04	0.13	0.470909	no
YDR368W	YPR1	4	1213904	1214842	W	trifunctional aldehyde reductase/carbonyl reductase (NADPH)/glucose 1-dehydrogenase (NADP(+)) YPR1	NADPH-dependent aldo-keto reductase; reduces multiple substrates including 2-methylbutyraldehyde and D,L-glyceraldehyde, expression is induced by osmotic and oxidative stress; functionally redundant with other aldo-keto reductases; protein abundance increases in response to DNA replication stress; YPR1 has a paralog, GCY1, that arose from the whole genome duplication; human homolog AKR1B1 can com…	12.2307	-0.0787434	0.0223817	0.143278	13.539	-0.04	0.25	0.628031	no
YDR473C	PRP3	4	1404445	1405854	C	U4/U6-U5 snRNP complex subunit PRP3|RNA3	Splicing factor; component of the U4/U6-U5 snRNP complex	10.8186	0.0778894	0.0602516	0.255248	12.884	-0.04	0.19	0.560478	no
YDR517W	GRH1	4	1477239	1478357	W		Acetylated cis-Golgi protein, involved in ER to Golgi transport; homolog of human GRASP65; forms a complex with the coiled-coil protein Bug1p; mutants are compromised for the fusion of ER-derived vesicles with Golgi membranes; protein abundance increases in response to DNA replication stress	11.6621	-0.0389297	0.207089	0.506502	13.347	-0.04	0.2	0.571744	no
YEL037C	RAD23	5	81407	82603	C		Protein with ubiquitin-like N terminus; subunit of Nuclear Excision Repair Factor 2 (NEF2) with Rad4p that binds damaged DNA; enhances protein deglycosylation activity of Png1p; also involved, with Rad4p, in ubiquitylated protein turnover; Rad4p-Rad23p heterodimer binds to promoters of DNA damage response genes to repress their transcription in the absence of DNA damage	13.0149	0.0071012	0.828299	0.934551	12.297	-0.04	0.52	0.831358	no
YER030W	CHZ1	5	213437	213898	W		Histone chaperone for Htz1p/H2A-H2B dimer; required for the stabilization of the Chz1p-Htz1-H2B complex; has overlapping function with Nap1p; null mutant displays weak sensitivity to MMS and benomyl; contains a highly conserved CHZ motif; protein abundance increases in response to DNA replication stress	12.0273	0.0771076	0.0373107	0.195218	12.976	-0.04	0.97	0.986376	no
YER056C-A	RPL34A	5	269423	270185	C	eL34|ribosomal 60S subunit protein L34A|L34e|L34A	Ribosomal 60S subunit protein L34A; homologous to mammalian ribosomal protein L34, no bacterial homolog; RPL34A has a paralog, RPL34B, that arose from the whole genome duplication	14.598	-0.0455257	0.165746	0.4492	14.75	-0.04	0.36	0.720556	no
YER137C	YER137C	5	441373	441819	C		Putative protein of unknown function	8.75976	-0.00236922	0.966971	0.987914	14.295	-0.04	0.46	0.790577	no
YFL041W	FET5	6	49139	51007	W	ferroxidase FET5	Multicopper oxidase; integral membrane protein with similarity to Fet3p; may have a role in iron transport	11.8352	-0.0186591	0.553913	0.795136	13.851	-0.04	0.67	0.888986	no
YGL110C	CUE3	7	301537	303411	C		Protein of unknown function; has a CUE domain that binds ubiquitin, which may facilitate intramolecular monoubiquitination	11.3557	0.048434	0.0974619	0.339524	12.384	-0.04	0.79	0.93643	no
YGL191W	COX13	7	144808	145197	W	cytochrome c oxidase subunit VIa	Subunit VIa of cytochrome c oxidase; present in a subclass of cytochrome c oxidase complexes that may have a role in mimimizing generation of reactive oxygen species; not essential for cytochrome c oxidase activity but may modulate activity in response to ATP; required for assembly of Rcf2p into cytochrome c oxidase - cytochrome bc1 supercomplexes	11.4301	-0.0796743	0.0583866	0.252074	14.036	-0.04	0.63	0.879112	no
YGL234W	ADE5,7	7	56482	58890	W	bifunctional aminoimidazole ribotide synthase/glycinamide ribotide synthase	Enzyme of the 'de novo' purine nucleotide biosynthetic pathway; contains aminoimidazole ribotide synthetase and glycinamide ribotide synthetase activities	14.0989	-0.0219741	0.5527	0.794402	12.642	-0.04	0.38	0.729577	no
YGL245W	GUS1	7	39023	41149	W	glutamate--tRNA ligase GUS1|GluRS|GSN1	Glutamyl-tRNA synthetase (GluRS); forms a complex with methionyl-tRNA synthetase (Mes1p) and Arc1p; complex formation increases the catalytic efficiency of both tRNA synthetases and ensures their correct localization to the cytoplasm; protein abundance increases in response to DNA replication stress	15.1958	-0.0448153	0.0883306	0.319415	13.89	-0.04	0.1	0.415064	no
YGR220C	MRPL9	7	936074	936883	C	mitochondrial 54S ribosomal protein YmL9|YmL9	Mitochondrial ribosomal protein of the large subunit	11.0421	-0.0215671	0.568928	0.803677	11.47	-0.04	0.87	0.957629	no
YGR232W	NAS6	7	953960	954646	W		Evolutionarily conserved 19S regulatory particle assembly-chaperone; proteasome-interacting protein involved in the assembly of the base subcomplex of the 19S proteasomal regulatory particle (RP); ortholog of human oncoprotein gankyrin, also known as p28, which interacts with the Rb tumor suppressor and CDK4/6	11.0942	-0.0657895	0.0710913	0.281965	14.03	-0.04	0.47	0.794582	no
YGR258C	RAD2	7	1007671	1010766	C	ssDNA endodeoxyribonuclease RAD2	Single-stranded DNA endonuclease; cleaves single-stranded DNA during nucleotide excision repair to excise damaged DNA; subunit of Nucleotide Excision Repair Factor 3 (NEF3); homolog of human XPG protein	11.5005	-0.00173157	0.950436	0.982652	12.194	-0.04	0.68	0.894919	no
YGR286C	BIO2	7	1063813	1064940	C	biotin synthase	Biotin synthase; catalyzes the conversion of dethiobiotin to biotin, which is the last step of the biotin biosynthesis pathway; complements E. coli bioB mutant	11.8398	-0.0311854	0.517546	0.768639	14.023	-0.04	0.33	0.695443	no
YHR028C	DAP2	8	164978	167434	C	DPP2	Dipeptidyl aminopeptidase; synthesized as a glycosylated precursor; localizes to the vacuolar membrane; similar to Ste13p	12.9866	0.00979925	0.715599	0.887368	13.156	-0.04	0.45	0.78169	no
YHR060W	VMA22	8	220725	221270	W	VPH6|CEV1	Protein that is required for vacuolar H+-ATPase (V-ATPase) function; peripheral membrane protein; not an actual component of the V-ATPase complex; functions in the assembly of the V-ATPase; localized to the yeast endoplasmic reticulum (ER)	10.6685	0.0723823	0.0585149	0.25225	14.719	-0.04	0.69	0.897139	no
YIL096C	BMT5	9	182117	183127	C	25S rRNA (uracil2634-N3)-methyltransferase	Methyltransferase required for m3U2634 methylation of the 25S rRNA; S-adenosylmethionine-dependent; associates with precursors of the 60S ribosomal subunit; predicted to be involved in ribosome biogenesis	11.3038	-0.0480355	0.158697	0.438877	13.135	-0.04	0.45	0.78169	no
YIL112W	HOS4	9	151595	154846	W		Subunit of the Set3 complex; complex is a meiotic-specific repressor of sporulation specific genes that contains deacetylase activity; potential Cdc28p substrate	12.1341	0.0628743	0.0550087	0.242586	10.907	-0.04	0.5	0.813442	no
YJL115W	ASF1	10	196287	197126	W	nucleosome assembly factor ASF1|CIA1	Nucleosome assembly factor; involved in chromatin assembly, disassembly; required for recovery after DSB repair; role in H3K56 acetylation required for expression homeostasis, buffering mRNA synthesis rate against gene dosage changes in S phase; anti-silencing protein, derepresses silent loci when overexpressed; role in regulating Ty1 transposition; relocalizes to cytosol under hypoxia; growth de…	11.6004	-0.0055305	0.891228	0.959201	15.113	-0.04	0.3	0.669251	no
YJL136C	RPS21B	10	156550	157273	C	eS21|ribosomal 40S subunit protein S21B|S21e|YS25|S26B|S21B	Protein component of the small (40S) ribosomal subunit; homologous to mammalian ribosomal protein S21, no bacterial homolog; RPS21B has a paralog, RPS21A, that arose from the whole genome duplication	14.2686	-0.102232	0.0183456	0.125689	12.192	-0.04	0.89	0.962463	no
YJL145W	SFH5	10	145160	146044	W		Non-classical phosphatidylinositol transfer protein (PITP); exhibits PI- but not PC-transfer activity; localizes to the peripheral endoplasmic reticulum, cytosol and microsomes; similar to Sec14p; partially relocalizes to the plasma membrane upon DNA replication stress	12.224	-0.013091	0.658995	0.858962	15.14	-0.04	0.27	0.64333	no
YJR002W	MPP10	10	438865	440646	W	rRNA-processing protein MPP10	Component of the SSU processome and 90S preribosome; required for pre-18S rRNA processing, interacts with and controls the stability of Imp3p and Imp4p, essential for viability; similar to human Mpp10p	13.3117	-0.0635894	0.0294582	0.167896	14.316	-0.04	0.56	0.855189	no
YJR050W	ISY1	10	528697	529404	W	NTC30|UTR3	Member of the NineTeen Complex (NTC); NTC contains Prp19p and stabilizes U6 snRNA in catalytic forms of spliceosome containing U2, U5, and U6 snRNAs; interacts with Prp16p to modulate splicing fidelity; isy1 syf2 cells have defective spindles	9.77782	-0.00698648	0.887849	0.958058	13.805	-0.04	0.58	0.85791	no
YJR082C	EAF6	10	581914	582255	C		Subunit of the NuA4 acetyltransferase complex; this complex acetylates histone H4 and NuA3 acetyltransferase complex that acetylates histone H3	9.35772	-0.0518609	0.286348	0.589605	12.325	-0.04	0.75	0.919309	no
YJR125C	ENT3	10	654737	655963	C		Protein containing an N-terminal epsin-like domain; involved in clathrin recruitment and traffic between the Golgi and endosomes; associates with the clathrin adaptor Gga2p	11.8724	-0.0839998	0.00741635	0.0671086	13.672	-0.04	0.51	0.821966	no
YKL009W	MRT4	11	426242	426952	W		Protein involved in mRNA turnover and ribosome assembly; required at post-transcriptional step for efficient retrotransposition; localizes to the nucleolus	13.3766	-0.0516795	0.196876	0.495201	15.27	-0.04	0.32	0.685525	no
YKL052C	ASK1	11	339668	340546	C		Essential subunit of the Dam1 complex (aka DASH complex); couples kinetochores to the force produced by MT depolymerization thereby aiding in chromosome segregation; phosphorylated during the cell cycle by cyclin-dependent kinases; sumoylated in an Mms21p-dependent manner; protein abundance increases in response to DNA replication stress	10.721	0.019914	0.662053	0.861238	10.981	-0.04	0.91	0.970717	no
YKL060C	FBA1	11	326408	327487	C	fructose-bisphosphate aldolase FBA1|LOT1	Fructose 1,6-bisphosphate aldolase; required for glycolysis and gluconeogenesis; catalyzes conversion of fructose 1,6 bisphosphate to glyceraldehyde-3-P and dihydroxyacetone-P; locates to mitochondrial outer surface upon oxidative stress; N-terminally propionylated in vivo	18.9899	-0.0974925	0.0175448	0.122092	12.971	-0.04	0.28	0.649821	no
YKL138C	MRPL31	11	185286	185681	C	mitochondrial 54S ribosomal protein YmL31|YmL31	Mitochondrial ribosomal protein of the large subunit	10.1966	0.00782385	0.847063	0.940908	13.782	-0.04	0.95	0.979109	no
YKL213C	DOA1	11	31960	34107	C	ZZZ4|UFD3	WD repeat protein required for ubiquitin-mediated protein degradation; ubiquitin binding cofactor that complexes with Cdc48p; required for ribophagy; controls cellular ubiquitin concentration; promotes efficient NHEJ in postdiauxic/stationary phase; facilitates N-terminus-dependent proteolysis of centromeric histone H3 (Cse4p) for faithful chromosome segregation; protein increases in abundance an…	12.55	-0.0388879	0.199501	0.498752	11.023	-0.04	1	1	no
YKR007W	MEH1	11	451434	451988	W	GSE2|EGO1	Component of the EGO and GSE complexes; EGO is involved in the regulation of microautophagy and GSE is required for proper sorting of amino acid permease Gap1p; loss results in a defect in vacuolar acidification	10.5944	0.0232508	0.547736	0.791419	10.506	-0.04	0.41	0.7494	no
YKR025W	RPC37	11	487770	488618	W	DNA-directed RNA polymerase III subunit C37|C37	RNA polymerase III subunit C37	11.8761	-0.111933	0.00553067	0.0539474	13.432	-0.04	0.5	0.813442	no
YKR043C	SHB17	11	520897	521712	C	sedoheptulose-bisphosphatase	Sedoheptulose bisphosphatase involved in riboneogenesis; dephosphorylates sedoheptulose 1,7-bisphosphate, which is converted via the nonoxidative pentose phosphate pathway to ribose-5-phosphate; facilitates the conversion of glycolytic intermediates to pentose phosphate units; also has fructose 1,6-bisphosphatase activity but this is probably not biologically relevant, since deletion does not aff…	13.2289	-0.0667968	0.0306386	0.171737	13.088	-0.04	0.17	0.530482	no
YLL022C	HIF1	12	99044	100201	C		Non-essential component of the HAT-B histone acetyltransferase complex; localized to the nucleus; has a role in telomeric silencing; other members are Hat1p and Hat2p	11.246	-0.0371522	0.277753	0.580207	13.844	-0.04	0.4	0.743185	no
YLR154C	RNH203	12	447982	448314	C	Rnh2C	Ribonuclease H2 subunit; required for RNase H2 activity; role in ribonucleotide excision repair; related to human AGS3 that causes Aicardi-Goutieres syndrome	9.62454	-0.0134856	0.773237	0.910575	14.362	-0.04	0.79	0.93643	no
YLR192C	HCR1	12	538792	539589	C	translation initiation factor eIF3 core subunit j	eIF3j component of translation initiation factor 3 (eIF3); dual function protein involved in translation initiation as a substoichiometric component (eIF3j) of eIF3; required for 20S pre-rRNA processing; required at post-transcriptional step for efficient retrotransposition; absence decreases Ty1 Gag:GFP protein levels; binds eIF3 subunits Rpg1p, Prt1p and 18S rRNA; eIF3 also involved in programm…	12.8281	-0.0332202	0.382997	0.679086	14.474	-0.04	0.47	0.794582	no
YLR370C	ARC18	12	861718	862254	C		Subunit of the ARP2/3 complex; ARP2/3 is required for the motility and integrity of cortical actin patches	11.6405	-0.0091809	0.756981	0.902326	15.305	-0.04	0.59	0.86431	no
YLR386W	VAC14	12	893628	896270	W		Enzyme regulator; involved in synthesis of phosphatidylinositol 3,5-bisphosphate, in control of trafficking of some proteins to the vacuole lumen via the MVB, and in maintenance of vacuole size and acidity; binds negative (Fig4p) and positive (Fab1p) regulators of PtdIns(3,5)P(2) to control endolysosome function; similar to mammalian Vac14p	11.4835	-0.00943208	0.74603	0.899141	12.584	-0.04	0.75	0.919309	no
YLR390W	ECM19	12	903066	903404	W		Protein of unknown function; the authentic, non-tagged protein is detected in highly purified mitochondria in high-throughput studies	9.00589	0.0868137	0.0893675	0.321043	11.995	-0.04	0.5	0.813442	no
YLR390W-A	CCW14	12	903724	904440	W	ICWP|YLR391W|SSR1|YLR391W-A	Covalently linked cell wall glycoprotein; present in the inner layer of the cell wall	13.7634	-0.0149105	0.716699	0.887937	9.992	-0.04	0.72	0.906122	no
YML015C	TAF11	13	241989	243029	C	TafII40|TAF40	TFIID subunit (40 kDa); involved in RNA polymerase II transcription initiation, similar to histone H3 with atypical histone fold motif of Spt3-like transcription factors	11.2303	0.00928222	0.781525	0.913654	13.185	-0.04	0.36	0.720556	no
YML026C	RPS18B	13	222987	223828	C	uS13|ribosomal 40S subunit protein S18B|S18B|S13	Protein component of the small (40S) ribosomal subunit; homologous to mammalian ribosomal protein S18 and bacterial S13; RPS18B has a paralog, RPS18A, that arose from the whole genome duplication; protein abundance increases in response to DNA replication stress	15.4733	-0.0623466	0.173839	0.462741	13.662	-0.04	0.64	0.879112	no
YML058W	SML1	13	159383	159697	W	ribonucleotide reductase inhibiting protein SML1	Ribonucleotide reductase inhibitor; involved in regulating dNTP production; regulated by Mec1p and Rad53p during DNA damage and S phase; SML1 has a paralog, DIF1, that arose from the whole genome duplication	12.4612	-0.10362	0.0146987	0.109009	14.388	-0.04	0.83	0.948676	no
YML080W	DUS1	13	108806	110077	W	tRNA dihydrouridine synthase	Dihydrouridine synthase; member of a widespread family of conserved proteins including Smm1p, Dus3p, and Dus4p; modifies pre-tRNA(Phe) at U17	11.4603	-0.0468354	0.26985	0.574144	14.856	-0.04	0.3	0.669251	no
YML105C	SEC65	13	57866	58687	C	RNA-binding signal recognition particle subunit SEC65	Subunit of the signal recognition particle (SRP); involved in protein targeting to the ER; interacts with Srp54p; homolog of mammalian SRP19	12.0857	-0.0392397	0.16356	0.445474	13.609	-0.04	0.56	0.855189	no
YML113W	DAT1	13	44045	44791	W		DNA binding protein that recognizes oligo(dA).oligo(dT) tracts; Arg side chain in its N-terminal pentad Gly-Arg-Lys-Pro-Gly repeat is required for DNA-binding; relocalizes to the cytosol in response to hypoxia; not essential for viability	11.0762	-0.0509425	0.297066	0.602919	12.282	-0.04	0.59	0.86431	no
YMR072W	ABF2	13	411569	412120	W	DNA-binding protein ABF2|mtTFA|HM|p19	Mitochondrial DNA-binding protein; involved in mitochondrial DNA replication and recombination, member of HMG1 DNA-binding protein family; activity may be regulated by protein kinase A phosphorylation; ABF2 has a paralog, IXR1, that arose from the whole genome duplication; human homolog TFAM can complement yeast abf2 mutant, rescuing the loss-of-mitochondrial DNA phenotype in a yeast abf2 strain	12.7662	-0.0136511	0.644105	0.850557	14.549	-0.04	0.71	0.900539	no
YMR129W	POM152	13	527804	531817	W		Glycoprotein subunit of transmembrane ring of nuclear pore complex; contributes to nucleocytoplasmic transport, nuclear pore complex (NPC) biogenesis and spindle pole body duplication; homologous to human NUP210	12.6761	-0.00405458	0.910093	0.969172	11.58	-0.04	0.62	0.874619	no
YMR131C	RRB1	13	533163	534698	C	ribosome biosynthesis protein RRB1	Specific chaperone for ribosomal protein Rpl3p; binds to nascent Rpl3p during translation; essential gene	14.3866	-0.0674617	0.0268238	0.158331	12.875	-0.04	0.16	0.51995	no
YMR193W	MRPL24	13	650036	650812	W	mitochondrial 54S ribosomal protein YmL24/YmL14|YmL14|YmL24|MRPL14	Mitochondrial ribosomal protein of the large subunit; two mitochondrial ribosomal proteins, YmL14 and YmL24, have been assigned to the same gene	10.1903	-0.0192463	0.627395	0.841199	12.347	-0.04	0.62	0.874619	no
YMR227C	TAF7	13	722613	724385	C	TafII67|TAF67	TFIID subunit (67 kDa); involved in RNA polymerase II transcription initiation	11.3372	0.0108925	0.765104	0.906002	12.439	-0.04	0.39	0.735688	no
YNL113W	RPC19	14	412771	413199	W	DNA-directed RNA polymerase core subunit RPC19|AC19	RNA polymerase subunit AC19; common to RNA polymerases I and III	11.9862	-0.0722525	0.124603	0.387615	13.264	-0.04	0.73	0.910303	no
YNL173C	MDG1	14	308957	310057	C		Plasma membrane protein; involved in G-protein mediated pheromone signaling pathway; overproduction suppresses bem1 mutations; MDG1 has a paralog, CRP1, that arose from the whole genome duplication	11.3784	-0.022563	0.50204	0.761328	12.962	-0.04	0.57	0.85682	no
YNL183C	NPR1	14	293137	295509	C	serine/threonine protein kinase NPR1	Protein kinase; stabilizes several plasma membrane amino acid transporters by antagonizing their ubiquitin-mediated degradation; phosphorylates Aly2p; negatively regulates Ldb19p-mediated endocytosis through phosphorylation of Ldb19p, which prevents its association with the plasma membrane; Npr1p activity is negatively regulated via phosphorylation by the TOR complex; NPR1 has a paralog, PRR2, th…	11.2259	0.0568964	0.159219	0.439086	12.346	-0.04	0.63	0.879112	no
YNL246W	VPS75	14	185460	186349	W		NAP family histone chaperone; binds to histones and Rtt109p, stimulating histone acetyltransferase activity; possesses nucleosome assembly activity in vitro; proposed role in vacuolar protein sorting and in double-strand break repair; protein abundance increases in response to DNA replication stress; relocalizes to the cytosol in response to hypoxia	11.2853	-0.0645446	0.0834763	0.30815	14.069	-0.04	0.72	0.906122	no
[truncated: 1,548 more rows]
