# Supplementary material for: Simultaneous quantification of mRNA and protein in single cells reveals post-transcriptional effects of genetic variation
Source: eLife journal article supplement (doi:10.7554/elife.60645), 2020-11-16
Supplement: supp [file elife-60645-supp-v1.zip › elife_poa_e60645_Figure_7_source_data_4.xlsx]

## Sheet: Sheet1
SourceData_07_4: GO term enrichment analysis of the differentially expressed genes (BY YAK1-Q578* compared to BY YAK1-WT)
type	experiment	threshold	number_of_significant_genes	number_of_genes_tested	GOterm_number	GOterm_description	q-value	number significant	category size
lower RNA	RNAseq	adjpv(RNA) < 0.05	310	5755	GO:0002181	cytoplasmic translation	5.06e-24	46	123
lower RNA	RNAseq	adjpv(RNA) < 0.05	310	5755	GO:0071555	cell wall organization	0.00461	26	202
lower RNA	RNAseq	adjpv(RNA) < 0.05	310	5755	GO:0046034	ATP metabolic process	0.0278	10	51
lower RNA	RNAseq	adjpv(RNA) < 0.05	310	5755	GO:0006094	gluconeogenesis	0.0566	5	15
higher RNA	RNAseq	adjpv(RNA) < 0.05	262	5755	GO:0008652	cellular amino acid biosynthetic process	0.00132	21	130
higher RNA	RNAseq	adjpv(RNA) < 0.05	262	5755	GO:0000755	cytogamy	0.000687	7	11
lower protein	MassSpec	adjpv(prot) < 0.05	82	2590	GO:0001676	long-chain fatty acid metabolic process	0.0197	4	5
higher protein	MassSpec	adjpv(prot) < 0.05	82	2590	GO:0008652	cellular amino acid biosynthetic process	0.0603	12	101
lower RNA only	RNAvProt	adjpv(RNA) < 0.05 & pv(prot) > 0.05	118	2577	GO:0002181	cytoplasmic translation	5.16e-17	28	72
lower RNA only	RNAvProt	adjpv(RNA) < 0.05 & pv(prot) > 0.05	118	2577	GO:0019318	hexose metabolic process	0.0192	7	28
higher RNA only	RNAvProt	adjpv(RNA) < 0.05 & pv(prot) > 0.05	58	2577	GO:0008652	cellular amino acid biosynthetic process	0.0015	12	101
lower protein only	RNAvProt	adjpv(prot) < 0.05 & pv(RNA) > 0.05	50	2577	GO:0042759	long-chain fatty acid biosynthetic process	0.0277	3	3
higher protein only	RNAvProt	adjpv(prot) < 0.05 & pv(RNA) > 0.05	60	2577		no enrichment
lower RNA & protein	RNAvProt	adjpv(RNA) < 0.05 & adjpv(prot) < 0.05	27	2577		no enrichment
higher RNA & protein	RNAvProt	adjpv(RNA) < 0.05 & adjpv(prot) < 0.05	15	2577	GO:0055114	oxidation-reduction process	0.0724	8	237
