# Supplementary material for: Simultaneous quantification of mRNA and protein in single cells reveals post-transcriptional effects of genetic variation
Source: eLife journal article supplement (doi:10.7554/elife.60645), 2020-11-16
Supplement: supp [file elife-60645-supp-v1.zip › elife_poa_e60645_Supplementary_file_1.xlsx]

## Sheet: Sheet1
Table S1: Gene expression levels based on previous work: mRNA from RNAseq Albert, Bloom et al. 2018 and protein from GFP fluorescence from Huh et al. 2003 (used in Figure S6)
sysname	name	chromosome	position_up	position_down	strand	alias	RNAseq_log2_mean_Albert_Bloom_2018	GFP_YEPD_Huh_2003	Reason_AbsentYEPD_Huh_2003	GFP_SD_Huh_2003	Reason_AbsentSD_Huh_2003	annotation
Q0010	Q0010	17	3952	4338	W	ORF6						Dubious open reading frame; unlikely to encode a protein, based on available experimental and comparative sequence data; partially overlaps the dubious ORF Q0017
Q0017	Q0017	17	4254	4415	W	ORF7						Dubious open reading frame; unlikely to encode a protein, based on available experimental and comparative sequence data; partially overlaps the dubious ORF Q0010
Q0032	Q0032	17	11667	11957	W	ORF8						Dubious open reading frame; unlikely to encode a functional protein, based on available experimental and comparative sequence data
Q0045	COX1	17	13818	26701	W	cytochrome c oxidase subunit 1|OXI3						Subunit I of cytochrome c oxidase (Complex IV); Complex IV is the terminal member of the mitochondrial inner membrane electron transport chain; one of three mitochondrially-encoded subunits
Q0050	AI1	17	13818	16322	W	intron-encoded reverse transcriptase aI1						Reverse transcriptase required for splicing of the COX1 pre-mRNA; encoded by a mobile group II intron within the mitochondrial COX1 gene
Q0055	AI2	17	13818	18830	W	intron-encoded reverse transcriptase aI2						Reverse transcriptase required for splicing of the COX1 pre-mRNA; encoded by a mobile group II intron within the mitochondrial COX1 gene
Q0060	AI3	17	13818	19996	W	intron-encoded DNA endonuclease aI3|I-SceIII						Endonuclease I-SceIII; encoded by a mobile group I intron within the mitochondrial COX1 gene
Q0065	AI4	17	13818	21935	W	intron-encoded DNA endonuclease aI4|I-SceII						Endonuclease I-SceII; encoded by a mobile group I intron within the mitochondrial COX1 gene; intron is normally spliced by the BI4p maturase but AI4p can mutate to acquire the same maturase activity
Q0070	AI5_ALPHA	17	13818	23167	W	intron-encoded DNA endonuclease aI5 alpha						Endonuclease I-SceIV; involved in intron mobility; encoded by a mobile group I intron within the mitochondrial COX1 gene
Q0075	AI5_BETA	17	24156	25255	W	intron-encoded DNA endonuclease aI5 beta						Protein of unknown function; encoded within an intron of the mitochondrial COX1 gene; translational initiation codon is predicted to be ATA rather than ATG
Q0080	ATP8	17	27666	27812	W	F1F0 ATP synthase subunit 8|AAP1						Subunit 8 of the F0 sector of mitochondrial F1F0 ATP synthase; encoded on the mitochondrial genome; ATP8 and ATP6 mRNAs are not translated in the absence of the F1 sector of ATPase
Q0085	ATP6	17	28487	29266	W	F1F0 ATP synthase subunit a|PHO1|OLI4|OLI2						Subunit a of the F0 sector of mitochondrial F1F0 ATP synthase; mitochondrially encoded; translation is specifically activated by Atp22p; ATP6 and ATP8 mRNAs are not translated in the absence of the F1 sector of ATPase; mutations in human ortholog MT-ATP6 are associated with neurodegenerative disorders such as Neurogenic Ataxia and Retinitis Pigmentosa (NARP), Leigh syndrome (LS), Charcot-Marie-To…
Q0092	Q0092	17	30874	31014	W	ORF5						Dubious open reading frame; unlikely to encode a functional protein, based on available experimental and comparative sequence data
Q0105	COB	17	36540	43647	W	cytochrome b|CYTB|COB1						Cytochrome b; mitochondrially encoded subunit of the ubiquinol-cytochrome c reductase complex which includes Cobp, Rip1p, Cyt1p, Cor1p, Qcr2p, Qcr6p, Qcr7p, Qcr8p, Qcr9p, and Qcr10p
Q0110	BI2	17	36540	38579	W	cytochrome b mRNA maturase bI2						Mitochondrial mRNA maturase with a role in splicing; encoded by both exon and intron sequences of partially processed COB mRNA
Q0115	BI3	17	36540	40265	W	cytochrome b mRNA maturase bI3						Mitochondrial mRNA maturase; forms a complex with Mrs1p to mediate splicing of the bI3 intron of the COB gene; encoded by both exon and intron sequences of partially processed COB mRNA
Q0120	BI4	17	36540	42251	W	intron-encoded RNA maturase bI4						Mitochondrial mRNA maturase; forms a complex with Nam2p to mediate splicing of the bI4 intron of the COB gene; encoded by both exon and intron sequences of partially processed COB mRNA
Q0130	OLI1	17	46723	46953	W	F0 ATP synthase subunit c|OLI3|ATP9	1.75969					F0-ATP synthase subunit c (ATPase-associated proteolipid); encoded on the mitochondrial genome; mutation confers oligomycin resistance; expression is specifically dependent on the nuclear genes AEP1 and AEP2
Q0140	VAR1	17	48901	50097	W	mitochondrial 37S ribosomal protein VAR1|VARI	2.199					Mitochondrial ribosomal protein of the small subunit; mitochondrially-encoded; polymorphic in different strains due to variation in number of AAT (asparagine) codons; translated near the mitochondrial inner membrane; may have a role in loss of mitochondrial DNA under stress conditions
Q0142	Q0142	17	51052	51228	W	ORF9						Dubious open reading frame; unlikely to encode a functional protein, based on available experimental and comparative sequence data; partially overlaps dubious open reading frame Q0143
Q0143	Q0143	17	51277	51429	W	ORF10						Dubious open reading frame; unlikely to encode a functional protein, based on available experimental and comparative sequence data
Q0144	Q0144	17	54109	54438	W							Dubious open reading frame; unlikely to encode a functional protein, based on available experimental and comparative sequence data
Q0160	SCEI	17	61022	61729	W	intron-encoded endonuclease I-SceI|I-SceIV|OMEGA						I-SceI DNA endonuclease; encoded by the mitochondrial group I intron of the 21S_rRNA gene; mediates gene conversion that propagates the intron into intron-less copies of the 21S_rRNA gene
Q0182	Q0182	17	65770	66174	W	ORF11						Dubious open reading frame; unlikely to encode a functional protein, based on available experimental and comparative sequence data
Q0250	COX2	17	73758	74513	W	cytochrome c oxidase subunit 2|OXII|OXI1						Subunit II of cytochrome c oxidase (Complex IV); Complex IV is the terminal member of the mitochondrial inner membrane electron transport chain; one of three mitochondrially-encoded subunits
Q0255	Q0255	17	74495	75984	W	maturase-like protein|RF1|ORF1						Maturase-like protein
Q0275	COX3	17	79213	80022	W	cytochrome c oxidase subunit 3|OXI2						Subunit III of cytochrome c oxidase (Complex IV); Complex IV is the terminal member of the mitochondrial inner membrane electron transport chain; one of three mitochondrially-encoded subunits
Q0297	Q0297	17	85554	85709	W	ORF12						Dubious open reading frame; unlikely to encode a functional protein, based on available experimental and comparative sequence data; partially overlaps the verified gene RPM1
YAL001C	TFC3	1	147594	151166	C	transcription factor TFIIIC subunit TFC3|tau 138|TSV115|FUN24	4.9064		Abundance_Low		Failed_QC/Abundance_Low	Subunit of RNA polymerase III transcription initiation factor complex; part of the TauB domain of TFIIIC that binds DNA at the BoxB promoter sites of tRNA and similar genes; cooperates with Tfc6p in DNA binding; largest of six subunits of the RNA polymerase III transcription initiation factor complex (TFIIIC)
YAL002W	VPS8	1	143707	147531	W	CORVET complex membrane-binding subunit VPS8|VPL8|VPT8|FUN15	4.51522		Abundance_Low		Abundance_Low	Membrane-binding component of the CORVET complex; involved in endosomal vesicle tethering and fusion in the endosome to vacuole protein targeting pathway; interacts with Vps21p; contains RING finger motif
YAL003W	EFB1	1	142174	143160	W	translation elongation factor 1 subunit beta|EF-1beta|eEF1Balpha|TEF5	10.7404					Translation elongation factor 1 beta; stimulates nucleotide exchange to regenerate EF-1 alpha-GTP for the next elongation cycle; part of the EF-1 complex, which facilitates binding of aminoacyl-tRNA to the ribosomal A site; human homolog EEF1B2 can complement yeast efb1 mutants
YAL004W	YAL004W	1	140760	141407	W							Dubious open reading frame; unlikely to encode a functional protein, based on available experimental and comparative sequence data; completely overlaps verified gene SSA1/YAL005C
YAL005C	SSA1	1	139503	141431	C	Hsp70 family ATPase SSA1|YG100	8.29204	32395		27461.5		ATPase involved in protein folding and NLS-directed nuclear transport; member of HSP70 family; required for ubiquitin-dependent degradation of short-lived proteins; forms chaperone complex with Ydj1p; localized to nucleus, cytoplasm, cell wall; 98% identical to paralog Ssa2p with different functional specificity in propagation of yeast [URE3] prions, vacuolar-mediated degradations of gluconeogene…
YAL007C	ERP2	1	137698	138345	C		8.02727	671.5		410.5		Member of the p24 family involved in ER to Golgi transport; similar to Emp24p and Erv25p; role in misfolded protein quality control; forms a heterotrimeric complex with Erp1p, Emp24p, and Erv25p; localized to COPII-coated vesicles; ERP2 has a paralog, ERP4, that arose from the whole genome duplication
YAL008W	FUN14	1	136914	137510	W	MCP3	6.5339		Abundance_Low		Abundance_Low	Integral mitochondrial outer membrane (MOM) protein; dosage suppressor of an MDM10 null that reduces ERMES-related phenotypes, such as alterations in mitochondrial morphology, protein complex assembly, and lipid profile; dosage suppressor of MDM12, MDM34, and MMM1 null mutant growth defects; novel mechanism of MOM import involving Tom70p, the TOM complex, and the TIM23 complex, requiring mitochon…
YAL009W	SPO7	1	135854	136633	W	Nem1-Spo7 phosphatase regulatory subunit SPO7	5.171		Abundance_Low		Abundance_Low	Putative regulatory subunit of Nem1p-Spo7p phosphatase holoenzyme; regulates nuclear growth by controlling phospholipid biosynthesis, required for normal nuclear envelope morphology, premeiotic replication, and sporulation
YAL010C	MDM10	1	134184	135665	C	FUN37	4.37334		Abundance_Low		Abundance_Low	Subunit of both the ERMES and the SAM complex; component of ERMES complex which acts as a molecular tether between the mitochondria and the ER, necessary for efficient phospholipid exchange between organelles and for mitophagy; SAM/TOB complex component that functions in the assembly of outer membrane beta-barrel proteins; involved in mitochondrial inheritance and morphology; ERMES complex is oft…
YAL011W	SWC3	1	132199	134076	W	SWC1	4.97603		Abundance_Low		Abundance_Low	Protein of unknown function; component of the SWR1 complex, which exchanges histone variant H2AZ (Htz1p) for chromatin-bound histone H2A; required for formation of nuclear-associated array of smooth endoplasmic reticulum known as karmellae
YAL012W	CYS3	1	130799	131983	W	cystathionine gamma-lyase CYS3|STR1|FUN35|CYI1	8.80821	1838		1232.5		Cystathionine gamma-lyase; catalyzes one of the two reactions involved in the transsulfuration pathway that yields cysteine from homocysteine with the intermediary formation of cystathionine; protein abundance increases in response to DNA replication stress
YAL013W	DEP1	1	129270	130487	W	Rpd3L histone deacetylase complex subunit DEP1|FUN54	5.7252					Component of the Rpd3L histone deacetylase complex; required for diauxic shift-induced histone H2B deposition onto rDNA genes; transcriptional modulator involved in regulation of structural phospholipid biosynthesis genes and metabolically unrelated genes, as well as maintenance of telomeres, mating efficiency, and sporulation
YAL014C	SYN8	1	128252	129019	C	syntaxin|SLT2|UIP2	5.95927		Abundance_Low		Abundance_Low	Endosomal SNARE related to mammalian syntaxin 8
YAL015C	NTG1	1	126903	128102	C	bifunctional N-glycosylase/AP lyase NTG1|ogg2|SCR1|FUN33	5.03817		Abundance_Low		Abundance_Low	DNA N-glycosylase and apurinic/apyrimidinic (AP) lyase; involved in base excision repair; acts in both nucleus and mitochondrion; creates a double-strand break at mtDNA origins that stimulates replication in response to oxidative stress; required for maintaining mitochondrial genome integrity; NTG1 has a paralog, NTG2, that arose from the whole genome duplication
YAL016C-A	YAL016C-A	1	124755	125069	C							Dubious open reading frame; unlikely to encode a functional protein, based on available experimental and comparative sequence data; partially overlaps ORF TPD3/YAL016W
YAL016C-B	YAL016C-B	1	124307	124492	C							Dubious open reading frame; unlikely to encode a functional protein, based on available experimental and comparative sequence data
YAL016W	TPD3	1	124879	126786	W	protein phosphatase 2A structural subunit TPD3|FUN32	6.86768	772.5		740.5		Regulatory subunit A of the heterotrimeric PP2A complex; the heterotrimeric protein phosphatase 2A (PP2A) complex also contains regulatory subunit Cdc55p and either catalytic subunit Pph21p or Pph22p; required for cell morphogenesis and transcription by RNA polymerase III
YAL017W	PSK1	1	120225	124295	W	serine/threonine protein kinase PSK1|FUN31	4.56004		Abundance_Low	52.5		PAS domain-containing serine/threonine protein kinase; coordinately regulates protein synthesis and carbohydrate metabolism and storage in response to a unknown metabolite that reflects nutritional status; PSK1 has a paralog, PSK2, that arose from the whole genome duplication
YAL018C	LDS1	1	118564	119541	C							Protein Involved in spore wall assembly; localizes to lipid droplets found on or outside of the prospore membrane; shares similarity with Lds2p and Rrt8p, and a strain mutant for all 3 genes exhibits reduced dityrosine fluorescence relative to the single mutants
YAL019W	FUN30	1	114919	118314	W	DNA-dependent ATPase FUN30	5.31595	86.5		62		Snf2p family member with ATP-dependent chromatin remodeling activity; has a role in silencing at the mating type locus, telomeres and centromeres; enriched at centromeres and is required for correct chromatin structure around centromeres, as well as at the boundary element of the silent HMR; recruited to DNA double-strand breaks (DSBs) where it promotes 5' strand resection of DSBs; potential Cdc2…
YAL019W-A	YAL019W-A	1	114250	114819	W							Dubious open reading frame; unlikely to encode a functional protein, based on available experimental and comparative sequence data; partially overlaps ORF ATS1/YAL020C
YAL020C	ATS1	1	113614	114615	C	KTI13|FUN28	5.40073					Protein required for modification of wobble nucleosides in tRNA; acts with Elongator complex, Kti11p, and Kti12p; has a potential role in regulatory interactions between microtubules and the cell cycle; forms a stable heterodimer with Kti11p
YAL021C	CCR4	1	110846	113359	C	CCR4-NOT core exoribonuclease subunit CCR4|NUT21|FUN27	4.95021	312			Failed_QC	Component of the CCR4-NOT transcriptional complex; CCR4-NOT is involved in regulation of gene expression; component of the major cytoplasmic deadenylase, which is involved in mRNA poly(A) tail shortening
YAL022C	FUN26	1	108877	110430	C	nucleoside transmembrane transporter FUN26	5.62508					High affinity, broad selectivity, nucleoside/nucleobase transporter; vacuolar membrane localized transporter which may regulate the balance of nicotinamide riboside (NmR) levels between the cytosol and vacuole, contributing to salvage of NmR for use in cytosolic NAD+ synthesis; equilibrative nucleoside transporter (ENT) family member
YAL023C	PMT2	1	106272	108551	C	dolichyl-phosphate-mannose-protein mannosyltransferase PMT2|FUN25	7.57406	68.5		58.9		Protein O-mannosyltransferase of the ER membrane; transfers mannose residues from dolichyl phosphate-D-mannose to protein serine/threonine residues; involved in ER quality control; acts in a complex with Pmt1p, can instead interact with Pmt5p; antifungal drug target; PMT2 has a paralog, PMT3, that arose from the whole genome duplication
YAL024C	LTE1	1	101565	105872	C	mitotic regulator LTE1|MSI2	3.37735		Abundance_Low		Abundance_Low	Protein similar to GDP/GTP exchange factors; without detectable GEF activity; required for asymmetric localization of Bfa1p at daughter-directed spindle pole bodies and for mitotic exit at low temperatures
YAL025C	MAK16	1	100225	101145	C	ribosome biosynthesis protein MAK16	7.55839					Essential nuclear protein; constituent of 66S pre-ribosomal particles; required for maturation of 25S and 5.8S rRNAs; required for maintenance of M1 satellite double-stranded RNA of the L-A virus
YAL026C	DRS2	1	95630	99697	C	aminophospholipid-translocating P4-type ATPase DRS2|SWA3|FUN38	4.80598	214.5		113.3		Trans-golgi network aminophospholipid translocase (flippase); maintains membrane lipid asymmetry in post-Golgi secretory vesicles; contributes to clathrin-coated vesicle formation, endocytosis, protein trafficking between the Golgi and endosomal system and the cellular response to mating pheromone; autoinhibited by its C-terminal tail; localizes to the trans-Golgi network; mutations in human homo…
YAL026C-A	YAL026C-A	1	95386	95823	C							Dubious open reading frame; unlikely to encode a functional protein, based on available experimental and comparative sequence data; partially overlaps the uncharacterized ORF YAL027W and the verified gene DRS2
YAL027W	SAW1	1	94687	95472	W	DNA-binding protein SAW1	4.78038		Abundance_Low		Abundance_Low	5'- and 3'-flap DNA binding protein; recruits Rad1p-Rad10p to single-strand annealing intermediates with 3' non-homologous tails for removal during double-strand break repair; complexes with Rad1p-Rad10p and stimulates its endonuclease activity; green fluorescent protein (GFP)-fusion protein localizes to the nucleus
YAL028W	FRT2	1	92900	94486	W	HPH2	2.92895					Tail-anchored ER membrane protein of unknown function; interacts with homolog Frt1p; promotes growth in conditions of high Na+, alkaline pH, or cell wall stress, possibly via a role in posttranslational translocation; potential Cdc28p substrate; FRT2 has a paralog, FRT1, that arose from the whole genome duplication
YAL029C	MYO4	1	87855	92270	C	myosin 4|SHE1|FUN22	5.22711	112		118		Type V myosin motor involved in actin-based transport of cargos; required for mRNA transport, including ASH1 mRNA, and facilitating the growth and movement of ER tubules into the growing bud along with She3p; MYO4 has a paralog, MYO2, that arose from the whole genome duplication
YAL030W	SNC1	1	87286	87752	W	SNAP receptor SNC1	7.38102					Vesicle membrane receptor protein (v-SNARE); involved in the fusion between Golgi-derived secretory vesicles with the plasma membrane; proposed to be involved in endocytosis; member of the synaptobrevin/VAMP family of R-type v-SNARE proteins; SNC1 has a paralog, SNC2, that arose from the whole genome duplication
YAL031C	GIP4	1	84749	87031	C	protein phosphatase regulator GIP4|FUN21	4.51022		Abundance_Low	58.5		Cytoplasmic protein that regulates protein phosphatase 1 Glc7p; protein overexpression relocalizes Glc7p from the nucleus and prevents chromosome segregation; potential Cdc28p substrate
YAL031W-A	YAL031W-A	1	84669	84977	W							Dubious open reading frame; unlikely to encode a functional protein, based on available experimental and comparative sequence data; partially overlaps ORF GIP4/YAL031C
YAL032C	PRP45	1	83335	84474	C	mRNA splicing protein PRP45|FUN20	5.25817	47			Abundance_Low	Protein required for pre-mRNA splicing; associates with the spliceosome and interacts with splicing factors Prp22p and Prp46p; orthologous to human transcriptional coactivator SKIP and can activate transcription of a reporter gene
YAL033W	POP5	1	82706	83227	W	RNA-binding protein POP5|FUN53	6.02844	295.5		302.8		Subunit of both RNase MRP and nuclear RNase P; RNase MRP cleaves pre-rRNA, while nuclear RNase P cleaves tRNA precursors to generate mature 5' ends and facilitates turnover of nuclear RNAs
YAL034C	FUN19	1	80710	81951	C		5.04878					Non-essential protein of unknown function; expression induced in response to heat stress; FUN19 has a paralog, YOR338W, that arose from the whole genome duplication
YAL034C-B	YAL034C-B	1	79489	79842	C	YAL035C-A						Dubious open reading frame; unlikely to encode a functional protein, based on available experimental and comparative sequence data
YAL034W-A	MTW1	1	79718	80587	W	MIND complex subunit MTW1|NSL2|DSN3		90			Abundance_Low	Essential component of the MIND kinetochore complex; joins kinetochore subunits contacting DNA to those contacting microtubules; critical to kinetochore assembly; complex consists of Mtw1p Including Nnf1p-Nsl1p-Dsn1p (MIND)
YAL035W	FUN12	1	76427	79435	W	translation initiation factor eIF5B|eIF5B|yIF2	7.57496	2539		1874		Translation initiation factor eIF5B; GTPase that promotes Met-tRNAiMet binding to ribosomes and ribosomal subunit joining; promotes GTP-dependent maturation of 18S rRNA by Nob1p; protein abundance increases in response to DNA replication stress; homolog of bacterial IF2
YAL036C	RBG1	1	75043	76152	C	GTP-binding protein RBG1|FUN11	7.22072	823.5		414.5		Member of the DRG family of GTP-binding proteins; associates with translating ribosomes; interacts with Tma46p, Ygr250cp, Gir2p and Yap1p via two-hybrid
YAL037C-A	YAL037C-A	1	73426	73518	C							Putative protein of unknown function
YAL037C-B	YAL037C-B	1	72326	73300	C							Dubious open reading frame; unlikely to encode a functional protein, based on available experimental and comparative sequence data; identified by gene-trapping, microarray-based expression analysis, and genome-wide homology searching
YAL037W	YAL037W	1	74020	74823	W		3.89841					Putative protein of unknown function; YAL037W has a paralog, YOR342C, that arose from the whole genome duplication
YAL038W	CDC19	1	71786	73288	W	pyruvate kinase CDC19|PYK1	11.975	11386.5		9188		Pyruvate kinase; functions as a homotetramer in glycolysis to convert phosphoenolpyruvate to pyruvate, the input for aerobic (TCA cycle) or anaerobic (glucose fermentation) respiration; regulated via allosteric activation by fructose bisphosphate; CDC19 has a paralog, PYK2, that arose from the whole genome duplication
YAL039C	CYC3	1	68716	69525	C	holocytochrome c synthase CYC3|CCHL	6.7307	49.5			Abundance_Low	Cytochrome c heme lyase (holocytochrome c synthase); attaches heme to apo-cytochrome c (Cyc1p or Cyc7p) in mitochondrial intermembrane space; human homolog HCCS implicated in microphthalmia with linear skin defects (MLS), and can complement yeast null mutant
YAL040C	CLN3	1	65778	67520	C	cyclin CLN3|WHI1|FUN10|DAF1	6.3813					G1 cyclin involved in cell cycle progression; activates Cdc28p kinase to promote G1 to S phase transition; plays a role in regulating transcription of other G1 cyclins, CLN1 and CLN2; regulated by phosphorylation and proteolysis; acetyl-CoA induces CLN3 transcription in response to nutrient repletion to promote cell-cycle entry; cell cycle arrest phenotype of the cln1 cln2 cln3 triple null mutant…
YAL041W	CDC24	1	62840	65404	W	Rho family guanine nucleotide exchange factor CDC24|CLS4	5.55682	114.5		131		Guanine nucleotide exchange factor (GEF) for Cdc42p; required for polarity establishment and maintenance, and mutants have morphological defects in bud formation and shmooing; relocalizes from nucleus to cytoplasm upon DNA replication stress; thermosensitivity of the cdc24-4 mutant in the presence of sorbitol is functionally complemented by human CDC42
YAL042C-A	YAL042C-A	1	61231	61608	C	YAL043C-A						Dubious open reading frame; unlikely to encode a functional protein, based on available experimental and comparative sequence data; partially overlaps verified ORF ERV46/YAL042W; YAL042C-A is a non-essential gene
YAL042W	ERV46	1	61316	62563	W	FUN9	7.76848					Protein localized to COPII-coated vesicles; forms a complex with Erv41p; involved in the membrane fusion stage of transport
YAL043C	PTA1	1	58695	61052	C	RNA-processing protein PTA1|FUN39	5.57141	99		84		Subunit of holo-CPF; holo-CPF is a multiprotein complex and functional homolog of mammalian CPSF, required for the cleavage and polyadenylation of mRNA and snoRNA 3' ends; involved in pre-tRNA processing; binds to the phosphorylated CTD of RNAPII
YAL044C	GCV3	1	57950	58462	C	glycine decarboxylase subunit H	9.40444	495.5		2739.6		H subunit of the mitochondrial glycine decarboxylase complex; glycine decarboxylase is required for the catabolism of glycine to 5,10-methylene-THF; also required for all protein lipoylation; expression is regulated by levels of 5,10-methylene-THF
YAL044W-A	BOL1	1	57518	57850	W							Mitochondrial matrix protein involved in Fe-S cluster biogenesis; facilitates [4Fe-2S] cluster inception into mitochondrial proteins such as lipoate synthase and succinate dehydrogenase; interacts and may function with Grx5p at an early step in Fe-S cluster biosynthesis; forms dimeric complexes with Grx5p and Nfu1p that alter the stability of shared Fe/S clusters; sequence similarity to human BOL…
YAL045C	YAL045C	1	57488	57796	C							Dubious open reading frame; unlikely to encode a functional protein, based on available experimental and comparative sequence data; almost completely overlaps YAL044W-A
YAL046C	BOL3	1	57029	57385	C	AIM1	5.96329					Protein involved in Fe-S cluster transfer to mitochondrial clients; protects [4Fe-4S] clusters from damage due to oxidative stress by acting along with Nfu1p at a late step in the transfer of [4Fe-4S] clusters from the ISA complex to mitochondrial client proteins like lipoate synthase and succinate dehydrogenase; sequence similarity to human BOLA family member, BOLA3, mutations of which are assoc…
YAL047C	SPC72	1	54989	56857	C	gamma-tubulin complex subunit SPC72|LDB4	4.17952		Abundance_Low		Failed_QC/Abundance_Low	Gamma-tubulin small complex (gamma-TuSC) receptor; recruits the gamma-TuSC complex to the cytoplasmic side of the SPB, connecting nuclear microtubules to the SPB; involved in astral microtubule formation, stabilization, and with Stu2p, anchoring astral MTs at the cytoplasmic face of the SPB, and regulating plus-end MT dynamics; regulated by Cdc5 kinase
YAL047W-A	YAL047W-A	1	54584	54913	W							Dubious open reading frame; unlikely to encode a functional protein, based on available experimental and comparative sequence data; partially overlaps ORF GEM1/YAL048C
YAL048C	GEM1	1	52801	54789	C	ERMES complex Ca(2+)-binding regulatory GTPase GEM1|GON1	4.21148					Outer mitochondrial membrane GTPase, subunit of the ERMES complex; potential regulatory subunit of the ERMES complex that links the ER to mitochondria and may promote inter-organellar calcium and phospholipid exchange as well as coordinating mitochondrial DNA replication and growth; cells lacking Gem1p contain collapsed, globular, or grape-like mitochondria; ortholog of metazoan Miro GTPases
YAL049C	AIM2	1	51855	52595	C	protein AIM2	7.51483		Abundance_Low		Abundance_Low	Cytoplasmic protein involved in mitochondrial function or organization; null mutant displays reduced frequency of mitochondrial genome loss; potential Hsp82p interactor
YAL051W	OAF1	1	48564	51707	W	oleate-activated transcription factor OAF1|YAF1	4.17371					Oleate-activated transcription factor; subunit of a heterodimeric complex with Pip2p, which binds to oleate-response elements (ORE) in the promoter of genes involved in beta-oxidation of fatty acids, peroxisome organization and biogenesis, activating transcription in the presence of oleate; regulates chromatin silencing at telomeres; involved in diauxic shift; OAF1 has a paralog, PIP2, that arose…
YAL053W	FLC2	1	45899	48250	W	flavin adenine dinucleotide transporter FLC2|HUF2	6.57124		Abundance_Low	62.3		Putative calcium channel involved in calcium release under hypotonic stress; required for uptake of FAD into endoplasmic reticulum; involved in cell wall maintenance; FLC2 has a paralog, YOR365C, that arose from the whole genome duplication
YAL054C	ACS1	1	42881	45022	C	acetate--CoA ligase 1|FUN44	2.96861		Abundance_Low		Abundance_Low	Acetyl-coA synthetase isoform; along with Acs2p, acetyl-coA synthetase isoform is the nuclear source of acetyl-coA for histone acetylation; expressed during growth on nonfermentable carbon sources and under aerobic conditions
YAL055W	PEX22	1	42177	42719	W	ubiquitin-protein transferase activating protein PEX22|YAF5	5.12679		Abundance_Low		Abundance_Low	Putative peroxisomal membrane protein; required for import of peroxisomal proteins; functionally complements a Pichia pastoris pex22 mutation
YAL056C-A	YAL056C-A	1	38696	39046	C	YAL058C-A						Dubious open reading frame; unlikely to encode a functional protein, based on available experimental and comparative sequence data
YAL056W	GPB2	1	39259	41901	W	KRH1	5.61598		Abundance_Low		Abundance_Low	Multistep regulator of cAMP-PKA signaling; inhibits PKA downstream of Gpa2p and Cyr1p, thereby increasing cAMP dependency; inhibits Ras activity through direct interactions with Ira1p/2p; regulated by G-alpha protein Gpa2p; GPB2 has a paralog, GPB1, that arose from the whole genome duplication
YAL058W	CNE1	1	37464	38972	W	calnexin|FUN48	4.90221		Abundance_Low		Abundance_Low	Calnexin; integral membrane ER chaperone involved in folding and quality control of glycoproteins; chaperone activity is inhibited by Mpd1p, with which Cne1p interacts; 24% identical to mammalian calnexin; Ca+ binding not yet shown in yeast
YAL059C-A	YAL059C-A	1	36496	36918	C							Dubious open reading frame; unlikely to encode a functional protein, based on available experimental and comparative sequence data; partially overlaps verified gene ECM1/YAL059W
YAL059W	ECM1	1	36509	37147	W		6.24378	200.5		81		Pre-ribosomal factor involved in 60S ribosomal protein subunit export; associates with the pre-60S particle; shuttles between the nucleus and cytoplasm
YAL060W	BDH1	1	35155	36303	W	(R,R)-butanediol dehydrogenase|BDH	7.38741	536.5		1372		NAD-dependent (R,R)-butanediol dehydrogenase; catalyzes oxidation of (R,R)-2,3-butanediol to (3R)-acetoin, oxidation of meso-butanediol to (3S)-acetoin, and reduction of acetoin; enhances use of 2,3-butanediol as an aerobic carbon source
YAL061W	BDH2	1	33448	34701	W	putative dehydrogenase BDH2	5.19517	47.5		129		Putative medium-chain alcohol dehydrogenase with similarity to BDH1; transcription induced by constitutively active PDR1 and PDR3
YAL062W	GDH3	1	31567	32940	W	glutamate dehydrogenase (NADP(+)) GDH3|FUN51	4.05538					NADP(+)-dependent glutamate dehydrogenase; synthesizes glutamate from ammonia and alpha-ketoglutarate; rate of alpha-ketoglutarate utilization differs from Gdh1p; expression regulated by nitrogen and carbon sources; GDH3 has a paralog, GDH1, that arose from the whole genome duplication
YAL063C	FLO9	1	24000	27968	C	flocculin FLO9						Lectin-like protein with similarity to Flo1p; thought to be expressed and involved in flocculation
YAL063C-A	YAL063C-A	1	22395	22685	C							Putative protein of unknown function; identified by expression profiling and mass spectrometry
YAL064C-A	TDA8	1	13363	13743	C	YAL065C-A						Putative protein of unknown function; null mutant is sensitive to expression of the top1-T722A allele; not an essential gene
YAL064W	YAL064W	1	21566	21850	W							Protein of unknown function; may interact with ribosomes, based on co-purification experiments
YAL064W-B	YAL064W-B	1	12046	12426	W							Fungal-specific protein of unknown function
YAL065C	YAL065C	1	11565	11951	C							Putative protein of unknown function; shows sequence similarity to FLO1 and other flocculins
YAL066W	YAL066W	1	10091	10399	W							Dubious open reading frame; unlikely to encode a functional protein, based on available experimental and comparative sequence data
YAL067C	SEO1	1	7235	9016	C	putative permease SEO1						Putative permease; member of the allantoate transporter subfamily of the major facilitator superfamily; mutation confers resistance to ethionine sulfoxide
YAL067W-A	YAL067W-A	1	2480	2707	W							Putative protein of unknown function; identified by gene-trapping, microarray-based expression analysis, and genome-wide homology searching
YAL068C	PAU8	1	1807	2169	C	seripauperin PAU8						Protein of unknown function; member of the seripauperin multigene family encoded mainly in subtelomeric regions
YAL068W-A	YAL068W-A	1	538	792	W							Dubious open reading frame; unlikely to encode a functional protein, based on available experimental and comparative sequence data; identified by gene-trapping, microarray-based expression analysis, and genome-wide homology searching
YAL069W	YAL069W	1	335	649	W							Dubious open reading frame; unlikely to encode a functional protein, based on available experimental and comparative sequence data
YAR002C-A	ERP1	1	154065	154724	C			1049		538.5		Member of the p24 family involved in ER to Golgi transport; role in misfolded protein quality control; forms heterotrimeric complex with Erp2p, Emp24p, and Erv25p; localized to COPII-coated vesicles; ERP1 has a paralog, ERP6, that arose from the whole genome duplication
YAR002W	NUP60	1	152257	153876	W	FG-nucleoporin NUP60	6.1111	174		140.5		FG-nucleoporin component of central core of the nuclear pore complex; contributes directly to nucleocytoplasmic transport and maintenance of the nuclear pore complex (NPC) permeability barrier and is involved in gene tethering at the nuclear periphery; relocalizes to the cytosol in response to hypoxia; both NUP1 and NUP60 are homologous to human NUP153
YAR003W	SWD1	1	155005	156285	W	COMPASS subunit protein SWD1|SAF49|CPS50|FUN16	5.33617		Abundance_Low		Abundance_Low	Subunit of the COMPASS (Set1C) complex; COMPASS methylates histone H3 on lysine 4 and is required in transcriptional silencing near telomeres; WD40 beta propeller superfamily member with similarity to mammalian Rbbp7
YAR007C	RFA1	1	156754	158619	C	replication factor A subunit protein RFA1|RPA70|RPA1|FUN3|BUF2	6.1088		Failed_QC	375.5		Subunit of heterotrimeric Replication Protein A (RPA); RPA is a highly conserved single-stranded DNA binding protein involved in DNA replication, repair, and recombination; RPA protects against inappropriate telomere recombination, and upon telomere uncapping, prevents cell proliferation by a checkpoint-independent pathway; role in DNA catenation/decatenation pathway of chromosome disentangling; …
YAR008W	SEN34	1	158966	159793	W	tRNA splicing endonuclease subunit SEN34|FUN4	5.66357					Subunit of the tRNA splicing endonuclease; tRNA splicing endonuclease (Sen complex) is composed of Sen2p, Sen15p, Sen34p, and Sen54p; Sen complex also cleaves the CBP1 mRNA at the mitochondrial surface; Sen34p contains the active site for tRNA 3' splice site cleavage and has similarity to Sen2p and to Archaeal tRNA splicing endonuclease
YAR014C	BUD14	1	166742	168871	C	protein phosphatase regulator BUD14	5.93365	185		146		Protein involved in bud-site selection; Bud14p-Glc7p complex is a cortical regulator of dynein; forms a complex with Kel1p and Kel2p that regulates Bnr1p (formin) to affect actin cable assembly, cytokinesis, and polarized growth; diploid mutants display a random budding pattern instead of the wild-type bipolar pattern; relative distribution to the nucleus increases upon DNA replication stress
YAR015W	ADE1	1	169375	170295	W	phosphoribosylaminoimidazolesuccinocarboxamide synthase	8.68844	1013		2335		N-succinyl-5-aminoimidazole-4-carboxamide ribotide synthetase; required for 'de novo' purine nucleotide biosynthesis; red pigment accumulates in mutant cells deprived of adenine; protein abundance increases in response to DNA replication stress
YAR018C	KIN3	1	170396	171703	C	serine/threonine protein kinase KIN3|NPK1|FUN52	5.69142					Nonessential serine/threonine protein kinase; possible role in DNA damage response; influences tolerance to high levels of ethanol
YAR019C	CDC15	1	172211	175135	C	serine/threonine protein kinase CDC15|LYT1	3.61861		Abundance_Low		Abundance_Low	Protein kinase of the Mitotic Exit Network; localized to the spindle pole bodies at late anaphase; promotes mitotic exit by directly switching on the kinase activity of Dbf2p; required for spindle disassembly after meiosis II; relocalizes to the cytoplasm upon DNA replication stress
YAR019W-A	YAR019W-A	1	174998	175330	W							Dubious open reading frame; unlikely to encode a functional protein, based on available experimental and comparative sequence data; partially overlaps ORF CDC15/YAR019C
YAR020C	PAU7	1	176856	177023	C	seripauperin PAU7	0.774366					Member of the seripauperin multigene family; active during alcoholic fermentation, regulated by anaerobiosis, inhibited by oxygen, repressed by heme
YAR023C	YAR023C	1	179281	179820	C	DUP240 family protein	3.54166					Putative integral membrane protein; member of DUP240 gene family
YAR027W	UIP3	1	183770	184477	W	DUP240 family protein UIP3	5.41148		Abundance_Low		Abundance_Low	Putative integral membrane protein of unknown function; interacts with Ulp1p at the nuclear periphery; member of DUP240 gene family
YAR028W	YAR028W	1	184892	185596	W	DUP240 family protein	3.6075	129.5			Abundance_Low	Putative integral membrane protein; member of DUP240 gene family; GFP-fusion protein is induced in response to the DNA-damaging agent MMS
YAR029W	YAR029W	1	186321	186545	W	DUP240 family protein	2.18087					Member of DUP240 gene family but contains no transmembrane domains; green fluorescent protein (GFP)-fusion protein localizes to the cytoplasm in a punctate pattern
YAR030C	YAR030C	1	186512	186853	C							Dubious open reading frame; unlikely to encode a functional protein, based on available experimental and comparative sequence data; partially overlaps the uncharacterized ORF YAR029W and the verified gene PRM9
YAR031W	PRM9	1	186836	187732	W	pheromone-regulated DUP240 family protein PRM9						Pheromone-regulated protein; contains 3 predicted transmembrane segments and an FF sequence, a motif involved in COPII binding; member of DUP240 gene family; PRM9 has a paralog, PRM8, that arose from a segmental duplication
YAR033W	MST28	1	188107	188811	W	DUP240 family protein MST28	2.07071					Putative integral membrane protein, involved in vesicle formation; forms complex with Mst27p; member of DUP240 gene family; binds COPI and COPII vesicles; MST28 has a paralog, MST27, that arose from a segmental duplication
YAR035C-A	YAR035C-A	1	192337	192417	C							Putative protein of unknown function; identified by gene-trapping, microarray-based expression analysis, and genome-wide homology searching; predicted to have a role in cell budding based on computational "guilt by association" analysis
YAR035W	YAT1	1	190193	192256	W	carnitine O-acetyltransferase YAT1	2.83903					Outer mitochondrial carnitine acetyltransferase; minor ethanol-inducible enzyme involved in transport of activated acyl groups from the cytoplasm into the mitochondrial matrix; phosphorylated
YAR042W	SWH1	1	192619	196185	W	oxysterol-binding protein related protein SWH1|OSH1|YAR044W	4.71305	22.44		24.18	21.45
YAR047C	YAR047C	1	201467	201787	C							Dubious open reading frame; unlikely to encode a functional protein, based on available experimental and comparative sequence data
YAR050W	FLO1	1	203403	208016	W	flocculin FLO1|FLO4|FLO2	1.33392					Lectin-like protein involved in flocculation; cell wall protein that binds mannose chains on the surface of other cells, confers floc-forming ability that is chymotrypsin sensitive and heat resistant; important for co-flocculation with other yeasts, mediating interaction with specific species; FLO1 has a paralog, FLO5, that arose from a segmental duplication
YAR053W	YAR053W	1	208367	208663	W							Dubious open reading frame; unlikely to encode a functional protein, based on available experimental and comparative sequence data
YAR060C	YAR060C	1	217157	217492	C							Dubious open reading frame; unlikely to encode a functional protein, based on available experimental and comparative sequence data; YAR060C has a paralog, YHR212C, that arose from a segmental duplication
YAR064W	YAR064W	1	220198	220497	W							Pseudogenic fragment with similarity to flocculins; YAR064W has a paralog, YHR213W-B, that arose from a segmental duplication
YAR066W	YAR066W	1	221049	221660	W							Putative GPI protein; SWAT-GFP and mCherry fusion proteins localize to the endoplasmic reticulum and vacuole respectively; YAR066W has a paralog, YHR214W, that arose from a segmental duplication
YAR068W	YAR068W	1	222406	222891	W							Fungal-specific protein of unknown function; induced in respiratory-deficient cells; YAR068W has a paralog, YHR214W-A, that arose from a segmental duplication
YAR069C	YAR069C	1	224011	224304	C							Dubious open reading frame; unlikely to encode a protein, based on available experimental and comparative sequence data; YAR069C has a paralog, YHR214C-D, that arose from a segmental duplication
YAR070C	YAR070C	1	224563	224862	C							Dubious open reading frame; unlikely to encode a protein, based on available experimental and comparative sequence data; YAR070C has a paralog, YHR214C-B, that arose from a segmental duplication
YAR071W	PHO11	1	225460	226863	W	acid phosphatase PHO11	1.08876	55			Abundance_Low	One of three repressible acid phosphatases; glycoprotein that is transported to the cell surface by the secretory pathway; induced by phosphate starvation and coordinately regulated by PHO4 and PHO2; PHO11 has a paralog, PHO12, that arose from a segmental duplication
YAR073W	IMD1	1	227742	228953	W							Nonfunctional protein with homology to IMP dehydrogenase; blocked reading frame, located close to the telomere; not expressed at detectable levels; YAR073W and YAR075W comprise a continuous reading frame in most strains of S. cerevisiae; YAR073W/YAR075W together have a paralog, IMD2, that arose from a segmental duplication
YAR075W	YAR075W	1	228844	229317	W							Non-functional protein with homology IMP dehydrogenase; YAR073W/IMD1 and YAR075W comprise a continuous reading frame in most strains of S. cerevisiae; YAR073W/YAR075W together have a paralog, IMD2, that arose from a segmental duplication
YBL001C	ECM15	2	237153	237467	C		9.2024		Abundance_Low		Abundance_Low	Non-essential protein of unknown function; likely exists as tetramer, may be regulated by the binding of small-molecule ligands (possibly sulfate ions), may have a role in yeast cell-wall biogenesis
YBL002W	HTB2	2	236492	236887	W	histone H2B	10.2819	6460		5540.3		Histone H2B; core histone protein required for chromatin assembly and chromosome function; nearly identical to HTB1; Rad6p-Bre1p-Lge1p mediated ubiquitination regulates reassembly after DNA replication, transcriptional activation, meiotic DSB formation and H3 methylation
YBL003C	HTA2	2	235394	235792	C	histone H2A|H2A2	10.2189	4086		4040.5		Histone H2A; core histone protein required for chromatin assembly and chromosome function; one of two nearly identical (see also HTA1) subtypes; DNA damage-dependent phosphorylation by Mec1p facilitates DNA repair; acetylated by Nat4p
YBL004W	UTP20	2	227636	235117	W		4.41871	269		103.3		Component of the small-subunit (SSU) processome; SSU processome is involved in the biogenesis of the 18S rRNA
YBL005W	PDR3	2	217470	220400	W	drug-responsive transcription factor PDR3|TPE2|AMY2	3.90508		Abundance_Low		Abundance_Low	Transcriptional activator of the pleiotropic drug resistance network; regulates expression of ATP-binding cassette (ABC) transporters through binding to cis-acting PDRE sites (PDR responsive elements); has a role in response to drugs and organic solvents; post-translationally up-regulated in cells lacking functional mitochondrial genome; involved in diauxic shift; relative distribution to nucleus…
YBL006C	LDB7	2	216587	217129	C	RSC14	6.90116					Component of the RSC chromatin remodeling complex; interacts with Rsc3p, Rsc30p, Npl6p, and Htl1p to form a module important for a broad range of RSC functions
YBL006W-A	YBL006W-A	2	216711	216860	W							Dubious open reading frame; unlikely to encode a functional protein, based on available experimental and comparative sequence data; completely overlaps the verified gene LDB7/YBL006C
YBL007C	SLA1	2	212632	216366	C	cytoskeletal protein-binding protein SLA1	6.1143	585		665		Cytoskeletal protein binding protein; required for assembly of the cortical actin cytoskeleton; interacts with proteins regulating actin dynamics and proteins required for endocytosis; found in the nucleus and cell cortex; has 3 SH3 domains
YBL008W	HIR1	2	209653	212175	W		4.59863		Abundance_Low		Abundance_Low	Subunit of the HIR complex; HIR is a nucleosome assembly complex involved in regulation of histone gene transcription; contributes to nucleosome formation, heterochromatic gene silencing, and formation of functional kinetochores
YBL008W-A	YBL008W-A	2	209409	209648	W							Putative protein of unknown function; identified by fungal homology and RT-PCR
YBL009W	ALK2	2	207194	209224	W	protein kinase ALK2	5.45267					Protein kinase; along with its paralog, ALK1, required for proper spindle positioning and nuclear segregation following mitotic arrest, proper organization of cell polarity factors in mitosis, proper localization of formins and polarity factors, and survival in cells that activate spindle assembly checkpoint; phosphorylated in response to DNA damage; ALK2 has a paralog, ALK1, that arose from the …
YBL010C	YBL010C	2	206107	206949	C		5.46813		Abundance_Low		Abundance_Low	Putative protein of unknown function; green fluorescent protein (GFP)-fusion protein colocalizes with clathrin-coated vesicles
YBL011W	SCT1	2	203538	205817	W	bifunctional glycerol-3-phosphate/glycerone-phosphate O-acyltransferase SCT1|GAT2	5.52848	193.5		128.8		Glycerol 3-phosphate/dihydroxyacetone phosphate sn-1 acyltransferase; dual substrate-specific acyltransferase of the glycerolipid biosynthesis pathway; prefers 16-carbon fatty acids; similar to Gpt2p; gene is constitutively transcribed
YBL012C	YBL012C	2	203406	203807	C							Dubious open reading frame; unlikely to encode a functional protein, based on available experimental and comparative sequence data
YBL013W	FMT1	2	202056	203261	W	methionyl-tRNA formyltransferase	2.61991		Abundance_Low		Abundance_Low	Methionyl-tRNA formyltransferase; catalyzes the formylation of initiator Met-tRNA in mitochondria; potential Cdc28p substrate
YBL014C	RRN6	2	199064	201748	C		4.74735		Abundance_Low		Abundance_Low	Component of the core factor (CF) rDNA transcription factor complex; CF is required for transcription of 35S rRNA genes by RNA polymerase I and is composed of Rrn6p, Rrn7p, and Rrn11p
YBL015W	ACH1	2	194122	195702	W	acetyl-CoA hydrolase	5.38427	47.5		205		Protein with CoA transferase activity; particularly for CoASH transfer from succinyl-CoA to acetate; has minor acetyl-CoA-hydrolase activity; phosphorylated; required for acetate utilization and for diploid pseudohyphal growth
YBL016W	FUS3	2	192451	193512	W	mitogen-activated serine/threonine-protein kinase FUS3|DAC2	6.6028	367.5		216.5		Mitogen-activated serine/threonine protein kinase involved in mating; phosphoactivated by Ste7p; substrates include Ste12p, Far1p, Bni1p, Sst2p; inhibits invasive growth during mating by phosphorylating Tec1p, promoting its; inhibits recruitment of Ste5p, Cdc42p-mediated asymmetry and mating morphogenesis
YBL017C	PEP1	2	186844	191583	C	type I sorting receptor|VPT1|VPS10	5.7414	305.5		219.5		Type I transmembrane sorting receptor for multiple vacuolar hydrolases; cycles between the late-Golgi and prevacuolar endosome-like compartments
YBL018C	POP8	2	185998	186474	C	ribonuclease P	6.22217		Abundance_Low		Abundance_Low	Subunit of both RNase MRP and nuclear RNase P; RNase MRP cleaves pre-rRNA, while nuclear RNase P cleaves tRNA precursors to generate mature 5' ends and facilitates turnover of nuclear RNAs; relocalizes to the cytosol in response to hypoxia
YBL019W	APN2	2	184353	185915	W	DNA-(apurinic or apyrimidinic site) lyase APN2|ETH1	4.32829		Abundance_Low		Abundance_Low	Class II abasic (AP) endonuclease involved in repair of DNA damage; homolog of human HAP1 and E. coli exoIII
YBL020W	RFT1	2	182401	184125	W	glycolipid translocation protein	5.37796					Membrane protein required for translocation of Man5GlcNac2-PP-Dol; required for translocation of Man5GlcNac2-PP-Dol from the cytoplasmic side to the lumenal side of the ER membrane but is not the flippase; mutation is suppressed by expression of human p53 protein; essential gene
YBL021C	HAP3	2	181660	182094	C		5.49996	54		88.6		Subunit of the Hap2p/3p/4p/5p CCAAT-binding complex; complex is heme-activated and glucose-repressed; complex is a transcriptional activator and global regulator of respiratory gene expression; contains sequences contributing to both complex assembly and DNA binding
YBL022C	PIM1	2	177874	181275	C	ATP-dependent Lon protease PIM1|LON1	6.12604	91		143.3		ATP-dependent Lon protease; involved in degradation of misfolded proteins in mitochondria; required for biogenesis and maintenance of mitochondria
YBL023C	MCM2	2	174920	177526	C	MCM DNA helicase complex subunit MCM2	4.93379	145		115		Protein involved in DNA replication; component of the Mcm2-7 hexameric helicase complex that binds chromatin as a part of the pre-replicative complex; relative distribution to the nucleus increases upon DNA replication stress
YBL024W	NCL1	2	172534	174588	W	tRNA (cytosine-C5-)-methyltransferase|TRM4	6.77094	721		318		S-adenosyl-L-methionine-dependent tRNA: m5C-methyltransferase; methylates cytosine to m5C at several positions in tRNAs and intron-containing pre-tRNAs; increases proportion of tRNALeu(CAA) with m5C at wobble position in response to hydrogen peroxide, causing selective translation of mRNA from genes enriched in TTG codon; loss of NCL1 confers hypersensitivity to oxidative stress; similar to Nop2p…
YBL025W	RRN10	2	171481	171918	W		4.9651		Abundance_Low		Abundance_Low	Protein involved in promoting high level transcription of rDNA; subunit of UAF (upstream activation factor) for RNA polymerase I
YBL026W	LSM2	2	170623	171038	W	Sm-like protein LSM2|SNP3|SMX5	7.62371	273		296.6		Lsm (Like Sm) protein; part of heteroheptameric complexes (Lsm2p-7p and either Lsm1p or 8p): cytoplasmic Lsm1p complex involved in mRNA decay; nuclear Lsm8p complex part of U6 snRNP and possibly involved in processing tRNA, snoRNA, and rRNA; relocalizes from nucleus to cytoplasmic foci upon DNA replication stress
YBL027W	RPL19B	2	168423	169376	W	eL19|ribosomal 60S subunit protein L19B|L19e|rpl5L|YL14|L23B|L19B	11.1876	4134.5		3397		Ribosomal 60S subunit protein L19B; rpl19a and rpl19b single null mutations result in slow growth, while the double null mutation is lethal; homologous to mammalian ribosomal protein L19, no bacterial homolog; RPL19B has a paralog, RPL19A, that arose from the whole genome duplication
YBL028C	YBL028C	2	167518	167838	C		7.65061	660.5		360.3		Protein of unknown function that may interact with ribosomes; green fluorescent protein (GFP)-fusion protein localizes to the nucleolus; predicted to be involved in ribosome biogenesis
YBL029C-A	YBL029C-A	2	164488	164772	C			135.5		156.8		Protein of unknown function; green fluorescent protein (GFP)-fusion protein localizes to the cell periphery; protein abundance increases in response to DNA replication stress; has potential orthologs in Saccharomyces species and in Yarrowia lipolytica
YBL029W	YBL029W	2	166134	167264	W		4.70451		Abundance_Low		Abundance_Low	Non-essential protein of unknown function
YBL030C	PET9	2	163041	163997	C	ADP/ATP carrier protein PET9|OP1|ANC2|AAC2	9.42607					Major ADP/ATP carrier of the mitochondrial inner membrane; exchanges cytosolic ADP for mitochondrially synthesized ATP; also imports heme and ATP; required for viability in many lab strains that carry a sal1 mutation; PET9 has a paralog, AAC3, that arose from the whole genome duplication; human homolog SLC25A4 implicated in progressive external ophthalmoplegia can complement yeast null mutant
YBL031W	SHE1	2	161699	162715	W		4.55142		Abundance_Low		Abundance_Low	Mitotic spindle protein; interacts with components of the Dam1 (DASH) complex, its effector Sli15p, and microtubule-associated protein Bim1p; also localizes to nuclear microtubules and to the bud neck in a ring-shaped structure; inhibits dynein function
YBL032W	HEK2	2	160184	161329	W	KHD1	6.89089	713.5		539.5		RNA binding protein involved in asymmetric localization of ASH1 mRNA; represses translation of ASH1 mRNA, an effect reversed by Yck1p-dependent phosphoryation; regulates telomere position effect and length; similarity to hnRNP-K
YBL033C	RIB1	2	158656	159693	C	GTP cyclohydrolase II	6.35625	254		313		GTP cyclohydrolase II; catalyzes the first step of the riboflavin biosynthesis pathway
YBL034C	STU1	2	153848	158389	C		3.55043		Failed_QC		Abundance_Low	Component of the mitotic spindle; binds to interpolar microtubules via its association with beta-tubulin (Tub2p); required for interpolar microtubules to provide an outward force on the spindle poles
YBL035C	POL12	2	151493	153610	C	DNA-directed DNA polymerase alpha subunit POL12	5.15898	58			Abundance_Low	B subunit of DNA polymerase alpha-primase complex; required for initiation of DNA replication during mitotic and premeiotic DNA synthesis; also functions in telomere capping and length regulation
YBL036C	YBL036C	2	150447	151220	C		7.12398	261.5		190.5		Putative non-specific single-domain racemase; based on structural similarity; binds pyridoxal 5'-phosphate; expression of GFP-fusion protein induced in response to the DNA-damaging agent MMS
YBL037W	APL3	2	147209	150286	W		4.5466	73.5		76		Alpha-adaptin; large subunit of the clathrin associated protein complex (AP-2); involved in vesicle mediated transport
YBL038W	MRPL16	2	146187	146885	W	RML16|mitochondrial 54S ribosomal protein YmL47|YmL47	6.88957		Abundance_Low	95.5		Mitochondrial ribosomal protein of the large subunit; homologous to bacterial L16 ribosomal protein; synthetic lethality with hac1 mutation suggests a possible role in synthesis of precursors for protein glycosylation
YBL039C	URA7	2	143989	145728	C	CTP synthase URA7	7.40284	1619.5			Failed_QC	Major CTP synthase isozyme (see also URA8); catalyzes the ATP-dependent transfer of the amide nitrogen from glutamine to UTP, forming CTP, the final step in de novo biosynthesis of pyrimidines; involved in phospholipid biosynthesis; capable of forming cytoplasmic filaments termed cytoophidium, especially during conditions of glucose depletion; URA7 has a paralog, URA8, that arose from the whole g…
YBL039C-A	YBL039C-A	2	144948	145031	C							Dubious open reading frame; unlikely to encode a functional protein, based on available experimental and comparative sequence data; completely overlaps the verified ORF URA7; identified by expression profiling and mass spectrometry
YBL039W-B	YBL039W-B	2	143393	143572	W	YBL039W-A						Putative protein of unknown function; mCherry fusion protein localizes to the vacuole
YBL040C	ERD2	2	142112	142868	C		7.38446	1911		815.5		HDEL receptor; an integral membrane protein that binds to the HDEL motif in proteins destined for retention in the endoplasmic reticulum; has a role in maintenance of normal levels of ER-resident proteins
YBL041W	PRE7	2	141247	141972	W	proteasome core particle subunit beta 6|PRS3	7.86646					Beta 6 subunit of the 20S proteasome
YBL042C	FUI1	2	138341	140260	C	uridine permease	5.48998	532		461		High affinity uridine permease, localizes to the plasma membrane; also mediates low but significant transport of the cytotoxic nucleoside analog 5-fluorouridine; not involved in uracil transport; relative distribution to the vacuole increases upon DNA replication stress
YBL043W	ECM13	2	136688	137461	W		4.15616					Non-essential protein of unknown function; induced by treatment with 8-methoxypsoralen and UVA irradiation; ECM13 has a paralog, YJR115W, that arose from the whole genome duplication
YBL044W	YBL044W	2	135998	136366	W		1.21989					Putative protein of unknown function; YBL044W is not an essential protein
YBL045C	COR1	2	134143	135516	C	ubiquinol--cytochrome-c reductase subunit COR1|QCR1	7.90294	297		466		Core subunit of the ubiquinol-cytochrome c reductase complex; the ubiquinol-cytochrome c reductase complex (bc1 complex) is a component of the mitochondrial inner membrane electron transport chain
YBL046W	PSY4	2	132424	133749	W	HSM6	5.29731	118.5		72.5		Regulatory subunit of protein phosphatase PP4; presence of Psy4p in the PP4 complex (along with catalytic subunit Pph3p and Psy2p) is required for dephosphorylation of the histone variant H2AX, but not for dephosphorylation of Rad53p, during recovery from the DNA damage checkpoint; localization is cell-cycle dependent and regulated by Cdc28p phosphorylation; required for cisplatin resistance; hom…
YBL047C	EDE1	2	127895	132040	C	BUD15	6.35339	955.5		1017.5		Scaffold protein involved in the formation of early endocytic sites; putative regulator of cytokinesis; homo-oligomerization is required for localization to and organization of endocytic sites; has a network of interactions with other endocytic proteins; binds membranes in a ubiquitin-dependent manner; may also bind ubiquitinated membrane-associated proteins; interacts with Cmk2 and functions ups…
YBL048W	RRT1	2	127299	127610	W		2.10446					Protein of unknown function; identified in a screen for mutants with increased levels of rDNA transcription; dubious open reading frame unlikely to encode a protein, based on experimental and comparative sequence data
YBL049W	MOH1	2	126828	127244	W		4.14267					Protein of unknown function, essential for stationary phase survival; not required for growth on nonfermentable carbon sources; possibly linked with vacuolar transport
YBL050W	SEC17	2	125125	126119	W	RNS3	7.06526					Alpha-SNAP cochaperone; SNARE-complex adaptor for Sec18 (NSF) during the disassembly of postfusion cis-SNARE complexes; stimulates the ATPase activity of Sec18p; peripheral membrane protein required for vesicular transport between ER and Golgi, the 'priming' step in homotypic vacuole fusion, and autophagy; similar to mammalian alpha-SNAP
YBL051C	PIN4	2	122753	124759	C	MDT1	5.66517	141.5		112.5		Protein involved in G2/M phase progression and response to DNA damage; interacts with Rad53p; contains an RNA recognition motif, a nuclear localization signal, and several SQ/TQ cluster domains; hyperphosphorylated in response to DNA damage
YBL052C	SAS3	2	119379	121874	C	KAT6	5.2473		Abundance_Low		Abundance_Low	Histone acetyltransferase catalytic subunit of NuA3 complex; acetylates histone H3, involved in transcriptional silencing; homolog of the mammalian MOZ proto-oncogene; mutant has aneuploidy tolerance; sas3gcn5 double mutation is lethal
YBL053W	YBL053W	2	119335	119709	W		1.5599					Dubious open reading frame; unlikely to encode a functional protein, based on available experimental and comparative sequence data
YBL054W	TOD6	2	117589	119166	W	PBF1	5.9432		Abundance_Low		Abundance_Low	PAC motif binding protein involved in rRNA and ribosome biogenesis; subunit of the RPD3L histone deacetylase complex; Myb-like HTH transcription factor; hypophosphorylated by rapamycin treatment in a Sch9p-dependent manner; activated in stochastic pulses of nuclear localization
YBL055C	YBL055C	2	115573	116829	C	3'-5'-exodeoxyribonuclease|Tat-D	5.83897	51.5			Abundance_Low	3'-->5' exonuclease and endonuclease with a possible role in apoptosis; has similarity to mammalian and C. elegans apoptotic nucleases
YBL056W	PTC3	2	113762	115168	W	type 2C protein phosphatase PTC3	7.34667	472		443.5		Type 2C protein phosphatase (PP2C); dephosphorylates Hog1p (see also Ptc2p) to limit maximal kinase activity induced by osmotic stress; dephosphorylates T169 phosphorylated Cdc28p (see also Ptc2p); role in DNA damage checkpoint inactivation; PTC3 has a paralog, PTC2, that arose from the whole genome duplication
YBL057C	PTH2	2	112801	113427	C	aminoacyl-tRNA hydrolase	6.79433		Abundance_Low		Abundance_Low	One of two mitochondrially-localized peptidyl-tRNA hydrolases; negatively regulates the ubiquitin-proteasome pathway via interactions with ubiquitin-like ubiquitin-associated proteins; dispensable for cell growth; see also PTH1
YBL058W	SHP1	2	111437	112708	W	protein phosphatase regulator SHP1|UBX1	7.14243	235		252		UBX domain-containing substrate adaptor for Cdc48p; ubiquitin regulatory X domain-containing protein that acts as a substrate recruiting cofactor for Cdc48p; positively regulates Glc7p PPase activity to promote growth and mitotic progression in complex with Cdc48p; ubiquitinated protein interactor involved in ER-associated degradation (ERAD); regulated by nuclear Ub-dependent degradation (INMAD p…
YBL059C-A	CMC2	2	110125	110539	C				Abundance_Low		Abundance_Low	Protein involved in respiratory chain complex assembly or maintenance; protein of the mitochondrial intermembrane space; contains twin Cx9C motifs that can form coiled coil-helix-coiled-coil helix fold
YBL059W	YBL059W	2	110594	111244	W		5.20677		Abundance_Low		Abundance_Low	Putative protein of unknown function; the authentic, non-tagged protein is detected in highly purified mitochondria in high-throughput studies; YBL059W has a paralog, YER093C-A, that arose from the whole genome duplication
YBL060W	YEL1	2	107932	109995	W	Arf family guanine nucleotide exchange factor YEL1	4.49737		Abundance_Low		Abundance_Low	Guanine nucleotide exchange factor specific for Arf3p; localized to the bud neck and tip; required for localization of Arf3p to the bud neck and tip
YBL061C	SKT5	2	105316	107406	C	CSD4|CHS4|CAL2	5.62507	184		76.4		Activator of Chs3p (chitin synthase III) during vegetative growth; recruits Chs3p to the bud neck via interaction with Bni4p; SKT5 has a paralog, SHC1, that arose from the whole genome duplication
YBL062W	YBL062W	2	105308	105688	W							Dubious open reading frame; unlikely to encode a functional protein, based on available experimental and comparative sequence data
YBL063W	KIP1	2	101886	105221	W	CIN9	4.02035		Abundance_Low		Abundance_Low	Kinesin-related motor protein; required for mitotic spindle assembly, chromosome segregation, and 2 micron plasmid partitioning; functionally redundant with Cin8p for chromosomal but not plasmid functions
YBL064C	PRX1	2	100371	101156	C	thioredoxin peroxidase PRX1	7.74437	203.5		226.5		Mitochondrial peroxiredoxin with thioredoxin peroxidase activity; has a role in reduction of hydroperoxides; reactivation requires Trr2p and glutathione; induced during respiratory growth and oxidative stress; phosphorylated; protein abundance increases in response to DNA replication stress
YBL065W	YBL065W	2	99963	100307	W							Dubious open reading frame; unlikely to encode a functional protein, based on available experimental and comparative sequence data; partially overlaps verified ORF SEF1/YBL066C; YBL065W is a non-essential gene
YBL066C	SEF1	2	96669	100115	C		3.88919					Putative transcription factor; has homolog in Kluyveromyces lactis
YBL067C	UBP13	2	93639	95882	C	ubiquitin-specific protease UBP13	5.00087		Abundance_Low		Abundance_Low	Ubiquitin-specific protease that cleaves Ub-protein fusions; UBP13 has a paralog, UBP9, that arose from the whole genome duplication
YBL068W	PRS4	2	92414	93394	W	ribose phosphate diphosphokinase subunit PRS4	6.28576	267.5		137		5-phospho-ribosyl-1(alpha)-pyrophosphate synthetase, synthesizes PRPP; which is required for nucleotide, histidine, and tryptophan biosynthesis; one of five related enzymes, which are active as heteromultimeric complexes; PRS4 has a paralog, PRS2, that arose from the whole genome duplication; a missense mutation in the conserved residue R196 of its human homolog PRPS1 is pathogenic
YBL068W-A	YBL068W-A	2	91794	92030	W							Dubious open reading frame; unlikely to encode a functional protein, based on available experimental and comparative sequence data; identified by fungal homology and RT-PCR
YBL069W	AST1	2	90741	92030	W		5.55144	53.5			Abundance_Low	Lipid raft associated protein; interacts with the plasma membrane ATPase Pma1p and has a role in its targeting to the plasma membrane by influencing its incorporation into lipid rafts; sometimes classified in the medium-chain dehydrogenase/reductases (MDRs) superfamily; AST1 has a paralog, AST2, that arose from the whole genome duplication
YBL070C	YBL070C	2	90605	90925	C							Dubious open reading frame; unlikely to encode a functional protein, based on available experimental and comparative sequence data
YBL071C	YBL071C	2	90223	90531	C							Putative protein of unknown function; conserved among S. cerevisiae strains; YBL071C is not an essential gene
YBL071C-B	YBL071C-B	2	89458	89556	C							Putative protein of unknown function; identified by gene-trapping, microarray-based expression analysis, and genome-wide homology searching
YBL071W-A	KTI11	2	89978	90226	W	DPH3		825.5		429.7		Zn-ribbon protein that co-purifies with Dph1 and Dph2; in a complex required for synthesis of diphthamide on translation factor eEF2 and with Elongator subunits Iki3p, Elp2p, and Elp3p; involved in modification of wobble nucleosides in tRNAs; forms a stable heterodimer with Ats1p
YBL072C	RPS8A	2	88523	89125	C	eS8|ribosomal 40S subunit protein S8A|S8e|rp19|YS9|S8A|S14A	11.5132	6213		4550.1		Protein component of the small (40S) ribosomal subunit; homologous to mammalian ribosomal protein S8, no bacterial homolog; RPS8A has a paralog, RPS8B, that arose from the whole genome duplication
YBL073W	YBL073W	2	87646	87957	W							Dubious open reading frame; unlikely to encode a functional protein, based on available experimental and comparative sequence data; partially overlaps the essential gene AAR2/YBL074C
YBL074C	AAR2	2	86722	87789	C	U5 snRNP complex subunit AAR2	3.84163		Abundance_Low		Abundance_Low	Component of the U5 snRNP complex; required for splicing of U3 precursors; originally described as a splicing factor specifically required for splicing pre-mRNA of the MATa1 cistron
YBL075C	SSA3	2	84499	86448	C	Hsp70 family ATPase SSA3|YG106	4.7403		Abundance_Low		Abundance_Low	ATPase involved in protein folding and the response to stress; plays a role in SRP-dependent cotranslational protein-membrane targeting and translocation; member of the heat shock protein 70 (HSP70) family; localized to the cytoplasm; SSA3 has a paralog, SSA4, that arose from the whole genome duplication
YBL076C	ILS1	2	81043	84261	C	isoleucine--tRNA ligase ILS1	7.80062	3489.5		3530		Cytoplasmic isoleucine-tRNA synthetase; target of the G1-specific inhibitor reveromycin A
YBL077W	YBL077W	2	80897	81328	W							Dubious open reading frame; unlikely to encode a functional protein, based on available experimental and comparative sequence data; partially overlaps the verified gene ILS1/YBL076C
YBL078C	ATG8	2	80378	80731	C	ubiquitin-like protein ATG8|AUT7|CVT5|APG8	6.5288					Component of autophagosomes and Cvt vesicles; regulator of Atg1p, targets it to autophagosomes; binds the Atg1p-Atg13p complex, triggering its vacuolar degradation; unique ubiquitin-like protein whose conjugation target is lipid phosphatidylethanolamine (PE); Atg8p-PE is anchored to membranes, is involved in phagophore expansion, and may mediate membrane fusion during autophagosome formation; dec…
YBL079W	NUP170	2	75259	79767	W	NLE3	5.43823	160.5		109.6		Subunit of inner ring of nuclear pore complex (NPC); contributes to NPC assembly and nucleocytoplasmic transport; interacts with genomic regions that contain ribosomal protein and subtelomeric genes, where it functions in nucleosome positioning and as a repressor of transcription; both Nup170p and NUP157p are similar to human Nup155p; NUP170 has a paralog, NUP157, that arose from the whole genome…
YBL080C	PET112	2	73070	74695	C	glutamyl-tRNA(Gln) amidotransferase subunit PET112	4.25615		Abundance_Low		Abundance_Low	Subunit of the trimeric GatFAB AmidoTransferase(AdT) complex; involved in the formation of Q-tRNAQ; mutation is functionally complemented by the bacterial GatB ortholog
YBL081W	YBL081W	2	71866	72972	W		4.99218					Non-essential protein of unknown function; null mutation results in a decrease in plasma membrane electron transport
YBL082C	ALG3	2	69751	71127	C	dolichyl-P-Man:Man(5)GlcNAc(2)-PP-dolichol alpha-1,3-mannosyltransferase|RHK1	5.55029		Abundance_Low		Abundance_Low	Dolichol-P-Man dependent alpha(1-3) mannosyltransferase; involved in synthesis of dolichol-linked oligosaccharide donor for N-linked glycosylation of proteins; G353A missense mutation in human ortholog ALG3 implicated in carbohydrate deficient glycoprotein syndrome type IV, which is characterized by microcephaly, severe epilepsy, minimal psychomotor development, partial deficiency of sialic acids…
YBL083C	YBL083C	2	69713	70138	C		5.02739					Dubious open reading frame; unlikely to encode a functional protein, based on available experimental and comparative sequence data; overlaps verified ORF ALG3
YBL084C	CDC27	2	67169	69445	C	anaphase promoting complex subunit CDC27|SNB1|APC3	4.37729	50.5			Abundance_Low	Subunit of the Anaphase-Promoting Complex/Cyclosome (APC/C); APC/C is a ubiquitin-protein ligase required for degradation of anaphase inhibitors, including mitotic cyclins, during the metaphase/anaphase transition
YBL085W	BOI1	2	63876	66818	W	BOB1|GIN7	5.50933	77.5		50.5		Protein implicated in polar growth; functionally redundant with Boi2p; interacts with bud-emergence protein Bem1p; contains an SH3 (src homology 3) domain and a PH (pleckstrin homology) domain; relocalizes from bud neck to cytoplasm upon DNA replication stress; BOI1 has a paralog, BOI2, that arose from the whole genome duplication
YBL086C	YBL086C	2	61202	62602	C		4.19972		Abundance_Low	55		Protein of unknown function; green fluorescent protein (GFP)-fusion protein localizes to the cell periphery
YBL087C	RPL23A	2	59822	60739	C	uL14|ribosomal 60S subunit protein L23A|L14|YL32|L23A|L17aA	10.3248	860.5		509.5		Ribosomal 60S subunit protein L23A; homologous to mammalian ribosomal protein L23 and bacterial L14; RPL23A has a paralog, RPL23B, that arose from the whole genome duplication
YBL088C	TEL1	2	51019	59382	C	DNA-binding protein kinase TEL1	3.36162					Protein kinase primarily involved in telomere length regulation; contributes to cell cycle checkpoint control in response to DNA damage; acts with Red1p and Mec1p to promote interhomolog recombination by phosphorylation of Hop1; functionally redundant with Mec1p; regulates P-body formation induced by replication stress; homolog of human ataxia-telangiectasia mutated (ATM) gene
YBL089W	AVT5	2	49574	50953	W	amino acid transporter	4.64224					Putative transporter; member of a family of seven S. cerevisiae genes (AVT1-7) related to vesicular GABA-glycine transporters; AVT5 has a paralog, AVT6, that arose from the whole genome duplication
YBL090W	MRP21	2	48825	49358	W	mitochondrial 37S ribosomal protein MRP21|MRP50	6.32259		Abundance_Low		Abundance_Low	Mitochondrial ribosomal protein of the small subunit; MRP21 exhibits genetic interactions with mutations in the COX2 and COX3 mRNA 5'-untranslated leader sequences
YBL091C	MAP2	2	47363	48628	C	methionine aminopeptidase	7.53256	109		90.5		Methionine aminopeptidase; catalyzes the cotranslational removal of N-terminal methionine from nascent polypeptides; function is partially redundant with that of Map1p
YBL091C-A	SCS22	2	46565	47180	C	phospholipid metabolism-regulating protein SCS22						Protein involved in regulation of phospholipid metabolism; one of 6 proteins (Ist2p, Scs2p, Scs22p, Tcb1p, Tcb2p, Tcb3p) that connect the ER and plasma membrane (PM); regulates PM PI4P levels by controlling access of the Sac1p phosphatase to its substrate, PI4P; human VAP homolog; similar to D. melanogaster inturned protein; SWAT-GFP and mCherry fusion proteins localize to the cytosol; SCS22 has …
YBL092W	RPL32	2	45978	46370	W	eL32|ribosomal 60S subunit protein L32|L32e|L32	11.7255					Ribosomal 60S subunit protein L32; overexpression disrupts telomeric silencing; homologous to mammalian ribosomal protein L32, no bacterial homolog
YBL093C	ROX3	2	44256	44918	C	SSX2|MED19|SSN7|NUT3	6.88917	46.5			Abundance_Low	Subunit of the RNA polymerase II mediator complex; associates with core polymerase subunits to form the RNA polymerase II holoenzyme
YBL094C	YBL094C	2	43765	44097	C							Dubious open reading frame; unlikely to encode a functional protein, based on available experimental and comparative sequence data; partially overlaps uncharacterized ORF YBL095W
YBL095W	MRX3	2	43277	44089	W		6.12451		Abundance_Low		Abundance_Low	Protein that associates with mitochondrial ribosome; likely functions in cristae junction formation; the authentic, non-tagged protein is detected in highly purified mitochondria in high-throughput studies
YBL096C	YBL096C	2	43174	43482	C							Non-essential protein of unknown function
YBL097W	BRN1	2	40831	43095	W	condensin subunit BRN1	3.79357		Abundance_Low		Abundance_Low	Subunit of the condensin complex; required for chromosome condensation and for clustering of tRNA genes at the nucleolus; may influence multiple aspects of chromosome transmission
YBL098W	BNA4	2	39145	40527	W	kynurenine 3-monooxygenase	5.54143		Abundance_Low		Abundance_Low	Kynurenine 3-monooxygenase; required for the de novo biosynthesis of NAD from tryptophan via kynurenine; expression regulated by Hst1p; putative therapeutic target for Huntington disease
YBL099W	ATP1	2	37053	38690	W	F1F0 ATP synthase subunit alpha	8.82399	1465.5		3176.5		Alpha subunit of the F1 sector of mitochondrial F1F0 ATP synthase; which is a large, evolutionarily conserved enzyme complex required for ATP synthesis; F1 translationally regulates ATP6 and ATP8 expression to achieve a balanced output of ATP synthase genes encoded in nucleus and mitochondria; phosphorylated; N-terminally propionylated in vivo
YBL100C	YBL100C	2	36989	37303	C							Dubious open reading frame; unlikely to encode a functional protein, based on available experimental and comparative sequence data; almost completely overlaps the 5' end of ATP1
YBL100W-C	YBL100W-C	2	28427	28546	W	YBL101W-C						Putative protein of unknown function; identified by gene-trapping, microarray-based expression analysis, and genome-wide homology searching
YBL101C	ECM21	2	24946	28299	C	ART2	4.35543	53.5		91		Protein involved in regulating endocytosis of plasma membrane proteins; identified as a substrate for ubiquitination by Rsp5p and deubiquitination by Ubp2p; promoter contains several Gcn4p binding elements; ECM21 has a paralog, CSR2, that arose from the whole genome duplication
YBL102W	SFT2	2	24098	24745	W		6.8876	120		191.5		Tetra-spanning membrane protein found mostly in the late Golgi; non-essential; can suppress some sed5 alleles; may be part of the transport machinery, but precise function is unknown; similar to mammalian syntaxin 5
YBL103C	RTG3	2	22076	23536	C		5.45092		Abundance_Low		Abundance_Low	bHLH/Zip transcription factor for retrograde (RTG) and TOR pathways; forms a complex with another bHLH/Zip protein, Rtg1p, to activate the pathways; target of Hog1p
YBL104C	SEA4	2	18177	21293	C	YBL103C-A	4.72484	71.5		53		Subunit of SEACAT, a subcomplex of the SEA complex; Sea4p, along with Rtc1p and Mtc5p, redundantly inhibit the TORC1 inhibitory role of the Iml1p/SEACIT (Iml1p-Npr2p-Npr3p) subcomplex, a GAP for GTPase Gtr1p (EGOC subunit) in response to amino acid limitation, thereby resulting in activation of TORC1 signaling; SEA is a coatomer-related complex that associates dynamically with the vacuole; contai…
YBL105C	PKC1	2	14241	17696	C	protein kinase C|CLY7|CLY5|STT1|HPO2|CLY15	5.36467	123		122		Protein serine/threonine kinase; essential for cell wall remodeling during growth; localized to sites of polarized growth and the mother-daughter bud neck; homolog of the alpha, beta, and gamma isoforms of mammalian protein kinase C (PKC)
YBL106C	SRO77	2	10847	13879	C	putative Rab GTPase-binding protein SRO77|SNI2|SOP2	3.84449					Protein with roles in exocytosis and cation homeostasis; functions in docking and fusion of post-Golgi vesicles with plasma membrane; regulates cell proliferation and colony development via the Rho1-Tor1 pathway; interacts with SNARE protein Sec9p; homolog of Drosophila lethal giant larvae tumor suppressor; SRO77 has a paralog, SRO7, that arose from the whole genome duplication
YBL107C	MIX23	2	9961	10551	C	MIC23	6.33888		Abundance_Low		Abundance_Low	Mitochondrial intermembrane space protein of unknown function; imported via the MIA import machinery; contains an unusual twin cysteine motif (CX13C CX14C)
YBL107W-A	YBL107W-A	2	9268	9372	W							Dubious open reading frame; unlikely to encode a functional protein, based on available experimental and comparative sequence data; completely overlaps the Ty2 LTR YBLWdelta2; YBL107W-A has a paralog, YER138W-A, that arose from a single-locus duplication
YBL108C-A	PAU9	2	7605	7733	C	seripauperin PAU9						Protein of unknown function; member of the seripauperin multigene family encoded mainly in subtelomeric regions; SWAT-GFP and mCherry fusion proteins localize to the endoplasmic reticulum and vacuole respectively
YBL108W	YBL108W	2	8177	8482	W							Dubious open reading frame; unlikely to encode a functional protein, based on available experimental and comparative sequence data
YBL109W	YBL109W	2	5790	6125	W							Dubious open reading frame; unlikely to encode a functional protein, based on available experimental and comparative sequence data
YBL111C	YBL111C	2	2907	5009	C				Abundance_Low	173.5		Helicase-like protein encoded within the telomeric Y' element; relocalizes from mitochondrion to cytoplasm upon DNA replication stress
YBL112C	YBL112C	2	2582	2899	C		1.2174					Putative protein of unknown function; YBL112C is contained within TEL02L
YBL113C	YBL113C	2	280	2658	C		3.59702					Helicase-like protein encoded within the telomeric Y' element
YBL113W-A	YBL113W-A	2	646	1128	W							Dubious open reading frame; unlikely to encode a functional protein, based on available experimental and comparative sequence data; identified by gene-trapping, microarray-based expression analysis, and genome-wide homology searching
YBR001C	NTH2	2	238941	241283	C	alpha,alpha-trehalase NTH2	4.42335		Abundance_Low		Abundance_Low	Putative neutral trehalase, required for thermotolerance; may mediate resistance to other cellular stresses; NTH2 has a paralog, NTH1, that arose from the whole genome duplication
YBR002C	RER2	2	241708	242568	C	ditrans,polycis-polyprenyl diphosphate synthase	6.35358	353.5		356.5		Forms the dehydrodolichyl diphosphate syntase (DDS) complex with NUS1; major enzyme of polyprenol synthesis in both the endoplasmic reticulum (ER) and in lipid droplets; participates in ER protein sorting; human ortholog DHDDS functionally complements the heat sensitive growth defect of a ts allele, and is associated with retinitis pigmentosa
YBR003W	COQ1	2	242809	244230	W	trans-hexaprenyltranstransferase	5.76314	89		131		Hexaprenyl pyrophosphate synthetase; catalyzes the first step in ubiquinone (coenzyme Q) biosynthesis
YBR004C	GPI18	2	244366	245667	C	GPI-anchor transamidase GPI18|FMP44	4.88621					Functional ortholog of human PIG-V; PIG-V is a mannosyltransferase that transfers the second mannose in glycosylphosphatidylinositol biosynthesis; the authentic, non-tagged protein was localized to mitochondria
YBR005W	RCR1	2	245906	246547	W	SSH6	5.68859	55.5			Abundance_Low	Protein of the ER membrane involved in cell wall chitin deposition; may function in the endosomal-vacuolar trafficking pathway, helping determine whether plasma membrane proteins are degraded or routed to the plasma membrane; RCR1 has a paralog, RCR2, that arose from the whole genome duplication
YBR006W	UGA2	2	247010	248503	W	succinate-semialdehyde dehydrogenase (NAD(P)(+))|UGA5	5.77738		Abundance_Low		Abundance_Low	Succinate semialdehyde dehydrogenase; involved in the utilization of gamma-aminobutyrate (GABA) as a nitrogen source; part of the 4-aminobutyrate and glutamate degradation pathways; localized to the cytoplasm
YBR007C	DSF2	2	248806	251016	C		5.15544		Abundance_Low		Abundance_Low	Deletion suppressor of mpt5 mutation; relocalizes from bud neck to cytoplasm upon DNA replication stress
YBR008C	FLR1	2	252563	254209	C		4.62081		Abundance_Low		Abundance_Low	Plasma membrane transporter of the major facilitator superfamily; member of the 12-spanner drug:H(+) antiporter DHA1 family; involved in efflux of fluconazole, diazaborine, benomyl, methotrexate, and other drugs; expression induced in cells treated with the mycotoxin patulin; relocalizes from nucleus to plasma membrane upon DNA replication stress
YBR009C	HHF1	2	255373	255684	C	histone H4	11.0306	2027		2364		Histone H4; core histone protein required for chromatin assembly and chromosome function; one of two identical histone proteins (see also HHF2); contributes to telomeric silencing; N-terminal domain involved in maintaining genomic integrity
YBR010W	HHT1	2	256331	256741	W	histone H3|SIN2|BUR5	10.3697		Abundance_Low		Abundance_Low	Histone H3; core histone protein required for chromatin assembly, part of heterochromatin-mediated telomeric and HM silencing; one of two identical histone H3 proteins (see HHT2); regulated by acetylation, methylation, and phosphorylation; H3K14 acetylation plays an important role in the unfolding of strongly positioned nucleosomes during repair of UV damage
YBR011C	IPP1	2	257112	257975	C	inorganic diphosphatase IPP1|PPA1	10.7514	1221		993		Cytoplasmic inorganic pyrophosphatase (PPase); homodimer that catalyzes the rapid exchange of oxygens from Pi with water, highly expressed and essential for viability, active-site residues show identity to those from E. coli PPase
YBR012C	YBR012C	2	259147	259566	C		4.07786					Dubious open reading frame; unlikely to encode a functional protein, based on available experimental and comparative sequence data; expression induced by iron-regulated transcriptional activator Aft2p
YBR013C	YBR013C	2	265492	265881	C		4.60796					Putative protein of unknown function; haploid deletion mutant exhibits synthetic phenotype with alpha-synuclein; SWAT-GFP fusion protein localizes to the endoplasmic reticulum while mCherry fusion protein localizes to both the endoplasmic reticulum and vacuole
YBR014C	GRX7	2	266725	267336	C	glutathione-disulfide reductase GRX7	7.06448		Abundance_Low		Abundance_Low	Cis-golgi localized monothiol glutaredoxin; more similar in activity to dithiol than other monothiol glutaredoxins; involved in the oxidative stress response; does not bind metal ions; GRX7 has a paralog, GRX6, that arose from the whole genome duplication
YBR015C	MNN2	2	267710	269503	C	alpha-1,2-mannosyltransferase MNN2|LDB8|CRV4|TTP1	6.8811	129.5		68.5		Alpha-1,2-mannosyltransferase; responsible for addition of the first alpha-1,2-linked mannose to form the branches on the mannan backbone of oligosaccharides, localizes to an early Golgi compartment
YBR016W	YBR016W	2	270247	270633	W		7.47583	68.5		81.4		Tail-anchored plasma membrane protein with a conserved CYSTM module; predicted to be palmitoylated; has similarity to hydrophilins, which are involved in the adaptive response to hyperosmotic conditions; YBR016W has a paralog, YDL012C, that arose from the whole genome duplication
YBR017C	KAP104	2	270947	273703	C		5.73435	277		158.5		Transportin or cytosolic karyopherin beta 2; functions in the rg-nuclear localization signal-mediated nuclear import/reimport of mRNA-binding proteins Nab2p and Hrp1p; regulates asymmetric protein synthesis in daughter cells during mitosis
YBR018C	GAL7	2	274427	275527	C	UDP-glucose:hexose-1-phosphate uridylyltransferase						Galactose-1-phosphate uridyl transferase; synthesizes glucose-1-phosphate and UDP-galactose from UDP-D-glucose and alpha-D-galactose-1-phosphate in the second step of galactose catabolism; human homolog UGP2 can complement yeast null mutant
YBR019C	GAL10	2	276253	278352	C	bifunctional UDP-glucose 4-epimerase/aldose 1-epimerase						UDP-glucose-4-epimerase; catalyzes interconversion of UDP-galactose and UDP-D-glucose in galactose metabolism; also catalyzes conversion of alpha-D-glucose or alpha-D-galactose to their beta-anomers; human homolog GALE implicated in galactosemia, can complement yeast null mutant
YBR020W	GAL1	2	279021	280607	W	galactokinase	2.32732					Galactokinase; phosphorylates alpha-D-galactose to alpha-D-galactose-1-phosphate in the first step of galactose catabolism; expression regulated by Gal4p; human homolog GALK2 complements yeast null mutant; GAL1 has a paralog, GAL3, that arose from the whole genome duplication
YBR021W	FUR4	2	281443	283344	W	uracil permease	4.90428					Plasma membrane localized uracil permease; expression is tightly regulated by uracil levels and environmental cues; conformational alterations induced by unfolding or substrate binding result in Rsp5p-mediated ubiquitination and degradation
YBR022W	POA1	2	283738	284271	W	ADP-ribose 1''-phosphate phosphatase	5.59251					Phosphatase that is highly specific for ADP-ribose 1''-phosphate; a tRNA splicing metabolite; may have a role in regulation of tRNA splicing
YBR023C	CHS3	2	284428	287925	C	chitin synthase CHS3|KTI2|DIT101|CSD2|CAL1	5.42057	201.5		78.3		Chitin synthase III; catalyzes the transfer of N-acetylglucosamine (GlcNAc) to chitin; required for synthesis of the majority of cell wall chitin, the chitin ring during bud emergence, and spore wall chitosan; contains overlapping di-leucine and di-acidic signals that mediate, respectively, intracellular trafficking by AP-1 and trafficking to plasma membrane by exomer complex; requires AP-3 compl…
YBR024W	SCO2	2	289445	290350	W	putative thioredoxin peroxidase SCO2	5.22352					Protein anchored to mitochondrial inner membrane; may have a redundant function with Sco1p in delivery of copper to cytochrome c oxidase; interacts with Cox2p; SCO2 has a paralog, SCO1, that arose from the whole genome duplication
YBR025C	OLA1	2	290681	291865	C	Obg-like ATPase	8.88303	2822		1875		P-loop ATPase with similarity to human OLA1 and bacterial YchF; identified as specifically interacting with the proteasome; null mutant displays increased translation rate and increased readthrough of premature stop codons; protein abundance increases in response to hydrogen peroxide and to DNA replication stress
YBR026C	ETR1	2	292877	294019	C	MRF1'|MRF1	7.00656		Abundance_Low		Abundance_Low	2-enoyl thioester reductase; member of the medium chain dehydrogenase/reductase family; localized to mitochondria, where it has a probable role in fatty acid synthesis; human MECR functionally complements the respiratory growth defect of the null mutant
YBR027C	YBR027C	2	294024	294356	C							Putative protein of unknown function; conserved among S. cerevisiae strains; YBR027C is not an essential gene
YBR028C	YPK3	2	294425	296002	C	putative protein kinase YPK3	5.55652	187		186.5		AGC kinase; phosphorylated by cAMP-dependent protein kinase (PKA) in a TORC1-dependent manner; directly phosphorylated by TORC1; phosphorylates ribosomal protein Rps6a/b (S6), in a TORC-dependent manner; undergoes autophosphorylation
YBR029C	CDS1	2	296369	297742	C	phosphatidate cytidylyltransferase|CDG1	7.95656					Phosphatidate cytidylyltransferase (CDP-diglyceride synthetase); an enzyme that catalyzes that conversion of CTP + phosphate into diphosphate + CDP-diaclglyerol, a critical step in the synthesis of all major yeast phospholipids; human homolog CDS1 can complement yeast cds1 null mutant
YBR030W	RKM3	2	298292	299950	W	protein-lysine N-methyltransferase	5.90904		Abundance_Low		Failed_QC/Abundance_Low	Ribosomal lysine methyltransferase; specific for monomethylation of Rpl42ap and Rpl42bp (lysine 40); nuclear SET domain containing protein; relocalizes to the cytosol in response to hypoxia
YBR031W	RPL4A	2	300166	301254	W	uL4|ribosomal 60S subunit protein L4A|L4|rp2|YL2|L4A|L2A	10.2829		Abundance_Low		Abundance_Low	Ribosomal 60S subunit protein L4A; N-terminally acetylated; homologous to mammalian ribosomal protein L4 and bacterial L4; RPL4A has a paralog, RPL4B, that arose from the whole genome duplication
YBR032W	YBR032W	2	301519	301821	W							Putative protein of unknown function; conserved among S. cerevisiae strains; YBR032W is not an essential gene
YBR033W	EDS1	2	301944	304703	W		2.22274					Putative zinc cluster protein, predicted to be a transcription factor; not an essential gene; EDS1 has a paralog, RGT1, that arose from the whole genome duplication
YBR034C	HMT1	2	304930	305976	C	protein-arginine omega-N methyltransferase HMT1|RMT1|ODP1|HCP1	7.50774	539		296.5		Nuclear SAM-dependent mono- and asymmetric methyltransferase; modifies hnRNPs, including Npl3p and Hrp1p, affecting their activity and nuclear export; methylates U1 snRNP protein Snp1p, ribosomal protein Rps2p, and histones H3 and H4; interacts genetically with genes encoding components of Rpd3(L) and this interaction is important for Rpd3 recruitment to the subtelomeric region
YBR035C	PDX3	2	306269	306955	C	pyridoxamine-phosphate oxidase PDX3	7.81257					Pyridoxine (pyridoxamine) phosphate oxidase; has homologs in E. coli and Myxococcus xanthus; transcription is under the general control of nitrogen metabolism
YBR036C	CSG2	2	309081	310313	C	mannosylinositol phosphorylceramide synthase regulatory subunit|CLS2	7.36146	462		317		Endoplasmic reticulum membrane protein; required for mannosylation of inositolphosphorylceramide and for growth at high calcium concentrations; protein abundance increases in response to DNA replication stress
YBR037C	SCO1	2	310565	311452	C	Cu-binding protein SCO1|PET161	5.19859		Abundance_Low	71.5		Copper-binding protein of mitochondrial inner membrane; required for cytochrome c oxidase activity and respiration; may function to deliver copper to cytochrome c oxidase; similar to thioredoxins; SCO1 has a paralog, SCO2, that arose from the whole genome duplication
YBR038W	CHS2	2	311898	314789	W	chitin synthase CHS2	4.78192					Chitin synthase II; catalyzes transfer of N-acetylglucosamine (GlcNAc) to chitin upon activation of zymogenic form; required for chitin synthesis in the primary septum during cytokinesis; localization regulated by Cdk1p during mitosis; phosphorylation by Dbf2p kinase regulates its dynamics and chitin synthesis during cytokinesis
YBR039W	ATP3	2	315575	316510	W	F1F0 ATP synthase subunit gamma	8.87221	939		1613.5		Gamma subunit of the F1 sector of mitochondrial F1F0 ATP synthase; F1F0 ATP synthase is a large, evolutionarily conserved enzyme complex required for ATP synthesis
YBR040W	FIG1	2	316968	317864	W							Integral membrane protein required for efficient mating; may participate in or regulate the low affinity Ca2+ influx system, which affects intracellular signaling and cell-cell fusion during mating
YBR041W	FAT1	2	318266	320275	W	long-chain fatty acid transporter FAT1	5.6837		Abundance_Low		Abundance_Low	Very long chain fatty acyl-CoA synthetase and fatty acid transporter; activates imported fatty acids with a preference for very long lengths (C20-C26); has a separate function in the transport of long chain fatty acids
YBR042C	CST26	2	320416	321609	C	putative acyltransferase|PSI1	5.41065		Abundance_Low		Abundance_Low	Acyltransferase; enzyme mainly responsible for the introduction of saturated very long chain fatty acids into neo-synthesized molecules of phosphatidylinositol; required for incorporation of stearic acid into phosphatidylinositol; affects chromosome stability when overexpressed; CST26 has a paralog, YDR018C, that arose from the whole genome duplication
YBR043C	QDR3	2	321876	323945	C	AQR2	5.39291		Abundance_Low	103.5		Multidrug transporter of the major facilitator superfamily; member of the 12-spanner drug:H(+) antiporter DHA1 family; has a role in polyamine homeostasis; involved in spore wall asembly; sequence similarity to DTR1 and QDR1, and the triple mutant dtr1 qdr1 qdr3 exhibits reduced dityrosine fluorescence relative to the single mutants; expression is upregulated under polyamine stress; required for …
YBR044C	TCM62	2	324341	326059	C		5.06724					Protein involved in assembly of the succinate dehydrogenase complex; mitochondrial; putative chaperone
YBR045C	GIP1	2	328173	330092	C	protein phosphatase regulator GIP1	2.60908					Meiosis-specific regulatory subunit of the Glc7p protein phosphatase; regulates spore wall formation and septin organization, required for expression of some late meiotic genes and for normal localization of Glc7p
YBR046C	ZTA1	2	330507	331511	C	NADPH:quinone reductase	4.96179	106		158		NADPH-dependent quinone reductase; GFP-tagged protein localizes to the cytoplasm and nucleus; has similarity to E. coli quinone oxidoreductase and to human zeta-crystallin
YBR047W	FMP23	2	331833	332360	W		4.21799		Abundance_Low		Abundance_Low	Putative protein of unknown function; proposed to be involved in iron or copper homeostasis; the authentic, non-tagged protein is detected in highly purified mitochondria in high-throughput studies
YBR048W	RPS11B	2	332831	333812	W	uS17|ribosomal 40S subunit protein S11B|S17|rp41B|YS12|S18B|S11B	10.6945		Abundance_Low		Abundance_Low	Protein component of the small (40S) ribosomal subunit; homologous to mammalian ribosomal protein S11 and bacterial S17; RPS11B has a paralog, RPS11A, that arose from the whole genome duplication
YBR049C	REB1	2	334386	336818	C	DNA-binding protein REB1|GRF2	5.79862	510.5		466		RNA polymerase I enhancer binding protein; DNA binding protein that binds to genes transcribed by both RNA polymerase I and RNA polymerase II; required for termination of RNA polymerase I transcription; Reb1p bound to DNA acts to block RNA polymerase II readthrough transcription
YBR050C	REG2	2	337183	338199	C	protein phosphatase regulator REG2	1.74363					Regulatory subunit of the Glc7p type-1 protein phosphatase; involved with Reg1p, Glc7p, and Snf1p in regulation of glucose-repressible genes, also involved in glucose-induced proteolysis of maltose permease; REG2 has a paralog, REG1, that arose from the whole genome duplication
YBR051W	YBR051W	2	337988	338338	W							Dubious open reading frame; unlikely to encode a functional protein, based on available experimental and comparative sequence data; partially overlaps the REG2/YBR050C regulatory subunit of the Glc7p type-1 protein phosphatase
YBR052C	RFS1	2	338720	339352	C	flavodoxin-like fold family protein	8.22239	379.5		444		Protein of unknown function; member of a flavodoxin-like fold protein family that includes Pst2p and Ycp4p; green fluorescent protein (GFP)-fusion protein localizes to the cytoplasm in a punctate pattern; RFS1 has a paralog, PST2, that arose from the whole genome duplication
YBR053C	YBR053C	2	339675	340751	C		6.66371					Putative protein of unknown function; induced by cell wall perturbation
YBR054W	YRO2	2	343101	344135	W		7.64474	431.5		707.5		Protein with a putative role in response to acid stress; null mutant is sensitive to acetic acid; transcription is regulated by Haa1p and induced in the presence of acetic acid; protein observed in plasma membrane foci in the presence of acetic acid; the authentic, non-tagged protein is detected in a phosphorylated state in highly purified mitochondria in high-throughput studies
YBR055C	PRP6	2	344602	347301	C	U4/U6-U5 snRNP complex subunit PRP6|TSM7269|RNA6	4.97855		Abundance_Low		Abundance_Low	Splicing factor; component of the U4/U6-U5 snRNP complex
YBR056C-B	YBR056C-B	2	351293	351451	C							Dubious open reading frame; unlikely to encode a functional protein, based on available experimental and comparative sequence data; almost completely overlaps the dubious ORF YBR056W-A
YBR056W	YBR056W	2	347879	349384	W	17-beta-hydroxysteroid dehydrogenase-like protein	6.70461		Abundance_Low		Abundance_Low	Putative glycoside hydrolase of the mitochondrial intermembrane space
YBR056W-A	YBR056W-A	2	351255	351455	W							Protein of unknown function; mRNA identified as translated by ribosome profiling data; partially overlaps dubious ORF YBR056C-B; YBR056W-A has a paralog, YDR034W-B, that arose from the whole genome duplication
YBR057C	MUM2	2	352193	353293	C	SPOT8	5.9948		Abundance_Low		Abundance_Low	Protein essential for meiotic DNA replication and sporulation; cytoplasmic protein; subunit of the MIS complex which controls mRNA methylation during during the induction of sporulation; also interacts with Orc2p, which is a component of the origin recognition complex
YBR058C	UBP14	2	353672	356017	C	ubiquitin-specific protease UBP14|GID6	5.49365		Abundance_Low		Abundance_Low	Ubiquitin-specific protease; specifically disassembles unanchored ubiquitin chains; involved in fructose-1,6-bisphosphatase (Fbp1p) degradation; similar to human isopeptidase T
YBR058C-A	TSC3	2	356324	356566	C			147		176		Protein that stimulates the activity of serine palmitoyltransferase; involved in sphingolipid biosynthesis; Lcb1p and Lcb2p are the two components of serine palmitoyltransferase
YBR059C	AKL1	2	356861	360187	C	serine/threonine protein kinase AKL1	5.32136	155		176.5		Ser-Thr protein kinase; member (with Ark1p and Prk1p) of the Ark kinase family; involved in endocytosis and actin cytoskeleton organization
YBR060C	ORC2	2	360652	362514	C	origin recognition complex subunit 2|SIR5|RRR1	5.29712		Abundance_Low		Abundance_Low	Subunit of the origin recognition complex (ORC); ORC directs DNA replication by binding to replication origins and is also involved in transcriptional silencing; interacts with Spp1p and with trimethylated histone H3; phosphorylated by Cdc28p
YBR061C	TRM7	2	364787	365719	C	tRNA methyltransferase TRM7	6.33991	111.5			Abundance_Low	2'-O-ribose methyltransferase; methylates the 2'-O-ribose of tRNA-Phe, tRNA-Trp, and tRNA-Leu at positions C32 and N34 of tRNA anticodon loop; crucial biological role likely modification of tRNA-Phe; interacts with Trm732p and Rtt10p in 2'-O-methylation of C32 and N34 substrate tRNAs, respectively; yeast null mutant can be functionally complemented by human FTSJ1, mutations in which have been imp…
YBR062C	YBR062C	2	365976	366600	C		6.1634					Protein of unknown function that interacts with Msb2p; may play a role in activation of the filamentous growth pathway
YBR063C	YBR063C	2	366970	368184	C		4.85879					Putative protein of unknown function; YBR063C is not an essential gene
YBR064W	YBR064W	2	367763	368191	W							Dubious open reading frame; unlikely to encode a functional protein, based on available experimental and comparative sequence data; partially overlaps the uncharacterized ORF YBR063C
YBR065C	ECM2	2	368584	369678	C	SLT11	4.75766		Abundance_Low		Abundance_Low	Pre-mRNA splicing factor; facilitates the cooperative formation of U2/U6 helix II in association with stem II in the spliceosome, function may be regulated by Slu7p
YBR066C	NRG2	2	370037	370699	C		5.82599		Abundance_Low		Abundance_Low	Transcriptional repressor; mediates glucose repression and negatively regulates filamentous growth; activated in stochastic pulses of nuclear localization in response to low glucose
YBR067C	TIP1	2	372103	372735	C	putative lipase	7.44829	840		614		Major cell wall mannoprotein with possible lipase activity; transcription is induced by heat- and cold-shock; member of the Srp1p/Tip1p family of serine-alanine-rich proteins
YBR068C	BAP2	2	373861	375690	C	branched-chain amino acid permease BAP2	2.852	2228		2764.5		High-affinity leucine permease; functions as a branched-chain amino acid permease involved in uptake of leucine, isoleucine and valine; contains 12 predicted transmembrane domains; BAP2 has a paralog, BAP3, that arose from the whole genome duplication
YBR069C	TAT1	2	376574	378433	C	amino acid transporter TAT1|VAP1|TAP1	1.31497	982.5		674		Amino acid transporter for valine, leucine, isoleucine, and tyrosine; low-affinity tryptophan and histidine transporter; overexpression confers FK506 and FTY720 resistance; protein abundance increases in response to DNA replication stress
YBR070C	ALG14	2	379221	379934	C	N-acetylglucosaminyldiphosphodolichol N-acetylglucosaminyltransferase anchoring subunit ALG14	5.7325	142.5			Abundance_Low	Component of UDP-GlcNAc transferase; required for second step of dolichyl-linked oligosaccharide synthesis; anchors catalytic subunit Alg13p to ER membrane; similar to bacterial and human glycosyltransferases; both human homologs ALG13 and ALG14 are required to complement yeast alg14 mutant
YBR071W	YBR071W	2	380411	381046	W		7.14474		Abundance_Low		Abundance_Low	Protein of unknown function found in the cytoplasm and bud neck; mRNA expression may be regulated by the cell cycle and/or cell wall stress; overexpression of YBR071W affects endocytic protein trafficking
YBR072C-A	YBR072C-A	2	382860	383021	C							Putative protein of unknown function; identified by fungal homology and RT-PCR
YBR072W	HSP26	2	382030	382674	W	chaperone protein HSP26	8.85023	65			Failed_QC	Small heat shock protein (sHSP) with chaperone activity; forms hollow, sphere-shaped oligomers that suppress unfolded proteins aggregation; long-lived protein that is preferentially retained in mother cells and forms cytoplasmic foci; oligomer activation requires heat-induced conformational change; also has mRNA binding activity
YBR073W	RDH54	2	383112	385988	W	DNA-dependent ATPase RDH54|TID1	5.97123	57			Abundance_Low	DNA-dependent ATPase; DNA recombination/repair translocase, supercoils DNA and promotes DNA strand opening; stimulates strand exchange by modifying dsDNA topology; involved in recombinational repair of DNA double-strand breaks (DSBs) during mitosis and meiosis; phosphorylated in Mec1p-, Rad53p-dependent way in response to one DSB; contributes to remodelling of nucleosomes; proposed to be involved…
YBR074W	PFF1	2	386286	389216	W	YBR075W	5.42655					Multi-spanning vacuolar membrane protease; glycosylated transmembrane protein bearing homology to the M28 family of metalloproteases; has a lumenal-facing protease domain; proposed role in vacuole physiology
YBR076C-A	YBR076C-A	2	391351	391617	C							Dubious open reading frame; unlikely to encode a functional protein, based on available experimental and comparative sequence data; partially overlaps verified gene ECM8; identified by fungal homology and RT-PCR
YBR076W	ECM8	2	390227	391291	W							Non-essential protein of unknown function
YBR077C	SLM4	2	391805	392293	C	GSE1|NIR1|EGO3	6.22599	201.5		183.5		Component of the EGO and GSE complexes; essential for integrity and function of EGO; EGO is involved in the regulation of microautophagy and GSE is required for proper sorting of amino acid permease Gap1p; gene exhibits synthetic genetic interaction with MSS4
YBR078W	ECM33	2	393123	394742	W		9.99974					GPI-anchored protein of unknown function; possible role in apical bud growth; GPI-anchoring on the plasma membrane crucial to function; phosphorylated in mitochondria; similar to Sps2p; ECM33 has a paralog, PST1, that arose from the whole genome duplication
YBR079C	RPG1	2	395383	398277	C	translation initiation factor eIF3 core subunit a|TIF32	7.22402	2727		1756.5		eIF3a subunit of the eukaryotic translation initiation factor 3 (eIF3); subunit of the core complex of eIF3; essential for translation; part of a Prt1p-Rpg1p-Nip1p subcomplex that stimulates binding of mRNA and tRNA(i)Met to ribosomes; involved in translation reinitiation; eIF3 is also involved in programmed stop codon readthrough
YBR080C	SEC18	2	398614	400890	C	AAA family ATPase SEC18|ANU4	6.06888	354		314.7		AAA ATPase and SNARE disassembly chaperone; required for vesicular transport between ER and Golgi, the 'priming' step in homotypic vacuole fusion, autophagy, and protein secretion; releases Sec17p from SNAP complexes; has similarity to mammalian N-ethylmaleimide-sensitive factor (NSF)
YBR081C	SPT7	2	401253	405251	C	SAGA histone acetyltransferase complex subunit SPT7|GIT2	4.87567	69		60		Subunit of the SAGA transcriptional regulatory complex; involved in proper assembly of the complex; also present as a C-terminally truncated form in the SLIK/SALSA transcriptional regulatory complex
YBR082C	UBC4	2	406628	407169	C	E2 ubiquitin-conjugating protein UBC4	9.70101	1108.5		652.2		Ubiquitin-conjugating enzyme (E2); key E2 partner with Ubc1p for the anaphase-promoting complex (APC); mediates degradation of abnormal or excess proteins, including calmodulin and histone H3; regulates levels of DNA Polymerase-{alpha} to promote efficient and accurate DNA replication; interacts with many SCF ubiquitin protein ligases; component of the cellular stress response; UBC4 has a paralog…
YBR083W	TEC1	2	409169	410629	W	ROC1	6.37522		Abundance_Low		Abundance_Low	Transcription factor targeting filamentation genes and Ty1 expression; Ste12p activation of most filamentation gene promoters depends on Tec1p and Tec1p transcriptional activity is dependent on its association with Ste12p; binds to TCS elements upstream of filamentation genes, which are regulated by Tec1p/Ste12p/Dig1p complex; competes with Dig2p for binding to Ste12p/Dig1p; positive regulator of…
YBR084C-A	RPL19A	2	414186	415261	C	eL19|ribosomal 60S subunit protein L19A|L19e|rpl5L|YL14|L23A|L19A		2554		1836.5		Ribosomal 60S subunit protein L19A; rpl19a and rpl19b single null mutations result in slow growth, while the double null mutation is lethal; homologous to mammalian ribosomal protein L19, no bacterial homolog; RPL19A has a paralog, RPL19B, that arose from the whole genome duplication
YBR084W	MIS1	2	411054	413981	W	trifunctional formate-tetrahydrofolate ligase/methenyltetrahydrofolate cyclohydrolase/methylenetetrahydrofolate dehydrogenase MIS1	6.6409	235.5		198.5		Mitochondrial C1-tetrahydrofolate synthase; involved in interconversion between different oxidation states of tetrahydrofolate (THF); provides activities of formyl-THF synthetase, methenyl-THF cyclohydrolase, and methylene-THF dehydrogenase
YBR085C-A	YBR085C-A	2	418907	419164	C			593		888.9		Protein of unknown function; green fluorescent protein (GFP)-fusion protein localizes to the cytoplasm and to the nucleus; protein abundance increases in response to DNA replication stress
YBR085W	AAC3	2	415983	416906	W	ADP/ATP carrier protein AAC3|ANC3	1.8986		Abundance_Low		Abundance_Low	Mitochondrial inner membrane ADP/ATP translocator; exchanges cytosolic ADP for mitochondrially synthesized ATP; expressed under anaerobic conditions; similar to Aac1p; has roles in maintenance of viability and in respiration; AAC3 has a paralog, PET9, that arose from the whole genome duplication
YBR086C	IST2	2	420201	423041	C		6.62939	146.5		167.1		Cortical ER protein involved in ER-plasma membrane tethering; one of 6 proteins (Ist2p, Scs2p, Scs22p, Tcb1p, Tcb2p, Tcb3p) that connect ER to the plasma membrane (PM) and regulate PM phosphatidylinositol-4-phosphate (PI4P) levels by controlling access of Sac1p phosphatase to its substrate PI4P in the PM; localizes to the mother cell in small-budded cells and to the bud in medium- and large-budde…
YBR087W	RFC5	2	423765	424829	W	replication factor C subunit 5	5.95772	85.5			Abundance_Low	Subunit of heteropentameric Replication factor C (RF-C); RF-C is a DNA binding protein and ATPase that acts as a clamp loader of the proliferating cell nuclear antigen (PCNA) processivity factor for DNA polymerases delta and epsilon
YBR088C	POL30	2	424990	425766	C	proliferating cell nuclear antigen|PCNA	7.94867		Failed_QC		Failed_QC	Proliferating cell nuclear antigen (PCNA); functions as the sliding replication clamp for DNA polymerase delta; may function as a docking site for other proteins required for mitotic and meiotic chromosomal DNA replication and for DNA repair; PCNA ubiquitination at K164 plays a crucial role during Okazaki fragment processing
YBR089C-A	NHP6B	2	426190	426489	C	high-mobility group nucleosome-binding protein|YBR090C-A		468.5		495.9		High-mobility group (HMG) protein; binds to and remodels nucleosomes; involved in recruiting FACT and other chromatin remodelling complexes to the chromosomes; functionally redundant with Nhp6Ap; required for transcriptional initiation fidelity of some tRNA genes; homologous to mammalian HMGB1 and HMGB2; NHP6B has a paralog, NHP6A, that arose from the whole genome duplication
YBR089W	YBR089W	2	425183	425782	W							Dubious open reading frame; unlikely to encode a functional protein, based on available experimental and comparative sequence data; almost completely overlaps the verified gene POL30
YBR090C	YBR090C	2	426333	427058	C		7.37956	797		871.5		Putative protein of unknown function; green fluorescent protein (GFP)-fusion protein localizes to the cytoplasm and nucleus
YBR091C	TIM12	2	427155	427484	C	MRS5	5.83019					Essential protein of the inner mitochondrial membrane; peripherally localized; component of the TIM22 complex, which is a twin-pore translocase that mediates insertion of numerous multispanning inner membrane proteins
YBR092C	PHO3	2	427698	429101	C	acid phosphatase PHO3|phoC	5.02959	88.5			Abundance_Low	Constitutively expressed acid phosphatase similar to Pho5p; brought to the cell surface by transport vesicles; hydrolyzes thiamin phosphates in the periplasmic space, increasing cellular thiamin uptake; expression is repressed by thiamin
YBR093C	PHO5	2	429548	430951	C	acid phosphatase PHO5|phoE	4.50178		Abundance_Low		Abundance_Low	Repressible acid phosphatase; 1 of 3 repressible acid phosphatases that also mediates extracellular nucleotide-derived phosphate hydrolysis; secretory pathway derived cell surface glycoprotein; induced by phosphate starvation and coordinately regulated by PHO4 and PHO2
YBR094W	PBY1	2	432036	434297	W	putative tubulin tyrosine ligase	4.96009	53		86.5		Putative tubulin tyrosine ligase associated with P-bodies; may have a role in mRNA metabolism; yeast knockout collection strain identified as a pby1 null mutant is actually wild-type for PBY1 and deleted for mms4
YBR095C	RXT2	2	434406	435698	C	RAF60	5.82861	66.5			Abundance_Low	Component of the histone deacetylase Rpd3L complex; possibly involved in cell fusion and invasive growth; relocalizes to the cytosol in response to hypoxia
YBR096W	YBR096W	2	436021	436713	W		7.06548		Abundance_Low		Abundance_Low	Putative protein of unknown function; green fluorescent protein (GFP)-fusion protein localizes to the ER
YBR097W	VPS15	2	436951	441315	W	ubiquitin-binding serine/threonine protein kinase VPS15|VPT15|VPS40|VPL19|VAC4|GRD8	3.13104		Abundance_Low		Abundance_Low	Serine/threonine protein kinase involved in vacuolar protein sorting; functions as a membrane-associated complex with Vps34p; active form recruits Vps34p to the Golgi membrane; interacts with the GDP-bound form of Gpa1p; myristoylated; a fraction is localized, with Vps34p, to nuclear pores at nucleus-vacuole junctions and may facilitate transcription elongation for genes positioned at the nuclear…
YBR098W	MMS4	2	441515	443590	W	YBR100W|SLX2	3.76312		Abundance_Low
YBR099C	YBR099C	2	442924	443307	C		1.70299					Dubious open reading frame; unlikely to encode a functional protein, based on available experimental and comparative sequence data; completely overlaps the verified gene MMS4
YBR101C	FES1	2	443821	444693	C		6.80569	824		362		Hsp70 (Ssa1p) nucleotide exchange factor; required for the release of misfolded proteins from the Hsp70 system to the Ub-proteasome machinery for destruction; cytosolic homolog of Sil1p, which is the nucleotide exchange factor for BiP (Kar2p) in the endoplasmic reticulum; protein abundance increases in response to DNA replication stress
YBR102C	EXO84	2	445062	447323	C	exocyst subunit EXO84|USA3	5.05799	68		70		Exocyst subunit with dual roles in exocytosis and spliceosome assembly; subunit of the the exocyst complex which mediates polarized targeting and tethering of post-Golgi secretory vesicles to active sites of exocytosis at the plasma membrane (PM) prior to SNARE-mediated fusion; required for exocyst assembly and targeting the complex to specific sites on the bud tip PM; associates the U1 snRNP; ro…
YBR103C-A	YBR103C-A	2	449320	449463	C							Dubious open reading frame; unlikely to encode a functional protein, based on available experimental and comparative sequence data; identified by homology to related yeast
YBR103W	SIF2	2	447709	449316	W	EMB1	5.76925		Abundance_Low		Abundance_Low	WD40 repeat-containing subunit of Set3C histone deacetylase complex; complex represses early/middle sporulation genes; antagonizes telomeric silencing; binds specifically to the Sir4p N-terminus
YBR104W	YMC2	2	449667	450656	W	organic acid transporter	6.36202		Abundance_Low		Abundance_Low	Putative mitochondrial inner membrane transporter; proposed role in oleate metabolism and glutamate biosynthesis; member of the mitochondrial carrier (MCF) family; YMC2 has a paralog, YMC1, that arose from the whole genome duplication
YBR105C	VID24	2	450881	451969	C	glucose-induced degradation complex subunit VID24|GID4	4.83331	365.5		415		GID Complex regulatory subunit; binds GID Complex in response to glucose through interactions with complex member Vid28p; regulates fructose-1,6-bisphosphatase (FBPase) targeting to the vacuole; promotes proteasome-dependent catabolite degradation of FBPase; peripheral membrane protein located at Vid (vacuole import and degradation) vesicles
YBR106W	PHO88	2	452658	453224	W	SND3	9.57855	2718.5		1599.8		Protein involved in SRP-independent targeting of substrates to the ER; component of an alternative ER targeting pathway that has partial functional redundancy with the GET pathway; preference for substrates with downstream transmembrane domains; interacts with Snd1p, Env10p/Snd2p, and Sec61p-translocon subunits; can compensate for loss of SRP; role in phosphate transport, interacting with pho88, …
YBR107C	IML3	2	453793	454530	C	MCM19	4.57814		Abundance_Low		Abundance_Low	Outer kinetochore protein and component of the Ctf19 complex; involved in the establishment of pericentromeric cohesion during mitosis; prevents non-disjunction of sister chromatids during meiosis II; forms a stable complex with Chl4p; required for localization of Sgo1p to pericentric sites during meiosis I; orthologous to human centromere constitutive-associated network (CCAN) subunit CENP-L and…
YBR108W	AIM3	2	454822	457665	W		4.30758					Protein that inhibits barbed-end actin filament elongation; interacts with Rvs167p; null mutant is viable and displays elevated frequency of mitochondrial genome loss
YBR109C	CMD1	2	457919	458362	C	calmodulin|CaM	8.91779	1795		1613		Calmodulin; Ca2+ binding protein that regulates Ca2+ independent processes (mitosis, bud growth, actin organization, endocytosis, etc.) and Ca2+ dependent processes (stress-activated pathways), targets include Nuf1p, Myo2p and calcineurin; binds to the Hog1p MAPK in response to hyperosmotic stress; potentiates membrane tubulation and constriction mediated by the Rvs161p-Rvs167p complex; human CAL…
YBR109W-A	YBR109W-A	2	458608	458832	W							Putative protein of unknown function; questionable ORF from MIPS
YBR110W	ALG1	2	458872	460221	W	chitobiosyldiphosphodolichol beta-1,4 mannosyltransferase	6.61551	148.5		138		Mannosyltransferase; involved in asparagine-linked glycosylation in the endoplasmic reticulum (ER); essential for viability; human homolog ALG1 complements yeast null mutant
YBR111C	YSA1	2	461178	461873	C	ADP-ribose diphosphatase|RMA2	8.2686		Abundance_Low	56.5		Nudix hydrolase family member with ADP-ribose pyrophosphatase activity; shown to metabolize O-acetyl-ADP-ribose to AMP and acetylated ribose 5'-phosphate
YBR111W-A	SUS1	2	462139	462579	W							Component of both the SAGA histone acetylase and TREX-2 complexes; interacts with RNA polymerase II; involved in mRNA export coupled transcription activation and elongation; involved in post-transcriptional tethering of active genes to the nuclear periphery and to non-nascent mRNP
YBR112C	CYC8	2	462870	465770	C	transcription regulator CYC8|[OCT]|[OCT1+]|SSN6|CRT8	6.21136		Failed_QC	210.5		General transcriptional co-repressor; acts together with Tup1p; also acts as part of a transcriptional co-activator complex that recruits the SWI/SNF and SAGA complexes to promoters; can form the prion [OCT+]
YBR113W	YBR113W	2	465566	466048	W		1.35142					Dubious open reading frame; unlikely to encode a functional protein, based on available experimental and comparative sequence data; partially overlaps the verified gene CYC8
YBR114W	RAD16	2	467248	469620	W	DNA repair protein RAD16|PSO5	4.88538		Abundance_Low		Abundance_Low	Nucleotide excision repair (NER) protein; binds damaged DNA during NER; binds DNA in an ATP-dependent manner (with Rad7p) during NER; required for NER of non-transcribed chromatin; subunit of Nucleotide Excision Repair Factor 4 (NEF4) and the Elongin-Cullin-Socs (ECS) ligase complex
YBR115C	LYS2	2	469748	473926	C	L-aminoadipate-semialdehyde dehydrogenase	6.55838	680		3690.5		Alpha aminoadipate reductase; catalyzes the reduction of alpha-aminoadipate to alpha-aminoadipate 6-semialdehyde, which is the fifth step in biosynthesis of lysine; activation requires posttranslational phosphopantetheinylation by Lys5p
YBR116C	YBR116C	2	474199	474726	C		3.18336					Dubious open reading frame; unlikely to encode a functional protein, based on available experimental and comparative sequence data; partially overlaps the verified gene TKL2
YBR117C	TKL2	2	474392	476437	C	transketolase TKL2	3.79205		Abundance_Low		Abundance_Low	Transketolase; catalyzes conversion of xylulose-5-phosphate and ribose-5-phosphate to sedoheptulose-7-phosphate and glyceraldehyde-3-phosphate in the pentose phosphate pathway; needed for synthesis of aromatic amino acids; TKL2 has a paralog, TKL1, that arose from the whole genome duplication
YBR118W	TEF2	2	477671	479047	W	translation elongation factor EF-1 alpha|eEF1A|EF-1 alpha	8.66062	30699.5		24026		Translational elongation factor EF-1 alpha; in the GTP-bound active form, binds to and delivers aminoacylated tRNA to the A-site of ribosomes for elongation of nascent polypeptides; associates with vacuolar Rho1p GTPase; TEF2-RFP levels increase during replicative aging; may also have a role in tRNA re-export from the nucleus; TEF2 has a paralog, TEF1, that arose from the whole genome duplication
YBR119W	MUD1	2	479338	480323	W	U1A|U1-A	5.15099		Abundance_Low		Abundance_Low	U1 snRNP A protein; homolog of human U1-A; involved in nuclear mRNA splicing
YBR120C	CBP6	2	480435	480923	C		5.83263	207		221.8		Mitochondrial protein required for translation of the COB mRNA; forms a complex with Cbp3p that binds to mt ribosomes near the polypeptide tunnel exit and promotes efficient translation of the COB mRNA; Cbp3p-Cbp6p complex also interacts with newly synthesized cytochrome b (Cobp) and Cbp4p to promote assembly of Cobp into the cytochrome bc1 complex; Cbp3p-Cbp6p complex is sequestered if assembly …
YBR121C	GRS1	2	481364	483367	C	glycine--tRNA ligase	8.50676	2608		2160		Cytoplasmic and mitochondrial glycyl-tRNA synthase; ligates glycine to the cognate anticodon-bearing tRNA; transcription termination factor that may interact with the 3'-end of pre-mRNA to promote 3'-end formation; GRS1 has a paralog, GRS2, that arose from the whole genome duplication; human homolog GARS implicated in Charcot-Marie-Tooth disease, can complement yeast null mutant
YBR121C-A	YBR121C-A	2	482326	482484	C							Dubious open reading frame; unlikely to encode a functional protein, based on available experimental and comparative sequence data; completely contained within the verified gene GRS1; identified by expression profiling and mass spectrometry
YBR122C	MRPL36	2	483970	484503	C	mitochondrial 54S ribosomal protein YmL36|YmL36	7.17004	167		229.8		Mitochondrial ribosomal protein of the large subunit; overproduction suppresses mutations in the COX2 leader peptide-encoding region
YBR123C	TFC1	2	484742	486691	C	transcription factor TFIIIC subunit TFC1|tau 95	5.09136	52		51		Subunit of RNA polymerase III transcription initiation factor complex; one of six subunits of the RNA polymerase III transcription initiation factor complex (TFIIIC); part of the TauA globular domain of TFIIIC that binds DNA at the BoxA promoter sites of tRNA and similar genes; human homolog is TFIIIC-63
YBR124W	YBR124W	2	486507	486866	W							Putative protein of unknown function
YBR125C	PTC4	2	487199	488380	C	type 2C protein phosphatase PTC4|GCT1	5.23587		Abundance_Low		Abundance_Low	Cytoplasmic type 2C protein phosphatase (PP2C); identified as a high-copy number suppressor of cnb1 mpk1 synthetic lethality; overexpression decreases high-osmolarity induced Hog1p phosphorylation and kinase activity
YBR126C	TPS1	2	488905	490392	C	alpha,alpha-trehalose-phosphate synthase (UDP-forming) TPS1|TSS1|GLC6|GGS1|FDP1|CIF1|BYP1	7.81486	1279		2145.5		Synthase subunit of trehalose-6-P synthase/phosphatase complex; synthesizes the storage carbohydrate trehalose, which is critically important for survival of long-term desiccation; also found in a monomeric form; expression is induced by the stress response and repressed by the Ras-cAMP pathway; protein abundance increases in response to DNA replication stress and in response to prolonged exposur…
YBR126W-A	MEO1	2	490850	491056	W							Putative protein of unknown function; identified by gene-trapping, microarray analysis, and genome-wide homology searches; mRNA identified as translated by ribosome profiling data; SWAT-GFP, seamless-GFP and mCherry fusion proteins localize to the endoplasmic reticulum; partially overlaps the dubious ORF YBR126W-B
YBR126W-B	YBR126W-B	2	490927	491070	W							Dubious open reading frame; unlikely to encode a functional protein, based on available experimental and comparative sequence data; partially overlaps the dubious ORF YBR126W-A; identified by SAGE
YBR127C	VMA2	2	491269	492822	C	H(+)-transporting V1 sector ATPase subunit B|ATPSV|VAT2	8.41244	1868		1179		Subunit B of V1 peripheral membrane domain of vacuolar H+-ATPase; electrogenic proton pump found throughout the endomembrane system; contains nucleotide binding sites; also detected in the cytoplasm; protein abundance increases in response to DNA replication stress; human homolog ATP6V1B1, implicated in autosomal-recessive distal renal tubular acidosis (RTA) with sensorineural deafness, complemen…
YBR128C	ATG14	2	493081	494115	C	APG14|CVT12	3.28309					Autophagy-specific subunit of phosphatidylinositol 3-kinase complex I; Atg14p targets complex I to the phagophore assembly site (PAS); required for localizing additional ATG proteins to the PAS; required for overflow degradation of misfolded proteins when ERAD is saturated; homolog of human Barkor; other members are Vps34, Vps15, and Vps30p
YBR129C	OPY1	2	494353	495339	C		5.67388		Abundance_Low		Abundance_Low	Protein of unknown function; overproduction blocks cell cycle arrest in the presence of mating pheromone; the authentic, non-tagged protein is detected in highly purified mitochondria in high-throughput studies
YBR130C	SHE3	2	495592	496869	C		5.905	165		163		Protein adaptor between Myo4p and the She2p-mRNA complex; part of the mRNA localization machinery that restricts accumulation of certain proteins to the bud; also required for cortical ER inheritance
YBR131C-A	YBR131C-A	2	497650	497739	C							Dubious open reading frame; unlikely to encode a functional protein, based on available experimental and comparative sequence data; partially overlaps the verified ORF YBR131W; identified by gene-trapping, microarray analysis, and genome-wide homology searches
YBR131W	CCZ1	2	497163	499277	W	CVT16	3.75161		Abundance_Low		Abundance_Low	Subunit of a heterodimeric guanine nucleotide exchange factor (GEF); subunit of the Mon1-Ccz1 GEF complex, which stimulates nucleotide exchange and activation of Ypt7p, a Rab family GTPase involved in membrane tethering and fusion events at the late endosome and vacuole; GEF activity is stimulated by membrane association and anionic phospholipids; involved in localizing Ypt7p to the vacuolar memb…
YBR132C	AGP2	2	499652	501442	C		2.49035	167.5		243		Plasma membrane regulator of polyamine and carnitine transport; has similarity to transporters but lacks transport activity; may act as a sensor that transduces environmental signals; has a positive or negative regulatory effect on transcription of many transporter genes
YBR133C	HSL7	2	501804	504287	C	protein arginine N-methyltransferase	5.31355		Abundance_Low		Abundance_Low	Protein arginine N-methyltransferase; exhibits septin and Hsl1p-dependent localization to the bud neck in budded cells and periodic Hsl1p-dependent phosphorylation; required with Hsl1p, and Elm1p for the mother-bud neck recruitment, phosphorylation, and degradation of Swe1p; interacts directly with Swe1p; relocalizes away from bud neck upon DNA replication stress; human homolog PRMT5 can compleme…
YBR134W	YBR134W	2	504243	504644	W							Dubious open reading frame; unlikely to encode a functional protein, based on available experimental and comparative sequence data
YBR135W	CKS1	2	504854	505306	W	cyclin-dependent protein kinase regulatory subunit CKS1	6.67979		Failed_QC	226.6		Cyclin-dependent protein kinase regulatory subunit and adaptor; interacts with Cdc28p (aka Cdk1p); required for G1/S and G2/M phase transitions and budding; mediates phosphorylation and degradation of Sic1p; modulates proteolysis of M-phase targets through interactions with the proteasome; role in transcriptional regulation, recruiting proteasomal subunits to target gene promoters; human homologs…
YBR136W	MEC1	2	505668	512774	W	protein kinase MEC1|RAD31|SAD3|ESR1	2.66476					Genome integrity checkpoint protein and PI kinase superfamily member; Mec1p and Dun1p function in same pathway to regulate dNTP pools and telomere length; signal transducer required for cell cycle arrest and transcriptional responses to damaged or unreplicated DNA; facilitates replication fork progression and regulates P-body formation under replication stress; promotes interhomolog recombination…
YBR137W	YBR137W	2	513044	513583	W		6.72469		Abundance_Low	72.2		Protein with a role in ER delivery of tail-anchored membrane proteins; interacts with Sgt2p; binds to the TRC complex, which inserts proteins into the ER membrane; interacts with Msn5p karyopherin; YBR137W is not an essential gene
YBR138C	YBR138C	2	513762	515336	C	HDR1	4.35257		Abundance_Low		Abundance_Low	Cytoplasmic protein of unknown function; APCC(Cdh1) substrate; potentially phosphorylated by Cdc28p; YBR138C is not an essential gene
YBR139W	YBR139W	2	515664	517190	W	carboxypeptidase C	6.47225		Abundance_Low		Abundance_Low	Putative serine type carboxypeptidase; role in phytochelatin synthesis; green fluorescent protein (GFP)-fusion protein localizes to the vacuole; expression induced by nitrogen limitation in a GLN3, GAT1-independent manner
YBR140C	IRA1	2	517350	526628	C	GTPase-activating protein IRA1|PPD1|GLC1	3.69635	53		97.8		GTPase-activating protein; negatively regulates RAS by converting it from GTP- to the GDP-bound inactive form, required for reducing cAMP levels under nutrient limiting conditions, mediates membrane association of adenylate cyclase; mutations cause catalase T deficiency, defective glycogen synthesis and defective trehalose accumulation; IRA1 has a paralog, IRA2, that arose from the whole genome d…
YBR141C	BMT2	2	527025	528038	C	25S rRNA (adenine2142-N1)-methyltransferase	4.93398		Abundance_Low		Abundance_Low	Nucleolar S-adenosylmethionine-dependent rRNA methyltransferase; methylates adenine (m1A) of the large subunit (LSU) rRNA at position 2142; belongs to Rossmann fold superfamily; green fluorescent protein (GFP)-fusion protein localizes to the nucleolus; YBR141C is not an essential gene
YBR141W-A	YBR141W-A	2	527167	527262	W							Dubious open reading frame; unlikely to encode a functional protein, based on available experimental and comparative sequence data; overlaps the uncharacterized ORF YBR141C; identified by gene-trapping, microarray analysis, and genome-wide homology searching
YBR142W	MAK5	2	528317	530638	W	putative ATP-dependent RNA helicase	6.0024	180.5		101		Essential nucleolar protein; putative DEAD-box RNA helicase required for maintenance of M1 dsRNA virus; involved in biogenesis of large (60S) ribosomal subunits
YBR143C	SUP45	2	530869	532182	C	translation termination factor eRF1|eRF1|SUP47|SUP1|SAL4	8.77131	3019.5		2158.5		Polypeptide release factor (eRF1) in translation termination; mutant form acts as a recessive omnipotent suppressor; methylated by Mtq2p-Trm112p in ternary complex eRF1-eRF3-GTP; mutation of methylation site confers resistance to zymocin; has a role in cytokinesis through interaction with Mlc1p
YBR144C	YBR144C	2	533235	533549	C							Dubious open reading frame; unlikely to encode a functional protein, based on available experimental and comparative sequence data; YBR144C is not an essential gene
YBR145W	ADH5	2	533762	534817	W	alcohol dehydrogenase ADH5	5.81712		Abundance_Low		Abundance_Low	Alcohol dehydrogenase isoenzyme V; involved in ethanol production; ADH5 has a paralog, ADH1, that arose from the whole genome duplication
YBR146W	MRPS9	2	535260	536096	W	mitochondrial 37S ribosomal protein MRPS9	6.84554					Mitochondrial ribosomal protein of the small subunit
YBR147W	RTC2	2	536575	537465	W	cationic amino acid transporter|YPQ3|RRT11	6.11874					Putative vacuolar membrane transporter for cationic amino acids; likely contributes to amino acid homeostasis by exporting cationic amino acids from the vacuole; positive regulation by Lys14p suggests that lysine may be the primary substrate; member of the PQ-loop family, with seven transmembrane domains; similar to mammalian PQLC2 vacuolar transporter; RTC2 has a paralog, YPQ1, that arose from t…
YBR148W	YSW1	2	537876	539705	W		2.63333					Protein required for normal prospore membrane formation; interacts with Gip1p, which is the meiosis-specific regulatory subunit of the Glc7p protein phosphatase; expressed specifically in spores and localizes to the prospore membrane; YSW1 has a paralog, SPO21, that arose from the whole genome duplication
YBR149W	ARA1	2	539987	541021	W	D-arabinose 1-dehydrogenase (NAD(P)(+)) ARA1	8.58943	100.5		243		NADP+ dependent arabinose dehydrogenase; involved in carbohydrate metabolism; purified as homodimer; naturally occurs with a N-terminus degradation product
YBR150C	TBS1	2	541209	544493	C		3.73226		Abundance_Low		Abundance_Low	Protein of unknown function; the authentic, non-tagged protein is detected in highly purified mitochondria in high-throughput studies; TBS1 has a paralog, HAL9, that arose from the whole genome duplication
YBR151W	APD1	2	545028	545978	W		7.23767	166		152		Protein of unknown function; required for normal localization of actin patches and for normal tolerance of sodium ions and hydrogen peroxide; localizes to both cytoplasm and nucleus
YBR152W	SPP381	2	546376	547251	W	U4/U6-U5 snRNP complex subunit SPP381	4.37975	100		69.5		mRNA splicing factor, component of U4/U6.U5 tri-snRNP; interacts genetically and physically with Prp38p; relocalizes to the cytosol in response to hypoxia
YBR153W	RIB7	2	547460	548194	W	2,5-diamino-6-(ribosylamino)-4(3H)-pyrimidinone 5'-phosphate reductase	6.06614					Diaminohydroxyphoshoribosylaminopyrimidine deaminase; catalyzes the second step of the riboflavin biosynthesis pathway
YBR154C	RPB5	2	548362	549009	C	DNA-directed RNA polymerase core subunit RPB5|ABC27	8.14761					RNA polymerase subunit ABC27; common to RNA polymerases I, II, and III; contacts DNA and affects transactivation
YBR155W	CNS1	2	549771	550928	W	HSP70/90 family co-chaperone CNS1	5.98555	273.5		178.5		TPR-containing co-chaperone; binds both Hsp82p (Hsp90) and Ssa1p (Hsp70); stimulates ATPase activity of Ssa1p; ts mutants reduce Hsp82p function, overexpression suppresses phenotypes of HSP82 ts allele and cpr7 deletion; human homolog TTC4 complements yeast cns1 mutant
YBR156C	SLI15	2	551104	553200	C		4.11832		Abundance_Low		Abundance_Low	Subunit of the conserved chromosomal passenger complex (CPC); complex regulates kinetochore-microtubule attachments, activation of the spindle tension checkpoint, and mitotic spindle disassembly; other complex members are Ipl1p, Bir1p, and Nbl1p
YBR157C	ICS2	2	553543	554310	C		4.39419					Protein of unknown function; null mutation does not confer any obvious defects in growth, spore germination, viability, or carbohydrate utilization
YBR158W	AMN1	2	556549	558198	W	CST13|ICS4	7.60941		Abundance_Low		Abundance_Low	Protein required for daughter cell separation; multiple mitotic checkpoints, and chromosome stability; contains 12 degenerate leucine-rich repeat motifs; expression is induced by the Mitotic Exit Network (MEN)
YBR159W	IFA38	2	558685	559728	W	ketoreductase	7.69638	669.5		461.5		Microsomal beta-keto-reductase; contains oleate response element (ORE) sequence in the promoter region; mutants exhibit reduced VLCFA synthesis, accumulate high levels of dihydrosphingosine, phytosphingosine and medium-chain ceramides
YBR160W	CDC28	2	560078	560974	W	cyclin-dependent serine/threonine-protein kinase CDC28|SRM5|HSL5|CDK1	6.43473	542		343		Cyclin-dependent kinase (CDK) catalytic subunit; master regulator of mitotic and meiotic cell cycles; alternately associates with G1, S, G2/M phase cyclins, which provide substrate specificity; regulates metabolism, basal transcription, chromosome dynamics, growth and morphogenesis; transcript induction in osmostress involves antisense RNA; human homologs CDK1, CDK2, CDK3 can complement yeast con…
YBR161W	CSH1	2	561634	562764	W	mannosylinositol phosphorylceramide synthase catalytic subunit CSH1	5.59835		Failed_QC/Abundance_Low		Abundance_Low	Mannosylinositol phosphorylceramide (MIPC) synthase catalytic subunit; forms a complex with regulatory subunit Csg2p; function in sphingolipid biosynthesis is overlapping with that of Sur1p; CSH1 has a paralog, SUR1, that arose from the whole genome duplication
YBR162C	TOS1	2	563203	564570	C		9.0067	423.5		199		Covalently-bound cell wall protein of unknown function; identified as a cell cycle regulated SBF target gene; deletion mutants are highly resistant to treatment with beta-1,3-glucanase; has sequence similarity to YJL171C
YBR162W-A	YSY6	2	565231	565428	W			124.5		59.5		Protein of unknown function; expression suppresses a secretory pathway mutation in E. coli; has similarity to the mammalian RAMP4 protein involved in secretion
YBR163W	EXO5	2	565723	567480	W	DEM1	5.22424		Abundance_Low		Abundance_Low	Mitochondrial 5'-3' exonuclease and sliding exonuclease; required for mitochondrial genome maintenance; distantly related to the RecB nuclease domain of bacterial RecBCD recombinases; may be regulated by the transcription factor Ace2
YBR164C	ARL1	2	567875	568426	C	Arf family GTPase ARL1|DLP2	7.14424	408		235		Soluble GTPase with a role in regulation of membrane traffic; regulates potassium influx; role in membrane organization at trans-Golgi network; required for delivery of Atg9p to the phagophore assembly site during autophagy under high temperature stress; required with Ypt6p for starvation-induced autophagy; required for the CVT pathway under non-starvation conditions; G protein of the Ras superfa…
YBR165W	UBS1	2	568852	569685	W		5.58345					Ubiquitin-conjugating enzyme suppressor that regulates Cdc34p; functions as a general positive regulator of Cdc34p activity; nuclear protein that may represent a link between nucleocytoplasmic transport and ubiquitin ligase activity
YBR166C	TYR1	2	569842	571200	C	prephenate dehydrogenase (NADP(+))	5.81602	169.5		155.5		Prephenate dehydrogenase involved in tyrosine biosynthesis; expression is dependent on phenylalanine levels
YBR167C	POP7	2	571468	571890	C	ribonuclease P/MRP protein subunit POP7|RPP2	5.64649		Abundance_Low	85		Subunit of RNase MRP, nuclear RNase P and telomerase; forms a soluble heterodimer with Pop6p that binds P3 domain of RNase MRP and RNase P RNAs; RNase MRP cleaves pre-rRNA, nuclear RNase P cleaves tRNA precursors to generate mature 5' ends and facilitates turnover of nuclear RNAs, while telomerase replenishes telomeric DNA
YBR168W	PEX32	2	572371	573612	W		4.90592		Abundance_Low		Abundance_Low	Peroxisomal integral membrane protein; involved in negative regulation of peroxisome size; partially functionally redundant with Pex31p; genetic interactions suggest action at a step downstream of steps mediated by Pex28p and Pex29p
YBR169C	SSE2	2	573915	575996	C	adenyl-nucleotide exchange factor SSE2	5.40673	144		301		Member of Hsp110 subclass of the heat shock protein 70 (HSP70) family; serves as nucleotide exchange factor to load ATP onto the SSA class of cytosolic Hsp70s; may be involved in protein folding; localized to the cytoplasm; SSE2 has a paralog, SSE1, that arose from the whole genome duplication
YBR170C	NPL4	2	576344	578086	C	HRD4	5.60179	175.5		148.5		Substrate-recruiting cofactor of the Cdc48p-Npl4p-Ufd1p segregase; assists Cdc48p in the dislocation of misfolded, polyubiquitinated ERAD substrates that are subsequently delivered to the proteasome for degradation; also involved in the regulated destruction of resident ER membrane proteins, such as HMG-CoA reductase (Hmg1/2p) and cytoplasmic proteins (Fbp1p); role in mobilizing membrane bound tr…
YBR171W	SEC66	2	578364	578984	W	KAR7|Sec63 complex subunit SEC66|SEC71|HSS1	7.39194	623.5		463.5		Non-essential subunit of Sec63 complex; with Sec61 complex, Kar2p/BiP and Lhs1p forms a channel competent for SRP-dependent and post-translational SRP-independent protein targeting and import into the ER; other members are Sec63p, Sec62p, and Sec72p
YBR172C	SMY2	2	579150	581372	C		6.29504	192		238		GYF domain protein; involved in COPII vesicle formation; interacts with the Sec23p/Sec24p subcomplex; overexpression suppresses the temperature sensitivity of a myo2 mutant; similar to S. pombe Mpd2; SMY2 has a paralog, SYH1, that arose from the whole genome duplication
YBR173C	UMP1	2	581726	582172	C	RNS2	8.00247		Abundance_Low		Abundance_Low	Chaperone required for correct maturation of the 20S proteasome; short-lived chaperone; may inhibit premature dimerization of proteasome half-mers; degraded by proteasome upon completion of its assembly
YBR174C	YBR174C	2	582338	582652	C							Dubious open reading frame; unlikely to encode a functional protein, based on available experimental and comparative sequence data; partially overlaps the verified ORF YBR175W; null mutant is viable and sporulation defective
YBR175W	SWD3	2	582408	583355	W	SAF35|CPS30	5.47072		Abundance_Low		Abundance_Low	Essential subunit of the COMPASS (Set1C) complex; COMPASS methylates histone H3 on lysine 4 and is required in transcriptional silencing near telomeres; WD40 beta propeller superfamily member and ortholog of mammalian WDR5
YBR176W	ECM31	2	583720	584658	W	3-methyl-2-oxobutanoate hydroxymethyltransferase	5.13296		Abundance_Low		Abundance_Low	Ketopantoate hydroxymethyltransferase; required for pantothenic acid biosynthesis, converts 2-oxoisovalerate into 2-dehydropantoate
YBR177C	EHT1	2	584807	586162	C	medium-chain fatty acid ethyl ester synthase/esterase	8.05235	190		363.5		Acyl-coenzymeA:ethanol O-acyltransferase; plays a minor role in medium-chain fatty acid ethyl ester biosynthesis; possesses short-chain esterase activity; localizes to lipid particles and the mitochondrial outer membrane; EHT1 has a paralog, EEB1, that arose from the whole genome duplication
YBR178W	YBR178W	2	586071	586445	W							Dubious open reading frame; unlikely to encode a functional protein, based on available experimental and comparative sequence data; partially overlaps the verified gene YBR177C
YBR179C	FZO1	2	586547	589114	C	mitofusin	4.93515	68		60.5		Mitofusin; integral membrane protein involved in mitochondrial outer membrane tethering and fusion; role in mitochondrial genome maintenance; efficient tethering and degradation of Fzo1p requires an intact N-terminal GTPase domain; targeted for destruction by the ubiquitin ligase SCF-Mdm30p and the cytosolic ubiquitin-proteasome system
YBR180W	DTR1	2	589741	591459	W							Putative dityrosine transporter of the major facilitator superfamily; member of the 12-spanner drug:H(+) antiporter DHA1 family; required for spore wall synthesis; sequence similarity to QDR1 and QDR3, and the triple mutant dtr1 qdr1 qdr3 exhibits reduced dityrosine fluorescence relative to the single mutants; expressed during sporulation
YBR181C	RPS6B	2	591712	592774	C	eS6|ribosomal 40S subunit protein S6B|S6e|RPS102|RPS101|LPG18	11.2236	260		287		Protein component of the small (40S) ribosomal subunit; homologous to mammalian ribosomal protein S6, no bacterial homolog; phosphorylated on S233 by Ypk3p in a TORC1-dependent manner, and on S232 in a TORC1/2-dependent manner by Ypk1/2/3p; RPS6B has a paralog, RPS6A, that arose from the whole genome duplication
YBR182C	SMP1	2	593506	594864	C		5.31127					MADS-box transcription factor involved in osmotic stress response; SMP1 has a paralog, RLM1, that arose from the whole genome duplication
YBR182C-A	YBR182C-A	2	595361	595555	C							Putative protein of unknown function; identified by gene-trapping, microarray-based expression analysis, and genome-wide homology searching
YBR183W	YPC1	2	596115	597065	W	phytoceramidase	4.49487					Alkaline ceramidase; also has reverse (CoA-independent) ceramide synthase activity; catalyzes both breakdown and synthesis of phytoceramide; overexpression confers fumonisin B1 resistance; YPC1 has a paralog, YDC1, that arose from the whole genome duplication
YBR184W	YBR184W	2	597363	598934	W		2.29241					Putative protein of unknown function; YBR184W is not an essential gene
YBR185C	MBA1	2	599123	599959	C		5.51023	118		129.5		Membrane-associated mitochondrial ribosome receptor; forms a complex with Mdm38p that may facilitate recruitment of mRNA-specific translational activators to ribosomes; possible role in protein export from the matrix to inner membrane
YBR186W	PCH2	2	600553	602360	W							Hexameric ring ATPase that remodels chromosome axis protein Hop1p; nucleolar component of the pachytene checkpoint, which prevents chromosome segregation when recombination and chromosome synapsis are defective; also represses meiotic interhomolog recombination in rDNA; required for meiotic double-stranded break formation
YBR187W	GDT1	2	602634	603476	W	putative ribosome biosynthesis protein GDT1	6.76437	204.5		87		Calcium transporter localized to the cis- and medial-Golgi apparatus; required for protein glycosylation; GFP-fusion protein localizes to the vacuole; TMEM165, a human gene which causes Congenital Disorders of Glycosylation is orthologous and functionally complements the null allele; expression pattern and physical interactions suggest a possible role in ribosome biogenesis; expression reduced in…
YBR188C	NTC20	2	603685	604107	C		5.93689	46.5		106		Member of the NineTeen Complex (NTC); this complex contains Prp19p and stabilizes U6 snRNA in catalytic forms of the spliceosome containing U2, U5, and U6 snRNAs
YBR189W	RPS9B	2	604508	605508	W	ribosomal 40S subunit protein S9B|rp21|YS11|S9B|S4|S13|SUP46|RPS13A	11.2996	8509			No_Measurement	Protein component of the small (40S) ribosomal subunit; homologous to mammalian ribosomal protein S9 and bacterial S4; RPS9B has a paralog, RPS9A, that arose from the whole genome duplication
YBR190W	YBR190W	2	605966	606277	W		2.34882					Dubious open reading frame; unlikely to encode a functional protein, based on available experimental and comparative sequence data; partially overlaps the verified ribosomal protein gene RPL21A/YBR191W
YBR191W	RPL21A	2	606270	607140	W	eL21|ribosomal 60S subunit protein L21A|L21e|L21A|URP1	10.7912	4399		3283.5		Ribosomal 60S subunit protein L21A; homologous to mammalian ribosomal protein L21, no bacterial homolog; RPL21A has a paralog, RPL21B, that arose from the whole genome duplication
YBR191W-A	YBR191W-A	2	607149	607223	W							Dubious open reading frame; unlikely to encode a functional protein, based on available experimental and comparative sequence data
YBR192W	RIM2	2	607652	608785	W	PYT1	5.65018					Mitochondrial pyrimidine nucleotide transporter; imports pyrimidine nucleoside triphosphates and exports pyrimidine nucleoside monophosphates; member of the mitochondrial carrier family
YBR193C	MED8	2	609082	609753	C		5.09449	57.5			Abundance_Low	Subunit of the RNA polymerase II mediator complex; associates with core polymerase subunits to form the RNA polymerase II holoenzyme; essential for transcriptional regulation
YBR194W	AIM4	2	610038	610409	W	SOY1	4.88294		Abundance_Low		Abundance_Low	Protein proposed to be associated with the nuclear pore complex; null mutant is viable, displays elevated frequency of mitochondrial genome loss and is sensitive to freeze-thaw stress
YBR195C	MSI1	2	610614	611882	C	CAC3	5.32867		Abundance_Low		Abundance_Low	Subunit of chromatin assembly factor I (CAF-1); chromatin assembly by CAF-1 affects multiple processes including silencing at telomeres, mating type loci, and rDNA; maintenance of kinetochore structure; deactivation of DNA damage checkpoint after DNA repair; chromatin dynamics during transcription; and repression of divergent noncoding transcription; Msi1p localizes to nucleus and cytoplasm and i…
YBR196C	PGI1	2	612236	613900	C	glucose-6-phosphate isomerase|CDC30	9.53655	12656.5		9360		Glycolytic enzyme phosphoglucose isomerase; catalyzes the interconversion of glucose-6-phosphate and fructose-6-phosphate; required for cell cycle progression and completion of the gluconeogenic events of sporulation
YBR196C-A	YBR196C-A	2	614024	614173	C							Putative protein of unknown function; identified by fungal homology and RT-PCR
YBR196C-B	YBR196C-B	2	614526	614630	C							Putative protein of unknown function; identified by expression profiling and mass spectrometry
YBR197C	YBR197C	2	615203	615856	C		4.73852		Abundance_Low		Abundance_Low	Protein of unknown function; green fluorescent protein (GFP)-fusion protein localizes to the cytoplasm and nucleus; YBR197C is not an essential gene; relative distribution to the nucleus increases upon DNA replication stress; YBR197C has a paralog, YPL077C, that arose from the whole genome duplication
YBR198C	TAF5	2	616127	618523	C	chromatin modification protein|TafII90|TAF90	5.89281		Abundance_Low		Abundance_Low	Subunit (90 kDa) of TFIID and SAGA complexes; involved in RNA polymerase II transcription initiation and in chromatin modification
YBR199W	KTR4	2	618909	620303	W	putative mannosyltransferase	7.36496	84.5		72.5		Glycosyltransferase involved in protein glycosylation; transfers GDP-mannose to methyl-alpha-mannoside in vitro; member of the KRE2/MNT1 mannosyltransferase family of type II membrane proteins with a short cytoplasmic N-terminus, a membrane-spanning region and a highly conserved catalytic lumenal domain
YBR200W	BEM1	2	620872	622527	W	phosphatidylinositol-3-phosphate-binding protein BEM1|SRO1	5.41338	145.5		140.5		Protein containing SH3-domains; involved in establishing cell polarity and morphogenesis; functions as a scaffold protein for complexes that include Cdc24p, Ste5p, Ste20p, and Rsr1p
YBR200W-A	YBR200W-A	2	622983	623147	W							Putative protein of unknown function; identified by fungal homology and RT-PCR
YBR201C-A	YBR201C-A	2	624493	624696	C							Putative protein of unknown function
YBR201W	DER1	2	623576	624211	W	derlin	5.45553					ER membrane protein that promotes export of misfolded polypeptides; required for ER-associated protein degradation of misfolded or unassembled proteins; initiates export of aberrant polypeptides from ER lumen by threading them into ER membrane and routing them to Hrd1p for ubiquitination; function normally requires N-terminal acetylation by NatB; N- and C- termini protrude into cytoplasm; similar…
YBR202W	MCM7	2	625772	628309	W	mini-chromosome maintenance complex protein 7|CDC47	5.77817	237.5		181		Component of the Mcm2-7 hexameric helicase complex; MCM2-7 primes origins of DNA replication in G1 and becomes an active ATP-dependent helicase that promotes DNA melting and elongation in S-phase; forms an Mcm4p-6p-7p subcomplex
YBR203W	COS111	2	629168	631942	W		3.95895					Protein required for antifungal drug ciclopirox olamine resistance; not related to the subtelomerically-encoded COS family; the authentic, non-tagged protein is detected in highly purified mitochondria in high-throughput studies
YBR204C	LDH1	2	632254	633381	C	triacylglycerol lipase	4.96725					Serine hydrolase; exhibits active esterase plus weak triacylglycerol lipase activities; proposed role in lipid homeostasis, regulating phospholipid and non-polar lipid levels and required for mobilization of LD-stored lipids; localizes to the lipid droplet (LD) surface; contains a classical serine containing catalytic triad (GxSxG motif)
YBR205W	KTR3	2	633622	634836	W	mannosyltransferase KTR3	6.64784	61.5			Abundance_Low	Putative alpha-1,2-mannosyltransferase; involved in O- and N-linked protein glycosylation; member of the KRE2/MNT1 mannosyltransferase family; Svp26p mediates uptake of Ktr3p into COPII vesicles; relocalizes from nucleus to vacuole upon DNA replication stress
YBR206W	YBR206W	2	634601	634924	W		6.77736					Dubious open reading frame; unlikely to encode a functional protein, based on available experimental and comparative sequence data; partially overlaps the verified gene KTR3
YBR207W	FTH1	2	635146	636543	W		7.17465	412		173		Putative high affinity iron transporter; involved in transport of intravacuolar stores of iron; forms complex with Fet5p; expression is regulated by iron; proposed to play indirect role in endocytosis; protein abundance increases in response to DNA replication stress
YBR208C	DUR1,2	2	636703	642210	C	bifunctional urea carboxylase/allophanate hydrolase|DUR80	4.65754	88		179.5		Urea amidolyase; contains both urea carboxylase and allophanate hydrolase activities, degrades urea to CO2 and NH3; expression sensitive to nitrogen catabolite repression and induced by allophanate, an intermediate in allantoin degradation; protein abundance increases in response to DNA replication stress
YBR209W	YBR209W	2	642583	642900	W							Dubious open reading frame; unlikely to encode a functional protein, based on available experimental and comparative sequence data; YBR209W is not an essential gene
YBR210W	ERV15	2	645550	645978	W		6.32532					Protein involved in export of proteins from the endoplasmic reticulum; ERV15 has a paralog, ERV14, that arose from the whole genome duplication
YBR211C	AME1	2	646158	647132	C	ARP100	4.91769	61			Abundance_Low	Essential kinetochore protein associated with microtubules and SPBs; component of the kinetochore sub-complex COMA (Ctf19p, Okp1p, Mcm21p, Ame1p); involved in spindle checkpoint maintenance; orthologous to human centromere constitutive-associated network (CCAN) subunit CENP-U and fission yeast Mis17; relative distribution to the nucleus increases upon DNA replication stress
YBR212W	NGR1	2	647886	649904	W	RBP1	4.87628	135.5		147.5		RNA binding protein that negatively regulates growth rate; interacts with the 3' UTR of the mitochondrial porin (POR1) mRNA and enhances its degradation; overexpression impairs mitochondrial function; interacts with Dhh1p to mediate POR1 mRNA decay; expressed in stationary phase
YBR213W	MET8	2	650368	651192	W	bifunctional precorrin-2 dehydrogenase/sirohydrochlorin ferrochelatase MET8	5.76044					Bifunctional dehydrogenase and ferrochelatase; involved in the biosynthesis of siroheme, a prosthetic group used by sulfite reductase; required for sulfate assimilation and methionine biosynthesis
YBR214W	SDS24	2	651415	652998	W		5.91566	138		235		Protein involved in cell separation during budding; one of two S. cerevisiae homologs (Sds23p and Sds24p) of the S. pombe Sds23 protein, which is implicated in APC/cyclosome regulation; may play an indirect role in fluid-phase endocytosis; protein abundance increases in response to DNA replication stress; SDS24 has a paralog, SDS23, that arose from the whole genome duplication
YBR215W	HPC2	2	653356	655317	W		5.17565		Abundance_Low		Failed_QC	Subunit of the HIR complex; HIR is a nucleosome assembly complex involved in regulation of histone gene transcription; mutants display synthetic defects with subunits of FACT, a complex that allows passage of RNA Pol II through nucleosomes
YBR216C	YBP1	2	655576	657600	C		4.67819	101.5		101.5		Protein involved in cellular response to oxidative stress; required for oxidation of specific cysteine residues of transcription factor Yap1p, resulting in nuclear localization of Yap1p in response to stress; YBP1 has a paralog, YBP2, that arose from the whole genome duplication
YBR217W	ATG12	2	657832	658392	W	APG12	4.88763					Ubiquitin-like modifier involved in autophagy and the Cvt pathway; conserved; conjugated to Atg5p to form a complex involved in Atg8p lipidation; Atg5p-Atg12p conjugate enhances E2 activity of Atg3p by rearranging its catalytic site, also forms a complex with Atg16p; the Atg5-Atg12/Atg16 complex binds to membranes and is essential for autophagosome formation
YBR218C	PYC2	2	658707	662249	C	pyruvate carboxylase 2	6.12604	807.5		1854.5		Pyruvate carboxylase isoform; cytoplasmic enzyme that converts pyruvate to oxaloacetate; differentially regulated than isoform Pyc1p; mutations in the human homolog are associated with lactic acidosis; PYC2 has a paralog, PYC1, that arose from the whole genome duplication
YBR219C	YBR219C	2	662499	663303	C							Putative protein of unknown function; YBR219C is not an essential gene
YBR220C	YBR220C	2	662995	664677	C		6.12175					Putative protein of unknown function; YBR220C is not an essential gene
YBR221C	PDB1	2	665153	666253	C	pyruvate dehydrogenase (acetyl-transferring) subunit E1 beta	8.70029	545.5		530.5		E1 beta subunit of the pyruvate dehydrogenase (PDH) complex; PDH is an evolutionarily conserved multi-protein complex found in mitochondria
YBR221W-A	YBR221W-A	2	666538	666642	W							Putative protein of unknown function; identified by expression profiling and mass spectrometry
YBR222C	PCS60	2	666720	668351	C	FAT2	5.83899	301		334		Oxalyl-CoA synthetase; capable of catalyzing conversion of oxalate to oxalyl-CoA; catalyzes first step in pathway of oxalate degradation that functions to protect yeast from inhibitory effects of oxalate; peroxisomal protein that binds mRNA; localizes to both peroxisomal peripheral membrane and matrix, expression is highly inducible by oleic acid; similar to E. coli long chain acyl-CoA synthetase
YBR223C	TDP1	2	668663	670297	C	tyrosyl-DNA phosphodiesterase 1	3.8536		Abundance_Low		Abundance_Low	Tyrosyl-DNA phosphodiesterase I; hydrolyzes 3' and 5'-phosphotyrosyl bonds; involved in the repair of DNA lesions created by topo I and topo II; mutations in the human homolog, TDP1, result in the a neurodegenerative disease, spinocerebellar ataxia with axonal neuropathy (SCAN1); yeast cells and human rhabdomyosarcoma lines that overexpress TDP1 both exhibit elevated dosage chromosomal instabilit…
YBR223W-A	YBR223W-A	2	668721	668840	W							Dubious open reading frame; unlikely to encode a functional protein, based on available experimental and comparative sequence data; completely overlaps YBR223C; identified by gene-trapping, microarray-based expression analysis, and genome-wide homology searching
YBR224W	YBR224W	2	670125	670640	W							Dubious open reading frame; unlikely to encode a functional protein, based on available experimental and comparative sequence data; partially overlaps the verified gene TDP1
YBR225W	YBR225W	2	670627	673329	W		3.65977		Abundance_Low		Abundance_Low	Putative protein of unknown function; non-essential gene identified in a screen for mutants affected in mannosylphophorylation of cell wall components
YBR226C	YBR226C	2	673155	673565	C							Dubious open reading frame; unlikely to encode a functional protein, based on available experimental and comparative sequence data; partially overlaps the uncharacterized ORF YBR225W
YBR227C	MCX1	2	673572	675134	C		5.56456	72		117		Non-proteolytic ATPase of the AAA family; stimulates incorporation of the pyridoxal phosphate cofactor into Hem1p (5-aminolevulinic acid synthase); localized to the mitochondrial matrix; ortholog of vertebrate CLPX, which promotes erythropoiesis
YBR228W	SLX1	2	675313	676227	W	endonuclease	5.05372					Endonuclease involved in DNA recombination and repair; subunit of a complex, with Slx4p, that hydrolyzes 5' branches from duplex DNA in response to stalled or converging replication forks; function overlaps with that of Sgs1p-Top3p
YBR229C	ROT2	2	676357	679221	C	glucan 1,3-alpha-glucosidase ROT2|GLS2	5.15315					Glucosidase II catalytic subunit; required to trim the final glucose in N-linked glycans; required for normal cell wall synthesis; mutations in rot2 suppress tor2 mutations, and are synthetically lethal with rot1 mutations
YBR230C	OM14	2	679549	680050	C		7.50461		Abundance_Low		Abundance_Low	Mitochondrial outer membrane receptor for cytosolic ribosomes; integral protein of the outer membrane that interacts with the nascent chain-associated complex (NAC) bound to ribosomes, contributing to co-translational mitochondrial import; interacts with porin (Por1p) and Om45p; abundance is decreased in cells grown in glucose relative to other carbon sources
YBR230W-A	YBR230W-A	2	680362	680562	W							Putative protein of unknown function; YBR230W-A has a paralog, COQ8, that arose from the whole genome duplication
YBR231C	SWC5	2	682179	683090	C	AOR1	5.60653		Abundance_Low		Abundance_Low	Component of the SWR1 complex; complex exchanges histone variant H2AZ (Htz1p) for chromatin-bound histone H2A; protein abundance increases in response to DNA replication stress; relocalizes to the cytosol in response to hypoxia
YBR232C	YBR232C	2	683373	683732	C							Dubious open reading frame; unlikely to encode a functional protein, based on available experimental and comparative sequence data
YBR233W	PBP2	2	683428	684669	W	HEK1	5.38429		Abundance_Low		Abundance_Low	RNA binding protein; has similarity to mammalian heterogeneous nuclear RNP K protein, involved in the regulation of telomere position effect and telomere length; relative distribution to the nucleus increases upon DNA replication stress
YBR233W-A	DAD3	2	684977	685261	W			111.5			Abundance_Low	Essential subunit of the Dam1 complex (aka DASH complex); complex couples kinetochores to the force produced by MT depolymerization thereby aiding in chromosome segregation; is transferred to the kinetochore prior to mitosis
YBR234C	ARC40	2	685438	686592	C		7.69923		Failed_QC	839.5		Subunit of the ARP2/3 complex; ARP2/3 is required for the motility and integrity of cortical actin patches
YBR235W	VHC1	2	686901	690263	W		4.71889		Abundance_Low		Abundance_Low	Vacuolar membrane cation-chloride cotransporter (CCC); likely mediates K+ and Cl- cotransport into the vacuole; has a role in potassium homeostasis and salt tolerance; localizes to sites of contact between the vacuole and mitochondria (vCLAMPs); similar to mammalian electroneutral Na(+)-(K+)-C1- cotransporter family
YBR236C	ABD1	2	690383	691693	C	mRNA (guanine-N7)-methyltransferase	5.92113	75		75		Methyltransferase; catalyzes the transfer of a methyl group from S-adenosylmethionine to the GpppN terminus of capped mRNA; nuclear protein that relocalizes to the cytosol in response to hypoxia
YBR237W	PRP5	2	691969	694518	W	DEAD-box RNA helicase PRP5|RNA5	4.71071	68		51.5		RNA helicase in the DEAD-box family; necessary for prespliceosome formation, bridges U1 and U2 snRNPs and enables stable U2 snRNP association with intron RNA
YBR238C	YBR238C	2	695107	697302	C		3.70233		Abundance_Low		Abundance_Low	Mitochondrial membrane protein; not required for respiratory growth but causes a synthetic respiratory defect in combination with rmd9 mutations; transcriptionally up-regulated by TOR; deletion increases life span; YBR238C has a paralog, RMD9, that arose from the whole genome duplication
YBR239C	ERT1	2	698354	699943	C		3.98728		Abundance_Low		Abundance_Low	Transcriptional regulator; involved in regulation of gluconeogenesis and fermentable carbon utilization; GFP-fusion protein localizes to cytoplasm, nucleus; null mutation affects periodicity of transcriptional and metabolic oscillation; plays role in restricting Ty1 transposition; member of the zinc cluster family of proteins, similar to Rds2p
YBR240C	THI2	2	700490	701842	C	phoF|PHO6	3.84483					Transcriptional activator of thiamine biosynthetic genes; interacts with regulatory factor Thi3p to control expression of thiamine biosynthetic genes with respect to thiamine availability; acts together with Pdc2p to respond to thiaminediphosphate demand, possibly as related to carbon source availability; zinc finger protein of the Zn(II)2Cys6 type
YBR241C	YBR241C	2	702589	704055	C		4.97748	101.5		99.5		Putative transporter, member of the sugar porter family; green fluorescent protein (GFP)-fusion protein localizes to the vacuolar membrane; YBR241C is not an essential gene; YBR241C has a paralog, VPS73, that arose from the whole genome duplication
YBR242W	YBR242W	2	704670	705386	W		6.49005	77			Abundance_Low	Putative protein of unknown function; green fluorescent protein (GFP)-fusion protein localizes to the cytoplasm and nucleus; YBR242W is not an essential gene; YBR242W has a paralog, YGL101W, that arose from the whole genome duplication
YBR243C	ALG7	2	705447	706793	C	UDP-N-acetylglucosamine--dolichyl-phosphate N-acetylglucosaminephosphotransferase|TUR1	5.45987					UDP-N-acetyl-glucosamine-1-P transferase; transfers Glc-Nac-P from UDP-GlcNac to Dol-P in the ER in the first step of the dolichol pathway of protein asparagine-linked glycosylation; inhibited by tunicamycin; human homolog DPAGT1 can complement yeast ALG7 mutant
YBR244W	GPX2	2	707528	708016	W	glutathione peroxidase GPX2|AMI1	6.01747	462.5		213.2		Phospholipid hydroperoxide glutathione peroxidase; protects cells from phospholipid hydroperoxides and nonphospholipid peroxides during oxidative stress; induced by glucose starvation; protein abundance increases in response to DNA replication stress
YBR245C	ISW1	2	708150	711539	C	chromatin-remodeling ATPase ISW1|SGN2	5.29754	208.5		170.5		ATPase subunit of imitation-switch (ISWI) class chromatin remodelers; with Ioc3p forms Isw1a complex involved in repression of transcription initiation; with Ioc2p and Ioc4p forms Isw1b complex involved in regulation of transcription elongation; Isw1b recruited to ORFs by H3K36 methylation and acts with Chd1p to prevent trans-histone exchange over coding regions; Isw1p import into nucleus depends…
YBR246W	RRT2	2	711591	712754	W	DPH7|diphthamide synthase|ERE1	6.06069					Methylesterase performing penultimate step of diphthamide biosynthesis; hydrolyzes methylated diphthine to produce diphthine and allows Dph6-catalyzed amidation reaction to occur; deletion leads to resistance to sordarin and accumulation of methylatediphthine; WD40 domain-containing protein; involved in endosomal recycling; forms complex with Rtt10p that functions in retromer-mediated pathway for…
YBR247C	ENP1	2	713004	714455	C	snoRNA-binding rRNA-processing protein ENP1|MEG1	6.5949	402			Failed_QC	Protein associated with U3 and U14 snoRNAs; required for pre-rRNA processing and 40S ribosomal subunit synthesis; localized in the nucleus and concentrated in the nucleolus; human BYSL functionally complements the heat sensitivity of an enp1 ts mutant
YBR248C	HIS7	2	714807	716465	C	imidazoleglycerol-phosphate synthase	7.22857	600		1090.5		Imidazole glycerol phosphate synthase; glutamine amidotransferase:cyclase that catalyzes the fifth step of histidine biosynthesis and also produces 5-aminoimidazole-4-carboxamide ribotide (AICAR), a purine precursor
YBR249C	ARO4	2	716882	717994	C	3-deoxy-7-phosphoheptulonate synthase ARO4	8.17352	1945.5		3767.5		3-deoxy-D-arabino-heptulosonate-7-phosphate (DAHP) synthase; catalyzes the first step in aromatic amino acid biosynthesis and is feedback-inhibited by tyrosine or high concentrations of phenylalanine or tryptophan; relative distribution to the nucleus increases upon DNA replication stress
YBR250W	SPO23	2	719033	720604	W		1.18873					Protein of unknown function; associates with meiosis-specific protein Spo1p
YBR251W	MRPS5	2	721390	722313	W	mitochondrial 37S ribosomal protein MRPS5	5.92698	67.5		106.5		Mitochondrial ribosomal protein of the small subunit
YBR252W	DUT1	2	722611	723054	W	bifunctional dITP/dUTP diphosphatase	7.36018	182		173.2		Deoxyuridine triphosphate diphosphatase (dUTPase); catalyzes hydrolysis of dUTP to dUMP and PPi, thereby preventing incorporation of uracil into DNA during replication; critical for the maintenance of genetic stability; also has diphosphatase activity on deoxyinosine triphosphate; human homolog DUT allows growth of yeast haploid dut1 null mutant after sporulation of heterozygous diploid
YBR253W	SRB6	2	723270	723635	W	MED22	6.51324	92		49.7		Subunit of the RNA polymerase II mediator complex; associates with core polymerase subunits to form the RNA polymerase II holoenzyme; essential for transcriptional regulation
YBR254C	TRS20	2	723736	724263	C	TRAPP subunit TRS20	6.07464	63.5			Abundance_Low	Core component of transport protein particle (TRAPP) complexes I-III; TRAPPs are multimeric guanine nucleotide-exchange factors for GTPase Ypt1p, regulating ER-Golgi traffic (TRAPPI), intra-Golgi traffic (TRAPPII), endosome-Golgi traffic (TRAPPII and III) and autophagy (TRAPPIII); mutation leads to defects in endocytic recycling, block in sporulation/meiosis; mutations in human homolog TRAPPC2 ca…
YBR255C-A	RCF3	2	726618	727074	C							Putative protein of unknown function; may interact with respiratory chain complexes III (ubiquinol-cytochrome c reductase) or IV (cytochrome c oxidase); identified by sequence comparison with hemiascomycetous yeast species
YBR255W	MTC4	2	724456	726540	W		4.87358		Abundance_Low		Abundance_Low	Protein of unknown function; required for normal growth rate at 15 degrees C; green fluorescent protein (GFP)-fusion protein localizes to the cytoplasm in a punctate pattern; mtc4 is synthetically sick with cdc13-1
YBR256C	RIB5	2	727386	728102	C	riboflavin synthase	7.7994		Abundance_Low		Abundance_Low	Riboflavin synthase; catalyzes the last step of the riboflavin biosynthesis pathway
YBR257W	POP4	2	728885	729724	W	RNase P/RNase MRP complex subunit	5.37472					Subunit of both RNase MRP and nuclear RNase P; RNase MRP cleaves pre-rRNA, while nuclear RNase P cleaves tRNA precursors to generate mature 5' ends and facilitates turnover of nuclear RNAs; binds to the RPR1 RNA subunit in RNase P
YBR258C	SHG1	2	729734	730162	C	CPS15	4.76607		Failed_QC	135.2		Subunit of the COMPASS (Set1C) complex; COMPASS methylates histone H3 on lysine 4 and is required in transcriptional silencing near telomeres
YBR259W	YBR259W	2	730387	732453	W		4.24664		Abundance_Low		Abundance_Low	Protein of unknown function; YBR259W is not an essential gene; forms cytoplasmic foci upon DNA replication stress
YBR260C	RGD1	2	732639	734639	C		5.21138	113		108.5		GTPase-activating protein (RhoGAP) for Rho3p and Rho4p; possibly involved in control of actin cytoskeleton organization
YBR261C	TAE1	2	734832	735530	C	N-terminal protein methyltransferase|NTM1	6.57965		Abundance_Low	59.5		AdoMet-dependent proline methyltransferase; catalyzes the dimethylation of ribosomal proteins Rpl12 and Rps25 at N-terminal proline residues; has a role in protein synthesis; fusion protein localizes to the cytoplasm
YBR262C	MIC12	2	735720	736040	C	AIM5|MCS12|FMP51	7.21674	177.5		152.8		Component of the MICOS complex; MICOS (formerly MINOS or MitOS) is a mitochondrial inner membrane complex that extends into the intermembrane space and has a role in the maintenance of crista junctions, inner membrane architecture, and formation of contact sites to the outer membrane; forms a subcomplex with Mic10p and Mic27p whose assembly and stability requires cardiolipin
YBR263W	SHM1	2	736264	737736	W	glycine hydroxymethyltransferase SHM1|TMP3|SHMT1	6.6808	202.5		228		Mitochondrial serine hydroxymethyltransferase; converts serine to glycine plus 5,10 methylenetetrahydrofolate; involved in generating precursors for purine, pyrimidine, amino acid, and lipid biosynthesis; reverse reaction generates serine
YBR264C	YPT10	2	737770	738369	C	Rab family GTPase YPT10	5.98402		Abundance_Low		Abundance_Low	Rab family GTP-binding protein; contains the PEST signal sequence specific for proteolytic enzymes; may be involved in vesicular transport; overexpression leads to accumulation of Golgi-like cisternae with budding vesicles
YBR265W	TSC10	2	738582	739544	W	3-dehydrosphinganine reductase	6.91089	109		76		3-ketosphinganine reductase; catalyzes the second step in phytosphingosine synthesis; essential for growth in the absence of exogenous dihydrosphingosine or phytosphingosine; localized to lipid droplets; member of short chain dehydrogenase/reductase protein family
YBR266C	SLM6	2	739936	740388	C							Protein with a potential role in actin cytoskeleton organization; gene exhibits synthetic genetic interaction with MSS4 encoding phosphatidylinositol 4-phosphate kinase
YBR267W	REI1	2	739841	741022	W		6.94753	451.5		313.5		Cytoplasmic pre-60S factor; required for the correct recycling of shuttling factors Alb1, Arx1 and Tif6 at the end of the ribosomal large subunit biogenesis; involved in bud growth in the mitotic signaling network
YBR268W	MRPL37	2	741299	741616	W	mitochondrial 54S ribosomal protein YmL37|YmL37	7.10415	108		202.7		Mitochondrial ribosomal protein of the large subunit
YBR269C	SDH8	2	742160	742576	C	FMP21	7.27226	53		150.6		Protein required for assembly of succinate dehydrogenase; interacts with flavinylated Sdh1p and may function as a chaperone for free Sdh1p, protecting its FAD cofactor from redox reactions before assembly of the complex; soluble protein of the mitochondrial matrix; respiratory defect of null mutant is functionally complemented by Drosophila and human orthologs
YBR270C	BIT2	2	742761	744398	C		4.14661					Subunit of TORC2 membrane-associated complex; involved in regulation of actin cytoskeletal dynamics during polarized growth and cell wall integrity; interacts with Slm1p and Slm2p, homologous PH domain-containing TORC2 substrates; BIT2 has a paralog, BIT61, that arose from the whole genome duplication
YBR271W	EFM2	2	744852	746111	W	S-adenosylmethionine-dependent methyltransferase	5.46302		Abundance_Low		Abundance_Low	S-adenosylmethionine-dependent methyltransferase; seven-beta-strand lysine methyltransferase which dimethylates translation elongation factor EF2 (Eft1p and Eft2p) at lysine 613 and methylates EF3 (Yef3p) at lysine 187; green fluorescent protein (GFP)-fusion protein localizes to the cytoplasm; involved in regulation of translational termination; predicted involvement in ribosome biogenesis
YBR272C	HSM3	2	746361	747803	C		5.48	56			Abundance_Low	Evolutionarily conserved 19S regulatory particle assembly-chaperone; involved in the assembly of the base subcomplex of the 19S proteasomal regulatory particle (RP); involved in DNA mismatch repair during slow growth; weak similarity to Msh1p; structural study suggests Hsm3p is a scaffold protein for Rpt1p-Rpt2p complex formation; ortholog of human 19S subunit S5b
YBR273C	UBX7	2	748061	749371	C	CUI3	5.86873		Abundance_Low		Abundance_Low	UBX (ubiquitin regulatory X) domain-containing protein; interacts with Cdc48p; UBX7 has a paralog, UBX6, that arose from the whole genome duplication
YBR274W	CHK1	2	749594	751177	W	serine/threonine protein kinase CHK1	4.72652		Abundance_Low		Abundance_Low	Serine/threonine kinase and DNA damage checkpoint effector; mediates cell cycle arrest via phosphorylation of Pds1p; phosphorylated by checkpoint signal transducer Mec1p; homolog of S. pombe and mammalian Chk1 checkpoint kinase
YBR275C	RIF1	2	751356	757106	C	DNA-binding protein RIF1	4.36274		Abundance_Low		Abundance_Low	Protein that binds to the Rap1p C-terminus; acts synergistically with Rif2p to help control telomere length and establish telomeric silencing; involved in control of DNA replication; contributes to resection of DNA double strand breaks (DSBs); deletion results in telomere elongation
YBR276C	PPS1	2	757620	760043	C	tyrosine/serine/threonine protein phosphatase PPS1	5.69322					Protein phosphatase; has specificity for serine, threonine, and tyrosine residues; has a role in the DNA synthesis phase of the cell cycle
YBR277C	YBR277C	2	760215	760616	C							Dubious open reading frame; unlikely to encode a functional protein, based on available experimental and comparative sequence data; partially overlaps the verified gene YBR278W
YBR278W	DPB3	2	760294	760899	W	DNA polymerase epsilon noncatalytic subunit	5.53194		Abundance_Low		Abundance_Low	Third-largest subunit of DNA polymerase II (DNA polymerase epsilon); required to maintain fidelity of chromosomal replication and also for inheritance of telomeric silencing; stabilizes the interaction of Pol epsilon with primer-template DNA, positively affecting the processivity of the polymerase and exonuclease activities of Pol epsilon; mRNA abundance peaks at the G1/S boundary of the cell cyc…
YBR279W	PAF1	2	761257	762594	W		6.98673	282.5		197		Component of the Paf1p complex involved in transcription elongation; binds to and modulates the activity of RNA polymerases I and II; required for expression of a subset of genes, including cell cycle-regulated genes; involved in SER3 repression by helping to maintain SRG1 transcription-dependent nucleosome occupancy; homolog of human PD2/hPAF1
YBR280C	SAF1	2	762784	764697	C	SCF ubiquitin ligase complex subunit SAF1	3.64728					F-Box protein involved in proteasome-dependent degradation of Aah1p; involved in proteasome-dependent degradation of Aah1p during entry of cells into quiescence; interacts with Skp1
YBR281C	DUG2	2	764970	767606	C	glutamine amidotransferase subunit DUG2	4.66671		Abundance_Low		Abundance_Low	Component of glutamine amidotransferase (GATase II); forms a complex with Dug3p to degrade glutathione (GSH) and other peptides containing a gamma-glu-X bond in an alternative pathway to GSH degradation by gamma-glutamyl transpeptidase (Ecm38p)
YBR282W	MRPL27	2	768240	768680	W	mitochondrial 54S ribosomal protein YmL27|YmL27	6.53885	86		114.2		Mitochondrial ribosomal protein of the large subunit; homolog of human Bcl-2 interacting protein BMRP
YBR283C	SSH1	2	768943	770415	C		7.57529	1496		947.5		Subunit of the Ssh1 translocon complex; Sec61p homolog involved in co-translational pathway of protein translocation; not essential
YBR284W	YBR284W	2	771239	773632	W	metallo-dependent hydrolase superfamily protein	1.67236					Putative metallo-dependent hydrolase superfamily protein; similar to AMP deaminases but lacks key catalytic residues and does not rescue purine nucleotide metabolic defect of quadruple aah1 ade8 amd1 his1 mutant; null mutant exhibits longer telomeres, altered Ty mobility, decreased resistance to rapamycin and wortmannin; induced in response to hydrostatic pressure; not an essential gene; YBR284W …
YBR285W	YBR285W	2	773922	774356	W		3.87739					Putative protein of unknown function; YBR285W is not an essential gene
YBR286W	APE3	2	774700	776313	W	APY1	8.93062		Abundance_Low		Abundance_Low	Vacuolar aminopeptidase Y; processed to mature form by Prb1p
YBR287W	YBR287W	2	776571	777854	W	ZSP1	7.03349	186.5		78.5		Protein of unknown function; green fluorescent protein (GFP)-fusion protein localizes to the ER; YBR287W is not an essential gene
YBR288C	APM3	2	778012	779463	C	YKS6	5.89699	63		56		Mu3-like subunit of the clathrin associated protein complex (AP-3); functions in transport of alkaline phosphatase to the vacuole via the alternate pathway
YBR289W	SNF5	2	779667	782384	W	TYE4|SWI10|HAF4	4.92434		Abundance_Low	52.5		Subunit of the SWI/SNF chromatin remodeling complex; involved in transcriptional regulation; functions interdependently in transcriptional activation with Snf2p and Snf6p; relocates to the cytosol under hypoxic conditions
YBR290W	BSD2	2	782591	783556	W		6.51195	137		87.5		Heavy metal ion homeostasis protein; facilitates trafficking of Smf1p and Smf2p metal transporters to vacuole where they are degraded; acts as an adaptor protein with Rsp5p in the regulated endocytosis of Smf1p and is itself ubiquitylated by Rsp5p; controls metal ion transport, prevents metal hyperaccumulation, functions in copper detoxification
YBR291C	CTP1	2	783673	784572	C		7.64051		Abundance_Low	199		Mitochondrial inner membrane citrate transporter; member of the mitochondrial carrier family
YBR292C	YBR292C	2	784702	785073	C							Dubious open reading frame; unlikely to encode a functional protein, based on available experimental and comparative sequence data; YBR292C is not an essential gene
YBR293W	VBA2	2	787006	788430	W		4.97199					Permease of basic amino acids in the vacuolar membrane
YBR294W	SUL1	2	789235	791814	W	sulfate permease|SFP2	5.32072					High affinity sulfate permease of the SulP anion transporter family; sulfate uptake is mediated by specific sulfate transporters Sul1p and Sul2p, which control the concentration of endogenous activated sulfate intermediates
YBR295W	PCA1	2	792849	796499	W	cation-transporting P-type ATPase PCA1|PAY2|CAD2	4.07304					Cadmium transporting P-type ATPase; may also have a role in copper and iron homeostasis; stabilized by Cd binding, which prevents ubiquitination; S288C and other lab strains contain a G970R mutation which eliminates Cd transport function
YBR296C	PHO89	2	796798	798522	C	ITN1			Abundance_Low		Abundance_Low	Plasma membrane Na+/Pi cotransporter; active in early growth phase; similar to phosphate transporters of Neurospora crassa; transcription regulated by inorganic phosphate concentrations and Pho4p; mutations in related human transporter genes hPit1 and hPit2 are associated with hyperphosphatemia-induced calcification of vascular tissue and familial idiopathic basal ganglia calcification
YBR296C-A	YBR296C-A	2	800123	800242	C							Putative protein of unknown function; identified by gene-trapping, microarray-based expression analysis, and genome-wide homology searching
YBR297W	MAL33	2	800523	801929	W	transcription factor MAL33|MALR|MAL3R	3.05122					MAL-activator protein; part of complex locus MAL3; nonfunctional in genomic reference strain S288C
YBR298C	MAL31	2	802631	804475	C	maltose permease|MALT|MAL3T	3.83285					Maltose permease; high-affinity maltose transporter (alpha-glucoside transporter); encoded in the MAL3 complex locus; member of the 12 transmembrane domain superfamily of sugar transporters; functional in genomic reference strain S288C
YBR298C-A	YBR298C-A	2	805035	805256	C							Putative protein of unknown function; identified by gene-trapping, microarray-based expression analysis, and genome-wide homology searching
YBR299W	MAL32	2	805351	807105	W	alpha-glucosidase MAL32|MALS|MAL3S	1.44471					Maltase (alpha-D-glucosidase); inducible protein involved in maltose catabolism; encoded in the MAL3 complex locus; functional in genomic reference strain S288C; hydrolyzes the disaccharides maltose, turanose, maltotriose, and sucrose
YBR300C	YBR300C	2	808600	809097	C							Dubious open reading frame; unlikely to encode a functional protein, based on available experimental and comparative sequence data; partially overlaps the verified gene YBR301W; YBR300C is not an essential gene
YBR301W	PAU24	2	809057	809419	W	seripauperin PAU24|DAN3						Cell wall mannoprotein; has similarity to Tir1p, Tir2p, Tir3p, and Tir4p; member of the seripauperin multigene family encoded mainly in subtelomeric regions; expressed under anaerobic conditions, completely repressed during aerobic growth
YBR302C	COS2	2	810340	811479	C		5.43349		Abundance_Low		Abundance_Low	Endosomal protein involved in turnover of plasma membrane proteins; member of the DUP380 subfamily of conserved, often subtelomeric COS genes; required for the multivesicular vesicle body sorting pathway that internalizes plasma membrane proteins for degradation; Cos proteins provide ubiquitin in trans for nonubiquitinated cargo proteins
YCL001W	RER1	3	111916	112482	W	protein retrieval receptor	7.82991	206		91.5		Protein involved in retention of membrane proteins; including Sec12p, in the ER; localized to Golgi; functions as a retrieval receptor in returning membrane proteins to the ER
YCL001W-A	YCL001W-A	3	113080	113541	W							Putative protein of unknown function; YCL001W-A gene has similarity to DOM34 and is present in a region duplicated between chromosomes XIV and III
YCL001W-B	YCL001W-B	3	113770	114024	W							Putative protein of unknown function; present in a region duplicated between chromosomes XIV and III; YCL001W-B has a paralog, DOM34, that arose from the whole genome duplication
YCL002C	YCL002C	3	110808	111675	C		5.5397					Putative protein of unknown function; YCL002C is not an essential gene
YCL004W	PGS1	3	109105	110670	W	CDP-diacylglycerol--glycerol-3-phosphate 3-phosphatidyltransferase|YCL003W|PEL1	4.35076					Phosphatidylglycerolphosphate synthase; catalyzes the synthesis of phosphatidylglycerolphosphate from CDP-diacylglycerol and sn-glycerol 3-phosphate in the first committed and rate-limiting step of cardiolipin biosynthesis
YCL005W	LDB16	3	108021	108791	W		5.58865		Abundance_Low		Abundance_Low	Protein involved in lipid droplet (LD) assembly; forms a complex with Sei1p at ER-LD contact sites, stabilizing contact sites; ensures that LDs bud from the ER towards the cytosolic side of the membrane; null mutants have decreased net negative cell surface charge and localized accumulation of phosphatidic acid (PA) marker proteins; GFP-fusion protein expression is induced in response to MMS; nul…
YCL005W-A	VMA9	3	107023	107417	W	H(+)-transporting V0 sector ATPase subunit e|LDB10|CWH36						Vacuolar H+ ATPase subunit e of the V-ATPase V0 subcomplex; essential for vacuolar acidification; interacts with the V-ATPase assembly factor Vma21p in the ER; involved in V0 biogenesis
YCL007C	YCL007C	3	106974	107366	C	CWH36						Dubious open reading frame; unlikely to encode a functional protein, based on available experimental and comparative sequence data; overlaps verified ORF YCL005W-A; mutations in YCL007C were thought to confer sensitivity to calcofluor white, but this phenotype was later shown to be due to the defect in YCL005W-A
YCL008C	STP22	3	105696	106853	C	ubiquitin-binding ESCRT-I subunit protein STP22|AGS1|VPL15|VPS23	5.65222					Component of the ESCRT-I complex; ESCRT-I is involved in ubiquitin-dependent sorting of proteins into the endosome; prevents polyubiquitination of the arrestin-related protein Rim8p, thereby directing its monoubiquitination by Rsp5p; homologous to the mouse and human Tsg101 tumor susceptibility gene; mutants exhibit a Class E Vps phenotype;
YCL009C	ILV6	3	104619	105548	C	acetolactate synthase regulatory subunit	8.89742	528		1045		Regulatory subunit of acetolactate synthase; acetolactate synthase catalyzes the first step of branched-chain amino acid biosynthesis; enhances activity of the Ilv2p catalytic subunit, localizes to mitochondria
YCL010C	SGF29	3	103571	104350	C		6.15236	106.5		79		Component of the HAT/Core module of the SAGA, SLIK, and ADA complexes; HAT/Core module also contains Gcn5p, Ngg1p, and Ada2p; binds methylated histone H3K4; involved in transcriptional regulation through SAGA and TBP recruitment to target promoters and H3 acetylation
YCL011C	GBP2	3	102075	103358	C	single-stranded telomeric DNA-binding/mRNA-binding protein|RLF6	8.02088	85.5		74.5		Poly(A+) RNA-binding protein; key surveillance factor for the selective export of spliced mRNAs from the nucleus to the cytoplasm; preference for intron-containing genes; similar to Npl3p; also binds single-stranded telomeric repeat sequence in vitro; relocalizes to the cytosol in response to hypoxia; GBP2 has a paralog, HRB1, that arose from the whole genome duplication
YCL012C	YCL012C	3	101317	101788	C	YCL011C-A	6.34097					Protein of unknown function; SWAT-GFP and mCherry fusion proteins localize to the endoplasmic reticulum and vacuole respectively; orthologs are present in S. bayanus, S. paradoxus and Ashbya gossypii; YCL012C is not an essential gene
YCL014W	BUD3	3	96281	101191	W	YCL012W	3.94126		Abundance_Low		Abundance_Low	Guanine nucleotide exchange factor (GEF) for Cdc42p; activates Cdc42p in early G1, accounting for the first stage of biphasic activation, with Cdc24p accounting for the second stage in late G1; involved in the Cdc42p-mediated assembly of the axial landmark that dictates the site for the next round of budding, resulting in the axial budding pattern observed in haploids; localizes with septins to t…
YCL016C	DCC1	3	94621	95763	C		4.9559		Abundance_Low		Abundance_Low	Subunit of a complex with Ctf8p and Ctf18p; shares some components with Replication Factor C; required for sister chromatid cohesion and telomere length maintenance
YCL017C	NFS1	3	92777	94270	C	SPL1	6.53048	537.5		548.5		Cysteine desulfurase; involved in iron-sulfur cluster (Fe/S) biogenesis and in thio-modification of mitochondrial and cytoplasmic tRNAs; essential protein located predominantly in mitochondria
YCL018W	LEU2	3	91324	92418	W	3-isopropylmalate dehydrogenase	8.99757					Beta-isopropylmalate dehydrogenase (IMDH); catalyzes the third step in the leucine biosynthesis pathway; can additionally catalyze the conversion of beta-ethylmalate into alpha-ketovalerate
YCL021W-A	YCL021W-A	3	83620	83997	W							Putative protein of unknown function; SWAT-GFP and mCherry fusion proteins localize to the vacuole
YCL022C	YCL022C	3	81570	82085	C							Dubious open reading frame; unlikely to encode a functional protein, based on available experimental and comparative sequence data; completely overlaps verified gene KCC4/YCL024W
YCL023C	YCL023C	3	78949	79296	C							Dubious open reading frame; unlikely to encode a functional protein, based on available experimental and comparative sequence data; partially overlaps verified ORF KCC4
YCL024W	KCC4	3	79162	82275	W	serine/threonine protein kinase	4.49491		Abundance_Low		Abundance_Low	Protein kinase of the bud neck involved in the septin checkpoint; associates with septin proteins, negatively regulates Swe1p by phosphorylation, shows structural homology to bud neck kinases Gin4p and Hsl1p; KCC4 has a paralog, GIN4, that arose from the whole genome duplication
YCL025C	AGP1	3	76018	77919	C	amino acid transporter AGP1|YCC5	3.82682	550		3035.5		Low-affinity amino acid permease with broad substrate range; involved in uptake of asparagine, glutamine, and other amino acids; expression regulated by SPS plasma membrane amino acid sensor system (Ssy1p-Ptr3p-Ssy5p); AGP1 has a paralog, GNP1, that arose from the whole genome duplication
YCL026C-A	FRM2	3	74704	75285	C	type II nitroreductase|YCLX08C			Abundance_Low		Failed_QC/Abundance_Low	Type II nitroreductase, using NADH as reductant; mutants are defective in fatty acid mediated repression of genes involved in fatty acid biosynthesis indicative of a role in lipid signaling; involved in the oxidative stress response; transcription induction by cadmium and selenite indicates a possible role in the metal stress response; expression induced in cells treated with the mycotoxin patulin
YCL026C-B	HBN1	3	73405	73986	C	putative nitroreductase|YCL027C-A			No_Measurement
YCL027W	FUS1	3	71803	73341	W		3.5094		Abundance_Low		Abundance_Low	Membrane protein localized to the shmoo tip; required for cell fusion; expression regulated by mating pheromone; proposed to coordinate signaling, fusion, and polarization events required for fusion; potential Cdc28p substrate
YCL028W	RNQ1	3	70150	71367	W	prion domain-containing protein RNQ1|[PIN(+)]	6.91468	259.5		244.5		[PIN(+)] prion; an infectious protein conformation that is generally an ordered protein aggregate
YCL029C	BIK1	3	68599	69921	C	PAC14|ARM5	5.43971		Abundance_Low		Abundance_Low	Microtubule-associated protein; component of the interface between microtubules and kinetochore, involved in sister chromatid separation; essential in polyploid cells but not in haploid or diploid cells; ortholog of mammalian CLIP-170
YCL030C	HIS4	3	65934	68333	C	trifunctional histidinol dehydrogenase/phosphoribosyl-AMP cyclohydrolase/phosphoribosyl-ATP diphosphatase	8.17271	2089		9750		Multifunctional enzyme containing phosphoribosyl-ATP pyrophosphatase; phosphoribosyl-AMP cyclohydrolase, and histidinol dehydrogenase activities; catalyzes the second, third, ninth and tenth steps in histidine biosynthesis
YCL031C	RRP7	3	64675	65568	C		7.26435	339		353		Essential protein involved in rRNA processing and ribosome biogenesis; protein abundance increases in response to DNA replication stress
YCL032W	STE50	3	63441	64481	W		5.47291		Abundance_Low		Abundance_Low	Adaptor protein for various signaling pathways; involved in mating response, invasive/filamentous growth, osmotolerance; acts as an adaptor that links G protein-associated Cdc42p-Ste20p complex to the effector Ste11p to modulate signal transduction
YCL033C	MXR2	3	62776	63282	C	MSRB	6.42533					Methionine-R-sulfoxide reductase; involved in the response to oxidative stress; protects iron-sulfur clusters from oxidative inactivation along with MXR1; involved in the regulation of lifespan
YCL034W	LSB5	3	61658	62722	W		7.0536		Abundance_Low	69.5		Protein involved in membrane-trafficking events at plasma membrane; interacts with actin regulators Sla1p and Las17p, ubiquitin, Arf3p to couple actin dynamics to membrane trafficking processes; similar structure to GGA family of proteins with N-terminal VHS domain and GAT domain; binds Las17p, which is homolog of human Wiskott-Aldrich Syndrome protein involved in actin patch assembly, actin poly…
YCL035C	GRX1	3	60841	61173	C	dithiol glutaredoxin GRX1	9.23045	506		515.8		Glutathione-dependent disulfide oxidoreductase; hydroperoxide and superoxide-radical responsive, heat-stable, with active site cysteine pair; protects cells from oxidative damage; GRX1 has a paralog, GRX2, that arose from the whole genome duplication; protein abundance increases in response to DNA replication stress
YCL036W	GFD2	3	59026	60726	W	YCD6	5.73333					Protein of unknown function; identified as a high-copy suppressor of a dbp5 mutation; GFD2 has a paralog, YDR514C, that arose from the whole genome duplication
YCL037C	SRO9	3	57374	58678	C		4.13639	3260		1998		Cytoplasmic RNA-binding protein; shuttles between nucleus and cytoplasm and is exported from the nucleus in an mRNA export-dependent manner; associates with translating ribosomes; involved in heme regulation of Hap1p as a component of the HMC complex, also involved in the organization of actin filaments; contains a La motif; SRO9 has a paralog, SLF1, that arose from the whole genome duplication
YCL038C	ATG22	3	54941	56527	C	AUT4	4.51917					Vacuolar integral membrane protein required for efflux of amino acids; required for efflux of amino acids during autophagic body breakdown in the vacuole; null mutation causes a gradual loss of viability during starvation
YCL039W	GID7	3	52645	54882	W	glucose-induced degradation complex subunit GID7|MOH2	4.63691		Abundance_Low		Abundance_Low	Subunit of GID Complex that binds directly to central component Vid30p; GID complex is involved in proteasome-dependent catabolite inactivation of fructose-1,6-bisphosphatase; Gid7p contains six WD40 repeats; computational analysis suggests that Gid7p and Moh1p have similar functions
YCL040W	GLK1	3	50838	52340	W	glucokinase|HOR3	7.47982	145.5		332.5		Glucokinase; catalyzes the phosphorylation of glucose at C6 in the first irreversible step of glucose metabolism; one of three glucose phosphorylating enzymes; expression regulated by non-fermentable carbon sources; GLK1 has a paralog, EMI2, that arose from the whole genome duplication
YCL041C	YCL041C	3	50133	50627	C		5.69812					Dubious open reading frame; unlikely to encode a functional protein, based on available experimental and comparative sequence data; partially overlaps both the verified gene PDI1/YCL043C and the uncharacterized gene YCL042W
YCL042W	YCL042W	3	50584	50943	W		5.50051					Putative protein of unknown function; epitope-tagged protein localizes to the cytoplasm
YCL043C	PDI1	3	48653	50221	C	protein disulfide isomerase PDI1|TRG1|MFP1	9.39956	407		220		Protein disulfide isomerase; multifunctional oxidoreductase of the ER lumen, essential for disulfide bond formation in secretory and cell-surface proteins, processing of non-native disulfide bonds; Ero1p activator; complexes with exomannosidase, Mnl1p to facilitate the recognition of misfolded glycoproteins and the trimming of glycan Man8GlcNAc2 to Man7GlcNAc2 on substrates, thereby accelerating …
YCL044C	MGR1	3	47111	48364	C		5.82511		Failed_QC		Abundance_Low	Subunit of the mitochondrial (mt) i-AAA protease supercomplex; i-AAA degrades misfolded mitochondrial proteins; forms a subcomplex with Mgr3p that binds to substrates to facilitate proteolysis; required for growth of cells lacking mtDNA
YCL045C	EMC1	3	44623	46905	C		6.60346	525		346.7		Member of conserved endoplasmic reticulum membrane complex; involved in efficient folding of proteins in the ER; null mutant displays induction of the unfolded protein response; interacts with Gal80p; homologous to worm H17B01.4/EMC-1, fly CG2943, and human KIAA0090
YCL046W	YCL046W	3	46640	46963	W							Dubious open reading frame; unlikely to encode a functional protein, based on available experimental and comparative sequence data; partially overlaps the uncharacterized ORF YCL045C
YCL047C	POF1	3	43661	44437	C	nicotinamide-nucleotide adenylyltransferase	5.52912					Nicotinamide mononucleotide-specific adenylyltransferase (NMNAT); catalyzes the conversion of nicotinamide mononucleotide (NMN) to nicotinamide adenine dinucleotide (NAD+); role in the nicotinamide riboside (NR) salvage pathway of NAD+ biosynthesis; involved in NR and NAD+ homeostasis; ATPase involved in protein quality control and filamentation pathways; interacts physically with Kss1p and suppr…
YCL048W	SPS22	3	42165	43556	W							Protein of unknown function; SPS22 has a paralog, SPS2, that arose from the whole genome duplication; redundant with Sps2p for the organization of the beta-glucan layer of the spore wall
YCL048W-A	YCL048W-A	3	41488	41727	W							Putative protein of unknown function; SWAT-GFP and mCherry fusion proteins localize to the cell periphery and vacuole; YCL048W-A has a paralog, YDR524C-B, that arose from the whole genome duplication
YCL049C	YCL049C	3	39786	40724	C		4.9559					Protein of unknown function; localizes to membrane fraction; YCL049C is not an essential gene
YCL050C	APA1	3	37836	38801	C	bifunctional AP-4-A phosphorylase/ADP sulfurylase|DTP1	7.372	1060		592.5		AP4A phosphorylase; bifunctional diadenosine 5',5'''-P1,P4-tetraphosphate phosphorylase and ADP sulfurylase involved in catabolism of bis(5'-nucleosidyl) tetraphosphates; catalyzes phosphorolysis of dinucleoside oligophosphates, cleaving substrates' alpha/beta-anhydride bond and introducing Pi into the beta-position of the corresponding NDP formed; protein abundance increases under DNA replicatio…
YCL051W	LRE1	3	35865	37616	W		5.05569					Protein involved in control of cell wall structure and stress response; direct inhibitor of the nuclear Dbf2 related (NDR) kinase Cbk1p-Mob2p; overproduction confers resistance to cell-wall degrading enzymes; exhibits genetic interactions with genes involved in the cell wall integrity pathway; LRE1 has a paralog, HLR1, that arose from the whole genome duplication
YCL052C	PBN1	3	34143	35393	C		6.30662	83.5		65.5		Component of glycosylphosphatidylinositol-mannosyltransferase I; essential component; required for the autocatalytic post-translational processing of the protease B precursor Prb1p; localizes to ER in lumenal orientation; homolog of mammalian PIG-X
YCL054W	SPB1	3	31449	33974	W	27S pre-rRNA (guanosine2922-2'-O)-methyltransferase	6.69344					AdoMet-dependent methyltransferase; involved in rRNA processing and 60S ribosomal subunit maturation; methylates G2922 in the tRNA docking site of the large subunit rRNA and in the absence of snR52, U2921; suppressor of PAB1 mutants
YCL054W-A	RDT1	3	30910	30996	W							Short open reading frame, shows evidence of translation; may be new protein-coding gene that originated de novo from noncoding sequence; same allele found in at least 33 other S. cerevisiae strains; at least 3 strains have a second allele with three nucleotide substitutions leading to two amino acid differences
YCL055W	KAR4	3	27929	28936	W		5.84202	123		83		Transcription factor required for response to pheromones; also required during meiosis; exists in two forms, a slower-migrating form more abundant during vegetative growth and a faster-migrating form induced by pheromone
YCL056C	PEX34	3	26925	27359	C		5.86954		Abundance_Low		Abundance_Low	Protein that regulates peroxisome populations; peroxisomal integral membrane protein; interacts with Pex11p, Pex25p, and Pex27p to control both constitutive peroxisome division and peroxisome morphology and abundance during peroxisome proliferation
YCL057C-A	MIC10	3	24032	24325	C	MOS1|MCS10|MIO10						Conserved component of the MICOS complex; MICOS (formerly MINOS or MitOS) is a mitochondrial inner membrane complex that extends into the intermembrane space and has a role in the maintenance of crista junctions, inner membrane architecture, and formation of contact sites to the outer membrane; forms a subcomplex with Mic12p and Mic27p whose assembly and stability requires cardiolipin; homo-oligo…
YCL057W	PRD1	3	24768	26906	W	metalloendopeptidase	6.49825	395		369		Zinc metalloendopeptidase; found in the cytoplasm and intermembrane space of mitochondria; with Cym1p, involved in degradation of mitochondrial proteins and of presequence peptides cleaved from imported proteins; protein abundance increases in response to DNA replication stress
YCL058C	FYV5	3	23523	23981	C	MDF1	2.13118					Protein involved in regulation of the mating pathway; binds with Matalpha2p to promoters of haploid-specific genes; required for survival upon exposure to K1 killer toxin; involved in ion homeostasis
YCL058W-A	ADF1	3	23584	23925	W							Transcriptional repressor encoded by the FYV5 antisense strand; negatively regulates transcription of FYV5 by binding to the promoter on the sense strand
YCL059C	KRR1	3	22429	23379	C	ribosome biosynthesis protein KRR1	7.12871	376		210		Nucleolar protein required for rRNA synthesis and ribosomal assembly; required for the synthesis of 18S rRNA and for the assembly of 40S ribosomal subunit; essential gene
YCL061C	MRC1	3	18816	22106	C	chromatin-modulating protein MRC1|YCL060C	4.71239		Abundance_Low		Abundance_Low	S-phase checkpoint protein required for DNA replication; couples DNA helicase and polymerase; interacts with and stabilizes Pol2p at stalled replication forks during stress, where it forms a pausing complex with Tof1p and is phosphorylated by Mec1p; defines a novel S-phase checkpoint with Hog1p that coordinates DNA replication and transcription upon osmostress; protects uncapped telomeres; Dia2p-…
YCL063W	VAC17	3	17290	18561	W	YCL062W	5.21336					Phosphoprotein involved in vacuole inheritance; degraded in late M phase of the cell cycle; acts as a vacuole-specific receptor for myosin Myo2p; involved in regulation of asymmetric inheritance of aggregated/misfolded proteins and age reset
YCL064C	CHA1	3	15798	16880	C	L-serine/L-threonine ammonia-lyase CHA1	2.63963	1002.5			Abundance_Low	Catabolic L-serine (L-threonine) deaminase; catalyzes the degradation of both L-serine and L-threonine; required to use serine or threonine as the sole nitrogen source, transcriptionally induced by serine and threonine
YCL065W	YCL065W	3	13751	14119	W							Dubious open reading frame; unlikely to encode a functional protein, based on available experimental and comparative sequence data; overlaps HMLALPHA1
YCL066W	HMLALPHA1	3	13282	13809	W	transcriptional co-activator mating type protein alpha|ALPHA1	2.66145					Silenced copy of ALPHA1 at HML; ALPHA1 encodes a transcriptional coactivator involved in the regulation of mating-type alpha-specific gene expression
YCL067C	HMLALPHA2	3	12386	13018	C	homeodomain mating type protein alpha2|ALPHA2	6.22303					Silenced copy of ALPHA2 at HML; homeobox-domain protein that associates with Mcm1p in haploid cells to repress a-specific gene expression and interacts with a1p in diploid cells to repress haploid-specific gene expression
YCL068C	YCL068C	3	11503	12285	C							Putative protein of unknown function
YCL069W	VBA3	3	9706	11082	W	basic amino acid transporter						Permease of basic amino acids in the vacuolar membrane; VBA3 has a paralog, VBA5, that arose from a segmental duplication
YCL073C	GEX1	3	6479	8326	C	glutathione exchanger						Proton:glutathione antiporter; localized to the vacuolar and plasma membranes; imports glutathione from the vacuole and exports it through the plasma membrane; has a role in resistance to oxidative stress and modulation of the PKA pathway; GEX1 has a paralog, GEX2, that arose from a segmental duplication
YCL076W	YCL076W	3	1392	2135	W							Dubious open reading frame; unlikely to encode a functional protein, based on available experimental and comparative sequence data
YCR001W	YCR001W	3	115685	115999	W							Putative protein of unknown function; conserved among S. cerevisiae strains; YCR001W is not an essential gene
YCR002C	CDC10	3	117380	118348	C	septin CDC10	7.15344	533.5		345.5		Component of the septin ring, required for cytokinesis; septins are GTP-binding proteins that assemble into rod-like hetero-oligomers that can associate to form filaments; septin rings at the mother-bud neck act as scaffolds for recruiting cell division factors and as barriers to prevent diffusion of specific proteins between mother and daughter cells; N-terminus interacts with phosphatidylinosit…
YCR003W	MRPL32	3	118620	119171	W	mitochondrial 54S ribosomal protein YmL32|YmL32	6.13608	202.5		311.4		Mitochondrial ribosomal protein of the large subunit; protein abundance increases in response to DNA replication stress
YCR004C	YCP4	3	119575	120318	C	flavodoxin-like fold family protein	7.99713	603.5		720.5		Protein of unknown function; has sequence and structural similarity to flavodoxins; predicted to be palmitoylated; the authentic, non-tagged protein is detected in highly purified mitochondria in high-throughput studies
YCR005C	CIT2	3	120946	122328	C	citrate (Si)-synthase CIT2	7.75416		Abundance_Low	168		Citrate synthase, peroxisomal isozyme involved in glyoxylate cycle; catalyzes condensation of acetyl coenzyme A and oxaloacetate to form citrate; expression is controlled by Rtg1p and Rtg2p transcription factors; SCF-Ucc1 regulates level of Cit2p to maintain citrate homeostasis; oxaloacetate-dependent positive feedback loop inhibits Cit2p ubiquitination; CIT2 has a paralog, CIT1, that arose from …
YCR006C	YCR006C	3	122530	123003	C		2.52746					Putative protein of unknown function; conserved among S. cerevisiae strains; YCR006C is not an essential gene
YCR007C	YCR007C	3	126011	126730	C	DUP240 family protein	3.72311					Putative integral membrane protein; member of DUP240 gene family; SWAT-GFP and mCherry fusion proteins localize to the cell periphery and vacuole; YCR007C is not an essential gene
YCR008W	SAT4	3	128470	130281	W	serine/threonine protein kinase SAT4|HAL4	5.8485					Ser/Thr protein kinase involved in salt tolerance; funtions in regulation of Trk1p-Trk2p potassium transporter; overexpression affects the Fe-S and lipoamide containing proteins in the mitochondrion; required for lipoylation of Lat1p, Kgd2p and Gcv3p; partially redundant with Hal5p; has similarity to Npr1p; localizes to the cytoplasm and mitochondrion
YCR009C	RVS161	3	130745	131542	C	amphiphysin-like protein RVS161|SPE161|FUS7|END6	7.76103	743.5		700.5		Amphiphysin-like lipid raft protein; N-BAR domain protein that interacts with Rvs167p and regulates polarization of the actin cytoskeleton, endocytosis, cell polarity, cell fusion and viability following starvation or osmotic stress
YCR010C	ADY2	3	132273	133124	C	ATO1						Acetate transporter required for normal sporulation; phosphorylated in mitochondria; ADY2 has a paralog, ATO2, that arose from the whole genome duplication
YCR011C	ADP1	3	133724	136873	C	putative ATP-dependent permease ADP1	5.78284	207.5		183.2		Putative ATP-dependent permease of the ABC transporter family
YCR012W	PGK1	3	137746	138996	W	phosphoglycerate kinase	11.5526	42839.5		35610.5		3-phosphoglycerate kinase; catalyzes transfer of high-energy phosphoryl groups from the acyl phosphate of 1,3-bisphosphoglycerate to ADP to produce ATP; key enzyme in glycolysis and gluconeogenesis
YCR013C	YCR013C	3	138402	139049	C		3.04223					Dubious open reading frame; unlikely to encode a functional protein, based on available experimental and comparative sequence data; transcription of both YCR013C and the overlapping essential gene PGK1 is reduced in a gcr1 null mutant
YCR014C	POL4	3	139185	140933	C	DNA-directed DNA polymerase IV|POLX	4.52634					DNA polymerase IV; undergoes pair-wise interactions with Dnl4p-Lif1p and Rad27p to mediate repair of DNA double-strand breaks by non-homologous end joining (NHEJ); homologous to mammalian DNA polymerase beta
YCR015C	CTO1	3	141217	142170	C		4.79848					Protein required for cold tolerance; involved in phosphate uptake; YCR015C is not an essential gene
YCR016W	YCR016W	3	143634	144506	W		6.51389	163.5		99.5		Putative protein of unknown function; green fluorescent protein (GFP)-fusion protein localizes to the nucleolus and nucleus; predicted to be involved in ribosome biogenesis
YCR017C	CWH43	3	144773	147634	C		5.68295	83.5		107.2		GPI lipid remodelase; responsible for introducing ceramides into GPI anchors having a C26:0 fatty acid in sn-2 of the glycerol moiety; can also use lyso-GPI protein anchors and various base resistant lipids as substrates; contains 14-16 transmembrane segments and several putative glycosylation and phosphorylation sites; null mutation is synthetically lethal with pkc1 deletion
YCR018C	SRD1	3	148238	148903	C		2.6087		Abundance_Low		Abundance_Low	Protein involved in the processing of pre-rRNA to mature rRNA; contains a C2/C2 zinc finger motif; srd1 mutation suppresses defects caused by the rrp1-1 mutation
YCR018C-A	YCR018C-A	3	151608	151862	C			744		453.5		Putative protein of unknown function; encoded opposite a Ty1 LTR
YCR019W	MAK32	3	152837	153928	W		4.9114					Protein necessary for stability of L-A dsRNA-containing particles
YCR020C	PET18	3	154012	154659	C	HIT2	4.54726		Abundance_Low		Abundance_Low	Protein of unknown function; has weak similarity to proteins involved in thiamin metabolism; expression is induced in the absence of thiamin
YCR020C-A	MAK31	3	154830	155096	C	NAA38|SMX1|LSM9						Non-catalytic subunit of N-terminal acetyltransferase of the NatC type; required for replication of dsRNA virus; member of the Sm protein family
YCR020W-B	HTL1	3	155320	155556	W			297.5		272.3		Component of the RSC chromatin remodeling complex; RSC functions in transcriptional regulation and elongation, chromosome stability, and establishing sister chromatid cohesion; involved in telomere maintenance
YCR021C	HSP30	3	156109	157107	C	YRO1	3.75491	64.5			Abundance_Low	Negative regulator of the H(+)-ATPase Pma1p; stress-responsive protein; hydrophobic plasma membrane localized; induced by heat shock, ethanol treatment, weak organic acid, glucose limitation, and entry into stationary phase
YCR022C	YCR022C	3	157421	157765	C							Putative protein of unknown function; conserved among S. cerevisiae strains; YCR022C is not an essential gene
YCR023C	YCR023C	3	158538	160373	C		5.03206		Abundance_Low		Abundance_Low	Vacuolar membrane protein of unknown function; member of the multidrug resistance family; YCR023C is not an essential gene
YCR024C	SLM5	3	160744	162222	C	asparagine--tRNA ligase SLM5	4.07868		Abundance_Low		Abundance_Low	Mitochondrial asparaginyl-tRNA synthetase
YCR024C-A	PMP1	3	162945	163067	C	proteolipid ATPase		6641.5		4041		Regulatory subunit for the plasma membrane H(+)-ATPase Pma1p; small single-membrane span proteolipid; forms unique helix and positively charged cytoplasmic domain that is able to specifically segregate phosphatidylserines; PMP1 has a paralog, PMP2, that arose from the whole genome duplication
YCR024C-B	YCR024C-B	3	162599	162865	C							Putative protein of unknown function; identified by expression profiling and mass spectrometry
YCR025C	YCR025C	3	163446	163856	C		1.60767					Putative protein of unknown function; conserved across S. cerevisiae strains; YCR025C is not an essential gene
YCR026C	NPP1	3	164111	166339	C	nucleotide diphosphatase/phosphodiesterase NPP1	5.69328					Nucleotide pyrophosphatase/phosphodiesterase; mediates extracellular nucleotide phosphate hydrolysis along with Npp2p and Pho5p; activity and expression enhanced during conditions of phosphate starvation; involved in spore wall assembly; NPP1 has a paralog, NPP2, that arose from the whole genome duplication, and an npp1 npp2 double mutant exhibits reduced dityrosine fluorescence relative to the s…
YCR027C	RHB1	3	167370	167999	C	putative GTPase RHB1|RSG1	5.67872	80			Abundance_Low	Putative Rheb-related GTPase; involved in regulating canavanine resistance and arginine uptake; member of the Ras superfamily of G-proteins
YCR028C	FEN2	3	170886	172424	C		4.94355	167		100.5		Plasma membrane H+-pantothenate symporter; confers sensitivity to the antifungal agent fenpropimorph; relocalizes from vacuole to cytoplasm upon DNA replication stress
YCR028C-A	RIM1	3	172950	173440	C			435		453.9		ssDNA-binding protein essential for mitochondrial genome maintenance; involved in mitochondrial DNA replication; stimulates utilization by Mip1p DNA polymerase of RNA primers synthesized by Rpo41p
YCR030C	SYP1	3	173826	176438	C	YCR029C-A	5.42296	192.5		323.5		Negative regulator of WASP-Arp23 complex; involved in endocytic site formation; directly inhibits Las17p stimulation of Arp23 complex-mediated actin assembly in vitro; may regulate assembly and disassembly of the septin ring; colocalizes and interacts with septin subunits; potential role in actin cytoskeletal organization
YCR031C	RPS14A	3	177500	178220	C	uS11|ribosomal 40S subunit protein S14A|S11|rp59A|S14A|RPL59|CRY1	11.1142					Protein component of the small (40S) ribosomal subunit; required for ribosome assembly and 20S pre-rRNA processing; mutations confer cryptopleurine resistance; homologous to mammalian ribosomal protein S14 and bacterial S11; RPS14A has a paralog, RPS14B, that arose from the whole genome duplication
YCR032W	BPH1	3	179520	186023	W		3.36235					Protein homologous to Chediak-Higashi syndrome and Beige proteins; both of which are implicated in disease syndromes in human and mouse, respectively, due to defective lysosomal trafficking; mutant phenotype and genetic interactions suggest a role in protein sorting
YCR033W	SNT1	3	186489	190169	W		5.48334		Abundance_Low		Abundance_Low	Subunit of the Set3C deacetylase complex; interacts directly with the Set3C subunit, Sif2p; putative DNA-binding protein; mutant has increased aneuploidy tolerance; relocalizes to the cytosol in response to hypoxia
YCR034W	ELO2	3	190592	191635	W	fatty acid elongase ELO2|FEN1|VBM2|GNS1	7.70389	1437		804		Fatty acid elongase, involved in sphingolipid biosynthesis; acts on fatty acids of up to 24 carbons in length; mutations have regulatory effects on 1,3-beta-glucan synthase, vacuolar ATPase, and the secretory pathway; ELO2 has a paralog, ELO1, that arose from the whole genome duplication; lethality of the elo2 elo3 double null mutation is functionally complemented by human ELOVL1 and weakly compl…
YCR035C	RRP43	3	191834	193018	C	exosome non-catalytic core subunit RRP43	6.49925	234		177.5		Exosome non-catalytic core component; involved in 3'-5' RNA processing and degradation in both the nucleus and the cytoplasm; has similarity to E. coli RNase PH and to human hRrp43p (OIP2, EXOSC8); protein abundance increases in response to DNA replication stress
YCR036W	RBK1	3	193297	194298	W	putative ribokinase	6.6857	156		311		Putative ribokinase
YCR037C	PHO87	3	194414	197185	C	SPX domain-containing inorganic phosphate transporter	5.30122		Abundance_Low	52.5		Low-affinity inorganic phosphate (Pi) transporter; acts upstream of Pho81p in regulation of the PHO pathway; expression is independent of Pi concentration and Pho4p activity; contains 12 membrane-spanning segments; PHO87 has a paralog, PHO90, that arose from the whole genome duplication
YCR038C	BUD5	3	197621	199549	C	Ras family guanine nucleotide exchange factor BUD5	3.53736		Abundance_Low		Abundance_Low	GTP/GDP exchange factor for Rsr1p (Bud1p); required for both axial and bipolar budding patterns; mutants exhibit random budding in all cell types
YCR038W-A	YCR038W-A	3	199293	199418	W							Dubious open reading frame; unlikely to encode a functional protein, based on available experimental and comparative sequence data; completely overlaps the verified gene BUD5/YCR038C; identified by homology with hemiascomycetous yeast species
YCR039C	MATALPHA2	3	199546	200178	C	homeodomain mating type protein alpha2|ALPHA2	6.22303					Homeobox-domain protein; with Mcm1p, represses a-specific genes in haploids; acts with A1p to repress transcription of haploid-specific genes in diploids; one of two genes encoded by the MATalpha mating type cassette
YCR040W	MATALPHA1	3	200442	200969	W	transcriptional co-activator mating type protein alpha|ALPHA1	2.66145					Transcriptional co-activator that regulates mating-type-specific genes; targets the transcription factor Mcm1p to the promoters of alpha-specific genes; one of two genes encoded by the MATalpha mating type cassette
YCR041W	YCR041W	3	200911	201243	W		4.15695					Protein of unknown function; overexpression suppresses the high-frequency loss of mini-chromosomes, probably by increasing the rate of proper chromosome segregation; translated gene product of YCR041W, but not its transcript, is responsible for suppression; suppression ability of YCR041W is completely dependent on silencing protein Sir4p
YCR042C	TAF2	3	201174	205397	C	TafII150|TSM1|TAF150	4.87024		Abundance_Low		Abundance_Low	TFIID subunit (150 kDa); involved in RNA polymerase II transcription initiation
YCR043C	YCR043C	3	206261	206644	C		7.58371	332		202.9		Putative protein of unknown function; green fluorescent protein (GFP)-fusion protein localizes to the Golgi apparatus; YCR043C is not an essential gene
YCR044C	PER1	3	206877	207950	C	COS16	5.75064	142		144.5		Protein of the endoplasmic reticulum; required for GPI-phospholipase A2 activity that remodels the GPI anchor as a prerequisite for association of GPI-anchored proteins with lipid rafts; functionally complemented by human ortholog PERLD1
YCR045C	RRT12	3	208135	209610	C	OSW3						Probable subtilisin-family protease; role in formation of the dityrosine layer of spore walls; localizes to the spore wall and also the nuclear envelope and ER region in mature spores
YCR045W-A	YCR045W-A	3	208751	209101	W							Dubious open reading frame; unlikely to encode a functional protein, based on available experimental and comparative sequence data; completely overlaps with YCR045C; identified by gene-trapping, microarray expression analysis, and genome-wide homology searching
YCR046C	IMG1	3	209914	210423	C	mitochondrial 54S ribosomal protein IMG1	6.70378	161		189.9		Mitochondrial ribosomal protein of the large subunit; required for respiration and for maintenance of the mitochondrial genome
YCR047C	BUD23	3	210718	211545	C	18S rRNA (guanine1575-N7)-methyltransferase	6.86278	188.5		110		Methyltransferase that methylates residue G1575 of 18S rRNA; required for rRNA processing and nuclear export of 40S ribosomal subunits independently of methylation activity; diploid mutant displays random budding pattern; functional homolog of human WBSCR22
YCR047W-A	YCR047W-A	3	211301	211507	W							Dubious open reading frame; unlikely to encode a functional protein, based on available experimental and comparative sequence data; completely overlaps with YCR047C; identified by gene-trapping, microarray expression analysis, and genome-wide homology searching
YCR048W	ARE1	3	211929	213761	W	sterol acyltransferase|SAT2	4.79463		Abundance_Low		Abundance_Low	Acyl-CoA:sterol acyltransferase; endoplasmic reticulum enzyme that contributes the major sterol esterification activity in the absence of oxygen; ARE1 has a paralog, ARE2, that arose from the whole genome duplication
YCR049C	YCR049C	3	211871	212317	C							Dubious open reading frame; unlikely to encode a functional protein, based on available experimental and comparative sequence data
YCR050C	YCR050C	3	213464	213772	C							Non-essential protein of unknown function; deletion mutant is synthetically sick or lethal with alpha-synuclein
YCR051W	YCR051W	3	214071	214739	W		6.95601	106.5		88		Putative protein of unknown function; green fluorescent protein (GFP)-fusion protein localizes to the cytoplasm and nucleus; contains ankyrin (Ank) repeats; YCR051W is not an essential gene
YCR052W	RSC6	3	214994	216445	W		6.36217					Component of the RSC chromatin remodeling complex; essential for mitotic growth; RSC6 has a paralog, SNF12, that arose from the whole genome duplication
YCR053W	THR4	3	216697	218241	W	threonine synthase THR4	7.97343	3806.5		3691.5		Threonine synthase; conserved protein that catalyzes formation of threonine from O-phosphohomoserine; expression is regulated by the GCN4-mediated general amino acid control pathway
YCR054C	CTR86	3	218376	220067	C		4.44388	90		51.5		Essential protein of unknown function; with orthologs in Ashbya gossypii and Candida albicans; similar to human ATXN10, mutations in which cause spinocerebellar ataxia type 10; codon usage corresponds to that observed for yeast genes expressed at low levels; relative distribution to the nucleus increases upon DNA replication stress
YCR057C	PWP2	3	220457	223228	C	snoRNA-binding rRNA-processing protein PWP2|UTP1|YCR058C|YCR055C	6.13224	503		259		Conserved 90S pre-ribosomal component; essential for proper endonucleolytic cleavage of the 35 S rRNA precursor at A0, A1, and A2 sites; contains eight WD-repeats; PWP2 deletion leads to defects in cell cycle and bud morphogenesis
YCR059C	YIH1	3	223454	224230	C		6.30436	144.5		135.5		Negative regulator of eIF2 kinase Gcn2p; competes with Gcn2p for binding to Gcn1p; may contribute to regulation of translation in response to starvation via regulation of Gcn2p; binds to monomeric actin and to ribosomes and polyribosomes; ortholog of mammalian IMPACT
YCR060W	TAH1	3	224399	224734	W		6.64363	75.5			Abundance_Low	Component of conserved R2TP complex (Rvb1-Rvb2-Tah1-Pih1); R2TP complex interacts with Hsp90 (Hsp82p and Hsc82p) to mediate assembly of large protein complexes such as box C/D snoRNPs and RNA polymerase II; contains a single TPR domain with at least two TPR motifs; plays a role in determining prion variants
YCR061W	YCR061W	3	225563	227458	W	YCR062W	2.2254		Abundance_Low		Failed_QC/Abundance_Low	Protein of unknown function; green fluorescent protein (GFP)-fusion protein localizes to the cytoplasm in a punctate pattern; induced by treatment with 8-methoxypsoralen and UVA irradiation
YCR063W	BUD31	3	228318	228791	W	U2 snRNP complex subunit BUD31|CWC14	4.19476	186.5		152.5		Component of the SF3b subcomplex of the U2 snRNP; increases efficiency of first and second step pre-mRNA splicing; diploid mutants display a random budding pattern instead of the wild-type bipolar pattern; facilitates passage through G1/S Start, but is not required for G2/M transition or exit from mitosis
YCR064C	YCR064C	3	228095	228505	C		1.83639					Dubious open reading frame; unlikely to encode a functional protein, based on available experimental and comparative sequence data; partially overlaps the verified gene BUD31
YCR065W	HCM1	3	229310	231004	W		5.81925	56.5			Abundance_Low	Forkhead transcription factor; drives S-phase activation of genes involved in chromosome segregation, spindle dynamics, budding; also activates genes involved in respiration, use of alternative energy sources (like proline), NAD synthesis, oxidative stress resistance; key factor in early adaptation to nutrient deficiency and diauxic shift; suppressor of calmodulin mutants with specific SPB assemb…
YCR066W	RAD18	3	231500	232963	W	E3 ubiquitin-protein ligase RAD18	3.96637					E3 ubiquitin ligase; forms heterodimer with Rad6p to monoubiquitinate PCNA-K164; heterodimer binds single-stranded DNA and has single-stranded DNA dependent ATPase activity; required for postreplication repair; SUMO-targeted ubiquitin ligase (STUbl) that contains a SUMO-interacting motif (SIM) which stimulates its ubiquitin ligase activity towards the sumoylated form of PCNA
YCR067C	SED4	3	233125	236322	C		5.09209	82			Abundance_Low	Integral ER membrane protein that stimulates Sar1p GTPase activity; involved in COPII vesicle budding through disassociation of coat proteins from membranes onto liposomes; binds Sec16p; SED4 has a paralog, SEC12, that arose from the whole genome duplication
YCR068W	ATG15	3	237214	238776	W	triglyceride lipase ATG15|CVT17|AUT5	4.64986					Phospholipase; preferentially hydrolyses phosphatidylserine, with minor activity against cardiolipin and phosphatidylethanolamine; required for lysis of autophagic and CVT bodies; targeted to intravacuolar vesicles during autophagy via the multivesicular body (MVB) pathway; required for the maintenance of lipid droplet quantity after the diauxic shift; regulates lipolysis; expression regulated by…
YCR069W	CPR4	3	239055	240011	W	peptidylprolyl isomerase family protein CPR4|SCC3|YCR070W|CYP4	6.73036	68			Abundance_Low	Peptidyl-prolyl cis-trans isomerase (cyclophilin); catalyzes the cis-trans isomerization of peptide bonds N-terminal to proline residues; has a potential role in the secretory pathway; CPR4 has a paralog, CPR8, that arose from the whole genome duplication
YCR071C	IMG2	3	240103	240543	C	mitochondrial 54S ribosomal protein IMG2	6.51977	115.5		90.6		Mitochondrial ribosomal protein of the large subunit; conserved in metazoa, with similarity to human mitochondrial ribosomal protein MRPL49
YCR072C	RSA4	3	240805	242352	C		6.07843					WD-repeat protein involved in ribosome biogenesis; may interact with ribosomes; required for maturation and efficient intra-nuclear transport or pre-60S ribosomal subunits, localizes to the nucleolus
YCR073C	SSK22	3	242588	246583	C	mitogen-activated protein kinase kinase kinase SSK22	3.28321					MAP kinase kinase kinase of HOG1 mitogen-activated signaling pathway; functionally redundant with Ssk2p; interacts with and is activated by Ssk1p; phosphorylates Pbs2p; SSK22 has a paralog, SSK2, that arose from the whole genome duplication
YCR073W-A	SOL2	3	246963	247910	W	YCRX13W			Abundance_Low		Abundance_Low	Protein with a possible role in tRNA export; shows similarity to 6-phosphogluconolactonase non-catalytic domains but does not exhibit this enzymatic activity; homologous to Sol3p and Sol4p; SOL2 has a paralog, SOL1, that arose from the whole genome duplication
YCR075C	ERS1	3	248033	248815	C	cystinosin-like protein ERS1	5.39151					Protein involved in cystine transport; localizes to the vacuole, plasma membrane and endosome; similarity to human cystinosin, a H(+)-driven transporter involved in L-cystine export from lysosomes and implicated in the disease cystinosis; contains seven transmembrane domains; mutation is functionally complemented by human CTNS
YCR075W-A	EGO2	3	248975	249202	W							Component of the EGO and GSE complexes; identified by homology to Ashbya gossypii; YCR075W-A has a paralog, YNR034W-A, that arose from the whole genome duplication
YCR076C	FUB1	3	249293	250045	C		5.49888					Proteasome-binding protein; interacts physically with multiple subunits of the 20S proteasome and genetically with genes encoding 20S core particle and 19S regulatory particle subunits; exhibits boundary activity which blocks the propagation of heterochromatic silencing; contains a PI31 proteasome regulator domain and sequence similarity with human PSMF1, a proteasome inhibitor; not an essential …
YCR077C	PAT1	3	250238	252628	C	MRT1	5.76832	302.5		295.5		Deadenylation-dependent mRNA-decapping factor; also required for faithful chromosome transmission, maintenance of rDNA locus stability, and protection of mRNA 3'-UTRs from trimming; associated with topoisomerase II; binds to mRNAs under glucose starvation, most often in the 3' UTR; functionally linked to Pab1p; forms cytoplasmic foci upon DNA replication stress; phosphorylation by PKA inhibits P …
YCR079W	PTC6	3	252845	254173	W	type 2C protein phosphatase PTC6|PPP2|AUP1	5.29783		Abundance_Low		Abundance_Low	Mitochondrial type 2C protein phosphatase (PP2C); has similarity to mammalian PP1Ks; involved in mitophagy; null mutant is sensitive to rapamycin and has decreased phosphorylation of the Pda1 subunit of pyruvate dehydrogenase
YCR081C-A	YCR081C-A	3	258415	258651	C							Dubious open reading frame; unlikely to encode a functional protein, based on available experimental and comparative sequence data; completely overlaps with SRB8/YCR081W; identified by gene-trapping, microarray expression analysis, and genome-wide homology searching
YCR081W	SRB8	3	254371	258654	W	MED12|YCR080W|SSN5|NUT6|GIG1	3.21522		Abundance_Low		Failed_QC	Subunit of the RNA polymerase II mediator complex; associates with core polymerase subunits to form the RNA polymerase II holoenzyme; essential for transcriptional regulation; involved in glucose repression
YCR082W	AHC2	3	258883	259269	W		7.73307		Abundance_Low	50		Component of the ADA histone acetyltransferase complex; Ahc2p and Ahc1p are unique to the ADA complex and not shared with the related SAGA and SLIK complexes; may tether Ahc1p to the complex
YCR083W	TRX3	3	259578	259961	W		6.89598		Abundance_Low		Abundance_Low	Mitochondrial thioredoxin; highly conserved oxidoreductase required to maintain the redox homeostasis of the cell, forms the mitochondrial thioredoxin system with Trr2p, redox state is maintained by both Trr2p and Glr1p
YCR084C	TUP1	3	260311	262452	C	chromatin-silencing transcriptional regulator TUP1|UMR7|SFL2|ROX4|FLK1|CYC9|CRT4|AMM1|AER2|AAR1	7.03194		Failed_QC	160		General repressor of transcription; forms complex with Cyc8p, involved in the establishment of repressive chromatin structure through interactions with histones H3 and H4, appears to enhance expression of some genes
YCR085W	YCR085W	3	262916	263269	W							Putative protein of unknown function; conserved among S. cerevisiae strains; YCR085W is not an essential gene
YCR086W	CSM1	3	263392	263964	W		5.47659		Abundance_Low		Abundance_Low	Nucleolar protein that mediates homolog segregation during meiosis I; forms a complex with Lrs4p and then Mam1p at kinetochores; required for condensin recruitment to the replication fork barrier site and rDNA repeat segregation
YCR087C-A	YCR087C-A	3	264006	264467	C	LUG1		92			Abundance_Low	Putative protein of unknown function; green fluorescent protein (GFP)-fusion protein localizes to the nucleolus; YCR087C-A is not an essential gene
YCR087W	YCR087W	3	263976	264491	W		2.15805					Dubious open reading frame; unlikely to encode a functional protein, based on available experimental and comparative sequence data; partially overlaps uncharacterized gene YCR087C-A; YCR087W is not an essential gene
YCR088W	ABP1	3	265068	266846	W		7.20046	1065		931.5		Actin-binding protein of the cortical actin cytoskeleton; important for activation of the Arp2/3 complex that plays a key role actin in cytoskeleton organization; inhibits barbed-end actin filament elongation; phosphorylation within its Proline-Rich Regio, mediated by Cdc28p and Pho85p, protects Abp1p from proteolysis mediated by its own PEST sequences; mammalian homolog of HIP-55 (hematopoietic …
YCR089W	FIG2	3	267434	272263	W		3.59087					Cell wall adhesin, expressed specifically during mating; may be involved in maintenance of cell wall integrity during mating; FIG2 has a paralog, AGA1, that arose from the whole genome duplication
YCR090C	YCR090C	3	272315	272863	C		6.3355	125.5		86.6		Putative protein of unknown function; green fluorescent protein (GFP)-fusion protein localizes to the cytoplasm and nucleus; YCR090C is not an essential gene
YCR091W	KIN82	3	274404	276566	W	putative serine/threonine protein kinase KIN82|FPK2	3.22867					Putative serine/threonine protein kinase; implicated in the regulation of phospholipid asymmetry through the activation of phospholipid translocases (flippases); involved in the phosphorylation of upstream inhibitory kinase Ypk1p along with Fpk1p; has a redundant role in the cellular response to mating pheromone; KIN82 has a paralog, FPK1, that arose from the whole genome duplication
YCR092C	MSH3	3	276764	279820	C	mismatch repair protein MSH3	4.27795		Abundance_Low		Abundance_Low	Mismatch repair protein; forms dimers with Msh2p that mediate repair of insertion or deletion mutations and removal of nonhomologous DNA ends, contains a PCNA (Pol30p) binding motif required for genome stability
YCR093W	CDC39	3	280117	286443	W	CCR4-NOT core subunit CDC39|SMD6|ROS1|NOT1	4.84713	444.5		382.5		Subunit of the CCR4-NOT1 core complex; this complex has multiple roles in the regulation of mRNA levels including regulation of transcription and destabilization of mRNA by deadenylation; basal transcription factor that increases initiation and elongation; activates the ATPase activity of Dhh1p, resulting in processing body disassembly
YCR094W	CDC50	3	286762	287937	W	aminophospholipid translocase regulatory protein CDC50	5.70198	78.5			Abundance_Low	Endosomal protein that interacts with phospholipid flippase Drs2p; interaction with Cdc50p is essential for Drs2p catalytic activity; mutations affect cell polarity and polarized growth; similar to Lem3p; CDC50 has a paralog, YNR048W, that arose from the whole genome duplication
YCR095C	OCA4	3	288170	289258	C		5.3135	53			Abundance_Low	Cytoplasmic protein required for replication of Brome mosaic virus; S. cerevisiae is a model system for studying replication of positive-strand RNA viruses in their natural hosts
YCR095W-A	YCR095W-A	3	289639	289797	W							Putative protein of unknown function
YCR096C	HMRA2	3	293179	293538	C	homeodomain mating type protein a2|A2	5.60559					Silenced copy of a2 at HMR; similarity to Alpha2p; required along with a1p for inhibiting expression of the HO endonuclease in a/alpha HO/HO diploid cells with an active mating-type interconversion system
YCR097W	HMRA1	3	293835	294321	W	YCR097WB	3.39894					Silenced copy of a1 at HMR; homeobox corepressor that interacts with Alpha2p to repress haploid-specific gene transcription in diploid cells
YCR097W-A	YCR097W-A	3	294439	294705	W							Dubious open reading frame; unlikely to encode a functional protein, based on available experimental and comparative sequence data; identified by homology to a hemiascomycetous yeast protein
YCR098C	GIT1	3	297049	298605	C		3.64428					Plasma membrane permease; mediates uptake of glycerophosphoinositol and glycerophosphocholine as sources of the nutrients inositol and phosphate; expression and transport rate are regulated by phosphate and inositol availability
YCR099C	YCR099C	3	300832	301299	C		3.00202					Putative protein of unknown function
YCR100C	YCR100C	3	301271	302221	C		2.84112					Putative protein of unknown function
YCR101C	YCR101C	3	302482	303030	C		2.6711					Putative protein of unknown function; localizes to the membrane fraction; YCR101C is not an essential gene
YCR102C	YCR102C	3	304361	305467	C		1.96017					Putative protein of unknown function; involved in copper metabolism; similar to C. carbonum toxD gene; member of the quinone oxidoreductase family
YCR102W-A	YCR102W-A	3	306735	306932	W							Dubious open reading frame; unlikely to encode a functional protein, based on available experimental and comparative sequence data
YCR104W	PAU3	3	307801	308175	W	seripauperin PAU3	1.0635					Member of the seripauperin multigene family; encoded mainly in subtelomeric region; active during alcoholic fermentation; regulated by anaerobiosis; negatively regulated by oxygen; repressed by heme
YCR105W	ADH7	3	309070	310155	W	NADP-dependent alcohol dehydrogenase|ADHVII	2.92855					NADPH-dependent medium chain alcohol dehydrogenase; has broad substrate specificity; member of the cinnamyl family of alcohol dehydrogenases; may be involved in fusel alcohol synthesis or in aldehyde tolerance
YCR106W	RDS1	3	310958	313456	W		4.74263					Putative zinc cluster transcription factor; involved in conferring resistance to cycloheximide
YCR107W	AAD3	3	313890	314981	W	putative aryl-alcohol dehydrogenase	5.50832					Putative aryl-alcohol dehydrogenase; similar to P. chrysosporium aryl-alcohol dehydrogenase; mutational analysis has not yet revealed a physiological role; AAD3 has a paralog, AAD15, that arose from a segmental duplication; members of the AAD gene family comprise three pairs (AAD3 + AAD15, AAD6/AAD16 + AAD4, AAD10 + AAD14) whose two genes are more related to one another than to other members of t…
YCR108C	YCR108C	3	315997	316188	C							Putative protein of unknown function; identified by fungal homology and RT-PCR
YDL001W	RMD1	4	447984	449276	W		5.2258		Abundance_Low		Abundance_Low	Cytoplasmic protein required for sporulation
YDL002C	NHP10	4	446967	447578	C	HMO2	6.62596	115.5		74		Non-essential INO80 chromatin remodeling complex subunit; preferentially binds DNA ends, protecting them from exonucleatic cleavage; deletion affects telomere maintenance via recombination; related to mammalian high mobility group proteins
YDL003W	MCD1	4	444683	446383	W	kleisin alpha|SCC1|RHC21|PDS3	6.71948	138.5		58.5		Essential alpha-kleisin subunit of the cohesin complex; required for sister chromatid cohesion in mitosis and meiosis; apoptosis induces cleavage and translocation of a C-terminal fragment to mitochondria; expression peaks in S phase
YDL004W	ATP16	4	443029	443511	W	F1F0 ATP synthase subunit delta	8.86242					Delta subunit of the central stalk of mitochondrial F1F0 ATP synthase; F1F0 ATP synthase is a large, evolutionarily conserved enzyme complex required for ATP synthesis; F1 translationally regulates ATP6 and ATP8 expression to achieve a balanced output of ATP synthase genes encoded in nucleus and mitochondria; phosphorylated
YDL005C	MED2	4	441014	442309	C		5.99444	74.5		84		Subunit of the RNA polymerase II mediator complex; associates with core polymerase subunits to form the RNA polymerase II holoenzyme; essential for transcriptional regulation; relocalizes to the cytosol in response to hypoxia
YDL006W	PTC1	4	439909	440754	W	type 2C protein phosphatase PTC1|TPD1|KCS2|CWH47	5.78903					Type 2C protein phosphatase (PP2C); dephosphorylates Hog1p, inactivating osmosensing MAPK cascade; involved in Fus3p activation during pheromone response; deletion affects precursor tRNA splicing, mitochondrial inheritance, and sporulation
YDL007C-A	YDL007C-A	4	436567	436824	C							Putative protein of unknown function
YDL007W	RPT2	4	438047	439360	W	proteasome regulatory particle base subunit RPT2|YTA5|YHS4	8.04082					ATPase of the 19S regulatory particle of the 26S proteasome; one of six ATPases of the regulatory particle; involved in the degradation of ubiquitinated substrates; required for normal peptide hydrolysis by the core 20S particle; N-myristoylation of Rpt2p at Gly2 is involved in regulating the proper intracellular distribution of proteasome activity by controlling the nuclear localization of the 2…
YDL008W	APC11	4	433497	433994	W	anaphase promoting complex subunit 11	6.01252	133		111.6		Catalytic core subunit, Anaphase-Promoting Complex/Cyclosome (APC/C); which is a ubiquitin-protein ligase required for degradation of anaphase inhibitors, including mitotic cyclins, during the metaphase/anaphase transition; contains a RING-H2 domain that is required for activity
YDL009C	YDL009C	4	432925	433248	C							Protein of unknown function; mRNA identified as translated by ribosome profiling data; SWAT-GFP and mCherry fusion proteins localize to the cytosol; partially overlaps the verified ORF YDL010W; YDL009C is not an essential gene
YDL010W	GRX6	4	432330	433025	W	glutathione-disulfide reductase GRX6	5.83617	50.5			Abundance_Low	Cis-golgi localized monothiol glutaredoxin, binds Fe-S cluster; more similar in activity to dithiol than other monothiol glutaredoxins; involved in the oxidative stress response; GRX6 has a paralog, GRX7, that arose from the whole genome duplication
YDL011C	YDL011C	4	432308	432631	C							Dubious open reading frame; unlikely to encode a functional protein, based on available experimental and comparative sequence data; overlaps the uncharacterized ORF YDL010W
YDL012C	YDL012C	4	431108	431517	C		6.5623	59.5			Abundance_Low	Tail-anchored plasma membrane protein with a conserved CYSTM module; possibly involved in response to stress; may contribute to non-homologous end-joining (NHEJ) based on ydl012c htz1 double null phenotype; YDL012C has a paralog, YBR016W, that arose from the whole genome duplication
YDL013W	SLX5	4	429067	430926	W	SUMO-targeted ubiquitin ligase complex subunit SLX5|ULS2|HEX3	5.33					Subunit of the Slx5-Slx8 SUMO-targeted Ub ligase (STUbL) complex; role in Ub-mediated degradation of histone variant Cse4p preventing mislocalization to euchromatin; role in proteolysis of spindle positioning protein Kar9p, and DNA repair proteins Rad52p and Rad57p; forms SUMO-dependent nuclear foci, including DNA repair centers; contains a RING domain and two SIM motifs; associates with the cent…
YDL014W	NOP1	4	427364	428347	W	rRNA methyltransferase NOP1|LOT3	8.95998					Histone glutamine methyltransferase, modifies H2A at Q105 in nucleolus; component of the small subunit processome complex, which is required for processing of pre-18S rRNA; ortholog of mammalian fibrillarin; inviability of the null mutant is functionally complemented by human FBL
YDL015C	TSC13	4	426002	426934	C	trans-2-enoyl-CoA reductase (NADPH) TSC13	7.70077	854.5		609		Enoyl reductase; catalyzes last step in each cycle of very long chain fatty acid elongation; localizes to ER, highly enriched in a structure marking nuclear-vacuolar junctions; coimmunoprecipitates with elongases Elo2p and Elo3p; protein increases in abundance and relative distribution to ER foci increases upon DNA replication stress; human homolog TECR implicated in nonsyndromic mental retardati…
YDL016C	YDL016C	4	425570	425872	C							Dubious open reading frame; unlikely to encode a functional protein, based on available experimental and comparative sequence data; partially overlaps the verified ORF CDC7/YDL153C, the catalytic subunit of a complex that regulates DNA replication
YDL017W	CDC7	4	424209	425732	W	serine/threonine protein kinase CDC7|SAS1|LSD6	4.20837	55			Failed_QC	DDK (Dbf4-dependent kinase) catalytic subunit; required for origin firing and replication fork progression in mitotic S phase through phosphorylation of Mcm2-7p complexes and Cdc45p; kinase activity correlates with cyclical DBF4 expression; required for pre-meiotic DNA replication, meiotic DSB formation, recruitment of monopolin complex to kinetochores during meiosis I, regulation of meiosis-spec…
YDL018C	ERP3	4	422833	423510	C		5.49972	265.5		246		Protein with similarity to Emp24p and Erv25p; member of the p24 family involved in ER to Golgi transport
YDL019C	OSH2	4	417663	421514	C	oxysterol-binding protein related protein OSH2	4.9572	114		184		Member of an oxysterol-binding protein family with seven members; in S. cerevisiae, family members have overlapping, redundant functions in sterol metabolism and collectively perform a function essential for viability; contains FFAT motif; interacts with ER anchor Scs2p at patches at the plasma membrane and at the nuclear envelope; regulated by sterol binding; OSH2 has a paralog, SWH1, that arose…
YDL020C	RPN4	4	415113	416708	C	stress-regulated transcription factor RPN4|UFD5|SON1	5.94391		Abundance_Low		Abundance_Low	Transcription factor that stimulates expression of proteasome genes; Rpn4p levels are in turn regulated by the 26S proteasome in a negative feedback control mechanism; RPN4 is transcriptionally regulated by various stress responses; relative distribution to the nucleus increases upon DNA replication stress
YDL021W	GPM2	4	413953	414888	W	phosphoglycerate mutase family protein GPM2	5.50128		Abundance_Low		Abundance_Low	Homolog of Gpm1p phosphoglycerate mutase; converts 3-phosphoglycerate to 2-phosphoglycerate in glycolysis; may be non-functional; GPM2 has a paralog, GPM3, that arose from the whole genome duplication
YDL022C-A	YDL022C-A	4	409808	410056	C							Protein of unknown function; SWAT-GFP and mCherry fusion proteins localize to the cytosol; partially overlaps the verified gene DIA3; identified by fungal homology and RT-PCR; mRNA identified as translated by ribosome profiling data
YDL022W	GPD1	4	411825	413000	W	glycerol-3-phosphate dehydrogenase (NAD(+)) GPD1|OSR5|OSG1|HOR1|DAR1	8.02185	2206		2870.5		NAD-dependent glycerol-3-phosphate dehydrogenase; key enzyme of glycerol synthesis, essential for growth under osmotic stress; expression regulated by high-osmolarity glycerol response pathway; protein abundance increases in response to DNA replication stress; constitutively inactivated via phosphorylation by the protein kinases Ypk1p and Ypk2p, dephosphorylation increases catalytic activity; for…
YDL023C	YDL023C	4	411761	412081	C	SRF4						Dubious open reading frame; unlikely to encode a functional protein, based on available experimental and comparative sequence data; not conserved in other Saccharomyces species; overlaps the verified gene GPD1; deletion confers sensitivity to GSAO; deletion in cyr1 mutant results in loss of stress resistance
YDL024C	DIA3	4	408451	409857	C	putative acid phosphatase DIA3	1.68068					Protein of unknown function; involved in invasive and pseudohyphal growth
YDL025C	RTK1	4	405344	407206	C	putative serine/threonine protein kinase RTK1	5.12493	84		302		Putative protein kinase, potentially phosphorylated by Cdc28p; interacts with ribosome biogenesis factors, Cka2, Gus1 and Arc1; protein abundance increases in response to DNA replication stress
YDL025W-A	YDL025W-A	4	405410	405514	W							Dubious open reading frame; unlikely to encode a functional protein, based on available experimental and comparative sequence data; completely overlaps the ORF YDL025C; identified by gene-trapping, microarray expression analysis, and genome-wide homology searching
YDL026W	YDL026W	4	404749	405060	W							Dubious open reading frame; unlikely to encode a functional protein, based on available experimental and comparative sequence data
YDL027C	MRX9	4	403695	404957	C		5.5339		Abundance_Low		Abundance_Low	Protein that associates with mitochondrial ribosome; the authentic, non-tagged protein is detected in highly purified mitochondria in high-throughput studies; YDL027C is not an essential gene
YDL028C	MPS1	4	400997	403291	C	serine/threonine/tyrosine protein kinase MPS1|PAC8|RPK1	4.9283		Abundance_Low		Abundance_Low	Dual-specificity kinase; autophosphorylation required for function; required for spindle pole body (SPB) duplication and spindle checkpoint function; contributes to bi-orientation by promoting formation of force-generating kinetochore-microtubule attachments in meiosis I; substrates include SPB proteins Spc42p, Spc110p, and Spc98p, mitotic exit network protein Mob1p, kinetochore protein Cnn1p, an…
YDL029W	ARP2	4	399340	400638	W	actin-related protein 2|ACT2	7.98085		Failed_QC		No_Measurement	Essential component of the Arp2/3 complex; Arp2/3 is a highly conserved actin nucleation center required for the motility and integrity of actin patches; involved in endocytosis and membrane growth and polarity; required for efficient Golgi-to-ER trafficking in COPI mutants
YDL030W	PRP9	4	397537	399129	W	SF3a splicing factor complex subunit PRP9	4.7649		Abundance_Low		Abundance_Low	Subunit of the SF3a splicing factor complex; required for spliceosome assembly; acts after the formation of the U1 snRNP-pre-mRNA complex
YDL031W	DBP10	4	394217	397204	W	putative ATP-dependent RNA helicase DBP10	6.24777					Putative ATP-dependent RNA helicase of the DEAD-box protein family; constituent of 66S pre-ribosomal particles; essential protein involved in ribosome biogenesis
YDL032W	YDL032W	4	393690	394001	W							Dubious open reading frame; unlikely to encode a functional protein, based on available experimental and comparative sequence data; partially overlaps verified gene SLM3/YDL033C; YDL032W is not an essential gene
YDL033C	SLM3	4	392659	393912	C	tRNA-5-taurinomethyluridine 2-sulfurtransferase|MTU1|MTO2	3.95797		Abundance_Low		Abundance_Low	tRNA-specific 2-thiouridylase; responsible for 2-thiolation of the wobble base of mitochondrial tRNAs; human homolog TRMU is implicated in myoclonus epilepsy associated with ragged red fibers (MERRF), and can complement yeast null mutant
YDL034W	YDL034W	4	391783	392127	W							Dubious open reading frame; unlikely to encode a functional protein, based on available experimental and comparative sequence data; partially overlaps with verified gene GPR1/YDL035C; YDL034W is not an essential gene
YDL035C	GPR1	4	389172	392057	C		5.2513					Plasma membrane G protein coupled receptor (GPCR); interacts with the heterotrimeric G protein alpha subunit, Gpa2p, and with Plc1p; sensor that integrates nutritional signals with the modulation of cell fate via PKA and cAMP synthesis
YDL036C	PUS9	4	387513	388901	C	pseudouridine synthase PUS9	4.94013		Abundance_Low		Abundance_Low	Mitochondrial tRNA:pseudouridine synthase; catalyzes the formation of pseudouridine at position 32 in mitochondrial tRNAs; contains an N-terminal mitochondrial targeting sequence; PUS9 has a paralog, RIB2, that arose from the whole genome duplication
YDL037C	BSC1	4	384601	385587	C							Protein of unconfirmed function; similar to cell surface flocculin Flo11p; ORF exhibits genomic organization compatible with a translational readthrough-dependent mode of expression; in W303 strain one continuous open reading frame comprising of YDL037C, the intergenic region and YDL039C encodes the gene IMI1
YDL039C	PRM7	4	381985	384081	C	pheromone-regulated protein PRM7|YDL038C	2.72687					Pheromone-regulated protein; predicted to have one transmembrane segment; promoter contains Gcn4p binding elements; in W303 strain one continuous open reading frame comprising of YDL037C, the intergenic region and YDL039C encodes the IMI1
YDL040C	NAT1	4	378874	381438	C	peptide alpha-N-acetyltransferase complex A subunit NAT1|NAA15|AAA1	6.35463	717.5		629		Subunit of protein N-terminal acetyltransferase NatA; NatA comprised of Nat1p, Ard1p, and Nat5p; N-terminally acetylates many proteins to influence multiple processes such as cell cycle progression, heat-shock resistance, mating, sporulation, telomeric silencing and early stages of mitophagy; orthologous to human NAA15; expression of both human NAA10 and NAA15 functionally complements ard1 nat1 d…
YDL041W	YDL041W	4	378102	378455	W							Dubious open reading frame; unlikely to encode a functional protein, based on available experimental and comparative sequence data; overlaps the verified gene SIR2/YDL042C
YDL042C	SIR2	4	376757	378445	C	NAD-dependent histone deacetylase SIR2|MAR1	5.34054	62			Abundance_Low	Conserved NAD+ dependent histone deacetylase of the Sirtuin family; deacetylation targets are primarily nuclear proteins; required for telomere hypercluster formation in quiescent yeast cells; involved in regulation of lifespan; plays roles in silencing at HML, HMR, telomeres, and rDNA; negatively regulates initiation of DNA replication; functions as regulator of autophagy like mammalian homolog …
YDL043C	PRP11	4	375680	376480	C	RNA11	5.35014		Abundance_Low		Abundance_Low	Subunit of the SF3a splicing factor complex; required for spliceosome assembly
YDL044C	MTF2	4	373967	375289	C	NAM1	4.78333		Abundance_Low		Abundance_Low	Mitochondrial protein that interacts with mitochondrial RNA polymerase; interacts with an N-terminal region of mitochondrial RNA polymerase (Rpo41p) and couples RNA processing and translation to transcription
YDL045C	FAD1	4	372688	373608	C	FMN adenylyltransferase	5.77541		Abundance_Low		Abundance_Low	Flavin adenine dinucleotide (FAD) synthetase; performs the second step in synthesis of FAD from riboflavin; mutation is functionally complemented by human FLAD1
YDL045W-A	MRP10	4	372248	372535	W	mitochondrial 37S ribosomal protein YmS-T|YmS-T			Abundance_Low		Abundance_Low	Mitochondrial ribosomal protein of the small subunit; contains twin cysteine-x9-cysteine motifs; oxidized by Mia40p during import into mitochondria
YDL046W	NPC2	4	371240	371761	W	sterol transporter	8.11983	74.5		58.9		Sterol transport protein and functional homolog of human NPC2/He1; human NPC2 is a cholesterol-binding protein whose deficiency causes Niemann-Pick type C2 disease involving retention of cholesterol in lysosomes; yeast NPC2 can complement mutations in human NPC2
YDL047W	SIT4	4	369771	370706	W	type 2A-related serine/threonine-protein phosphatase SIT4|PPH1	7.01813	166.5		114.5		Ceramide-activated, type 2A-related serine-threonine phosphatase; functions in G1/S transition of mitotic cycle; controls lifespan, mitochondrial function, cell cycle progression by regulating HXK2 phosphorylation; regulator of COPII coat dephosphorylation; required for ER to Golgi traffic; interacts with Hrr25p kinase; cytoplasmic and nuclear protein that modulates functions mediated by Pkc1p in…
YDL048C	STP4	4	366739	368211	C		5.87209		Abundance_Low		Abundance_Low	Protein containing a Kruppel-type zinc-finger domain; similar to Stp1p, Stp2p; predicted transcription factor; relative distribution to the nucleus increases upon DNA replication stress; STP4 has a paralog, STP3, that arose from the whole genome duplication
YDL049C	KNH1	4	365068	365874	C		5.75882					Protein with similarity to Kre9p; Kre9p is involved in cell wall beta 1,6-glucan synthesis; overproduction suppresses growth defects of a kre9 null mutant; required for propionic acid resistance
YDL050C	YDL050C	4	364446	364817	C							Dubious open reading frame; unlikely to encode a functional protein, based on available experimental and comparative sequence data
YDL051W	LHP1	4	363952	364779	W	YLA1|LAH1	7.97071	517		370.5		RNA binding protein required for maturation of tRNA and U6 snRNA; acts as a molecular chaperone for RNAs transcribed by polymerase III; homologous to human La (SS-B) autoantigen
YDL052C	SLC1	4	362672	363583	C	1-acylglycerol-3-phosphate O-acyltransferase SLC1	6.46379	951		671		1-acyl-sn-glycerol-3-phosphate acyltransferase; catalyzes the acylation of lysophosphatidic acid to form phosphatidic acid, a key intermediate in lipid metabolism; enzymatic activity detected in lipid particles and microsomes
YDL053C	PBP4	4	361699	362256	C		6.56196	247		202.9		Pbp1p binding protein; interacts strongly with Pab1p-binding protein 1 (Pbp1p) in the yeast two-hybrid system; also interacts with Lsm12p in a copurification assay; relative distribution to the nucleus increases upon DNA replication stress
YDL054C	MCH1	4	359825	361285	C		5.13534		Abundance_Low		Abundance_Low	Protein with similarity to mammalian monocarboxylate permeases; monocarboxylate permeases are involved in transport of monocarboxylic acids across the plasma membrane but mutant is not deficient in monocarboxylate transport
YDL055C	PSA1	4	355674	356759	C	mannose-1-phosphate guanylyltransferase|SRB1|VIG9|MPG1	10.8759	23965.5		14607		GDP-mannose pyrophosphorylase (mannose-1-phosphate guanyltransferase); synthesizes GDP-mannose from GTP and mannose-1-phosphate in cell wall biosynthesis; required for normal cell wall structure
YDL056W	MBP1	4	352877	355378	W	transcription factor MBP1	5.3123		Abundance_Low		Abundance_Low	Transcription factor; involved in regulation of cell cycle progression from G1 to S phase, forms a complex with Swi6p that binds to MluI cell cycle box regulatory element in promoters of DNA synthesis genes
YDL057W	YDL057W	4	351434	352420	W		4.7245					Putative protein of unknown function; YDL057W is not an essential gene
YDL058W	USO1	4	345665	351037	W	INT1	4.74566	252		136.2		Essential protein involved in vesicle-mediated ER to Golgi transport; binds membranes and functions during vesicle docking to the Golgi; required for assembly of the ER-to-Golgi SNARE complex
YDL059C	RAD59	4	344237	344953	C		6.20336		Abundance_Low		Abundance_Low	Protein involved DNA double-strand break repair; repairs breaks in DNA during vegetative growth via recombination and single-strand annealing; anneals complementary single-stranded DNA; forms nuclear foci upon DNA replication stress; required for loading of Rad52p to DSBs; regulates replication fork progression in DNA ligase I-deficient cells; paralog of Rad52p
YDL060W	TSR1	4	341619	343985	W		6.33304	410.5			Failed_QC	Protein required for processing of 20S pre-rRNA in the cytoplasm; associates with pre-40S ribosomal particles; inhibits the premature association of 60S subunits with assembling 40S subunits in the cytoplasm; similar to Bms1p; relocalizes from nucleus to cytoplasm upon DNA replication stress
YDL061C	RPS29B	4	340628	340798	C	uS14|ribosomal 40S subunit protein S29B|S14|YS29|S36B|S29B|YS29B	10.4652	2578.5		1961.6		Protein component of the small (40S) ribosomal subunit; homologous to mammalian ribosomal protein S29 and bacterial S14; RPS29B has a paralog, RPS29A, that arose from the whole genome duplication
YDL062W	YDL062W	4	339857	340282	W							Dubious open reading frame; unlikely to encode a functional protein, based on available experimental and comparative sequence data; partially overlaps uncharacterized ORF YDL063C; YDL062W is not essential
YDL063C	SYO1	4	338272	340134	C		5.96497	139.5			Abundance_Low	Transport adaptor or symportin; facilitates synchronized nuclear coimport of the two 5S-rRNA binding proteins Rpl5p and Rpl11p; binds to nascent Rpl5p during translation; required for biogenesis of the large ribosomal subunit; green fluorescent protein (GFP)-fusion protein localizes to the cytoplasm and nucleus
YDL064W	UBC9	4	337487	338070	W	E2 SUMO-conjugating protein UBC9	7.19378	588.5		343.5		SUMO-conjugating enzyme involved in the Smt3p conjugation pathway; nuclear protein required for S- and M-phase cyclin degradation and mitotic control; involved in proteolysis mediated by the anaphase-promoting complex cyclosome (APCC)
YDL065C	PEX19	4	336249	337277	C	PAS12	6.35354	202.5		176		Chaperone and import receptor for newly-synthesized class I PMPs; binds peroxisomal membrane proteins (PMPs) in the cytoplasm and delivers them to the peroxisome for subsequent insertion into the peroxisomal membrane; interacts with Myo2p and contributes to peroxisome partitioning
YDL066W	IDP1	4	334835	336121	W	isocitrate dehydrogenase (NADP(+)) IDP1	7.33935	645.5		1856.5		Mitochondrial NADP-specific isocitrate dehydrogenase; catalyzes the oxidation of isocitrate to alpha-ketoglutarate; not required for mitochondrial respiration and may function to divert alpha-ketoglutarate to biosynthetic processes
YDL067C	COX9	4	334217	334396	C	cytochrome c oxidase subunit VIIa	8.64859		Abundance_Low		Abundance_Low	Subunit VIIa of cytochrome c oxidase (Complex IV); Complex IV is the terminal member of the mitochondrial inner membrane electron transport chain
YDL068W	YDL068W	4	333500	333829	W							Dubious open reading frame; unlikely to encode a functional protein, based on available experimental and comparative sequence data
YDL069C	CBS1	4	333121	333810	C		4.50718					Mitochondrial translational activator of the COB mRNA; membrane protein that interacts with translating ribosomes, acts on the COB mRNA 5'-untranslated leader
YDL070W	BDF2	4	331024	332940	W		7.44927	152		72.5		Protein involved in transcription initiation; acts at TATA-containing promoters; associates with the basal transcription factor TFIID; contains two bromodomains; corresponds to the C-terminal region of mammalian TAF1; redundant with Bdf1p; protein abundance increases in response to DNA replication stress; BDF2 has a paralog, BDF1, that arose from the whole genome duplication
YDL071C	YDL071C	4	330666	331040	C	IRC1	1.00328					Dubious open reading frame; unlikely to encode a functional protein, based on available experimental and comparative sequence data; partially overlaps the verified ORF BDF2/YDL070W
YDL072C	YET3	4	329836	330447	C		7.546	692.5		650		Protein of unknown function; YET3 null mutant decreases the level of secreted invertase; homolog of human BAP31 protein; protein abundance increases in response to DNA replication stress
YDL073W	AHK1	4	326613	329567	W		4.94378					Scaffold protein in the HKR1 sub-branch of the Hog1p-signaling pathway; physically interacts with the cytoplasmic domain of Hkr1p, and with Sho1p, Pbs2p, and Ste11p; prevents cross-talk signaling from Hkr1p of the osmotic stress MAPK cascade to the Kss1p MAPK cascade; non-essential gene
YDL074C	BRE1	4	324047	326149	C	E3 ubiquitin-protein ligase BRE1	6.40187	113.5		90.5		E3 ubiquitin ligase; forms heterodimer with Rad6p to regulate K63 polyubiquitination in response to oxidative stress and to monoubiquinate histone H2B-K123, which is required for the subsequent methylation of histone H3-K4 and H3-K79; required for DSBR, transcription, silencing, and checkpoint control; interacts with RNA-binding protein Npl3p, linking histone ubiquitination to mRNA processing; Br…
YDL075W	RPL31A	4	322226	322988	W	eL31|ribosomal 60S subunit protein L31A|L31e|YL28|L34A|L31A|RPL34	11.4482					Ribosomal 60S subunit protein L31A; associates with karyopherin Sxm1p; loss of both Rpl31p and Rpl39p confers lethality; homologous to mammalian ribosomal protein L31, no bacterial homolog; RPL31A has a paralog, RPL31B, that arose from the whole genome duplication
YDL076C	RXT3	4	320668	321552	C		5.65759	64.5		66.5		Component of the Rpd3L histone deacetylase complex; involved in histone deacetylation; protein abundance increases in response to DNA replication stress
YDL077C	VAM6	4	316971	320120	C	VPS39|VPL22|VPL18|CVT4	4.05451		Abundance_Low		Abundance_Low	Guanine nucleotide exchange factor for the GTPase Gtr1p; subunit of the HOPS endocytic tethering complex; vacuole membrane protein; functions as a Rab GTPase effector, interacting with both GTP- and GDP-bound conformations of Ypt7p; facilitates tethering and promotes membrane fusion events at the late endosome and vacuole; required for both membrane and protein trafficking; component of vacuole-m…
YDL078C	MDH3	4	315357	316388	C	malate dehydrogenase MDH3	8.00901	274.5		270.5		Peroxisomal malate dehydrogenase; catalyzes interconversion of malate and oxaloacetate; involved in the glyoxylate cycle
YDL079C	MRK1	4	312951	314748	C	putative serine/threonine protein kinase MRK1	2.52322					Glycogen synthase kinase 3 (GSK-3) homolog; one of four GSK-3 homologs in S. cerevisiae that function to activate Msn2p-dependent transcription of stress responsive genes and that function in protein degradation; MRK1 has a paralog, RIM11, that arose from the whole genome duplication
YDL080C	THI3	4	310642	312471	C	branched-chain-2-oxoacid decarboxylase THI3|KID1	5.26715		Abundance_Low		Abundance_Low	Regulatory protein that binds Pdc2p and Thi2p transcription factors; activates thiamine biosynthesis transcription factors Pdc2p and Thi2p by binding to them, but releases and de-activates them upon binding to thiamine pyrophosphate (TPP), the end product of the pathway; has similarity to decarboxylases but enzymatic activity is not detected
YDL081C	RPP1A	4	309802	310122	C	P1A|ribosomal protein P1A|RPLA1	11.2947	6605		5304.9		Ribosomal stalk protein P1 alpha; involved in the interaction between translational elongation factors and the ribosome; free (non-ribosomal) P1 stimulates the phosphorylation of the eIF2 alpha subunit (Sui2p) by Gcn2p; accumulation of P1 in the cytoplasm is regulated by phosphorylation and interaction with the P2 stalk component
YDL082W	RPL13A	4	308424	309388	W	eL13|ribosomal 60S subunit protein L13A|L13e|L13A	10.0021	4069.5		2970.5		Ribosomal 60S subunit protein L13A; not essential for viability; homologous to mammalian ribosomal protein L13, no bacterial homolog; RPL13A has a paralog, RPL13B, that arose from the whole genome duplication
YDL083C	RPS16B	4	306926	307789	C	uS9|ribosomal 40S subunit protein S16B|S9|rp61R|S16B	10.7862	415		435.5		Protein component of the small (40S) ribosomal subunit; homologous to mammalian ribosomal protein S16 and bacterial S9; RPS16B has a paralog, RPS16A, that arose from the whole genome duplication
YDL084W	SUB2	4	305237	306577	W	ATP-dependent RNA helicase SUB2	9.17859		Abundance_Low		Abundance_Low	Component of the TREX complex required for nuclear mRNA export; member of the DEAD-box RNA helicase superfamily and is involved in early and late steps of spliceosome assembly; homolog of the human splicing factor hUAP56; relocalizes from nucleus to cytoplasm upon DNA replication stress
YDL085C-A	YDL085C-A	4	302464	302670	C			258.5		278.6		Putative protein of unknown function; green fluorescent protein (GFP)-fusion protein localizes to the cytoplasm and nucleus
YDL085W	NDE2	4	303211	304848	W	NADH-ubiquinone reductase (H(+)-translocating) NDE2|NDH2	2.8622					Mitochondrial external NADH dehydrogenase; catalyzes the oxidation of cytosolic NADH; Nde1p and Nde2p are involved in providing the cytosolic NADH to the mitochondrial respiratory chain; NDE2 has a paralog, NDE1, that arose from the whole genome duplication
YDL086C-A	YDL086C-A	4	301655	302089	C							Dubious open reading frame; unlikely to encode a functional protein, based on available experimental and comparative sequence data; overlaps uncharacterized ORF YDL086W; identified by gene-trapping, microarray expression analysis, and genome-wide homology searching
YDL086W	YDL086W	4	301413	302234	W	carboxymethylenebutenolidase	7.4109					Putative carboxymethylenebutenolidase; the authentic, non-tagged protein is detected in highly purified mitochondria in high-throughput studies; YDL086W is not an essential gene
YDL087C	LUC7	4	300214	300999	C	EPE1|EXM2	4.31673		Abundance_Low		Abundance_Low	Essential protein associated with the U1 snRNP complex; splicing factor involved in recognition of 5' splice site; contains two zinc finger motifs; N-terminal zinc finger binds pre-mRNA; relocalizes to the cytosol in response to hypoxia
YDL088C	ASM4	4	298417	300003	C	FG-nucleoporin ASM4|NUP59	5.68072	173		176.5		FG-nucleoporin component of central core of nuclear pore complex (NPC); contributes directly to nucleocytoplasmic transport; induces membrane tubulation, which may contribute to nuclear pore assembly; ASM4 has a paralog, NUP53, that arose from the whole genome duplication
YDL089W	NUR1	4	296820	298274	W		4.43848		Abundance_Low		Abundance_Low	Protein involved in regulation of mitotic exit; dephosphorylation target of Cdc14p in anaphase, which promotes timely rDNA segregation and allows mitotic progression; interacts with Csm1p, Lrs4p; required for rDNA repeat stability; null mutant causes increase in unequal sister-chromatid exchange; GFP-fusion protein localizes to the nuclear periphery, possible Cdc28p substrate
YDL090C	RAM1	4	295034	296329	C	protein farnesyltransferase|STE16|SGP2|SCG2|FUS8|DPR1	4.7932		Failed_QC		Failed_QC/Abundance_Low	Beta subunit of the CAAX farnesyltransferase (FTase); this complex prenylates the a-factor mating pheromone and Ras proteins; required for the membrane localization of Ras proteins and a-factor; homolog of the mammalian FTase beta subunit
YDL091C	UBX3	4	293392	294759	C		5.08398		Abundance_Low		Abundance_Low	Clathrin-coated vesicle component, regulator of endocytosis; copurifies with the DSC ubiquitin ligase complex; UBX (ubiquitin regulatory X) domain-containing protein that interacts with Cdc48p; required for efficient clathrin-mediated endocytosis; ortholog of fission yeast Ucp10
YDL092W	SRP14	4	292781	293221	W	RNA-binding signal recognition particle subunit SRP14	7.57196	332.5		275.5		Signal recognition particle (SRP) subunit; interacts with the RNA component of SRP to form the Alu domain, which is the region of SRP responsible for arrest of nascent chain elongation during membrane targeting; homolog of mammalian SRP14
YDL093W	PMT5	4	289909	292140	W	putative dolichyl-phosphate-mannose-protein mannosyltransferase PMT5	4.75972					Protein O-mannosyltransferase; transfers mannose residues from dolichyl phosphate-D-mannose to protein serine/threonine residues; acts in a complex with Pmt3p, can instead interact with Pmt2p in some conditions; target for new antifungals
YDL094C	YDL094C	4	289572	290081	C							Dubious open reading frame; unlikely to encode a functional protein, based on available experimental and comparative sequence data; partially overlaps verfied gene PMT5/YDL093W; YDL094C is not essential
YDL095W	PMT1	4	287059	289512	W	dolichyl-phosphate-mannose-protein mannosyltransferase PMT1	7.1707	111.5		93.5		Protein O-mannosyltransferase of the ER membrane; transfers mannose from dolichyl phosphate-D-mannose to protein serine and threonine residues; 1 of 7 related proteins involved in O-glycosylation which is essential for cell wall rigidity; involved in ER quality control; amino terminus faces cytoplasm, carboxyl terminus faces ER lumen
YDL096C	OPI6	4	286998	287324	C		0.815691					Dubious open reading frame; unlikely to encode a functional protein, based on available experimental and comparative sequence data; partially overlaps verified gene PMT1/YDL095W; YDL096C is not essential
YDL097C	RPN6	4	285391	286695	C	proteasome regulatory particle lid subunit RPN6|NAS4	7.83448	677		446.5		Essential, non-ATPase regulatory subunit of the 26S proteasome lid; required for the assembly and activity of the 26S proteasome; the human homolog (S9 protein) partially rescues Rpn6p depletion; protein abundance increases in response to DNA replication stress
YDL098C	SNU23	4	284581	285165	C	U4/U6-U5 snRNP complex subunit SNU23	5.18509		Abundance_Low		Abundance_Low	Component of the U4/U6.U5 snRNP complex; involved in mRNA splicing via spliceosome
YDL099W	BUG1	4	283419	284444	W		6.90027	209.5		196.5		Cis-golgi localized protein involved in ER to Golgi transport; forms a complex with the mammalian GRASP65 homolog, Grh1p; mutants are compromised for the fusion of ER-derived vesicles with Golgi membranes
YDL100C	GET3	4	282112	283176	C	guanine nucleotide exchange factor GET3|ARR4	8.35411	521.5		378		Guanine nucleotide exchange factor for Gpa1p; amplifies G protein signaling; functions as a chaperone under ATP-depleted oxidative stress conditions; subunit of GET complex, involved in ATP dependent Golgi to ER trafficking and insertion of tail-anchored (TA) proteins into ER membrane under non-stress conditions; binds as dimer to transmembrane domain (TMD) cargo, shielding TMDs from aqueous solv…
YDL101C	DUN1	4	280307	281848	C	serine/threonine protein kinase DUN1	4.95755		Abundance_Low		Abundance_Low	Cell-cycle checkpoint S/T protein kinase; required for transient G2/M arrest after DNA damage, damage-induced transcription, and nuclear-to-cytoplasmic redistribution of Rnr2p-Rnr4p after genotoxic stress and iron deprivation; phosphorylates repair protein Rad55p, transcriptional repressor Sml1p, superoxide dismutase, and ribonucleotide reductase inhibitors Crt1p and Dif1p; functions in the Mec1p…
YDL102W	POL3	4	276872	280165	W	DNA-directed DNA polymerase delta POL3|CDC2|TEX1|HPR6	4.68159	221.5		200.5		Catalytic subunit of DNA polymerase delta; required for chromosomal DNA replication during mitosis and meiosis, intragenic recombination, repair of double strand DNA breaks, and DNA replication during nucleotide excision repair (NER)
YDL103C	QRI1	4	275148	276581	C	UDP-N-acetylglucosamine diphosphorylase|UAP1	6.07954	201		195		UDP-N-acetylglucosamine pyrophosphorylase; catalyzes the formation of UDP-N-acetylglucosamine (UDP-GlcNAc), which is important in cell wall biosynthesis, protein N-glycosylation, and GPI anchor biosynthesis; protein abundance increases in response to DNA replication stress
YDL104C	QRI7	4	273653	274876	C	putative N(6)-L-threonylcarbamoyladenine synthase	4.15447		Abundance_Low		Abundance_Low	Protein involved in threonylcarbamoyl adenosine biosynthesis; Sua5p and Qri7p are necessary and sufficient for RNA t6A modification in vitro; highly conserved mitochondrial protein; essential for t6A modification of mitochondrial tRNAs that decode ANN codons; similar to Kae1p and E. coli YgjD, both of which are also required for tRNA t6A modification; when directed to the cytoplasm, complements t…
YDL105W	NSE4	4	272389	273597	W	Smc5-Smc6 complex subunit NSE4|QRI2	4.6021		Abundance_Low		Abundance_Low	Component of the SMC5-SMC6 complex; this complex plays a key role in the removal of X-shaped DNA structures that arise between sister chromatids during DNA replication and repair
YDL106C	PHO2	4	270222	271901	C	phoB|GRF10|BAS2	5.11602		Abundance_Low		Abundance_Low	Homeobox transcription factor; regulatory targets include genes involved in phosphate metabolism; binds cooperatively with Pho4p to the PHO5 promoter; phosphorylation of Pho2p facilitates interaction with Pho4p; relocalizes to the cytosol in response to hypoxia
YDL107W	MSS2	4	268921	269976	W		4.77474		Abundance_Low		Abundance_Low	Peripherally bound inner membrane protein of the mitochondrial matrix; involved in membrane insertion of C-terminus of Cox2p, interacts genetically and physically with Cox18p
YDL108W	KIN28	4	267698	268699	W	TFIIH complex serine/threonine-protein kinase subunit KIN28	5.62882	46.5			Abundance_Low	Serine/threonine protein kinase, subunit of transcription factor TFIIH; involved in transcription initiation at RNA polymerase II promoters; phosphorylates Ser5 residue of the PolII C-terminal domain (CTD) at gene promoters; relocalizes to the cytosol in response to hypoxia
YDL109C	YDL109C	4	265258	267201	C	putative lipase	3.8231					Putative lipase; involved in lipid metabolism; not an essential gene; YDL109C has a paralog, ROG1, that arose from the whole genome duplication
YDL110C	TMA17	4	264512	264964	C	ADC17	7.81958	205.5		281.7		ATPase dedicated chaperone that adapts proteasome assembly to stress; Tma17p is induced upon stress; interacts with Rpt6p to assist its pairing to Rpt3p and early steps in proteasome biogenesis; associates with ribosomes; heterozygous deletion demonstrated increases in chromosome instability in a rad9 deletion background; protein abundance is decreased upon intracellular iron depletion
YDL111C	RRP42	4	263313	264110	C	exosome non-catalytic core subunit RRP42	6.88636	194.5		135		Exosome non-catalytic core component; involved in 3'-5' RNA processing and degradation in both the nucleus and the cytoplasm; has similarity to E. coli RNase PH and to human hRrp42p (EXOSC7)
YDL112W	TRM3	4	258915	263225	W	tRNA (guanosine(18)-2'-O)-methyltransferase	4.90843		Failed_QC	60.5		2'-O-ribose methyltransferase; catalyzes the ribose methylation of the guanosine nucleotide at position 18 of tRNAs
YDL113C	ATG20	4	256633	258555	C	CVT20|SNX42	4.96967		Abundance_Low	57		Sorting nexin family member; required for the cytoplasm-to-vacuole targeting (Cvt) pathway and for endosomal sorting; has a Phox homology domain that binds phosphatidylinositol-3-phosphate; interacts with Snx4p; potential Cdc28p substrate
YDL114W	YDL114W	4	255604	256530	W	short-chain dehydrogenase/reductase						Putative short-chain dehydrogenase/reductase; YDL114W is not an essential gene
YDL114W-A	YDL114W-A	4	254935	255048	W							Dubious open reading frame; unlikely to encode a functional protein, based on available experimental and comparative sequence data; identified based on homology to hemiascomycetous yeasts
YDL115C	IWR1	4	253995	255126	C		5.82151		Abundance_Low		Abundance_Low	RNA polymerase II transport factor, conserved from yeast to humans; also has a role in transporting RNA polymerase III into the nucleus; interacts with most of the RNAP II subunits; nucleo-cytoplasmic shuttling protein; deletion causes hypersensitivity to K1 killer toxin; protein increases in abundance and relocalizes from nucleus to cytoplasm upon DNA replication stress
YDL116W	NUP84	4	251566	253746	W		5.86083	298		227.4		Subunit of the Nup84p subcomplex of the nuclear pore complex (NPC); contributes to nucleocytoplasmic transport and NPC biogenesis; also plays roles in several processes that may require localization of genes or chromosomes at the nuclear periphery, including double-strand break repair, transcription and chromatin silencing; homologous to human NUP107
YDL117W	CYK3	4	248581	251238	W		5.08046		Abundance_Low		Abundance_Low	SH3-domain protein located in the bud neck and cytokinetic actin ring; relocalizes from bud neck to nucleus upon DNA replication stress; activates the chitin synthase activity of Chs2p during cytokinesis; suppressor of growth and cytokinesis defects of chs2 phospho-mutants
YDL118W	YDL118W	4	247302	247682	W							Dubious open reading frame, unlikely to encode a protein; overlaps almost completely with YDL119C; mutations that would affect both YDL118W and YDL119C confer defective telomere maintenance and are synthetically sick or lethal with alpha-synuclein
YDL119C	HEM25	4	246689	247612	C		4.57836		Abundance_Low	60		Mitochondrial glycine transporter; required for the transport of glycine into mitochondria for initiation of heme biosynthesis, with YMC1 acting as a secondary transporter; homolog of human SLC25A38, a mitochondrial glycine transporter associated with nonsyndromic autosomal recessive congenital sideroblastic anemia; human SLC25A38 can complement the heme deficiency associated with the null mutant…
YDL120W	YFH1	4	245923	246447	W	ferroxidase	6.0606	116.5			No_Measurement	Mitochondrial matrix iron chaperone; oxidizes and stores iron; interacts with Isu1p to promote Fe-S cluster assembly; mutation results in multiple Fe/S-dependent enzyme deficiencies; human frataxin homolog FXN is mutated in Friedrich's ataxia; human FTL gene can complement yeast yfh1 null mutant
YDL121C	YDL121C	4	245133	245582	C		7.24321	409.5		277.7		Putative protein of unknown function; green fluorescent protein (GFP)-fusion protein localizes to the endoplasmic reticulum; YDL121C is not an essential protein
YDL122W	UBP1	4	242552	244981	W	ubiquitin-specific protease UBP1	6.41986	239.5		194		Ubiquitin-specific protease; removes ubiquitin from ubiquitinated proteins; cleaves at the C terminus of ubiquitin fusions irrespective of their size; capable of cleaving polyubiquitin chains
YDL123W	SNA4	4	241418	241840	W		5.90491	335		278.9		Protein of unknown function; localized to the vacuolar outer membrane; predicted to be palmitoylated
YDL124W	YDL124W	4	240259	241197	W	aldo-keto reductase superfamily protein	8.96061	464		577		NADPH-dependent alpha-keto amide reductase; reduces aromatic alpha-keto amides, aliphatic alpha-keto esters, and aromatic alpha-keto esters; member of the aldo-keto reductase (AKR) family; protein abundance increases in response to DNA replication stress
YDL125C	HNT1	4	239019	239606	C	adenosine 5'-monophosphoramidase	8.12814	602.5		460.1		Adenosine 5'-monophosphoramidase; interacts physically and genetically with Kin28p, a CDK and TFIIK subunit, and genetically with CAK1; member of histidine triad (HIT) superfamily of nucleotide-binding proteins; protein abundance increases in response to DNA replication stress; human homolog HINT1 can complement yeast hnt1 mutant
YDL126C	CDC48	4	236157	238664	C	AAA family ATPase CDC48	8.77913	2023		1576		AAA ATPase; subunit of polyUb-selective segregase complex involved in ERAD, INM-associated degradation (INMAD), mitotic spindle disassembly, macroautophagy, PMN, ribosome-associated degradation, ribophagy, homotypic ER membrane fusion, SCF complex disassembly, cell wall integrity during heat stress, and telomerase regulation; mobilizes membrane-anchored transcription factors by regulated Ub/prote…
YDL127W	PCL2	4	234927	235853	W	cyclin PCL2|CLN4	5.65404					Cyclin, interacts with cyclin-dependent kinase Pho85p; member of the Pcl1,2-like subfamily, involved in the regulation of polarized growth and morphogenesis and progression through the cell cycle; localizes to sites of polarized cell growth; PCL2 has a paralog, PCL9, that arose from the whole genome duplication
YDL128W	VCX1	4	232652	233887	W	MNR1|HUM1	6.84244	249		129.5		Vacuolar membrane antiporter with Ca2+/H+ and K+/H+ exchange activity; involved in control of cytosolic Ca2+ and K+ concentrations; has similarity to sodium/calcium exchangers, including the bovine Na+/Ca2+,K+ antiporter
YDL129W	YDL129W	4	231024	231899	W		3.79321		Abundance_Low		Abundance_Low	Protein of unknown function; green fluorescent protein (GFP)-fusion protein localizes to the cytoplasm and the nucleus; YDL129W is not an essential gene; relative distribution to the nucleus increases upon DNA replication stress
YDL130W	RPP1B	4	229906	230527	W	ribosomal protein P1B|YP1beta|P1B|L44'|Ax|RPLA3|RPL44'	10.6044	9142.5		7561		Ribosomal protein P1 beta; component of the ribosomal stalk, which is involved in interaction of translational elongation factors with ribosome; free (non-ribosomal) P1 stimulates the phosphorylation of the eIF2 alpha subunit (Sui2p) by Gcn2p; accumulation is regulated by phosphorylation and interaction with the P2 stalk component
YDL130W-A	STF1	4	229171	229431	W	ATPase-binding protein|AIS2		140		202.8		Protein involved in regulation of the mitochondrial F1F0-ATP synthase; Stf1p and Stf2p act as stabilizing factors that enhance inhibitory action of the Inh1p protein; protein abundance increases in response to DNA replication stress; STF1 has a paralog, INH1, that arose from the whole genome duplication
YDL131W	LYS21	4	227393	228715	W	homocitrate synthase LYS21	9.28907	691.5		2732.5		Homocitrate synthase isozyme; catalyzes the condensation of acetyl-CoA and alpha-ketoglutarate to form homocitrate, which is the first step in the lysine biosynthesis pathway; LYS21 has a paralog, LYS20, that arose from the whole genome duplication
YDL132W	CDC53	4	224304	226751	W	cullin CDC53	6.28413	111		71		Cullin; structural protein of SCF complexes (which also contain Skp1p, Cdc34p, Hrt1p and an F-box protein) involved in ubiquitination; SCF promotes the G1-S transition by targeting G1 cyclins and the Cln-CDK inhibitor Sic1p for degradation; human homolog CUL1 can complement yeast cdc53 null mutant
YDL133C-A	RPL41B	4	221724	221801	C	eL41|ribosomal 60S subunit protein L41B|L41e|YL41|L47B|L41B|YDL134C-A|RPL47B		6413.5		3744.2		Ribosomal 60S subunit protein L41B; comprises only 25 amino acids; rpl41a rpl41b double null mutant is viable; homologous to mammalian ribosomal protein L41, no bacterial homolog; RPL41B has a paralog, RPL41A, that arose from the whole genome duplication
YDL133W	SRF1	4	222427	223740	W		5.57241					Regulator of phospholipase D (Spo14p); interacts with Spo14p and regulates its catalytic activity; capable of buffering the toxicity of C16:0 platelet activating factor, a lipid that accumulates intraneuronally in Alzheimer's patients
YDL134C	PPH21	4	219662	220771	C	phosphoprotein phosphatase 2A catalytic subunit PPH21	7.32096	129.5		97.5		Catalytic subunit of protein phosphatase 2A (PP2A); functionally redundant with Pph22p; methylated at C terminus; forms alternate complexes with several regulatory subunits; involved in signal transduction and regulation of mitosis; forms nuclear foci upon DNA replication stress; PPH21 has a paralog, PPH22, that arose from the whole genome duplication
YDL135C	RDI1	4	218680	219288	C		7.49875	358		351.2		Rho GDP dissociation inhibitor; involved in the localization and regulation of Cdc42p and Rho1p; protein abundance increases in response to DNA replication stress
YDL136W	RPL35B	4	217600	218367	W	uL29|ribosomal 60S subunit protein L35B|L35B|L29|SOS2	10.2763	2790.5		1989		Ribosomal 60S subunit protein L35B; homologous to mammalian ribosomal protein L35 and bacterial L29; RPL35B has a paralog, RPL35A, that arose from the whole genome duplication
YDL137W	ARF2	4	216529	217074	W	Arf family GTPase ARF2	9.69864	164		103.5		ADP-ribosylation factor; GTPase of the Ras superfamily involved in regulation of coated formation vesicles in intracellular trafficking within the Golgi; ARF2 has a paralog, ARF1, that arose from the whole genome duplication; arf1 arf2 double null mutation is complemented by human ARF1, ARF4, ARF5, or ARF6
YDL138W	RGT2	4	213351	215642	W	glucose sensor	4.86664					Plasma membrane high glucose sensor that regulates glucose transport; low affinity sesnor that contains 12 predicted transmembrane segments and a long C-terminal tail required for hexose transporter induction; phosphorylation of the tail by Yck1p/Yck2p facilitates binding to the HXT co-repressors, Mth1p and Std1p; RGT2 has a paralog, SNF3, that arose from the whole genome duplication
YDL139C	SCM3	4	211375	212046	C		4.66062		Abundance_Low		Abundance_Low	Nonhistone component of centromeric chromatin; binds to histone H3 variant, Cse4p, and recruits it to centromeres; involved in the assembly and maintenance of Cse4-H4 at centromeres; required for kinetochore assembly and G2/M progression; may protect Cse4p from ubiquitination; homolog of mammalian HJURP
YDL140C	RPO21	4	205360	210561	C	DNA-directed RNA polymerase II core subunit RPO21|B220|SUA8|RPB220|RPB1	5.69823	1379		1011		RNA polymerase II largest subunit B220; part of central core; phosphorylation of C-terminal heptapeptide repeat domain regulates association with transcription and splicing factors; similar to bacterial beta-prime
YDL141W	BPL1	4	203039	205111	W	biotin--[acetyl-CoA-carboxylase] ligase BPL1|ACC2	5.211	155.5		156.5		Biotin:apoprotein ligase; covalently modifies proteins with the addition of biotin, required for acetyl-CoA carboxylase (Acc1p) holoenzyme formation; comparative analysis suggests that a mitochondrially targeted form may result from translation starting at a non-canonical codon upstream of the annotated start codon; human homolog HLCS can complement yeast BPL1 mutant
YDL142C	CRD1	4	201719	202570	C	cardiolipin synthase|CLS1	5.3496		Abundance_Low		Abundance_Low	Cardiolipin synthase; produces cardiolipin, which is a phospholipid of the mitochondrial inner membrane that is required for normal mitochondrial membrane potential and function and for correct integration of membrane-multispanning proteins into the mitochondrial outer membrane; required to maintain tubular mitochondrial morphology and functions in mitochondrial fusion; also required for normal v…
YDL143W	CCT4	4	199996	201582	W	chaperonin-containing T-complex subunit CCT4|ANC2|TCP4	7.63678					Subunit of the cytosolic chaperonin Cct ring complex; related to Tcp1p, required for the assembly of actin and tubulins in vivo
YDL144C	YDL144C	4	198662	199732	C		6.66153	89.5		88.5		Protein of unknown function; green fluorescent protein (GFP)-fusion protein localizes to the cytoplasm and nucleus; YDL144C is not an essential gene; protein abundance increases in response to DNA replication stress
YDL145C	COP1	4	194571	198176	C	coatomer subunit alpha|SOO1|RET1|SEC33	6.56592	1290		953.2		Alpha subunit of COPI vesicle coatomer complex; complex surrounds transport vesicles in the early secretory pathway
YDL146W	LDB17	4	192750	194225	W		4.29336		Abundance_Low	55		Protein involved in the regulation of endocytosis; transiently recruited to actin cortical patches in a SLA1-dependent manner after late coat component assembly; GFP-fusion protein localizes to the periphery, cytoplasm, bud, and bud neck
YDL147W	RPN5	4	190924	192261	W	proteasome regulatory particle lid subunit RPN5|NAS5	7.88748	1089.5		822.5		Subunit of the CSN and 26S proteasome lid complexes; similar to mammalian p55 subunit and to another S. cerevisiae regulatory subunit, Rpn7p; Rpn5p is an essential protein; the COP9 signalosome is also known as the CSN
YDL148C	NOP14	4	188154	190586	C	snoRNA-binding rRNA-processing protein NOP14|UTP2	6.22632					Nucleolar protein; forms a complex with Noc4p that mediates maturation and nuclear export of 40S ribosomal subunits; also present in the small subunit processome complex, which is required for processing of pre-18S rRNA
YDL149W	ATG9	4	184925	187918	W	autophagy protein ATG9|CVT6|APG9|CVT7|AUT9	3.62466					Transmembrane protein involved in forming Cvt and autophagic vesicles; cycles between the phagophore assembly site (PAS) and other cytosolic punctate structures, not found in autophagosomes; may be involved in membrane delivery to the PAS
YDL150W	RPC53	4	183343	184611	W	DNA-directed RNA polymerase III subunit C53|C53|RPC4	6.43035	196		176		RNA polymerase III subunit C53
YDL151C	BUD30	4	183318	183899	C							Dubious open reading frame; unlikely to encode a functional protein, based on available experimental and comparative sequence data; not conserved in closely related Saccharomyces species; 96% of ORF overlaps the verified gene RPC53; diploid mutant displays a weak budding pattern phenotype in a systematic assay
YDL152W	YDL152W	4	182822	183187	W			50			Abundance_Low	Dubious open reading frame; unlikely to encode a functional protein, based on available experimental and comparative sequence data; partially overlaps the verified ORF SAS10/YDL153C, a component of the small ribosomal subunit processosome
YDL153C	SAS10	4	181186	183018	C	rRNA-processing protein SAS10|UTP3	6.66847					Subunit of U3-containing Small Subunit (SSU) processome complex; involved in production of 18S rRNA and assembly of small ribosomal subunit; disrupts silencing when overproduced; mutant has increased aneuploidy tolerance; essential gene
YDL154W	MSH5	4	178334	181039	W	MutS family protein MSH5	1.90308					Protein of the MutS family; forms a dimer with Msh4p that facilitates crossovers between homologs during meiosis; msh5-Y823H mutation confers tolerance to DNA alkylating agents; homologs present in C. elegans and humans
YDL155W	CLB3	4	176773	178056	W	B-type cyclin CLB3	5.94032		Abundance_Low		Abundance_Low	B-type cyclin involved in cell cycle progression; activates Cdc28p to promote the G2/M transition; may be involved in DNA replication and spindle assembly; accumulates during S phase and G2, then targeted for ubiquitin-mediated degradation; relative distribution to the nucleus increases upon DNA replication stress; CLB3 has a paralog, CLB4, that arose from the whole genome duplication
YDL156W	CMR1	4	174918	176486	W		4.07141		Abundance_Low		Abundance_Low	Nuclear protein with a role in protein quality control; localizes to the intranuclear quality control compartment (INQ) in response to proteasome inhibition or DNA replication stress; INQ likely sequesters proteins involved in DNA metabolism for degradation or re-folding; DNA-binding protein with preference for UV-damaged DNA; contains three WD domains (WD-40 repeat); human ortholog WDR76 also ex…
YDL157C	YDL157C	4	174232	174588	C		7.47908		Abundance_Low	55.5		Putative protein of unknown function; the authentic, non-tagged protein is detected in highly purified mitochondria in high-throughput studies
YDL158C	YDL158C	4	173866	174174	C		2.49852					Dubious open reading frame; unlikely to encode a functional protein, based on available experimental and comparative sequence data
YDL159C-B	YDL159C-B	4	173056	173232	C	YDL159C-A						Putative protein of unknown function; identified by gene-trapping, microarray-based expression analysis, and genome-wide homology searching
YDL159W	STE7	4	172481	174028	W	mitogen-activated protein kinase kinase STE7	4.73569	83.5		55		Signal transducing MAP kinase kinase; involved in pheromone response where it phosphorylates Fus3p; involved in the pseudohyphal/invasive growth pathway where it phosphorylates of Kss1p; phosphorylated by Ste11p; degraded by ubiquitin pathway
YDL159W-A	YDL159W-A	4	172182	172313	W	YDL159W-B						Putative protein of unknown function; identified by sequence comparison with hemiascomycetous yeast species
YDL160C	DHH1	4	170410	171930	C	DExD/H-box ATP-dependent RNA helicase DHH1	4.51087	619.5		572.5		Cytoplasmic DEAD-box helicase, stimulates mRNA decapping; coordinates distinct steps in mRNA function and decay, interacting with both decapping and deadenylase complexes; role in translational repression, mRNA decay, and possibly mRNA export; interacts and cooperates with Ngr1p to promote specific mRNA decay; ATP- and RNA-bound form promotes processing body (PB) assembly, while ATPase stimulatio…
YDL160C-A	MHF2	4	169366	169608	C							Component of the heterotetrameric MHF histone-fold complex; in humans the MHF complex interacts with both DNA and Mph1p ortholog FANCM to stabilize and remodel blocked replication forks and repair damaged DNA; mhf2 srs2 double mutants are MMS hypersensitive; orthologous to human centromere constitutive-associated network (CCAN) subunit CENP-X, also known as MHF2
YDL161W	ENT1	4	167714	169078	W	epsin	6.48348	198.5		172.5		Epsin-like protein involved in endocytosis and actin patch assembly; functionally redundant with Ent2p; binds clathrin via a clathrin-binding domain motif at C-terminus; relocalizes from bud neck to cytoplasm upon DNA replication stress; ENT1 has a paralog, ENT2, that arose from the whole genome duplication
YDL162C	YDL162C	4	167359	167715	C							Dubious open reading frame; unlikely to encode a functional protein, based on available experimental and comparative sequence data; partially overlaps ENT1/YDL161W, a verified gene involved in endocytosis and actin cortical patch assembly
YDL163W	YDL163W	4	166956	167258	W							Dubious open reading frame; unlikely to encode a functional protein, based on available experimental and comparative sequence data; partially overlaps the verified gene CDC9/YDL164C encoding DNA ligase
YDL164C	CDC9	4	164987	167254	C	DNA ligase (ATP) CDC9|MMS8	5.23355		Failed_QC/Abundance_Low		Failed_QC	DNA ligase I found in nucleus and mitochondria; essential enzyme that joins Okazaki fragments during DNA replication; also acts in ribonucleotide excision repair, base excision repair, and recombination; DNA ligase I mutants trigger ubiquitination of PCNA at K107, facilitating Rad59p-mediated bypass of unligated Okazaki fragments; human homolog LIG1 can complement yeast cdc9 temperature-sensitive…
YDL165W	CDC36	4	164290	164865	W	CCR4-NOT core subunit CDC36|NOT2|DNA19	6.76755	110		110.4		Component of the CCR4-NOT core complex, involved in mRNA decapping; this complex has multiple roles in regulating mRNA levels including regulation of transcription and destabilizing mRNAs through deadenylation; basal transcription factor
YDL166C	FAP7	4	163449	164042	C	nucleoside-triphosphatase	6.84398	244.5		243.6		Essential NTPase required for small ribosome subunit synthesis; mediates processing of the 20S pre-rRNA at site D in the cytoplasm but associates only transiently with 43S preribosomes via Rps14p; complex with Rps14 is conserved between humans, yeast, and arches; may be the endonuclease for site D; depletion leads to accumulation of pre-40S ribosomes in 80S-like ribosomes; human TAF9 functionally…
YDL167C	NRP1	4	160995	163154	C		5.97005	161		80.5		Putative RNA binding protein of unknown function; localizes to stress granules induced by glucose deprivation; predicted to be involved in ribosome biogenesis
YDL168W	SFA1	4	159604	160764	W	bifunctional alcohol dehydrogenase/S-(hydroxymethyl)glutathione dehydrogenase|ADH5	7.49526	98.5		66		Bifunctional alcohol dehydrogenase and formaldehyde dehydrogenase; formaldehyde dehydrogenase activity is glutathione-dependent; functions in formaldehyde detoxification and formation of long chain and complex alcohols, regulated by Hog1p-Sko1p; protein abundance increases in response to DNA replication stress
YDL169C	UGX2	4	158064	158735	C		4.67793					Protein of unknown function; transcript accumulates in response to any combination of stress conditions
YDL170W	UGA3	4	156318	157904	W		5.86433		Abundance_Low		Abundance_Low	Transcriptional activator for GABA-dependent induction of GABA genes; binds to DNA elements found in the promoters of target genes and increases their expression in the presence of GABA (gamma-aminobutyrate); zinc finger transcription factor of the Zn(2)-Cys(6) binuclear cluster domain type; localized to the nucleus; examples of GABA genes include UGA1, UGA2, and UGA4
YDL171C	GLT1	4	149203	155640	C	glutamate synthase (NADH)	4.46299	642		1140.5		NAD(+)-dependent glutamate synthase (GOGAT); synthesizes glutamate from glutamine and alpha-ketoglutarate; with Gln1p, forms the secondary pathway for glutamate biosynthesis from ammonia; expression regulated by nitrogen source; assembles into filaments as cells approach stationary phase and under cytosolic acidification and starvation conditions
YDL172C	YDL172C	4	148607	149086	C		1.38351					Dubious open reading frame; unlikely to encode a functional protein, based on available experimental and comparative sequence data
YDL173W	PAR32	4	148191	149078	W		7.74613	219.5		262.5		Protein of unknown function; hyperphosphorylated upon rapamycin treatment in a Tap42p-dependent manner; green fluorescent protein (GFP)-fusion protein localizes to the cytoplasm; PAR32 is not an essential gene
YDL174C	DLD1	4	145826	147589	C	D-lactate dehydrogenase	7.43528		Failed_QC/Abundance_Low		Abundance_Low	Major mitochondrial D-lactate dehydrogenase; oxidizes D-lactate to pyruvate, transcription is heme-dependent, repressed by glucose, and derepressed in ethanol or lactate; located in the mitochondrial inner membrane
YDL175C	AIR2	4	144484	145518	C	TRAMP complex RNA-binding subunit	4.8009		Abundance_Low		Abundance_Low	RNA-binding subunit of the TRAMP nuclear RNA surveillance complex; involved in nuclear RNA processing and degradation; involved in TRAMP complex assembly as a bridge between Mtr4p and Trf4p; stimulates the poly(A) polymerase activity of Pap2p in vitro; has 5 zinc knuckle motifs; AIR2 has a paralog, AIR1, that arose from the whole genome duplication; Air2p and Air1p have nonredundant roles in regu…
YDL176W	YDL176W	4	142097	144223	W		4.54565		Failed_QC/Abundance_Low		Failed_QC/Abundance_Low	Protein of unknown function; predicted by computational methods to be involved in fructose-1,6-bisphosphatase (Fbp1p) degradation; interacts with components of the GID complex; YDL176W is not an essential gene
YDL177C	YDL177C	4	141209	141721	C		5.46129					Putative protein of unknown function; similar to the mouse IMPACT gene; YDL177C is not an essential gene
YDL178W	DLD2	4	139522	141114	W	D-lactate dehydrogenase|AIP2	6.73496	237		352.5		D-2-hydroxyglutarate dehydrogenase, and minor D-lactate dehydrogenase; mitochondrial matrix protein that oxidizes D-2-hydroxyglutarate (D-2HG), an oncometabolite, to alpha-ketoglutarate with a minor role in lactate catabolism; located in the mitochondrial matrix
YDL179W	PCL9	4	138291	139205	W		6.48733					Cyclin; forms a functional kinase complex with Pho85p cyclin-dependent kinase (Cdk), expressed in late M/early G1 phase, activated by Swi5p; PCL9 has a paralog, PCL2, that arose from the whole genome duplication
YDL180W	YDL180W	4	135896	137539	W		5.3622		Abundance_Low		Abundance_Low	Putative protein of unknown function; green fluorescent protein (GFP)-fusion protein localizes to the vacuole
YDL181W	INH1	4	135179	135436	W	ATPase inhibitor	8.01387	124		132.1		Protein that inhibits ATP hydrolysis by the F1F0-ATP synthase; inhibitory function is enhanced by stabilizing proteins Stf1p and Stf2p; has a calmodulin-binding motif and binds calmodulin in vitro; INH1 has a paralog, STF1, that arose from the whole genome duplication
YDL182W	LYS20	4	133437	134723	W	homocitrate synthase LYS20	9.05881	780		6433		Homocitrate synthase isozyme and functions in DNA repair; catalyzes the condensation of acetyl-CoA and alpha-ketoglutarate to form homocitrate, which is the first step in the lysine biosynthesis pathway; LYS20 has a paralog, LYS21, that arose from the whole genome duplication
YDL183C	YDL183C	4	130871	131833	C	MKR1	4.31099					Protein that may form an active mitochondrial KHE system; mitochondrial inner-membrane protein; non-essential gene; KHE system stands for K+/H+ exchanger system
YDL184C	RPL41A	4	130407	130484	C	eL41|ribosomal 60S subunit protein L41A|L41e|YL41|L47A|L41A|RPL47A		10529.5		6336.3		Ribosomal 60S subunit protein L41A; comprises only 25 amino acids; rpl41a rpl41b double null mutant is viable; homologous to mammalian ribosomal protein L41, no bacterial homolog; RPL41A has a paralog, RPL41B, that arose from the whole genome duplication
YDL185C-A	YDL185C-A	4	126608	126835	C							Dubious open reading frame; unlikely to encode a functional protein, based on available experimental and comparative sequence data; partially overlaps the verified gene YDL185W; identified by homology with hemiascomycetous yeast species
YDL185W	VMA1	4	126787	130002	W	H(+)-transporting V1 sector ATPase subunit A|TFP1|CLS8	7.95616	4973		2731.1		Subunit A of the V1 peripheral membrane domain of V-ATPase; protein precursor undergoes self-catalyzed splicing to yield the extein Tfp1p and the intein Vde (PI-SceI), which is a site-specific endonuclease; the V1 peripheral membrane domain of the vacuolar H+-ATPase (V-ATPase) has eight subunits; involved in methionine restriction extension of chronological lifespan in an autophagy-dependent mann…
YDL186W	YDL186W	4	125616	126449	W							Putative protein of unknown function; YDL186W is not an essential gene
YDL187C	YDL187C	4	125509	125838	C		0.842737					Dubious open reading frame; unlikely to encode a functional protein, based on available experimental and comparative sequence data
YDL188C	PPH22	4	123865	124998	C	phosphoprotein phosphatase 2A catalytic subunit PPH22|PPH2	6.14987		Abundance_Low		Abundance_Low	Catalytic subunit of protein phosphatase 2A (PP2A); functionally redundant with Pph21p; methylated at C terminus; forms alternate complexes with several regulatory subunits; involved in signal transduction and regulation of mitosis; protein abundance increases in response to DNA replication stress; dephosphorylates Tel1p/Mec1p-phosphorylated Cdc13p to promote telomerase release from telomeres at …
YDL189W	RBS1	4	122216	123589	W		6.4196	128		104.5		Protein involved in assembly of the RNA polymerase III (Pol III) complex; high copy suppressor of Pol III assembly mutation and psk1 psk2 mutations that confer temperature-sensitivity for galactose utilization; physically interacts with Pol III; proposed to bind single-stranded nucleic acids via its R3H domain
YDL190C	UFD2	4	118707	121592	C	ubiquitin-ubiquitin ligase UFD2	5.31771	193		174.5		Ubiquitin chain assembly factor (E4); cooperates with a ubiquitin-activating enzyme (E1), a ubiquitin-conjugating enzyme (E2), and a ubiquitin protein ligase (E3) to conjugate ubiquitin to substrates; also functions as an E3
YDL191W	RPL35A	4	117664	118517	W	uL29|ribosomal 60S subunit protein L35A|L35A|L29|SOS1	11.6696	4919		3582		Ribosomal 60S subunit protein L35A; homologous to mammalian ribosomal protein L35 and bacterial L29; RPL35A has a paralog, RPL35B, that arose from the whole genome duplication
YDL192W	ARF1	4	116321	116866	W	Arf family GTPase ARF1	10.0299	4335.5		2432		ADP-ribosylation factor; GTPase of the Ras superfamily involved in regulation of coated vesicle formation in intracellular trafficking within the Golgi; ARF1 has a paralog, ARF2, that arose from the whole genome duplication; arf1 arf2 double null mutation is complemented by human ARF1, ARF4, ARF5, or ARF6
YDL193W	NUS1	4	114672	115799	W	ditrans,polycis-polyprenyl diphosphate synthase	5.50627	266.5		216		Forms dehydrodolichyl diphosphate syntase complex with RER2 or SRT1; tet-repressible mutant shows accumulation of hypoglycosylated forms of CPY, suggesting that Nus1p may be involved in protein trafficking; mutations in human homolog NUS1 have been implicated in congenital scoliosis, neurological impairment, refractory epilepsy, hearing deficit, and visual impairment; human cis-prenyltransferase …
YDL194W	SNF3	4	111580	114234	W	glucose sensor	3.31764					Plasma membrane low glucose sensor, regulates glucose transport; high affinity sensor that contains 12 predicted transmembrane segments and a long C-terminal tail required for induction of hexose transporters; also senses fructose and mannose; SNF3 has a paralog, RGT2, that arose from the whole genome duplication
YDL195W	SEC31	4	107208	111029	W	WEB1	6.10702	1375.5		1173		Component of the Sec13p-Sec31p complex of the COPII vesicle coat; COPII coat is required for vesicle formation in ER to Golgi transport; mutant has increased aneuploidy tolerance
YDL196W	YDL196W	4	106741	107070	W							Dubious open reading frame; unlikely to encode a functional protein, based on available experimental and comparative sequence data; open reading frame is located in promoter region of essential gene SEC31
YDL197C	ASF2	4	104917	106494	C		4.85548		Abundance_Low		Abundance_Low	Anti-silencing protein; causes derepression of silent loci when overexpressed
YDL198C	GGC1	4	103649	104551	C	SHM1|YHM1	7.55077					Mitochondrial GTP/GDP transporter; essential for mitochondrial genome maintenance; has a role in mitochondrial iron transport; member of the mitochondrial carrier family
YDL199C	YDL199C	4	101290	103353	C		2.92185					Putative transporter; member of the sugar porter family
YDL200C	MGT1	4	100501	101067	C	methylated-DNA--protein-cysteine methyltransferase|MGMT	6.03897					DNA repair methyltransferase (6-O-methylguanine-DNA methylase); involved in protection against DNA alkylation damage
YDL201W	TRM8	4	99561	100421	W	tRNA (guanine46-N7)-methyltransferase	6.59809	133.5		78.5		Noncatalytic subunit of a tRNA methyltransferase complex; Trm8p and Trm82p comprise an enzyme that catalyzes a methyl-transfer from S-adenosyl-l-methionine to the N(7) atom of guanine at position 46 in tRNA; Trm8 lacks catalytic activity if not bound to Trm82p
YDL202W	MRPL11	4	98475	99224	W	mitochondrial 54S ribosomal protein YmL11|YmL11	6.1448	227.5		237		Mitochondrial ribosomal protein of the large subunit; localizes to vacuole in response to H2O2
YDL203C	ACK1	4	96082	97953	C		5.27726	52.5		50		Protein that functions in the cell wall integrity pathway; functions upstream of Pkc1p; GFP-fusion protein expression is induced in response to the DNA-damaging agent MMS; non-tagged Ack1p is detected in purified mitochondria
YDL204W	RTN2	4	94605	95786	W		4.97363		Abundance_Low	64.5		Reticulon protein; involved in nuclear pore assembly and maintenance of tubular ER morphology; promotes membrane curvature; regulates the ER asymmetry-induced inheritance block during ER stress; role in ER-derived peroxisomal biogenesis; interacts with Sec6p, Yip3p, and Sbh1p; less abundant than RTN1; member of RTNLA (reticulon-like A) subfamily; protein increases in abundance and relocalizes to …
YDL205C	HEM3	4	92762	93745	C	hydroxymethylbilane synthase|OLE2	6.05331	299.5		266		Porphobilinogen deaminase; catalyzes the conversion of 4-porphobilinogen to hydroxymethylbilane, the third step in heme biosynthesis; localizes to the cytoplasm and nucleus; expression is regulated by Hap2p-Hap3p, but not by levels of heme; human homolog HMBS can complement yeast mutant and allow growth of haploid null after sporulation of a heterozygous diploid
YDL206W	YDL206W	4	90176	92464	W		3.94742					Putative protein of unknown function; YDL206W is not an essential protein
YDL207W	GLE1	4	88248	89864	W	nucleoporin GLE1|NLE2|BRR3|RSS1	5.89027	72		92.5		Cytoplasmic nucleoporin required for polyadenylated mRNA export; contains a nuclear export signal; when bound to inositol hexakisphosphate (IP6), functions as an activator for the Dbp5p ATPase activity at the nuclear pore complex during mRNA export; mediates translation initiation; required for efficient translation termination
YDL208W	NHP2	4	87512	87982	W	snoRNA-binding protein NHP2	8.98152	1210.5		783.3		Protein related to mammalian high mobility group (HMG) proteins; nuclear protein; essential for function of H/ACA-type snoRNPs, which are involved in 18S rRNA processing
YDL209C	CWC2	4	86207	87226	C	NTC40	5.27325		Abundance_Low		Abundance_Low	Member of the NineTeen Complex (NTC); this complex contains Prp19p and stabilizes U6 snRNA in catalytic forms of the spliceosome containing U2, U5, and U6 snRNAs; binds directly to U6 snRNA; similar to S. pombe Cwf2
YDL210W	UGA4	4	84270	85985	W		2.14416					GABA (gamma-aminobutyrate) permease; serves as a GABA transport protein involved in the utilization of GABA as a nitrogen source; catalyzes the transport of putrescine and delta-aminolevulinic acid (ALA); localized to the vacuolar membrane
YDL211C	YDL211C	4	79294	80412	C		4.23954		Abundance_Low		Abundance_Low	Protein of unknown function; green fluorescent protein (GFP)-fusion protein localizes to the vacuole; YDL211C has a paralog, TDA7, that arose from the whole genome duplication
YDL212W	SHR3	4	78426	79058	W	APF1	8.2753	545		385.5		Endoplasmic reticulum packaging chaperone; required for incorporation of amino acid permeases into COPII coated vesicles for transport to the cell surface
YDL213C	NOP6	4	77289	77966	C		7.1499	574		416.5		rRNA-binding protein required for 40S ribosomal subunit biogenesis; contains an RNA recognition motif (RRM); hydrophilin essential to overcome the stress of the desiccation-rehydration process; NOP6 may be a fungal-specific gene as no homologs have been yet identified in higher eukaryotes
YDL214C	PRR2	4	74446	76545	C	serine/threonine protein kinase PRR2	2.40147					Serine/threonine protein kinase; inhibits pheromone induced signalling downstream of MAPK, possibly at the level of the Ste12p transcription factor; mutant has increased aneuploidy tolerance; PRR2 has a paralog, NPR1, that arose from the whole genome duplication
YDL215C	GDH2	4	70640	73918	C	glutamate dehydrogenase (NAD(+))|GDHB|GDH-B	4.92651	99.5		200		NAD(+)-dependent glutamate dehydrogenase; degrades glutamate to ammonia and alpha-ketoglutarate; expression sensitive to nitrogen catabolite repression and intracellular ammonia levels; genetically interacts with GDH3 by suppressing stress-induced apoptosis
YDL216C	RRI1	4	68997	70319	C	COP9 signalosome catalytic subunit RRI1|JAB1|CSN5	3.75159		Abundance_Low		Abundance_Low	Catalytic subunit of the COP9 signalosome (CSN) complex; acts as an isopeptidase in cleaving the ubiquitin-like protein Nedd8 from SCF ubiquitin ligases; metalloendopeptidase involved in the adaptation to pheromone signaling; involved in modulation of genes controlling amino acid and lipid metabolism, and ergosterol biosynthesis
YDL217C	TIM22	4	67983	68606	C	translocation channel protein TIM22	5.7738					Essential core component of the mitochondrial TIM22 complex; involved in insertion of polytopic proteins into the inner membrane; forms the channel through which proteins are imported
YDL218W	YDL218W	4	66493	67446	W		1.67352					Putative protein of unknown function; YDL218W transcription is regulated by Azf1p and induced by starvation and aerobic conditions; expression also induced in cells treated with the mycotoxin patulin
YDL219W	DTD1	4	65242	65765	W	D-tyrosyl-tRNA(Tyr) deacylase	6.74497		Abundance_Low		Abundance_Low	D-Tyr-tRNA(Tyr) deacylase; functions in protein translation, may affect nonsense suppression via alteration of the protein synthesis machinery; ubiquitous among eukaryotes
YDL220C	CDC13	4	62244	65018	C	telomere-binding protein CDC13|EST4	3.7309		Abundance_Low		Abundance_Low	Single stranded DNA-binding protein found at TG1-3 telomere G-tails; key roles in regulation of telomerase, telomere end protection, conventional telomere replication; regulates telomere replication through recruitment of specific sub-complexes, essential function is telomere capping; forms homodimer via N-terminus; disruption of dimerization leads to short telomeres; autophagy and proteasome are…
YDL221W	YDL221W	4	62011	62562	W							Dubious open reading frame; unlikely to encode a functional protein, based on available experimental and comparative sequence data; partially overlaps the 3' end of essential gene CDC13
YDL222C	FMP45	4	60872	61801	C		4.55677		Abundance_Low		Abundance_Low	Integral membrane protein localized to mitochondria; required for sporulation and maintaining sphingolipid content; similar to SUR7; FMP45 has a paralog, YNL194C, that arose from the whole genome duplication
YDL223C	HBT1	4	57265	60405	C		3.77242		Abundance_Low		Abundance_Low	Shmoo tip protein, substrate of Hub1p ubiquitin-like protein; mutants are defective for mating projection formation, thereby implicating Hbt1p in polarized cell morphogenesis; HBT1 has a paralog, YNL195C, that arose from the whole genome duplication
YDL224C	WHI4	4	54397	56346	C		6.0225	125		138		Putative RNA binding protein; regulates the cell size requirement for passage through Start and commitment to cell division; WHI4 has a paralog, WHI3, that arose from the whole genome duplication
YDL225W	SHS1	4	52445	54100	W	septin SHS1|SEP7	6.42394	330		255.5		Component of the septin ring that is required for cytokinesis; present at the ends of rod-like septin hetero-oligomers; C-terminal extension is important for recruitment of Bni5p to the mother-bud neck, which in turn is required for Myo1p recruitment and cytokinesis; undergoes sumoylation and phosphorylation during mitosis; protein abundance increases in response to DNA replication stress
YDL226C	GCS1	4	51115	52173	C		7.33937	469		410.5		ADP-ribosylation factor GTPase activating protein (ARF GAP); involved in ER-Golgi transport; required for prospore membrane formation; regulates phospholipase Spo14p; shares functional similarity with Glo3p; GCS1 has a paralog, SPS18, that arose from the whole genome duplication
YDL227C	HO	4	46271	48031	C		3.7362		Abundance_Low		Abundance_Low	Site-specific endonuclease; required for gene conversion at the MAT locus (homothallic switching) through the generation of a ds DNA break; expression restricted to mother cells in late G1 as controlled by Swi4p-Swi6p, Swi5p, and Ash1p
YDL228C	YDL228C	4	45277	45918	C		1.89056					Dubious open reading frame; unlikely to encode a functional protein, based on available experimental and comparative sequence data; almost completely overlaps the verified gene SSB1
YDL229W	SSB1	4	44065	45906	W	Hsp70 family ATPase SSB1|YG101	10.1835	1218		968.5		Cytoplasmic ATPase that is a ribosome-associated molecular chaperone; functions with J-protein partner Zuo1p; may be involved in folding of newly-made polypeptide chains; member of the HSP70 family; interacts with phosphatase subunit Reg1p; SSB1 has a paralog, SSB2, that arose from the whole genome duplication
YDL230W	PTP1	4	42700	43707	W	tyrosine protein phosphatase PTP1	4.87635		Abundance_Low		Abundance_Low	Phosphotyrosine-specific protein phosphatase; dephosphorylates a broad range of substrates in vivo, including Fpr3p; localized to the cytoplasm and the mitochondria; proposed to be a negative regulator of filamentation
YDL231C	BRE4	4	38867	42244	C		5.78812					Zinc finger protein containing five transmembrane domains; null mutant exhibits strongly fragmented vacuoles and sensitivity to brefeldin A, a drug which is known to affect intracellular transport
YDL232W	OST4	4	38487	38597	W	olichyl-diphosphooligosaccharide--protein glycotransferase OST4	6.35729	1881		1226.5		Subunit of the oligosaccharyltransferase complex of the ER lumen; complex catalyzes protein asparagine-linked glycosylation; type I membrane protein required for incorporation of Ost3p or Ost6p into the OST complex
YDL233W	MFG1	4	36797	38173	W		4.536		Abundance_Low		Abundance_Low	Regulator of filamentous growth; interacts with FLO11 promoter and regulates FLO11 expression; binds to transcription factors Flo8p and Mss11p; green fluorescent protein (GFP)-fusion protein localizes to the nucleus; YDL233W is not an essential gene
YDL234C	GYP7	4	34237	36477	C		5.29252		Abundance_Low	59.5		GTPase-activating protein for yeast Rab family members; members include Ypt7p (most effective), Ypt1p, Ypt31p, and Ypt32p (in vitro); involved in vesicle mediated protein trafficking; contains a PH-like domain
YDL235C	YPD1	4	33415	33918	C		7.41403	317		204.6		Osmotic stress-responsive phosphorelay intermediate sensor protein; phosphorylated by the plasma membrane sensor Sln1p in response to osmotic stress and then in turn phosphorylates the response regulators Ssk1p in the cytosol and Skn7p in the nucleus
YDL236W	PHO13	4	32296	33234	W	4-nitrophenylphosphatase	7.74061	321		411.5		Conserved phosphatase acting as a metabolite repair enzyme; shows specific dephosphorylating activity on two side-products of central carbohydrate metabolism, 2-phosphoglycolate and 4-phosphoerythronate; alkaline phosphatase specific for p-nitrophenyl phosphate; also has protein phosphatase activity; human ortholog PGP shows similar substrate specificity, deletion causes similar metabolite accumu…
YDL237W	AIM6	4	30657	31829	W	LRC1	6.65061					Protein of unknown function; required for respiratory growth; YDL237W is not an essential gene
YDL238C	GUD1	4	28985	30454	C	guanine deaminase	4.00478		Abundance_Low		Abundance_Low	Guanine deaminase; a catabolic enzyme of the guanine salvage pathway producing xanthine and ammonia from guanine; activity is low in exponentially-growing cultures but expression is increased in post-diauxic and stationary-phase cultures
YDL239C	ADY3	4	26403	28775	C		3.63784					Protein required for spore wall formation; subunit of the leading edge protein (LEP) complex (Ssp1-Ady3-Don1-Irc10) that forms a ring-like structure at the leading edge of the prospore membrane during meiosis II; mediates assembly of the LEP complex, formation of the ring-like structure via interaction with spindle pole body components and prospore membrane maturation; potentially phosphorylated …
YDL240C-A	YDL240C-A	4	22471	22608	C							Dubious open reading frame; unlikely to encode a functional protein, based on available experimental and comparative sequence data; identified by sequence comparison with hemiascomycetous yeast species
YDL240W	LRG1	4	22823	25876	W		4.72409		Abundance_Low		Abundance_Low	GTPase-activating protein (GAP); contains Rho1p-specific GAP activity, interacting with activated forms of Rho1p; functions along with Sac7p as a negative regulator of the Pkc1p-mediated cell wall integrity signaling pathway; negative regulator of cell wall 1,3-beta-glucan biosynthesis; required for efficient cell fusion; contains a RhoGAP domain and three Lin-11-Isl1-Mec-3 (LIM) domains
YDL241W	YDL241W	4	20635	21006	W		1.49263					Putative protein of unknown function; SWAT-GFP and mCherry fusion proteins localize to the endoplasmic reticulum; YDL241W is not an essential gene
YDL242W	YDL242W	4	18959	19312	W							Putative protein of unknown function; conserved across S. cerevisiae strains
YDL243C	AAD4	4	17577	18566	C	putative aryl-alcohol dehydrogenase	4.18276					Putative aryl-alcohol dehydrogenase; involved in oxidative stress response; similar to P. chrysosporium aryl-alcohol dehydrogenase; expression induced in cells treated with the mycotoxin patulin; members of the AAD gene family comprise three pairs (AAD3 + AAD15, AAD6/AAD16 + AAD4, AAD10 + AAD14) whose two genes are more related to one another than to other members of the family
YDL244W	THI13	4	16204	17226	W	4-amino-5-hydroxymethyl-2-methylpyrimidine phosphate synthase						Protein involved in synthesis of the thiamine precursor HMP; member of a subtelomeric gene family including THI5, THI11, THI12, and THI13; hydroxymethylpyrimidine is also known as HMP
YDL245C	HXT15	4	11657	13360	C	HLT2|hexose transporter HXT15						Putative transmembrane polyol transporter; supports growth on and uptake of mannitol, sorbitol and xylitol with moderate affinity when overexpressed in a strain deleted for hexose family members; minor hexose transport activity when overexpressed in a similar strain; similarity to hexose transporters; expression is induced by low levels of glucose and repressed by high levels of glucose
YDL246C	SOR2	4	8683	9756	C	L-iditol 2-dehydrogenase SOR2	1.86315					Sorbitol dehydrogenase; protein sequence is 99% identical to the Sor1p sorbitol dehydrogenase
YDL247W	MPH2	4	5985	7814	W	alpha-glucoside permease						Alpha-glucoside permease; transports maltose, maltotriose, alpha-methylglucoside, and turanose; almost identical to Mph3p; encoded in a subtelomeric position in a region likely to have undergone duplication
YDL247W-A	YDL247W-A	4	3762	3836	W							Dubious open reading frame; unlikely to encode a functional protein, based on available experimental and comparative sequence data; identified by sequence comparison with hemiascomycetous yeast species
YDL248W	COS7	4	1802	2953	W		4.03584		Abundance_Low		Abundance_Low	Endosomal protein involved in turnover of plasma membrane proteins; member of the DUP380 subfamily of conserved, often subtelomeric COS genes; required for the multivesicular vesicle body sorting pathway that internalizes plasma membrane proteins for degradation; Cos proteins provide ubiquitin in trans for nonubiquitinated cargo proteins; the authentic, non-tagged protein is detected in highly pu…
YDR001C	NTH1	4	450220	452475	C	alpha,alpha-trehalase NTH1	6.67468	195		269		Neutral trehalase, degrades trehalose; required for thermotolerance and may mediate resistance to other cellular stresses; phosphorylated and activated by Cdc28p at the G1/S phase transition to coordinately regulate carbohydrate metabolism and the cell cycle; inhibited by Dcs1p; NTH1 has a paralog, NTH2, that arose from the whole genome duplication
YDR002W	YRB1	4	453045	453650	W	Ran GTPase-binding protein YRB1|STP52|SFO1|HTN1|CST20	9.30715					Ran GTPase binding protein; involved in nuclear protein import and RNA export, ubiquitin-mediated protein degradation during the cell cycle; shuttles between the nucleus and cytoplasm; is essential; homolog of human RanBP1
YDR003W	RCR2	4	454122	454754	W	SSH5	5.94239	165.5		115.5		Vacuolar protein; presumably functions within the endosomal-vacuolar trafficking pathway, affecting events that determine whether plasma membrane proteins are degraded or routed to the plasma membrane; RCR2 has a paralog, RCR1, that arose from the whole genome duplication
YDR003W-A	YDR003W-A	4	454782	454904	W							Putative protein of unknown function; identified by expression profiling and mass spectrometry
YDR004W	RAD57	4	455201	456583	W	putative DNA-dependent ATPase RAD57	5.26865		Abundance_Low		Abundance_Low	Protein that stimulates strand exchange; stimulates strand exchange by stabilizing the binding of Rad51p to single-stranded DNA; involved in the recombinational repair of double-strand breaks in DNA during vegetative growth and meiosis; forms heterodimer with Rad55p
YDR005C	MAF1	4	456836	458103	C	RNA polymerase III-inhibiting protein MAF1	6.01451		Abundance_Low		Abundance_Low	Highly conserved negative regulator of RNA polymerase III; involved in tRNA processing and stability; inhibits tRNA degradation via rapid tRNA decay (RTD) pathway; binds N-terminal domain of Rpc160p subunit of Pol III to prevent closed-complex formation; regulated by phosphorylation mediated by TORC1, protein kinase A, Sch9p, casein kinase 2; localizes to cytoplasm during vegetative growth and tr…
YDR006C	SOK1	4	458542	461247	C		5.5455		Abundance_Low		Abundance_Low	Protein of unknown function; overexpression suppresses the growth defect of mutants lacking protein kinase A activity; involved in cAMP-mediated signaling; localized to the nucleus; similar to the mouse testis-specific protein PBS13
YDR007W	TRP1	4	461842	462516	W	phosphoribosylanthranilate isomerase TRP1	6.28281	60.5		106.5		Phosphoribosylanthranilate isomerase; catalyzes the third step in tryptophan biosynthesis; in 2004, the sequence of TRP1 from strain S228C was updated by changing the previously annotated internal STOP (TAA) to serine (TCA); enhances vegetative growth at low and high temperatures when used as an auxotrophic marker in strains such as W303
YDR008C	YDR008C	4	462252	462602	C							Dubious open reading frame; unlikely to encode a functional protein, based on available experimental and comparative sequence data; partially overlaps TRP1/YDR007W on opposite strand
YDR009W	GAL3	4	463434	464996	W	transcriptional regulator GAL3	2.63804		Abundance_Low		Abundance_Low	Transcriptional regulator; involved in activation of the GAL genes in response to galactose; forms a complex with Gal80p to relieve Gal80p inhibition of Gal4p; binds galactose and ATP but does not have galactokinase activity; GAL3 has a paralog, GAL1, that arose from the whole genome duplication
YDR010C	YDR010C	4	465051	465383	C							Dubious open reading frame; unlikely to encode a functional protein, based on available experimental and comparative sequence data
YDR011W	SNQ2	4	465919	470424	W	ATP-binding cassette transporter SNQ2	4.72547	533		341.8		Plasma membrane ATP-binding cassette (ABC) transporter; multidrug transporter involved in multidrug resistance and resistance to singlet oxygen species
YDR012W	RPL4B	4	471853	472941	W	uL4|ribosomal 60S subunit protein L4B|L4|rp2|YL2|L4B|L2B	9.85305	3191.5		3327.5		Ribosomal 60S subunit protein L4B; homologous to mammalian ribosomal protein L4 and bacterial L4; RPL4B has a paralog, RPL4A, that arose from the whole genome duplication
YDR013W	PSF1	4	473157	473783	W	DNA replication protein PSF1|CDC101	5.24763					Subunit of the GINS complex (Sld5p, Psf1p, Psf2p, Psf3p); complex is localized to DNA replication origins and implicated in assembly of the DNA replication machinery
YDR014W	RAD61	4	474046	475989	W	WPL1	3.71235		Abundance_Low		Abundance_Low	Subunit of a complex that inhibits sister chromatid cohesion; also negatively regulates chromosome condensation; inhibited by Eco1p-acetylated cohesin subunits Smc3p and Mcd1p; binds Smc3p ATPase head of cohesin; related to the human Wapl protein that controls the association of cohesin with chromatin
YDR014W-A	HED1	4	477797	478285	W							Meiosis-specific protein; down-regulates Rad51p-mediated mitotic recombination when the meiotic recombination machinery is impaired; promotes synapsis and required for the normal morphogenesis of synaptonemal complex; prevents the recruitment of Rad54p to site-specific DNA double-strand breaks in vivo; early meiotic gene, transcribed specifically during meiotic prophase
YDR015C	YDR015C	4	477960	478199	C							Dubious open reading frame; unlikely to encode a functional protein, based on available experimental and comparative sequence data; overlaps the verified gene HED1/YDR014W-A
YDR016C	DAD1	4	478474	478758	C		6.39082	91.5		136.9		Essential subunit of the Dam1 complex (aka DASH complex); complex couples kinetochores to the force produced by MT depolymerization thereby aiding in chromosome segregation; is transferred to the kinetochore prior to mitosis
YDR017C	KCS1	4	479115	482267	C	inositol polyphosphate kinase KCS1	5.29555	112		111		Inositol hexakisphosphate and inositol heptakisphosphate kinase; generation of high energy inositol pyrophosphates by Kcs1p is required for many processes such as vacuolar biogenesis, stress response, RNA polymerase I-mediated rRNA transcription and telomere maintenance; inositol hexakisphosphate is also known as IP6; inositol heptakisphosphate is also known as IP7
YDR018C	YDR018C	4	482670	483860	C	putative acyltransferase	2.40432					Probable membrane protein with three predicted transmembrane domains; similar to C. elegans F55A11.5 and maize 1-acyl-glycerol-3-phosphate acyltransferase; YDR018C has a paralog, CST26, that arose from the whole genome duplication
YDR019C	GCV1	4	484163	485365	C	glycine decarboxylase subunit T|GSD1	7.74239	595.5		1916.5		T subunit of the mitochondrial glycine decarboxylase complex; glycine decarboxylase is required for the catabolism of glycine to 5,10-methylene-THF; expression is regulated by levels of levels of 5,10-methylene-THF in the cytoplasm
YDR020C	DAS2	4	485746	486444	C	putative uridine kinase DAS2|RRT3	5.34925	104.5			Abundance_Low	Putative protein of unknown function; non-essential gene identified in a screen for mutants with increased levels of rDNA transcription; weak similarity with uridine kinases and with phosphoribokinases
YDR021W	FAL1	4	486804	488003	W	ATP-dependent RNA helicase FAL1	5.22982	61.5			Abundance_Low	Nucleolar protein required for maturation of 18S rRNA; member of the eIF4A subfamily of DEAD-box ATP-dependent RNA helicases; 18S rRNA biogenesis defect of the null mutant is functionally complemented by human EIF4A3
YDR022C	ATG31	4	488072	488662	C	CIS1	5.36814		Abundance_Low		Failed_QC/Abundance_Low	Autophagy-specific protein required for autophagosome formation; forms a complex with Atg17p and Atg29p that localizes other proteins to the pre-autophagosomal structure; constitutively phosphorylated, and phosphorylation of residue S174 is required for function; high-copy suppressor of CIK1 deletion
YDR023W	SES1	4	489508	490896	W	serine--tRNA ligase SES1|SerRS	8.82316	2307		1773		Cytosolic seryl-tRNA synthetase; class II aminoacyl-tRNA synthetase that aminoacylates tRNA(Ser), displays tRNA-dependent amino acid recognition which enhances discrimination of the serine substrate, interacts with peroxin Pex21p
YDR024W	FYV1	4	491017	491502	W				Abundance_Low		Abundance_Low	Dubious open reading frame; unlikely to encode a functional protein, based on available experimental and comparative sequence data; not conserved in closely related Saccharomyces species; mutation decreases survival upon exposure to K1 killer toxin
YDR025W	RPS11A	4	491515	492324	W	uS17|ribosomal 40S subunit protein S11A|S17|rp41A|YS12|S18A|S11A	10.7754	49.5			Abundance_Low	Protein component of the small (40S) ribosomal subunit; homologous to mammalian ribosomal protein S11 and bacterial S17; N-terminally propionylated in vivo; RPS11A has a paralog, RPS11B, that arose from the whole genome duplication
YDR026C	NSI1	4	492556	494268	C	YTT1	5.67162		Abundance_Low		Abundance_Low	RNA polymerase I termination factor; binds to rDNA terminator element, required for efficient Pol I termination; required for rDNA silencing at NTS1; facilities association of Sir2p with NTS1, contributes to rDNA stability and cell longevity; interacts physically with Fob1p and RENT subunits, Sir2p and Net1p; may interact with ribosomes, based on co-purification experiments; Myb-like DNA-binding …
YDR027C	VPS54	4	494649	497318	C	TCS3|CGP1|LUV1	5.09653	74.5		61.5		Component of the GARP (Golgi-associated retrograde protein) complex; GARP is required for the recycling of proteins from endosomes to the late Golgi, and for mitosis after DNA damage induced checkpoint arrest; potentially phosphorylated by Cdc28p; members of the GARP complex are Vps51p-Vps52p-Vps53p-Vps54p
YDR028C	REG1	4	497835	500879	C	protein phosphatase regulator REG1|SRN1|SPP43|PZF240|HEX2	6.21199	161		189.5		Regulatory subunit of type 1 protein phosphatase Glc7p; involved in negative regulation of glucose-repressible genes; involved in regulation of the nucleocytoplasmic shuttling of Hxk2p; REG1 has a paralog, REG2, that arose from the whole genome duplication
YDR029W	YDR029W	4	501100	501414	W							Putative protein of unknown function; conserved among S. cerevisiae strains; YDR029W is not an essential gene
YDR030C	RAD28	4	501753	503273	C		4.62629					Protein involved in DNA repair; related to the human CSA protein that is involved in transcription-coupled repair nucleotide excision repair
YDR031W	MIX14	4	503498	503863	W	MIC14	5.69236		Abundance_Low		Abundance_Low	Mitochondrial intermembrane space protein of unknown function; required for normal oxygen consumption; contains twin cysteine-x9-cysteine motifs; protein abundance increases in response to DNA replication stress
YDR032C	PST2	4	504099	504695	C	flavodoxin-like fold family protein	9.38163	289.5		231.4		Protein with similarity to a family of flavodoxin-like proteins; induced by oxidative stress in a Yap1p dependent manner; the authentic, non-tagged protein is detected in highly purified mitochondria in high-throughput studies; protein abundance increases in response to DNA replication stress; PST2 has a paralog, RFS1, that arose from the whole genome duplication
YDR033W	MRH1	4	508147	509109	W		9.4976	3378.5		2783		Protein that localizes primarily to the plasma membrane; also found at the nuclear envelope; long-lived protein that is asymmetrically retained in the plasma membrane of mother cells; the authentic, non-tagged protein is detected in mitochondria in a phosphorylated state; null mutation confers sensitivity to acetic acid
YDR034C	LYS14	4	509737	512109	C		6.42902		Abundance_Low		Failed_QC/Abundance_Low	Transcriptional activator involved in regulating lysine biosynthesis; involved in the regulation of genes of the lysine biosynthesis pathway; requires 2-aminoadipate semialdehyde as co-inducer
YDR034C-A	YDR034C-A	4	520516	520692	C							Putative protein of unknown function; contained within the solo Ty1 LTR element YDRWdelta7
YDR034W-B	YDR034W-B	4	521314	521469	W			116.5		123.4		Predicted tail-anchored plasma membrane protein; contains conserved CYSTM module; related proteins in other organisms may be involved in response to stress; N- and C-terminal fusion proteins localize to the cell periphery; YDR034W-B has a paralog, YBR056W-A, that arose from the whole genome duplication
YDR035W	ARO3	4	521816	522928	W	3-deoxy-7-phosphoheptulonate synthase ARO3	7.50923	548		1202		3-deoxy-D-arabino-heptulosonate-7-phosphate (DAHP) synthase; catalyzes the first step in aromatic amino acid biosynthesis and is feedback-inhibited by phenylalanine or high concentration of tyrosine or tryptophan
YDR036C	EHD3	4	523211	524713	C	MRP5	5.46418	222		171.5		3-hydroxyisobutyryl-CoA hydrolase; member of a family of enoyl-CoA hydratase/isomerases; non-tagged protein is detected in highly purified mitochondria in high-throughput studies; phosphorylated; mutation affects fluid-phase endocytosis
YDR037W	KRS1	4	525440	527215	W	lysine--tRNA ligase KRS1|GCD5	8.86206					Lysyl-tRNA synthetase
YDR038C	ENA5	4	527422	530697	C	putative Na(+)-exporting P-type ATPase ENA5	2.8442		Abundance_Low		Abundance_Low	Protein with similarity to P-type ATPase sodium pumps; member of the Na+ efflux ATPase family
YDR039C	ENA2	4	531307	534582	C	Na(+)-exporting P-type ATPase ENA2	2.73214	44.5			Abundance_Low	P-type ATPase sodium pump; involved in Na+ efflux to allow salt tolerance; likely not involved in Li+ efflux
YDR040C	ENA1	4	535192	538467	C	Na(+)/Li(+)-exporting P-type ATPase ENA1|PMR2|HOR6	3.56101	56.5		83.6		P-type ATPase sodium pump; involved in Na+ and Li+ efflux to allow salt tolerance
YDR041W	RSM10	4	539803	540414	W	mitochondrial 37S ribosomal protein RSM10	6.47157		Abundance_Low		Abundance_Low	Mitochondrial ribosomal protein of the small subunit; has similarity to E. coli S10 ribosomal protein; essential for viability, unlike most other mitoribosomal proteins
YDR042C	YDR042C	4	540601	541203	C		1.16354					Putative protein of unknown function; expression is increased in ssu72-ts69 mutant
YDR043C	NRG1	4	542674	543369	C	transcriptional regulator NRG1	6.40317		Abundance_Low		Abundance_Low	Transcriptional repressor; recruits the Cyc8p-Tup1p complex to promoters; mediates glucose repression and negatively regulates a variety of processes including filamentous growth and alkaline pH response; activated in stochastic pulses of nuclear localization in response to low glucose
YDR044W	HEM13	4	546642	547628	W	coproporphyrinogen oxidase	4.54323	304.5		127.5		Coproporphyrinogen III oxidase; oxygen-requiring enzyme that catalyzes sixth step in heme biosynthetic pathway; transcription is repressed by oxygen and heme (via Rox1p and Hap1p); human homolog CPOX can complement yeast mutant and allow growth of haploid null after sporulation of a heterozygous diploid
YDR045C	RPC11	4	547978	548310	C	DNA-directed RNA polymerase III core subunit RPC11|C11	6.4143					RNA polymerase III subunit C11; mediates pol III RNA cleavage activity and is important for termination of transcription; homologous to TFIIS
YDR046C	BAP3	4	548762	550576	C	amino acid transporter BAP3|PAP1		906.5		813.5		Amino acid permease; involved in uptake of cysteine, leucine, isoleucine and valine; BAP3 has a paralog, BAP2, that arose from the whole genome duplication
YDR047W	HEM12	4	551860	552948	W	uroporphyrinogen decarboxylase HEM12|HEM6	6.3583	160		131.5		Uroporphyrinogen decarboxylase; catalyzes the fifth step in the heme biosynthetic pathway; localizes to both the cytoplasm and nucleus; a hem12 mutant has phenotypes similar to patients with porphyria cutanea tarda
YDR048C	YDR048C	4	553084	553398	C							Dubious open reading frame; unlikely to encode a functional protein, based on available experimental and comparative sequence data; partially overlaps ORF VMS1/YDR049W
YDR049W	VMS1	4	553254	555152	W		5.21347	92		83.5		Component of a Cdc48p-complex involved in protein quality control; exhibits cytosolic and ER-membrane localization, with Cdc48p, during normal growth, and contributes to ER-associated degradation (ERAD) of specific substrates at a step after their ubiquitination; forms a mitochondrially-associated complex with Cdc48p and Npl4p under oxidative stress that is required for ubiquitin-mediated mitocho…
YDR050C	TPI1	4	555726	556472	C	triose-phosphate isomerase TPI1	12.0439	4768		4138.5		Triose phosphate isomerase, abundant glycolytic enzyme; mRNA half-life is regulated by iron availability; transcription is controlled by activators Reb1p, Gcr1p, and Rap1p through binding sites in the 5' non-coding region; inhibition of Tpi1p activity by PEP (phosphoenolpyruvate) stimulates redox metabolism in respiring cells; E104D mutation in human homolog TPI1 causes a rare autosomal disease; …
YDR051C	DET1	4	557056	558060	C	acid phosphatase DET1	6.24528	79.5		62		Acid phosphatase; involved in the non-vesicular transport of sterols in both directions between the endoplasmic reticulum and plasma membrane; deletion confers sensitivity to nickel
YDR052C	DBF4	4	558511	560625	C	protein serine/threonine kinase activating protein DBF4|DNA52|LSD7	5.8775		Abundance_Low		Abundance_Low	Regulatory subunit of Cdc7p-Dbf4p kinase complex; required for Cdc7p kinase activity and initiation of DNA replication; phosphorylates the Mcm2-7 family of proteins; cell cycle regulated; relative distribution to the nucleus increases upon DNA replication stress; co-expression of human CDC7 and DBF4 complements single cdc7 or dbf4 null mutations or the cdc7 dbf4 double null mutation
YDR053W	YDR053W	4	560249	560644	W							Putative protein of unknown function; open reading frame overlaps 5' end of essential DBF4 gene encoding the regulatory subunit of the Cdc7p-Dbf4p kinase complex
YDR054C	CDC34	4	561440	562327	C	SCF E2 ubiquitin-protein ligase catalytic subunit CDC34|UBC3|DNA6	6.84637	280		256.5		Ubiquitin-conjugating enzyme (E2); catalytic subunit of SCF ubiquitin-protein ligase complex (together with Skp1p, Rbx1p, Cdc53p, and an F-box protein) that regulates cell cycle progression by targeting key substrates for degradation; protein abundance increases in response to DNA replication stress; human CDC34 functionally complements the thermosensitivity of the cdc34-2 mutant
YDR055W	PST1	4	563527	564861	W	HPF2	8.15534	181		70.5		Cell wall protein that contains a putative GPI-attachment site; secreted by regenerating protoplasts; up-regulated by activation of the cell integrity pathway, as mediated by Rlm1p; upregulated by cell wall damage via disruption of FKS1; PST1 has a paralog, ECM33, that arose from the whole genome duplication
YDR056C	EMC10	4	565023	565640	C		7.61652	323.5		335		Putative protein of unknown function; subunit of evolutionarily conserved EMC (Endoplasmic Reticulum Membrane Complex) implicated in ERAD (ER-associated degradation) and proper assembly of multi-pass transmembrane (TM) proteins; EMC acts in yeast as an ER-mitochondria tether that interacts with outer membrane protein Tom5p of TOM (Translocase of the Mitochondrial Outer Membrane) complex; YDR056C …
YDR057W	YOS9	4	565927	567555	W		5.03822					ER quality-control lectin; integral subunit of the HRD ligase; participates in efficient ER retention of misfolded proteins by recognizing them and delivering them to Hrd1p; binds to glycans with terminal alpha-1,6 linked mannose on misfolded N-glycosylated proteins and participates in targeting proteins to ERAD; member of the OS-9 protein family
YDR058C	TGL2	4	567723	568703	C	triglyceride lipase	5.1707					Triacylglycerol lipase that is localized to the mitochondria; has lipolytic activity towards triacylglycerols and diacylglycerols when expressed in E. coli
YDR059C	UBC5	4	569234	569770	C	E2 ubiquitin-conjugating protein UBC5	6.21081	48			Abundance_Low	Ubiquitin-conjugating enzyme; mediates selective degradation of short-lived, abnormal, or excess proteins, including histone H3; central component of the cellular stress response; expression is heat inducible; protein abundance increases in response to DNA replication stress; UBC5 has a paralog, UBC4, that arose from the whole genome duplication
YDR060W	MAK21	4	570649	573726	W	RNA-binding ribosome biosynthesis protein MAK21|NOC1	6.91059	427		250.5		Constituent of 66S pre-ribosomal particles; required for large (60S) ribosomal subunit biogenesis; acts as part of a Mak21p-Noc2p-Rrp5p module that associates with nascent pre-rRNA during transcription and has a role in bigenesis of the large ribosomal subunit; involved in nuclear export of pre-ribosomes; required for maintenance of dsRNA virus; homolog of human CAATT-binding protein
YDR061W	YDR061W	4	574164	575783	W		5.69024	78.5		85.5		Protein with similarity to ABC transporter family members; lacks predicted membrane-spanning regions; transcriptionally activated by Yrm1p along with genes involved in multidrug resistance
YDR062W	LCB2	4	576474	578159	W	serine C-palmitoyltransferase LCB2|TSC1|SCS1	7.13125	332.5		292.5		Component of serine palmitoyltransferase; responsible along with Lcb1p for the first committed step in sphingolipid synthesis, which is the condensation of serine with palmitoyl-CoA to form 3-ketosphinganine
YDR063W	AIM7	4	578663	579112	W	GMF1|GMF	7.20699	102		202.7		Protein that interacts with Arp2/3 complex; interacts with Arp2/3 complex to stimulate actin filament debranching and inhibit actin nucleation; has similarity to Cof1p and also to human glia maturation factor (GMF); null mutant displays elevated mitochondrial genome loss
YDR064W	RPS13	4	579458	580452	W	uS15|ribosomal 40S subunit protein S13|YS15|S27a|S15|S13|RPS13C|RPS13B	11.2452					Protein component of the small (40S) ribosomal subunit; homologous to mammalian ribosomal protein S13 and bacterial S15
YDR065W	RRG1	4	580687	581784	W		4.50198		Abundance_Low		Abundance_Low	Protein of unknown function; required for vacuolar acidification and mitochondrial genome maintenance; the authentic, non-tagged protein is detected in highly purified mitochondria in high-throughput studies
YDR066C	RTR2	4	581908	582498	C	putative protein-serine/threonine phosphatase	3.97906		Abundance_Low	67.6		Protein of unknown function; exhibits genetic interactions with Rtr1p; green fluorescent protein (GFP)-fusion protein localizes to the cytoplasm; YDR066C is not an essential gene; relocalizes from nucleus to cytoplasmic foci upon DNA replication stress; RTR2 has a paralog, RTR1, that arose from the whole genome duplication
YDR067C	OCA6	4	582791	583465	C	protein-tyrosine-phosphatase	5.85088		Abundance_Low		Abundance_Low	Cytoplasmic protein required for replication of Brome mosaic virus; S. cerevisiae is a model system for studying positive-strand RNA virus replication; null mutation confers sensitivity to tunicamycin and DTT
YDR068W	DOS2	4	583713	584645	W		6.30364	180		179.5		Protein of unknown function; green fluorescent protein (GFP)-fusion protein localizes to the cytoplasm
YDR069C	DOA4	4	584939	587719	C	ubiquitin-specific protease DOA4|UBP4|SSV7|NPI2|MUT4|DOS1	4.00528		Abundance_Low		Abundance_Low	Ubiquitin hydrolase; deubiquitinates intralumenal vesicle (ILVs) cargo proteins; required for recycling ubiquitin from proteasome-bound ubiquitinated intermediates, acts at the late endosome/prevacuolar compartment to recover ubiquitin from ubiquitinated membrane proteins destined for the vacuole; DOA4 has a paralog, UBP5, that arose from the whole genome duplication
YDR070C	FMP16	4	588098	588379	C		6.58225	99.5		287.8		Protein of unknown function; may be involved in responding to conditions of stress; the authentic, non-tagged protein is detected in highly purified mitochondria in high-throughput studies; protein abundance increases in response to DNA replication stress
YDR071C	PAA1	4	588827	589402	C	polyamine acetyltransferase	8.30407	167.5		61		Polyamine acetyltransferase; acetylates polyamines (e.g. putrescine, spermidine, spermine) and also aralkylamines (e.g. tryptamine, phenylethylamine); may be involved in transcription and/or DNA replication
YDR072C	IPT1	4	589761	591344	C	MIC2|inositolphosphotransferase|KTI6|SYR4	6.42993		Abundance_Low		Abundance_Low	Inositolphosphotransferase; involved in synthesis of mannose-(inositol-P)2-ceramide (M(IP)2C), the most abundant sphingolipid; can mutate to resistance to the antifungals syringomycin E and DmAMP1 and to K. lactis zymocin
YDR073W	SNF11	4	592439	592948	W		5.74094		Abundance_Low		Abundance_Low	Subunit of the SWI/SNF chromatin remodeling complex; involved in transcriptional regulation; interacts with a highly conserved 40-residue sequence of Snf2p; relocates to the cytosol under hypoxic conditions
YDR074W	TPS2	4	593893	596583	W	trehalose-phosphatase TPS2|PFK3|HOG2	6.01357	699		1336.5		Phosphatase subunit of the trehalose-6-P synthase/phosphatase complex; involved in synthesis of the storage carbohydrate trehalose; expression is induced by stress conditions and repressed by the Ras-cAMP pathway; protein abundance increases in response to DNA replication stress
YDR075W	PPH3	4	597156	598082	W	phosphoprotein phosphatase PP4 catalytic subunit PPH3	6.0099	45.5		62		Catalytic subunit of protein phosphatase PP4 complex; Pph3p and Psy2p form active complex, Psy4p may provide substrate specificity; regulates recovery from the DNA damage checkpoint, the gene conversion- and single-strand annealing-mediated pathways of meiotic double-strand break repair and efficient Non-Homologous End-Joining (NHEJ) pathway; involved in activation of Gln3p to alleviate nitrogen …
YDR076W	RAD55	4	598468	599688	W	putative DNA-dependent ATPase RAD55	4.35931		Abundance_Low		Abundance_Low	Protein that stimulates strand exchange; stimulates strand exchange by stabilizing the binding of Rad51p to single-stranded DNA; involved in the recombinational repair of double-strand breaks in DNA during vegetative growth and meiosis; forms heterodimer with Rad57p
YDR077W	SED1	4	600793	601809	W		11.8362	3379		2147.5		Major stress-induced structural GPI-cell wall glycoprotein; associates with translating ribosomes, possible role in mitochondrial genome maintenance; ORF contains two distinct variable minisatellites; SED1 has a paralog, SPI1, that arose from the whole genome duplication
YDR078C	SHU2	4	602198	602869	C		3.30905					Component of Shu complex (aka PCSS complex); Shu complex also includes Psy3, Csm2, Shu1, and promotes error-free DNA repair, Shu complex mediates inhibition of Srs2p function; promotes formation of Rad51p filaments; important for both mitotic and meiotic homologous recombination, and contains a conserved SWIM domain that is necessary for both
YDR079C-A	TFB5	4	603593	603811	C	TFIIH complex subunit TFB5			Abundance_Low		Abundance_Low	Component of RNA polymerase II general transcription factor TFIIH; involved in transcription initiation and in nucleotide-excision repair; relocalizes to the cytosol in response to hypoxia; homolog of Chlamydomonas reinhardtii REX1-S protein involved in DNA repair
YDR079W	PET100	4	603064	603399	W		5.78687		Abundance_Low	74.2		Chaperone that facilitates the assembly of cytochrome c oxidase; integral to the mitochondrial inner membrane; interacts with a subcomplex of subunits VII, VIIa, and VIII (Cox7p, Cox9p, and Cox8p) but not with the holoenzyme
YDR080W	VPS41	4	604008	606986	W	VPL20|VAM2|SVL2|FET2|CVT8	4.52739		Abundance_Low		Abundance_Low	Subunit of the HOPS endocytic tethering complex; vacuole membrane protein that functions as a Rab GTPase effector, interacting specifically with the GTP-bound conformation of Ypt7p, facilitating tethering, docking and promoting membrane fusion events at the late endosome and vacuole; required for both membrane and protein trafficking; Yck3p-mediated phosphorylation regulates the organization of v…
YDR081C	PDC2	4	607304	610081	C		5.21179		Abundance_Low		Abundance_Low	Transcription factor for thiamine-regulated genes; required for expression of the two isoforms of pyruvate decarboxylase (PDC1 and PDC5) along with thiamine biosynthetic genes; binds a DNA sequence in the PDC5 promoter; mutant fails to grow on 2% glucose and thus is scored as inviable under standard conditions
YDR082W	STN1	4	610441	611925	W		4.70473					Telomere end-binding and capping protein; plays a key role with Pol12p in linking telomerase action with completion of lagging strand synthesis, and in a regulatory step required for telomere capping; similar to human Stn1
YDR083W	RRP8	4	612073	613251	W	25S rRNA (adenine645-N1)-methyltransferase	6.72916	104			Abundance_Low	Nucleolar S-adenosylmethionine-dependent rRNA methyltransferase; methylates adenine (m1A) of the large subunit (LSU) rRNA at position 645; involved in pre-rRNA cleavage at site A2; mutation is synthetically lethal with a gar1 mutation; deletion disrupts telomere maintenance by influencing the expression of neighboring gene STN1
YDR084C	TVP23	4	613405	614004	C		6.33147	78.5			Abundance_Low	Integral membrane protein; localized to late Golgi vesicles along with the v-SNARE Tlg2p; green fluorescent protein (GFP)-fusion protein localizes to the cytoplasm in a punctate pattern
YDR085C	AFR1	4	614288	616150	C		4.70678					Protein required for pheromone-induced projection (shmoo) formation; regulates septin architecture during mating; has an RVXF motif that mediates targeting of Glc7p to mating projections; interacts with Cdc12p; AFR1 has a paralog, YER158C, that arose from the whole genome duplication
YDR086C	SSS1	4	616928	617170	C	translocon subunit SSS1	9.19294	432		269		Subunit of the Sec61p translocation complex (Sec61p-Sss1p-Sbh1p); this complex forms a channel for passage of secretory proteins through the endoplasmic reticulum membrane, and of the Ssh1p complex (Ssh1p-Sbh2p-Sss1p); interacts with Ost4p and Wbp1p
YDR087C	RRP1	4	617470	618306	C		7.06523	245		192.5		Essential evolutionarily conserved nucleolar protein; necessary for biogenesis of 60S ribosomal subunits and for processing of pre-rRNAs to mature rRNA; associated with several distinct 66S pre-ribosomal particles
YDR088C	SLU7	4	618497	619645	C	mRNA splicing protein SLU7|SLT17	5.35595		Abundance_Low		Abundance_Low	RNA splicing factor; required for ATP-independent portion of 2nd catalytic step of spliceosomal RNA splicing; interacts with Prp18p; contains zinc knuckle domain
YDR089W	VTC5	4	622112	624721	W		4.87759		Abundance_Low		Abundance_Low	Novel subunit of the vacuolar transporter chaperone complex; vacuolar transmembrane protein that regulates biosynthesis of polyphosphate; deletion reduces and overexpression increases polyP accumulation; SPX domain (Syg1, Pho81, Xpr1)-containing protein involved in phosphate homeostasis; relocalizes from vacuole to cytoplasm upon DNA replication stress
YDR090C	YDR090C	4	625066	625998	C		5.78026	160.5		107		Putative protein of unknown function
YDR091C	RLI1	4	626708	628534	C	Fe-S cluster-binding ribosome biosynthesis protein	6.9245	1224		772		Essential Fe-S protein; required for ribosome biogenesis, translation initiation/termination; facilitates binding of multifactor complex (MFC) of initiation factors to small ribosomal subunit; Dom34-Hbs1 complex and Rli1p work in dissociating inactive ribosomes, thereby facilitating translation restart; forms complex with Lto1p and Yae1p; dependency on ROS-labile FeS clusters, activity in nuclear…
YDR092W	UBC13	4	629876	630605	W	E2 ubiquitin-conjugating protein UBC13	7.47008	360		401.5		E2 ubiquitin-conjugating enzyme; involved in the error-free DNA postreplication repair pathway; interacts with Mms2p to assemble ubiquitin chains at the Ub Lys-63 residue; DNA damage triggers redistribution from the cytoplasm to the nucleus
YDR093W	DNF2	4	631282	636120	W	aminophospholipid-translocating P4-type ATPase DNF2	4.36277	171.5		146.5		Aminophospholipid translocase (flippase); type 4 P-type ATPase; involved in phospholipid translocation, contributing to endocytosis, protein transport, and cellular polarization; localizes primarily to the plasma membrane; localizes to the shmoo tip where it has a redundant role in the cellular response to mating pheromone; DNF2 has a paralog, DNF1, that arose from the whole genome duplication
YDR094W	YDR094W	4	635840	636175	W		4.0005					Dubious open reading frame; unlikely to encode a functional protein, based on available experimental and comparative sequence data; partially overlaps verified ORF DNF2/YDR093W
YDR095C	YDR095C	4	636117	636527	C							Dubious open reading frame; unlikely to encode a functional protein, based on available experimental and comparative sequence data
YDR096W	GIS1	4	637139	639823	W	histone demethylase GIS1	3.83041		Abundance_Low	55.5		Histone demethylase and transcription factor; regulates genes during nutrient limitation; activity modulated by proteasome-mediated proteolysis; has JmjC and JmjN domain in N-terminus that interact, promoting stability and proper transcriptional activity; contains two transactivating domains downstream of Jmj domains and a C-terminal DNA binding domain; relocalizes to the cytosol in response to h…
YDR097C	MSH6	4	640109	643837	C	PMS6|mismatch repair ATPase MSH6|PMS3	4.59065		Abundance_Low		Abundance_Low	Protein required for mismatch repair in mitosis and meiosis; forms a complex with Msh2p to repair both single-base & insertion-deletion mispairs; also involved in interstrand cross-link repair; potentially phosphorylated by Cdc28p
YDR098C	GRX3	4	644178	644930	C	monothiol glutaredoxin GRX3	7.62477	75		104		Glutathione-dependent oxidoreductase; hydroperoxide and superoxide-radical responsive; monothiol glutaredoxin subfamily member along with Grx4p and Grx5p; protects cells from oxidative damage; with Grx4p, binds to Aft1p in iron-replete conditions, promoting its dissociation from promoters; evidence exists indicating that the translation start site is not Met1 as currently annotated, but rather Me…
YDR099W	BMH2	4	653607	654428	W	14-3-3 family protein BMH2|SCD3	9.28494	2218.5		2184		14-3-3 protein, minor isoform; controls proteome at post-transcriptional level, binds proteins and DNA, involved in regulation of many processes including exocytosis, vesicle transport, Ras/MAPK signaling, and rapamycin-sensitive signaling; protein increases in abundance and relative distribution to the nucleus increases upon DNA replication stress; abundance relative to Bmh1p increases during sp…
YDR100W	TVP15	4	655013	655444	W		6.6846	188		231.5		Integral membrane protein; localized to late Golgi vesicles along with the v-SNARE Tlg2p
YDR101C	ARX1	4	655686	657467	C	putative hydrolase	7.14228	748		378		Nuclear export factor for the ribosomal pre-60S subunit; shuttling factor which directly binds FG rich nucleoporins and facilities translocation through the nuclear pore complex; interacts directly with Alb1p; responsible for Tif6p recycling defects in the absence of Rei1; associated with the ribosomal export complex
YDR102C	YDR102C	4	657648	657980	C							Putative protein of unknown function; conserved among S. cerevisiae strains; YDR102C is not an essential gene; homozygous diploid deletion strain exhibits high budding index
YDR103W	STE5	4	658350	661103	W	NUL3|HMD3	5.09353		Abundance_Low		Abundance_Low	Pheromone-responsive MAPK scaffold protein; couples activation of the G-protein-coupled pheromone receptor to MAPK activation; intramolecular interaction of PH and VWA domains blocks activation of assembled signaling cascade components (Ste11p, Ste7p and Fus3p) under basal conditions; Gbeta-gamma (Ste4p-Ste18p)-dependent docking at the plasma membrane and binding of PI(4,5)P2 by the PH domain rel…
YDR104C	SPO71	4	661173	664910	C		3.8779					Meiosis-specific protein required for prospore membrane morphogenesis; localizes to the prospore membrane (PSM) during sporulation; required for PSM elongation and closure; genetically antagonistic to SPO1; recruits Vps13p to the PSM during sporulation; interacts and functions cooperatively with Spo73p; mutants have defects in the PSM, aberrant spore wall formation and reduced PtdIns-phosphate po…
YDR105C	TMS1	4	665349	666770	C		5.83701	141		146		Vacuolar membrane protein of unknown function; is conserved in mammals; predicted to contain eleven transmembrane helices; interacts with Pdr5p, a protein involved in multidrug resistance
YDR106W	ARP10	4	667004	667858	W		1.45243					Component of the dynactin complex; localized to the pointed end of the Arp1p filament; may regulate membrane association of the complex
YDR107C	TMN2	4	669016	671034	C		4.04014					Protein with a role in cellular adhesion and filamentous growth; similar to Tmn3p; member of the evolutionarily conserved Transmembrane Nine family of proteins with nine membrane-spanning segments; TMN2 has a paralog, EMP70, that arose from the whole genome duplication
YDR108W	TRS85	4	671269	673365	W	GSG1|MUM1	4.65672		Abundance_Low	48		Component of transport protein particle (TRAPP) complex III; TRAPPIII is a multimeric guanine nucleotide-exchange factor for the GTPase Ypt1p, regulating endosome-Golgi traffic and required for membrane expansion during autophagy and the CVT pathway; directs Ypt1p to the PAS; late post-replication meiotic role
YDR109C	YDR109C	4	673520	675667	C	putative phosphotransferase	4.84603					Putative kinase
YDR110W	FOB1	4	676102	677802	W	replication fork barrier binding protein FOB1|HRM1	5.65424		Abundance_Low		Abundance_Low	Nucleolar protein that binds the rDNA replication fork barrier site; required for replication fork blocking, recombinational hotspot activity, condensin recruitment to replication fork barrier (RFB), and rDNA repeat segregation; related to retroviral integrases
YDR111C	ALT2	4	678241	679764	C	alanine transaminase ALT2	4.63782	57		55.5		Catalytically inactive alanine transaminase; expression is repressed in the presence of alanine and repression is mediated by Nrg1p; ALT2 has a paralog, ALT1, that arose from the whole genome duplication
YDR112W	IRC2	4	679544	679852	W							Dubious open reading frame; unlikely to encode a functional protein, based on available experimental and comparative sequence data; partially overlaps ALT2/YDR111C; null mutant displays increased levels of spontaneous Rad52p foci
YDR113C	PDS1	4	680496	681617	C	securin	5.61009					Securin; inhibits anaphase by binding separin Esp1p; blocks cyclin destruction and mitotic exit, essential for meiotic progression and mitotic cell cycle arrest; localization is cell-cycle dependent and regulated by Cdc28p phosphorylation
YDR114C	YDR114C	4	681924	682226	C							Putative protein of unknown function; deletion mutant exhibits poor growth at elevated pH and calcium
YDR115W	MRX14	4	682175	682492	W	putative mitochondrial 54S ribosomal protein	6.51892		Abundance_Low	98.8		Putative mitochondrial ribosomal protein of the large subunit; similar to E. coli L34 ribosomal protein; required for respiratory growth, as are most mitochondrial ribosomal proteins; protein increases in abundance and relocalizes to the plasma membrane upon DNA replication stress
YDR116C	MRPL1	4	682724	683581	C	mitochondrial 54S ribosomal protein MRPL1	5.9476	123.5		188.5		Mitochondrial ribosomal protein of the large subunit
YDR117C	TMA64	4	683946	685643	C	RBF64	5.54109					Protein of unknown function that associates with ribosomes; has a putative RNA binding domain; in mammals the corresponding protein, eIF2D, has been shown to possess translation initiation factor activity
YDR118W	APC4	4	685882	687840	W	anaphase promoting complex subunit 4	3.84426		Abundance_Low		Abundance_Low	Subunit of the Anaphase-Promoting Complex/Cyclosome (APC/C); APC/C is a ubiquitin-protein ligase required for degradation of anaphase inhibitors, including mitotic cyclins, during the metaphase/anaphase transition; component of the platform domain of the APC/C, based on structural analysis; relative distribution to the nucleus increases upon DNA replication stress
YDR118W-A	YDR118W-A	4	687768	687884	W							Dubious open reading frame; unlikely to encode a functional protein, based on available experimental and comparative sequence data; identified using a combination of expression profiling and mass spectrometry
YDR119W	VBA4	4	688227	690533	W		5.53358	348.5		280		Protein of unknown function; proposed role as a basic amino acid permease based on phylogeny; GFP-fusion protein localizes to vacuolar membrane; physical interaction with Atg27p suggests a possible role in autophagy; non-essential gene
YDR119W-A	COX26	4	691014	691214	W							Stabilizes or regulates formation of respiratory chain supercomplexes composed of Complex III (ubiquinol-cytochrome c reductase) and Complex IV (cytochrome c oxidase)
YDR120C	TRM1	4	691549	693261	C	tRNA (guanine26-N2)-dimethyltransferase	6.81286	169		128		tRNA methyltransferase; two forms of protein are made by alternative translation starts; localizes to both nucleus and mitochondrion to produce modified base N2,N2-dimethylguanosine in tRNAs in both compartments; nuclear Trm1p is evenly distributed around inner nuclear membrane in WT, but mislocalizes as puncta near ER-nucleus junctions in spindle pole body (SPB) mutants; both Trm1p inner nuclear…
YDR121W	DPB4	4	693585	694175	W	DNA polymerase epsilon noncatalytic subunit	5.67482		Abundance_Low		Failed_QC/Abundance_Low	Subunit of DNA pol epsilon and of ISW2 chromatin accessibility complex; involved in both chromosomal DNA replication and inheritance of telomeric silencing; stabilizes the interaction of Pol epsilon with primer-template DNA, positively affecting the processivity of the polymerase and exonuclease activities of Pol epsilon; interacts with extranucleosomal DNA and acts as anchor point for ISW2 compl…
YDR122W	KIN1	4	694700	697894	W	serine/threonine protein kinase KIN1	5.32257	69		125.7		Serine/threonine protein kinase involved in regulation of exocytosis; localizes to the cytoplasmic face of the plasma membrane; KIN1 has a paralog, KIN2, that arose from the whole genome duplication
YDR123C	INO2	4	698554	699468	C	SCS1|DIE1	6.44926		Abundance_Low		Abundance_Low	Transcription factor; component of the heteromeric Ino2p/Ino4p basic helix-loop-helix transcription activator that binds inositol/choline-responsive elements (ICREs), required for derepression of phospholipid biosynthetic genes in response to inositol depletion; involved in diauxic shift
YDR124W	YDR124W	4	700315	701289	W		4.16245					Putative protein of unknown function; non-essential gene; expression is strongly induced by alpha factor
YDR125C	ECM18	4	701397	702758	C	alpha/beta hydrolase family protein	3.44683		Abundance_Low		Abundance_Low	Protein of unknown function; ECM18 has a paralog, ICT1, that arose from the whole genome duplication
YDR126W	SWF1	4	703234	704244	W	palmitoyltransferase SWF1|PSL10	3.59469					Palmitoyltransferase that acts on transmembrane proteins; including the SNAREs Snc1p, Syn8p, Tlg1p and likely all SNAREs; contains an Asp-His-His-Cys-cysteine rich (DHHC-CRD) domain; may have a role in vacuole fusion
YDR127W	ARO1	4	704484	709250	W	pentafunctional protein ARO1p	6.16521	632		1564.5		Pentafunctional arom protein; catalyzes steps 2 through 6 in the biosynthesis of chorismate, which is a precursor to aromatic amino acids
YDR128W	MTC5	4	709549	712995	W	SEA3	5.20649		Abundance_Low		Abundance_Low	Subunit of SEACAT, a subcomplex of the SEA complex; Mtc1p, along with Rtc1p and Sea4p, redundantly inhibit the TORC1 inhibitory role of the Iml1p/SEACIT (Iml1p-Npr2p-Npr3p) subcomplex, a GAP for GTPase Gtr1p (EGOC subunit) in response to amino acid limitation, thereby resulting in activation of TORC1 signaling; SEA is a coatomer-related complex that associates dynamically with the vacuole; relati…
YDR129C	SAC6	4	713340	715379	C	fimbrin|ABP67	8.239	1438		1561		Fimbrin, actin-bundling protein; cooperates with Scp1p in organization and maintenance of the actin cytoskeleton; phosphorylated by Cdc28p/Clb2p in metaphase on T103, to regulate conformation, and modulate actin filament binding affinity and actin cable dynamics; relocalizes from the plasma membrane to the cytoplasm upon DNA replication stress; human homologs PLS3 and LCP1 implicated in spinocere…
YDR130C	FIN1	4	715747	716622	C		5.32455		Abundance_Low		Abundance_Low	Spindle pole body-related intermediate filament protein; forms cell cycle-specific filaments between spindle pole bodies in dividing cells; localizes to poles and microtubules of spindle during anaphase and contributes to spindle stability; involved in Glc7p localization and regulation; relative distribution to the nucleus increases upon DNA replication stress
YDR131C	YDR131C	4	716790	718460	C		4.3139		Abundance_Low		Abundance_Low	F-box protein subunit of SCF ubiquitin ligase complex; substrate-specific adaptor subunit that recruits substrates to a core ubiquitination complex
YDR132C	YDR132C	4	718816	720303	C		3.42765		Abundance_Low		Abundance_Low	Protein of unknown function; protein increases in abundance and relative distribution to the nucleus increases upon DNA replication stress; YDR132C has a paralog, YLR108C, that arose from the whole genome duplication
YDR133C	YDR133C	4	720962	721297	C		8.82438					Dubious open reading frame; unlikely to encode a functional protein, based on available experimental and comparative sequence data; partially overlaps YDR134C
YDR135C	YCF1	4	723004	727551	C	ATP-binding cassette glutathione S-conjugate transporter YCF1	5.93472	215.5		208.9		Vacuolar glutathione S-conjugate transporter; ABC-C transporter of the ATP-binding cassette family; required for vacuole fusion; forms stable complexes with vacuole fusion machinery; regulates Vam7p recruitment to vacuoles; role in detoxifying metals (Cd, Hg, As); transports GSSG that is not immediately reduced in cytosol to vacuole; transports unconjugated bilirubin, selenodigluthatione, oxidize…
YDR136C	VPS61	4	727711	728283	C							Dubious open reading frame; unlikely to encode a functional protein, based on available experimental and comparative sequence data; not conserved in closely related Saccharomyces species; 4% of ORF overlaps the verified gene RGP1; deletion causes a vacuolar protein sorting defect
YDR137W	RGP1	4	728259	730250	W		5.18223		Abundance_Low		Abundance_Low	Subunit of a Golgi membrane exchange factor (Ric1p-Rgp1p); this complex catalyzes nucleotide exchange on Ypt6p
YDR138W	HPR1	4	730578	732836	W	TRF1	4.83978	54		50		Subunit of THO/TREX complexes; this complex couple transcription elongation with mitotic recombination and with mRNA metabolism and export, subunit of an RNA Pol II complex; regulates lifespan; involved in telomere maintenance; similar to Top1p
YDR139C	RUB1	4	733618	733924	C	NEDD8 family protein RUB1	7.54278		Abundance_Low		Abundance_Low	Ubiquitin-like protein with similarity to mammalian NEDD8; conjugation (neddylation) substrates include the cullins Cdc53p, Rtt101p, and Cul3p; activated by Ula1p and Uba3p (E1 enzyme pair); conjugation mediated by Ubc12p (E2 enzyme)
YDR140W	MTQ2	4	734138	734803	W	S-adenosylmethionine-dependent methyltransferase	5.94757	64			Abundance_Low	S-adenosylmethionine-dependent methyltransferase; subunit of complex with Trm112p that methylates translation release factor Sup45p (eRF1) in the ternary complex eRF1-eRF3-GTP; similar to E.coli PrmC; member of the seven beta-strand family
YDR141C	DOP1	4	734901	739997	C		4.3028	145			Abundance_Low	Golgi-localized, leucine-zipper domain containing protein; involved in endosome to Golgi transport, organization of the ER, establishing cell polarity, and morphogenesis; detected in highly purified mitochondria in high-throughput studies
YDR142C	PEX7	4	740473	741600	C	PEB1|PAS7	4.95334					Peroxisomal signal receptor for peroxisomal matrix proteins; recognizes the N-terminal nonapeptide signal (PTS2); WD repeat protein; defects in human homolog cause lethal rhizomelic chondrodysplasia punctata (RCDP)
YDR143C	SAN1	4	742042	743874	C	ubiquitin-protein ligase SAN1	5.01464					Ubiquitin-protein ligase; involved in proteasome-dependent degradation of aberrant nuclear proteins; targets substrates with regions of exposed hydrophobicity containing 5 or more contiguous hydrophobic residues; contains intrinsically disordered regions that contribute to substrate recognition; prefers a window of exposed hydrophobicity that causes a particular level of protein insolubility, sug…
YDR144C	MKC7	4	744311	746101	C	aspartyl protease|YPS2	4.72709		Abundance_Low		Abundance_Low	GPI-anchored aspartyl protease; member of the yapsin family of proteases involved in cell wall growth and maintenance; shares functions with Yap3p and Kex2p; MKC7 has a paralog, YPS1, that arose from the whole genome duplication
YDR145W	TAF12	4	746738	748357	W	TafII61|TafII68|TAF68|TAF61	6.34011	131		69		Subunit (61/68 kDa) of TFIID and SAGA complexes; involved in RNA polymerase II transcription initiation and in chromatin modification, similar to histone H2A; overexpression of the human ortholog, TAF12, an oncogene involved in the formation of choroid plexus carcinomas, results in dosage chromosomal instability (dCIN) in a human cell line similar to the dCIN observed in yeast overexpressors
YDR146C	SWI5	4	748613	750742	C	DNA-binding transcription factor SWI5	6.04354		Abundance_Low		Abundance_Low	Transcription factor that recruits Mediator and Swi/Snf complexes; activates transcription of genes expressed at the M/G1 phase boundary and in G1 phase; required for expression of the HO gene controlling mating type switching; localization to nucleus occurs during G1 and appears to be regulated by phosphorylation by Cdc28p kinase; SWI5 has a paralog, ACE2, that arose from the whole genome duplic…
YDR147W	EKI1	4	751631	753235	W	bifunctional choline kinase/ethanolamine kinase EKI1	5.74035		Abundance_Low		Abundance_Low	Ethanolamine kinase; primarily responsible for phosphatidylethanolamine synthesis via the CDP-ethanolamine pathway; exhibits some choline kinase activity, thus contributing to phosphatidylcholine synthesis via the CDP-choline pathway; EKI1 has a paralog, CKI1, that arose from the whole genome duplication
YDR148C	KGD2	4	753675	755066	C	alpha-ketoglutarate dehydrogenase KGD2	7.11021	73		211		Dihydrolipoyl transsuccinylase; component of the mitochondrial alpha-ketoglutarate dehydrogenase complex, which catalyzes the oxidative decarboxylation of alpha-ketoglutarate to succinyl-CoA in the TCA cycle; phosphorylated
YDR149C	YDR149C	4	755555	756262	C							Dubious open reading frame; unlikely to encode a functional protein, based on available experimental and comparative sequence data; overlaps the verified gene NUM1/YDR150W; null mutation blocks anaerobic growth
YDR150W	NUM1	4	755628	763874	W	PAC12	4.3641	75		83.5		Protein required for nuclear migration; component of the mitochondria-ER-cortex-ancor (MECA); required for the association of mitochondria with the cell cortex and for accurate distribution of mitochondrial network; interacts with Mdm36p to link the ER and mitochondria at the cortex; localizes to the mother cell cortex and the bud tip; may mediate interactions of dynein and cytoplasmic microtubul…
YDR151C	CTH1	4	764178	765155	C	putative mRNA-binding protein CTH1	5.34212					Member of the CCCH zinc finger family; similar to mammalian Tis11 protein, which activates transcription and also has a role in mRNA degradation; may function with Tis11p in iron homeostasis; CTH1 has a paralog, TIS11, that arose from the whole genome duplication
YDR152W	GIR2	4	765706	766503	W		7.31842	572		272		Highly-acidic RWD domain-containing cytoplasmic protein; forms a highly conserved complex with Rbg2p that is responsible for efficient cell growth under amino acid starvation and binds translational activator Gcn1p in dose-dependent manner according to stress level; associates with translating ribosomes; intrinsically unstructured protein whose stability is enhanced upon binding Rbg2p
YDR153C	ENT5	4	766736	767971	C		6.73491	422.5		273.5		Protein containing an N-terminal epsin-like domain; involved in clathrin recruitment and traffic between the Golgi and endosomes; associates with the clathrin adaptor Gga2p, clathrin adaptor complex AP-1, and clathrin
YDR154C	YDR154C	4	768403	768753	C		11.5412					Dubious open reading frame; unlikely to encode a functional protein, based on available experimental and comparative sequence data; null mutant exhibits synthetic phenotype with alpha-synuclein
YDR155C	CPR1	4	768512	769000	C	peptidylprolyl isomerase CPR1|CPH1|CYP1	11.3915	6004		3841.4		Cytoplasmic peptidyl-prolyl cis-trans isomerase (cyclophilin); catalyzes the cis-trans isomerization of peptide bonds N-terminal to proline residues; binds the drug cyclosporin A; N-terminally propionylated in vivo; protein abundance increases in response to DNA replication stress
YDR156W	RPA14	4	769525	769938	W	DNA-directed RNA polymerase I subunit RPA14|A14	7.29389	139		105		RNA polymerase I subunit A14
YDR157W	YDR157W	4	769931	770332	W							Putative protein of unknown function; conserved across S. cerevisiae strains
YDR158W	HOM2	4	770357	771454	W	aspartate-semialdehyde dehydrogenase|THR2	9.34495	821		1654		Aspartic beta semi-aldehyde dehydrogenase; catalyzes the second step in the common pathway for methionine and threonine biosynthesis; expression regulated by Gcn4p and the general control of amino acid synthesis
YDR159W	SAC3	4	771877	775782	W	LEP1	4.8836		Abundance_Low		Abundance_Low	mRNA export factor; required for biogenesis of the small ribosomal subunit; component of TREX-2 complex (Sac3p-Thp1p-Sus1p-Cdc31p) involved in transcription elongation and mRNA export from the nucleus; involved in post-transcriptional tethering of active genes to the nuclear periphery and to non-nascent mRNP; similar to the human germinal center-associated nuclear protein (GANP)
YDR160W	SSY1	4	776163	778721	W	RAA1|SHR10	4.65849					Component of the SPS plasma membrane amino acid sensor system; senses external amino acid concentration and transmits intracellular signals that result in regulation of expression of amino acid permease genes; other members are Ssy1p, Ptr3p, and Ssy5p
YDR161W	ACL4	4	779043	780206	W		6.5962	223		139.5		Specific assembly chaperone for ribosomal protein Rpl4p; binds to an evolutionarily conserved surface extension of nascent Rpl4p and chaperones Rpl4p until its assembly into the pre-ribosome; transcriptionally co-regulated with rRNA and ribosome biosynthesis genes
YDR162C	NBP2	4	780390	781100	C		5.96604					Protein involved in the HOG (high osmolarity glycerol) pathway; negatively regulates Hog1p by recruitment of phosphatase Ptc1p the Pbs2p-Hog1p complex; interacts with Bck1p and down regulates the cell wall integrity pathway; found in the nucleus and cytoplasm, contains an SH3 domain and a Ptc1p binding domain (PBM)
YDR163W	CWC15	4	781423	781950	W	U2-type spliceosomal complex subunit CWC15	6.27739					Non-essential protein involved in pre-mRNA splicing; component of a complex containing Cef1p; has similarity to S. pombe Cwf15p
YDR164C	SEC1	4	782041	784215	C		5.46398		Abundance_Low		Abundance_Low	Sm-like protein involved in docking and fusion of exocytic vesicles; binds to assembled SNARE complexes at the membrane and stimulates membrane fusion; localization to sites of secretion (bud neck and bud tip) is dependent on SNARE function; interacts directly with essential exocyst subunit Sec6p
YDR165W	TRM82	4	784871	786205	W		6.85493	354.5		188.5		Catalytic subunit of a tRNA methyltransferase complex; Trm8p and Trm82p comprise an enzyme that catalyzes a methyl-transfer from S-adenosyl-l-methionine to the N(7) atom of guanine at position 46 in tRNA; Trm8 lacks catalytic activity if not bound to Trm82p; relocalizes to the cytosol in response to hypoxia; mutation in human ortholog WDR4 causes microcephalic primordial dwarfism
YDR166C	SEC5	4	786306	789221	C	exocyst subunit SEC5	4.98538	128.5		115.9		Essential 107kDa subunit of the exocyst complex; the exocyst mediates polarized targeting and tethering of post-Golgi secretory vesicles to active sites of exocytosis at the plasma membrane prior to SNARE-mediated fusion; involved in assembly of the exocyst complex; required with Sec3p for ER inheritance where it promotes anchoring of the cortical ER at the bud tip
YDR167W	TAF10	4	789449	790069	W	TafII25|TAF25|TAF23	6.9394	103		90.5		Subunit (145 kDa) of TFIID and SAGA complexes; involved in RNA polymerase II transcription initiation and in chromatin modification
YDR168W	CDC37	4	790328	791848	W	SMO1	7.09654	448.5		400.5		Essential Hsp90p co-chaperone; necessary for passage through the START phase of the cell cycle; stabilizes protein kinase nascent chains and participates along with Hsp90p in their folding
YDR169C	STB3	4	792348	793889	C		5.90761	96		91.5		Ribosomal RNA processing element (RRPE)-binding protein; involved in the glucose-induced transition from quiescence to growth; restricted to nucleus in quiescent cells, released into cytoplasm after glucose repletion; binds Sin3p; relative distribution to the nucleus increases upon DNA replication stress
YDR169C-A	YDR169C-A	4	794574	794723	C							Putative protein of unknown function; identified by fungal homology and RT-PCR
YDR170C	SEC7	4	796193	802222	C	Arf family guanine nucleotide exchange factor SEC7	5.47412	322		249.7		Guanine nucleotide exchange factor (GEF) for ADP ribosylation factors; involved in proliferation of the Golgi, intra-Golgi transport and ER-to-Golgi transport; found in the cytoplasm and on Golgi-associated coated vesicles
YDR171W	HSP42	4	806621	807748	W	heat shock protein HSP42	6.19879	183		232.5		Small heat shock protein (sHSP) with chaperone activity; forms barrel-shaped oligomers that suppress unfolded protein aggregation; involved in cytoskeleton reorganization after heat shock; protein abundance increases and forms cytoplasmic foci in response to DNA replication stress
YDR172W	SUP35	4	808324	810381	W	translation termination factor GTPase eRF3|eRF3|[PSI(+)]|[PSI]|SUP36|SUP2|SUF12|SAL3|PNM2|GST1	8.0592	2617		2233.5		Translation termination factor eRF3; has a role in mRNA deadenylation and decay; altered protein conformation creates the [PSI(+)] prion that modifies cellular fitness, alters translational fidelity by affecting reading frame selection, and results in a nonsense suppressor phenotype; many stress-response genes are repressed in the presence of [PSI(+)]
YDR173C	ARG82	4	810565	811632	C	inositol polyphosphate multikinase|ARGRIII|IPK2|ARGR3	4.09807		Abundance_Low		Abundance_Low	Inositol polyphosphate multikinase (IPMK); sequentially phosphorylates Ins(1,4,5)P3 to form Ins(1,3,4,5,6)P5; also has diphosphoinositol polyphosphate synthase activity; regulates arginine-, phosphate-, and nitrogen-responsive genes
YDR174W	HMO1	4	812110	812850	W	HSM2	8.52928	574.5		668.5		Chromatin associated high mobility group (HMG) family member; involved in compacting, bending, bridging and looping DNA; rDNA-binding component that regulates transcription from RNA polymerase I promoters; regulates start site selection of ribosomal protein genes via RNA polymerase II promoters; role in genome maintenance; associates with a 5'-3' DNA helicase and Fpr1p, a prolyl isomerase; reloca…
YDR175C	RSM24	4	813193	814152	C	mitochondrial 37S ribosomal protein RSM24	6.23194	185		172.5		Mitochondrial ribosomal protein of the small subunit
YDR176W	NGG1	4	814452	816560	W	histone acetyltransferase NGG1|SWI7|ADA3	6.00406		Abundance_Low		Abundance_Low	Subunit of chromatin modifying histone acetyltransferase complexes; member of the ADA complex, the SAGA complex, and the SLIK complex; transcriptional regulator involved in glucose repression of Gal4p-regulated genes
YDR177W	UBC1	4	816878	817525	W	E2 ubiquitin-conjugating protein UBC1	8.11985	263		119		Ubiquitin-conjugating enzyme; key E2 partner with Ubc4p for the anaphase-promoting complex (APC); mediates selective degradation of short-lived and abnormal proteins; plays a role in vesicle biogenesis and ER-associated protein degradation (ERAD); component of the cellular stress response; protein abundance increases in response to DNA replication stress key E2 partner with Ubc4p for the anaphase…
YDR178W	SDH4	4	817950	818495	W	succinate dehydrogenase membrane anchor subunit SDH4|ACN18	6.35033	55.5		140.5		Membrane anchor subunit of succinate dehydrogenase (SDH); involved in coupling the oxidation of succinate to the transfer of electrons to ubiquinone as part of the TCA cycle and the mitochondrial respiratory chain; has similarity to human SDH subunit D (SDHD), which is implicated in paraganglioma
YDR179C	CSN9	4	818708	819196	C		5.10091		Abundance_Low	48.3		Subunit of the Cop9 signalosome; Cop9 signalosome is required for deneddylation, or removal of the ubiquitin-like protein Rub1p from Cdc53p (cullin); involved in adaptation to pheromone signaling
YDR179W-A	NVJ3	4	819433	820824	W							Protein with a potential role in tethering ER and vacuoles; localizes to nucleus-vacuole junctions in an Mdm1p-dependent manner; contains a lipid-binding PXA domain
YDR180W	SCC2	4	821295	825776	W	cohesin-loading factor complex subunit SCC2	3.25127		Abundance_Low		Abundance_Low	Subunit of cohesin loading factor (Scc2p-Scc4p); a complex required for loading of cohesin complexes onto chromosomes; involved in establishing sister chromatid cohesion during DSB repair via histone H2AX; promotes gene expression program that supports translational fidelity; evolutionarily-conserved adherin; relocalizes to cytosol in response to hypoxia; human disorder Cornelia de Lange syndrome…
YDR181C	SAS4	4	825910	827355	C		5.30351		Abundance_Low		Abundance_Low	Subunit of the SAS complex (Sas2p, Sas4p, Sas5p); acetylates free histones and nucleosomes and regulates transcriptional silencing; required for the HAT activity of Sas2p
YDR182W	CDC1	4	827582	829057	W	putative lipid phosphatase CDC1|ESP2|DSR1|DSC1	5.76574		Abundance_Low		Abundance_Low	Putative mannose-ethanolamine phosphate phosphodiesterase; involved in GPI-anchor remodeling prior to the attachment of cell wall proteins to beta 1,3-glucan, removing ethanolamine phosphate from the first mannose of GPI anchors; mutants display elevated Ca2+-dependent signaling resulting in secondary actin polarization and Golgi inheritance defects; enzyme is Mn2+-dependent; mutants have cell di…
YDR182W-A	YDR182W-A	4	829151	829354	W							Putative protein of unknown function; identified by fungal homology and RT-PCR
YDR183C-A	YDR183C-A	4	830397	830654	C							Dubious open reading frame unlikely to encode a functional protein; identified by fungal homology and RT-PCR
YDR183W	PLP1	4	829585	830277	W		5.37353		Abundance_Low		Abundance_Low	Protein that interacts with CCT (chaperonin containing TCP-1) complex; has a role in actin and tubulin folding; has weak similarity to phosducins, which are G-protein regulators
YDR184C	ATC1	4	830629	831513	C	LIC4	5.98687		Abundance_Low		Abundance_Low	Nuclear protein; possibly involved in regulation of cation stress responses and/or in the establishment of bipolar budding pattern; relative distribution to the nucleus decreases upon DNA replication stress
YDR185C	UPS3	4	831934	832473	C	GEP2	3.70578		Abundance_Low		Abundance_Low	Mitochondrial protein of unknown function; similar to Ups1p and Ups2p which are involved in regulation of mitochondrial cardiolipin and phosphatidylethanolamine levels; null is viable but interacts synthetically with ups1 and ups2 mutations; UPS3 has a paralog, UPS2, that arose from the whole genome duplication
YDR186C	SND1	4	832859	835492	C		6.21594	50.5			Abundance_Low	Protein involved in SRP-independent targeting of substrates to the ER; component of an alternative ER targeting pathway that has partial functional redundancy with the GET pathway; preference for substrates with downstream transmembrane domains; interacts with Env10p/Snd2p and Pho88p/Snd3p; can compensate for loss of SRP; may interact with ribosomes, based on co-purification experiments; GFP-fusi…
YDR187C	YDR187C	4	836228	836746	C							Dubious open reading frame; unlikely to encode a functional protein, based on available experimental and comparative sequence data; partially overlaps the verified, essential ORF CCT6/YDR188W
YDR188W	CCT6	4	836421	838061	W	chaperonin-containing T-complex subunit CCT6|TCP20|TCP6|HTR3	7.64769					Subunit of the cytosolic chaperonin Cct ring complex; related to Tcp1p, essential protein that is required for the assembly of actin and tubulins in vivo; contains an ATP-binding motif
YDR189W	SLY1	4	838392	840392	W	syntaxin-binding protein	6.37399	361		278.9		Hydrophilic protein involved in ER/Golgi vesicle trafficking; SM (Sec1/Munc-18) family protein that binds the tSNARE Sed5p and stimulates its assembly into a trans-SNARE membrane-protein complex
YDR190C	RVB1	4	840604	841995	C	RuvB family ATP-dependent DNA helicase pontin|TIP49|TIH1|TIP49A	7.58909	519.5		365		ATP-dependent DNA helicase, also known as pontin; member of the AAA+ and RuvB-like protein families; similar to Rvb2p; conserved component of multiple complexes including the INO80 complex, the Swr1 complex, and the R2TP complex (Rvb1-Rvb2-Tah1-Pih1); involved in multiple processes such as chromatin remodeling, box C/D snoRNP assembly, and RNA polymerase II assembly
YDR191W	HST4	4	842337	843449	W	NAD-dependent histone deacetylase HST4	3.99994		Abundance_Low		Abundance_Low	NAD(+)-dependent protein deacetylase; deacetylation targets are primarily mitochondrial proteins; involved along with Hst3p in silencing at telomeres, cell cycle progression, radiation resistance, genomic stability and short-chain fatty acid metabolism; accumulates in mitochondria in response to biotin starvation and may link biotin metabolism with energy homeostasis; member of the Sir2 family an…
YDR192C	NUP42	4	843569	844861	C	FG-nucleoporin NUP42|UIP1|RIP1	4.77144					FG-nucleoporin component of central core of the nuclear pore complex; also part of the nuclear pore complex (NPC) cytoplasmic filaments; contributes directly to nucleocytoplasmic transport and maintenance of the NPC permeability barrier and is involved in gene tethering at the nuclear periphery; interacts with Gle1p
YDR193W	YDR193W	4	844554	844952	W				Abundance_Low		Abundance_Low	Dubious open reading frame; unlikely to encode a functional protein, based on available experimental and comparative sequence data
YDR194C	MSS116	4	845952	847946	C	ATP-dependent RNA helicase	6.83968	427		421.5		Mitochondrial transcription elongation factor; DEAD-box protein; required for efficient splicing of mitochondrial Group I and II introns; non-polar RNA helicase that also facilities strand annealing; promotes RNA folding by stabilizing an early assembly intermediate
YDR194W-A	YDR194W-A	4	848071	848223	W							Putative protein of unknown function; identified by fungal homology and RT-PCR
YDR195W	REF2	4	848599	850200	W	RNA-processing protein REF2	5.19822	79		63		RNA-binding protein; involved in the cleavage step of mRNA 3'-end formation prior to polyadenylation, and in snoRNA maturation; part of holo-CPF subcomplex APT, which associates with 3'-ends of snoRNA- and mRNA-encoding genes; putative regulatory subunit of type 1 protein phosphatase Glc7p, required for actomyosin ring formation, and for timely dephosphorylation and release of Bnr1p from the divi…
YDR196C	CAB5	4	850274	850999	C	putative dephospho-CoA kinase	6.37563	84.5		80.5		Subunit of the CoA-Synthesizing Protein Complex (CoA-SPC); subunits of this complex are: Cab2p, Cab3p, Cab4p, Cab5p, Sis2p and Vhs3p; probable dephospho-CoA kinase (DPCK) that catalyzes the last step in coenzyme A biosynthesis; null mutant lethality is complemented by human homolog DCAKD and by E. coli coaE (encoding DPCK); detected in purified mitochondria in high-throughput studies; also locali…
YDR197W	CBS2	4	851228	852397	W	CBP7	5.13799		Abundance_Low		Abundance_Low	Mitochondrial translational activator of the COB mRNA; interacts with translating ribosomes, acts on the COB mRNA 5'-untranslated leader
YDR198C	RKM2	4	852533	853972	C	protein-lysine N-methyltransferase	5.13551					Ribosomal protein lysine methyltransferase; responsible for trimethylation of the lysine residue at position 3 of Rpl12Ap and Rpl12Bp
YDR199W	YDR199W	4	854175	854540	W							Dubious open reading frame; unlikely to encode a functional protein, based on available experimental and comparative sequence data; partially overlaps the verified gene VPS64/YDR200C; computationally predicted to have thiol-disulfide oxidoreductase activity
YDR200C	VPS64	4	854279	856093	C	FAR9	5.13185		Abundance_Low		Abundance_Low	Protein required for cytoplasm to vacuole targeting of proteins; forms a complex with Far3p and Far7p to Far11p involved in recovery from pheromone-induced cell cycle arrest; mutant has increased aneuploidy tolerance; VPS64 has a paralog, FAR10, that arose from the whole genome duplication
YDR201W	SPC19	4	856317	856814	W		5.94888		Abundance_Low		Abundance_Low	Essential subunit of the Dam1 complex (aka DASH complex); complex couples kinetochores to the force produced by MT depolymerization thereby aiding in chromosome segregation; also localized to nuclear side of spindle pole body
YDR202C	RAV2	4	856898	857953	C		5.63785	52		51		Subunit of RAVE complex (Rav1p, Rav2p, Skp1p); the RAVE complex associates with the V1 domain of the vacuolar membrane (H+)-ATPase (V-ATPase) and promotes assembly and reassembly of the holoenzyme
YDR203W	YDR203W	4	857682	857999	W							Dubious open reading frame; unlikely to encode a functional protein, based on available experimental and comparative sequence data; almost completely overlaps ORF RAV2/YDR202C
YDR204W	COQ4	4	858137	859144	W	ubiquinone biosynthesis protein COQ4	5.81473		Abundance_Low		Abundance_Low	Protein with a role in ubiquinone (Coenzyme Q) biosynthesis; possibly functioning in stabilization of Coq7p; located on matrix face of mitochondrial inner membrane; component of a mitochondrial ubiquinone-synthesizing complex; human homolog COQ4 can complement yeast coq4 null mutant
YDR205W	MSC2	4	859346	861520	W	metal cation transporter MSC2	4.28141	93.5			Abundance_Low	Endoplasmic reticulum zinc transporter; part of a heterodimeric transporter with Zrg17p that transfers zinc from the cytosol to the ER lumen; member of the cation diffusion facilitator family of efflux pumps; localizes to ER and nucleus; mutations affect the cellular distribution of zinc and also confer defects in meiotic recombination between homologous chromatids
YDR206W	EBS1	4	862054	864708	W		5.86721					Protein involved in translation inhibition and nonsense-mediated decay; interacts with cap binding protein Cdc33p and with Nam7p; localizes to P-bodies upon glucose starvation; mRNA abundance regulated by mRNA decay factors; EBS1 has a paralog, EST1, that arose from the whole genome duplication
YDR207C	UME6	4	865012	867522	C	DNA-binding transcriptional regulator UME6|RIM16|NIM2|CAR80	4.57316	45.5			Failed_QC/Abundance_Low	Rpd3L histone deacetylase complex subunit; key transcriptional regulator of early meiotic genes; involved in chromatin remodeling and transcriptional repression via DNA looping; binds URS1 upstream regulatory sequence, represses transcription by recruiting conserved histone deacetylase Rpd3p (through co-repressor Sin3p) and chromatin-remodeling factor Isw2p; couples metabolic responses to nutriti…
YDR208W	MSS4	4	868224	870563	W	1-phosphatidylinositol-4-phosphate 5-kinase	5.77517		Abundance_Low	59.5		Phosphatidylinositol-4-phosphate 5-kinase; involved in actin cytoskeleton organization and cell morphogenesis; multicopy suppressor of stt4 mutation
YDR209C	YDR209C	4	871036	871449	C		1.32118					Putative protein of unknown function; conserved among S. cerevisiae strains; YDR209C is not an essential gene; partially overlaps uncharacterized gene YDR210W
YDR210W	YDR210W	4	871074	871301	W		5.93822	159.5		77		Predicted tail-anchored plasma membrane protein; contains a conserved CYSTM module; related proteins in other organisms may be involved in response to stress; green fluorescent protein (GFP)-fusion protein localizes to the cell periphery
YDR211W	GCD6	4	884727	886865	W	translation initiation factor eIF2B catalytic subunit epsilon	6.78473	487		327.5		Catalytic epsilon subunit of the translation initiation factor eIF2B; eIF2B is the guanine-nucleotide exchange factor for eIF2; activity subsequently regulated by phosphorylated eIF2; first identified as a negative regulator of GCN4 expression; forms cytoplasmic foci upon DNA replication stress
YDR212W	TCP1	4	887232	888911	W	chaperonin-containing T-complex alpha subunit TCP1|CCT1	7.50591					Alpha subunit of chaperonin-containing T-complex; complex mediates protein folding in the cytosol; involved in actin cytoskeleton maintenance; overexpression in neurons suppresses formation of pathogenic conformations of huntingtin protein
YDR213W	UPC2	4	889751	892492	W	MOX4	3.81233		Abundance_Low		Abundance_Low	Sterol regulatory element binding protein; induces sterol biosynthetic genes, upon sterol depletion; acts as a sterol sensor, binding ergosterol in sterol rich conditions; relocates from intracellular membranes to perinuclear foci upon sterol depletion; redundant activator of filamentation with ECM22, up-regulating the expression of filamentous growth genes; contains a Zn[2]-Cys[6] binuclear clus…
YDR214W	AHA1	4	892875	893927	W		6.99206	812.5		542		Co-chaperone that binds Hsp82p and activates its ATPase activity; plays a role in determining prion variants; similar to Hch1p; expression is regulated by stresses such as heat shock; protein abundance increases in response to DNA replication stress
YDR215C	YDR215C	4	894089	894502	C							Dubious open reading frame; unlikely to encode a functional protein, based on available experimental and comparative sequence data; null mutant displays elevated sensitivity to expression of a mutant huntingtin fragment or of alpha-synuclein
YDR216W	ADR1	4	895035	899006	W	DNA-binding transcription factor ADR1	3.21985		Abundance_Low		Failed_QC/Abundance_Low	Carbon source-responsive zinc-finger transcription factor; required for transcription of the glucose-repressed gene ADH2, of peroxisomal protein genes, and of genes required for ethanol, glycerol, and fatty acid utilization
YDR217C	RAD9	4	899551	903480	C	chromatin-binding protein RAD9	4.446		Abundance_Low		Abundance_Low	DNA damage-dependent checkpoint protein; required for cell-cycle arrest in G1/S, intra-S, and G2/M, plays a role in postreplication repair (PRR) pathway; transmits checkpoint signal by activating Rad53p and Chk1p; hyperphosphorylated by Mec1p and Tel1p; multiple cyclin dependent kinase consensus sites and the C-terminal BRCT domain contribute to DNA damage checkpoint activation; Rad9p Chk1 Activa…
YDR218C	SPR28	4	903781	905052	C	septin SPR28						Sporulation-specific homolog of the CDC3/10/11/12 family of genes; meiotic septin expressed at high levels during meiotic divisions and ascospore formation; the yeast CDC3/10/11/12 family is a family of bud neck microfilament genes
YDR219C	MFB1	4	905455	906852	C		5.6859	56.5		53		Mitochondria-associated F-box protein; involved in maintenance of normal mitochondrial morphology; interacts with Skp1p through the F-box motif; preferentially localizes to the mother cell during budding
YDR220C	YDR220C	4	907000	907293	C		1.5587					Dubious open reading frame; unlikely to encode a functional protein, based on available experimental and comparative sequence data; null mutant exhibits synthetic phenotype with alpha-synuclein
YDR221W	GTB1	4	907330	909438	W		4.73359	64.5		49.5		Glucosidase II beta subunit, forms a complex with alpha subunit Rot2p; involved in removal of two glucose residues from N-linked glycans during glycoprotein biogenesis in the ER; relocalizes from ER to cytoplasm upon DNA replication stress
YDR222W	YDR222W	4	910054	911301	W		4.95022		Abundance_Low		Abundance_Low	Protein of unknown function; green fluorescent protein (GFP)-fusion protein localizes to the cytoplasm in a punctate pattern; YDR222W has a paralog, YLR225C, that arose from the whole genome duplication
YDR223W	CRF1	4	912099	913502	W		1.60336					Transcriptional corepressor; involved in repression of ribosomal protein (RP) gene transcription via the TOR signaling pathway which promotes accumulation of Crf1p in the nucleus; role in repression of RP genes varies by strain; CRF1 has a paralog, IFH1, that arose from the whole genome duplication
YDR224C	HTB1	4	914317	914712	C	histone H2B|SPT12	11.0602		Failed_QC	14072.8		Histone H2B; core histone protein required for chromatin assembly and chromosome function; nearly identical to HTB2; Rad6p-Bre1p-Lge1p mediated ubiquitination regulates reassembly after DNA replication, transcriptional activation, meiotic DSB formation and H3 methylation
YDR225W	HTA1	4	915530	915928	W	histone H2A|SPT11|H2A1	10.9015		Abundance_Low		Abundance_Low	Histone H2A; core histone protein required for chromatin assembly and chromosome function; one of two nearly identical subtypes (see also HTA2); DNA damage-dependent phosphorylation by Mec1p facilitates DNA repair; acetylated by Nat4p; N-terminally propionylated in vivo
YDR226W	ADK1	4	916486	917154	W	adenylate kinase ADK1|AKY2|AKY1	9.57533	3870.5		3286.5		Adenylate kinase, required for purine metabolism; localized to the cytoplasm and the mitochondria; lacks cleavable signal sequence; protein abundance increases in response to DNA replication stress; mutations affecting Adk1p catalytic activity deregulate expression of phosphate utilization genes PHO5 and PHO84; human homolog AK1 can complement yeast adk1 mutant
YDR227W	SIR4	4	917571	921647	W	chromatin-silencing protein SIR4|UTH2|STE9|ASD1	4.68209	70		119.5		SIR protein involved in assembly of silent chromatin domains; silent information regulator (SIR) along with SIR2 and SIR3; involved in assembly of silent chromatin domains at telomeres and the silent mating-type loci; some alleles of SIR4 prolong lifespan; required for telomere hypercluster formation in quiescent yeast cells
YDR228C	PCF11	4	921926	923806	C		5.0763		Failed_QC		Failed_QC/Abundance_Low	mRNA 3' end processing factor; essential component of cleavage and polyadenylation factor IA (CF IA), involved in pre-mRNA 3' end processing and in transcription termination; binds C-terminal domain of largest subunit of RNA pol II (Rpo21p); required for gene looping; relocalizes to the cytosol in response to hypoxia
YDR229W	IVY1	4	924785	926146	W		5.77787	123.5		100.5		Phospholipid-binding protein that interacts with both Ypt7p and Vps33p; may partially counteract the action of Vps33p and vice versa, localizes to the rim of the vacuole as cells approach stationary phase
YDR230W	YDR230W	4	926223	926570	W		0.920647					Dubious open reading frame; unlikely to encode a functional protein, based on available experimental and comparative sequence data; partially overlaps the verified gene COX20/YDR231C
YDR231C	COX20	4	926293	926910	C		6.65704		Abundance_Low	66.5		Mitochondrial inner membrane protein; required for proteolytic processing of Cox2p and its assembly into cytochrome c oxidase
YDR232W	HEM1	4	927452	929098	W	5-aminolevulinate synthase|OLE3|CYD1	5.74093	160		222		5-aminolevulinate synthase; catalyzes the first step in the heme biosynthetic pathway; an N-terminal signal sequence is required for localization to the mitochondrial matrix; expression is regulated by Hap2p-Hap3p; has a pyridoxal phosphate cofactor whose insertion is mediated by Mcx1p
YDR233C	RTN1	4	929470	930357	C		9.0945	2599.5		2648		Reticulon protein; involved in nuclear pore assembly and maintenance of tubular ER morphology; promotes membrane curvature; regulates the ER asymmetry-induced inheritance block during ER stress; role in ER-derived peroxisomal biogenesis; increases tubular ER when overexpressed; mutants have reduced phosphatidylserine transfer between the ER and mitochondria; interacts with exocyst subunit Sec6p, …
YDR234W	LYS4	4	931129	933210	W	homoaconitate hydratase LYS4|LYS3	7.1222	284		1259		Homoaconitase; catalyzes the conversion of homocitrate to homoisocitrate, which is a step in the lysine biosynthesis pathway
[truncated: 5,308 more rows]
