# Supplementary material for: Simultaneous quantification of mRNA and protein in single cells reveals post-transcriptional effects of genetic variation
Source: eLife journal article supplement (doi:10.7554/elife.60645), 2020-11-16
Supplement: supp [file elife-60645-supp-v1.zip › elife_poa_e60645_Supplementary_file_2.xlsx]

## Sheet: Sheet1
Table S2: List of yeast strains
Reference name	Short description	origin	genetic background	built from	genotype	ploidy	mating type	shown in figure	used to build
YFA0129	BY (a)	acquired from ResGen, Invitrogen Corporation	BY	na	his3∆1 leu2∆0 met15∆0 ura3∆0	1n	a		YFA1003, YFA1002, YFA1004, YFA1005, YFA1007, YFA0589
YFA0992	BY (a)	acquired from ATCC Cat#201388	BY	na	his3∆1 leu2∆0 met15∆0 ura3∆0	1n	a		YFA1371, YFA1375
YFA0005	S288C (BY DNA template)	acquired from Frank Albert, Kruglyak lab, UCLA, YLK1879	BY	na	HIS3 LEU2	1n	a		BFA0078, BFA0023, BFA0031, YFA0033, YPFA-ChB1, YFA1315-1330, YFA1383-1392
YFA0006	RM (alpha)	acquired from Frank Albert, Kruglyak lab, UCLA, YLK1950	RM	na	AMN1-BY ho∆::HphMX flo8∆::NatMX	1n	alpha		YAK1 allele testing
EFA0004	RM (a) SGA-Marker	acquired from Frank Albert, Kruglyak lab, UCLA	RM	na	can1Δ::STE2pr-URA3 leu2Δ0 his3Δ::ClonNAT ura3Δ ho::HYG AMN1(BY allele)	1n	a		YFA0033
EFA0003	BY (alpha) SGA-Marker	acquired from Frank Albert, Kruglyak lab, UCLA	BY	na	can1Δ::STE2pr-URA3 lyp1Δ his3Δ1 leu2Δ0 ura3Δ0 met15Δ0 LYS2+	1n	alpha		YFA0196
YFA0001	S288C Z3EV	acquired from Scott McIsaac-Bolstein lab	S288c	na	ura3∆ leu2∆0::ACT1pr-Z3EV-NatMX	1n	alpha		BFA0029
YFA0017	BY TDH3-GFP	acquired from GFP collection, Kruglyak lab, UCLA	BY	na	his3∆1 leu2∆0 met15∆0 ura3∆0 YGR192C-GFP-HIS3MX	1n	a		YFA0215, YFA-ChB1 (not stored)
YFA0013	BY GPD1-GFP	acquired from GFP collection, Kruglyak lab, UCLA	BY	na	his3∆1 leu2∆0 met15∆0 ura3∆0 YDL022W-GFP-HIS3MX	1n	a		YFA0205, YFA0458, YFA1203, YFA1205
YFA0457	BY ARO8-GFP	acquired from GFP collection, Kruglyak lab, UCLA	BY	na	his3∆1 leu2∆0 met15∆0 ura3∆0 YGL202W-GFP-HIS3	1n	a		YFA0496
YFA0451	BY BMH2-GFP	acquired from GFP collection, Kruglyak lab, UCLA	BY	na	his3∆1 leu2∆0 met15∆0 ura3∆0 YDR099W-GFP-HIS3	1n	a		YFA0462
YFA0454	BY MTD1-GFP	acquired from GFP collection, Kruglyak lab, UCLA	BY	na	his3∆1 leu2∆0 met15∆0 ura3∆0 YKR080W-GFP-HIS3	1n	a		YFA0478
YFA0452	BY UGP1-GFP	acquired from GFP collection, Kruglyak lab, UCLA	BY	na	his3∆1 leu2∆0 met15∆0 ura3∆0 YKL035W-GFP-HIS3	1n	a		YFA0476
YFA0196	BY CRISPR reporter	built	BY	EFA0003	can1Δ::STE2pr-URA3 NPR2::pdCAS9-KanMX-mCherry lyp1Δ his3Δ leu2Δ ura3Δ met15Δ LYS2+	1n	alpha		YFA0222, YFA0226, YFA-ChB1 (not stored)
YFA0033	RM HIS+ SGA-Marker	built	RM	EFA0004	can1Δ::STE2pr-URA3 leu2Δ0 HIS3(S288c allele) ura3Δ ho::HYG AMN1(BY allele)	1n	a		YFA0135
YFA0135	RM HIS+ SGA-Marker	built	RM	EFA0001, YFA0033	can1Δ::STE2pr-URA3 leu2Δ0 HIS3(S288c allele) ura3Δ ho::HYG AMN1(BY allele)	1n	alpha		YFA0198
YFA0198	RM CRISPR reporter	built	RM	YFA0135	can1Δ::STE2pr-URA3 NPR2::pdCAS9-KanMX-mCherry leu2Δ HIS3(S288c allele) ura3Δ ho::HYG AMN1(BY allele)	1n	alpha		YFA0464, YFA0498, YFA0468, YFA0482, YFA0480, YFA1009, YFA1008, YFA1010, YFA1011, YFA1013
YFA0508	RM mCherry-cons	built	RM	YFA0135	can1Δ::STE2pr-URA3 leu2Δ0 HIS3(S288c allele) ura3Δ ho::HYG AMN1(BY allele) npr2Δ::KanMX-dCAS9-LactZ-mCherry-C3gRNAt(int)	1n	alpha		YFA0589
YFA0283	BY CRISPR reporter Z3EV	built	BY	YFA0196	can1Δ::STE2pr-URA3 NPR2::pdCAS9-KanMX-mCherry lyp1Δ his3Δ leu2Δ0 trp1::pZ3EV-C3gRNA-tCYC1-NatMX-Z3EV ura3Δ met15Δ LYS2+	1n	alpha	2B-C, 3, S5	na
YFA0285	RM CRISPR reporter Z3EV	built	RM	YFA0198	can1Δ::STE2pr-URA3 NPR2::pdCAS9-KanMX-mCherry leu2Δ HIS3(S288c allele) trp1::pZ3EV-C3gRNA-tCYC1-NatMX-Z3EV ura3Δ ho::HYG AMN1(BY allele)	1n	alpha	S3	na
YFA0215	BY TDH3-GFP-gRNA (CloNAT)	built	BY	YFA0017	his3∆1 leu2∆0 met15∆0 ura3∆0 YGR192C-GFP-C3gRNA-tCYC1-NatMX	1n	a		YFA0222
YFA0205	BY GPD1-GFP-gRNA (CloNAT)	built	BY	YFA0013	his3∆1 leu2∆0 met15∆0 ura3∆0 YDL022W-GFP-C3gRNA-tCYC1-NatMX	1n	a		YFA0226
YFA0458	BY GPD1-GFP-gRNA	built	BY	YFA0013	his3∆1 leu2∆0 met15∆0 ura3∆0 YDL022W-GFP-C3gRNA-tCYC1-LEU2	1n	a		YFA0464
YFA0496	BY ARO8-GFP-gRNA	built	BY	YFA0457	his3∆1 leu2∆0 met15∆0 ura3∆0 YGL202W-GFP-C3gRNA-tCYC1-LEU2	1n	a		YFA0498
YFA0462	BY BMH2-GFP-gRNA	built	BY	YFA0451	his3∆1 leu2∆0 met15∆0 ura3∆0 YDR099W-GFP-C3gRNA-tCYC1-LEU2	1n	a		YFA0468
YFA0478	BY MTD1-GFP-gRNA	built	BY	YFA0454	his3∆1 leu2∆0 met15∆0 ura3∆0 YKR080W-GFP-C3gRNA-tCYC1-LEU2	1n	a		YFA0482
YFA0476	BY UGP1-GFP-gRNA	built	BY	YFA0452	his3∆1 leu2∆0 met15∆0 ura3∆0 YKL035W-GFP-C3gRNA-tCYC1-LEU2	1n	a		YFA0480
YFA1003	BY CYC1-GFP-gRNA	built	BY	YFA0129	his3∆1 leu2∆0 met15∆0 ura3∆0 YJR048W-GFP-C3gRNA-tCYC1-LEU2	1n	a		YFA1009
YFA1002	BY OLE1-GFP-gRNA	built	BY	YFA0129	his3∆1 leu2∆0 met15∆0 ura3∆0 YGL055W-GFP-C3gRNA-tCYC1-LEU2	1n	a		YFA1008
YFA1004	BY TOP1-GFP-gRNA	built	BY	YFA0129	his3∆1 leu2∆0 met15∆0 ura3∆0 YLL028W-GFP-C3gRNA-tCYC1-LEU2	1n	a		YFA1010
YFA1005	BY CTS1-GFP-gRNA	built	BY	YFA0129	his3∆1 leu2∆0 met15∆0 ura3∆0 YLR286C-GFP-C3gRNA-tCYC1-LEU2	1n	a		YFA1011
YFA1007	BY RPS10A-GFP-gRNA	built	BY	YFA0129	his3∆1 leu2∆0 met15∆0 ura3∆0 YOR293W-GFP-C3gRNA-tCYC1-LEU2	1n	a		YFA1013
YFA-ChB1 (not stored)	BYxBY TDH3-GFP CRISPR reporter	built	BY x BY	YFA0017, YFA0196	CAN1/can1Δ::STE2pr-URA3 NPR2/npr2Δ::pdCAS9-KanMX-mCherry LIP1/lyp1Δ his3∆1/his3Δ leu2∆0/leu2Δ ura3∆0/ura3Δ met15∆0/met15Δ LYS2+ YGR192C-GFP-HIS3MX/YGR192C	2n	a/alpha	1B-C-D	na
YFA0222	BYxBY TDH3-GFP-gRNA CRISPR reporter	built	BY x BY	YFA0215, YFA0196	CAN1/can1Δ::STE2pr-URA3 NPR2/npr2Δ::pdCAS9-KanMX-mCherry LIP1/lyp1Δ his3∆1/his3Δ leu2∆0/leu2Δ ura3∆0/ura3Δ met15∆0/met15Δ LYS2+ YGR192C-GFP-C3gRNA-tCYC1-NatMX/YGR192C	2n	a/alpha	1B-C-D	na
YFA0226	BYxBY GPD1-GFP-gRNA CRISPR reporter	built	BY x BY	YFA0205, YFA0196	CAN1/can1Δ::STE2pr-URA3 NPR2/npr2Δ::pdCAS9-KanMX-mCherry LIP1/lyp1Δ his3∆1/his3Δ leu2∆0/leu2Δ ura3∆0/ura3Δ met15∆0/met15Δ LYS2+ YDL022W-GFP-C3gRNA-tCYC1-NatMX/YDL022W	2n	a/alpha	1B-C-D	na
YFA0589	BYxRM mCherry-cons	built	BY x RM	YFA0129, YFA0508	CAN1/can1Δ::STE2pr-URA3 NPR2/npr2Δ::KanMX-dCAS9-LactZ-mCherry-C3gRNAt(int) leu2∆0/leu2Δ his3∆1/HIS3(S288c allele) ura3∆0/ura3Δ met15∆0/MET15 ho/ho∆::HYG AMN1/AMN1(BY allele)	2n	a/alpha	S7, S8, S11	mapping populations control
YFA0464	BYxRM GPD1-GFP-gRNA CRISPR reporter	built	BY x RM	YFA0458, YFA0198	CAN1/can1Δ::STE2pr-URA3 NPR2/npr2Δ::pdCAS9-KanMX-mCherry leu2∆0/leu2Δ his3∆1/HIS3(S288c allele) ura3∆0/ura3Δ met15∆0/MET15 ho/ho∆::HYG AMN1/AMN1(BY allele) YDL022W-GFP-C3gRNA-tCYC1-LEU2/YDL022W	2n	a/alpha	5A, 6A, S7, S8, S10	mapping populations
YFA0498	BYxRM ARO8-GFP-gRNA CRISPR reporter	built	BY x RM	YFA0496, YFA0198	CAN1/can1Δ::STE2pr-URA3 NPR2/npr2Δ::pdCAS9-KanMX-mCherry leu2∆0/leu2Δ his3∆1/HIS3(S288c allele) ura3∆0/ura3Δ met15∆0/MET15 ho/ho∆::HYG AMN1/AMN1(BY allele) YGL202W-GFP-C3gRNA-tCYC-LEU2/YGL202W	2n	a/alpha	5A, 6A, S7, S8	mapping populations
YFA0468	BYxRM BMH2-GFP-gRNA CRISPR reporter	built	BY x RM	YFA0462, YFA0198	CAN1/can1Δ::STE2pr-URA3 NPR2/npr2Δ::pdCAS9-KanMX-mCherry leu2∆0/leu2Δ his3∆1/HIS3(S288c allele) ura3∆0/ura3Δ met15∆0/MET15 ho/ho∆::HYG AMN1/AMN1(BY allele) YDR099W-GFP-C3gRNA-tCYC1-LEU2/YDR099W	2n	a/alpha	5A, 6A, S7, S8	mapping populations
YFA0482	BYxRM MTD1-GFP-gRNA CRISPR reporter	built	BY x RM	YFA0478, YFA0198	CAN1/can1Δ::STE2pr-URA3 NPR2/npr2Δ::pdCAS9-KanMX-mCherry leu2∆0/leu2Δ his3∆1/HIS3(S288c allele) ura3∆0/ura3Δ met15∆0/MET15 ho/ho∆::HYG AMN1/AMN1(BY allele) YKR080W-GFP-C3gRNA-tCYC1-LEU2/YKR080W	2n	a/alpha	5A, 6A, S7, S8	mapping populations
YFA0480	BYxRM UGP1-GFP-gRNA CRISPR reporter	built	BY x RM	YFA0476, YFA0198	CAN1/can1Δ::STE2pr-URA3 NPR2/npr2Δ::pdCAS9-KanMX-mCherry leu2∆0/leu2Δ his3∆1/HIS3(S288c allele) ura3∆0/ura3Δ met15∆0/MET15 ho/ho∆::HYG AMN1/AMN1(BY allele) YKL035W-GFP-C3gRNA-tCYC-LEU2/YKL035W	2n	a/alpha	5A, 6A, S7, S8	mapping populations
YFA1009	BYxRM CYC1-GFP-gRNA CRISPR reporter	built	BY x RM	YFA1003, YFA0198	CAN1/can1Δ::STE2pr-URA3 NPR2/npr2Δ::pdCAS9-KanMX-mCherry leu2∆0/leu2Δ his3∆1/HIS3(S288c allele) ura3∆0/ura3Δ met15∆0/MET15 ho/ho∆::HYG AMN1/AMN1(BY allele) YJR048W-GFP-C3gRNA-tCYC-LEU2/YJR048W	2n	a/alpha	5A, 6A, S7, S8	mapping populations
YFA1008	BYxRM OLE1-GFP-gRNA CRISPR reporter	built	BY x RM	YFA1002, YFA0198	CAN1/can1Δ::STE2pr-URA3 NPR2/npr2Δ::pdCAS9-KanMX-mCherry leu2∆0/leu2Δ his3∆1/HIS3(S288c allele) ura3∆0/ura3Δ met15∆0/MET15 ho/ho∆::HYG AMN1/AMN1(BY allele) YGL055W-GFP-C3gRNA-tCYC-LEU2/YGL055W	2n	a/alpha	5A, 6A, S7, S8	mapping populations
YFA1010	BYxRM TOP1-GFP-gRNA CRISPR reporter	built	BY x RM	YFA1004, YFA0198	CAN1/can1Δ::STE2pr-URA3 NPR2/npr2Δ::pdCAS9-KanMX-mCherry leu2∆0/leu2Δ his3∆1/HIS3(S288c allele) ura3∆0/ura3Δ met15∆0/MET15 ho/ho∆::HYG AMN1/AMN1(BY allele) YLL028W-GFP-C3gRNA-tCYC-LEU2/YLL028W	2n	a/alpha	5A, 6A, S7, S8	mapping populations
YFA1011	BYxRM CTS1-GFP-gRNA CRISPR reporter	built	BY x RM	YFA1005, YFA0198	CAN1/can1Δ::STE2pr-URA3 NPR2/npr2Δ::pdCAS9-KanMX-mCherry leu2∆0/leu2Δ his3∆1/HIS3(S288c allele) ura3∆0/ura3Δ met15∆0/MET15 ho/ho∆::HYG AMN1/AMN1(BY allele) YLR286C-GFP-C3gRNA-tCYC-LEU2/YLR286C	2n	a/alpha	5A, 6A, S7, S8	mapping populations
YFA1013	BYxRM RPS10A-GFP-gRNA CRISPR reporter	built	BY x RM	YFA1007, YFA0198	CAN1/can1Δ::STE2pr-URA3 NPR2/npr2Δ::pdCAS9-KanMX-mCherry leu2∆0/leu2Δ his3∆1/HIS3(S288c allele) ura3∆0/ura3Δ met15∆0/MET15 ho/ho∆::HYG AMN1/AMN1(BY allele) YOR293W-GFP-C3gRNA-tCYC-LEU2/YOR293W	2n	a/alpha	5A, 6A, S7, S8	mapping populations
YFA1203	BY GPD1-GFP insertion2	built	BY	YFA0013	leu2Δ0 his3∆1 ura3∆0 met15∆0 YDL022W-GFP-HIS3MX chrX-149965::KanMX	1n	a		YFA1240, YFA1242
YFA1205	BY GPD1-GFP insertion4	built	BY	YFA0013	leu2Δ0 his3∆1 ura3∆0 met15∆0 YDL022W-GFP-HIS3MX chrX-160674::KanMX	1n	a		YFA1246, YFA1248
YFA1240	BY GPD1-GFP insertion1-2	built	BY	YFA1203	leu2Δ0 his3∆1 ura3∆0 met15∆0 YDL022W-GFP-HIS3MX chrX-149965::KanMX chrX-146490::hphMX	1n	a	7A-C	YPFA-ChB1, YFA1315-1330
YFA1242	BY GPD1-GFP insertion2-3	built	BY	YFA1203	leu2Δ0 his3∆1 ura3∆0 met15∆0 YDL022W-GFP-HIS3MX chrX-149965::KanMX chrX-155306::hphMX	1n	a	7A	YPFA-ChB1
YFA1244	BY GPD1-GFP insertion3-4	built	BY	YFA1205	leu2Δ0 his3∆1 ura3∆0 met15∆0 YDL022W-GFP-HIS3MX chrX-160674::KanMX chrX-155306::hphMX	1n	a	7A	YPFA-ChB1
YFA1246	BY GPD1-GFP insertion4-5	built	BY	YFA1205	leu2Δ0 his3∆1 ura3∆0 met15∆0 YDL022W-GFP-HIS3MX chrX-160674::KanMX chrX-165072::hphMX	1n	a	7A	YPFA-ChB1
YFA1371	BY yak1∆	built	BY	YFA0992	his3∆1 leu2∆0 met15∆0 ura3∆0 YJL141C::hphMK	1n	a		YFA1377, YFA1383-1392
YFA1375	BY GPD1-GFP-gRNA	built	BY	YFA0992	his3∆1 leu2∆0 met15∆0 ura3∆0 YDL022W-GFP-gRNAc3-LEU2	1n	a		YPFA-ChB2
YFA1377	BY GPD1-GFP-gRNA yak1∆ CRISP reporter	built	BY	YFA1371	his3∆1 leu2∆0 met15∆0 ura3∆0 YJL141C::hphMK YDL022W-GFP-gRNAc3-LEU2	1n	a		YPFA-ChB2
YPFA-ChB1-A1	BY GPD1-GFP swapA-BY c1	built	BY	YFA1240	leu2Δ0 his3∆1 ura3∆0 met15∆0 YDL022W-GFP-HIS3MX chrX-146490:149965-BY	1n	a	7A-B	na
YPFA-ChB1-B1	BY GPD1-GFP swapA-BY c2	built	BY	YFA1240	leu2Δ0 his3∆1 ura3∆0 met15∆0 YDL022W-GFP-HIS3MX chrX-146490:149965-BY	1n	a	7A-B	na
YPFA-ChB1-C1	BY GPD1-GFP swapA-BY c3	built	BY	YFA1240	leu2Δ0 his3∆1 ura3∆0 met15∆0 YDL022W-GFP-HIS3MX chrX-146490:149965-BY	1n	a	7A-B	na
YPFA-ChB1-D1	BY GPD1-GFP swapA-BY c4	built	BY	YFA1240	leu2Δ0 his3∆1 ura3∆0 met15∆0 YDL022W-GFP-HIS3MX chrX-146490:149965-BY	1n	a	7A-B	na
YPFA-ChB1-E1	BY GPD1-GFP swapA-BY c5	built	BY	YFA1240	leu2Δ0 his3∆1 ura3∆0 met15∆0 YDL022W-GFP-HIS3MX chrX-146490:149965-BY	1n	a	7A-B	na
YPFA-ChB1-F1	BY GPD1-GFP swapA-BY c6	built	BY	YFA1240	leu2Δ0 his3∆1 ura3∆0 met15∆0 YDL022W-GFP-HIS3MX chrX-146490:149965-BY	1n	a	7A-B	na
YPFA-ChB1-G1	BY GPD1-GFP swapA-BY c7	built	BY	YFA1240	leu2Δ0 his3∆1 ura3∆0 met15∆0 YDL022W-GFP-HIS3MX chrX-146490:149965-BY	1n	a	7A-B	na
YPFA-ChB1-H1	BY GPD1-GFP swapA-BY c8	built	BY	YFA1240	leu2Δ0 his3∆1 ura3∆0 met15∆0 YDL022W-GFP-HIS3MX chrX-146490:149965-BY	1n	a	7A-B	na
YPFA-ChB1-A5	BY GPD1-GFP swapA-RM c1	built	BY	YFA1240	leu2Δ0 his3∆1 ura3∆0 met15∆0 YDL022W-GFP-HIS3MX chrX-146490:149965-RM	1n	a	7A-B-C-D	na
YPFA-ChB1-B5	BY GPD1-GFP swapA-RM c2	built	BY	YFA1240	leu2Δ0 his3∆1 ura3∆0 met15∆0 YDL022W-GFP-HIS3MX chrX-146490:149965-RM	1n	a	7A-B-C-D	na
YPFA-ChB1-C5	BY GPD1-GFP swapA-RM c3	built	BY	YFA1240	leu2Δ0 his3∆1 ura3∆0 met15∆0 YDL022W-GFP-HIS3MX chrX-146490:149965-RM	1n	a	7A-B-C-D	na
YPFA-ChB1-D5	BY GPD1-GFP swapA-RM c4	built	BY	YFA1240	leu2Δ0 his3∆1 ura3∆0 met15∆0 YDL022W-GFP-HIS3MX chrX-146490:149965-RM	1n	a	7A-B-C-D	na
YPFA-ChB1-E5	BY GPD1-GFP swapA-RM c5	built	BY	YFA1240	leu2Δ0 his3∆1 ura3∆0 met15∆0 YDL022W-GFP-HIS3MX chrX-146490:149965-RM	1n	a	7A-B-C-D	na
YPFA-ChB1-F5	BY GPD1-GFP swapA-RM c6	built	BY	YFA1240	leu2Δ0 his3∆1 ura3∆0 met15∆0 YDL022W-GFP-HIS3MX chrX-146490:149965-RM	1n	a	7A-B-C-D	na
YPFA-ChB1-G5	BY GPD1-GFP swapA-RM c7	built	BY	YFA1240	leu2Δ0 his3∆1 ura3∆0 met15∆0 YDL022W-GFP-HIS3MX chrX-146490:149965-RM	1n	a	7A-B-C-D	na
YPFA-ChB1-H5	BY GPD1-GFP swapA-RM c8	built	BY	YFA1240	leu2Δ0 his3∆1 ura3∆0 met15∆0 YDL022W-GFP-HIS3MX chrX-146490:149965-RM	1n	a	7A-B-C-D	na
YPFA-ChB1-A2	BY GPD1-GFP swapB-BY c1	built	BY	YFA1242	leu2Δ0 his3∆1 ura3∆0 met15∆0 YDL022W-GFP-HIS3MX chrX-149965:155306-BY	1n	a	7A-B	na
YPFA-ChB1-B2	BY GPD1-GFP swapB-BY c2	built	BY	YFA1242	leu2Δ0 his3∆1 ura3∆0 met15∆0 YDL022W-GFP-HIS3MX chrX-149965:155306-BY	1n	a	7A-B	na
YPFA-ChB1-C2	BY GPD1-GFP swapB-BY c3	built	BY	YFA1242	leu2Δ0 his3∆1 ura3∆0 met15∆0 YDL022W-GFP-HIS3MX chrX-149965:155306-BY	1n	a	7A-B	na
YPFA-ChB1-D2	BY GPD1-GFP swapB-BY c4	built	BY	YFA1242	leu2Δ0 his3∆1 ura3∆0 met15∆0 YDL022W-GFP-HIS3MX chrX-149965:155306-BY	1n	a	7A-B	na
YPFA-ChB1-E2	BY GPD1-GFP swapB-BY c5	built	BY	YFA1242	leu2Δ0 his3∆1 ura3∆0 met15∆0 YDL022W-GFP-HIS3MX chrX-149965:155306-BY	1n	a	7A-B	na
YPFA-ChB1-F2	BY GPD1-GFP swapB-BY c6	built	BY	YFA1242	leu2Δ0 his3∆1 ura3∆0 met15∆0 YDL022W-GFP-HIS3MX chrX-149965:155306-BY	1n	a	7A-B	na
YPFA-ChB1-G2	BY GPD1-GFP swapB-BY c7	built	BY	YFA1242	leu2Δ0 his3∆1 ura3∆0 met15∆0 YDL022W-GFP-HIS3MX chrX-149965:155306-BY	1n	a	7A-B	na
YPFA-ChB1-H2	BY GPD1-GFP swapB-BY c8	built	BY	YFA1242	leu2Δ0 his3∆1 ura3∆0 met15∆0 YDL022W-GFP-HIS3MX chrX-149965:155306-BY	1n	a	7A-B	na
YPFA-ChB1-A6	BY GPD1-GFP swapB-RM c1	built	BY	YFA1242	leu2Δ0 his3∆1 ura3∆0 met15∆0 YDL022W-GFP-HIS3MX chrX-149965:155306-RM	1n	a	7A-B	na
YPFA-ChB1-B6	BY GPD1-GFP swapB-RM c2	built	BY	YFA1242	leu2Δ0 his3∆1 ura3∆0 met15∆0 YDL022W-GFP-HIS3MX chrX-149965:155306-RM	1n	a	7A-B	na
YPFA-ChB1-C6	BY GPD1-GFP swapB-RM c3	built	BY	YFA1242	leu2Δ0 his3∆1 ura3∆0 met15∆0 YDL022W-GFP-HIS3MX chrX-149965:155306-RM	1n	a	7A-B	na
YPFA-ChB1-D6	BY GPD1-GFP swapB-RM c4	built	BY	YFA1242	leu2Δ0 his3∆1 ura3∆0 met15∆0 YDL022W-GFP-HIS3MX chrX-149965:155306-RM	1n	a	7A-B	na
YPFA-ChB1-E6	BY GPD1-GFP swapB-RM c5	built	BY	YFA1242	leu2Δ0 his3∆1 ura3∆0 met15∆0 YDL022W-GFP-HIS3MX chrX-149965:155306-RM	1n	a	7A-B	na
YPFA-ChB1-F6	BY GPD1-GFP swapB-RM c6	built	BY	YFA1242	leu2Δ0 his3∆1 ura3∆0 met15∆0 YDL022W-GFP-HIS3MX chrX-149965:155306-RM	1n	a	7A-B	na
YPFA-ChB1-G6	BY GPD1-GFP swapB-RM c7	built	BY	YFA1242	leu2Δ0 his3∆1 ura3∆0 met15∆0 YDL022W-GFP-HIS3MX chrX-149965:155306-RM	1n	a	7A-B	na
YPFA-ChB1-H6	BY GPD1-GFP swapB-RM c8	built	BY	YFA1242	leu2Δ0 his3∆1 ura3∆0 met15∆0 YDL022W-GFP-HIS3MX chrX-149965:155306-RM	1n	a	7A-B	na
YPFA-ChB1-A3	BY GPD1-GFP swapC-BY c1	built	BY	YFA1244	leu2Δ0 his3∆1 ura3∆0 met15∆0 YDL022W-GFP-HIS3MX chrX-155306:160674-BY	1n	a	7A-B	na
YPFA-ChB1-B3	BY GPD1-GFP swapC-BY c2	built	BY	YFA1244	leu2Δ0 his3∆1 ura3∆0 met15∆0 YDL022W-GFP-HIS3MX chrX-155306:160674-BY	1n	a	7A-B	na
YPFA-ChB1-C3	BY GPD1-GFP swapC-BY c3	built	BY	YFA1244	leu2Δ0 his3∆1 ura3∆0 met15∆0 YDL022W-GFP-HIS3MX chrX-155306:160674-BY	1n	a	7A-B	na
YPFA-ChB1-D3	BY GPD1-GFP swapC-BY c4	built	BY	YFA1244	leu2Δ0 his3∆1 ura3∆0 met15∆0 YDL022W-GFP-HIS3MX chrX-155306:160674-BY	1n	a	7A-B	na
YPFA-ChB1-E3	BY GPD1-GFP swapC-BY c5	built	BY	YFA1244	leu2Δ0 his3∆1 ura3∆0 met15∆0 YDL022W-GFP-HIS3MX chrX-155306:160674-BY	1n	a	7A-B	na
YPFA-ChB1-F3	BY GPD1-GFP swapC-BY c6	built	BY	YFA1244	leu2Δ0 his3∆1 ura3∆0 met15∆0 YDL022W-GFP-HIS3MX chrX-155306:160674-BY	1n	a	7A-B	na
YPFA-ChB1-G3	BY GPD1-GFP swapC-BY c7	built	BY	YFA1244	leu2Δ0 his3∆1 ura3∆0 met15∆0 YDL022W-GFP-HIS3MX chrX-155306:160674-BY	1n	a	7A-B	na
YPFA-ChB1-H3	BY GPD1-GFP swapC-BY c8	built	BY	YFA1244	leu2Δ0 his3∆1 ura3∆0 met15∆0 YDL022W-GFP-HIS3MX chrX-155306:160674-BY	1n	a	7A-B	na
YPFA-ChB1-A7	BY GPD1-GFP swapC-RM c1	built	BY	YFA1244	leu2Δ0 his3∆1 ura3∆0 met15∆0 YDL022W-GFP-HIS3MX chrX-155306:160674-RM	1n	a	7A-B	na
YPFA-ChB1-B7	BY GPD1-GFP swapC-RM c2	built	BY	YFA1244	leu2Δ0 his3∆1 ura3∆0 met15∆0 YDL022W-GFP-HIS3MX chrX-155306:160674-RM	1n	a	7A-B	na
YPFA-ChB1-C7	BY GPD1-GFP swapC-RM c3	built	BY	YFA1244	leu2Δ0 his3∆1 ura3∆0 met15∆0 YDL022W-GFP-HIS3MX chrX-155306:160674-RM	1n	a	7A-B	na
YPFA-ChB1-D7	BY GPD1-GFP swapC-RM c4	built	BY	YFA1244	leu2Δ0 his3∆1 ura3∆0 met15∆0 YDL022W-GFP-HIS3MX chrX-155306:160674-RM	1n	a	7A-B	na
YPFA-ChB1-E7	BY GPD1-GFP swapC-RM c5	built	BY	YFA1244	leu2Δ0 his3∆1 ura3∆0 met15∆0 YDL022W-GFP-HIS3MX chrX-155306:160674-RM	1n	a	7A-B	na
YPFA-ChB1-F7	BY GPD1-GFP swapC-RM c6	built	BY	YFA1244	leu2Δ0 his3∆1 ura3∆0 met15∆0 YDL022W-GFP-HIS3MX chrX-155306:160674-RM	1n	a	7A-B	na
YPFA-ChB1-G7	BY GPD1-GFP swapC-RM c7	built	BY	YFA1244	leu2Δ0 his3∆1 ura3∆0 met15∆0 YDL022W-GFP-HIS3MX chrX-155306:160674-RM	1n	a	7A-B	na
YPFA-ChB1-H7	BY GPD1-GFP swapC-RM c8	built	BY	YFA1244	leu2Δ0 his3∆1 ura3∆0 met15∆0 YDL022W-GFP-HIS3MX chrX-155306:160674-RM	1n	a	7A-B	na
YPFA-ChB1-A4	BY GPD1-GFP swapD-BY c1	built	BY	YFA1246	leu2Δ0 his3∆1 ura3∆0 met15∆0 YDL022W-GFP-HIS3MX chrX-160674:165072-BY	1n	a	7A-B	na
YPFA-ChB1-B4	BY GPD1-GFP swapD-BY c2	built	BY	YFA1246	leu2Δ0 his3∆1 ura3∆0 met15∆0 YDL022W-GFP-HIS3MX chrX-160674:165072-BY	1n	a	7A-B	na
YPFA-ChB1-C4	BY GPD1-GFP swapD-BY c3	built	BY	YFA1246	leu2Δ0 his3∆1 ura3∆0 met15∆0 YDL022W-GFP-HIS3MX chrX-160674:165072-BY	1n	a	7A-B	na
YPFA-ChB1-D4	BY GPD1-GFP swapD-BY c4	built	BY	YFA1246	leu2Δ0 his3∆1 ura3∆0 met15∆0 YDL022W-GFP-HIS3MX chrX-160674:165072-BY	1n	a	7A-B	na
YPFA-ChB1-E4	BY GPD1-GFP swapD-BY c5	built	BY	YFA1246	leu2Δ0 his3∆1 ura3∆0 met15∆0 YDL022W-GFP-HIS3MX chrX-160674:165072-BY	1n	a	7A-B	na
YPFA-ChB1-F4	BY GPD1-GFP swapD-BY c6	built	BY	YFA1246	leu2Δ0 his3∆1 ura3∆0 met15∆0 YDL022W-GFP-HIS3MX chrX-160674:165072-BY	1n	a	7A-B	na
YPFA-ChB1-G4	BY GPD1-GFP swapD-BY c7	built	BY	YFA1246	leu2Δ0 his3∆1 ura3∆0 met15∆0 YDL022W-GFP-HIS3MX chrX-160674:165072-BY	1n	a	7A-B	na
YPFA-ChB1-H4	BY GPD1-GFP swapD-BY c8	built	BY	YFA1246	leu2Δ0 his3∆1 ura3∆0 met15∆0 YDL022W-GFP-HIS3MX chrX-160674:165072-BY	1n	a	7A-B	na
YPFA-ChB1-A8	BY GPD1-GFP swapD-RM c1	built	BY	YFA1246	leu2Δ0 his3∆1 ura3∆0 met15∆0 YDL022W-GFP-HIS3MX chrX-160674:165072-RM	1n	a	7A-B	na
YPFA-ChB1-B8	BY GPD1-GFP swapD-RM c2	built	BY	YFA1246	leu2Δ0 his3∆1 ura3∆0 met15∆0 YDL022W-GFP-HIS3MX chrX-160674:165072-RM	1n	a	7A-B	na
YPFA-ChB1-C8	BY GPD1-GFP swapD-RM c3	built	BY	YFA1246	leu2Δ0 his3∆1 ura3∆0 met15∆0 YDL022W-GFP-HIS3MX chrX-160674:165072-RM	1n	a	7A-B	na
YPFA-ChB1-D8	BY GPD1-GFP swapD-RM c4	built	BY	YFA1246	leu2Δ0 his3∆1 ura3∆0 met15∆0 YDL022W-GFP-HIS3MX chrX-160674:165072-RM	1n	a	7A-B	na
YPFA-ChB1-E8	BY GPD1-GFP swapD-RM c5	built	BY	YFA1246	leu2Δ0 his3∆1 ura3∆0 met15∆0 YDL022W-GFP-HIS3MX chrX-160674:165072-RM	1n	a	7A-B	na
YPFA-ChB1-F8	BY GPD1-GFP swapD-RM c6	built	BY	YFA1246	leu2Δ0 his3∆1 ura3∆0 met15∆0 YDL022W-GFP-HIS3MX chrX-160674:165072-RM	1n	a	7A-B	na
YPFA-ChB1-G8	BY GPD1-GFP swapD-RM c7	built	BY	YFA1246	leu2Δ0 his3∆1 ura3∆0 met15∆0 YDL022W-GFP-HIS3MX chrX-160674:165072-RM	1n	a	7A-B	na
YPFA-ChB1-H8	BY GPD1-GFP swapD-RM c8	built	BY	YFA1246	leu2Δ0 his3∆1 ura3∆0 met15∆0 YDL022W-GFP-HIS3MX chrX-160674:165072-RM	1n	a	7A-B	na
YFA1315	BY GPD1-GFP swapA-BY c1	built	BY	YFA1240	leu2Δ0 his3∆1 ura3∆0 met15∆0 YDL022W-GFP-HIS3MX chrX-146490:149965-BY	1n	a	7C-D-F	na
YFA1316	BY GPD1-GFP swapA-BY c2	built	BY	YFA1240	leu2Δ0 his3∆1 ura3∆0 met15∆0 YDL022W-GFP-HIS3MX chrX-146490:149965-BY	1n	a	7C-D-F	na
YFA1317	BY GPD1-GFP swapA-BY c3	built	BY	YFA1240	leu2Δ0 his3∆1 ura3∆0 met15∆0 YDL022W-GFP-HIS3MX chrX-146490:149965-BY	1n	a	7C-D-F	na
YFA1318	BY GPD1-GFP swapA-BY c4	built	BY	YFA1240	leu2Δ0 his3∆1 ura3∆0 met15∆0 YDL022W-GFP-HIS3MX chrX-146490:149965-BY	1n	a	7C-D-F	na
YFA1319	BY GPD1-GFP swapA-BY c5	built	BY	YFA1240	leu2Δ0 his3∆1 ura3∆0 met15∆0 YDL022W-GFP-HIS3MX chrX-146490:149965-BY	1n	a	7C-D-F	na
YFA1320	BY GPD1-GFP swapA-BY c6	built	BY	YFA1240	leu2Δ0 his3∆1 ura3∆0 met15∆0 YDL022W-GFP-HIS3MX chrX-146490:149965-BY	1n	a	7C-D-F	na
YFA1321	BY GPD1-GFP swapA-BY c7	built	BY	YFA1240	leu2Δ0 his3∆1 ura3∆0 met15∆0 YDL022W-GFP-HIS3MX chrX-146490:149965-BY	1n	a	7C-D-F	na
YFA1322	BY GPD1-GFP swapA-BY c8	built	BY	YFA1240	leu2Δ0 his3∆1 ura3∆0 met15∆0 YDL022W-GFP-HIS3MX chrX-146490:149965-BY	1n	a	7C-D-F	na
YFA1323	BY GPD1-GFP swapA-BY-GPD1-GFP c1	built	BY	YFA1240	leu2Δ0 his3∆1 ura3∆0 met15∆0 YDL022W-GFP-HIS3MX chrX-146490:149965-BY.GG	1n	a	7C-D-F	na
YFA1324	BY GPD1-GFP swapA-BY-GPD1-GFP c2	built	BY	YFA1240	leu2Δ0 his3∆1 ura3∆0 met15∆0 YDL022W-GFP-HIS3MX chrX-146490:149965-BY.GG	1n	a	7C-D-F	na
YFA1325	BY GPD1-GFP swapA-BY-GPD1-GFP c3	built	BY	YFA1240	leu2Δ0 his3∆1 ura3∆0 met15∆0 YDL022W-GFP-HIS3MX chrX-146490:149965-BY.GG	1n	a	7C-D-F	na
YFA1326	BY GPD1-GFP swapA-BY-GPD1-GFP c4	built	BY	YFA1240	leu2Δ0 his3∆1 ura3∆0 met15∆0 YDL022W-GFP-HIS3MX chrX-146490:149965-BY.GG	1n	a	7C-D-F	na
YFA1327	BY GPD1-GFP swapA-BY-GPD1-GFP c5	built	BY	YFA1240	leu2Δ0 his3∆1 ura3∆0 met15∆0 YDL022W-GFP-HIS3MX chrX-146490:149965-BY.GG	1n	a	7C-D-F	na
YFA1328	BY GPD1-GFP swapA-BY-GPD1-GFP c6	built	BY	YFA1240	leu2Δ0 his3∆1 ura3∆0 met15∆0 YDL022W-GFP-HIS3MX chrX-146490:149965-BY.GG	1n	a	7C-D-F	na
YFA1329	BY GPD1-GFP swapA-BY-GPD1-GFP c7	built	BY	YFA1240	leu2Δ0 his3∆1 ura3∆0 met15∆0 YDL022W-GFP-HIS3MX chrX-146490:149965-BY.GG	1n	a	7C-D-F	na
YFA1330	BY GPD1-GFP swapA-BY-GPD1-GFP c8	built	BY	YFA1240	leu2Δ0 his3∆1 ura3∆0 met15∆0 YDL022W-GFP-HIS3MX chrX-146490:149965-BY.GG	1n	a	7C-D-F	na
YPFA-ChB2-A1	BY GPD1-GFP-gRNA CRISPR reporter c1	built	BY	YFA1375	his3∆1 leu2∆0 met15∆0 ura3∆0 YDL022W-GFP-gRNAc3-LEU2 npr2Δ::pdCAS9-KanMX-mCherry	1n	a	7F, S15	na
YPFA-ChB2-B1	BY GPD1-GFP-gRNA CRISPR reporter c2	built	BY	YFA1375	his3∆1 leu2∆0 met15∆0 ura3∆0 YDL022W-GFP-gRNAc3-LEU2 npr2Δ::pdCAS9-KanMX-mCherry	1n	a	7F	na
YPFA-ChB2-C1	BY GPD1-GFP-gRNA CRISPR reporter c3	built	BY	YFA1375	his3∆1 leu2∆0 met15∆0 ura3∆0 YDL022W-GFP-gRNAc3-LEU2 npr2Δ::pdCAS9-KanMX-mCherry	1n	a	7F	na
YPFA-ChB2-D1	BY GPD1-GFP-gRNA CRISPR reporter c4	built	BY	YFA1375	his3∆1 leu2∆0 met15∆0 ura3∆0 YDL022W-GFP-gRNAc3-LEU2 npr2Δ::pdCAS9-KanMX-mCherry	1n	a	7F	na
YPFA-ChB2-E1	BY GPD1-GFP-gRNA CRISPR reporter c5	built	BY	YFA1375	his3∆1 leu2∆0 met15∆0 ura3∆0 YDL022W-GFP-gRNAc3-LEU2 npr2Δ::pdCAS9-KanMX-mCherry	1n	a	7F	na
YPFA-ChB2-F1	BY GPD1-GFP-gRNA CRISPR reporter c6	built	BY	YFA1375	his3∆1 leu2∆0 met15∆0 ura3∆0 YDL022W-GFP-gRNAc3-LEU2 npr2Δ::pdCAS9-KanMX-mCherry	1n	a	7F	na
YPFA-ChB2-G1	BY GPD1-GFP-gRNA CRISPR reporter c7	built	BY	YFA1375	his3∆1 leu2∆0 met15∆0 ura3∆0 YDL022W-GFP-gRNAc3-LEU2 npr2Δ::pdCAS9-KanMX-mCherry	1n	a	7F	na
YPFA-ChB2-H1	BY GPD1-GFP-gRNA CRISPR reporter c8	built	BY	YFA1375	his3∆1 leu2∆0 met15∆0 ura3∆0 YDL022W-GFP-gRNAc3-LEU2 npr2Δ::pdCAS9-KanMX-mCherry	1n	a	7F	na
YPFA-ChB2-A2	BY GPD1-GFP-gRNA yak1∆ CRISPR reporter c1	built	BY	YFA1377	his3∆1 leu2∆0 met15∆0 ura3∆0 YDL022W-GFP-gRNAc3-LEU2 npr2Δ::pdCAS9-KanMX-mCherry YJL141C::hphMX	1n	a	7F, S15	na
YPFA-ChB2-B2	BY GPD1-GFP-gRNA yak1∆ CRISPR reporter c2	built	BY	YFA1377	his3∆1 leu2∆0 met15∆0 ura3∆0 YDL022W-GFP-gRNAc3-LEU2 npr2Δ::pdCAS9-KanMX-mCherry YJL141C::hphMX	1n	a	7F	na
YPFA-ChB2-C2	BY GPD1-GFP-gRNA yak1∆ CRISPR reporter c3	built	BY	YFA1377	his3∆1 leu2∆0 met15∆0 ura3∆0 YDL022W-GFP-gRNAc3-LEU2 npr2Δ::pdCAS9-KanMX-mCherry YJL141C::hphMX	1n	a	7F	na
YPFA-ChB2-D2	BY GPD1-GFP-gRNA yak1∆ CRISPR reporter c4	built	BY	YFA1377	his3∆1 leu2∆0 met15∆0 ura3∆0 YDL022W-GFP-gRNAc3-LEU2 npr2Δ::pdCAS9-KanMX-mCherry YJL141C::hphMX	1n	a	7F	na
YPFA-ChB2-E2	BY GPD1-GFP-gRNA yak1∆ CRISPR reporter c5	built	BY	YFA1377	his3∆1 leu2∆0 met15∆0 ura3∆0 YDL022W-GFP-gRNAc3-LEU2 npr2Δ::pdCAS9-KanMX-mCherry YJL141C::hphMX	1n	a	7F	na
YPFA-ChB2-F2	BY GPD1-GFP-gRNA yak1∆ CRISPR reporter c6	built	BY	YFA1377	his3∆1 leu2∆0 met15∆0 ura3∆0 YDL022W-GFP-gRNAc3-LEU2 npr2Δ::pdCAS9-KanMX-mCherry YJL141C::hphMX	1n	a	7F	na
YPFA-ChB2-G2	BY GPD1-GFP-gRNA yak1∆ CRISPR reporter c7	built	BY	YFA1377	his3∆1 leu2∆0 met15∆0 ura3∆0 YDL022W-GFP-gRNAc3-LEU2 npr2Δ::pdCAS9-KanMX-mCherry YJL141C::hphMX	1n	a	7F	na
YPFA-ChB2-H2	BY GPD1-GFP-gRNA yak1∆ CRISPR reporter c8	built	BY	YFA1377	his3∆1 leu2∆0 met15∆0 ura3∆0 YDL022W-GFP-gRNAc3-LEU2 npr2Δ::pdCAS9-KanMX-mCherry YJL141C::hphMX	1n	a	7F	na
YFA1383	BY YAK1wt c1	built	BY	YFA1371	his3∆1 leu2∆0 met15∆0 ura3∆0 YJL141C-587Q	1n	a	8, S14	na
YFA1384	BY YAK1wt c2	built	BY	YFA1371	his3∆1 leu2∆0 met15∆0 ura3∆0 YJL141C-587Q	1n	a	8, S14	na
YFA1385	BY YAK1wt c3	built	BY	YFA1371	his3∆1 leu2∆0 met15∆0 ura3∆0 YJL141C-587Q	1n	a	8, S14	na
YFA1386	BY YAK1wt c4	built	BY	YFA1371	his3∆1 leu2∆0 met15∆0 ura3∆0 YJL141C-587Q	1n	a	8, S14	na
YFA1387	BY YAK1wt c5	built	BY	YFA1371	his3∆1 leu2∆0 met15∆0 ura3∆0 YJL141C-587Q	1n	a	8, S14	na
YFA1388	BY YAK1-Q587* c1	built	BY	YFA1371	his3∆1 leu2∆0 met15∆0 ura3∆0 YJL141C-587stop	1n	a	8, S14, S15	na
YFA1389	BY YAK1-Q587* c2	built	BY	YFA1371	his3∆1 leu2∆0 met15∆0 ura3∆0 YJL141C-587stop	1n	a	8, S14	na
YFA1390	BY YAK1-Q587* c3	built	BY	YFA1371	his3∆1 leu2∆0 met15∆0 ura3∆0 YJL141C-587stop	1n	a	8, S14	na
YFA1391	BY YAK1-Q587* c4	built	BY	YFA1371	his3∆1 leu2∆0 met15∆0 ura3∆0 YJL141C-587stop	1n	a	8, S14	na
YFA1392	BY YAK1-Q587* c5	built	BY	YFA1371	his3∆1 leu2∆0 met15∆0 ura3∆0 YJL141C-587stop	1n	a	8, S14	na
YFA0118	BY FAA4-GFP c1	acquired from GFP collection, Kruglyak lab, UCLA	BY		his3∆1 leu2∆0 met15∆0 ura3∆0 YMR246W-GFP-HIS3MX	1n	a		YAK1 allele testing
YFA0424	BY YMR315W-GFP c1	acquired from GFP collection, Kruglyak lab, UCLA	BY		his3∆1 leu2∆0 met15∆0 ura3∆0 YMR315W-GFP-HIS3MX	1n	a		YAK1 allele testing
Plate 3GS2 – A1	BY PGM1-TAP	from TAP collection, Albert lab	BY		his3∆1 leu2∆0 met15∆0 ura3∆0 YKL127W-TAP-HIS3MX	1n	a		YAK1 allele testing
Plate 3GS2 – B2	BY NOT5-TAP	from TAP collection, Albert lab	BY		his3∆1 leu2∆0 met15∆0 ura3∆0 YPR072W-TAP-HIS3MX	1n	a		YAK1 allele testing
Plate 3GS2 – G11	BY EMI2-TAP	from TAP collection, Albert lab	BY		his3∆1 leu2∆0 met15∆0 ura3∆0 YDR516C-TAP-HIS3MX	1n	a		YAK1 allele testing
Plate 3GS2 – H12	BY TUB1-TAP	from TAP collection, Albert lab	BY		his3∆1 leu2∆0 met15∆0 ura3∆0 YML085C-TAP-HIS3MX	1n	a		YAK1 allele testing
