# Supplementary material for: Simultaneous quantification of mRNA and protein in single cells reveals post-transcriptional effects of genetic variation
Source: eLife journal article supplement (doi:10.7554/elife.60645), 2020-11-16
Supplement: supp [file elife-60645-supp-v1.zip › elife_poa_e60645_Supplementary_file_3.xlsx]

## Sheet: Sheet1
Table S3: List of PCR primers and DNA fragments
Name	active site description	active site sequence	3p-overhang description	3p-overhang sequence	final primer sequence	size	paired primer	product size	used to	template DNA	final plasmid/strains
	build plasmid Z3EV step 1 (without terminator) BFA0024
PFA0016	pACT1_f	CGCGCCGCCTCTACCTTG	AatII-PMN9	gcgctgctctcgtcgatccgacgtc	gcgctgctctcgtcgatccgacgtcCGCGCCGCCTCTACCTTG	43	PFA0017	2065	build plasmid Z3EV step 1 (without terminator)	YFA0001	BFA0024
PFA0017	Z3EV_r	CTACCCACCGTACTCGTCA	NatMXTer	gtcgctatactgc	gtcgctatactgcCTACCCACCGTACTCGTCA	32	PFA0016	2065	build plasmid Z3EV step 1 (without terminator)	YFA0001	BFA0024
PFA0018	NATter_f	gcagtatagcgaccagcat	Z3EV	GTACGGTGGGTAG	GTACGGTGGGTAGgcagtatagcgaccagcat	32	PFA0019	1075	build plasmid Z3EV step 1 (without terminator)	BFA0001	BFA0024
PFA0019	NATpro_r	CGACATGGAGGCCCAGAAT	HDVrib	ACATGCTTCGGCATGGCGAATGGGAC	ACATGCTTCGGCATGGCGAATGGGACCGACATGGAGGCCCAGAAT	45	PFA0018	1075	build plasmid Z3EV step 1 (without terminator)	BFA0001	BFA0024
long ds-fragment synthesis	geneBlok_Hh-C3gRNA-HDV				AATGTACCTGATGAGTCCGTGAGGACGAAACGAGTAAGCTCGTCGTACATACAGTAGGATCCTAGTTTTAGAGCTAGAAATAGCAAGTTAAAATAAGGCTAGTCCGTTATCAACTTGAAAAAGTGGCACCGAGTCGGTGCTTTTGGCCGGCATGGTCCCAGCCTCCTCGCTGGCGCCGGCTGGGCAACATGCTTCGGCATGGCGAATGGGAC	212	na	212	build plasmid Z3EV step 1 (without terminator)	na	BFA0024
OFA0038	A3-GFP-r	CTATTTGTATAGTTCATCCATGCC	polyAHammer	ACGGACTCATCAGGTACATTTTTTTTTTTTTTTTTTTTTTTTTTTTTTTTTTTTTTTTT	ACGGACTCATCAGGTACATTTTTTTTTTTTTTTTTTTTTTTTTTTTTTTTTTTTTTTTTCTATTTGTATAGTTCATCCATGCC	83	PFA0021	820	build plasmid Z3EV step 1 (without terminator)	YFA0013	BFA0024
PFA0021	GFPstart_r	agtaaaggagaagaacttttcact	ATG-KpnI-PMN9	tcaaggagaaaaaactataggtaccATGGTG	tcaaggagaaaaaactataggtaccATGGTGagtaaaggagaagaacttttcact	55	OFA0038	820	build plasmid Z3EV step 1 (without terminator)	YFA0013	BFA0024
Restriction enzyme degestion	AatII, KpnI	na	na	na	na	na	na	5158	build plasmid Z3EV step 1 (without terminator)	BFA0012	BFA0024
	build plasmid Z3EV step2 (with terminator) BFA0029
OFA0080	AmpORI_f	gacgtcaggtggcacttttc	Z3EVgRNAi-r	tttagcttgcctc	tttagcttgcctcgacgtcaggtggcacttttc	33	OFA0081	1861	build plasmid Z3EV step2 (with terminator)	BFA0024	BFA0029
OFA0081	AmpORI_r	ggtaatacggttatccacagaatc	pACT1_f	TAGAGGCGGCGCG	TAGAGGCGGCGCGggtaatacggttatccacagaatc	37	OFA0080	1861	build plasmid Z3EV step2 (with terminator)	BFA0024	BFA0029
OFA0082	pACT1_f	CGCGCCGCCTCTACCTTG	AmpORI_r	taaccgtattacc	taaccgtattaccCGCGCCGCCTCTACCTTG	31	OFA0083	3187	build plasmid Z3EV step2 (with terminator)	BFA0024	BFA0029
OFA0083	NATpro_r	CGACATGGAGGCCCAGAAT	CYCter_end_f	ttaatttgcggcc	ttaatttgcggccCGACATGGAGGCCCAGAAT	32	OFA0082	3187	build plasmid Z3EV step2 (with terminator)	BFA0024	BFA0029
OFA0084	CYCter_end_f	ggccgcaaattaaagccttc	NATpro_r	GGCCTCCATGTCG	GGCCTCCATGTCGggccgcaaattaaagccttc	33	OFA0085	266	build plasmid Z3EV step2 (with terminator)	BFA0008	BFA0029
OFA0085	CYCter_sta_r	cctaggaactcgagtcatgtaa	HDVrib_end_f	aatgggacactga	aatgggacactgacctaggaactcgagtcatgtaa	35	OFA0084	266	build plasmid Z3EV step2 (with terminator)	BFA0008	BFA0029
OFA0086	HDVrib_end_f	tcagtgtcccattcgccat	CYCter_sta_r	tcgagttcctagg	tcgagttcctaggtcagtgtcccattcgccat	32	OFA0087	1705	build plasmid Z3EV step2 (with terminator)	BFA0024	BFA0029
OFA0087	Z3EVgRNAi-r	gaggcaagctaaacagatc	AmpORI_f	gccacctgacgtc	gccacctgacgtcgaggcaagctaaacagatc	32	OFA0086	1705	build plasmid Z3EV step2 (with terminator)	BFA0024	BFA0029
	build plasmid tag (LEU2) step3 BFA0078
OFA0357	LEU2pro_f	gttaactgtgggaatactcagg	CYCter_end_Bpu10I_r	ttgacagtcttgacgtgcgcagctcagg	ttgacagtcttgacgtgcgcagctcagggttaactgtgggaatactcagg	50	OFA0358	1725	build plasmid tag (LEU2) step3	YFA0005	BFA0078
OFA0358	LEU2ter_r	ttccttatcacgttgagcc	TEFp_Bpu10I_f	gggcgacagtcacatcatgcccctgagc	gggcgacagtcacatcatgcccctgagcttccttatcacgttgagcc	47	OFA0357	1725	build plasmid tag (LEU2) step3	YFA0005	BFA0078
Restriction enzyme digestion	Bpu10I	na	na	na	na	na	na	7019	build plasmid tag (LEU2) step3	BFA0029	BFA0078
	build plasmid CRISPR reporter step1 - BFA0023
PFA0030	pACT1bc_f	TGTTAATTCAGTAAATTTTCGATCTT	BAMHI_dCAS9	ctagacattcttttaatcgtggatcc	ctagacattcttttaatcgtggatccTGTTAATTCAGTAAATTTTCGATCTT	52	PFA0031	667	build plasmid CRISPR reporter step1	YFA0001	BFA0023
PFA0031	pACT1fr_r	CGCGCCGCCTCTACCTTG	mCherrystop_f	tgagcggccgcca	tgagcggccgccaCGCGCCGCCTCTACCTTG	31	PFA0030	667	build plasmid CRISPR reporter step1	YFA0001	BFA0023
PFA0022	mCherrystop_f	tggcggccgctcacttgta	pACT1_front	TAGAGGCGGCGCG	TAGAGGCGGCGCGtggcggccgctcacttgta	32	PFA0023	721	build plasmid CRISPR reporter step1	BFA0006	BFA0023
PFA0023	mCherrystart_r	atggtgagcaagggcgag	pCYCm_back	agatattaaaatg	agatattaaaatgatggtgagcaagggcgag	31	PFA0022	721	build plasmid CRISPR reporter step1	BFA0006	BFA0023
PFA0024	pCYCmbc_f	cattttaatatctagattagtgtgtg	mCherry-start	ccttgctcaccat	ccttgctcaccatcattttaatatctagattagtgtgtg	39	PFA0025	212	build plasmid CRISPR reporter step1	BFA0007	BFA0023
PFA0025	pCYCmfr_r	AAGCTTGATATCGAATTCCTGC	NPR2start_f	AATAGCTTAGCAT	AATAGCTTAGCATAAGCTTGATATCGAATTCCTGC	35	PFA0024	212	build plasmid CRISPR reporter step1	BFA0007	BFA0023
PFA0026	NPR2start_f	ATGCTAAGCTATTTCCAAGGG	pCYCm_front	CGATATCAAGCTT	CGATATCAAGCTTATGCTAAGCTATTTCCAAGGG	34	PFA0027	1827	build plasmid CRISPR reporter step1	YFA0005	BFA0023
PFA0027	NPR2stop_r	TTCTCCTAATTCGTTTAGGTAGC	KANpro	agatccactagtg	agatccactagtgTTCTCCTAATTCGTTTAGGTAGC	36	PFA0026	1827	build plasmid CRISPR reporter step1	YFA0005	BFA0023
PFA0028	KANpro_f	cactagtggatctgatatcacct	NPR2stop_r	CGAATTAGGAGAA	CGAATTAGGAGAAcactagtggatctgatatcacct	36	PFA0029	1585	build plasmid CRISPR reporter step1	BFA0003	BFA0023
PFA0029	KANter_r	gagcgtcgacaacccttaa	AatII_dCAS9	ttccccgaaaagtgccacctgacgtc	ttccccgaaaagtgccacctgacgtcgagcgtcgacaacccttaa	45	PFA0028	1585	build plasmid CRISPR reporter step1	BFA0003	BFA0023
Restriction enzyme digestion	BamHI, AatII	na	na	na	na	na	na	6828	build plasmid tag (LEU2) step3	BFA0008	BFA0023
	build plasmid CRISPR reporter step2 - BFA0031
OFA0100	R2-m_f	ggatccaaccatgatgagta	pCAS-ECOR5pcyc	cagtacccgggctgcaggaattcgat	cagtacccgggctgcaggaattcgatggatccaaccatgatgagta	46	OFA0101	1054	build plasmid CRISPR reporter step2	YFA0005	BFA0031
OFA0101	R2-e_r	TTCTCCTAATTCGTTTAGGTAGC	NP-s-SWAI	CCCTTGGAAATAGCTTAGCATTTAAA	CCCTTGGAAATAGCTTAGCATTTAAATTCTCCTAATTCGTTTAGGTAGC	49	OFA0100	1054	build plasmid CRISPR reporter step2	YFA0005	BFA0031
OFA0102	NP-s_f	ATGCTAAGCTATTTCCAAGGG	R2-e-SWAI	GCTACCTAAACGAATTAGGAGAATTTAA	GCTACCTAAACGAATTAGGAGAATTTAAATGCTAAGCTATTTCCAAGGG	49	OFA0103	753	build plasmid CRISPR reporter step2	YFA0005	BFA0031
OFA0103	NP-m_r	caaatttacagacgacaggg	pCAS-ECOR5ttef	tatgctatacgaagttattaggtgat	tatgctatacgaagttattaggtgatcaaatttacagacgacaggg	46	OFA0102	753	build plasmid CRISPR reporter step2	YFA0005	BFA0031
Restriction enzyme digestion	EcoRV	na	na	na	na	na	na	9990	build plasmid CRISPR reporter step2	BFA0023	BFA0031
	build plasmid ACT1pr-mCherry step3 – BFA0093
OFA0347	pACT1_f2	ctaaataagtaaataagacacacgc	pACT1frontNot1	ggtagaggcggcgcgtggcggccgc	ggtagaggcggcgcgtggcggccgcctaaataagtaaataagacacacgc	50	OFA0353	667	build plasmid ACT1pr-mCherry step3	BFA0031	BFA0093
OFA0353	pACT1_2r	TGTTAATTCAGTAAATTTTCGATCTT	gRNAtarge2R	accataggatcctactgtatgtacg	accataggatcctactgtatgtacgTGTTAATTCAGTAAATTTTCGATCTT	51	OFA0347	667	build plasmid ACT1pr-mCherry step3	BFA0031	BFA0093
OFA0354	mCherry_2f	atggtgagcaagggcgag	gRNAtarge2F	taacacgtacatacagtaggatcct	taacacgtacatacagtaggatcctatggtgagcaagggcgag	43	OFA0350	771	build plasmid ACT1pr-mCherry step3	BFA0031	BFA0093
OFA0350	mCherry_r	tggcggccgctcacttgta	R2-s-EcoRI	catcatggttggatccatcgaattc	catcatggttggatccatcgaattctggcggccgctcacttgta	44	OFA0354	771	build plasmid ACT1pr-mCherry step3	BFA0031	BFA0093
Restriction enzyme digestion	Not1, EcoRI	na	na	na	na	na	na	10887	build plasmid CRISPR reporter step2	BFA0031	BFA0093
	Inserting HIS3 back in RM strain (YFA0033 )
OFA0044	HIS3i_f	CAGTCCTTTCCCGCAATTTTC			CAGTCCTTTCCCGCAATTTTC	21	OFA0045	1188	insert for HIS3 replacement	YFA0005	YFA0033
OFA0045	HIS3i_r	GCTTTTCTTGTTGTTCTTACGG			GCTTTTCTTGTTGTTCTTACGG	22	OFA0044	1188	insert for HIS3 replacement	YFA0005	YFA0033
	control of insertion of CRISPR reproter in NPR2
OFA0050	NPR2v-f	CATAATGGGCCCTCTATCAC			CATAATGGGCCCTCTATCAC	20	OFA0051,PFA0029	2089, 2477	control of insertion of CRISPR reproter in NPR2	YFA0196,YFA0198,YFA0508	YFA0196,YFA0198,YFA0508
OFA0051	NPR2v-r	ACGTTTGGATTCGTGTGTAC			ACGTTTGGATTCGTGTGTAC	20	OFA0050	2089	control of insertion of CRISPR reproter in NPR2	YFA0196,YFA0198,YFA0508	YFA0196,YFA0198,YFA0508
	tagging gene with GFP-gRNA (build insert DNA)
OFA0046	gRNAi_GFP_f	gtcagtggagagggtgaag			gtcagtggagagggtgaag	19	OFA0056,OFA0363	2300,2928	insert of the tag for GFP tagged genes	BFA0029,BFA0078	YFA0215,YFA0205,YFA0458,YFA0496,YFA0462,YFA0478,YFA0476
OFA0056	gRNAi_r2	TGACGAGTACGGTGGGTAG	TEFTend	ttattgtcagtacttcacatcaaaacacctttggttgagg	ttattgtcagtacttcacatcaaaacacctttggttgaggTGACGAGTACGGTGGGTAG	59	OFA0046	2300	insert of the tag for GFP tagged genes (NatMX)	BFA0029	YFA0215,YFA0205
OFA0363	LEU2ter_t	ttccttatcacgttgagcc	TEFTend	ttattgtcagtacttcacatcaaaacacctttggttgagg	ttattgtcagtacttcacatcaaaacacctttggttgaggttccttatcacgttgagcc	59	OFA0046	2928	insert of the tag for GFP tagged genes (LEU2)	BFA0078	YFA0458,YFA0496,YFA0462,YFA0478,YFA0476
	tagging gene with GFP-gRNA (control transformation)
OFA0060	In-gRNAv-r	caagttgataacggactagcc			caagttgataacggactagcc	21	OFA0370,OFA0371,OFA0372,OFA0373	874	control insertion tag	YFA0215,YFA0205,YFA0458,YFA0496,YFA0462,YFA0478,YFA0476	YFA0215,YFA0205,YFA0458,YFA0496,YFA0462,YFA0478,YFA0476
OFA0090	In-gRNAv-f	ggctagtccgttatcaacttg			ggctagtccgttatcaacttg	21	OFA0391	2156	control insertion tag	YFA0478	YFA0478
OFA0104	tADH_f	ctcaggtatagtatgaggtcg			ctcaggtatagtatgaggtcg	21	OFA0391	1364	control negatif (no insertion of the tag)	YFA0478	YFA0478
OFA0370	BMH2-cF	TCCCTTCTGCTACTACTGGTGAG			TCCCTTCTGCTACTACTGGTGAG	23	OFA0060	874	control insertion in BMH2	YFA0462	YFA0462
OFA0371	UGP1-cF	ATCGAGCAATTTGGAGATGG			ATCGAGCAATTTGGAGATGG	20	OFA0060	874	control insertion in UGP1	YFA0476	YFA0476
OFA0372	MTD1-cF	CCATTCTACCTTGCACACCAC			CCATTCTACCTTGCACACCAC	21	OFA0060	874	control insertion in MTD1	YFA0478	YFA0478
OFA0373	ARO8-cF	TGAAATGACGATTCAAGCCC			TGAAATGACGATTCAAGCCC	20	OFA0060	874	control insertion in ARO8	YFA0496	YFA0496
OFA0391	MTD1-cR	TGCCACTGATATTGAGCCC			TGCCACTGATATTGAGCCC	19	OFA0090,OFA0104	2156,1364	control insertion in MTD1	YFA0478	YFA0478
	Sanger sequencing: control tag sequence and polyA-tail
OFA0140	CS-HDVrib_end_f	gtcccattcgccatgcc			gtcccattcgccatgcc	17	OFA0141	285	Sanger sequencing control	BFA0029,BFA0078	BFA0029,BFA0078
OFA0141	CS-GFPend_r	cacatggcatggatgaactatac			cacatggcatggatgaactatac	23	OFA0140,OFA0144,OFA0145	285.335.588	Sanger sequencing control	BFA0029,BFA0078	BFA0029,BFA0078
OFA0144	CS-CYCter_f	aagggcgtgaatgtaagcg			aagggcgtgaatgtaagcg	19	OFA0141	335	Sanger sequencing control	BFA0029,BFA0078	BFA0029,BFA0078
OFA0145	CS-TEFpro_f	gtcaagactgtcaaggaggg			gtcaagactgtcaaggaggg	20	OFA0141	588	Sanger sequencing control	BFA0029,BFA0078	BFA0029,BFA0078
	insert Z3EV-pZ3EV-GFP-gRNA in TRP1 (build insert)
OFA0217	T-Z3EVgRNAi2-f	CGCGCCGCCTCTACCTTG	TRP-Front	CTATTGAGCACGTGAGTATACGTGATTAAGCACACAAAGGCAGCTTGGAGTATGTCTGTTATTAATTTC	CTATTGAGCACGTGAGTATACGTGATTAAGCACACAAAGGCAGCTTGGAGTATGTCTGTTATTAATTTCCGCGCCGCCTCTACCTTG	87	OFA0218	5157	insert Z3EV in TRP1	BFA0029	YFA0283,YFA0285
OFA0218	T-Z3EVgRNAi2-r	gaggcaagctaaacagatc	TRP-End	AAAGGCCTGCAGGCAAGTGCACAAACAATACTTAAATAAATACTACTCAGTAATAACCTATTTCTTAGC	AAAGGCCTGCAGGCAAGTGCACAAACAATACTTAAATAAATACTACTCAGTAATAACCTATTTCTTAGCgaggcaagctaaacagatc	88	OFA0217	5157	insert Z3EV in TRP1	BFA0029	YFA0283,YFA0285
OFA0464	T-Z3EVgRNAi-f2	CGCGCCGCCTCTACCTTG	TRP-Front	ACTATTGAGCACGTGAGTATACGTGATTAAGCACACAAAGGCAGCTTGGAGTATGTCTGTTATTAATTTC	ACTATTGAGCACGTGAGTATACGTGATTAAGCACACAAAGGCAGCTTGGAGTATGTCTGTTATTAATTTCCGCGCCGCCTCTACCTTG	88	OFA0465	5157	insert Z3EV in TRP1	BFA0029	YFA0283,YFA0285
OFA0465	T-Z3EVgRNAi-r2	gaggcaagctaaacagatc	TRP-End	GCTTGCTTTTCAAAAGGCCTGCAGGCAAGTGCACAAACAATACTTAAATAAATACTACTCAGTAATAACC	GCTTGCTTTTCAAAAGGCCTGCAGGCAAGTGCACAAACAATACTTAAATAAATACTACTCAGTAATAACCgaggcaagctaaacagatc	89	OFA0464	5157	insert Z3EV in TRP1	BFA0029	YFA0283,YFA0285
	insert Z3EV-pZ3EV-GFP-gRNA in TRP1 (control transformant)
OFA0201	TRP1ext-F	ACTTTGCAGTTATGACGCC			ACTTTGCAGTTATGACGCC	19	OFA0202,PFA0030	456900	control insertion in TRP1	YFA0283,YFA0285	YFA0283,YFA0285
OFA0202	TRP1int-R	GTTGATTACGAAACACGCC			GTTGATTACGAAACACGCC	19	OFA0201	456	control insertion in TRP1	YFA0283,YFA0285	YFA0283,YFA0285
	build plasmid mCherry replicative (BFA-ChB1,BFA-ChB2 (not stored))
OFA0237	pCYCm-pRS425-f	atcgaattcctgcagccc	pRS425-SalIf	ttgggtaccgggccccccctcgagg	ttgggtaccgggccccccctcgaggatcgaattcctgcagccc	43	OFA0238	924	build plasmid mCherry replicative	BFA0031	BFA-ChB1,BFA-ChB2 (not stored)
OFA0238	mCherry-pRS425-r	tggcggccgctcacttgta	pRS425-BamHIr	ggtggcggccgctctagaactagtg	ggtggcggccgctctagaactagtgtggcggccgctcacttgta	44	OFA0237	924	build plasmid mCherry replicative	BFA0031	BFA-ChB1,BFA-ChB2 (not stored)
Restriction enzyme digestion	SalI, BamHI	na	na	na	na	na	na	5976,6804	build plasmid mCherry replicative	BFA0068,BFA0069	BFA-ChB1,BFA-ChB2 (not stored)
	build plasmid dCAS9 replicative step1 (no yeast ORI) (BFA-ChB3 (not stored) )
OFA0288	pACT1fr2_r	CGCGCCGCCTCTACCTTG	Trp-ter-SacI	ctctggcgaagaattgttaattaagagctc	ctctggcgaagaattgttaattaagagctcCGCGCCGCCTCTACCTTG	48	PFA0030	667	build plasmid dCAS9 replicative step1 (no yeast ORI)	BFA0031	BFA-ChB3 (not stored)
Restriction enzyme digestion	SacI, BamHI	na	na	na	na	na	na	8981	build plasmid dCAS9 replicative step1 (no yeast ORI)	BFA0008	BFA-ChB3 (not stored)
	build plasmid dCAS9 replicative 2µ & CEN step2 (BFA0075,BFA0076)
OFA0295	rep2uFf	cacctgaacgaagcatctgtg	Trp-ter-SacI	ggcgaagaattgttaattaagagct	ggcgaagaattgttaattaagagctcacctgaacgaagcatctgtg	46	OFA0296	1414	build plasmid dCAS9 replicative 2µ step2	BFA0069	BFA0075
OFA0296	rep2uBr	gaaagggcctcgtgatacg	pACT1front	gcaaggtagaggcggcgcggagctc	gcaaggtagaggcggcgcggagctcgaaagggcctcgtgatacg	44	OFA0295	1414	build plasmid dCAS9 replicative 2µ step2	BFA0069	BFA0075
OFA0297	repCENFf	cacctgggtccttttcatcac	Trp-ter-SacI	ggcgaagaattgttaattaagagct	ggcgaagaattgttaattaagagctcacctgggtccttttcatcac	46	OFA0298	524	build plasmid dCAS9 replicative CEN step2	BFA0068	BFA0076
OFA0298	repCENBr	gacggatcgcttgcctgtaac	pACT1front	gcaaggtagaggcggcgcggagctc	gcaaggtagaggcggcgcggagctcgacggatcgcttgcctgtaac	46	OFA0297	524	build plasmid dCAS9 replicative CEN step2	BFA0068	BFA0076
Restriction enzyme digestion	SacI	na	na	na	na	na	na	9648	build plasmid dCAS9 replicative CEN step2	BFA-ChB3 (not stored)	BFA0075,BFA0076
	tagging gene with GFP-gRNA (not form GFP collection) (build insert DNA)
OFA0678	GFPstart_f	atggtgagtaaaggagaag	OLE1_seqEND	TAGTAAGAGAGGTGAAATCTACGAAACTGGTAAGTTCTTT	TAGTAAGAGAGGTGAAATCTACGAAACTGGTAAGTTCTTTatggtgagtaaaggagaag	59	OFA0684	3014	insert gRNA tag in OLE1	BFA0078	YFA1002
OFA0679	GFPstart_f	atggtgagtaaaggagaag	CYC1_seqEND	CAGAAACGACTTAATTACCTACTTGAAAAAAGCCTGTGAG	CAGAAACGACTTAATTACCTACTTGAAAAAAGCCTGTGAGatggtgagtaaaggagaag	59	OFA0685	3014	insert gRNA tag in CYC1	BFA0078	YFA1003
OFA0680	GFPstart_f	atggtgagtaaaggagaag	TPO1_seqEND	TGAATCTATCAGAAAGAAATCCAAGTATGCTTACGCCGCT	TGAATCTATCAGAAAGAAATCCAAGTATGCTTACGCCGCTatggtgagtaaaggagaag	59	OFA0686	3014	insert gRNA tag in TPO1	BFA0078	YFA1004
OFA0681	GFPstart_f	atggtgagtaaaggagaag	CTS1_seqEND	TACCCAATGTAATTTCTCTTATTTGGAAAGCAATTACTTT	TACCCAATGTAATTTCTCTTATTTGGAAAGCAATTACTTTatggtgagtaaaggagaag	59	OFA0687	3014	insert gRNA tag in CTS1	BFA0078	YFA1005
OFA0683	GFPstart_f	atggtgagtaaaggagaag	RPS10A_seqEND	TCAAGAAAGAAACCCAACTCAAAGACCACAAAGAAGATAT	TCAAGAAAGAAACCCAACTCAAAGACCACAAAGAAGATATatggtgagtaaaggagaag	59	OFA0689	3014	insert gRNA tag in RPS10A	BFA0078	YFA1007
OFA0684	LEUter_r	TTCCTTATCACGTTGAGCC	OLE1_100term	CGTAATAAGAGAAAAAAAAAGGAAAAATGTCAAAACGTAA	CGTAATAAGAGAAAAAAAAAGGAAAAATGTCAAAACGTAATTCCTTATCACGTTGAGCC	59	OFA0678	3014	insert gRNA tag in OLE1	BFA0078	YFA1002
OFA0685	LEUter_r	TTCCTTATCACGTTGAGCC	CYC1_100term	ATTAAAAAAAATAAATAGGGACCTAGACTTCAGGTTGTCT	ATTAAAAAAAATAAATAGGGACCTAGACTTCAGGTTGTCTTTCCTTATCACGTTGAGCC	59	OFA0679	3014	insert gRNA tag in CYC1	BFA0078	YFA1003
OFA0686	LEUter_r	TTCCTTATCACGTTGAGCC	TPO1_100term	TATATGTCAGCTTTACGCTGCACAGTGTCTATAATGCTAT	TATATGTCAGCTTTACGCTGCACAGTGTCTATAATGCTATTTCCTTATCACGTTGAGCC	59	OFA0680	3014	insert gRNA tag in TPO1	BFA0078	YFA1004
OFA0687	LEUter_r	TTCCTTATCACGTTGAGCC	CTS1_100term	AAGTAGTCGATTATAAAAACGTAAAAACATGAAGGCAGGG	AAGTAGTCGATTATAAAAACGTAAAAACATGAAGGCAGGGTTCCTTATCACGTTGAGCC	59	OFA0681	3014	insert gRNA tag in CTS1	BFA0078	YFA1005
OFA0689	LEUter_r	TTCCTTATCACGTTGAGCC	RPS10A_100term	TTTTGATTTCACTTTATTAATTAAAAAATATACATAAGTT	TTTTGATTTCACTTTATTAATTAAAAAATATACATAAGTTTTCCTTATCACGTTGAGCC	59	OFA0683	3014	insert gRNA tag in RPS10A	BFA0078	YFA1007
	tagging gene with GFP-gRNA (not form GFP collection) (control transformant)
OFA0732	OLE1-verifUP-f	GGGACAAACAAACCTTCTTG			GGGACAAACAAACCTTCTTG	20	OFA0738, OFA0060	580,1170	control insertion in OLE1	YFA1002	YFA1002
OFA0733	CYC1-verifUP-f	GGTGCTACACTTTTCAAGAC			GGTGCTACACTTTTCAAGAC	20	OFA0739, OFA0060	588,1168	control insertion in CYC1	YFA1003	YFA1003
OFA0734	TPO1-verifUP-f	ATCGGGTTCGGTTTAATGG			ATCGGGTTCGGTTTAATGG	19	OFA0740, OFA0060	545,1153	control insertion in TPO1	YFA1004	YFA1004
OFA0735	CTS1-verifUP-f	CCAGTACAAGCTCAGGTAG			CCAGTACAAGCTCAGGTAG	19	OFA0741, OFA0060	583,1161	control insertion in CTS1	YFA1005	YFA1005
OFA0737	RPS10A-verifUP-f	AGAAGGTGTTGTTGTCGC			AGAAGGTGTTGTTGTCGC	18	OFA0743, OFA0060	547,1139	control insertion in RPS10A	YFA1007	YFA1007
OFA0738	OLE1-verifDW-r	GAACTTAAGTTGAAACTTAGTGC			GAACTTAAGTTGAAACTTAGTGC	23	OFA0732	580	control insertion in OLE1	YFA1002	YFA1002
OFA0739	CYC1-verifDW-r	GTAAACTGCGAAGCTTGC			GTAAACTGCGAAGCTTGC	18	OFA0733	588	control insertion in CYC1	YFA1003	YFA1003
OFA0740	TPO1-verifDW-r	GGGATATCACTACTCTCTAAGTAC			GGGATATCACTACTCTCTAAGTAC	24	OFA0734	545	control insertion in TPO1	YFA1004	YFA1004
OFA0741	CTS1-verifDW-r	GGAATTGGCATTCTCAACAATC			GGAATTGGCATTCTCAACAATC	22	OFA0735	583	control insertion in CTS1	YFA1005	YFA1005
OFA0743	RPS10A-verifDW-r	TGAATATTATAGTCGTGCGCC			TGAATATTATAGTCGTGCGCC	21	OFA0737	547	control insertion in RPS10A	YFA1007	YFA1007
	FineMapping chromosome X regions: Step1 insertion of the resistance cassettes
OFA0796	LINKpro_f	cgctgcaggtcgacggatc	FM10_disp1F	TTCCTTGGTAGAGGAGTCTCCCATGGGCGATTTCGGGATC	TTCCTTGGTAGAGGAGTCTCCCATGGGCGATTTCGGGATCcgctgcaggtcgacggatc	59	OFA0797	1663	insert hphMX for fine mapping chrX:146490	BFA0002	YFA1240
OFA0797	TEFter_r	gcagtatagcgaccagcat	FM10_disp1R	CAAAGTAGTATATCACGCCAGGCTGTGTAGGCTGGTTATT	CAAAGTAGTATATCACGCCAGGCTGTGTAGGCTGGTTATTgcagtatagcgaccagcat	59	OFA0796	1663	insert hphMX for fine mapping chrX:146490	BFA0002	YFA1240
OFA0798	LINKpro_f	cgctgcaggtcgacggatc	FM10_disp2F	CGTATTAGAGCTGGTGTAAGCGGGATAACTATCGTACTGG	CGTATTAGAGCTGGTGTAAGCGGGATAACTATCGTACTGGcgctgcaggtcgacggatc	59	OFA0799	1444	insert KanMX for fine mapping chrX:149965	BFA0003	YFA1203
OFA0799	TEFter_r	gcagtatagcgaccagcat	FM10_disp2R	TCGTTGTACCTCCAGCCAGGGCACCTGCCCCAAATCCTTT	TCGTTGTACCTCCAGCCAGGGCACCTGCCCCAAATCCTTTgcagtatagcgaccagcat	59	OFA0798	1444	insert KanMX for fine mapping chrX:149965	BFA0003	YFA1203
OFA0800	LINKpro_f	cgctgcaggtcgacggatc	FM10_disp3F	TAGTTACTTAAGTGGCATTCACTATAAAGTTCACGCTGTG	TAGTTACTTAAGTGGCATTCACTATAAAGTTCACGCTGTGcgctgcaggtcgacggatc	59	OFA0801	1663	insert hphMX for fine mapping chrX:155306	BFA0002	YFA1242,YFA1244
OFA0801	TEFter_r	gcagtatagcgaccagcat	FM10_disp3R	AACTGACTATGACGACCACTATTACCAGCTGTGGAGAAGT	AACTGACTATGACGACCACTATTACCAGCTGTGGAGAAGTgcagtatagcgaccagcat	59	OFA0800	1663	insert hphMX for fine mapping chrX:155306	BFA0002	YFA1242,YFA1244
OFA0802	LINKpro_f	cgctgcaggtcgacggatc	FM10_disp4F	CGAGTAATAATTCAACAAGGCCAATTCCAGCAATACCTAT	CGAGTAATAATTCAACAAGGCCAATTCCAGCAATACCTATcgctgcaggtcgacggatc	59	OFA0803	1444	insert KanMX for fine mapping chrX:160674	BFA0003	YFA1205
OFA0803	TEFter_r	gcagtatagcgaccagcat	FM10_disp4R	TGGCGCGTGGGTGGGGAGCGCCTCATAATCGGGTAGATCC	TGGCGCGTGGGTGGGGAGCGCCTCATAATCGGGTAGATCCgcagtatagcgaccagcat	59	OFA0802	1444	insert KanMX for fine mapping chrX:160674	BFA0003	YFA1205
OFA0804	LINKpro_f	cgctgcaggtcgacggatc	FM10_disp5F	AATTAGCTGCCTCTTTAGCTCGATCTGTCCCGGTGCTCCA	AATTAGCTGCCTCTTTAGCTCGATCTGTCCCGGTGCTCCAcgctgcaggtcgacggatc	59	OFA0805	1663	insert hphMX for fine mapping chrX:165072	BFA0002	YFA1246
OFA0805	TEFter_r	gcagtatagcgaccagcat	FM10_disp5R	TTAAGCGCCCGAAACAAGTGCCAAGGAATGCTACTAACAG	TTAAGCGCCCGAAACAAGTGCCAAGGAATGCTACTAACAGgcagtatagcgaccagcat	59	OFA0804	1663	insert hphMX for fine mapping chrX:165072	BFA0002	YFA1246
	FineMapping chromosome X regions: Step1 control of insertion, Step2 repair template for double cut CRISPR swap
OFA0851	FM10_rep1R	CTATTCAGTATAACCCGAATGG			CTATTCAGTATAACCCGAATGG	22	OFA0806	313	control of insertion pos1	YFA1240	YFA1240
OFA0806	FM10_rep1F	GTATACTCAGGAGCCAGCG			GTATACTCAGGAGCCAGCG	19	OFA0851,OFA0808	313,3674	control of insertion pos1 and repair template regionA	YFA1240,YFA0005,EFA0004,YFA0013	YFA1240,YPFA-ChB1,YFA1315-1330
OFA0808	FM10_rep2F-r	CAAAACCTGGTGTATCCCC			CAAAACCTGGTGTATCCCC	19	OFA0807,OFA0806	205,3674	control of insertion pos2 and repair template regionA	YFA1203,YFA0005,EFA0004,YFA0013	YFA1203,YPFA-ChB1,YFA1315-1330
OFA0807	FM10_rep2R-f	GATAGCCAGAAGGATACTGG			GATAGCCAGAAGGATACTGG	20	OFA0808,OFA0809	205,5564	control of insertion pos2 and repair template regionB	YFA1203,YFA0005,EFA0004	YFA1203,YPFA-ChB1
OFA0809	FM10_rep3R	CCCAACTACGGATACCAGTC			CCCAACTACGGATACCAGTC	20	OFA0810,OFA0807	253,5564	control of insertion pos3 and repair template regionB	YFA1242,YFA1244,YFA0005,EFA0004	YFA1242,YFA1244,YPFA-ChB1
OFA0810	FM10_rep3F	CTTGAAGACAAGGAGGTTCG			CTTGAAGACAAGGAGGTTCG	20	OFA0809,OFA0811	253,5561	control of insertion pos3 and repair template regionC	YFA1242,YFA1244,YFA0005,EFA0004	YFA1242,YFA1244,YPFA-ChB1
OFA0811	FM10_rep4R	TTATACCAGCAAATGCACCC			TTATACCAGCAAATGCACCC	20	OFA0812,OFA0810	198,5561	control of insertion pos4 and repair template regionC	YFA1205,YFA0005,EFA0004	YFA1205,YPFA-ChB1
OFA0812	FM10_rep4F	ATTCGTTAACACCTCTTAAGG			ATTCGTTAACACCTCTTAAGG	21	OFA0811,OFA0813	198,4651	control of insertion pos4 and repair template regionD	YFA1205,YFA0005,EFA0004	YFA1205,YPFA-ChB1
OFA0813	FM10_rep5R	AAACGTGAGCTGGCAAATC			AAACGTGAGCTGGCAAATC	19	OFA0849,OFA0812	384,4651	control of insertion pos5 and repair template regionD	YFA1246,YFA0005,EFA0004	YFA1246,YPFA-ChB1
OFA0849	FM10_rep5F	TAAGGCTACACGACTTTCG			TAAGGCTACACGACTTTCG	19	OFA0813	384	control of insertion pos5	YFA1246	YFA1246
	FineMapping chromosome X regions: Step1 control of insertion: primers in resistance cassettes
OFA0827	KANin_f	acgaatgaataacggtttgg			acgaatgaataacggtttgg	20	OFA0808,OFA0811	558(+125)	control of cassette insertion	YFA1203.YFA1205	YFA1203.YFA1205
OFA0828	KANin_r	acaggaatcgaatgcaacc			acaggaatcgaatgcaacc	19	OFA0807,OFA0812	831(+125)	control of cassette insertion	YFA1203.YFA1205	YFA1203.YFA1205
OFA0829	HYGin_f	gcttgtatggagcagcag			gcttgtatggagcagcag	18	OFA0851,OFA0809,OFA0813	513(+125)	control of cassette insertion	YFA1240,YFA1242,YFA1244,YFA1246,YFA1371	YFA1240,YFA1242,YFA1244,YFA1246,YFA1371
OFA0830	HYGin_r	gggagatgcaataggtcag			gggagatgcaataggtcag	19	OFA0806,OFA0810,OFA0849	710(+125)	control of cassette insertion	YFA1240,YFA1242,YFA1244,YFA1246,YFA1371	YFA1240,YFA1242,YFA1244,YFA1246,YFA1371
	YAK1 allelic swap: building of the hphMX insert
OFA0871	LINKpro_f	cgctgcaggtcgacggatc	YAK1end	TCGACGCTATCAGCACCACCAGTGGCAGAGCTAGGATTAT	TCGACGCTATCAGCACCACCAGTGGCAGAGCTAGGATTATcgctgcaggtcgacggatc	59	OFA0872	1663	insert hphMX for YAK1deletion	BFA0002	YFA1371
OFA0872	TEFter_r	gcagtatagcgaccagcat	YAK1start	TCGTTGTACCTCCAGCCAGGGCACCTGCCCCAAATCCTTT	TCGTTGTACCTCCAGCCAGGGCACCTGCCCCAAATCCTTTgcagtatagcgaccagcat	59	OFA0871	1663	insert hphMX for YAK1deletion	BFA0002	YFA1371
	YAK1 allelic swap: building CRISPRswap template (without and with the variant)
OFA0874	fuse1_f	TCTCCTTCCTTTTACTGATAGC			TCTCCTTCCTTTTACTGATAGC	22	OFA0875,OFA0876	610	PCR fusion adding YAK1wt/YAK1variant in a yak1-deleted strains, PCR1	YFA0005	YFA1383-1392
OFA0875	fuse1BY_r	CGCTTCTGAATATAACCAATTAAC			CGCTTCTGAATATAACCAATTAAC	24	OFA0874	610	PCR fusion adding YAK1wt/YAK1variant in a yak1-deleted strains, PCR1	YFA0005	YFA1383-1387
OFA0876	fuse1GG_r	CGCTTCTGAATATAACTAATTAAC			CGCTTCTGAATATAACTAATTAAC	24	OFA0874	610	PCR fusion adding YAK1wt/YAK1variant in a yak1-deleted strains, PCR1	YFA0005	YFA1388-1392
OFA0877	fuse2BY_f	CTTGTTAATTGGTTATATTCAGAAGC			CTTGTTAATTGGTTATATTCAGAAGC	26	OFA0879	1439	PCR fusion adding YAK1wt/YAK1variant in a yak1-deleted strains, PCR1	YFA0005	YFA1383-1387
OFA0878	fuse2GG_f	CTTGTTAATTAGTTATATTCAGAAGC			CTTGTTAATTAGTTATATTCAGAAGC	26	OFA0879	1439	PCR fusion adding YAK1wt/YAK1variant in a yak1-deleted strains, PCR1	YFA0005	YFA1388-1392
OFA0879	fuse2_r	CAAAACCTGGTGTATCCCC			CAAAACCTGGTGTATCCCC	19	OFA0877,OFA0878	1439	PCR fusion adding YAK1wt/YAK1variant in a yak1-deleted strains, PCR1	YFA0005	YFA1383-1392
OFA0880	fus1f_f	TTTTACTGATAGCACCAATGTC			TTTTACTGATAGCACCAATGTC	22	OFA0881	2003	PCR fusion adding YAK1wt/YAK1variant in a yak1-deleted strains, PCR2	YFA0005	YFA1383-1392
OFA0881	fus2f_r	GTATCCCCCTCAATACGATG			GTATCCCCCTCAATACGATG	20	OFA0880	2003	PCR fusion adding YAK1wt/YAK1variant in a yak1-deleted strains, PCR2	YFA0005	YFA1383-1392
	YAK1 allelic swap: control of the presence of the variant with sanger sequencing
OFA0882	Yakseq_f	CCATATCTATCATCCACGATGG			CCATATCTATCATCCACGATGG	22	OFA0883	473	sequencing control of YAK1variant	YFA1383-1392	YFA1383-1392
OFA0883	Yakseq_r	TGTCCACAAGAACCACTTATG			TGTCCACAAGAACCACTTATG	21	OFA0882	473	sequencing control of YAK1variant	YFA1383-1392	YFA1383-1392
	transfer of the GFP-gRNAtag of GPD1 from GBY-PD1-GFP background to BY background (without YAK1 variant): building of the insert
OFA0850	GPD1verif_f	GTTGCTGATTTGATCACCAC			GTTGCTGATTTGATCACCAC	20	OFA0873	3738	insert for GPD1-GFP-gRNA	YFA0458	YFA1375,YFA1377
OFA0873	gpd1GrL_r	AAGCTCTTTGGAACTTGTCC			AAGCTCTTTGGAACTTGTCC	20	OFA0850	3738	insert for GPD1-GFP-gRNA	YFA0458	YFA1375,YFA1377
	RT-qPCR primers (mRNA-gRNA and ACT1 reporter)
OFA0167	qPC-cut2-F(HDV)	aaagtggcaccgagtcgg			aaagtggcaccgagtcgg	18	OFA0168	90	qPCR	RNA of tagged strains
OFA0168	qPC-cut2-R(HDV)	ccattcgccatgccgaagc			ccattcgccatgccgaagc	19	OFA0167	90	qPCR	RNA of tagged strains
OFA0169	qPC-gRNA-F	catacagtaggatcctagttttagagc			catacagtaggatcctagttttagagc	27	OFA0170	88	qPCR	RNA of tagged strains
OFA0170	qPC-gRNA-R	gactcggtgccactttttcaag			gactcggtgccactttttcaag	22	OFA0169	88	qPCR	RNA of tagged strains
OFA0171	qPC-cut1-F(Hh)	gctgggattacacatggcatgg			gctgggattacacatggcatgg	22	OFA0172	156	qPCR	RNA of tagged strains
OFA0172	qPC-cut1-R(Hh)	gctctaaaactaggatcctactgtatg			gctctaaaactaggatcctactgtatg	27	OFA0171	156	qPCR	RNA of tagged strains
OFA0173	qPC-GFP-F	gacacaacattgaagatggaagcg			gacacaacattgaagatggaagcg	24	OFA0174	117	qPCR	RNA of tagged strains
OFA0174	qPC-GFP-R	gggcagattgtgtggacagg			gggcagattgtgtggacagg	20	OFA0173	117	qPCR	RNA of tagged strains
OFA0884	ACT1qPCR_f	ATTATATGTTTAGAGGTTGCTGCTTTGG			ATTATATGTTTAGAGGTTGCTGCTTTGG	28	OFA0885	285	qPCR	RNA of tagged strains		https://www.ncbi.nlm.nih.gov/pmc/articles/PMC2776018/
OFA0885	ACT1qPCR_r	CAATTCGTTGTAGAAGGTATGATGCC			CAATTCGTTGTAGAAGGTATGATGCC	26	OFA0884	285	qPCR	RNA of tagged strains		https://www.ncbi.nlm.nih.gov/pmc/articles/PMC2776018/
