# Supplementary material for: Simultaneous quantification of mRNA and protein in single cells reveals post-transcriptional effects of genetic variation
Source: eLife journal article supplement (doi:10.7554/elife.60645), 2020-11-16
Supplement: supp [file elife-60645-supp-v1.zip › elife_poa_e60645_Supplementary_File_4.xlsx]

## Sheet: Sheet1
Table S4: List of plasmids
Reference name	Short description	origin	Stored in	shown in figure	used to build	plasmid size
BFA0001	Plas-NatMX4 (pAG25)	acquired (addgene_35121)	E. coli		BFA0029, BFA0078	3704
BFA0002	Plas-hphMX4 (pAG32)	acquired (addgene_35122)	E. coli		YFA1240, YFA1242, YFA1244, YFA1246 , YFA1371	4160
BFA0003	Plas-KanMX (pUG6SP-tTA)	acquired (addgene_41030)	E. coli		BFA0031, YFA1203, YFA1205	7438
BFA0006	Plas-mChery (pHS10)	acquired (addgene_25444)	E. coli		BFA0023	7504
BFA0009	Plas-c3gRNA	acquired (addgene_64381 publication: Farzadfard et al. 2013 'Tunable and Multifunctional Eukaryotic Transcription Factors Based on CRISPR/Cas)	E. coli		BFA0029, BFA0078	7713
BFA0007	Plas-pCYC1m	acquired (addgene_64389 publication: Farzadfard et al. 2013 'Tunable and Multifunctional Eukaryotic Transcription Factors Based on CRISPR/Cas)	E. coli		BFA0023	5485
BFA0008	Plas-dCAS9-VP64	acquired (addgene_49013 publication: Farzadfard et al. 2013 'Tunable and Multifunctional Eukaryotic Transcription Factors Based on CRISPR/Cas)	E. coli		BFA0023	10987
BFA0012	Plas-pZ3EV (pMN9)	acquired from Scott McIsaac-Bolstein lab	E. coli		BFA0029, BFA0078	5173
BFA0068	Plas-yeast_CEN (pRS415)	acquired from Mark McClellan, Gardner/Berman lab at U of MN	E. coli	2C, S5	BFA-ChB1 (not stored)	6021
BFA0069	Plas-yeast_2µ (pRS425)	acquired from Mark McClellan, Gardner/Berman lab at U of MN	E. coli	2C	BFA-ChB2 (not stored)	6849
BFA0024	Plas-pre-Z3EV (step1)	built (intermediate)	E. coli		BFA0029	9326
BFA0029	Plas-gRNA-Z3EV (pZ3EV)	built	E. coli	S1, available on AddGene #157659	BFA0078 , YFA0283, YFA0285, YFA0215, YFA0205	7019
BFA0078	Plas-gRNA-LEU2 (pTAG)	built	E. coli	S1, available on AddGene #157656	YFA0458, YFA0496, YFA0462, YFA0478, YFA0476, YFA1003, YFA1002, YFA1004, YFA1005, YFA1007, YFA1375, YFA1377	8741
BFA0023	Plas-pre-CRISPR reporter (step1)	built (intermediate)	E. coli		BFA0031	11842
BFA0031	Plas-CRISPR reporter (pdCAS9int)	built	E. coli	S1, available on AddGene #157658	YFA0196, YFA0198, YPFA-ChB2	11799
BFA0093	Plas-mChery-cons	built	E. coli		YFA0508	12102
BFA-ChB1 (not stored)	Plas-mCherry-CEN (pRS415-mCH)	built	E. coli	2C, S4	na	6896
BFA-ChB2 (not stored)	Plas-mCherry-2µ (pRS425-mCH)	built	E. coli	2C, S4	na	7724
BFA-ChB3 (not stored)	Plas-pre_dCAS9rep (step1)	built (intermediate)	E. coli		BFA0075,BFA0076	9648
BFA0076	Plas-dCAS9-CEN (pTRP-dCAS9-CEN)	built	E. coli	S4, S5	na	10177
BFA0075	Plas-dCAS9-2µ (pTRP-dCAS9-2µ)	built	E. coli	S4, S5	na	11067
