# Supplementary figures and images for: Simultaneous quantification of mRNA and protein in single cells reveals post-transcriptional effects of genetic variation
Source: eLife journal article supplement (doi:10.7554/elife.60645), 2020-11-16

Correlation before size correction

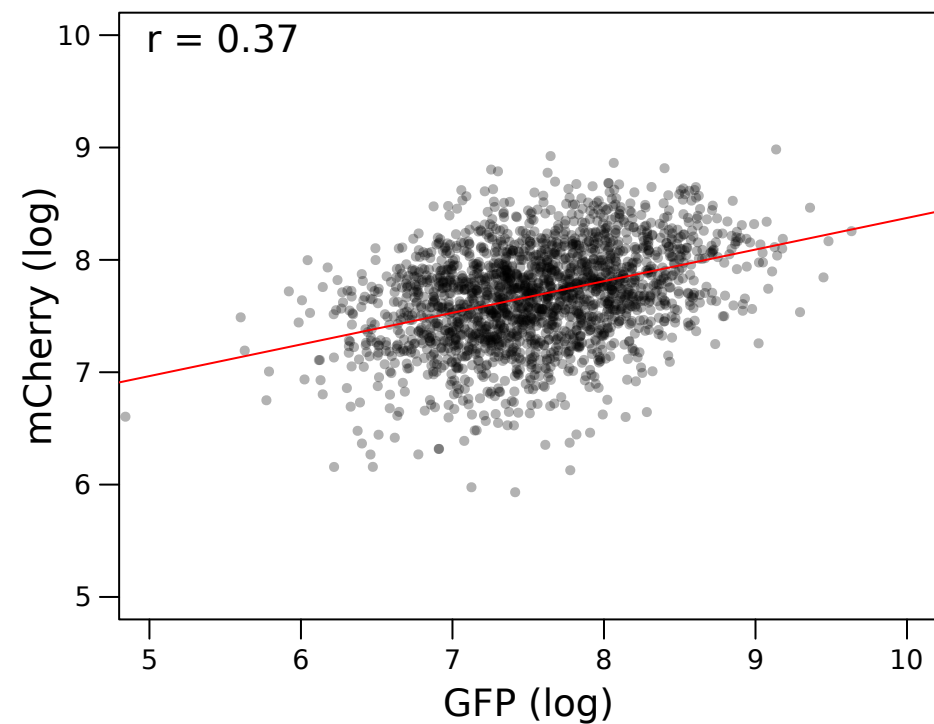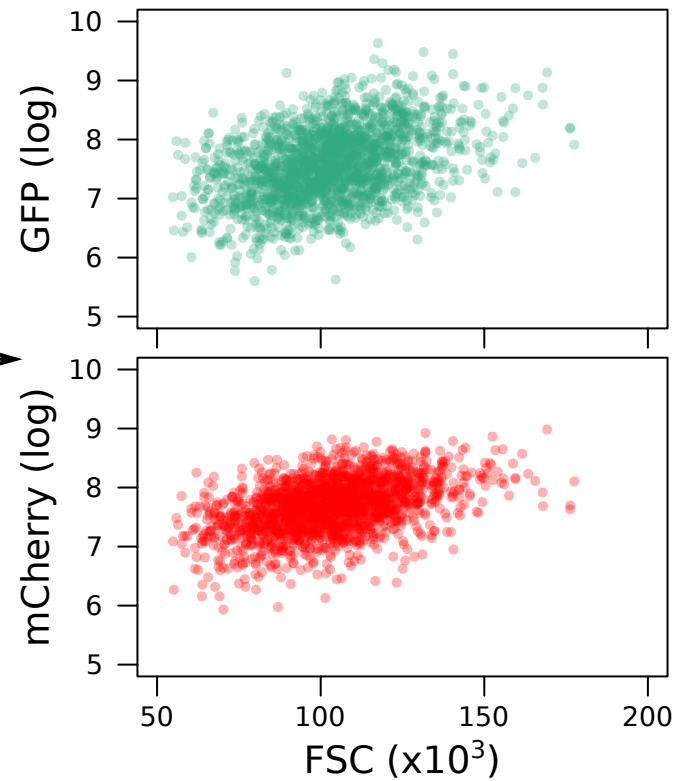

loess  
correction

Correlation after size correction

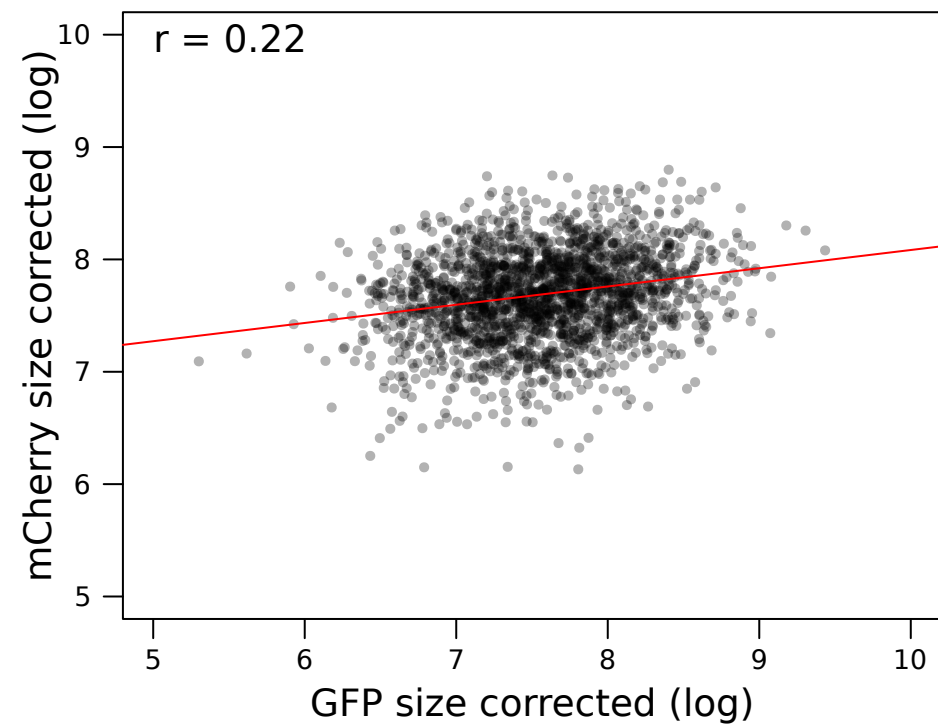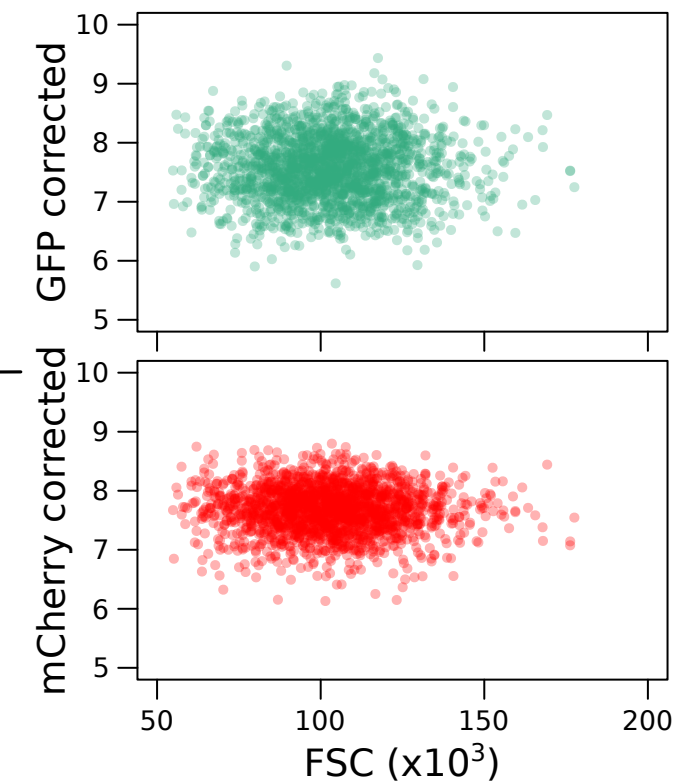

Supplement: supp [file elife-60645-supp-v1.zip]

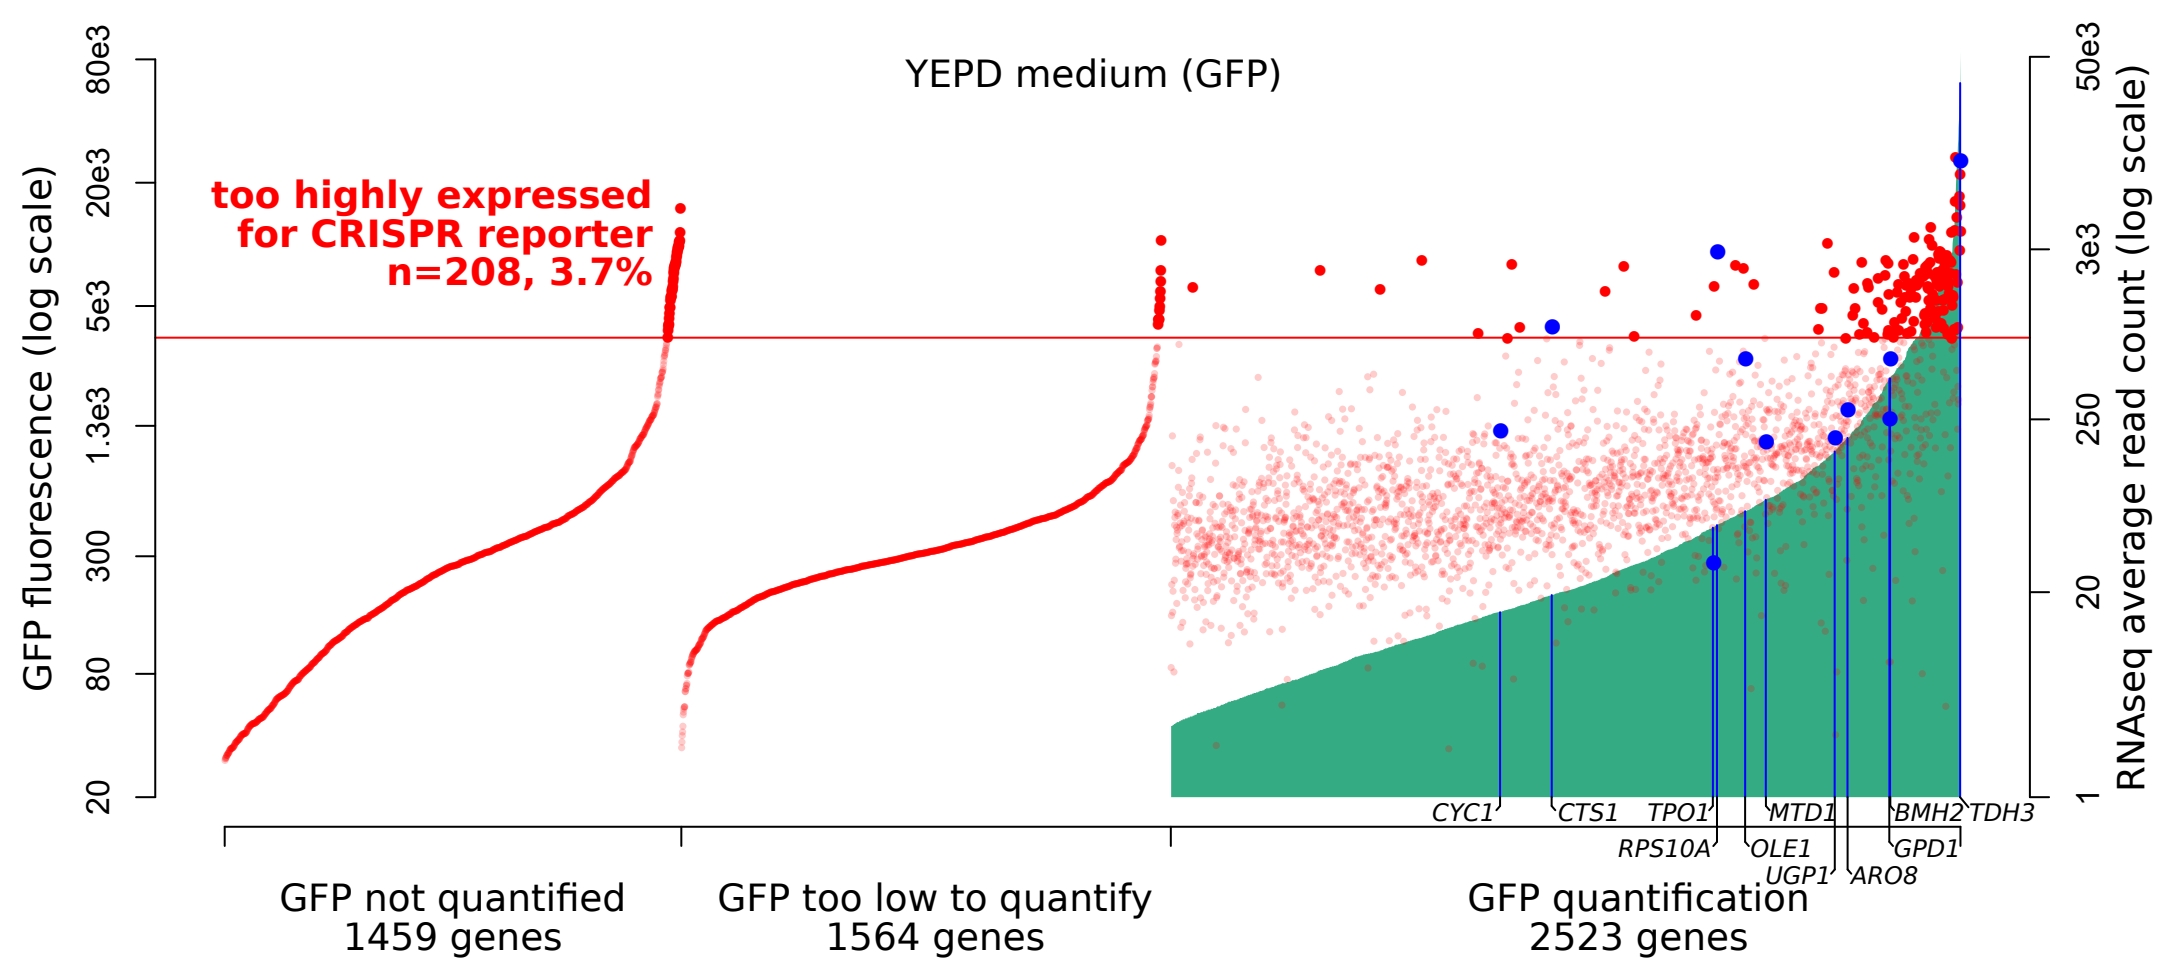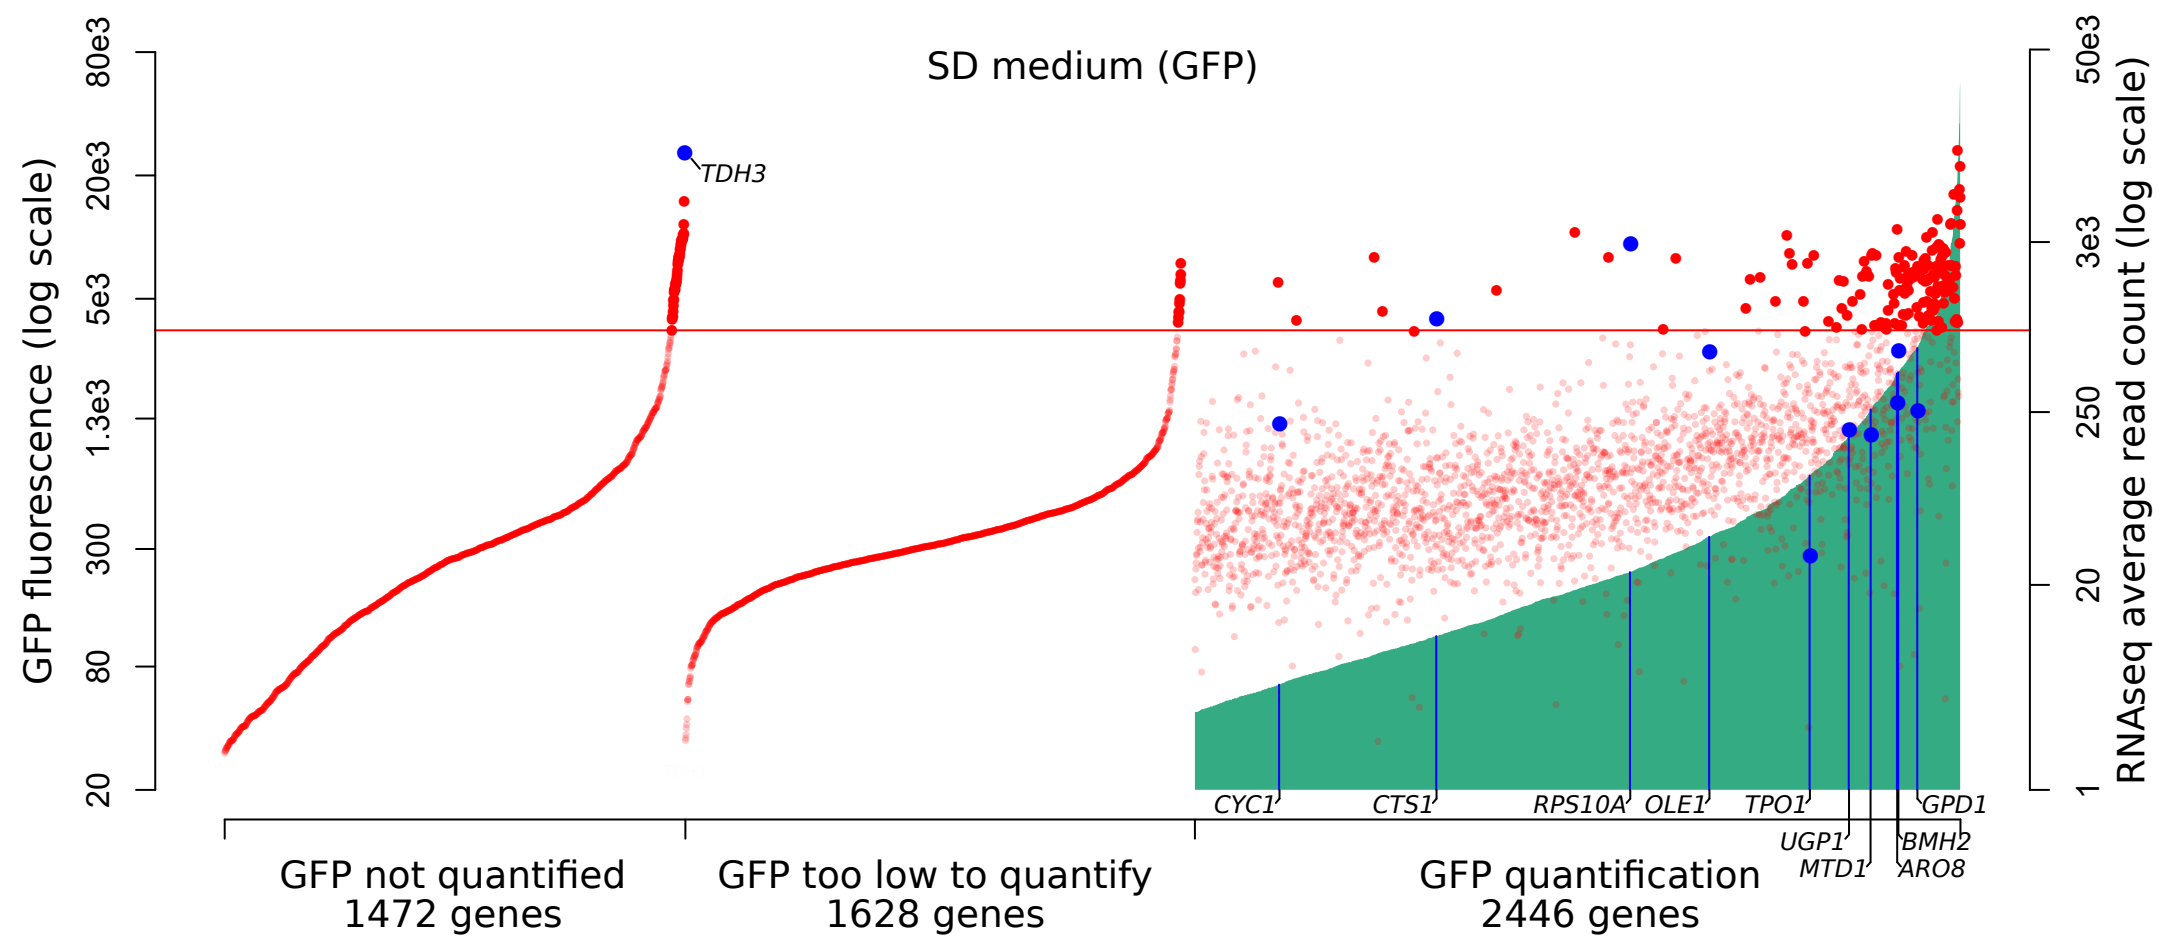

Supplement: supp [file elife-60645-supp-v1.zip]

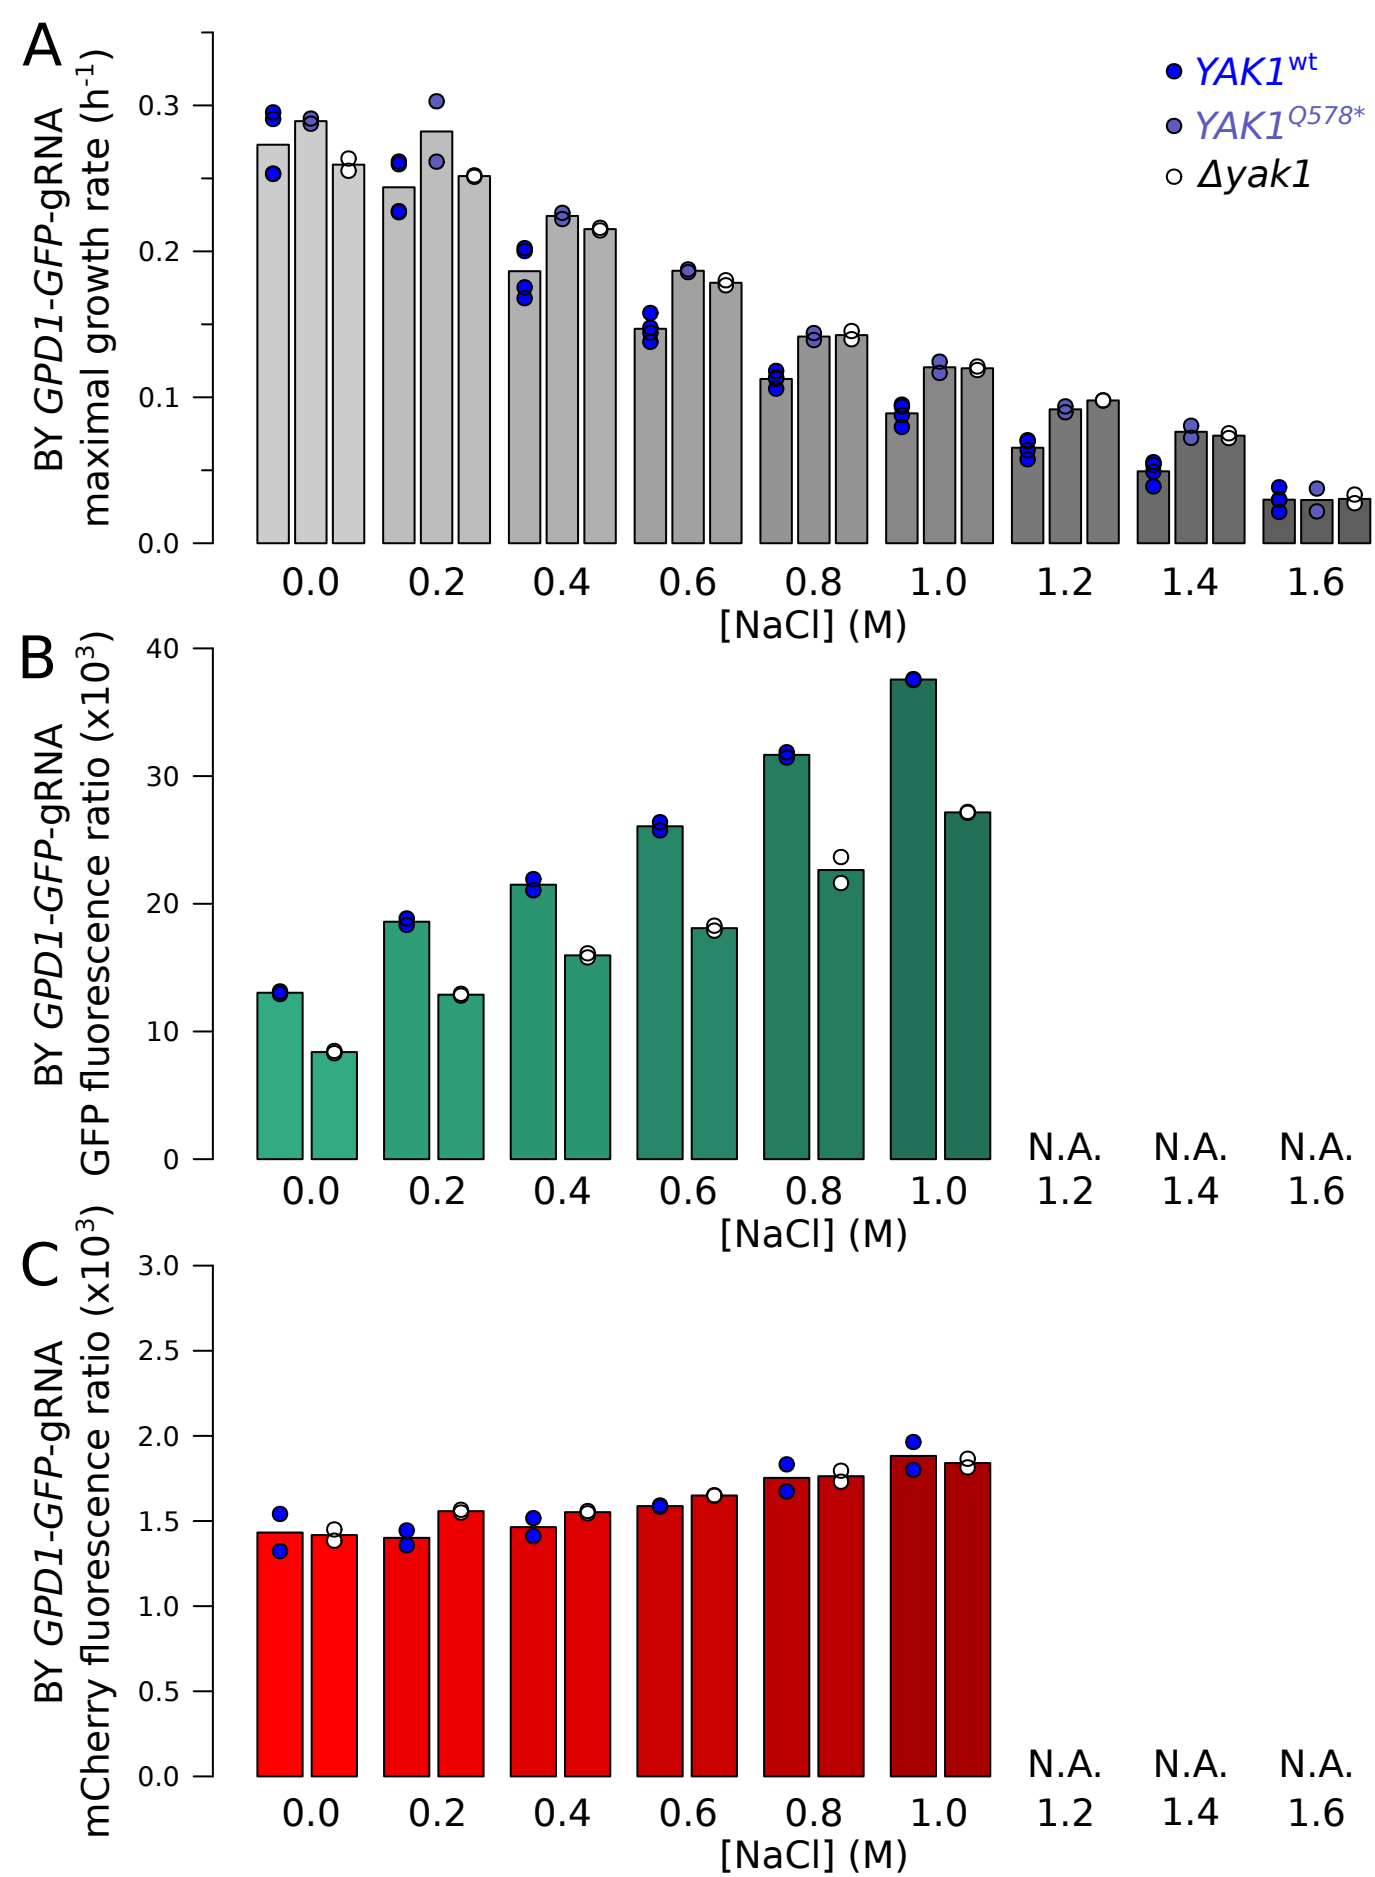

Supplement: supp [file elife-60645-supp-v1.zip]

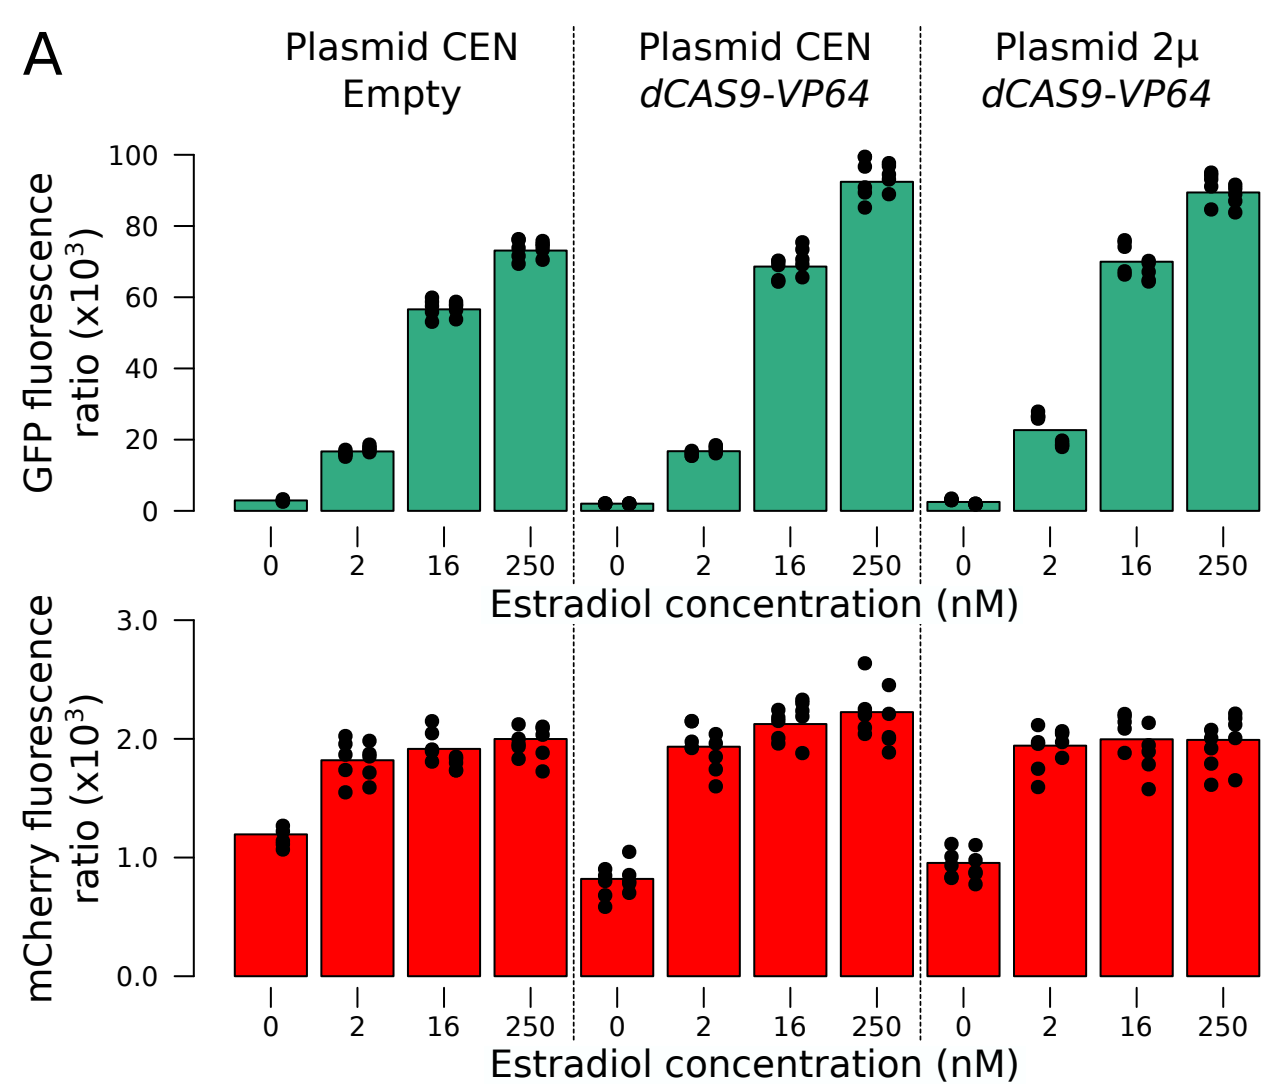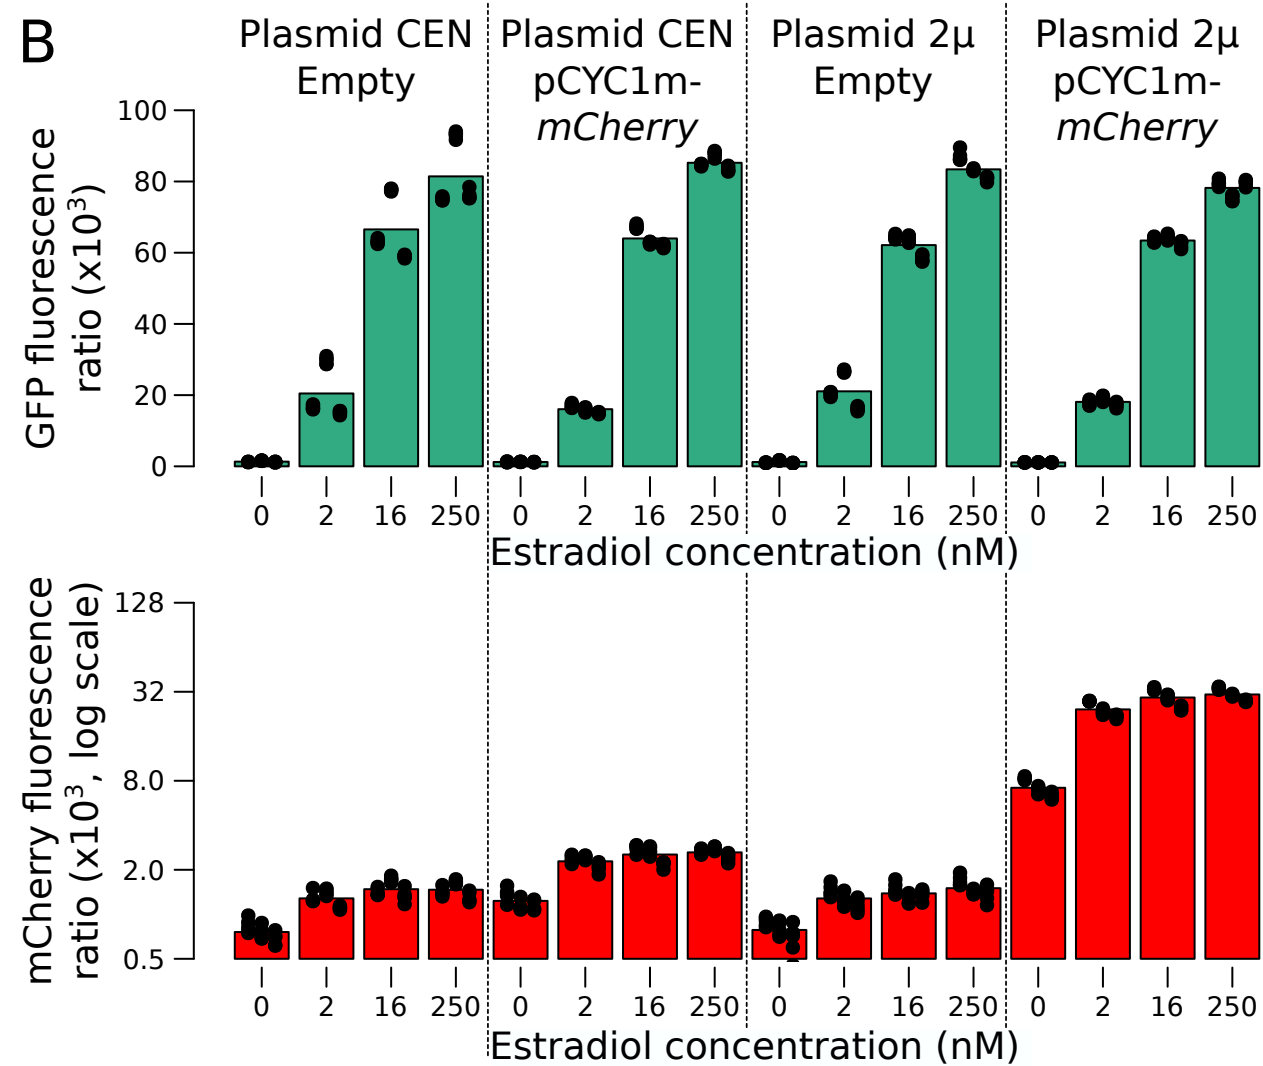

Supplement: supp [file elife-60645-supp-v1.zip]

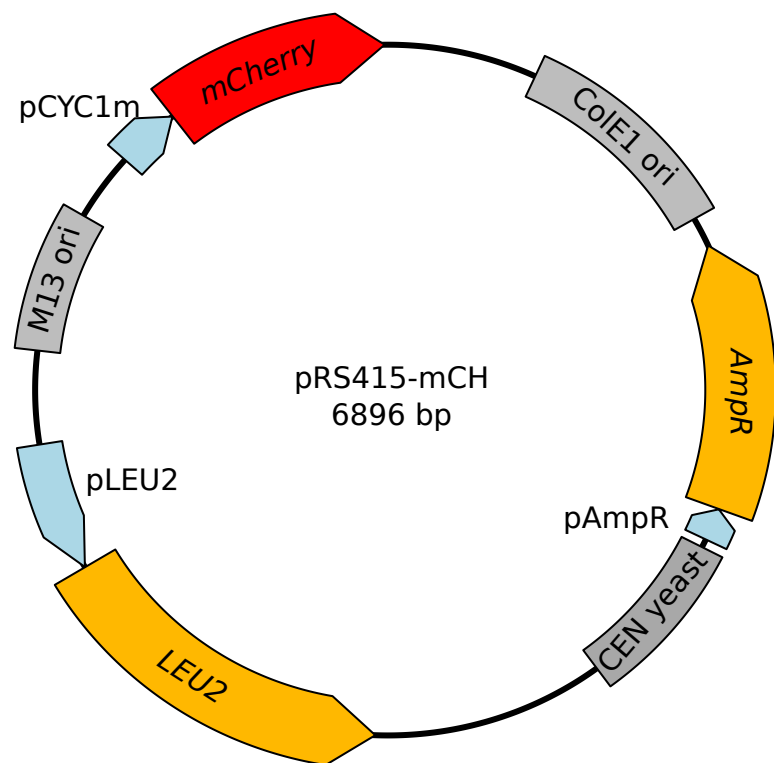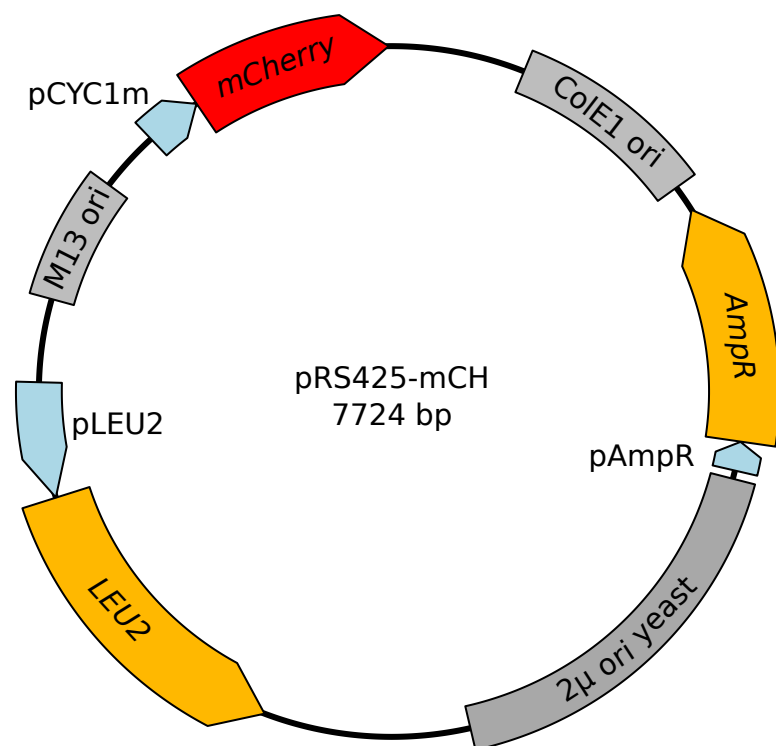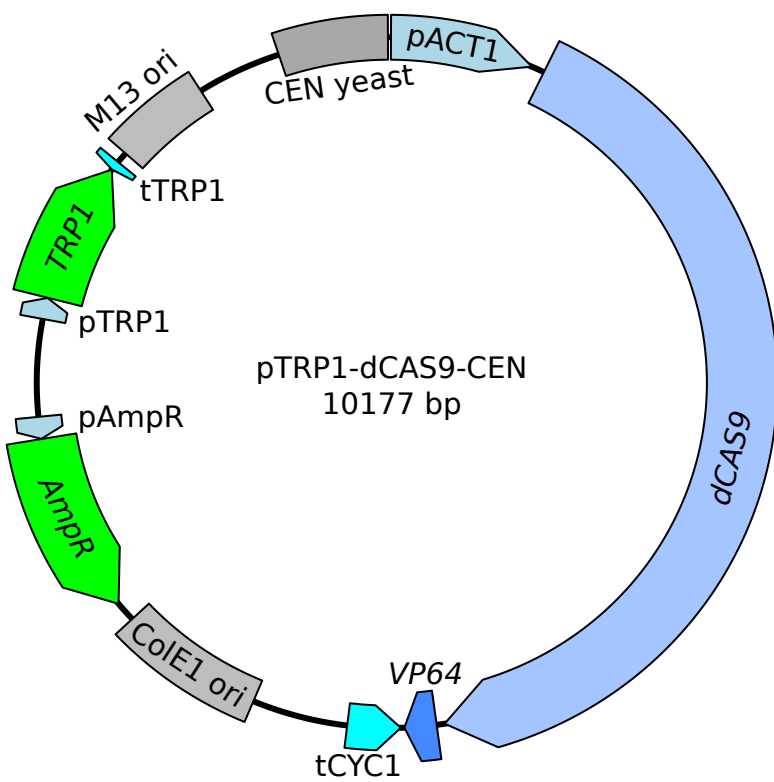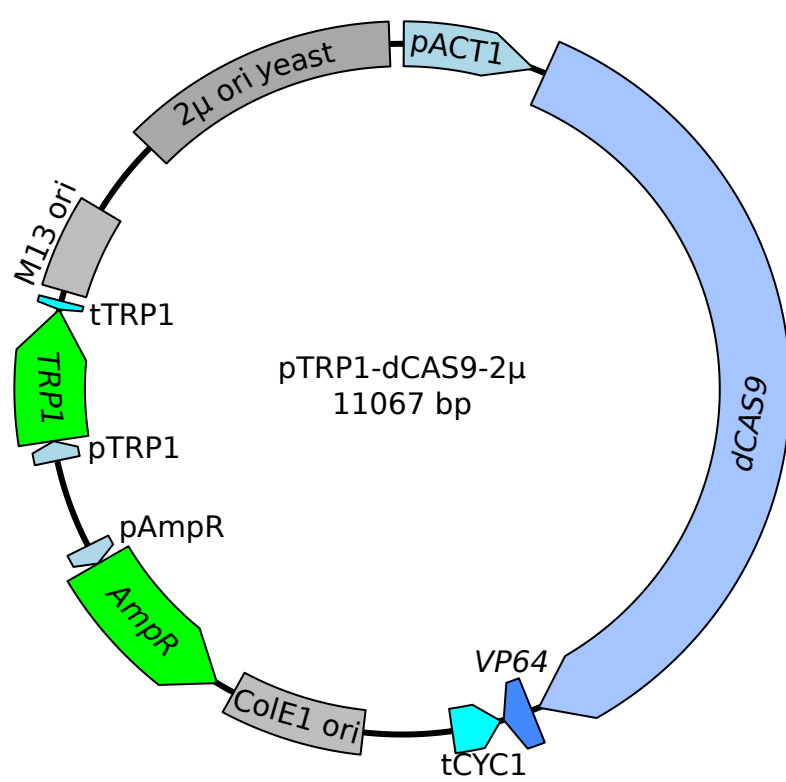

Supplement: supp [file elife-60645-supp-v1.zip]

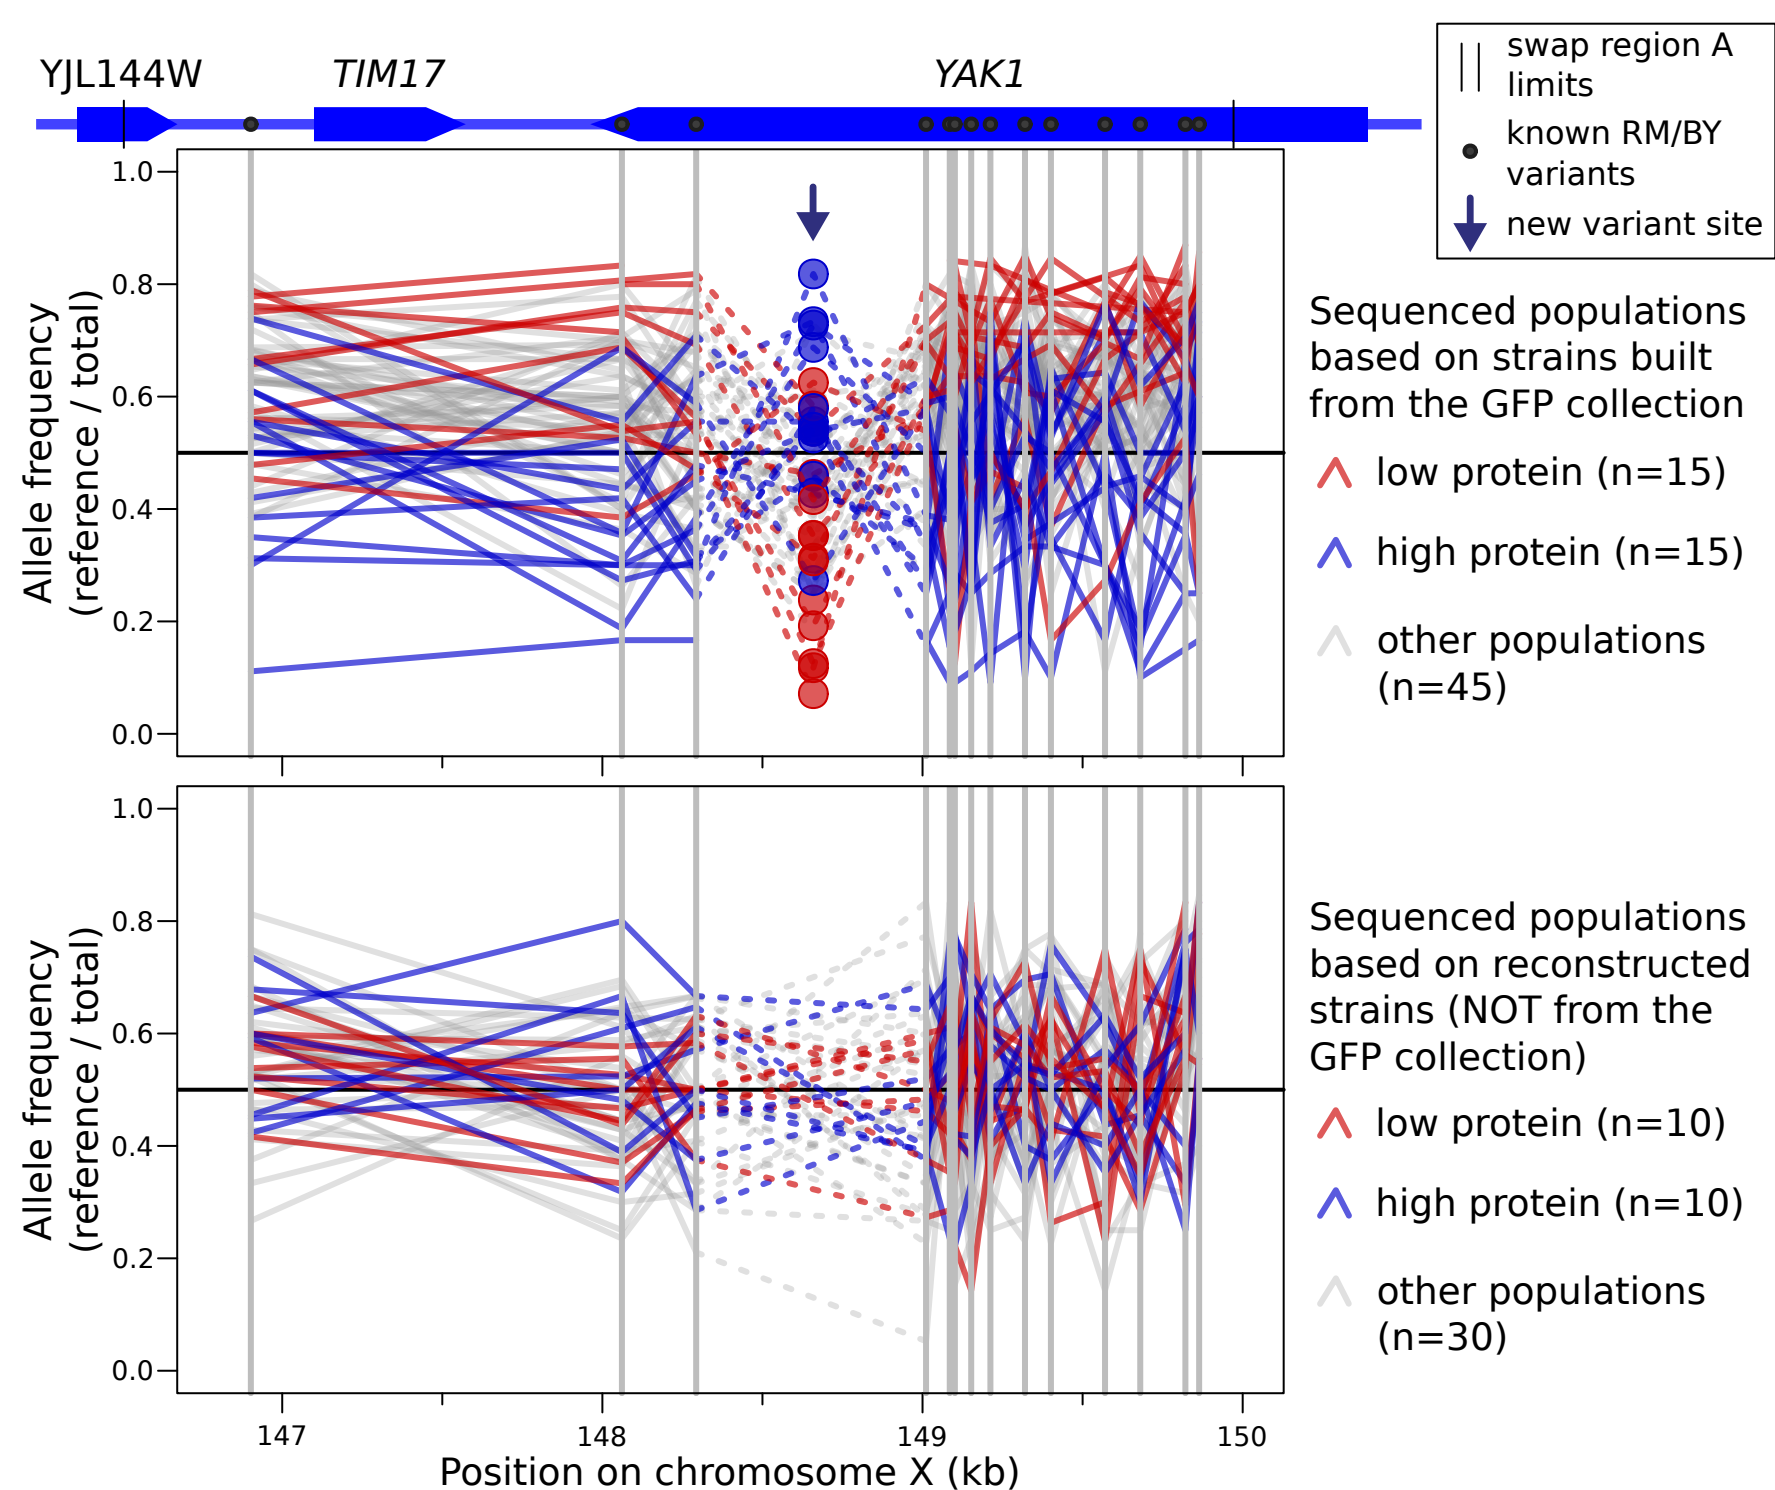

Supplement: supp [file elife-60645-supp-v1.zip]

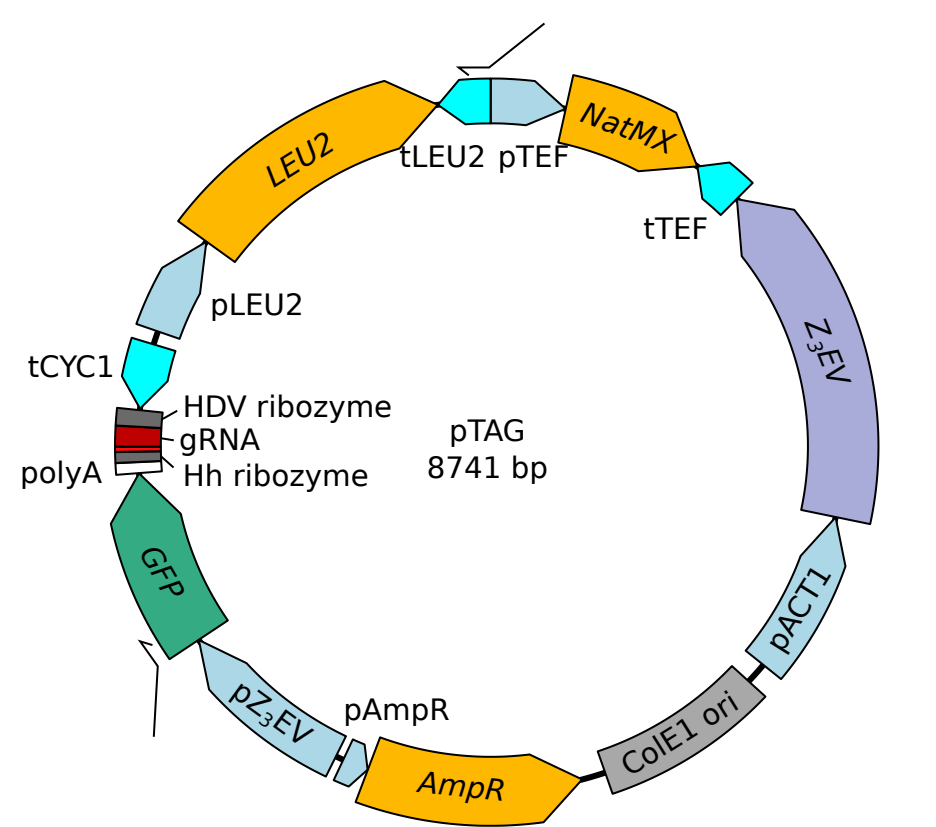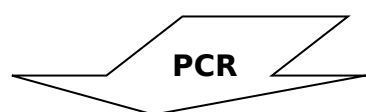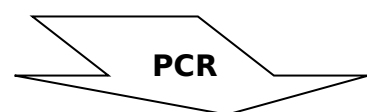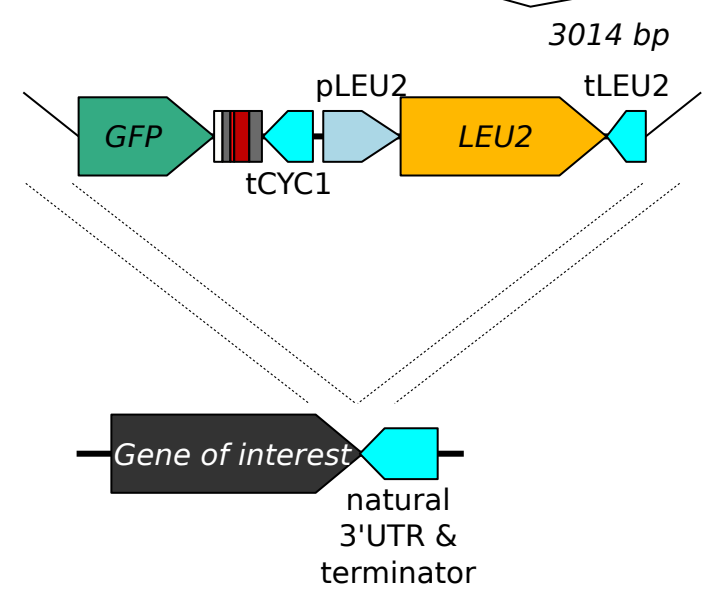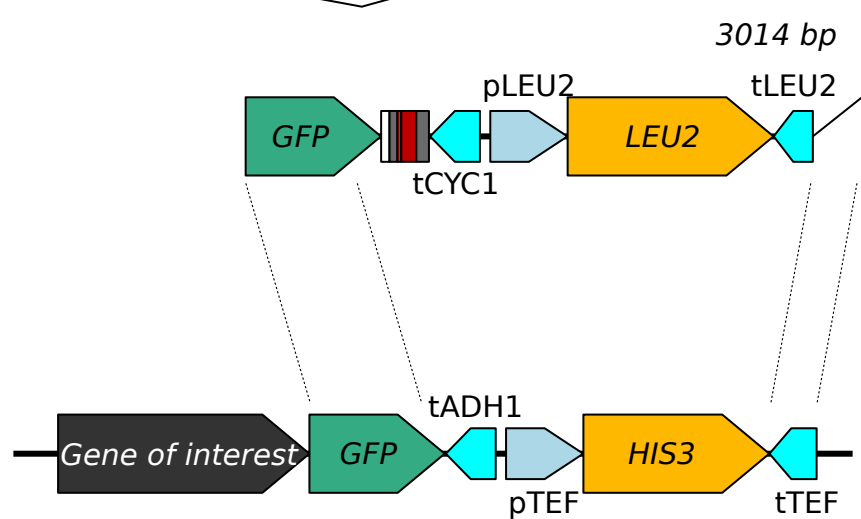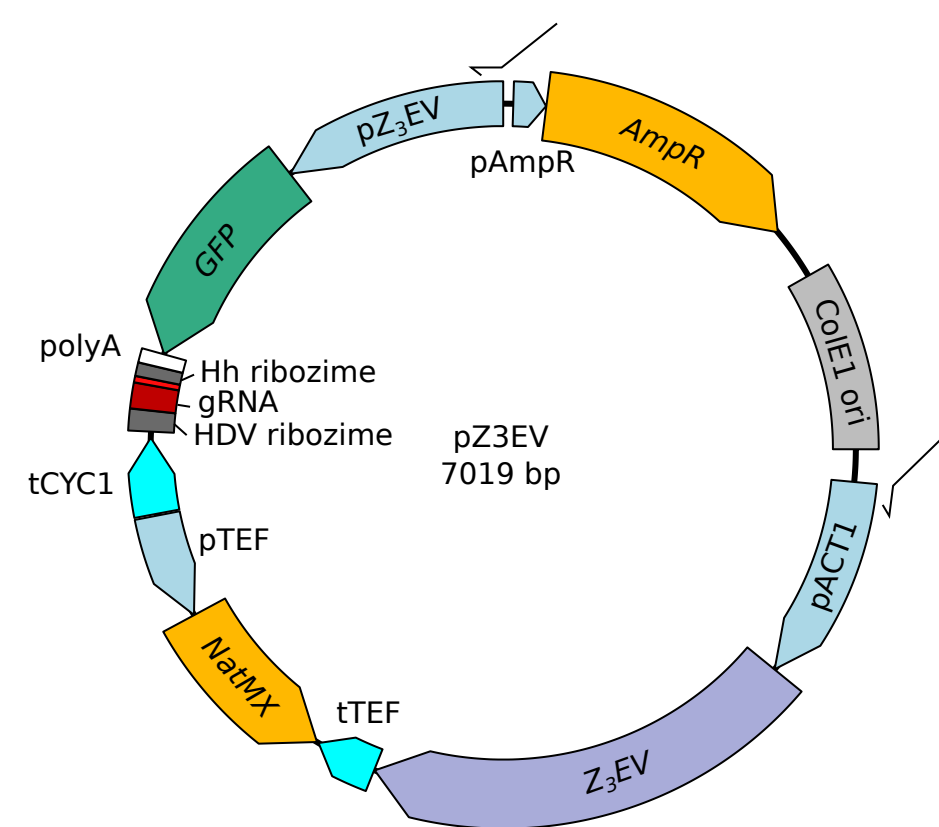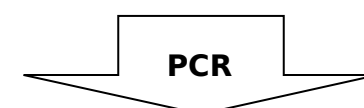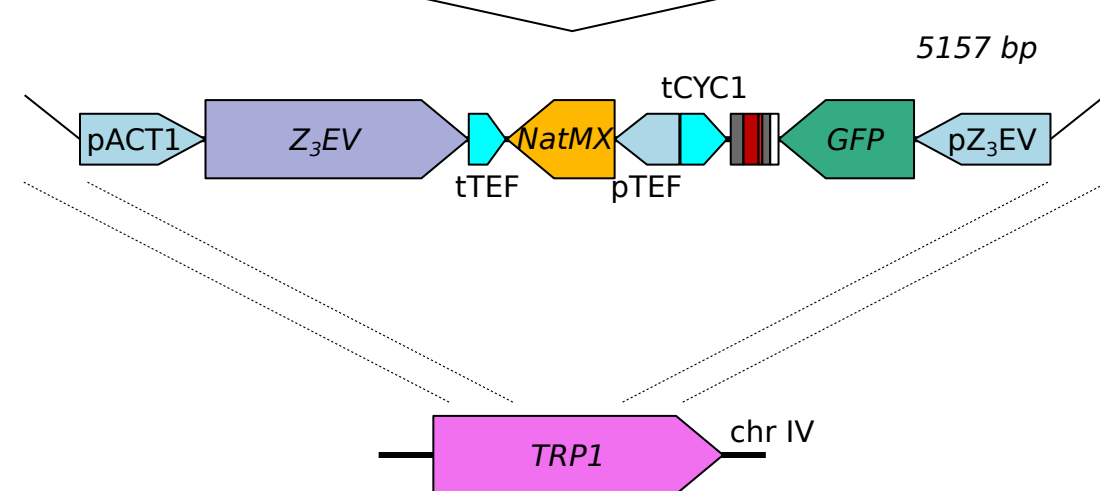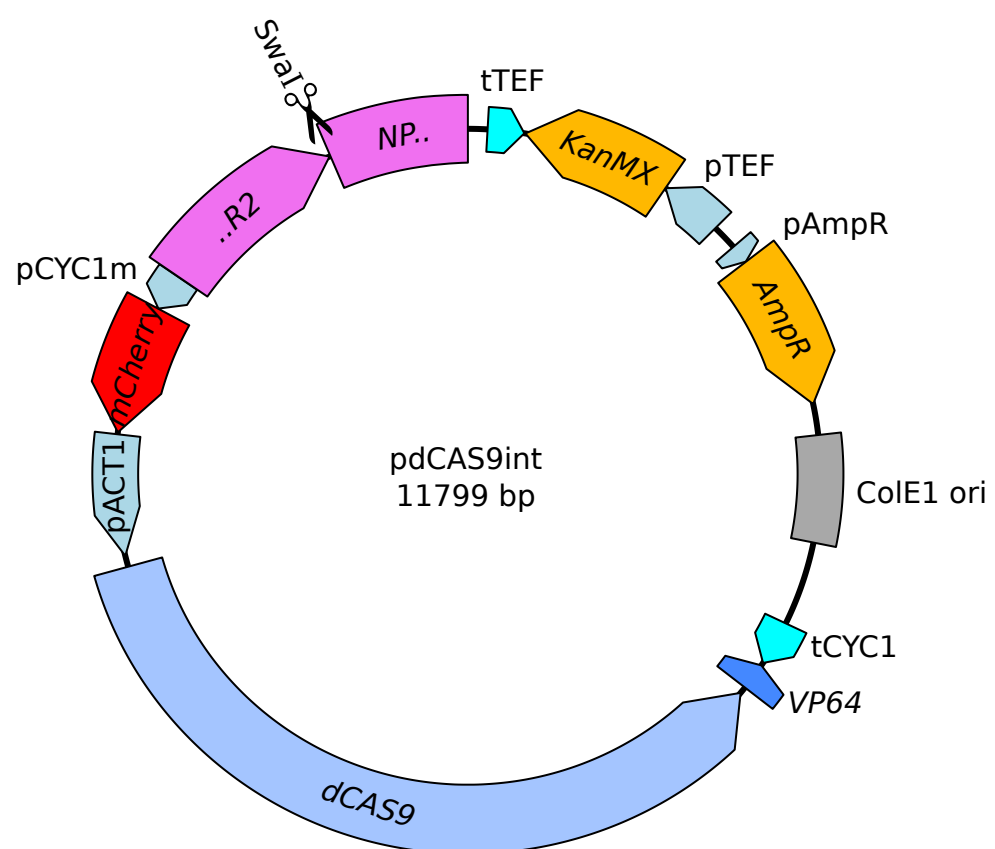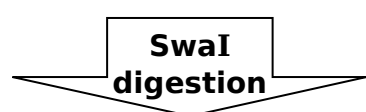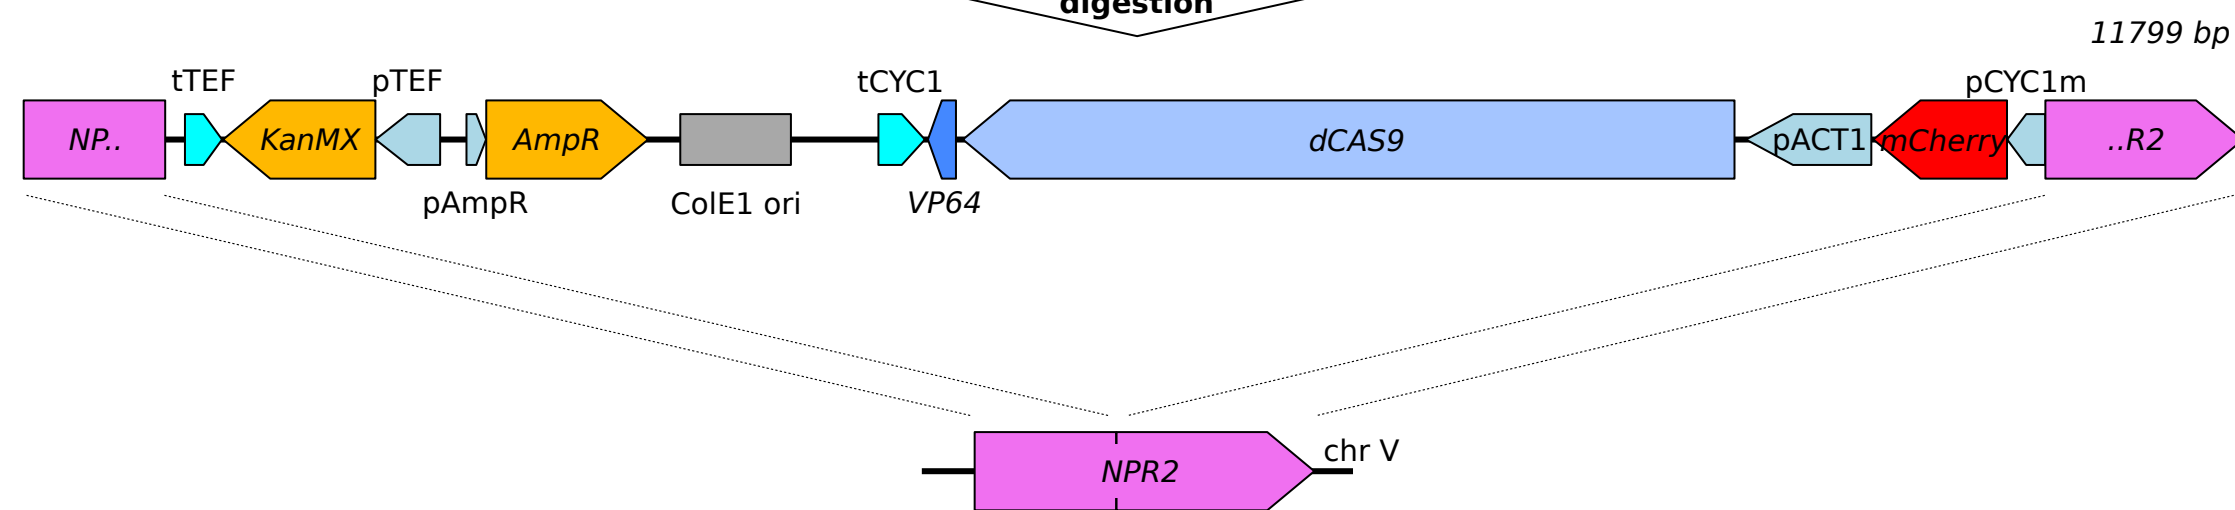

Supplement: supp [file elife-60645-supp-v1.zip]

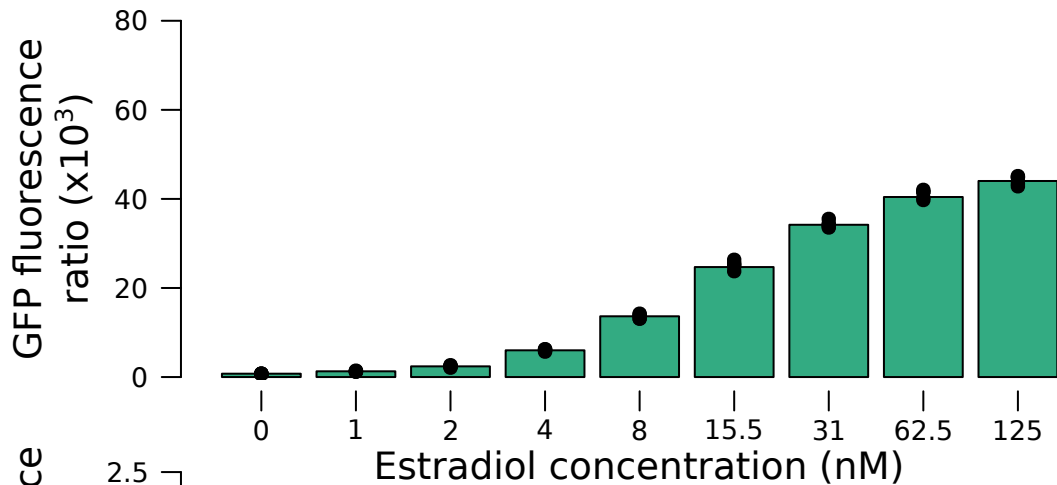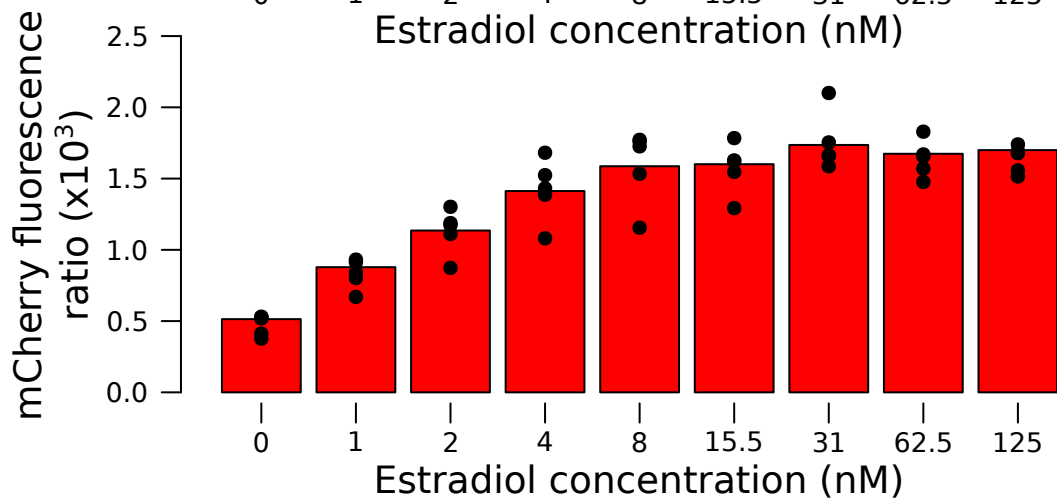

Supplement: supp [file elife-60645-supp-v1.zip]

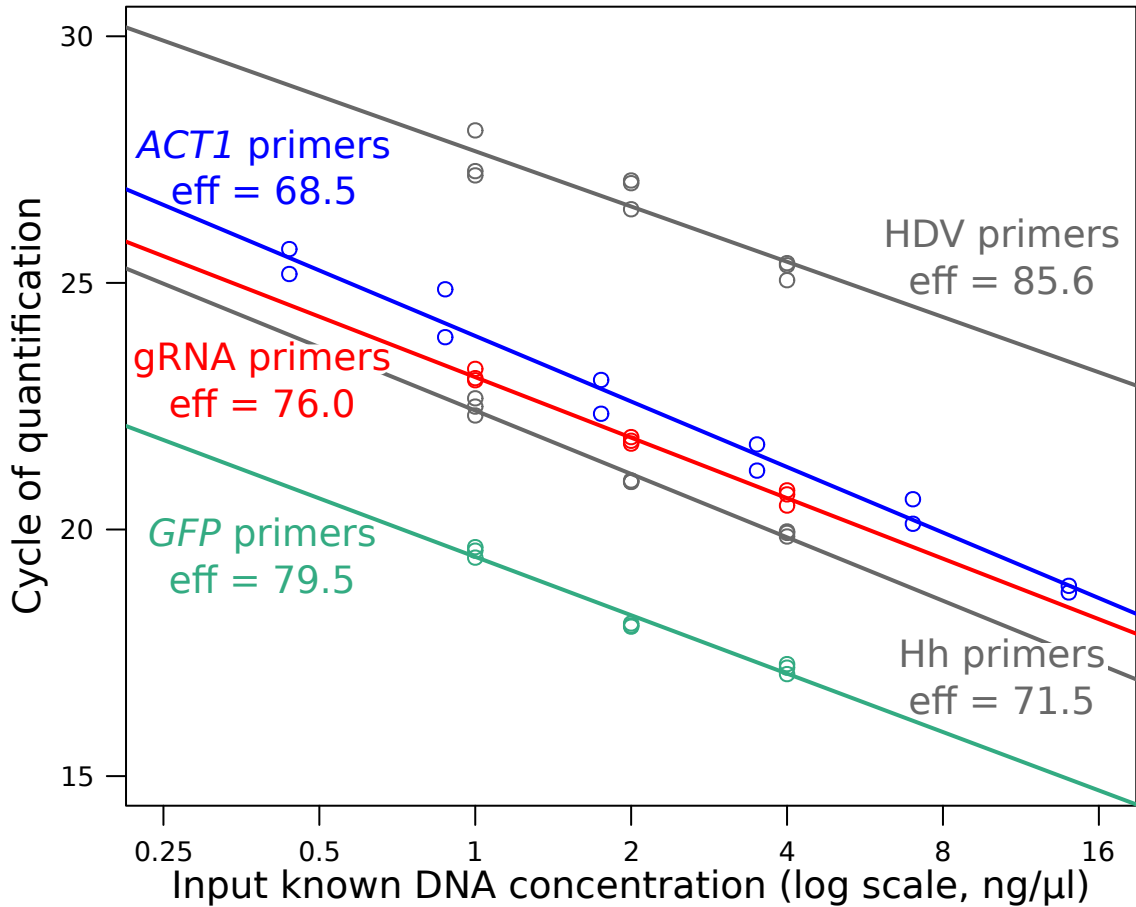

Supplement: supp [file elife-60645-supp-v1.zip]

**A**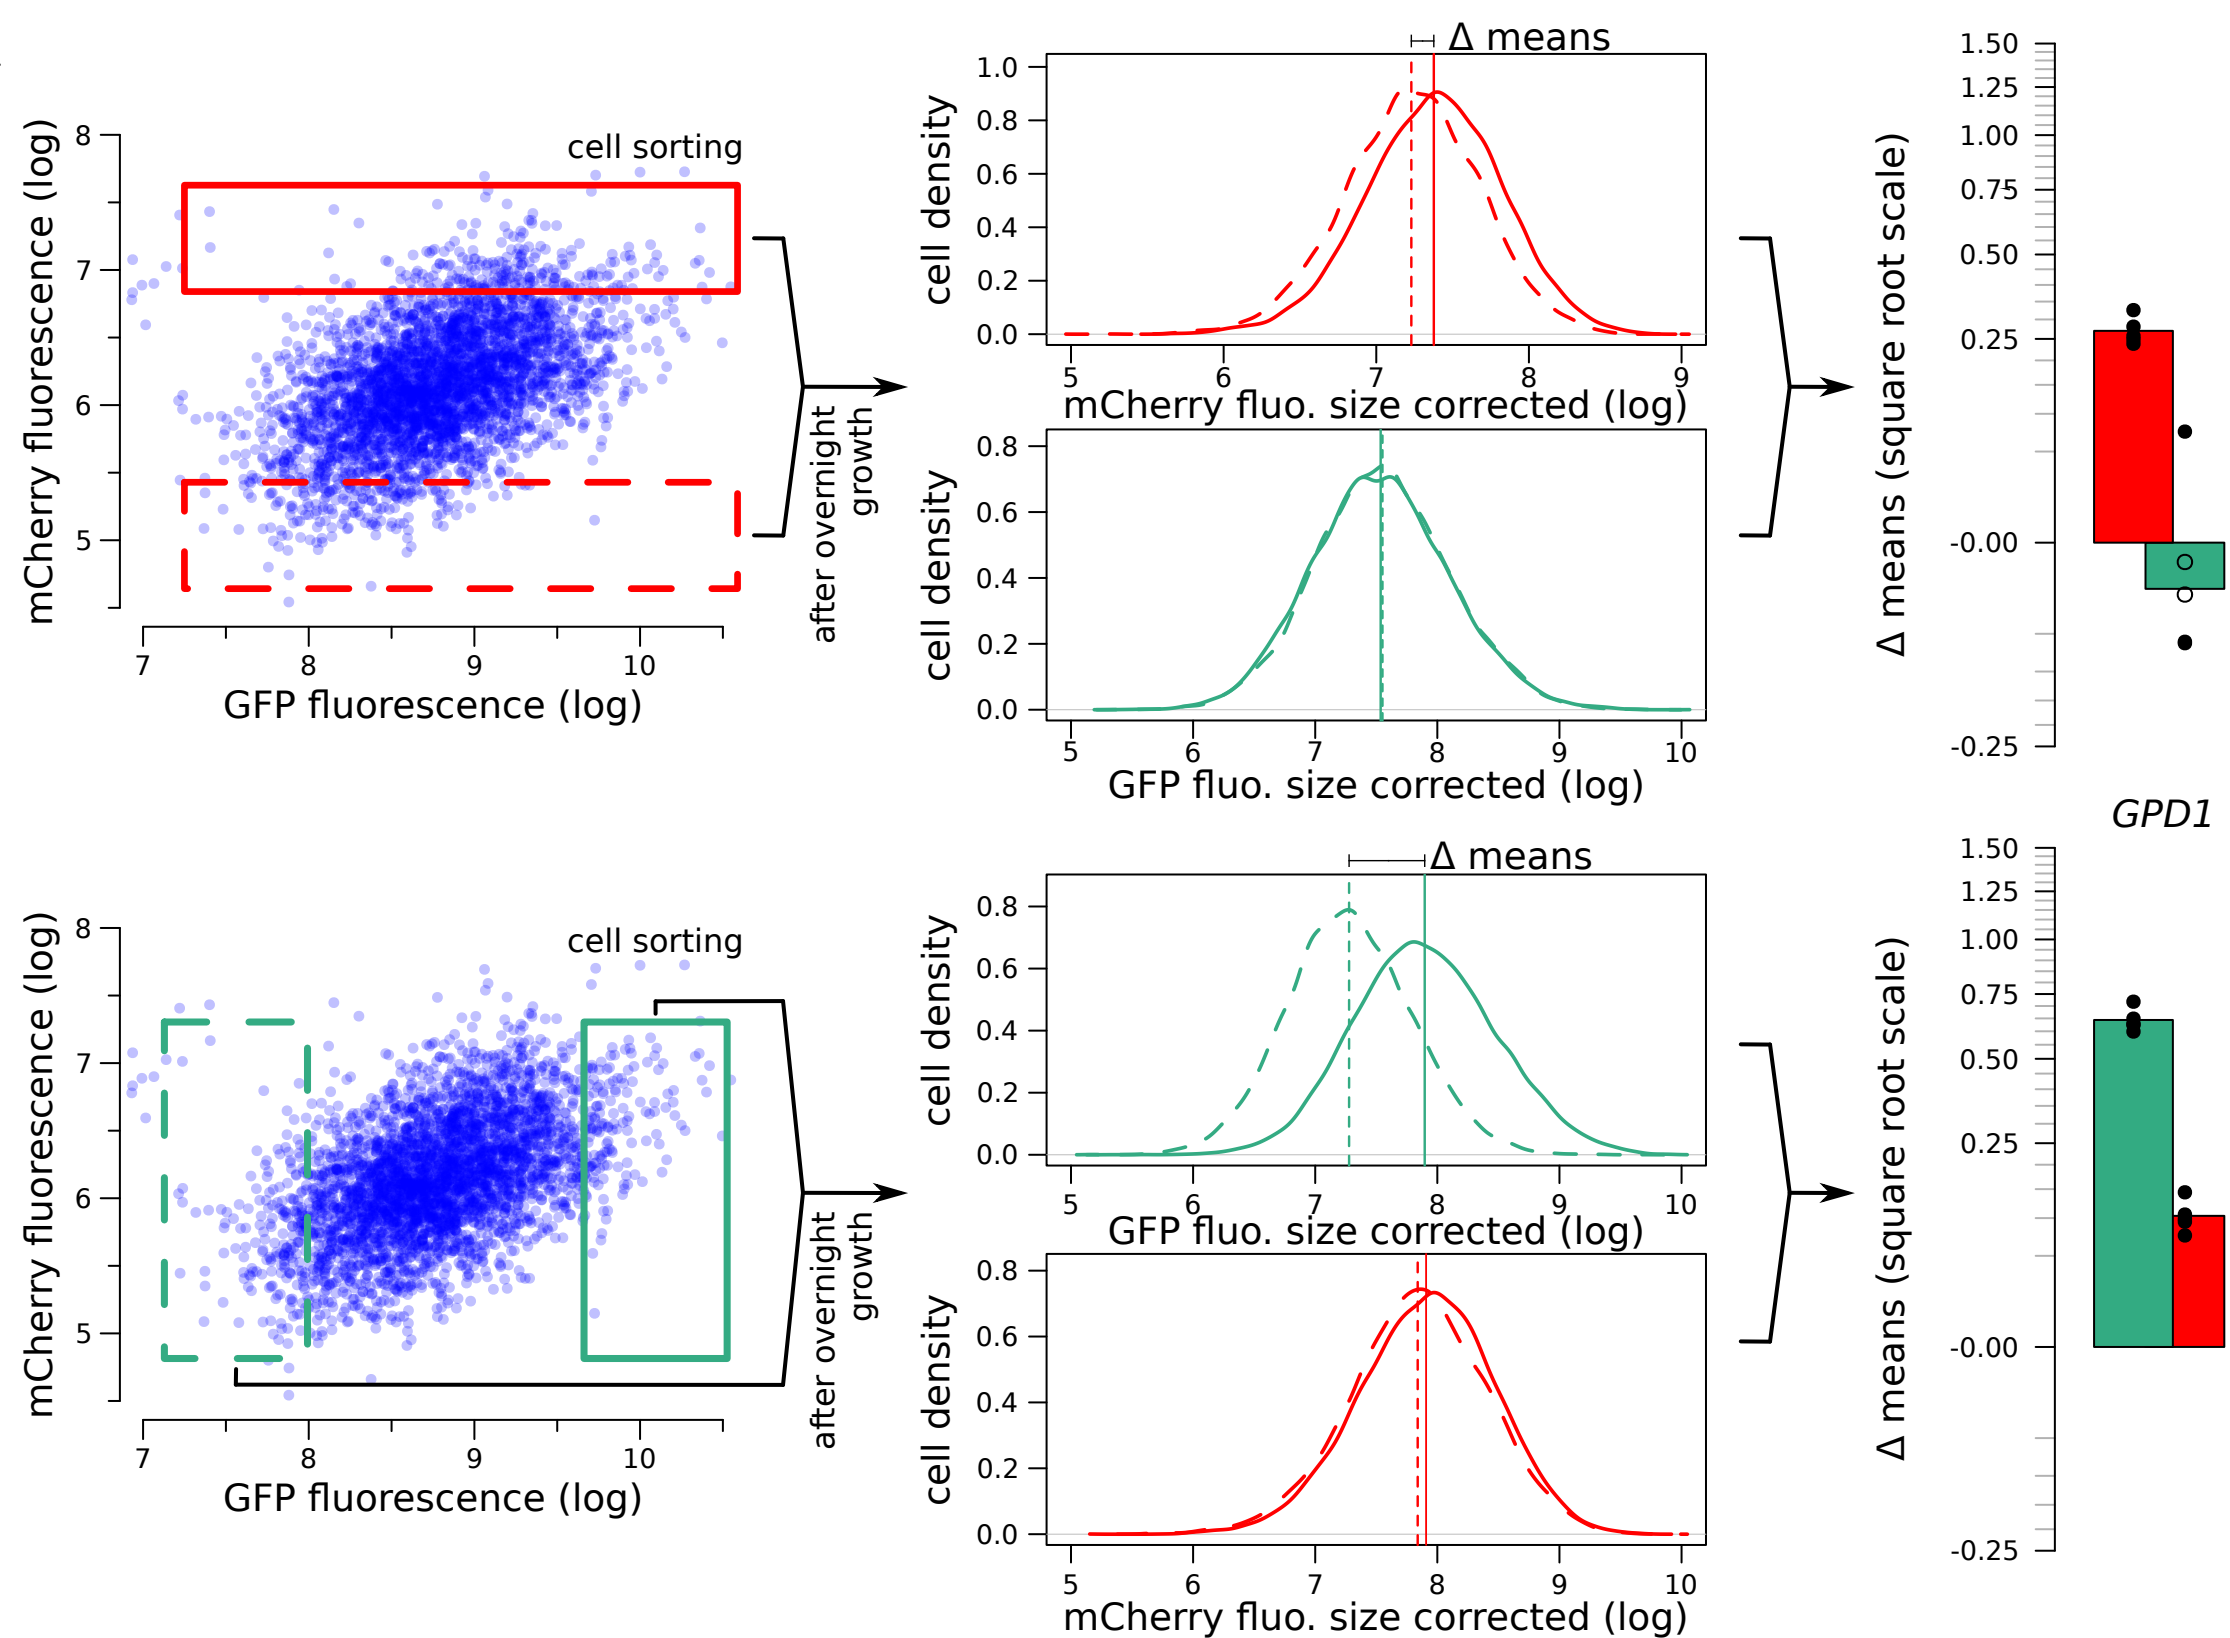**B**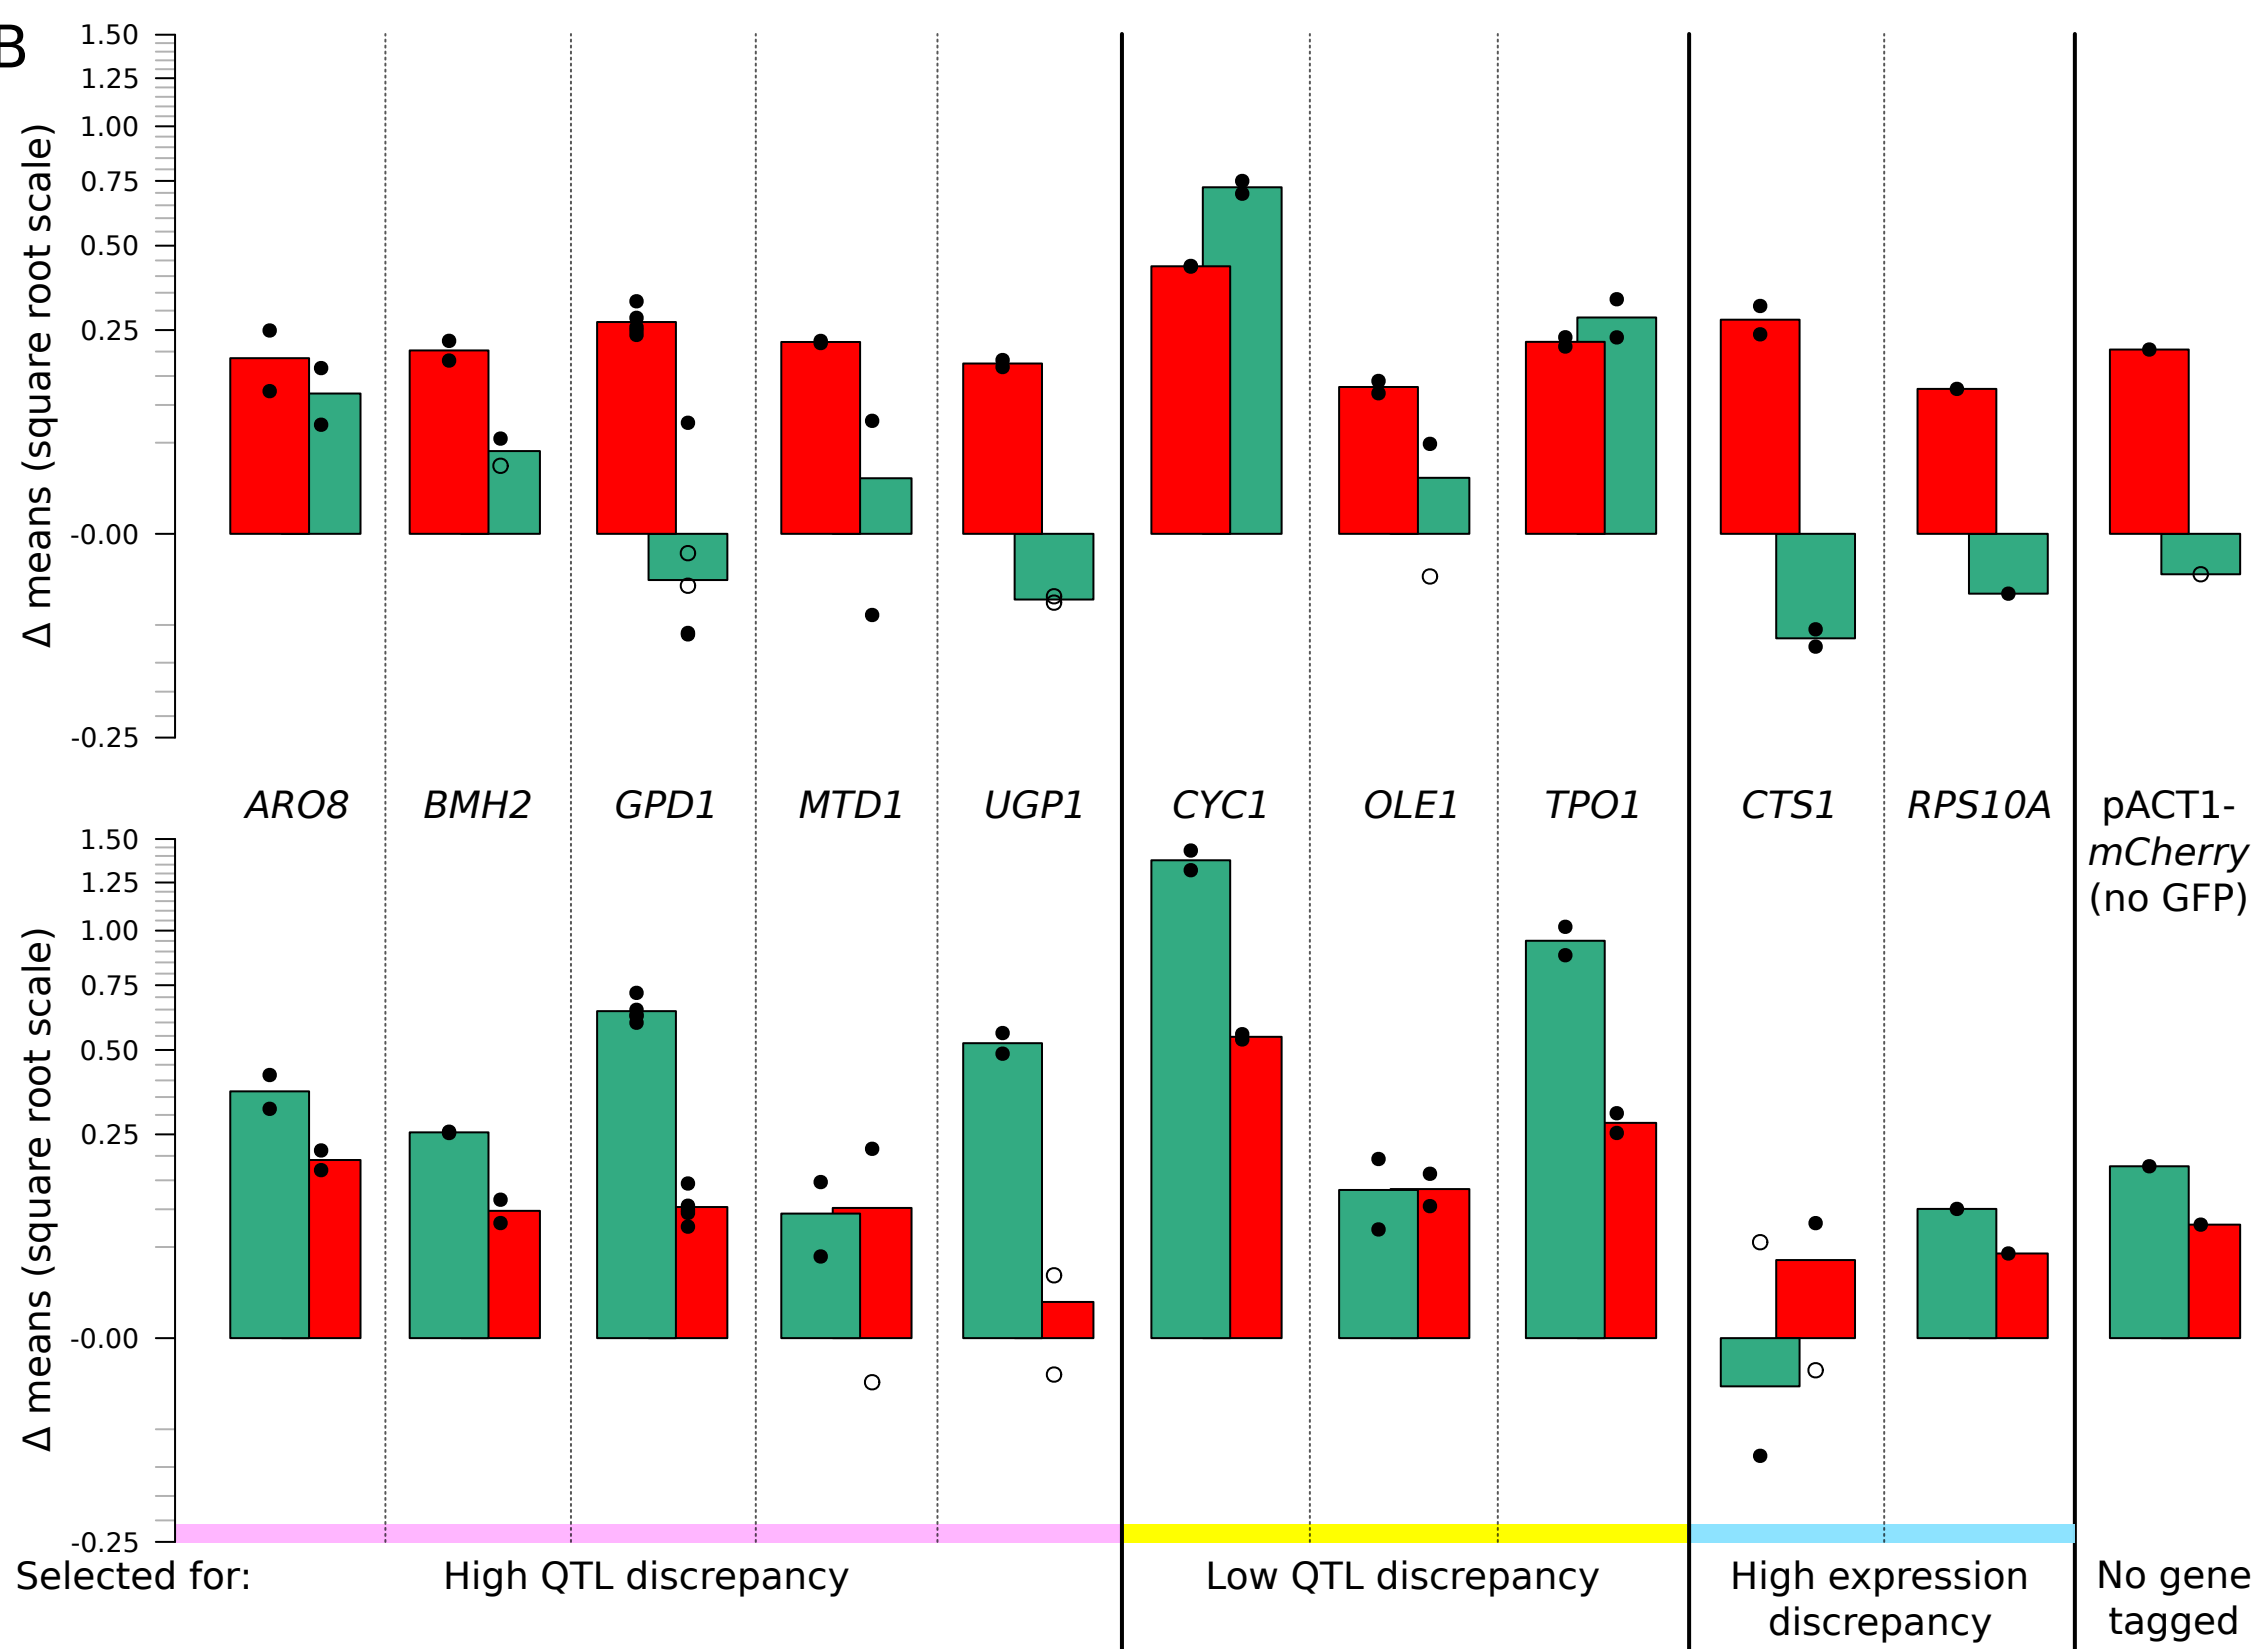

Supplement: supp [file elife-60645-supp-v1.zip]

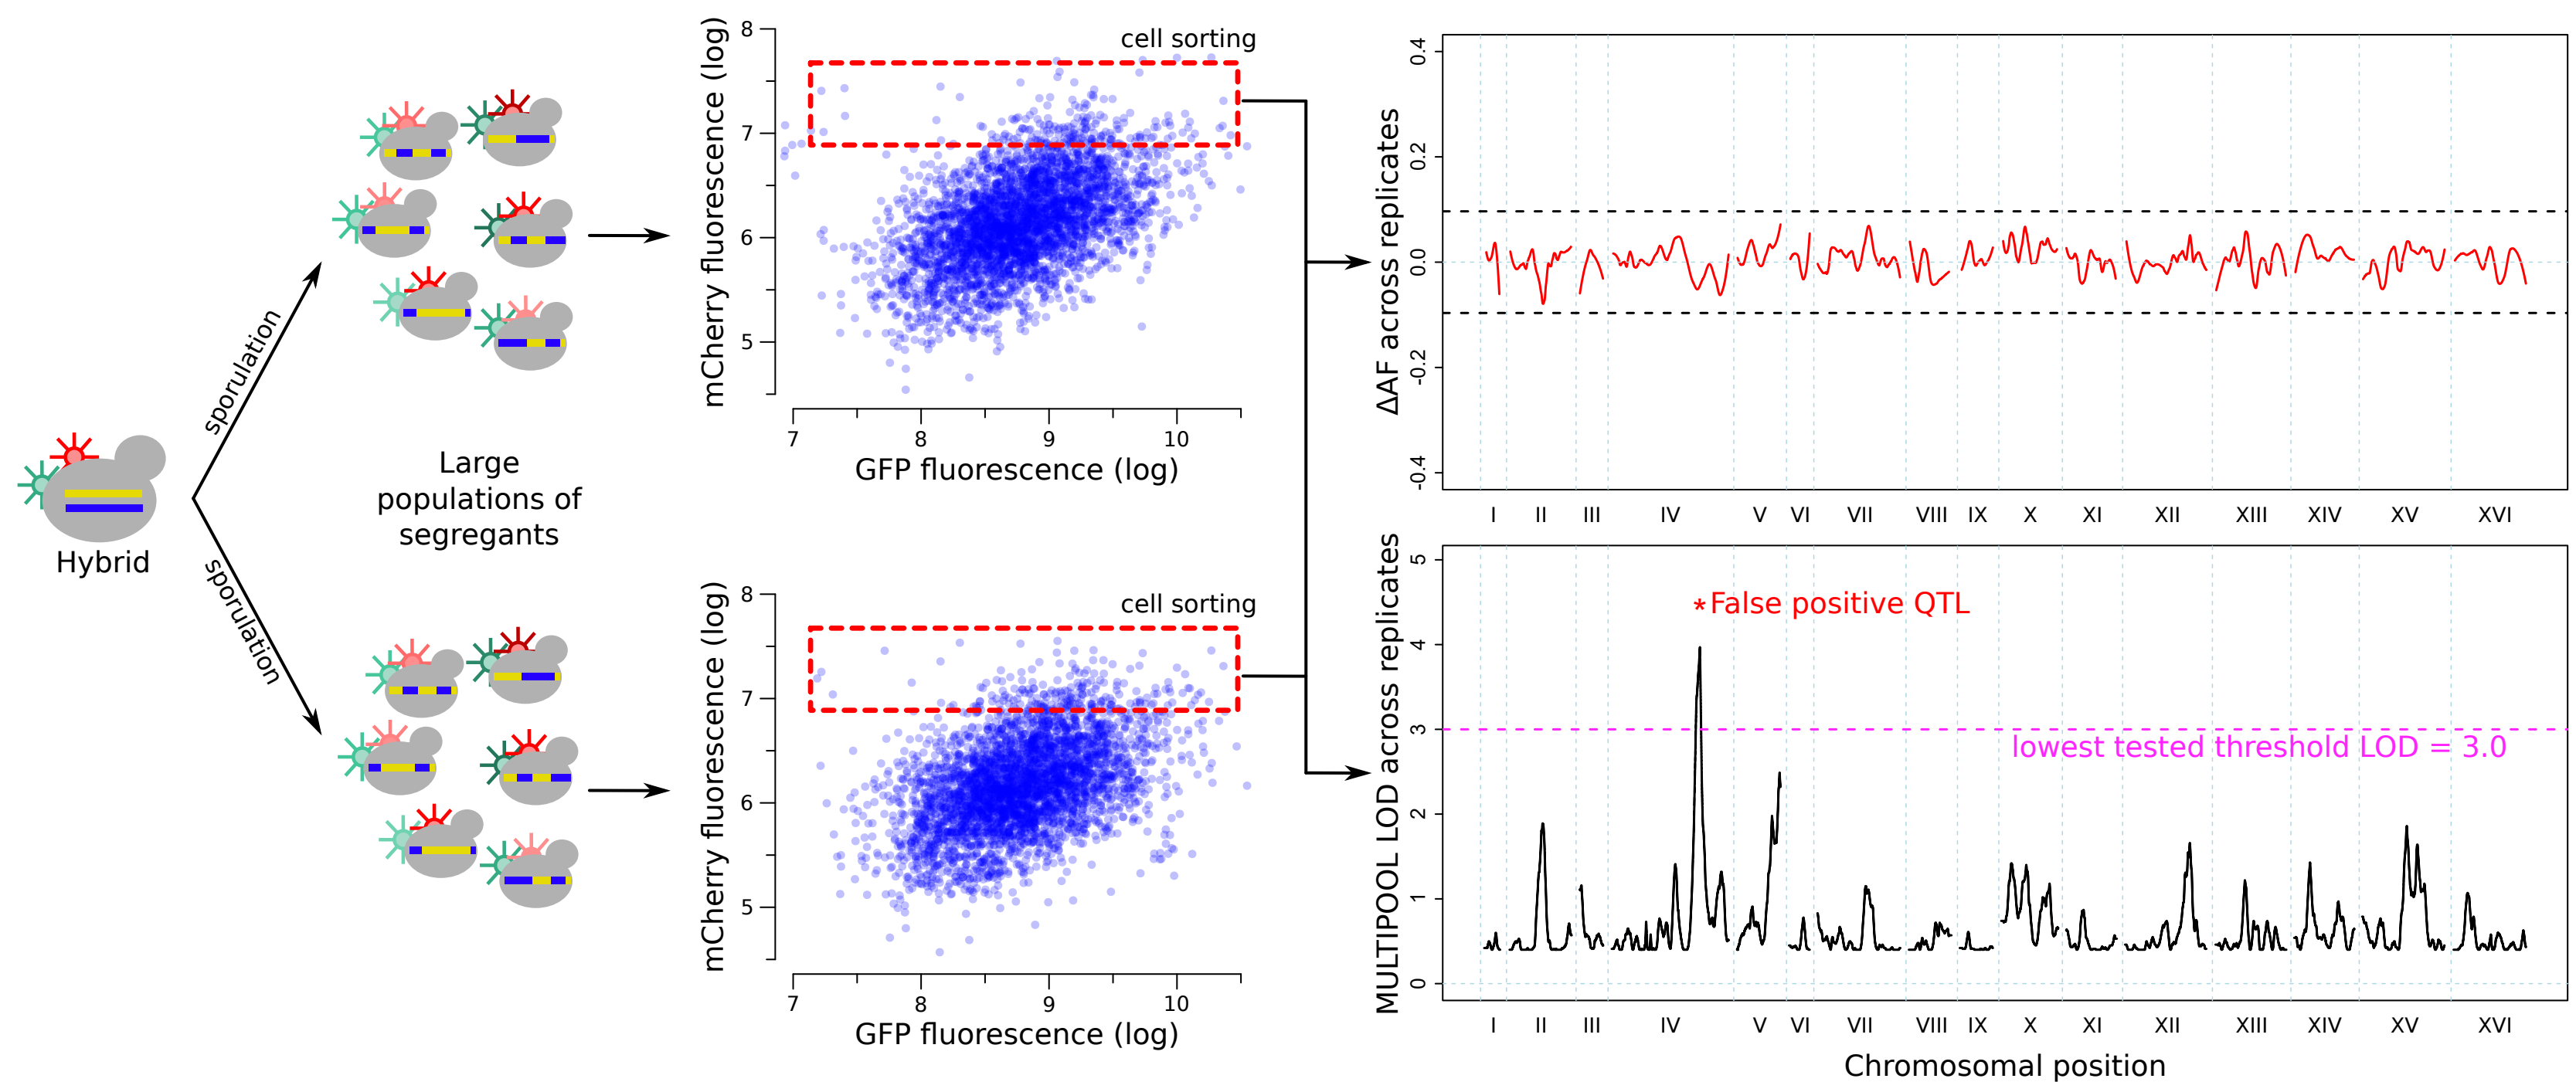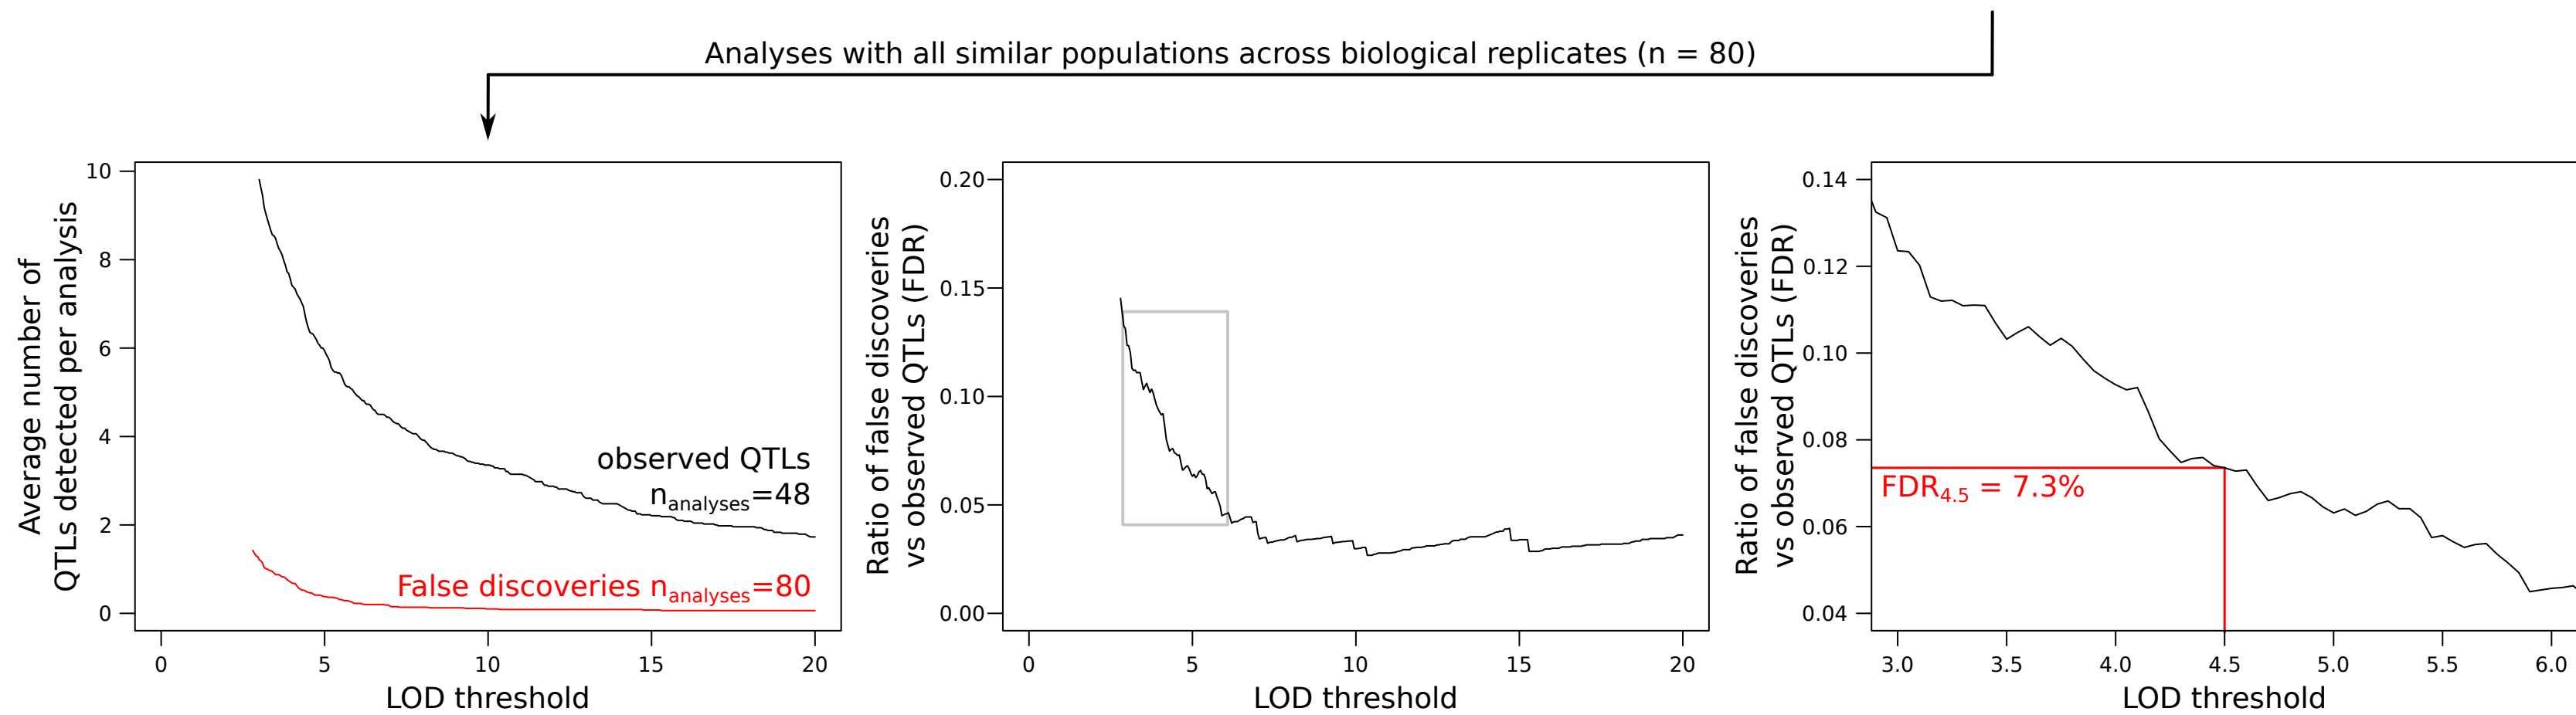

Supplement: supp [file elife-60645-supp-v1.zip]

**A**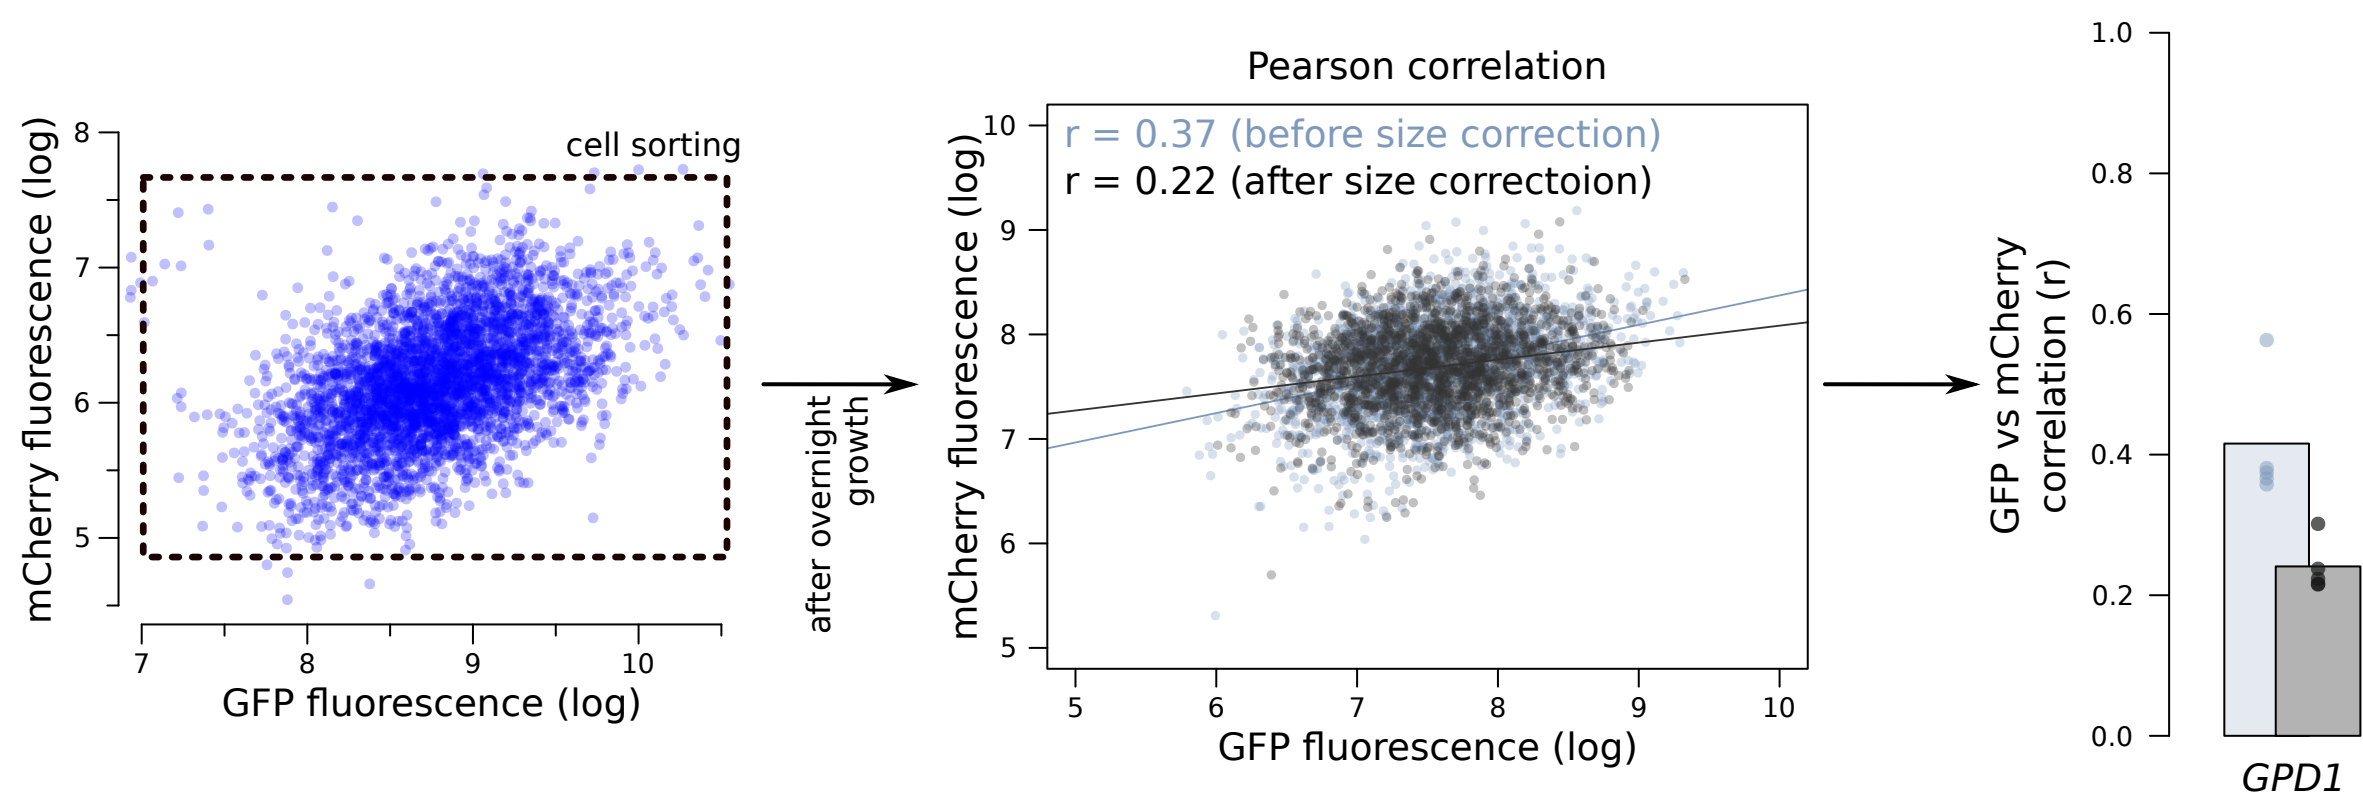**B**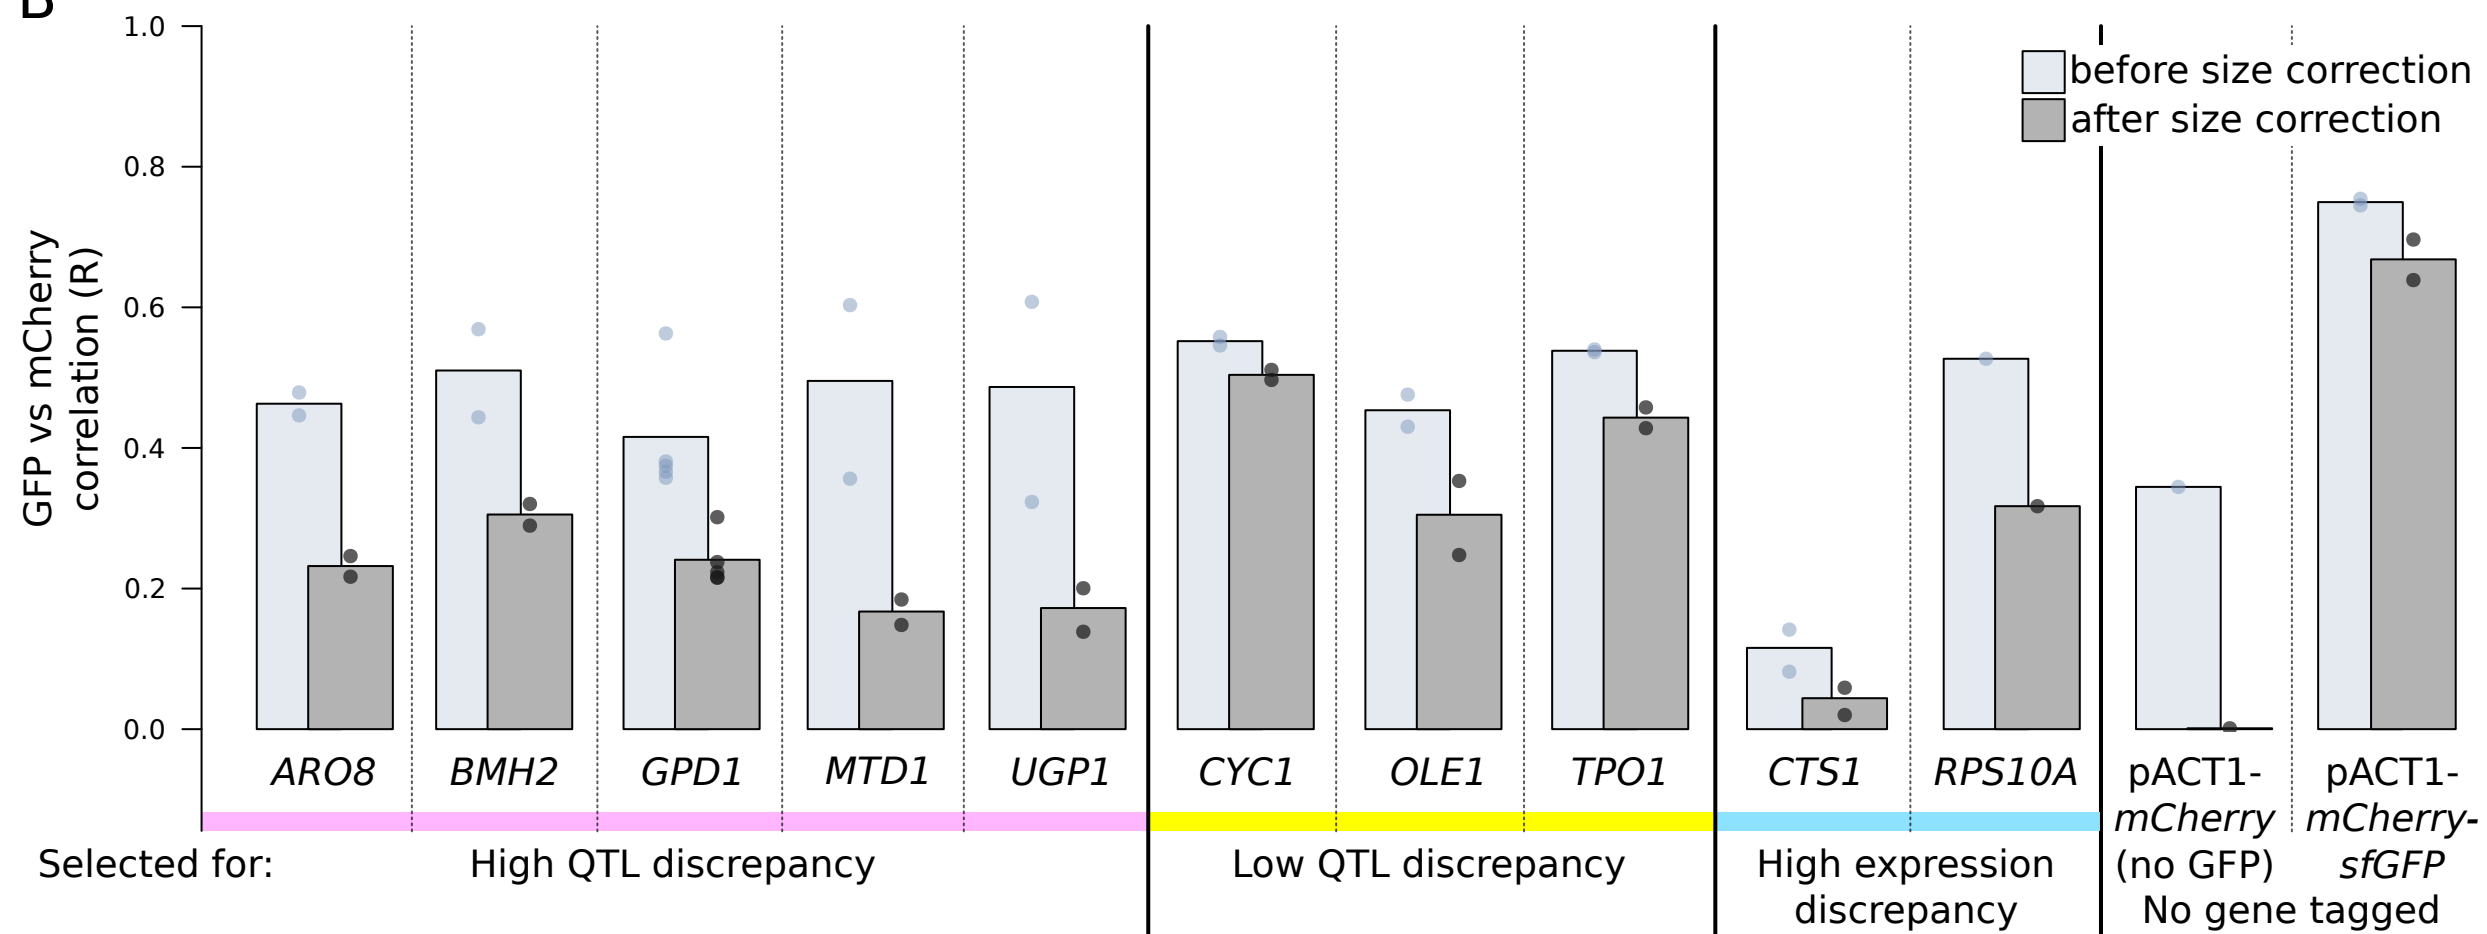

Supplement: supp [file elife-60645-supp-v1.zip]

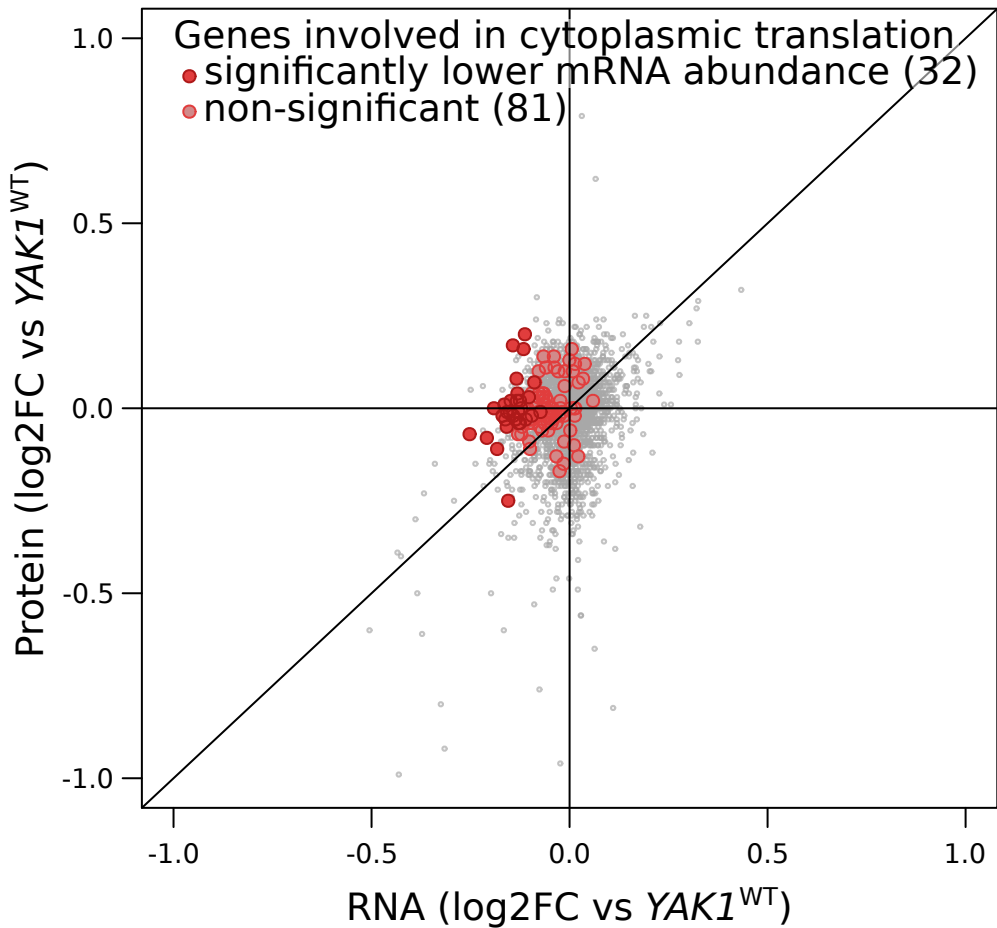

Supplement: supp [file elife-60645-supp-v1.zip]

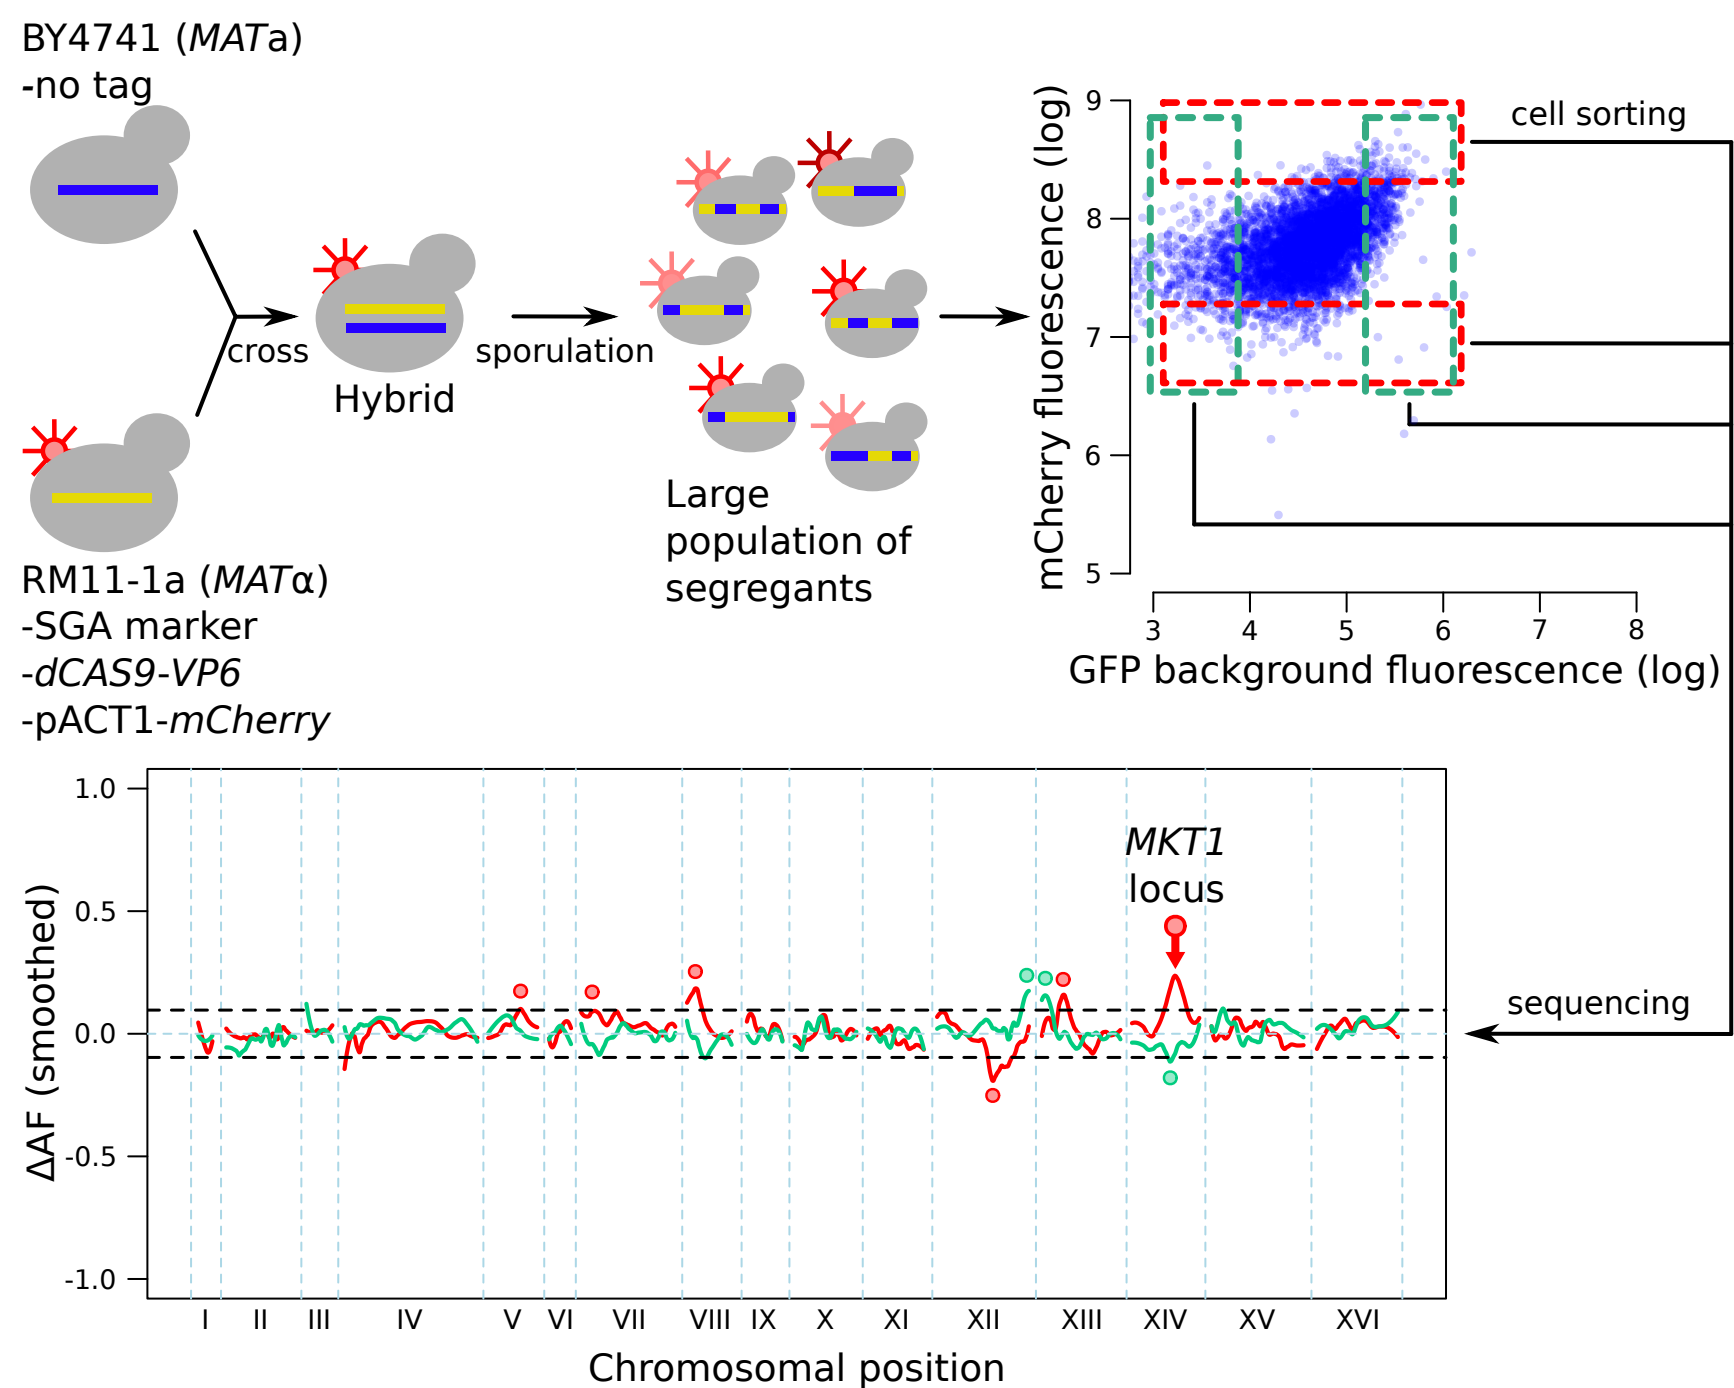

Supplement: supp [file elife-60645-supp-v1.zip]
